# Supplementary material for: Comprehensive Analysis Suggests Overlapping Expression of Rice ONAC Transcription Factors in Abiotic and Biotic Stress Responses
Source: MDPI journal article supplement (doi:10.3390/ijms16024306), 2015-02-17
Supplement: s1 [file s1]

# Supplementary Information

**Supplementary File 3.** Orthologous genes of *ONAC* genes.

| <b>Os01g01470(ONAC020)</b> | <b>Os11g03300(ONAC122)</b> | <b>Os11g05614(ONAC017)</b> | <b>Os02g56600(ONAC032)</b> |
|----------------------------|----------------------------|----------------------------|----------------------------|
| Os01g29840(ONAC026)        | Os12g03040(ONAC131)        | Os12g05990(ONAC134)        | Os04g43560(ONAC008)        |
| Os02g34970(ONAC028)        | Os01g66120(ONAC06)         | Os03g04070(ONAC022)        | Os11g04470(ONAC124)        |
| Os04g35660(ONAC079)        | Os05g34830(ONAC088)        | Os06g51070(ONAC095)        | Os12g04230(ONAC133)        |
| Os10g09820(ONAC111)        | Os01g64310(ONAC059)        | Os02g18460(ONAC044)        | Os11g03310(ONAC123)        |
| Os11g04960(ONAC125)        | Os05g37080(ONAC012)        | Os02g18470(ONAC046)        | Os11g03370(ONAC045)        |
|                            |                            | Os08g23880(ONAC105)        | Os12g03050(ONAC132)        |
| Os12g22630(ONAC136)        | Os11g31330(ONAC025)        | Os03g39050(ONAC064)        | Os01g23710(ONAC030)        |
| Os12g22940(ONAC137)        | Os11g31340(ONAC127)        | Os05g25960(ONAC086)        | Os10g25620(ONAC112)        |
| Os12g23090(ONAC138)        | Os11g31360(ONAC128)        | Os07g09740(ONAC097)        | Os10g25630(ONAC113)        |
|                            | Os11g31380(ONAC129)        | Os07g09830(ONAC098)        | Os10g25640(ONAC114)        |
|                            |                            | Os07g09860(ONAC099)        | Os10g26240(ONAC115)        |
|                            |                            | Os07g13920(ONAC100)        | Os10g26250(ONAC116)        |
|                            |                            | Os07g17180(ONAC101)        | Os10g26270(ONAC117)        |
|                            |                            | Os07g27330(ONAC065)        | Os10g27360(ONAC118)        |
|                            |                            | Os07g27340(ONAC102)        | Os10g27390(ONAC119)        |
|                            |                            |                            | Os10g29680(ONAC026)        |

**Supplementary File 4.** Summary of Experiment Procedures for Microarray Assays Obtained from Rice Array Database.

| S. No.                                                                                                                                                                                                                                                                                                                                                                                                                                                                                                                                                        | Series Accession No. | Sample Description                | No. of Replicates | Reference |
|---------------------------------------------------------------------------------------------------------------------------------------------------------------------------------------------------------------------------------------------------------------------------------------------------------------------------------------------------------------------------------------------------------------------------------------------------------------------------------------------------------------------------------------------------------------|----------------------|-----------------------------------|-------------------|-----------|
| (A) Abiotic stresses                                                                                                                                                                                                                                                                                                                                                                                                                                                                                                                                          |                      |                                   |                   |           |
| 1                                                                                                                                                                                                                                                                                                                                                                                                                                                                                                                                                             | GSE6901              | IR64-7-day-old Seedling (control) | 3                 | [49]      |
|                                                                                                                                                                                                                                                                                                                                                                                                                                                                                                                                                               |                      | IR64-Drought stress               | 3                 |           |
|                                                                                                                                                                                                                                                                                                                                                                                                                                                                                                                                                               |                      | IR64-Salt stress                  | 3                 |           |
|                                                                                                                                                                                                                                                                                                                                                                                                                                                                                                                                                               |                      | IR64-Cold stress                  | 3                 |           |
| Title: Expression Data For Stress Treatment in Rice Seedlings.                                                                                                                                                                                                                                                                                                                                                                                                                                                                                                |                      |                                   |                   |           |
| Overall design: Seven-day-old rice seedlings grown under controlled conditions. For salt treatment (SS), the rice seedlings were transferred to a beaker containing 200 mM NaCl solution for 3 h. For desiccation (DS), rice seedlings were dried for 3 h between folds of tissue paper at 28 ± 1 °C, in a culture room. For cold treatment (CS), the seedlings were kept at 4 ± 1 °C for 3 h. The seedlings kept in water for 3 h, at 28 ± 1 °C, served as control (Seedling). Three biological replicates of each sample were used for microarray analysis. |                      |                                   |                   |           |
| (B) Biotic stresses                                                                                                                                                                                                                                                                                                                                                                                                                                                                                                                                           |                      |                                   |                   |           |
| 2                                                                                                                                                                                                                                                                                                                                                                                                                                                                                                                                                             | GSE7256              | mock inoculated leaf 3 DPI        | 2                 | [52]      |
|                                                                                                                                                                                                                                                                                                                                                                                                                                                                                                                                                               |                      | mock inoculated leaf 4 DPI        | 2                 |           |
|                                                                                                                                                                                                                                                                                                                                                                                                                                                                                                                                                               |                      | FR13 inoculated leaf 3 DPI        | 2                 |           |
|                                                                                                                                                                                                                                                                                                                                                                                                                                                                                                                                                               |                      | FR13 inoculated leaf 4 DPI        | 2                 |           |
| Title: Identification of Rice Genes Differentially Expressed upon Virulent Infection by <i>Magnaporthe grisea</i> .                                                                                                                                                                                                                                                                                                                                                                                                                                           |                      |                                   |                   |           |
| Overall design: Two-week old rice plants (cultivar Nipponbare) were treated with either <i>Magnaporthe grisea</i> (virulent isolate FR13) spore suspension in gelatine or gelatine alone. Two time points were taken (3 and 4 days post inoculation-DPI). Disease symptoms were not visible at 3 DPI whereas they were at 4 DPI. Two biological repeats were done.                                                                                                                                                                                            |                      |                                   |                   |           |
| 3                                                                                                                                                                                                                                                                                                                                                                                                                                                                                                                                                             | GSE18361             | Mock inoculated root 2 DPI        | 2                 | [53]      |
|                                                                                                                                                                                                                                                                                                                                                                                                                                                                                                                                                               |                      | Mock inoculated root 4 DPI        | 2                 |           |
|                                                                                                                                                                                                                                                                                                                                                                                                                                                                                                                                                               |                      | Mock inoculated root 6 DPI        | 2                 |           |
|                                                                                                                                                                                                                                                                                                                                                                                                                                                                                                                                                               |                      | Guy11 inoculated root 2 DPI       | 2                 |           |
|                                                                                                                                                                                                                                                                                                                                                                                                                                                                                                                                                               |                      | Guy11 inoculated root 4 DPI       | 2                 |           |
|                                                                                                                                                                                                                                                                                                                                                                                                                                                                                                                                                               |                      | Guy11 inoculated root 6 DPI       | 2                 |           |
| Title: Temporal Gene Expression Analysis from Rice Root (cv. Nipponbare) Infected with <i>Magnaporthe oryzae</i> Strain Guy11.                                                                                                                                                                                                                                                                                                                                                                                                                                |                      |                                   |                   |           |
| Overall design: The global transcriptome response overtime of Mock- and M. oryzae inoculated rice root tissue in vitro were investigated. Two independant replicates were performed for each treatment and samples were collected at 2, 4 and 6 days post-inoculation.                                                                                                                                                                                                                                                                                        |                      |                                   |                   |           |

## Supplementary File 4. Cont.

| S. No.                                                                                                                                                                                                                                                                                                                                                                                                                                   | Series Accession No. | Sample Description                                                                                                                  | No. of Replicates | Reference |
|------------------------------------------------------------------------------------------------------------------------------------------------------------------------------------------------------------------------------------------------------------------------------------------------------------------------------------------------------------------------------------------------------------------------------------------|----------------------|-------------------------------------------------------------------------------------------------------------------------------------|-------------------|-----------|
| 4                                                                                                                                                                                                                                                                                                                                                                                                                                        | GSE10373             | IAC165, mock-infection 2 DPI                                                                                                        | 2                 | [57]      |
|                                                                                                                                                                                                                                                                                                                                                                                                                                          |                      | IAC165, infection <i>S. hermonthica</i> 2 DPI                                                                                       | 2                 |           |
|                                                                                                                                                                                                                                                                                                                                                                                                                                          |                      | IAC165, mock-infection 4 DPI                                                                                                        | 2                 |           |
|                                                                                                                                                                                                                                                                                                                                                                                                                                          |                      | IAC165, infection <i>S. hermonthica</i> 4 DPI                                                                                       | 2                 |           |
|                                                                                                                                                                                                                                                                                                                                                                                                                                          |                      | IAC165, mock infection 11DPI                                                                                                        | 2                 |           |
|                                                                                                                                                                                                                                                                                                                                                                                                                                          |                      | IAC165, infection <i>S. hermonthica</i> 11 DPI                                                                                      | 2                 |           |
|                                                                                                                                                                                                                                                                                                                                                                                                                                          |                      | Nipponbare, Mock infection 2 DPI                                                                                                    | 2                 |           |
|                                                                                                                                                                                                                                                                                                                                                                                                                                          |                      | Nipponbare, infection <i>S.hermonthica</i> 2 DPI                                                                                    | 2                 |           |
|                                                                                                                                                                                                                                                                                                                                                                                                                                          |                      | Nipponbare, Mock infection 4 DPI                                                                                                    | 2                 |           |
|                                                                                                                                                                                                                                                                                                                                                                                                                                          |                      | Nipponbare,infection <i>S.hermonthica</i> 4 DPI                                                                                     | 2                 |           |
|                                                                                                                                                                                                                                                                                                                                                                                                                                          |                      | Nipponbare, Mock infection 11 DPI                                                                                                   | 2                 |           |
|                                                                                                                                                                                                                                                                                                                                                                                                                                          |                      | Nipponbare, infection <i>S.hermonthica</i> 11 DPI                                                                                   | 2                 |           |
|                                                                                                                                                                                                                                                                                                                                                                                                                                          |                      | <b>Title: Rice Cultivars Undergoing a Susceptible and Resistant Interaction with the Parasitic Plant <i>Striga hermonthica</i>.</b> |                   |           |
| <b>Overall design:</b> Using rice cultivars Nipponbare, which exhibits resistance to <i>Striga hermonthica</i> , and IAC165, which is susceptible. Root tissue was harvested from two cultivars of rice that had been infected with <i>Striga hermonthica</i> (or from uninfected control tissue). Three time points were used (2, 4 and 11 days after infection or mock-inoculation) using two replicate chips per treatment/timepoint. |                      |                                                                                                                                     |                   |           |
| 5                                                                                                                                                                                                                                                                                                                                                                                                                                        | GSE11025             | WuYun3-RSV infected                                                                                                                 | 3                 | [56]      |
|                                                                                                                                                                                                                                                                                                                                                                                                                                          |                      | WuYun3-non-infected                                                                                                                 | 3                 |           |
|                                                                                                                                                                                                                                                                                                                                                                                                                                          |                      | KT95-418-RSV infected                                                                                                               | 3                 |           |
|                                                                                                                                                                                                                                                                                                                                                                                                                                          |                      | KT95-418-non-infected                                                                                                               | 3                 |           |
| <b>Title: Comparative transcriptional profiling of two contrasting rice genotypes in response to rice stripe virus infection.</b>                                                                                                                                                                                                                                                                                                        |                      |                                                                                                                                     |                   |           |
| <b>Overall design:</b> Two japonica rice genotypes WuYun3 and KT95-418 in response to RSV infection. Nine-day-old 20 rice seedlings were exposed to approximately 100 viruliferous small brown planthoppers ( <i>Laodelphax striatellus</i> Fall) for two days to be innoculated by RSV. Then they were transplanted in insect-free greenhouse at 25 ± 3 °C with a daily photope.                                                        |                      |                                                                                                                                     |                   |           |
| 6                                                                                                                                                                                                                                                                                                                                                                                                                                        | GSE16793             | XOC–time: 2 hai                                                                                                                     | 4                 | [55]      |
|                                                                                                                                                                                                                                                                                                                                                                                                                                          |                      | XOC–time: 4 hai                                                                                                                     | 4                 |           |
|                                                                                                                                                                                                                                                                                                                                                                                                                                          |                      | XOC–time: 8 hai                                                                                                                     | 4                 |           |
|                                                                                                                                                                                                                                                                                                                                                                                                                                          |                      | XOC–time: 24 hai                                                                                                                    | 4                 |           |
|                                                                                                                                                                                                                                                                                                                                                                                                                                          |                      | XOC–time: 96 hai                                                                                                                    | 4                 |           |
|                                                                                                                                                                                                                                                                                                                                                                                                                                          |                      | XOO–time: 2 hai                                                                                                                     | 4                 |           |
|                                                                                                                                                                                                                                                                                                                                                                                                                                          |                      | XOO–time: 4 hai                                                                                                                     | 4                 |           |
|                                                                                                                                                                                                                                                                                                                                                                                                                                          |                      | XOO–time: 8 hai                                                                                                                     | 4                 |           |
|                                                                                                                                                                                                                                                                                                                                                                                                                                          |                      | XOO–time: 24 hai                                                                                                                    | 4                 |           |
|                                                                                                                                                                                                                                                                                                                                                                                                                                          |                      | XOO–time: 96 hai                                                                                                                    | 4                 |           |
|                                                                                                                                                                                                                                                                                                                                                                                                                                          |                      | MOCK–time: 2 hai                                                                                                                    | 4                 |           |
|                                                                                                                                                                                                                                                                                                                                                                                                                                          |                      | MOCK–time: 4 hai                                                                                                                    | 4                 |           |
|                                                                                                                                                                                                                                                                                                                                                                                                                                          |                      | MOCK–time: 8 hai                                                                                                                    | 4                 |           |
|                                                                                                                                                                                                                                                                                                                                                                                                                                          |                      | MOCK–time: 24 hai                                                                                                                   | 4                 |           |
|                                                                                                                                                                                                                                                                                                                                                                                                                                          |                      | MOCK–time: 96 hai                                                                                                                   | 4                 |           |

Supplementary File 4. *Cont.*

| S. No.                                                                                                                                                                                                                                                                                                                                                                                                                                                                                                                                                                                                                                                                                                                                                                                                                                                                                                                                                                                                                                                                                                                                                                                                                                                                                                                                                                            | Series Accession No. | Sample Description | No. of Replicates | Reference |
|-----------------------------------------------------------------------------------------------------------------------------------------------------------------------------------------------------------------------------------------------------------------------------------------------------------------------------------------------------------------------------------------------------------------------------------------------------------------------------------------------------------------------------------------------------------------------------------------------------------------------------------------------------------------------------------------------------------------------------------------------------------------------------------------------------------------------------------------------------------------------------------------------------------------------------------------------------------------------------------------------------------------------------------------------------------------------------------------------------------------------------------------------------------------------------------------------------------------------------------------------------------------------------------------------------------------------------------------------------------------------------------|----------------------|--------------------|-------------------|-----------|
| <b>Title: Comparative Transcriptional Profiling of Rice Undergoing Infection by <i>X. oryzae</i> pv. <i>oryzae</i> or by <i>X. oryzae</i> pv. <i>oryzicola</i>.</b>                                                                                                                                                                                                                                                                                                                                                                                                                                                                                                                                                                                                                                                                                                                                                                                                                                                                                                                                                                                                                                                                                                                                                                                                               |                      |                    |                   |           |
| <p><b>Overall design:</b> Plant Material: <i>Oryza sativa</i> ssp. <i>japonica</i> cv. Nipponbare plants were grown in growth chambers under a 12 h, 28 °C light and a 12 h, 25 °C dark cycle. Bacterial Strains and preparation of inoculum: Xoo strain PXO99A and Xoc strain BLS256 were used. Fourteen days after sowing, and 2 h after the beginning of the light period, seedlings were inverted into inoculum, one flat each for Xoo, Xoc and Mock inoculum consisting of sterile 10 mM MgCl<sub>2</sub> with 0.5% Tween-20, and vacuum infiltrated at 500 mm Hg for two minutes, two consecutive times, in a custom-made chamber. Following inoculation, plants were returned to the growth chamber. The harvest of inoculated tissue at 2, 4, 8, 24 and 96 h was made using a separate randomized complete block design. Tissue was harvested from plants in four pots for each timepoint per inoculum per replication. Harvested tissue was immediately frozen in liquid nitrogen and stored at –80 °C until processing. Total RNA was initially isolated from frozen whole plant tissue using the hot TRIzol reagent protocol for barley. The RNA was purified using Qiagen RNeasy spin columns, and adjusted to a final concentration of 1 ug/uL. Probe synthesis, labeling, and hybridization were performed at the Iowa State University GeneChip Core facility.</p> |                      |                    |                   |           |

**Supplementary File 5.** Heat map of 107 *ONAC* genes under various stress conditions. Heat map of 107 *ONAC* genes under abiotic (salt, dry and cold) and biotic (*M. oryzae*, RSV, *Xoo*, *Xoc*, and *S. hemonhica*) stresses. Change values in treated samples as compared to its corresponding mock-treated ( $\log_2^{\text{(treated-signal intensity/mock-signal intensity)}} = \log_2^{\text{treated-signal intensity}} - \log_2^{\text{mock-signal intensity}}$ ) were used for treeview (Supplementary File 2).

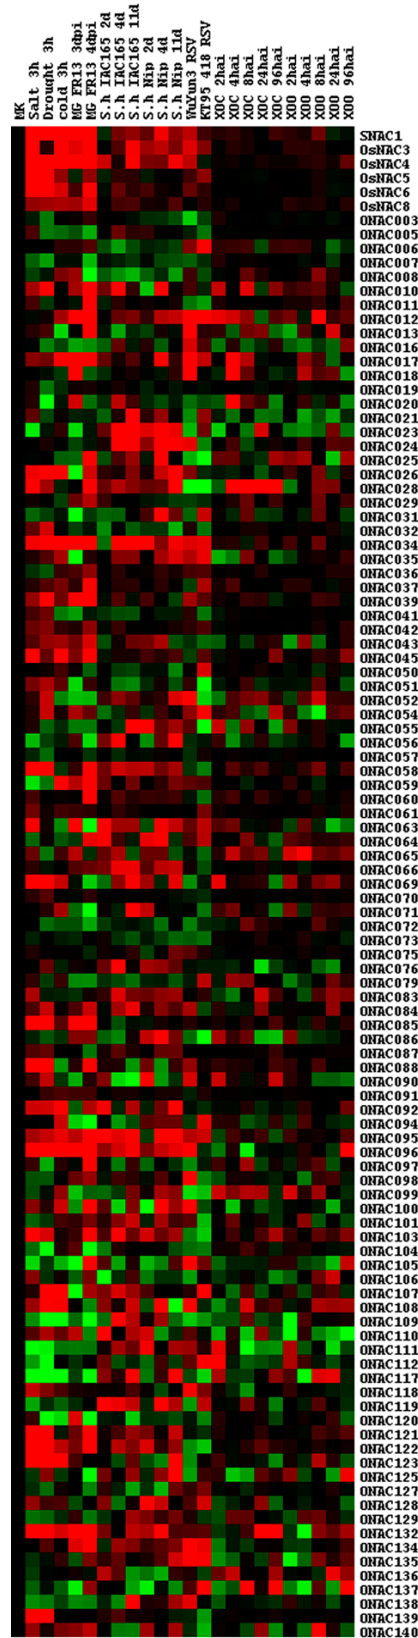

Supplementary File 6. *ONAC* gene family in rice.

| Locus          | Name    | ORF<br>Length (bp) | Protein<br>Length (aa) | Pseudomolecule Position | pI      | Mol.<br>Wt. (Da) |
|----------------|---------|--------------------|------------------------|-------------------------|---------|------------------|
| LOC_Os03g60080 | SNAC1   | 951                | 317                    | 34166099–34167546       | 7.1466  | 35177.8          |
| LOC_Os02g36880 | OsNAC1  | 1125               | 375                    | 22258915–22260681       | 7.2026  | 40382.6          |
| LOC_Os04g38720 | OsNAC2  | 1032               | 344                    | 22994552–22996740       | 7.6435  | 36838.7          |
| LOC_Os07g12340 | OsNAC3  | 831                | 277                    | 6967999–6969311         | 6.4107  | 30860.9          |
| LOC_Os01g60020 | OsNAC4  | 957                | 319                    | 34694391–34692830       | 8.4406  | 35347            |
| LOC_Os11g08210 | OsNAC5  | 990                | 330                    | 4301783–4299149         | 5.4489  | 35522.8          |
| LOC_Os01g66120 | OsNAC6  | 912                | 304                    | 38401533–38398517       | 9.0566  | 32906.7          |
| LOC_Os06g33940 | OsNAC7  | 1131               | 377                    | 19746457–19743865       | 7.1204  | 41411.8          |
| LOC_Os01g15640 | OsNAC8  | 1470               | 490                    | 8797363–8792646         | 5.0112  | 54693.9          |
| LOC_Os09g33490 | ONAC001 | 744                | 248                    | 19748819–19750179       | 9.8914  | 26168.2          |
| LOC_Os01g09550 | ONAC003 | 1461               | 487                    | 4884872–4879148         | 7.9771  | 54334.9          |
| LOC_Os08g42400 | ONAC005 | 699                | 233                    | 26764597–26767134       | 10.2589 | 24691.1          |
| LOC_Os03g42630 | ONAC006 | 972                | 324                    | 23732858–23734467       | 6.7853  | 34848.3          |
| LOC_Os06g04090 | ONAC007 | 1188               | 396                    | 1701522–1699018         | 7.0686  | 42026.8          |
| LOC_Os04g43560 | ONAC008 | 837                | 279                    | 25588380–25590766       | 6.4017  | 30802.2          |
| LOC_Os07g37920 | ONAC010 | 1278               | 426                    | 22756479–22754883       | 7.3237  | 45096.2          |
| LOC_Os06g46270 | ONAC011 | 915                | 305                    | 28036857–28040642       | 7.8228  | 34083.6          |
| LOC_Os05g37080 | ONAC012 | 825                | 275                    | 21607056–21605846       | 5.2477  | 30459.4          |
| LOC_Os02g15340 | ONAC013 | 1080               | 360                    | 8582933–8584294         | 6.8724  | 39268.5          |
| LOC_Os07g48550 | ONAC015 | 906                | 302                    | 29041116–29040012       | 5.6443  | 34121.5          |
| LOC_Os01g01430 | ONAC016 | 1023               | 341                    | 216126–217664           | 6.4456  | 37760            |
| LOC_Os11g05614 | ONAC017 | 885                | 295                    | 2546609–2547577         | 6.5128  | 31246.8          |
| LOC_Os10g38834 | ONAC018 | 1026               | 342                    | 20671799–20678392       | 4.8801  | 37539.7          |
| LOC_Os06g01230 | ONAC019 | 1179               | 393                    | 155556–154091           | 7.5817  | 43970.4          |
| LOC_Os01g01470 | ONAC020 | 963                | 321                    | 240908–241977           | 6.7133  | 35726.5          |
| LOC_Os09g12380 | ONAC021 | 1488               | 396                    | 7077809–7076322         | 6.6384  | 52168.7          |
| LOC_Os03g04070 | ONAC022 | 951                | 317                    | 1863116–1861572         | 7.7186  | 34927.2          |
| LOC_Os02g12310 | ONAC023 | 759                | 253                    | 6404018–6405879         | 5.2857  | 28162.6          |
| LOC_Os05g34310 | ONAC024 | 933                | 311                    | 20247654–20246301       | 4.6038  | 33889.1          |
| LOC_Os11g31330 | ONAC025 | 903                | 301                    | 17822319–17824224       | 6.8377  | 32983.4          |
| LOC_Os01g29840 | ONAC026 | 1002               | 334                    | 16721326–16720227       | 6.7805  | 37382.6          |
| LOC_Os02g34970 | ONAC028 | 615                | 305                    | 20966976–20967797       | 6.7308  | 22802.4          |
| LOC_Os08g02300 | ONAC029 | 1203               | 401                    | 855394–857110           | 6.9338  | 42429            |
| LOC_Os01g23710 | ONAC030 | 1383               | 461                    | 13344258–13342044       | 4.0151  | 47459.1          |
| LOC_Os08g01330 | ONAC031 | 975                | 325                    | 211092–209881           | 6.3172  | 36235.2          |
| LOC_Os02g56600 | ONAC032 | 996                | 332                    | 34667723–34670142       | 7.4375  | 36318.6          |
| LOC_Os01g28050 | ONAC033 | 798                | 266                    | 15692133–15692930       | 8.1439  | 28832.2          |
| LOC_Os01g48460 | ONAC034 | 873                | 291                    | 27774546–27775418       | 9.3666  | 31267.71         |
| LOC_Os01g59640 | ONAC035 | 1206               | 402                    | 34491653–34489762       | 5.5009  | 45485.8          |
| LOC_Os05g35170 | ONAC036 | 1350               | 450                    | 20820419–20818302       | 4.5984  | 49739.4          |
| LOC_Os08g06140 | ONAC037 | 2193               | 731                    | 3392243–3388562         | 4.3979  | 80654.6          |
| LOC_Os01g71790 | ONAC038 | 615                | 205                    | 41583422–41584036       | 9.3206  | 22478.4          |
| LOC_Os03g21030 | ONAC039 | 1077               | 359                    | 11938012–11936702       | 5.6079  | 39199.2          |
| LOC_Os08g44820 | ONAC040 | 1971               | 657                    | 28146431–28142734       | 4.3379  | 71937.4          |

Supplementary File 6. *Cont.*

| Locus          | Name    | ORF<br>Length (bp) | Protein<br>Length (aa) | Pseudomolecule Position | pI      | Mol.<br>Wt. (Da) |
|----------------|---------|--------------------|------------------------|-------------------------|---------|------------------|
| LOC_Os01g70110 | ONAC041 | 687                | 229                    | 40571894–40572673       | 9.0865  | 24504.6          |
| LOC_Os09g32040 | ONAC042 | 2109               | 703                    | 19124534–19121884       | 4.6148  | 77265.1          |
| LOC_Os02g06950 | ONAC043 | 1512               | 504                    | 3529541–3522907         | 7.3686  | 57370.9          |
| LOC_Os02g18460 | ONAC044 | 1512               | 504                    | 10749004–10747493       | 3.8303  | 56826.5          |
| LOC_Os11g03370 | ONAC045 | 1080               | 360                    | 1268472–1269848         | 7.2499  | 39688.4          |
| LOC_Os02g18470 | ONAC046 | 1677               | 559                    | 10754223–10752547       | 4.4871  | 60250.4          |
| LOC_Os08g02160 | ONAC049 | 1005               | 335                    | 731319–733595           | 10.6566 | 36371.9          |
| LOC_Os02g38130 | ONAC050 | 1182               | 394                    | 23060334–23057308       | 5.4359  | 43588.6          |
| LOC_Os02g41450 | ONAC051 | 759                | 253                    | 24846732–24819818       | 9.3953  | 27232.3          |
| LOC_Os02g42970 | ONAC052 | 1113               | 371                    | 25855114–25853635       | 6.9409  | 41171            |
| LOC_Os02g51120 | ONAC053 | 1161               | 387                    | 31274715–31277298       | 8.3742  | 43414.02         |
| LOC_Os03g02800 | ONAC054 | 1953               | 651                    | 1088451–1092408         | 6.4741  | 72833.2          |
| LOC_Os03g01870 | ONAC055 | 894                | 298                    | 523094–524181           | 6.0358  | 34031.9          |
| LOC_Os03g03540 | ONAC056 | 1101               | 367                    | 1530620–1528263         | 5.4804  | 40399.9          |
| LOC_Os03g12120 | ONAC057 | 2661               | 887                    | 6364595–6357413         | 5.0466  | 99173.6          |
| LOC_Os03g21060 | ONAC058 | 1179               | 393                    | 11974928–11973139       | 8.5836  | 42195.4          |
| LOC_Os01g64310 | ONAC059 | 771                | 257                    | 37333473–37334807       | 5.1885  | 28275.4          |
| LOC_Os12g41680 | ONAC060 | 1002               | 334                    | 25767557–25772636       | 8.9766  | 36341.1          |
| LOC_Os10g21560 | ONAC061 | 1182               | 394                    | 10968129–10964968       | 4.6984  | 43648.7          |
| LOC_Os05g48850 | ONAC062 | 945                | 315                    | 27940851–27942092       | 9.4414  | 34100.3          |
| LOC_Os08g33910 | ONAC063 | 1158               | 386                    | 21215638–21217230       | 8.2696  | 43336.6          |
| LOC_Os03g39050 | ONAC064 | 1329               | 443                    | 21706809–21708250       | 3.8482  | 47292.7          |
| LOC_Os07g27330 | ONAC065 | 2331               | 777                    | 15901059–15898729       | 3.8532  | 82292.4          |
| LOC_Os03g56580 | ONAC066 | 1089               | 363                    | 32227328–32229113       | 6.8387  | 40558.4          |
| LOC_Os03g39100 | ONAC069 | 1503               | 501                    | 21724668–21726170       | 3.913   | 53942            |
| LOC_Os02g57650 | ONAC070 | 1899               | 633                    | 35297610–35301021       | 4.3167  | 69559.4          |
| LOC_Os03g59730 | ONAC071 | 1491               | 497                    | 34005662–34003039       | 8.5555  | 53563.9          |
| LOC_Os09g32260 | ONAC072 | 1059               | 353                    | 19255969–19253152       | 9.6575  | 39127.7          |
| LOC_Os01g48130 | ONAC073 | 1008               | 336                    | 27560681–27556008       | 9.0816  | 36302.7          |
| LOC_Os01g66490 | ONAC075 | 1359               | 453                    | 38611435–38614057       | 9.0804  | 48535            |
| LOC_Os03g61249 | ONAC076 | 951                | 317                    | 34783894–34784844       | 4.429   | 33994.6          |
| LOC_Os03g61319 | ONAC077 | 951                | 317                    | 34815087–34814137       | 4.429   | 33994.6          |
| LOC_Os03g62470 | ONAC078 | 396                | 132                    | 35378425–35378030       | 9.5997  | 14594.4          |
| LOC_Os04g35660 | ONAC079 | 603                | 201                    | 21733623–21734709       | 5.7758  | 22517.2          |
| LOC_Os04g39960 | ONAC080 | 849                | 283                    | 23789421–23790269       | 4.026   | 31081.4          |
| LOC_Os04g40140 | ONAC081 | 627                | 209                    | 23889226–23885498       | 4.1484  | 23131.6          |
| LOC_Os04g45340 | ONAC082 | 579                | 193                    | 26806613–26804262       | 5.4482  | 21070.6          |
| LOC_Os04g52810 | ONAC083 | 852                | 284                    | 31443397–31439595       | 9.8768  | 30939.6          |
| LOC_Os04g59470 | ONAC084 | 858                | 286                    | 35359459–35358602       | 6.3361  | 31658.5          |
| LOC_Os05g10620 | ONAC085 | 1074               | 358                    | 5788137–5784141         | 9.655   | 39112.1          |
| LOC_Os05g25960 | ONAC086 | 1704               | 568                    | 15089885–15091588       | 3.7817  | 60360.6          |
| LOC_Os05g34600 | ONAC087 | 1254               | 418                    | 20518998–20516305       | 6.7218  | 44660.6          |
| LOC_Os05g34830 | ONAC088 | 969                | 323                    | 20678001–20680343       | 8.5611  | 34595.2          |
| LOC_Os05g43960 | ONAC089 | 1485               | 495                    | 25581765–25580132       | 6.5105  | 54052.8          |

Supplementary File 6. *Cont.*

| Locus          | Name    | ORF<br>Length (bp) | Protein<br>Length (aa) | Pseudomolecule Position | pI      | Mol.<br>Wt. (Da) |
|----------------|---------|--------------------|------------------------|-------------------------|---------|------------------|
| LOC_Os06g01480 | ONAC090 | 1095               | 365                    | 294071–289311           | 6.8291  | 41570.2          |
| LOC_Os06g15690 | ONAC091 | 1257               | 419                    | 8879085–8883818         | 4.9322  | 46875.17         |
| LOC_Os06g23650 | ONAC092 | 1122               | 374                    | 13804017–13805815       | 8.8051  | 39174.2          |
| LOC_Os06g36480 | ONAC094 | 1704               | 568                    | 21421990–21414174       | 7.6262  | 61990.6          |
| LOC_Os06g51070 | ONAC095 | 879                | 293                    | 30894523–30893477       | 8.208   | 32961.4          |
| LOC_Os07g04560 | ONAC096 | 1032               | 344                    | 2023158–2025061         | 4.8438  | 37925.3          |
| LOC_Os07g09740 | ONAC097 | 1995               | 665                    | 5189805–5191799         | 3.8664  | 69835.8          |
| LOC_Os07g09830 | ONAC098 | 2121               | 707                    | 5230976–5228856         | 3.8305  | 74581.8          |
| LOC_Os07g09860 | ONAC099 | 2037               | 679                    | 5246674–5244638         | 3.7749  | 71427.5          |
| LOC_Os07g13920 | ONAC100 | 1125               | 375                    | 7957180–7956056         | 4.1254  | 40338.6          |
| LOC_Os07g17180 | ONAC101 | 1818               | 606                    | 10109609–10111749       | 3.7925  | 64333.4          |
| LOC_Os07g27340 | ONAC102 | 1914               | 638                    | 15906886–15908799       | 3.9196  | 68294.2          |
| LOC_Os07g48450 | ONAC103 | 1041               | 347                    | 28985797–28988032       | 7.3901  | 37533.5          |
| LOC_Os08g10080 | ONAC104 | 882                | 294                    | 5850647–5846863         | 8.5858  | 32201.6          |
| LOC_Os08g23880 | ONAC105 | 1344               | 448                    | 14454209–14455552       | 4.574   | 49725.8          |
| LOC_Os08g33670 | ONAC106 | 1005               | 335                    | 21028959–21025544       | 5.635   | 36651.4          |
| LOC_Os08g40030 | ONAC107 | 1023               | 341                    | 25353753–25351524       | 7.2318  | 36957.8          |
| LOC_Os09g24560 | ONAC108 | 903                | 301                    | 14619069–14617482       | 6.1276  | 32301.8          |
| LOC_Os09g38000 | ONAC109 | 1101               | 367                    | 21902714–21905059       | 4.9939  | 40137.1          |
| LOC_Os09g38010 | ONAC110 | 657                | 219                    | 21907637–21910215       | 7.3004  | 25268.4          |
| LOC_Os10g09820 | ONAC111 | 1491               | 497                    | 5318635–5314994         | 4.3715  | 55433.9          |
| LOC_Os10g25620 | ONAC112 | 1599               | 533                    | 13272947–13270789       | 4.7697  | 57452.2          |
| LOC_Os10g25630 | ONAC113 | 780                | 260                    | 13278980–13277838       | 3.7944  | 27484.9          |
| LOC_Os10g25640 | ONAC114 | 588                | 196                    | 13280721–13279353       | 10.7103 | 21919.3          |
| LOC_Os10g26240 | ONAC115 | 519                | 173                    | 13592052–13592674       | 10.6411 | 19373.3          |
| LOC_Os10g26250 | ONAC116 | 549                | 183                    | 13593467–13594281       | 4.1862  | 19923.9          |
| LOC_Os10g26270 | ONAC117 | 660                | 220                    | 13597984–13599963       | 3.4994  | 22589.3          |
| LOC_Os10g27360 | ONAC118 | 1266               | 422                    | 14436872–14438849       | 5.8521  | 44968.9          |
| LOC_Os10g27390 | ONAC119 | 1632               | 544                    | 14446549–14448670       | 7.5557  | 56440.7          |
| LOC_Os10g33760 | ONAC120 | 975                | 325                    | 17849088–17851397       | 5.6091  | 35637            |
| LOC_Os10g42130 | ONAC121 | 990                | 330                    | 22669292–22671877       | 6.0989  | 35994.7          |
| LOC_Os11g03300 | ONAC122 | 1176               | 392                    | 1233928–1236052         | 6.5683  | 43336.3          |
| LOC_Os11g03310 | ONAC123 | 867                | 286                    | 1240058–1245394         | 8.2112  | 32169.6          |
| LOC_Os11g04470 | ONAC124 | 1077               | 359                    | 1866995–1865567         | 4.2699  | 38932.3          |
| LOC_Os11g04960 | ONAC125 | 1356               | 452                    | 2124798–2126649         | 4.3665  | 50632.3          |
| LOC_Os11g07700 | ONAC126 | 804                | 268                    | 3930937–3930134         | 9.2053  | 28532.7          |
| LOC_Os11g31340 | ONAC127 | 834                | 278                    | 18294409–18296934       | 6.5818  | 30334.2          |
| LOC_Os11g31360 | ONAC128 | 873                | 291                    | 18301326–18303603       | 9.3513  | 32255.2          |
| LOC_Os11g31380 | ONAC129 | 723                | 241                    | 18311804–18313703       | 6.5016  | 26253.9          |
| LOC_Os11g45950 | ONAC130 | 411                | 137                    | 27804967–27804177       | 9.4699  | 15533.5          |
| LOC_Os12g03040 | ONAC131 | 1182               | 394                    | 1139026–1141362         | 6.6421  | 43589.7          |
| LOC_Os12g03050 | ONAC132 | 1191               | 397                    | 1146995–1148742         | 9.1777  | 43848.1          |
| LOC_Os12g04230 | ONAC133 | 1098               | 366                    | 1791193–1790084         | 4.3027  | 39587.4          |
| LOC_Os12g05990 | ONAC134 | 9024               | 308                    | 2762322–2763606         | 7.1786  | 32505.3          |



Supplementary File 6. *Cont.*

| Locus          | Name    | ORF<br>Length (bp) | Protein<br>Length (aa) | Pseudomolecule Position | pI      | Mol.<br>Wt. (Da) |
|----------------|---------|--------------------|------------------------|-------------------------|---------|------------------|
| LOC_Os12g07790 | ONAC135 | 1716               | 572                    | 3938092–3936377         | 4.6271  | 60152.9          |
| LOC_Os12g22630 | ONAC136 | 1413               | 471                    | 12786650–12788062       | 5.0387  | 50829.5          |
| LOC_Os12g22940 | ONAC137 | 1254               | 418                    | 12971077–12972330       | 5.8881  | 44398.2          |
| LOC_Os12g23090 | ONAC138 | 1215               | 405                    | 13054197–13055584       | 6.5149  | 43811.6          |
| LOC_Os12g29330 | ONAC139 | 783                | 261                    | 17391342–17392732       | 9.9389  | 28012.5          |
| LOC_Os12g43530 | ONAC140 | 1128               | 376                    | 27009616–27007586       | 7.6376  | 41331            |
| LOC_Os01g47670 | ONAC141 | 1095               | 365                    | 27270375–27269167       | 6.7948  | 40538.3          |
| LOC_Os03g61650 | ONAC142 | 1095               | 365                    | 34945841–34946935       | 4.4502  | 38297            |
| LOC_Os04g42940 | ONAC143 | 1188               | 396                    | 25401527–25400256       | 8.1485  | 43979.4          |
| LOC_Os05g26026 | ONAC144 | 963                | 321                    | 15159435–15158473       | 7.1051  | 34617.8          |
| LOC_Os05g26049 | ONAC145 | 963                | 321                    | 15127611–15128573       | 7.1051  | 34617.8          |
| LOC_Os05g27749 | ONAC146 | 1218               | 406                    | 16456152–16454935       | 8.2226  | 43447.4          |
| LOC_Os05g28129 | ONAC147 | 1218               | 406                    | 16397417–16398634       |         |                  |
| LOC_Os07g31410 | ONAC148 | 636                | 212                    | 18606147–18606782       | 10.0233 | 22050.9          |
| LOC_Os10g27380 | ONAC149 | 1128               | 376                    | 14443785–14445504       | 4.8979  | 40454.5          |
| LOC_Os11g04360 | ONAC150 | 1248               | 438                    | 1811713–1813623         | 6.8707  | 46125.2          |
| LOC_Os11g31370 | ONAC151 | 381                | 127                    | 18307265–18308037       | 8.1475  | 14458.6          |

The locus ID, gene name, open reading frame, protein length, pseudo molecule position, pI and Mol weight (Da) of the *ONAC* genes are given.

**Supplementary File 7.** Sequences of *ONAC* genes. The genomic sequence, cDNA sequence and protein sequence of the *ONAC* genes are obtained from Rice genome annotation project (<http://rice.plantbiology.msu.edu>).

#### **LOC\_Os03g60080 (SNAC1) sequence information**

**Genomic sequence length:** 1448 nucleotides

**CDS length:** 951 nucleotides

**Protein length:** 316 amino acids

**Putative Function:** NAC domain-containing protein 67, putative, expressed

#### Genomic Sequence

##### > **SNAC1**

```
CATTCGAGAAATCCCTCACAACCCACAACATTTTCAAACAACGCAAAGCAGTAGCAGCAG
CGAGAAGCAAGCAAGAAGCGATGGGGATGGGGATGAGGAGGGAGAGGGACGCGGAGGCGG
AGCTGAACCTGCCGCCGGGGTTCAGGTTCCACCCACGGACGACGAGCTGGTGGAGCACT
ACCTGTGCAGGAAGGCGGCGGGGCGAGCGCCTGCCGGTGCCGATCATCGCCGAGGTGGATC
TCTACAAGTTCGACCCGTGGGATCTGCCCGAGCGCGCGCTGTTCCGGCGCCAGGGAGTGGT
ACTTCTTCACCCCGCGGGATCGCAAGTATCCTAATGGGTCACGCCCCAACCGCGCCGCCG
GCAACGGGTACTGGAAGGCCACCGGCGCCGACAAGCCCGTCGCGCCGCGGGGCGCACGC
TTGGGATCAAGAAGGCGCTCGTGTCTACGCCGGCAAGGCGCCGCGAGGGGTCAAGACTG
ATTGGATCATGCATGAGTACCGGCTCGCCGATGCTGGCCGCGCCGCGCGGGCGCCAAGA
AGGGATCTCTCAGGGTAAGCTTAGCTCAGATTCATCCGAATTACTAGCAATGATCCTTGC
TTCGATCGAAGATTATTCGGTGGGAGTGATGATCGATAATTGGATCGTGGTCTGATCTGA
TCTGGTGTGAATTGTTTGTGCAAGTTGGATGATTGGGTGCTGTGTGCGGCTGTACAACAAGA
AGAACGAGTGGGAGAAGATGCAGCAGGGGAAGGAGGTGAAGGAGGAGGCGTCCGACATGG
TTACGTCGCAGTCGCACTCGCACACCCACTCGTGGGGCGAGACGCGCACGCCGAGTCGG
AGATCGTGGACAACGACCCCTTCCCGGAGCTGGACTCGTTCCCGGCGTTCCAGCCTGCGC
CGCCGCCGGCGACGGCGATGATGGTGCCCAAGAAAGAATCGATGGACGACGCCACCGCGG
CCGCCGCCGCCGCCGCCACCATCCCCAGGAACAACAGCAGCCTGTTTCGTGGACCTGAGCT
ACGACGATATCCAGGGCATGTACAGCGGCTCGACATGCTGCCGCCGGGCGACGACTTCT
ACTCGTCGCTCTTCGCGTCGCCGCGGGTGAAGGGGACGACGCCACGCGCCGGCGCCGGCA
TGGGCATGGTCCCGTTCTGAGGTGACGGCGACGCGATCGAACAGGTGGTGATCGATGCTG
CAACGTGTGTAAATATACAGCGCCGGCTGGGTCAAGAGATGGCTCGGGTGACGCGCGCGC
GGCGTGTCTTGGCGTTGGCGCCGGGGCATTTCTTTAGTTTTTCATCTTTTCATCATCTCAG
ATGGTAGATACAAAACAGTGTATGTATGTAGCTCTGTTTCTCTCTATAGAACCCCAACAA
ATTTTGTGTGTTGATGTTGTTTATCTTCATATGCTTTGATCTTGAAATCGTCTACCTTACT
ACTGCCGA
```

#### CDS

##### > **SNAC1**

```
ATGGGGATGGGGATGAGGAGGGAGAGGGACGCGGAGGCGGAGCTGAACCTGCCGCCGGGG
TTCAGGTTCCACCCACGGACGACGAGCTGGTGGAGCACTACCTGTGCAGGAAGGCGGCG
GGGCAGCGCCTGCCGGTGCCGATCATCGCCGAGGTGGATCTCTACAAGTTCGACCCGTGG
```

GATCTGCCCCGAGCGCGCGCTGTTTCGGCGCCAGGGAGTGGTACTTCTTCACCCCGCGGGAT  
CGCAAGTATCCTAATGGGTACGCCCCAACCGCGCCGCCGGCAACGGGTACTGGAAGGCC  
ACCGGCGCCGACAAGCCCGTTCGCGCCGCGGGGGCGCACGCTTGGGATCAAGAAGGCGCTC  
GTGTTCTACGCCGGCAAGGCGCCGCGAGGGGTCAAGACTGATTGGATCATGCATGAGTAC  
CGGCTCGCCGATGCTGGCCGCGCCGCCGCGGGCGCCAAGAAGGGATCTCTCAGGTTGGAT  
GATTGGGTGCTGTGTCTGGCTGTACAACAAGAAGAACGAGTGGGAGAAGATGCAGCAGGGG  
AAGGAGGTGAAGGAGGAGGCGTCCGACATGGTTACGTCGCAGTCGCACTCGCACACCCAC  
TCGTGGGGCGAGACGCGCACGCCGGAGTCGGAGATCGTGGACAACGACCCCTTCCCGGAG  
CTGGACTCGTTCCCGGCGTTCCAGCCTGCGCCGCCGCCGGCGACGGCGATGATGGTGCCC  
AAGAAAGAATCGATGGACGACGCCACCGGGCCGCCGCCGCCGCCACCATCCCCAGG  
AACAAACAGCAGCCTGTTCTGTGGACCTGAGCTACGACGATATCCAGGGCATGTACAGCGGC  
CTCGACATGCTGCCGCCGGGCGACGACTTCTACTCGTCGCTCTTCGCGTCGCCGCGGGTG  
AAGGGGACGACGCCACGCGCCGGCGCCGGCATGGGCATGGTCCCGTTCTGA

## Protein

## > SNAC1

MGMGMRRERDAEAE LNLPPGFRFHPTDDELVEHYLCRKAAGQRLPVPIIAEVDLYKFDPW  
DLPERALFGAREWYFFTPRDRKYPNGSRPNRAAGNGYWKATGADKPVAPRGRTLGIKKAL  
VFYAGKAPRGVKTDWIMHEYRLADAGRAAAGAKKGSRLDDWVLCRLYNKKNEWEKMQQG  
KEVKEEASDMVTSQSHSHTHSWGETRTPESEIVDNDPFPPELDSFPAFQPAPPPATAMMVP  
KKESMDDATAAAAAAATIPRNNSSLFVDLSYDDIQGMYSGLDMLPPGDDFYSSSLFASPRV  
KGTTPRAGAGMGMVPPF\*

## Gene Structure

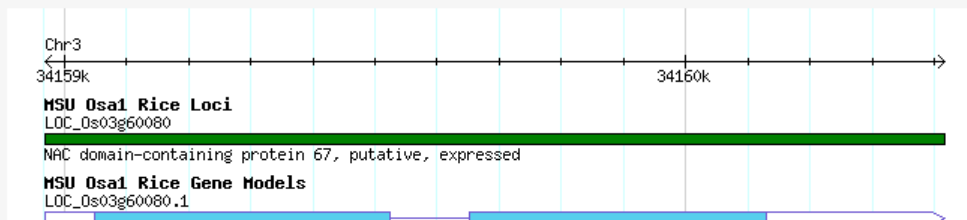

### LOC\_Os02g36880 (OsNAC1) sequence information

**Genomic sequence length:** 1849 nucleotides

**CDS length:** 1125 nucleotides

**Protein length:** 374 amino acids

**Putative Function:** No apical meristem protein, putative, expressed

## Genomic Sequence

## > OsNAC1

[illegible]

TAGATGCGATTAGCCAGGCAGCAGCAGCAGGTGGTGGTGGCTGCGACGATGGAGCATGAC  
 GTGCACCAACCACCGGCAGATGATGCAGCAGCAGCAGCAGCAGGAGATGGACCTGCCGCCG  
 GGCTTCCGGTTCCACCCACCGACGAGGAGCTCATCACGCACTACCTCCTCCGCAAGGCC  
 GCCGACCCCGCCGGGTTCCGCCGCGCGCCGTCGGAGAGGCCGACCTCAACAAGTGCAG  
 CCATGGGACCTGCCATGTAAGCCAAGCTTAGCTAGCTACTCTCGATCTCTCTCAAGTCTC  
 AAACAGTCGCGCTACGTATGATCGCTAGTGAGTAGTACTAGGTTTGATTTTTCATGTGA  
 TTTATGGGGGTGATCAGAGATGTGTGTGTACGTGTGCGCATGCAGCGAGGGCGACGATGG  
 GGGAGAAGGAGTGGTACTTCTTCTGCGTGAAGGACCGGAAGTACCCGACGGGGCTGAGGA  
 CGAACAGGGCGACGGAGTCCGGGTACTGGAAGGCGACGGGGAAGGACCGGGAGATCTTCA  
 GGGGGAAGGCCCTCGTCGGCATGAAGAAGACGCTCGTCTTCTACACCGGGAGGGCCCCC  
 GCGGCGCAAGACCGGATGGGTATGCACGAGTACCGCATCCACGGCAAGCACGCCGCCG  
 CCAATTCCAAGGTACGTACGTGAGCGTTGATTTGGTTGCACGCGCGCGGTTCTGTGTG  
 CCATGTCGCGATCTGATGGGTGGTCTGGTTGGTTGGGTGCAGCAGGATCAGGAGTGGGTG  
 CTGTGCAGGGTGTTCAGAAGAGCCTCGAGCTGGCGCCGGCGGGCGGGCGGGCGGTCTGGC  
 AGGAGAGGCGCGGGCGCGGGACGGACGTTGGGCCGTCGTCGATGCCCATGGCGGACGAC  
 GTCGTGCGCCTCGCCCCGTGCGCGCTCCCGCCGCTGATGGACGTGTCTGGCGGGCGGGT  
 GCGGCCGGCACAACCTCGCTGTCAGCGACCGCGGGCGGGCGGGCGGGCGGCCGCCAGCG  
 CACGTGACCTGCTTCTCCAACGCGCTGGAGGGCCAGTTCCTGGACACACCGTACCTCCTC  
 CCCGCCCGGATCCCGCGGATCACCTCGCCATGTCTCCGCCTCGCCGTTCTTGAGGCC  
 CTGCAGATGCAGTACGTCCAGGACGCCGCCGCCGGAGGAGCGGGCATGGTGCACGAG  
 CTGCTCATGGGCGGCGGCTGGTATTGCAACAAGGGCGAGAGGGAGAGGCTGAGCGGCGCC  
 TCGCAGGACACCGGCTCACGTGTCGGAGGTGAACCCCGGCGAGATCTCGTCGTCGTCG  
 CGGCAGCAACGCATGGATCATCACGACGCGTCCCTCTGGGCCTATTGAAATATTCATTCA  
 TCATCATTGAAAATTGCATTAGCCATTATTATTAGTACTGTTGGCCACCGATTATTGATT  
 GTGTTGTAATATTGGTATTGTTGATTATAATTAATTAGTACGCCAAAGAGACAAATCACA  
 AGAGAACGAAGTGTGTATGCTGTAGATTAATTCCGTATGTTTGTGAAAATATTCTTGAAC  
 CCAAGTGAATGTTACTAGTGCTTTTCAGATGCTCATGTTTGGAGCGCCG

CDS

#### > **OsNAC1**

ATGCGATTAGCCAGGCAGCAGCAGCAGGTGGTGGTGGCTGCGACGATGGAGCATGACGTG  
 CACCACCACCGGCAGATGATGCAGCAGCAGCAGCAGCAGGAGATGGACCTGCCGCCGGGC  
 TTCCGGTTCCACCCACCGACGAGGAGCTCATCACGCACTACCTCCTCCGCAAGGCCGCC  
 GACCCCGCCGGGTTCCGCCGCGCGCCGTCGGAGAGGCCGACCTCAACAAGTGCAGCCA  
 TGGGACCTGCCATCGAGGGCGACGATGGGGGAGAAGGAGTGGTACTTCTTCTGCGTGAAG  
 GACCGGAAGTACCCGACGGGGCTGAGGACGAACAGGGCGACGGAGTCCGGGTACTGGAAG  
 GCGACGGGGAAGGACCGGGAGATCTTCAGGGGGAAGGCCCTCGTCGGCATGAAGAAGACG  
 CTCGTCTTCTACACCGGGAGGGCCCCCGCGGCGCAAGACCGGATGGGTATGCACGAG  
 TACCGCATCCACGGCAAGCACGCCGCCGCAATTCCAAGCAGGATCAGGAGTGGGTGCTG  
 TGCAGGGTGTTCAGAAGAGCCTCGAGCTGGCGCCGGCGGGCGGGCGGGCGGGTCTGGCAGG  
 AGAGGCGCGGGCGCGGGACGGACGTTGGGCCGTCGTCGATGCCCATGGCGGACGACGTC  
 GTCGGCCTCGCCCCGTGCGCGCTCCCGCCGCTGATGGACGTGTCTGGCGGCGGGCGGTGGC  
 GCCGGCACAACCTCGCTGTCAGCGACCGCGGGCGGGCGGGCGGGCGGGCGGCCAGCGCAC  
 GTGACCTGCTTCTCCAACGCGCTGGAGGGCCAGTTCCTGGACACACCGTACCTCCTCCCC  
 GCCGCCGATCCCGCGGATCACCTCGCCATGTCTCCGCCTCGCCGTTCTTGAGGCCCTG

CAGATGCAGTACGTCCAGGACGCCGCCGCCGCCGAGGAGCGGGCATGGTGCACGAGCTG  
 CTCATGGGCGGCGGCTGGTATTGCAACAAGGGCGAGAGGGAGAGGCTGAGCGGCGCCTCG  
 CAGGACACCGGCCTCACGTCGTCGGAGGTGAACCCCGGCGAGATCTCGTCGTCGTCGCGG  
 CAGCAACGCATGGATCATCACGACGCGTCCCTCTGGGCCTATTGA

Protein

#### > **OsNAC1**

MRLARQQQVVVAATMEHDVHHHRQMMQQQQQEMDLPPGFRFHPTDEELITHYLLRKA  
 DPAGFAARAVGEADLNKCEPWLPSRATMGEKEWYFFCVKDRKYPTGLRTNRATESGYWK  
 ATGKDREIFRGKALVGMKKTLLVFYTGRAPRGGKTGWMHEYRIHGKHAAANSKQDQEWL  
 CRVFKKSLELAPAAAAAVGRRGAGAGTDVGPSSMPMADDVVLAPCALPPLMDVSGGGG  
 AGTTSLSATAGAAAAPPAHVTCFSNALEGQFLDTPYLLPAADPADHLAMSSASPFLEAL  
 QMQYVQDAAAAGGAGMVHELLMGGGWYCNKGERERLSGASQDTGLTSSEVNPGEISSSR  
 QQRMDDHHDASLWAY\*

#### Gene Structure

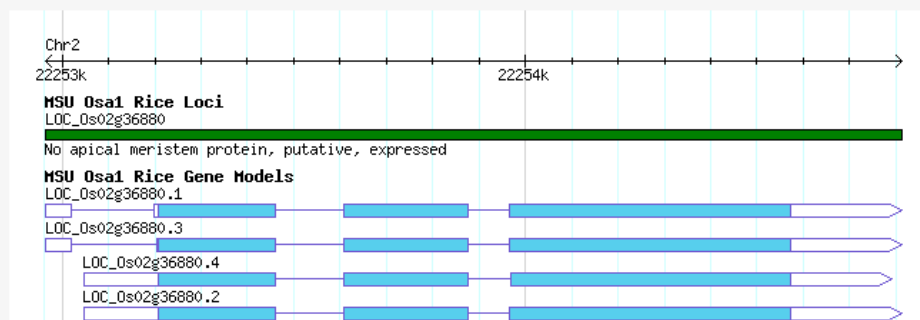

#### **LOC\_Os04g38720 (OsNAC2) sequence information**

**Genomic sequence length:** 2189 nucleotides

**CDS length:** 1032 nucleotides

**Protein length:** 343 amino acids

**Putative Function:** no apical meristem protein, putative, expressed

Genomic Sequence

#### > **OsNAC2**

TATTTCTCTATACAACGATTTCTCTTGTACCCTGAATCTACTTCTGCTGCAAAGGT  
 AATTAGCATATCCTAACTATTTATCACCTCATCCCTCAAGTGTGTTCTTCTACTTTCTTA  
 GATGTACTTTTTAACTTTTCTGTGCATAAACATCTCATGTGCTGATTCTTTTTGTGTGT  
 TCTATGTGCTTGCATACCATGTCCGTTTGGTTCGATTCTGATTTTTTAAGCATCCGTGTGG  
 TTTGTTTTTGTCTAGCTTAGCTAGCTAGCTAGCAAAGAGGTGTCATGGATACATACCAG  
 CTTTAATTTGATTTGGTTTGTCTACCTTTAAAAGTGTGTGAATCATCTCCGGTCCTAGT  
 TTATGCATATCTGTGTGCATATGTACAAATGTTTCAGGACAGGAGTTGGCATAACAGCTA  
 ACAAATCTTACATATATAGCAGCAATAAGCAAGGAGCAGTTAGCCAGGTAAAGCTCTAGC  
 TAGCTAGCTTAGGCAGCAATGGAGCAGCATCAGGGCCAGGCAGGCATGGACTTGCCCCCT  
 GGCTTCGCTTCCACCCGACCGACGAGGAGCTGATCACGCACTACCTCGCCAAGAAGGTC

GCCGACGCCCGCTTCGCCGCCCTCGCCGTCGCCGAGGCCGACCTCAACAAGTGCAGAGCCC  
 TGGGACCTGCCATGTAAGCAACCTCTCCTCTACTTAATTACCTCTGCAATCTGCATGCAG  
 TGATGAACTGATGATTGATATATACATGGATCATTGGATTGGCTAGCTAGCTAACATCTG  
 TTGATGCTGCGATGGAATTATTGGCAGCTCTGGCGAAGATGGGGGAGAAGGAGTGGTACT  
 TCTTCTGCCTCAAGGACAGGAAGTACCCGACGGGGCTGAGGACGAACAGGGCGACGGAGT  
 CCGGGTACTGGAAGGCCACGGGGAAGGACAAGGACATCTTCAGACGGAAGGCCCTCGTCCG  
 GCATGAAGAAGACGCTCGTTTTCTACACGGGGCGCGCTCCCAAGGGGGAGAAGTCTGGCT  
 GGGTCATGCACGAGTACCGCTCCACGGCAAGCTCCACGCCGCCGCCCTCGGCTTCCTCC  
 ACGGCAAGCCCGCGTCGTCCAAGGTACACGAACGCACGTACGCCGCGTGCCTGTGTTTGG  
 TTGTGACCAGTTTGATCGATCGATCGATCGATCGATTGAGCAGGCCGACTGACACGCCG  
 TGGGTTTTTCTTGTGGTGGTAGAACGAGTGGGTGTTGTGCAGGGTGTTCAGAAGAGC  
 CTCGTGGAGGTGGGCGCGGCGGGAGGGAAGAAGGCGGCCGTGGTGACGATGGAGATGGCG  
 AGGGGAGGGTCGACGTCGTCCGTGGCGGACGAGATCGCCATGTCGTCCGTCTGTCCTC  
 CCTCCGCTGATGGACATGTCCGGAGCCGGCGCCGGCGCCGTCGACCCGGCGACGACGGCG  
 CACGTGACCTGCTTCTCCAACGCGCTGGAGGGCCAGTTCTTTAACCCGACGGCAGTACAC  
 GGGCACGGCGCGGCGACTCCTCGCCGTTTCATGGCGAGCTTCACGCAGTACGGGCAGCTG  
 CACCACGGCGTGAGCCTGGTGCAACTCCTGGAGAGCTGCAACGGCTACGGCGGCCTCGTC  
 GACATGGCAGCGTCCGGCAGCCAGCTGCAGCCGGCGGCGTGCGGCGGCGAGCGGGAGAGG  
 CTTAGCGCGTCGCAGGACACCGGCCCTCACCTCCGACGTGAACCCGAGATCTCGTCATCC  
 TCCGGCCAAAAATTGACCACGAGGCCGCGCTATGGGGCTACTAAGGTTTGATATGATCA  
 GCGCCGTGTACGTTAATCGCGGGCGATTAGCGAAGTAGCGATTACTGTAAATAAAACCAT  
 GAGATCGCGATCGAGGCATCTACCAAGGTTTCGCTTAATTTGCTTGTACCTATAGGTGTAG  
 ATTATTTGGTGATTTGGGAGATGTAATTAGCATTGTTTGTGTTGTAATTCGTATCAGAATG  
 ATCGATGCAGTATTGTTTGGAGGGTAGTTAAGCAATTGGCCACTCCTCAGTTGCCAGTT  
 AATTAGTTAGAGTTGCTTAATTTAGCTCTTTCTAAAAAGCTAGCAGAGACTAATAGCTAA  
 CTGTGATCTCATCTGAACCTAAAAAGTTTGACCTGCTGTGTGATATAGTAGCTGGTACCA  
 TCAGCTATAGCTAATCTAGCATTTAAAGC

CDS

### > **OsNAC2**

ATGGAGCAGCATCAGGGCCAGGCAGGCATGGACTTGCCCCCTGGCTTCCGCTTCCACCCG  
 ACCGACGAGGAGCTGATCACGCACTACCTCGCCAAGAAGTTCGCCGACGCCCGCTTCGCC  
 GCCCTCGCCGTCGCCGAGGCCGACCTCAACAAGTGCAGAGCCCTGGGACCTGCCATCTCTG  
 GCGAAGATGGGGGAGAAGGAGTGGTACTTCTTCTGCCTCAAGGACAGGAAGTACCCGACG  
 GGGCTGAGGACGAACAGGGCGACGGAGTCCGGGTACTGGAAGGCCACGGGGAAGGACAAG  
 GACATCTTCAGACGGAAGGCCCTCGTCGGCATGAAGAAGACGCTCGTTTTCTACACGGGG  
 CGCGCTCCCAAGGGGGAGAAGTCTGGCTGGGTTCATGCACGAGTACCGCCTCCACGGCAAG  
 CTCCACGCCGCCGCCCTCGGCTTCCTCCACGGCAAGCCCGCGTCGTCCAAGAACGAGTGG  
 GTGTTGTGCAGGGTGTTCAGAAGAGCCTCGTGGAGGTGGGCGCGGCGGGAGGGAAGAAG  
 GCGGCCGTGGTGACGATGGAGATGGCGAGGGGAGGGTCGACGTCGTTCGTCCGTGGCGGAC  
 GAGATCGCCATGTCGTCCGTCTGTCCTCCCTCCGCTGATGGACATGTCCGGAGCCGGCGCC  
 GCGGCCGTGACCCGGCGACGACGGCGCACGTGACCTGCTTCTCCAACGCGCTGGAGGGC  
 CAGTTCTTTAACCCGACGGCAGTACACGGGCACGGCGGCGGCGACTCCTCGCCGTTTCATG  
 GCGAGCTTCACGCAGTACGGGCAGCTGCACCACGGCGTGAGCCTGGTGCAACTCCTGGAG  
 AGCTGCAACGGCTACGGCGGCCCTCGTCGACATGGCAGCGTCCGGCAGCCAGCTGCAGCCG

GCGGCGTGCGGCGGCGAGCGGGAGAGGCTTAGCGCGTCGCAGGACACCGGCCTCACCTCC  
 GACGTGAACCCGGAGATCTCGTCATCCTCCGCCAAAAATTCGACCACGAGGCCGCGCTA  
 TGGGGCTACTAA

#### Protein

##### > **OsNAC2**

MEQHQQGAGMDLPPGFRFHPTDEELITHYLAKKVADARFAALAVAEADLNKCEPWLPSL  
 AKMGEKEWYFFCLKDRKYPTGLRTNRATESGYWKATGKDKDIFRRKALVGMKKTLYFYTG  
 RAPKGEKSGWVMHEYRLHGKLHAAALGFLHGKPASSKNEWVLCRVFKKSLVEVGAAGGKK  
 AAVVTMEMARGGSTSSSVADEIAMSSVVLPLMDMSGAGAGAVDPATTAHVTCFSNALEG  
 QFFNPTAVHGHGGDSSPFMASFTQYGQLHHGVSLVQLLESCNGYGGLVDMAASGSQLQP  
 AACGGERERLSASQDTGLTSDVNPEISSSSGQKFDHEAALWGY\*

#### Gene Structure

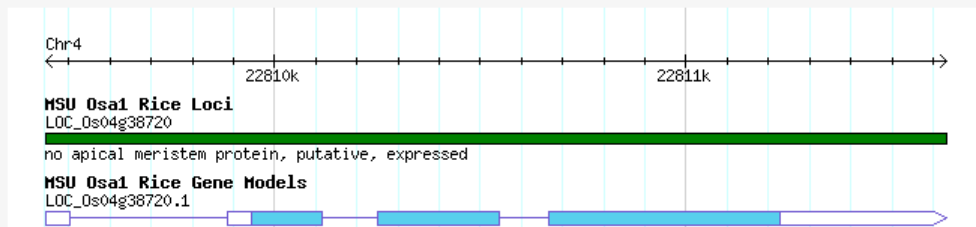

#### LOC\_Os07g12340 (OsNAC3) sequence information

**Genomic sequence length:** 1313 nucleotides

**CDS length:** 831 nucleotides

**Protein length:** 276 amino acids

**Putative Function:** NAC domain-containing protein 67, putative, expressed

#### Genomic Sequence

##### > **OsNAC3**

ACATCCAACAACCCACCAACCCTCATTCCTCAAGTCCCAAGATCGAACACCTCGTGTCCA  
 TGGCGGCGGCGAAGCGGCGAGTGCAGCGACGCGGAGGCGGACCTGAACCTCCCGCCGGGCT  
 TCCGCTTCCACCCACCGACGAGGAGCTGGTGGCGCACTACCTCTGCCCAGCGCGCCGCGG  
 GCCGCGCCGCCCGGTCCCCATCATCGCCGAGCTCGACCTCTACCGCCACGACCCATGGG  
 ACCTCCCCACCGCGCCCTCTTCGGCCGCCGCGAGTGGTACTTCTTACCCCGCGCGACC  
 GCAAGTACCCCAACGGCTCCCGCCCCAACCGCGCCGCCGCTCGGGCTACTGGAAGGCCA  
 CCGGCGCCGACAAGCCCGTGCTGCACAACGGCAGGACGGCCGGGATCAAGAAGGCGCTCG  
 TGTCTTACCACGGCAAGCCCCCCCCGCGCGTCAAGACGGAGTGGATCATGCACGAGTACC  
 GCCTCGCCAAGAAGGGCGGCGCCGCCCGCGCGGGCGCGGCGCTCAGGCTGGATG  
 ACTGGGTGCTGTGCCGGCTGTACAACAAGAAGAACGAGTGGGAGAAGATGCAGAGCAGGA  
 AGGAGGAGGAGGAGGCCATGGCGGCGGCGCAGTCGTGGGGGGAGACGCGGACGCCGGAGT  
 CGGAGGTCGTCGACAGCGACGCGTTCCCGGAGATGGACTACTCGCTGCCGGCGGCGTCGT  
 TCGACGACGCCCTGCTGCCCAAGGAGGAGGCGCGGACGACGACTGGCTCATGGGGATGA  
 GCCTCGACGACCTCCAGGGCCTCGGCTCGTGTCTGCAGGCCGACGACCTCTCCATGCTCG

CGCCGCCGCCGGCGGCGAAGACGGAGCCGCTCGGCGCGCCATTCTTCTGAGCTCTCTCTC  
TCTCTCTCTCTCTCTCTCTCTGTGACTGCACCACTGTATATAAATTCAGAGTTTTCAG  
ACATGTTTCAGTATTCAGAGTTCTCAGGCAAGTTCAGAATTCAGAGATGGTTAAGGATTAG  
TGGCTTATGAGCAGTATGATATGCAGGTTAGTTTCTAGTTTAGCAGTGTACTCCAGATT  
GGAGATTTGATTAATGATTTGATTCTAATTAATGTAGTATACTGAGTGTACTCATCATC  
ACAGATTCATCAGAGCTGTGTCAAGTGACAATTCTTTTTTTTTTTTATTCCTGGATCAAG  
TTCACCATGTTGTGCTCAAGATTTGTGGATAAATGCACATCCATCCTTGAATTGGCATTG  
CTTATGTTCTTTTCATTCGATGATTTAACAAGGATTTGATACAAGTTGAGACT

CDS

#### > **OsNAC3**

ATGGCGGCGGCGAAGCGGCGAGTGCGCGACGCGGAGGCGGACCTGAACCTCCCGCCGGGC  
TTCCGCTTCCACCCACCGACGAGGAGCTGGTGGCGCACTACCTCTGCCCGCGCGCCGCG  
GGCCGCGCCGCCCGGTCCCCATCATCGCCGAGCTCGACCTCTACCGCCACGACCCATGG  
GACCTCCCCACCGCGCCCTCTTCGGCCGCGCGAGTGGTACTTCTTCACCCCGCGCGAC  
CGCAAGTACCCCAACGGCTCCCGCCCCAACCGCGCCCGCCCTCGGGCTACTGGAAGGCC  
ACCGGCGCCGACAAGCCCGTGCTGCACAACGGCAGGACGCGCGGGATCAAGAAGGCGCTC  
GTGTTCTACACGGCAAGCCCCCGCGGCGTCAAGACGGAGTGGATCATGCACGAGTAC  
CGCTCGCCAAGAAGGGCGGCGCCCGCCCGCGGGCGCGGGCGCGCTCAGGCTGGAT  
GACTGGGTGCTGTGCCGGCTGTACAACAAGAAGACGAGTGGGAGAAGATGCAGAGCAGG  
AAGGAGGAGGAGGAGGCCATGGCGGCGGCGCAGTCGTGGGGGAGACGCGGACCCGGAG  
TCGGAGGTCGTCGACAGCGACGCGTTCCCGGAGATGGACTACTCGCTGCCGGCGGCGTCG  
TTCGACGACGCCCTGTGCCAAGGAGGAGGCGCGGACGACACTGGCTCATGGGGATG  
AGCCTCGACGACCTCCAGGGCTCGGCTCGCTGCTGCAGGCCGACGACCTCTCCATGCTC  
GCGCCGCCGCCGGCGGCGAAGACGGAGCCGCTCGGCGCGCCATTCTTCTGA

Protein

#### > **OsNAC3**

MAAAKRRVRDAEADLNLPPGFRFHPTDEELVAHYLCPRAGRAAPVPIIAELDLYRHDPW  
DLPHRALFGRREWYFFTPRDRKYPNGSRPNRAAASGYWKATGADKPVLHNGRTAGIKKAL  
VFYHGKPPRGVKTEWIMHEYRLAKKGAAAAAGAGALRLDDWVLCRLYNKKNEWKMQSR  
KEEEEAMAAQSWGETRTPSEVVDSDAFPEMDYSLPAASFDDALLPKEEARDDDLWLMGM  
SLDDLQGLGSLQADDLSMLAPPPAAKTEPLGAPFF\*

#### Gene Structure

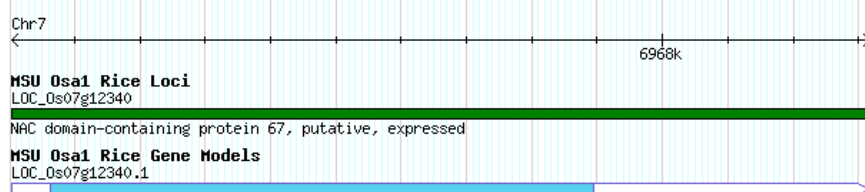

#### LOC\_Os01g60020 (OsNAC4) sequence information



**Genomic sequence length:** 1562 nucleotides

**CDS length:** 957 nucleotides

**Protein length:** 318 amino acids

**Putative Function:** NAC domain transcription factor, putative, expressed

#### Genomic Sequence

##### > **OsNAC4**

ACGAACCGACTTGGTCGCCACGGAAGCGCAGCATCAACAAAGGCAGCAGCAGCAGCAGCA  
GCAGCAGCAGCGTTGGTGGTGGTGGTGTGTATCACCACATTTTCACGAGAGGAGAAGG  
ATGGAATGGCGGCGGCGGTTGGGGGAGCGGGAGGAGGGACGCGGAGGCGGAGCTGAAC  
CTGCCCGCGGGCTTCCGTTTCCACCCGACCGACGAGGAGCTCGTGGTGCCTACCTCTGC  
CGCAAGGTTGCCCGGAGCCGCTCCCCGTCCCAATCATCGCCGAGGTCGACCTCTACAAG  
CTCGACCCCTGGGATCTCCCTGGTACGTACGCCCTCTTCTTTCTTGGTACTCTCCGTCGA  
TCTGTTTCATCCATTGGTTTGGTTTTGTGTCTGATGTTTGTGTGGTTTTGTGTGTGCGCAG  
AGAAGGCGTTGTTTCGGGAGGAAAGAGTGGTACTTCTTCACGCCGAGGGACCGGAAGTACC  
CGAACGGGTCGAGGCCGAACCGCGCAGCGGGAGAGGGTACTGGAAGGCGACGGGAGCCG  
ACAAGCCGGTGGCGCCCAAGGGGAGCGCGAGGACGGTGGGGATCAAGAAGGCGCTCGTGT  
TCTACTCCGGGAAGGCGCCGAGGGGGGTCAAGACGGACTGGATCATGCACGAGTACCGCC  
TCGCCGACGCCGACCGCGCCCCGGGCGGCAAGAAGGGCTCACAGAAGGTAGGCGTCGTGA  
CGACCGTACTCCGACGCATTTCGATTGGTGATGATGTTGAACTGATTGATGCTGATGTGCG  
ATCTCGCCGTGTTTTGTTCTCTGCAGCTGGACGAGTGGGTGCTGTGCCGGCTGTACAAC  
AAGAAGAACAACCTGGGAGAAGGTGAAGCTGGAGCAGCAGGACGTGGCCTCCGTGGCGGCG  
GCGGCGCCGCGCAACCACCACCATCAGAACGGCGAGGTCATGGACGCGGCGGCGGCTGAC  
ACCATGTCCGACAGCTTCCAGACGCACGACTCCGACATCGACAACGCCTCCGCCGGCCTG  
CGGCACGGTGGCTGCGGCGGCGGCGGCTTCGGCGACGTGGCGCCGCCGAGGAATGGGTTC  
GTGACGGTGAAGGAGGACAACGACTGGTTCACCGGCCTCAACTTCGACGAGCTGCAGCCG  
CCGTACATGATGAACCTGCAGCACATGCAGATGCAGATGGTGAATCCGGCGGCGCCAGGG  
CACGACGGCGGCTACTTGCAGTCCATCAGCTCGCCGAGATGAAGATGTGGCAGACAATC  
CTGCCACCATTCTGAGATGGATGGAGCAAGAAAAAGGTTGCTGTAGATAAAGGGCGGAAA  
TAGGAGTGATGGCTAGAAAAATTATTAGATTTACTAGAACGAAAATGATTAGAAATCTGGC  
AAGCATGATTCTGCAAAATGTGGTGGTAGATGCTTGCAGTATGTAATTCATTTGTTTCAGTA  
TATGCATTTGGTAATCTGCAAAACATCTCCTTTTGTCTCATATCCTAAGCGAAACATAT  
ATGATTTTATCCTTCATTAGTCTGAATTCTGAAATATATGCTTGATGGTTTTAAATGTTT  
TA

#### CDS

##### > **OsNAC4**

ATGGAATGGCGGCGGCGGTTGGGGGAGCGGGAGGAGGGACGCGGAGGCGGAGCTGAAC  
CTGCCCGCGGGCTTCCGTTTCCACCCGACCGACGAGGAGCTCGTGGTGCCTACCTCTGC  
CGCAAGGTTGCCCGGAGCCGCTCCCCGTCCCAATCATCGCCGAGGTCGACCTCTACAAG  
CTCGACCCCTGGGATCTCCCTGAGAAGGCGTTGTTTCGGGAGGAAAGAGTGGTACTTCTTC  
ACGCCGAGGGACCGGAAGTACCCGAACGGGTCGAGGCCGAACCGCGCAGCGGGAGAGGG  
TACTGGAAGGCGACGGGAGCCGACAAGCCGGTGGCGCCCAAGGGGAGCGCGAGGACGGTG  
GGGATCAAGAAGGCGCTCGTGTCTACTCCGGGAAGGCGCCGAGGGGGGTCAAGACGGAC

TGGATCATGCACGAGTACCGCCTCGCCGACGCCGACCGCGCCCCGGGCGGCAAGAAGGGC  
 TCACAGAAGCTGGACGAGTGGGTGCTGTGCCGGCTGTACAACAAGAACAACACTGGGAG  
 AAGGTGAAGCTGGAGCAGCAGGACGTGGCCTCCGTGGCGGGCGGGCGCCGCGCAACCAC  
 CACCATCAGAACGGCGAGGTATGGACGCGGCGGGCTGACACCATGTCCGACAGCTTC  
 CAGACGCACGACTCCGACATCGACAACGCCTCCGCCGGCCTGCGGCACGGTGGCTGCGGC  
 GCGGCGGCTTCGGCGACGTGGCGCCGCCGAGGAATGGGTTCGTGACGGTGAAGGAGGAC  
 AACGACTGGTTCACCGGCCTCAACTTCGACGAGCTGCAGCCGCCGTACATGATGAACCTG  
 CAGCACATGCAGATGCAGATGGTGAATCCGGCGGGCGCCAGGGCACGACGGCGGCTACTTG  
 CAGTCCATCAGCTCGCCGAGATGAAGATGTGGCAGACAATCCTGCCACCATTCTGA

Protein

#### > **OsNAC4**

MEMAAAVGSGRRDAEAEELNLPFGFRFHTDEELVVHYLCRKVARQPLVPVPIAEVDLYK  
 LDPWDLPEKALFGRKEWYFFTPRDRKYPNGSRPNRAAGRGYWKATGADKPVAPKGSARTV  
 GIKKALVFYSGKAPRGVKTDWIMHEYRLADADRAPGGKKSQKLDEWVLCRLYNKKNNWE  
 KVKLEQQDVASVAAAAPRNHHHQNGEVMDDAAADTMSDSFQTHSDIDNASAGLRHGGCG  
 GGGFGDVAPPRNGFVTVKEDNDWFTGLNFDELQPPYMMNLQHMQMVMNPAAPGHDGGYL  
 QSISSPQMKMWQTILPPF\*

#### Gene Structure

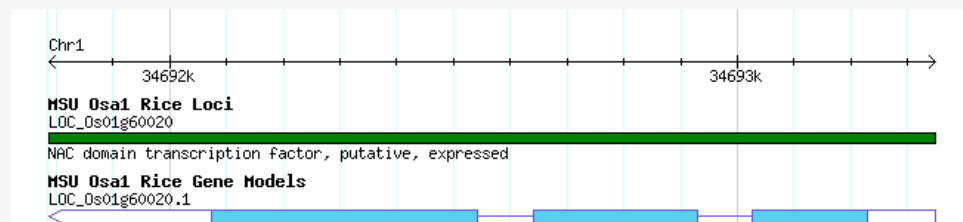

#### LOC\_Os11g08210 (OsNAC5) sequence information

**Genomic sequence length:** 2635 nucleotides

**CDS length:** 990 nucleotides

**Protein length:** 329 amino acids

**Putative Function:** no apical meristem protein, putative, expressed

Genomic Sequence

#### > **OsNAC5**

ATTCCAAAACCTTTCGAAAGCTTCCATTAGCGACTAATCCAGCCTTCGTAAAGGGTGATTA  
 GAATTTGATTAATTTCAAGGCCTCAGATCGGAGATTGAATGGAGTGCGGTGGTGCGCTGC  
 AGCTGCCGCCGGGGTTCAGGTTCCACCCGACGGACGACGAGCTGGTGATGTACTACCTGT  
 GCCGCAAGTGCGGCGGCTCCCCCTCGCCGCCCGGTGATCGCCGAGGTGGACCTCTACA  
 AGTTCAACCCATGGGATCTCCCCGGTAAGCAAGAGCAAAAGCAGATCGAATCGAATCGAG  
 GAAATTGAAGTCGAATTCAAATTCAATTAATTGGGGATTTGGAATTGTTGCAGAGAGGGC  
 GATGGGAGGGGAGAAGGAGTGGTACTTCTTCTCGCCGCGGGACCGAAGTACCCGAACGG  
 GCAGCGCCGAACAGGGCGGCGGGACGGGTACTGGAAGGCGACGGGGGCGGACAAGCC

GGTGGGGTCGCCGCGGGCGGTGGCGATCAAGAAGGCGCTCGTCTTCTACGCCGGAAGCC  
 GCCCAAGGGCGTCAAGACCAACTGGATCATGCACGAGTACCGCCTCGCCGACGTCGACCG  
 CTCCGCCGCCGCCGCAAGCTCTCCAAGTCTCCACAAACGCCCTCAGGGTTAGTATTTA  
 CTTCTTTTAATTACTTACTTCTCCTAATCTAATCATCTCTTGCTTTCAATCATTTCTCCT  
 CACCAACGAATTTACCCCCATTTTATTTTTTTAAAAATTCTACAAGGAAAAAAACAGAAAA  
 GAAATTGCCGTATACTGTATTTGTTCATATAGTGGTCTCAATCTAGAGAGCTCTAGGAAG  
 ATATGGGCAAATCAATCATCAGTAGAGGTTTGATAAAATGATTTTTATTTAAAAATTTGAG  
 AAAAGAATTTGAAAAGTGTGCCAAATTGGCAAAGTTGCAGCACGCCTGAGTTGTGCTTTT  
 GTAGCATGGCTGTAGCCGCTAGGTATAGGCTCGGATGGCGTCATGGCTCACGCACGCGCA  
 GATAGAGACAAGCCCGCGCCCAACCTTTATCGAATTTAACGTCACCTCGGAAAACGTAAT  
 CACACCGAATTTATTTACCAAAAACTTTTTACCACCACCACTCGCATGCATTCCACATCA  
 ATCTTGATCACTTTGCTAATAATTTTCAAGTTTTTTTTTTTGGTTAATTTTTTTTTTGCAGTTG  
 GATGATTGGGTGTTGTGCCGAATCTACAACAAGAAGGGAGTGATCGAGAGGTACGACACG  
 GTGGACGCCGGCGAGGACGTGAAGCCGGCGGCGGCGGCGGCGGCGGCGGAAGGGTGGTCGC  
 ATCGGCGGCGGCGGCGGCGGCGGCGGCGATGAAGGTGGAGCTCTCCGACTATGGGTTCTAC  
 GACCAGGAGCCGGAGTCGGAGATGCTGTGCTTCGACCGGTTCGGGGTCGGCGGACCGCGAC  
 TCGATGCCGCGGCTGCACACCGACTCCAGCGGGTCGGAGCACGTGCTGTGCGCGTCGCCG  
 TCGCCGACGACTTCCCCGGCGGCGGCGACCACTACGCCGAGAGCCAGCCCAGCGGC  
 GGATGCGGCGGGTGGCCCGGCGTCACTGGGCCGCCGTTCGGCGACGATGGCTTCGTCATC  
 GACAGCTCCCTCTTCGAGCTGCCCTCGCCGGCGGCGTTCTCCCGCGCCGCCGGCGACGGC  
 GCCGCCTTCGGCGACATGTTACGTACCTGCAGAAGCCGTTCTAATTAACGAACGTGAC  
 GCCTCTGCAAACGTAATTAGCTCACTAACCAGTGTGAGTTCGATCGTGTAAATCTTTTA  
 CCAGTCTAGGGTACAGCCAAAAAACCAAAATTAACCGTGCTCGATCGATCGATCGATCC  
 ATGGATCGATGATCGCCTCCACCGGCAGATCAAAATCGAAGCAAAAAATCAGGGAGAATT  
 CTTGGTACTTCCAGTACCTCTCGTCGACACCAGTGTGCGGTTTTCTGCACCGCGGATCC  
 TCGCTGGCCGCATCGTAACGGCGAGCGAGGTTAAAAATAGTGGAGAATTCAAGAACACAT  
 CCCTGATTTTTGTTTCTGCCGGATGGGGAGTACCGTGAGCATGGTAGAAATGACTGGTAA  
 AATTTTCGTTGATGATAGGTAGCCAGAGTCGATGTAACCAGTCGATTTTTTTTTTTTTTG  
 GTTTTAGTTGACATGCCTTCCTGATAGATTCAGAACAAACAATAGAGAAGAGAGGAGAAA  
 AAAACACAGAGGAGAAATTCAGAGACCAAAAGTTCAAAGTTTTGGAATTTTCAGGGGCGCC  
 AGCAGCTGATGGTATTGTCAGTCGTGTCTAGGTTTCGTAGAGGAAATTAATGTAGAAGA  
 ACGGGTACTTCAGTTCACTTCAGGTTTCGTTTCGTGCCAAACAGGTCTCTGACACTTTAGTT  
 AGGTTTTGATTTTTTTTTTCTTTTTTTCTGGTTTTTTGTGTTTTGGTAATGTAATGTAA  
 GGGTGATTGCGACATGGTATTTATGTGATTAGAGTCGCTTTCAGTTGGGTCTCTCGCGTG  
 ACCTGGAAAGCCAAATTTTGTAATGCAATTATCGGTAATAATAATAATAATAATAAT  
 AATAATAATAATAATAATAATAATAATAACAGTGCTGTAACCTGTAATTATAATA

CDS

#### > **OsNAC5**

ATGGAGTGCGGTGGTGCCTGCAGCTGCCGCCGGGGTTCAAGTTCCACCCGACGGACGAC  
 GAGCTGGTGATGTACTACCTGTGCCGCAAGTGCGGCGGCCTCCCCCTCGCCGCCCGGTG  
 ATCGCCGAGGTGGACCTCTACAAGTTCAACCCATGGGATCTCCCGAGAGGGCGATGGGA  
 GGGGAGAAGGAGTGGTACTTCTTCTCGCCGCGGGACCGGAAGTACCCGAACGGGCAGCGG  
 CCGAACAGGGCGGCGGGGACGGGGTACTGGAAGGCGACGGGGGCGGACAAGCCGGTGGGG  
 TCGCCGCGGGCGGTGGCGATCAAGAAGGCGCTCGTCTTCTACGCCGGAAGCCGCCCAAG

GGCGTCAAGACCAACTGGATCATGCACGAGTACCGCCTCGCCGACGTCGACCGCTCCGCC  
 GCCGCCCCGAAGCTCTCCAAGTCCCTCCCACAACGCCCTCAGGTTGGATGATTGGGTGTTG  
 TGCCGAATCTACAACAAGAAGGGAGTGATCGAGAGGTACGACACGGTGGACGCCGGCGAG  
 GACGTGAAGCCGGCGGCGGCGGCGGCGGCGGCGGCGGAAGGGTGGTCGCATCGGCGGCGGCGGC  
 GGCGCGGCGGCGATGAAGGTGGAGCTCTCCGACTATGGGTTCTACGACCAGGAGCCGGAG  
 TCGGAGATGCTGTGCTTCGACCGGTCGGGGTCGGCGGACCGCGACTCGATGCCGCGGCTG  
 CACACCGACTCCAGCGGGTCGGAGCACGTGCTGTCGCCGTCGCCGTCGCCGACGACTTC  
 CCCGGCGGCGGCGACACGACTACGCCGAGAGCCAGCCCAGCGGCGGATGCGGCGGGTGG  
 CCCGGCGTCGACTGGGCCGCCGTCGGCGACGATGGCTTCGTCATCGACAGCTCCCTCTTC  
 GAGCTGCCCTCGCCGGCGCGTTCTCCCGCGCCCGGCGACGGCGCCGCCTTCGGCGAC  
 ATGTTACGTACCTGCAGAAGCCGTTCTAA

Protein

#### > **OsNAC5**

MECGGALQLPPGFRFHPTDDELVMYYLCRKCGGLPLAAPVIAEVDLYKFNPWDLPERAMG  
 GEKEWYFFSPDRKYPNGQRPNRAAGTGYWKATGADKPVGSRAVAIKKALVFIYAGKPPK  
 GVKTNWIMHEYRLADVDRSAAARKLSKSSHNLRLDDWVLCRIYNKKGVIERYDTVDAGE  
 DVKPAAAAAAAGKGRIGGGGGAAAMKVELSDYGFYDQEPSEMLCFDRSGSADRDSMPRL  
 HTDSSGSEHVLSPSPSPDDFPGGGDHDAESQPSGGCGGWPGVDWAAVGDDGFVIDSSLF  
 ELSPAAFSRAAGDGAAGFDMFTYLQKPF\*

#### Gene Structure

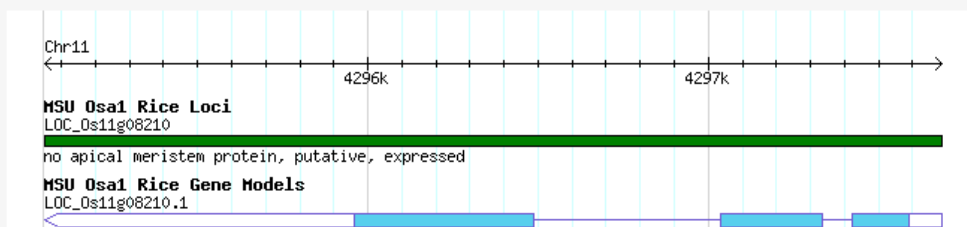

#### **LOC\_Os01g66120 (OsNAC6) sequence information**

**Genomic sequence length:** 3017 nucleotides

**CDS length:** 912 nucleotides

**Protein length:** 303 amino acids

**Putative Function:** No apical meristem protein, putative, expressed

Genomic Sequence

#### > **OsNAC6**

GTCGCTTGCCCCGGCTCTATAAATGCCCGGCTCCTCACCCGGAACAAGTTTCAAGCCCT  
 CCTCTCCTCTTCCCAACTAGTAGGATAAAGCCACAGAGAGAGCAGTAGTAGTAGCGAG  
 CTCGCCGAGAACGGACGATCACCGGAGAAGGGGAGAGAGATGAGCGGCGGTGAGGACC  
 TGCAGCTGCCGCCGGGTTCCGGTTCCACCCGACGGACGAGGAGCTGGTGATGCACTACC  
 TCTGCCGCCGCTGCGCCGGCCTCCCCATCGCCGTCCCCATCATCGCCGAGATCGACCTCT  
 ACAAGTTCGATCCATGGCAGCTTCCCGTACGATAATCCTCCTCCTCCATCCTCCCAATC

ATCACCACCATCAACGCCGTCGTGAATTGATTGATTGATTTGGTTTGATTTGTTGGTGT  
 GTGTAGGGATGGCGCTGTACGGAGAGAAGGAGTGGTACTTCTTCTCCCCGCGAGACCGCA  
 AGTACCCGAACGGGTGCGGGCCGAACCGCGCCGGGTCGGGGTACTGGAAGGCGACCG  
 GCGCCGACAAGCCGGTGGGCTCGCCGAAGCCGGTGGCGATCAAGAAGGCCCTCGTCTTCT  
 ACGCCGGCAAGGCGCCCAAGGGCGAGAAGACCAACTGGATCATGCACGAGTACCGCCTCG  
 CCGACGTGACCGCTCCGCCCCGAAGAAGAACAGCCTCAGGGTAAGCAAAAACACACCC  
 AAGATTCCATCACTAAATTCATTACTAAATCTGTGTTTCATCGTGATTATTGATTAATTTA  
 GTCACCTAATTATTCGCCCCAAAACCGCAGCTCGATTCTGAACAGCTGGTGGTACTTCTAGA  
 TGGATACTACTATTTAGATATTTGATATATTTATTTTGCAACTTGTTTAATCAGCTCATT  
 TCGCTTTTCGAAATGAATTGGGAGGATAAGCTTAGCGTGGCCACGGCTTTGGGGCCGAGA  
 AATTAATTGGAGACGTGGGTCATCTCATCTCTAGGGCCGCACCTACGTGGTGCAACTTG  
 CGCAGCCACGATCGAATCGTTCGAGCGTGAAACCCATTGCCGTACCACCTCGCCTCATC  
 CCTTTCAGGGACCAATCGGTTTTTAGCCCTACGCGCCCTGCGATCGCGACGCCACGAT  
 AGCTAAATCCCGAAAGCAAATAAGCAGTAATCGGACAGCGACTCGACCGGGATTAGTTAA  
 ACAATGGCTTGATTAATTAGATGCTGGAATTTGGAGCCTTCTGATAAGTTTAGGGCCTGT  
 TTGGCAGAGCTCCAGCTCCAGCTTACCCCTTCTGGAGCTGGAGCTCAGCCAAACAGTTT  
 CGGCTCCACCAAAACGGGGAGTGGAGCTGGGTGGAGCTCTCTACAAAATGAACTAGAGT  
 TGTGGAGTTGGGTTTAGGCAGCTCCACAACCTCCAGACTCAACTCCTGGAGTTAAA  
 TTTAGGAGTTGGAGCTGTACCAACAGGCCCTTAGTTTTGCACTTGGTACTTTAATTTTT  
 TTTTGAGTGAGTGTAATTTGTTTTCTAACTTTGTTTTATGAATTTGTTTTGTATTGGTGC  
 AGTTGGATGATTGGGTGCTGTGCCGATTACACAAGAAGGGCGGGCTGGAGAAGCCGC  
 CGGCCGCGCGGTGGCGGCGGCGGGGATGGTGAGCAGCGGCGGCGGCGTCCAGAGGAAGC  
 CGATGGTGGGGGTGAACGCGGCGGTGAGCTCCCCGCGGAGCAGAAGCCGGTGGTGGCGG  
 GGCCGGCGTTCCCGGACCTGGCGGCGTACTACGACCGGCCGTGGACTCGATGCCGCGGC  
 TGCACGCCGACTCGAGCTGCTCGGAGCAGGTGCTGTGCGCGGAGTTCGCGTGCGAGGTGC  
 AGAGCCAGCCCAAGATCAGCGAGTGGGAGCGCACCTTCGCCACCGTCGGGCCCATCAACC  
 CCGCCGCTCCATCCTCGACCCCGCCGGCTCCGGCGGCCTCGGCGGCCTCGGCGGCGGCG  
 GCAGCGACCCCTCCTCCAGGACATCCTCATGTACTGGGGCAAGCCATTCTAGACGACCA  
 AAAAAAAAAAAAAACAACCGCATTGGCAGCAATGGTGTCACTGAACACCGTGCAGGCTAG  
 CTAGCTTCATGGCCGTGAACTTTGACTCAGGCGAGCCGCCGAGTTGACTCAAAGATAA  
 TTAAGAAGTGTTTTAAGTGGATTGGATTGGATTAGACAGAGGAGATGAGGACTCGAGA  
 AAGGCGGCGATGAGACCGTGTTGGGGGGACCCTGGCCTGGACTGAACGACGACGAGGCA  
 GCAGCAGAAAGATGGTGCAATTGCATCGGGTGGCATGTCAGTGTGTGTATAGTGGCAT  
 GTACATAGTACATGGTGATTGATTCCGGTATACAGGGGGCTAGCTTTCCTGTTTCTGTTTC  
 TTCATTGGTTAATTATTACTCCCAATTATAAGGTCTTCTTCAGGGTTGCTAGCTTAATTAA  
 TTAATTAATTAGCCAGTGGTTGAAGTGTAAGTCAAAATTCATCAAGTCAGAGACTGGAA  
 TAATACAATACAGTACTGTAGATATCTTTTTTTTTTTGGTAGATGCTGATGTCTGTTTGT  
 TAGCAATGGAAAAATAAAATGATGGAACCATGCGAGGAAAAAGCGTGGAATTAATACAACA  
 GACGCATTTATTTTCCAACCGAGCTGCACATCACTACAGCTGGAGATGATCGATCAGATG  
 AGCGACCAAGCAAAATAAGCTTGGGCGCGAAGGAAATCAAACGTGCCGCTCTGGGCGGAG  
 TGAGGAAAAAACGTGAGGAATTGGAGTGCGCGCGTAGACGACATATGGGAGAGACGGGTG  
 GATATGCACGCATTGAACGATGAGTGGTTCGGTTCGTTCAATGCGCACGTGTGGGGGGCGG  
 ACGTAGTTTTGTCTTTGAGGGTTCATGGGGCGGTGCGGTTGACGACGTTCTACATGCGGC  
 CTCGTGCTTATCGCCTCCGGTTAGCCGGCGGTGCCATTCCCTGTTCTCCAGGATATGCT  
 CCTGCTATACTCTCTCC

CDS

> **OsNAC6**

ATGAGCGGCGGTCAGGACCTGCAGCTGCCGCCGGGGTTCCGGTTCCACCCGACGGACGAG  
GAGCTGGTGATGCACTACCTCTGCCGCCGCTGCGCCGGCCTCCCCATCGCCGTCCCCATC  
ATCGCCGAGATCGACCTCTACAAGTTCGATCCATGGCAGCTTCCCCGGATGGCGCTGTAC  
GGAGAGAAGGAGTGGTACTTCTTCTCCCCGCGAGACCGCAAGTACCCGAACGGGTGCGCG  
CCGAACCGCGCCCGGGTCTGGGGTACTGGAAGGCGACCGGCGCCGACAAGCCGGTGGGC  
TCGCCGAAGCCGGTGGCGATCAAGAAGGCCCTCGTCTTCTACGCCGGAAGGCGCCCAAG  
GGCGAGAAGACCAACTGGATCATGCACGAGTACCGCCTCGCCGACGTCGACCGCTCCGCC  
CGCAAGAAGAACAGCCTCAGGTTGGATGATTGGGTGCTGTGCCGGATTTACAACAAGAAG  
GGCGGGCTGGAGAAGCCGCCGGCGCGGTGGCGGCGGCGGGGATGGTGAGCAGCGGC  
GGCGGCGTCCAGAGGAAGCCGATGGTGGGGGTGAACGCGGCGGTGAGCTCCCCGCCGGAG  
CAGAAGCCGGTGGTGGCGGGGCCGGCTTCCCGGACCTGGCGGCGTACTACGACCGGCCG  
TCGGA CTCGATGCCCGGCTGCACGCCGACTCGAGCTGCTCGGAGCAGGTGCTGTCGCCG  
GAGTTCGCGTGCAGAGTGCAGAGCCAGCCCAAGATCAGCGAGTGGGAGCGCACCTTCGCC  
ACCGTCGGGCCCATCAACCCCGCCGCTCCATCCTCGACCCCGCCGGCTCCGGCGGCCTC  
GGCGGCCTCGGCGGCGGCGGCAGCGACCCCTCCTCCAGGACATCCTCATGTACTGGGGC  
AAGCCATTCTAG

Protein

> **OsNAC6**

MSGGQDLQLPPGFRFHPTDEELVMHYLCRRCAGLP IAVPI IAE IDLYKFDPWQLPRMALY  
GEKEWYFFSPRDRKYPNGSRPNRAAGSGYW KATGADKPVGSPKPVA IKKALVFYAGKAPK  
GEKTNWIMHEYRLADVDRSARKKNSLRLLDDWVLCRIYNKKGGLEKPPAAVA AAGMVSSG  
GGVQRKPMVGVNAAVSSPPEQKPVVAGPAFPDLAAYYDRPSDSMPRLHADSSCSEQVLSP  
EFACEVQSQPKISEWERTFATVGPINPAASILDPAGSGGLGGLGGGSDPLLQDILMYWG  
KPF\*

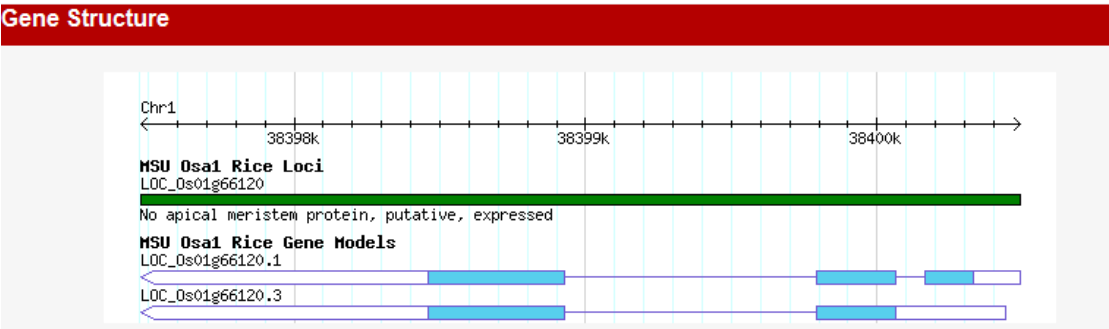

**LOC\_Os06g33940 (OsNAC7) sequence information**

**Genomic sequence length:** 2593 nucleotides

**CDS length:** 1131 nucleotides

**Protein length:** 376 amino acids

**Putative Function:** NAC domain containing protein, putative, expressed

Genomic Sequence

> **OsNAC7**

ATAGGGCTTGTCTTTGCTGAGAGAGCATCTTGGACTTCCTATCCTTCTAACCCTATCCCC  
 TCTCCTTTCCCATATAACCCATACACATCCTCTGCCTTGCTCCATCATCCTCTTCCTCTT  
 GTTTTTCTTGCTGCTTGTCCCTATCTTTTTGTTGCATTGAGGAGCTGATGAGCTGAGCTA  
 ATCAGGGCAGAACAAAGGCAGGAGGATATAGTTTTCCAAGGTTTGTGCTCTTCCTTTTGT  
 TCTGTTTTAGCCCTATGCATGAAGAGGAAGGTATATAGTCAAGATTGCATGCACTTCTCT  
 GATTCAAAGGTTGCTTTTCAAGCTAGTAACTCAAGTAGATGATCTTCTGGTGTTCCTCTC  
 CCAAATCTAAACAATGTCTGAATCTCATCAGATCCTAGGGCCGGCCTGCATCAAAAAGAA  
 GGATGCATCCGAGCGGCGGCGCGCTGTCGGTGCCACCGGGGTTTCGGTTCACCCGACGG  
 ACGAGGAGCTCCTCTACTACTACCTGAGGAAGAAGGTGGCCTACGAGGCCATAGATCTCG  
 ACGTCATAAGGGAGATCGACCTCAACAAGCTCGAGCCCTGGGATCTCAAAGGTAAAATTG  
 AAATTGAGCAATCAATCAGTCAGCTCATCTAGCTAGCCGGCCGGAGCTAGCAAGCATGCA  
 ACAGTGAGATTTAGCTGAAGTTTAAACATGGTGATTAATATTTTCATGTGGTATATATACA  
 GATCGGTGCAGGATAGGGACGGGGCCTCAGAACGAGTGGTACTTCTTCAGCCACAAGGAC  
 AAGAAGTACCCGACGGGGACGAGGACGAACCGGGCGACGACGGCGGGGTTCTGGAAGGCG  
 ACGGGGAGGGACAAGGCCATCTTCCTCGCCAACGCCTGCCGCATCGGCATGAGGAAGACC  
 CTCGTCTTCTACGTCGGCAGGGCGCCCCACGGCAAGAAGACCGACTGGATCATGCACGAG  
 TACCGCCTCGACCAAGACAACGTCGATGTCCAGGTATATATATATATATATATATATA  
 TATTTGACATCAGCAAAAACCATATGCAACATTAAGTTCACGATATACATACTTAGCATC  
 CATGAAATGCCAAAGTCATGCATGATATCACGACTCATGAGTACTGGTACTCCCTCCGTC  
 CAAATATATAAGTATTTCTAGCTATGAACTTGAACAACGCGTGTTTAGATTTCATAGCTA  
 AAAGTTACTATATTTTGGGACGAATTGCAGTTATGCTAGTTTGTGCTATTTATCAGTCATC  
 TAGAACTTTGTTATTTTGTGAGTTACCTACATGAATTTGTGTGTACTATGTATATGCAAT  
 TGGTGGTTGATCCAAAGAGAATAAAGTTTCAGGCTGAGAATTAGTAAAAAGGGATATGTG  
 TGTTGTACAGAAAGATTCACCTTCATGGAACCTTGCCATATATAGCTCAAGGGTTTCTTGC  
 TACTGAGATTGATGAACTAATTAACAGCTTAATTAATTTACTGAGATTCAATTGTCTGATC  
 TGAAAAATGAAAAATACATCATTGCAGGAAGATGGTTGGGTGGTGTGTAGGGTATTCATGAA  
 GAAGAGCTACCAGCGAGGCCTCAACCCGGCGGACATGGCGGCGGTGACGACGACGACCT  
 CCTCCACCACCACCACCACCCCTTCCCACCGGCCAGCTCCACGGCGGCGCCGCCGACCA  
 CAAGCACGACGGCGCCGGCGGCCACCACCACCACCTCATGCAGCCGACCACTACTA  
 CGACGACTTCCCTTCCTTCGACCCCTCCATGCAGCTCCCCCAGCTCATGAGCGCCGACCA  
 GCCGCCGCCGCCACCGCCGTCCCTCCCTCCCGGGCGTCCCACCCTCCGCCGCCGCTGCCTT  
 GAGCTCCCTCGACGTCGAGTGCCCCCAGAACCTCATGAAGCTAACGTCGGCCGCCGCCGG  
 AGGCGGTGCCACCGGGCTGCTCCACGCCGGCGGCGACCACCGCTTCGCCACCGCCGCCAC  
 GGACTGGTCCATCCTGGACAAGCTCCTCGCCTCGCACCAGAACCTGGACCAGCTCTTCCA  
 GGGCAGGGTCATCGCCGAGCGTCGTCGCCGGCTGCCATGGCTGCTCCTAGCCACCACCA  
 GCATCTCATGGATCAGCTCGCCGGCGGCGGCGGCGGCGGCGGCGGCGGCGGCGGCGGCGG  
 TCCACTGCAGTATCTGGGGTGCAGAGCGACCGACCTGCTCAGGTTCTCCAAGTAGAGAGA  
 TTATCCCTCCATGCATGCATGGATCACTTGAACCTAAGCTAGCTTAATTAGCTGCCACCGA  
 TAAATGAGCAGTTGATGATGGTGATGATGATCTGAATGATCAGCTCATGTTTTTTTGGTT  
 AGACTGGTTAATTTGATCTTCCTTTTGGTATGGAGCTTAATGCTTCCAAGTGATATACA  
 CTCTATGCTATGCTATGCTATGTTTTCCCATGTGCATGCATGCAAATGTGGCTTTGAAAC  
 CTAATTATACATGCATGAGAATACTTAATTAATATTTCTGATTTTCCCATGCATTTTGG  
 ATTTAAGTGTTGCTTCTTAATTAGGATGCTTCATAATTGCTGGCTGATGAATGAGAACCG  
 ATATTAATTTACC

## > OsNAC7

ATGCATCCGAGCGGCGGCGCGCTGTCTGGTGCCACCGGGTTTCGGTTCCACCCGACGGAC  
GAGGAGCTCCTCTACTACTACCTGAGGAAGAAGGTGGCCTACGAGGCCATAGATCTCGAC  
GTCATAAGGGAGATCGACCTCAACAAGCTCGAGCCCTGGGATCTCAAAGATCGGTGCAGG  
ATAGGGACGGGGCCTCAGAACGAGTGGTACTTCTTCAGCCACAAGGACAAGAAGTACCCG  
ACGGGGACGAGGACGAACCGGGCGACGACGGCGGGGTTCTGGAAGGCGACGGGGAGGGAC  
AAGGCCATCTTCCTCGCCAACGCCTGCCGCATCGGCATGAGGAAGACCCTCGTCTTCTAC  
GTCGGCAGGGCGCCCCACGGCAAGAAGACCGACTGGATCATGCACGAGTACCGCCTCGAC  
CAAGACAACGTCGATGTCCAGGAAGATGGTTGGGTGGTGTGTAGGGTATTTCATGAAGAAG  
AGCTACCAGCGAGGCCTCAACCCGGCGGACATGGCGGCGGTTCGACGACGACGACCTCCTC  
CACCACCACCACCACCCCTTCCCACCGGCCAGCTCCACGGCGGCGCCGCCGACCACAAG  
CACGACGGCGCCGGCGGGCCACCACCACCACCTCATGCAGCCGCACCACCCTACGAC  
GACTTCCCTTTCCTTCGACCCCTCCATGCAGCTCCCCAGCTCATGAGCGCCGACCAGCCG  
CCGCCGCCACCGCCGTCCCTCCTCCCCGGCGTCCCACCTCCGCCGCCGTGCCTTGAGC  
TCCCTCGACGTCGAGTGCCCCAGAACCTCATGAAGCTAACGTCGGCCGCCGCCGGAGGC  
GGTGCCACCGGGCTGCTCCACGCCGGCGGCGACCAACCGCTTCGCCACCGCCGCCACGGAC  
TGGTCCATCCTGGACAAGCTCCTCGCCTCGCACCAGAACCTGGACCAGCTCTTCCAGGGC  
AGGGTCATCGCCGGAGCGTCGTCGCCGGCTGCCATGGCTGCTCCTAGCCACCACCAGCAT  
CTCATGGATCAGCTCGCCGGCGGCGGCGGCGGCACCGCCTCGTCGTTGCAGAGGCTTCCA  
CTGCAGTATCTGGGGTGCGAGGCAGCCGACCTGCTCAGGTTCTCCAAGTAG

## Protein

## > OsNAC7

MHPSSGGALSVPPGFRFHPTDEELLYYYLRKKVAYEAIDLVDIREIDLNKLEPWDLKDRCR  
IGTGPQNEWYFFSHKDKKYPTGTRTNRATTAGFWKATGRDKAIFLANACRIGMRKTLVfy  
VGRAPHGKKTDWIMHEYRLDQDNVDVQEDGWVVCRVFMKKSYQRGLNPADMAAVDDDDLL  
HHHHHPFPQAQLHGGAADHKHDGAGGHHHHHLMQPHHHYDDFPSFDPMSQLPQLMSADQP  
PPPPSLLPGVPPSAAAASSLDVECPQNLMKLTSAAAGGGATGLHAGGDHRFATAATD  
WSILDKLLASHQNLDQLFQGRVIAGASSPAAMAAPSHHQHLMQDLAGGGGGTASSLQRLP  
LQYLGCEAADLLRFESK\*

## Gene Structure

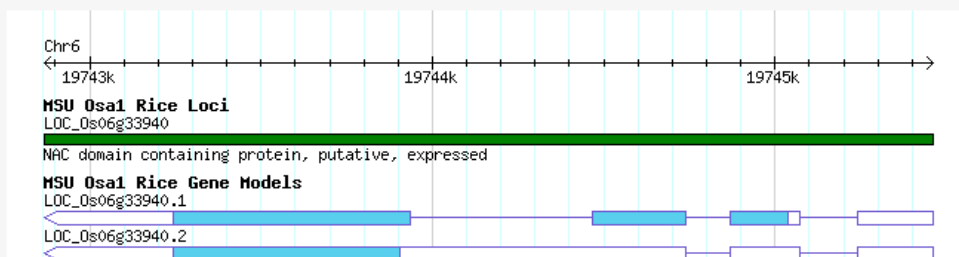

### LOC\_Os01g15640 (OsNAC8) sequence information



**Genomic sequence length:** 4718 nucleotides

**CDS length:** 1470 nucleotides

**Protein length:** 489 amino acids

**Putative Function:** no apical meristem protein, putative, expressed

#### Genomic Sequence

##### > OsNAC8

```
CTCCTACCCATCCATCCCTAGCTTCCTCGCTGCTTCGCCCCGCCACGTCACCCTCCTCCTC
CTCCCCTTTTTTTTCTCTCGCTCGCCTCGCCATCCATGGCGTCGATGGCGAACCAGCAGT
AGTAGTAGTCCACCCCAACGACGCGCGCGAGCCAGCTCCGGGGTACCCGCCGCTCGTGCC
CGGGGGGAAGGGGGTGCACCGGGGAGCCGTCGCGCCGCGGGCTCTGATTCTTCCCGTT
CCCGGAGGTGAGTGGGTTGACTGACTCCTCCCCGCTCCGCGCCGCGCCGCGACTGGCCTC
GACTCTGCGTGTGTGTTTGGTTAGGTGATTTGGATTGTTCCGCGCTTGACGACGTCCCCG
CTCGTTGTTGGGGGGTTTCGTCTTGGTGCGGGGGATTTTTTTGTTGTTTAGCGTTCGTTT
ATGTTAGGGGTAGTTGTTTCGTCTCGTCTCGGGAGGTGGGGGGTTTTAGGGTGATTCTTC
GATCGAGATCTTCGTTTAGGGGTGCGATCACTCGCCGATTGCGGATCTTTGCCGCGGAA
TTTTTCTTATTCTTTTTTTTTTTTTTGCCTCCTGGGGTTTTCGATTGCGGGGGCAGATTC
TTGGGGGATTCGAGACGCGCGTAATGGGGATTGGTTGCGACCCCGTCGAAATCCGAGTGG
ATCGGTCGGTTGGTTGGTTGTGCGAAGAAATGGTGTCTTGAAGTAGTTCGGTATTTGGG
GAATTAGGATAGCTGCTCTTCCCTCAGTGCTTCAATAGGATGATAAATCAGTGAATTCCC
GATTGTTTTTTCTTTTCCCATTTTAGCTAGCCTATAATAGGATATCACCCACTTTTCAG
GTGGTTTAATGTGAAATTTGGAGTTATTACCATATTCCTACTAATCATTTTAGAATTTCC
TCCCCTGCTTGCTTTGAACCTGAAATTGTCAATAATTAGAAAGGAGGAAGCATCATTGTT
CATATGGATTTTTGTTAGTTTGCCTCCATGTTTATCTTCTGTAAAATGCTTGGGGATGTT
ACTCCATGAGCATACTAAAAATCGCCAACGTTTGTGTTGAGAAATCTTTCTAGAAAGATTTA
TAAGATCGTCACTTATGTTCTTTAGTTTTTAGGCAGTAAGTCGTTGTGCTAAATACCCAT
GCCGTTTTAGATTCTCCCTGATCATGTTTGCTTTTCTTGATTCATGCACAGATTTGAACC
ATGGAGTCTTTACGTGACATGGTCCTCCACCAGGATTTGGATTCCACCCAAAAGATACT
GAGCTCATTTCTCACTATCTGAAAAAGAAAATACATGGCCAAAAGATTGAATATGAGATC
ATTCCAGAGGTGGATATATACAAGCATGAACCATGGGATTTACCTGGTAAGTTGAACATT
ATTCCATGACAACCTATATTTGTTTCGTTCCATAGAGTTTGCTGATGAGAAAAGAGTCAA
TATTTGACCATCAATTTAAACTAGATAATGCTGGTAGATGGAAACATTCATGTTTGCAAG
AACCCTGGGGAATGCACCAGAATGTTTTCTGTATTCTTAGTACTGTTGTCATTTCTTAG
TACTGTTGCATCCTTTGCCTTTTTAAATATTATGCAACTGATTGCCAATTATGTATCTTC
TTTGTTCAATTCTCTGCCCTGTTATTTTGATAGATGAGTTTCTTTTTTCTACTTTTTGGC
TTCCTTTGTTTGATGCCGCTTGAATCTAATTATGTAAACTGCTGATGATATTTACAT
TACAGCAAAGTGCGATGTTCCAACCTCAGGATAATAAGTGGCATTTCCTCGCTGCTCGTGA
CAGAAAGTATCCTAACGGTTCTCGGTCAAAATAGGGCAACAGTTGCTGGGTATTGGAAATC
CACTGGAAGGATCGAGCCATAAAAAATGGGCAAGCAAACTATAGGAACGAAGAAAACCTT
AGTTTTTCATGAAGGCCGCCACCCACTGGGAGACGTACTGAGTGGATCATGCATGAGTA
CTATATAGATGAGCGTGAATGTCAAGCCTGCCCTGATATGAAGGTATTGAACTAATTATT
AAGATTTTAAAGTGGCTTATTTAGAAAAGAGAGAACTATATTGTGGCTTTACATGATACT
CCCTCCGTTTCAAAATATTTGACACCGTTGACTTTTTTAGTACGTGTTTGAATTCGTCT
TATTCAAAAAATTTAAGTAATTATTTATCTTTTCATATCATTTGATTCATTGTAAATA
TACTTTCATGTACACATATAGTTTTACATATTTTACAAAATTTTTTTTAATAAGACGAACG
```

GTTAAACATGTGCTAAAAAATCAACGGTGTCAAACATTTTGAAACGGAGGGAGTATATAA  
 ATTAATGTGCACTGTACCTTCTTGATGTCACTCTTCAAACAACTTGCTGGTTTAGATGAT  
 ATAATCATATGATTTGCTGACTAAGGGCGAATTCCAGTATCTAATGTAGGGCTTTTATTT  
 TATTGTCCCTCAGGATGCATATGTACTTTGTCGTATTACCAAAAGAAATGACTGGATCCC  
 AGGGAATGGCAATGAGTTGGACAACAGTGATCCTCATCCAGAACCATATGATGCTCCTCC  
 ATCAGTTATCAGTACTGAACAGCTAAATCCTGCTGCTGAACCAGTTGTCGGTGTGAAGC  
 TGCACCAGTTACCGTTGCTGAACCTGACGGTGTACTACGTCAGCTATCACTGCTAATAT  
 ACCATCTCCTAGTGATGACATTAATCTGGATGATTGGTTGAATGAACTATTTGATCCTTT  
 CTTTGACCCTGAACAGAGTCTGGCTTCTGCTGATCTGTCTCCAGATGAACAAAATGTTGA  
 ATCATCGGTGAGTTTCTTCACAGTCACTGTGTTTGCAGGTTAAATAATTCAATGGATAAA  
 TTATTAGAATGTTGTAGTGACATTATTAGAATGTTGTAGTGAAGTCCAGCTCCCTATGAGA  
 ACGGGCTATTGCATGAACAAGAATCTGTTGGACAAATCTAACATGCTTGTACTCATAAT  
 AAATTGATCTTCACTGGTCCACTTGTGCATACTGATTGCTATTTAATATATCTGCATAAT  
 GCATTTCTGATAGACAAAATACTGAATAACTTCACGAACATATAGAAACCAACACAACA  
 TTGCATTATAGTAATGTTTGTGAGCCTAGTACAGCACTGGTTACTGCTTGGGAATTGATA  
 CTAAGCCTAGTACAGCACTGGTTACTGCTTGGGAATTGATACTAATATGAAGCATGTGAC  
 TGGTAATGACCTTTAGAGATACCTAGACATAGGCAAATCACAATGTTGTGACCATTTTTT  
 TTTGTGACTTAGTATGGCTGCCCTTTTATTTTCTTTTGCTGGTTGACAAAGAAGATTTGC  
 TTGTAATTTTTTTAGGAACACCGGAGTAATGCATTCTCATGGATAATATTTGAAACTCAT  
 TGAAAATTATTATGATTTGTTTGGATTGACTTTTTTAAAAAATAGCCATGATTTGCATATA  
 CCATGGACTGAAGCTATCTTATGTGTTACGGTTTGTTCACCTCTTCTGAGATTTCTGGT  
 TATTGCCAAGTATCTGGTCTGTTATATTATGGGGAAACGTTGACTGTAGTTGTGTTTTCA  
 TACCATGTTCTTTCTTTAACACGGAACCTAGGAGTCAATGTATTTTCTGCAAATCATGAA  
 TTGTACTTGTCAATTGTGCTGTGCATTCTGCCATTCTACTATGTTTTGATTGCAGTTCTTA  
 GCCTGTGCATACTTGTCTATCGCGCTATCTTCCTTCTTAATTTACAGAACGTAGGTGCTT  
 TGGCTCCAAAGGTGGAACAAGACTATTCTAGTCCTAACGAGAACGTAGTAGATGATACGG  
 AGTACTTGTTCCTGAAGATGTTTACAACATACTGCACCCTGGTACAGATGACTTCAATA  
 TGCTCCAGAATCCTTTGGATCAGTACCCCATTCATATGCAACCGATGTTTGGAGTGGAA  
 TTCAGAAGGAAGAACTGTGGTGCCTCCAGGCAATGCTGAGCCTAGTCAGTCGAATGAAG  
 CTGCTGATAATGGAATTATAAGACGTTATCGTAGTATGAAAACACCTGAAACTAGTGTGC  
 CGCAGTTCAAGGGTAAAACTCAGGCTAAAAATGCGGGTTGGGATCAACAAGATGGCTACGA  
 GTAGTTCTGAATCTATCAACCAGACTATCAAGTTTGAGAACAGTGGTCGTCTTGTGAGC  
 ACCAGAAGAACCAAGCGCATGATGTAGCTTCTACCAAGCGGTCAGACGCAGGGAAGCCAA  
 GTACAGAGCTCAGCAGCAATCGAGGATTTCTCAGGGGTATCCGAAATGCATTTGCAGGCT  
 GTTCGGATGCTCGATGGAACATGATACTTGTGCGGGTTTCGCTATTGGAGTCGCTGTGG  
 TAGCGCTTCATATAGGCCAACGCCCTTGATTAAAGCCAGAGAGATCAGCAGCATACCTAGC  
 CTTTAGGTTTGCAGGTTACTGGGTTTCTATGCTTTTTTGCAATCTGGAGAAACGTAAACAA  
 ACTCCGATCTTTGGTTGGTGCAGAACATTTGATGTATGCGCCGTTTTTTTTTGTGTTGGTT  
 TTGTACATATTATTATCTTCGGTTTTTGGTCGACTTTTGTCTCGCCAGCTAGTAGTACTA  
 TGTTGACGAATGTAGAAGAAAAACCTCAAAAAAAAAAAGAACAAATGAAAAAAAAATTGACGA  
 TGAAAATTTATATAATTAACCGCTTGCAATTGTACTATA

CDS

> **OsNAC8**

ATGGAGTCTTTACGTGACATGGTCCTCCCACCAGGATTTGGATTCCACCCAAAAGATACT

GAGCTCATTTCTCACTATCTGAAAAAGAAAATACATGGCCAAAAGATTGAATATGAGATC  
 ATTCCAGAGGTGGATATATACAAGCATGAACCATGGGATTACCTGCAAAGTGCGATGTT  
 CCAACTCAGGATAATAAGTGGCATTCTTCGCTGCTCGTGACAGAAAGTATCCTAACGGT  
 TCTCGGTCAAATAGGGCAACAGTTGCTGGGTATTGGAAATCCACTGGAAAGGATCGAGCC  
 ATAAAAATGGGCAAGCAAACTATAGGAACGAAGAAAACCTTAGTTTTTTCATGAAGGCCGC  
 CCACCCACTGGGAGACGTACTGAGTGGATCATGCATGAGTACTATATAGATGAGCGTGAA  
 TGTCAAGCCTGCCCTGATATGAAGGATGCATATGTACTTTGTCTATTACCAAAAGAAAT  
 GACTGGATCCCAGGGAATGGCAATGAGTTGGACAACAGTGATCCTCATCCAGAACCATAT  
 GATGCTCCTCCATCAGTTATCAGTACTGAACAGCTAAATCCTGCTGCTGAACCAGTTGTC  
 GGTGTTGAAGCTGCACCAGTTACCGTTGCTGAACCTGACGGTGTTACTACGTCAGCTATC  
 ACTGCTAATATACCATCTCCTAGTGATGACATTAATCTGGATGATTGGTTGAATGAATA  
 TTTGATCCTTTCTTTGACCCCTGAACAGAGTCTGGCTTCTGCTGATCTGTCTCCAGATGAA  
 CAAAATGTTGAATCATCGAACGTAGGTGCTTTGGCTCCAAAGGTGGAACAAGACTATTCT  
 AGTCCTAACGAGAACGTAGTAGATGATACGGAGTACTTGTTCCTGAAGATGTTTACAAC  
 ATACTGCACCCTGGTACAGATGACTTCAATATGCTCCAGAATCCTTTGGATCAGTACCCC  
 ATTCAATATGCAACCGATGTTTGGAGTGGAATTCAGAAGGAAGAACTGTGGTCGCCCCAG  
 GCCAATGCTGAGCCTAGTCAGTCGAATGAAGCTGCTGATAATGGAATTATAAGACGTTAT  
 CGTAGTATGAAAACACCTGAAACTAGTGTGCCGAGTTCAAGGGTAAACTCAGGCTAAA  
 ATGCGGGTTGGGATCAACAAGATGGCTACGAGTAGTTCTGAATCTATCAACCAGACTATC  
 AAGTTTGAGAACAGTGGTCGTCTTGTGAGCACCAGAAGAACCAAGCGCATGATGTAGCT  
 TCTACCAAGCGGTCAGACGCAGGGAAGCCAAGTACAGAGCTCAGCAGCAATCGAGGATTT  
 CTCAGGGGTATCCGAAATGCATTTGCAGGCTGTTCCGATGCTCGATGGAACATGATACTT  
 GTTGCGGGTTTCGCTATTGGAGTCGCTGTGGTAGCGCTTCATATAGGCCAACGCCTTGA  
 TTAAGCCAGAGAGATCAGCAGCATACCTAG

## Protein

### > OsNAC8

MESLRDMVLPPGFGFHPKDTELISHYLKKKIHGQKIEYEI IPEVDIYKHEPWDLPAKCDV  
 PTQDNKWHFFAARDRKYPNGSRNRTVAGYWKSTGKDRAIKMGKQTI GTKKTLVFHEGR  
 PPTGRRTEWIMHEYYIDEREQACPDMDAYVLCRITKRNDWIPGNGNELDNSDPHPEPY  
 DAPPSVISTEQLNPAAEPVVGVEAAPVTVAEPDGVTTSAITANIPSPSDDINLDDWLNEL  
 FDPFFDPEQSLASADLSPDEQNVESNNGALAPKVEQDYSSPNENVVDDTEYLLPEDVYN  
 ILHPGTDDFNMLQNPLDQYPIQYATDVWSGIQKEELWSPQANAEPSSNEAADNGI IRRY  
 RSMKTPETSVPPQFKGKTQAKMRVGINKMATSSSESINQTIKFENSGRLVEHQKNQAHDA  
 STKRSDAGKPSTELSSNRGFLRGIRNAFAGCSDARWNMILVAGFAIGVAVVALHIGQRLG  
 LSQRDQQHT\*

## Gene Structure

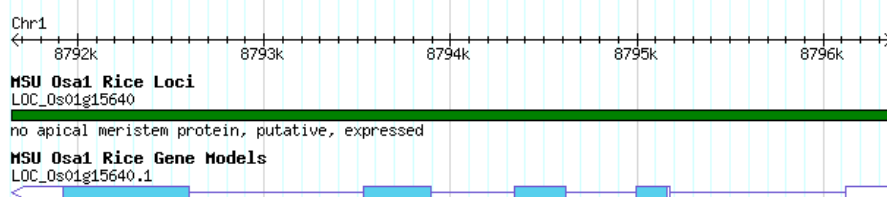

### LOC\_Os09g33490(ONAC001) sequence information

**Genomic sequence length:** 1860 nucleotides

**CDS length:** 744 nucleotides

**Protein length:** 247 amino acids

## Genomic Sequence

>ONAC001

[illegible]

CDS

>ONAC001

ATGGCGACGCCGGGGCAGCAGCTGCCGCCGGGGTTCAGGTTCACCCGACGGACGAGGAG  
CTGGTGGTGCAGTACCTCCGGCGGAGGGCGCTGTGCCGGCCGCTCCCCGCCGCCGTCATC  
CCGGACGTCCACGACGCCACCGTGCTCGACCCCTGGGACCTCCCCGGCGCCGGCGCATGGT

GAGGCCTACTTCTTCAGCTTCCGGCAGCTCGCGGCGGCGAGCGGCGGCGGCGGGTGGCGG  
 AGGAGGAGGGCGGGGAGTGGGTACTGGAAGGCGACGGGGGCGGAGAAGCCGGTGTTCCTG  
 CGTGGCTTCGGGTGCGGCGGCGGCGGCGGCGGCGGCCAGCACCTCGTCGGCGTCAAG  
 ACGACGCTGCTCTTCTCCGCGCAAGCCGCCGTGCGGCACCCACTGGGTTCATGCACGAG  
 TACCGCCTCGCCGCCGCCGGCGCTGTGCGCGTCCGCCGCCCGGACAGACAAAGCGCGGG  
 AACCATAGTTGCATGGCTCAGCCAGGAGAATGGGTGGTGTGCCGATTTTTCTGAAGAAC  
 AACAGGTCATCAAGAAGGCGAGCCGGCGACGCCGACGGCGAAACGCCGGTCACCGGTGTC  
 CACGGTCACCGTCGGCGGCAGCCGTGCGCGTCCGCCGTGTCGTCGAGCTGTGTACGGCT  
 GAGGTTTCAGACGAGAAGGAGAAGAAGTACAGCAGTGGCAGCATCAATGGTGCTCCA  
 TCTGCCTCTCAAAGAGAGGCCTAG

#### Protein

>ONAC001

MATPGQQLPPGFRFHPTDEELVVQYLRRRALCRPLPAAVIPDVHDATVLDPWDLPGAGDG  
 EAYFFSFRQLAAASGGGGWRRRRAGSGYWKATGAEKPVFLRGFGCGGGGGGGGQHLVGVK  
 TTLLFLRAKPPSRTHWVMHEYRLAAAGAVAVAAAGQTKRGNHSCMAQPGEWVVCRIFLKN  
 NRSSRRRAGDADGETPVTGVHGHRRRQPSPSPSSSSCVTAEVSDGEGEEVSSGSINGAP  
 SASQREA\*

#### Gene Structure

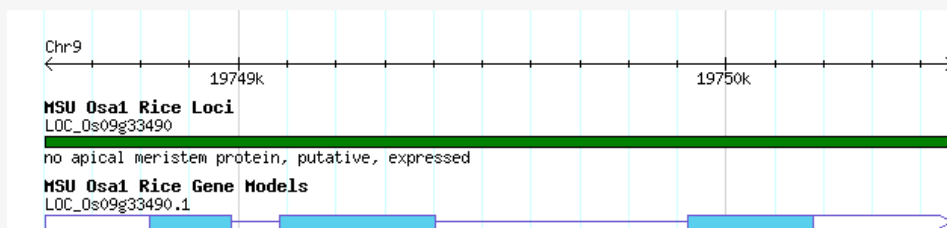

#### LOC\_Os01g09550 (ONAC003) sequence information

**Genomic sequence length:** 6743 nucleotides

**CDS length:** 1461 nucleotides

**Protein length:** 486 amino acids

Genomic Sequence

>ONAC003

AGGAATTCTGCTCTCTCTCTCTTGTATTAACTTGTGAAAGCAGCAGGCTGCCTGC  
 CTCGATTTTTTTTTATATGTACACCTCTCCACACTCCTTGCTCTCTCGTTTGCTCTTC  
 TACTGCTCATCTCTCTCTACTACTCGTCCTCTTTGGTTTGCTTCCGGCCTCTTCTTC  
 CTGCATAGCTTCTGTTATTCGATTTCGATGATCTTGTCTTCTCCTTGAATTGTGTGTGA  
 TTAATTAAGTATGTTTGTGTTGATCCCTTGCAGCTCTATTACAGCTAGCAACAAGAAG  
 GAGGCTTACACATGCATGTGCACGGTCTCTGCCGGACGCATATGAATCAGGCATGAATAG  
 GGGGCACATCAGCAGCTCGGAGCTCATCGACGCCAAGCTCGAGGAACGCCGGATCTCCAC  
 GGCCAAGCACTGCCCCAGCTGCGGCAACAAGCTCGACTGCAAACCGGTATGTGAAGAGTG  
 AAGTGATCAACTTCGTTTTGCCTAGCTCTTTTCAGTAATTGCACACTTGCACCTCGGTGC  
 GTAGCGAGGGTTCTTGGGCTTCTTGCTGCCTGGTGCAAACTTGTCTTATGGAATTAAT

TGGTGTAAGTCAAGAAGGATTGGGTGGGGCTACCGGCAGGAGTCAAGTTCGATCCGACG  
GACCAGGAGTTGATCGAGCACCTCGAGGCCAAAGTGAGGGAAGAAGGCTCAAGATCTCAT  
CCTCTCATCGATGAGTTCATACCCACGATAGAAGGGGAGGACGGCATATGCTACACCCAC  
CCTGAGAACTTCCAGGTGAGAGTGAGAGAGCTAAGGTAGCTATAGCTCAAAACATTGCA  
CCCCCGCATTGTTTTGATACAGATATATTCCTGGCTTTTTGCAAACTTTATCGGGTTT  
TTTTTGCTTTCCATGGAGTGATATATATTGTATGCTGGGATTGTTTCGCCATGAATTATG  
GGTCGTGGTTTTGGATTTTGGGATATGGCATATATTCCTTGTGTTCTTGATGTGCTCT  
CCCCCTCTCTATTCTTACTAGTGTCTCTACATGTGCTCTTGGCCGGTATATGCA  
AAGAGAATTATTGTTTATGGAAGTTGTGCCTAGTCTCATCTCCACTCTCTCCTCTCTG  
TCATGATGGTAAGATGCTTCTGAAGTTTCCAAATAGGTTTCTTTCTCTCTTCTCTTTT  
TCAGAGAGGTTTGTGTCATCTGTCAAGAAGCATAGGCCACCCACTCCACACTATACTCTT  
GGATCTCAGAAACTCTCTATACTACCTTGATCCTGCTAATTATTCTGTTTGTGCTGATC  
GATCGATGGAGCAGGTGTGACAAGGGACGGCCTGAGCAAGCACTTCTTCCACCGGCCGTC  
GAAGGCGTACACGACGGGGACGAGGAAGCGGCGGAAGATCCAGACGGAGTGGACGTGCA  
GAAGGGGGAGACGAGGTGGCACAAGACCGGCAAGACCCGGCCGGTGATGGTGAGCGGCCG  
GCAGAAGGGGTGCAAGAAGATACTGGTCTCTACACCAACTTCGGCAAGCACCGCAAGCC  
GGAGAAGACCAACTGGGTGATGCACCAGTACCACCTCGGCGACCTCGAGGAGGAGAAGGA  
AGGGGAGCTCGTCGTCTGCAAGATCTTCTACCAGACGCAGCCTCGGCAGTGCAGCTGGTC  
CTCCGACCGCGGCGGCGGCCGCCGCCACCGCATCCGCCGTGACGACGGCGGCGGTGCA  
GCAGGATCAGCAGCGCAGGAGGGACAGCGGCAGCGGCAGCTGCTCGTCGACGAGGGACCA  
CGAGGTGTGCGCGACGTCCTACTCGACGGCCGGGTACGCCGTGCGCGCCGCCGTGAGAT  
GCAGCATTTGAAGCATGCCGCCGACCATTTAGCTTCGCGCCTTTCAGGAAGAGTTTCGA  
GGAGGTAATTAATTTAATTACCACTTGTTACATGCATACTGCCACTTTTCTGTATACATA  
CTGTATGAATCTTTGATCAGTTTTCGGAGTAATGCTGGTTAGGTTACGCATCCTAATCAG  
TTTCTCTCCAAGTAACTGCTGGTTAGGTTCTGTGCCGTTTTCTGCATGCATCTTAATCA  
GTGCACGTCATGCAGATCATGCAAAATTAACCATGGTCCATATTCCTCATGCACGCATGCAT  
GGATATATATACACTCGCTCGCATGGATATATACTGACTTTCTGTTTTTCTAGGTGCAGA  
TTGGGATACATATACTTTCTGTTTGATTAGATGAGCTTCCTTCAATTTGTTGCGTATGGA  
TGAGCGGTTTGGGGCGGGTAGCTGACCAAAATGTGTAGGATGCGCCAATTTAAAGCAAAA  
GATGAGCTACACATCACACAGCAGCATGGACCTTTTAGTTCGAGCCTCACATCATTTTA  
CTCAGATTGCAAGCAACCCTAAAACCATCCACGATCCACCCACCGTGAAAGCAAAAATA  
GTAATATATATAATTGGCCCGGTCTCATTCTTTCAATTATTCCAACCAAAAAATGTATAT  
TTCAAGAAAGTCAAAATAATATACATACTACTGTAACATACATACTAACTGAAAGGGAGT  
GATAAAAGACAAATATAATGGGAACATTATGCATGTATGTTAGTTTTATAAAAAACATTA  
TGCATGCATGACATGGAATTTTTCCATTTGTTTGCATCAAACAGGTTGGTATAAGTGGTG  
ATCAGGTACACTCCAATCAGCTTGGGAGGTGGGAGCAGCAGCATGCTGGCCAGGAACAAC  
AGCCGCACCGGCCGTTGCTTGCAACCACGACGGCGGTGCCTGCCACGGCCTTCCTGATCA  
GCCGGCCGACGAACCTGTATCAAAATATAGTGCCACCAGCAATGCAGCATGCATCTGTG  
TTCTTGATCATGATCAGTTCCACGTGCCAGCAATCCTTCTCCACCACGACAAATTTAGG  
TGTGATTTTCATCTCATCTTATACATTTTCTCCTCAAATAAAACATTTCCATTATCTAAAA  
TAATTCCTAAAATTAATACTAATTTCTCTTTTTCTAGCAGCTGGGTAATAGATTGGGCA  
CGGTAGCTGTTGAAAAAAAATAATAGGAACACATATATGCATGCATTTATGAAGAATAT  
TCTTTACATATTCAGAATGTTAAATTTAAGTAAGGAGTAACAAACCATCTCCAACAAAA  
ACAATTTAGCTTGAAAAACAAGCAATGGACTCGCTAGGCAGTACATTTTCACTTCCCAT  
CTAGACAACTTAATTAGTACGGCTTGGTCTAAAGTCCACATTTTCTCCTTCAAGCTAA

GAGTTTCTTGCTATCATAGGATCCCTTTGAATTCTCTAAAAATAAACTAAAAACCATTCT  
 CAGCTTTCAATTTCAATAAAAAAGAATCAAGGATTTGTGATAATCTTAAGTGTCAAAATTA  
 GTCATTTTTAGTTGGTCATACTAAACATATTGGGCAATAATTTATACAAATAATTGTGAT  
 ATACAAAATATTAAAAAAAATTCTAGTTATGGCACTTCTAATGTTGATTTGTACATATGT  
 AGGGTTTTTCAAGTCGTGTAATTACTATTTGATATGAACTATGTTTTTTTATATATATAC  
 CAAGGAAGTTGCATATGGATGAAATTAAGCTGTCTGAAGATGCATTTTCTAGACTATAAA  
 TATAGAGCCTAGACAATTCTGGAAGGATTCTTTGTTTACCCATATATATATGTGTAATCT  
 GGTAAATGAATCTGCTTTGTATTTCCACCGTTCCCTATATATATGTATCACTTTAGGTAAAT  
 CTATATACAATTGAACTGTTTATTTTCATATATATCAAGATACTAATGCATTGTCTCAGCT  
 CATTCTTCATCTCTTTGGTGATTTACTTAATTATATTATTGTAGCTCCTTTACTTTTTTT  
 TTTCGTTTTGCTCTTTACTAAAAGAAATGCTTTAGCTACTGTTCTATCCCAACATAATTAAC  
 AACGAACATGCAACACAGCAGCAGCAGCAACAAAAGCTTGACAGGAGGTCTGCCGGCTTG  
 GAGGAACTGATAATGGGCTGCACGTCTTCGAGCACAAAAGGAGTAAGTTTCTCTTGCAATT  
 TTTATTTGATTGCCTCCTCAGCATGGATCCAAGCCGATAATTTACCAGTCAGAGGCTCTA  
 CGCATGCAGTAAAGCATTCCTGCACATATCCAATTGGAATTAATATATATGCATGTACGT  
 AGCAATTGCATGTGAGACGCATGCATGTGTCCCTTTTAAACGGTTTTAATCTGAACATTA  
 GCTCAGGCCAAATTTAATATAATTGTAGTTATTTATATATACTGATTTAAACATATAATA  
 CATGGGTGGGAAAGCTGCAAGCTATGTCTTATAGGCGAGGTGAGGGGTTTAGAAAAGAAA  
 GACTGCTCAGGAGGGTCCCTGAGGAACTTCAGTGTGGGGCCTCATAGTTTCTTTGTCTC  
 CTAGCCAGCACTTTGAAACAGGCCCTTCACCTTGACAGCTTTTTCTCTCATTTGTTTCC  
 CTATTTTTAAATTCGCCATTTTAGGTGTGCTTTTACAGCAAGCATGCCGACGAGAGAGAG  
 AGAGAGAGAAATCTTCAGTACTCCTAGTGAGATAGTAGATAGAAGAAACATCATGAATAT  
 ATGCAAAACAAGGACCACCCTTTGCTTTGCTTTTGAGTGCCAAAGGGGGAGAGCCAAAGAC  
 CAGCGTAAAAACAAGACCATACTTTCCTTGCTTTCATGACCGTATAGGTGAAAACGAGAG  
 CTTTCTCTCCATGTCAGTAGCCCCCTCCTCGCTTTTCTGACTGTATGGCTATAAGAATA  
 GTTGTTTACTGTTATCTCTTGCGAAAAGAGCAAAAAGAAAGGAGGAAATATTATTCGTTT  
 CTTGCTCTCTTTTGCTCTTTTCTATGAAATGAATTCACACTGACACCATGCATGAGGAT  
 AAGAGAATCATTATTGTGAAATTTGTTTGCATTAATCGTTGTGAACCTGTTCTTGATTA  
 CATTACTAAAAATTAATAATCTTGACATTTACAAGGTAGTATATACATGCACGTTCAAGTA  
 ATATAGAACAAAAGTGTACTTATTTTTGTCAAAACTCCATTGGATGATTAGACATGAGTA  
 GTACATCCGTCTCAAAATATAATAACTTTTAGCTACGAATTTAAACAAGAGTATGTCTAG  
 ATTCGTAGTCAATAATTGCTATATTTTTCGAACAGATCAAGGTAGTAATGATATGTGTATT  
 GCATAGTTATTCAATGAGATCGTTCTTTGACACGTTGGCCTCATTAATAATATGGTGCAA  
 TCGGTTATATTGGAGATCAATCATTCTGACCCCGACTATATACTCCGTATAAGTAAGTGA  
 CAAAAAGAGTTATGCCTTACTACTTTTCCCCCTCCTTTGTTTTTCGCGTTGAATTATATGGG  
 AGATTAATTAATAAAGTACTGTGACAACACAACATAAGTACTACTAGTCTACTACCGTGG  
 TATCTGCTATATCTCTCACAAGAGATCCGAATTGGCTACCTTGATATTATTTAAATGAAC  
 ATTTCTGGTATCATCTGGAGTGTAATAAGAGCAAGTACTATAAACTTGCTCTAAGGTA  
 GTCCGTACTTGAACAGTTGAAAATTTGAATTATTTCCCTACTGACATTTTAAAGTGATA  
 CCGTATCTTTCTTATTCAACTGTTGCACTTCACTGAGCTGTTCTTTTTTGACCCCCCTT  
 TTCCATATTCTATTGCAGGAAGCTTCAATTCCTCACTCCCAAGAGACAGAATGGCCTTAC  
 CAGCCATACTGGACTCCTGACAACCAGGATCATCATGGATAGTAGCAACAAGGCTGGTAA  
 ATAGTGAAGATCAATACCAAAAAGAAAATAACCACATTCTCTTTCACCTTGTGTGGTCTC  
 TGTCTTCTTGAATATACAACATTGCTTTCTTGAAGAATGTATGTACTACGGTTGGGAGAA  
 GAAATAGATTAAAGAGATCTGTATAGATCTGCCTCCATGAAAAAAGGGAGATCAAATTAA

CTGTGCAAGGACACTCCAAGATAGAAGAGACAAAGTTGTTGAAAGAAAAGAAAAGAGAGG  
 ACAAAAAAAGTTTGGGCAAAGGTATTGTTGTGCTTAATTACATCAGAATGAAGGCTAGAC  
 ATGCTAGATGCAGTCAATATTAATGCACCCCAATCGAAGCATAATTATAATTACATTTTG  
 GTTTATCACAGCTTTTGATATGCATTAGATATTTTTCAACTGTAAAAAGTAGTATTGTTT  
 GCATGTACTGTGATGTACATTACACCCCTGGCCGGTCCCTTCTCTCTCTAGATGGGTGT  
 GTGCGTGTGTGTTTTTACCTTGCTTACCTTGCTGCTTCAAATGCATCCAGGGGGACTAAA  
 TTCCCAACTTAATAAGTTCTTTTTCTTTCTAGAGGCGCAAAAATTGTTTAGCGTTTGGG  
 TACTGATGCTACTTACTTTGTAACGAGAGTTGAATTCATCTGCCATGCATGTTGGTTTCA  
 AGGAATAAACTGGCGTTGACATGCATGATTTTTGTGGTCTATATATATCACATATATATC  
 AGATTACTCGATGATCTAACTAGTTAGTTTACTGCTGTACCTGTACATATGGATTTAAGA  
 ATCAGAGTGGTGTGGCTATATATTAAGAGTTATGCTTGCATACTGATACTGATGTACAT  
 ATACGTAAGCACAGAAAAATTCCTTTGTTTCATGTAAAAAATATCAGCTCTCAATATAGAC  
 ATGTGTTGTATTTATACAATTAA

# CDS

>ONAC003

ATGTACACCTCTCCCACACTCCTTGCTCTCTCGTTTGCTCTTCTACTGCTCATCCTCCTC  
 CTCTACTACTCGTCCTCTTTGCTCTATTACAGCTAGCAACAAGAAGGAGGCTTACACAT  
 GCATGTGCACGGTCTCTGCCGGACGCATATGAATCAGGCATGAATAGGGGGCACATCAGC  
 AGCTCGGAGCTCATCGACGCCAAGCTCGAGGAACGCCGGATCTCCACGGCCAAGCACTGC  
 CCCAGCTGCGGCAACAAGCTCGACTGCAAACCGGATTGGGTGGGGCTACCGGCAGGAGTC  
 AAGTTCGATCCGACGGACAGGAGTTGATCGAGCACCTCGAGGCCAAAGTGAGGGAAGAA  
 GGCTCAAGATCTCATCCTCTCATCGATGAGTTCATACCCACGATAGAAGGGGAGGACGGC  
 ATATGCTACACCCACCCTGAGAACTTCCAGGTGTGACAAGGGACGGCCTGAGCAAGCAC  
 TTCTTCCACCGGCCGTGCAAGGCGTACACGACGGGGACGAGGAAGCGGCGGAAGATCCAG  
 ACGGAGTGCAGCTGCAGAAGGGGGAGACGAGGTGGCACAAGACCGGCAAGACCCGGCCG  
 GTGATGGTGAGCGGCCGGCAGAAGGGGTGCAAGAAGATACTGGTCCTCTACACCAACTTC  
 GGCAAGCACCGCAAGCCGGAGAAGACCAACTGGGTGATGCACCAGTACCACCTCGGCGAC  
 CTCGAGGAGGAGAAGGAAGGGGAGCTCGTCGTCTGCAAGATCTTCTACCAGACGCAGCCT  
 CGGCAGTGCAGCTGGTCCTCCGACCGCGGCGGCGCGCCGCCACCGCATCCGCCGTG  
 ACGACGGCGGCGGTGCAGCAGGATCAGCAGCGCAGGAGGGACAGCGGCAGCGGCAGCTGC  
 TCGTCGACGAGGGACCACGAGGTGTCGGCGACGTCCTACTCGACGGCCGGGTACGCCGTG  
 GCCGCCCGCTCGAGATGCAGCATTTGAAGCATGCCGCCGACCATTTAGCTTCGCGCCT  
 TTCAGGAAGAGTTTCGAGGAGGTGGTATAAGTGGTGATCAGGTACACTCCAATCAGCTT  
 GGGAGGTGCGAGCAGCAGCATGCTGGCCAGGAACAACAGCCGCACCGGCCGTTGCTTGCA  
 ACCACGACGGCGGTGCCTGCCACGGCCTTCTGATCAGCCGGCCGACGAACCCTGTATCA  
 AATATAGTGCCACCAGCAATGCAGCATGCATCTGTCGTTCTTGATCATGATCAGTTCCAC  
 GTGCCAGCAATCCTTCTCCACCACGACAAATTTAGCAGCAGCAACAAAAGCTTGACAGG  
 AGGTCTGCCGGCTTGAGGAACTGATAATGGGCTGCACGTCTTCGAGCACAAAAGGAGAA  
 GCTTCAATTCTCACTCCCAAGAGACAGAATGGCCTTACCAGCCATACTGGACTCCTGAC  
 AACCAGGATCATCATGGATAG

# Protein

>ONAC003



MYTSP TLLALS FALLLL ILLLYSSSLYSQLATRRRLTHACARSLPDAYESGMNRGHIS  
SSELIDAKLEERRISTAKHCPSCGNKLDCKPDWVGLPAGVKFDPTDQELIEHLEAKVREE  
GSRSHPLIDEFIPTIEGEDGICYTHPEKLPGVTRDGLSKHFFHRPSKAYTTGTRKRRKIQ  
TECDVQKGETRWHKTGKTRPVMVSGRQKGCKKILVLYTNFGKHRKPEKTNVWMHQYHLGD  
LEEEKEGELVVKIFYQTQPRQCSWSSDRGGGAAATASAVTTAAVQQDQQRRRDSGSGSC  
SSTRDHEVSATSYSTAGYAVAAVEMQHLKHAADHFSFAPFRKSFEVVGISGDQVHSNQL  
GRSEQQHAGQEQQPHRPLLATTTAVPATAFLISRPTNPVSNIVPPAMQHASVVLDDHQFH  
VPAILLHDKFQQQQQKLDRRSAGLEELIMGCTSSSTKGEASIPHSQETEPYQPYWTPD  
NQDHHG\*

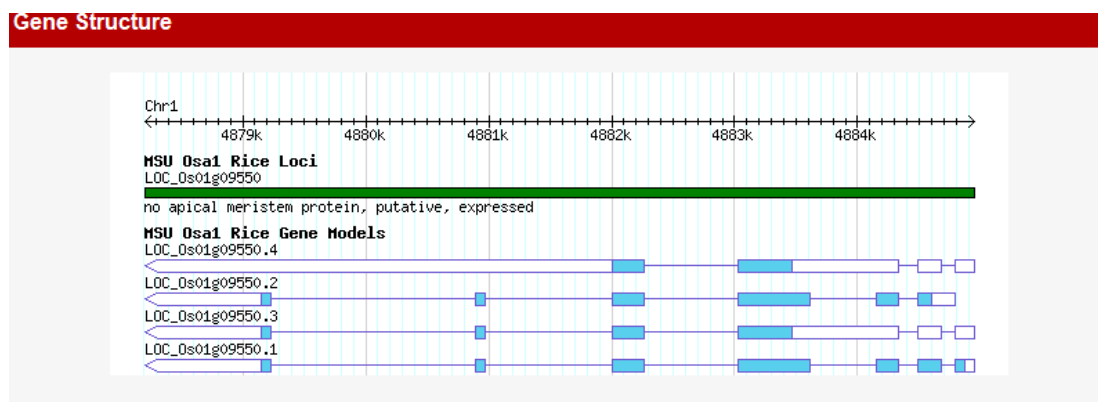

### LOC\_Os08g42400 (ONAC005) sequence information

**Genomic sequence length:** 3530 nucleotides

**CDS length:** 699 nucleotides

**Protein length:** 232 amino acids

## Genomic Sequence

>ONAC005

AGTGCTTGCCAAATTCGGAGAAGGCATCGAGCTGAAGCCACAGGGCGATCGATGGAGGTGA  
GGTGAGGAGGAAGAAGAAGACGAGATGGAGTTGGAGTGCACCTTCACGCCACATGAGGGAG  
ATGCTATAAAATCCCTTCTCCCTTTTCAATTTACACCCAACACCCAACCCCTCTCTCTC  
TCTATCTCTCTCCTCTCTCTCTCTCTAGCTCTAGCTCTAGCTCGTCGCCGCCATGAACGT  
TCCAAGCAAATGCATGGCTCCTGCAAAGTAAAAAAGAAGAAGAGCAGCAGCTGCAGCT  
TCTCTTCAGTATCGATCTTTAACTGTATCGAGCTAGCTTAGCTTAGCTTAGCTCTCTGCC  
ATTAACCTGTGCTTCACTGAGCTTGAGCTAGCTAGCTTCTTGCGTGTGTGACTGAGTAGC  
TCTAGCTCCTCGTCGTCGTCGTCGTCGTCGTCGTCGTCGCGCGTCGGTGGTGGTGTGAATT  
GATAGAATTGATACGATGGAGAGGGCGGCTGCGGCGGCGCCGGTGGTGGTGAGGCATGGA  
GGAGTGGTGTGTCGCCCGGGGTTCAAGTTCACCCGACGGACGAGGAGCTCGTGGTGCAG  
TACCTCCGCCGCAAGGCGTTCGGCCTGCCGCTCCCCGCCGCCGTCATCCCCGACCTCCAC  
AACCTCTTCAAGCTCGATCCCTGGGACATTCTTGGTACGAATTCTTGACGACGACGACGA  
TGTCGAGATGGCACCATGAATGCTTGTTGATTGATTTCGGTGTATGTGTGATCCAGGTGCG  
AGCAGCGACGGGGACAAGTACTTCTTCGCCGTGCGGCCACCTGCGGCGAGGGGGAGGAGG  
CAGCATGTGACGGCGAGCGGTGGGTGCTGGAAGCCGGCGGGCGGGCGGGACAAGCCGGTG  
GTGGTGGCCCCGGTGCGGCGGGAGCCACCTCGTCGGCGTCAAGAAGGGCATGGTGTTCGTC

CCACGGCAAGGGAGGAAGGCACCGGCGGCGGCGGCGGCGGCCGCGGCGGTGGCTGCTGG  
GTCATGCACGAGTACAGCCTCGCCCTGCCGATGCACAAGAAGGTGAGAAACCACTACTAA  
TCAATCATATGAGCATATGATTTCTCCTTAATGATTGATTAATCACTCTCTTGATGACT  
AGTTGACTGCCAATTTGCCATTTCTTCATGCAAGAACTGATTGTGTTTGTGATTGATT  
TGTTTTCTTTCTTGATAAATCTTCTTGTTGTTTCTGCATGCATGCAACTCAAGTGAGCAAG  
CTTGATAAATCTTCTTGAGCATTAAATTTGGGATCCAATATTAAGCTCAAGCTAGCTTAGC  
TTAGCTTCTCAAAGTGCTACTACTAGCTAACTTGATCATATGTTTGCTTATCACTATTTT  
TATTAGTTATTTTTAAAAATTACTAGCTATATGGCTTTCAAGATCATGTCACATGCTCTCC  
ATTAGCTTAAAGCTGTATATTTGTCTTAAATTACTAATTAGATAATTCTGATAGCCACAG  
CATAGGTACAAATCAGTTAACCAGTCAAGTACTATGCTAGAATTTGCCAATAAATAAAAC  
AAAAAAAAACCCAGTTCAACACAAACTTCTCAGCCATAACTAATTAACCGAGGAGCATCAT  
ACAAATTAACACATACAGGCAGGGTACAGTCTGCACATCAAAGTGCACAACATGCTCAT  
TAATAGTCATGATCAACAACAACAATAACTCGCAGTTTTAAATTGCTTCTGATGGTGGTT  
GCAATTCATCCTGACATGGAGAGGTGGCTGTACTAGATGCTCTCTGCTCATCAGATCGAA  
TCGTCTCATCAAGTTGTGCAGTCCACTACTACCAGTATCTGCTAGTACTAGTACTACTA  
GCCACTCTCTTGATATATGCAAGAACCAACCAACCAACCCAGCAGCATCCAATTAAGC  
TGACAAACAAGTAGTACCTCAGGCTATTAATCATGTTTGTGGGATTACATTAACATAATG  
CTTAATTAGCCAGAACAACAGTGTTCCATGCCGTGCTCCTGTGTCTGAACAAGCTGGGGCC  
TGTATATATTTCAATGCTGTCCAGTAGATCGACCAGTGCTGTTGTGGCCAGTTCTGTGGC  
CACTGTTGAAGATATGTGCAGTAGATGTTTCATGCTCGTTTTTGATTGAGAGAATCTTGAAA  
TTAAACACCTTGCTGGCAATTAGTTTGATTGACAAGCTGTACTTGAATGCTACATCTCG  
TATATCTACTTTTTTTTTTGAAGAAAGATGCTTGAATGCCCTAGAATTCATGTAGTTATA  
TTTTCTGAAGTTTGATCGTAAATACATATATAAAACCATCTGAACTTGTTACATGAAAAT  
TATCATTGCAATTGTCATTTAAAAAACTTTCATGATATTAATTTTGCTAGTATATTTAG  
TGAAAAATTAATTAATTAGCCTGGATTAGTACATAGTGTAGTAGGAGTAGCTAGTACCA  
TTCCTTGCAATATCACTACTAATGCTAACACTGTGTTTCACTGCTGTTGCTAGAACAGAC  
TGAACAGTAGGATTTGCACTTGAATTTTCAGCATATATTAATAAAGTACAGAGGATAG  
AATTCAGAAAGAAAGACCATAAAATTTGAACAGTTTTTAGGTTGCTTAAGCTTGTGTGTC  
CTTTGTAAACAATGTGAAAACACAAAAGAGTATTTCAAGAAAAAAGGGAAAAATTA  
AAAAATGAGTACATGGACAGAAACAACCTGAAGTTTTCAAACACAGCTAAAGCTGGAATG  
TTCTTAGATCGATGAAGCTGACATATTTTTTTTTCTGATTTGTGTGAACGATCTCTGCAG  
GGTTGCTTGGCTGAGGCTGAAGAAATGGGTAGTGTGCCGATATTTAGAGGAGCAGCAGC  
GGCAGCCGGTCGCCGAGGAGGCTGACAACGACGTGAGGCGAACGATGCCGGCCGTCGCC  
GAGCTCGGCCGGTCGCCGTCGCCATCGTCGTCGTCGCAATCCAGCTGCGTCACAAGC  
AGCTCCGACCAGGAAGAGGTCAGCAGCGGCTAGCTAGCTGAAGAAGAATGCAGGCAGCAG  
CAGCAAGCAGCTAAGCTGCCTCTCAAAGAGAGGCTTGAGTGTTAGCCTAGCTAAGCATAT  
ATATTTATAGCCGGCCAAACCTCTGAAAGTGATCTGCATCAATGCATGCCCCCTTTAA  
TTTCTTCTCCTCCTTAATATTTTTTCCCAACCATGTAATGTAATGTAATTAATGTAA  
TGCAGTGTAATGTAACGGGAAGGAAGCACTGAATTAATCAAATTAATTAACAAATGAAG  
AGTGCTCAAAAGTCCAAGGAAGCTTCTAAGGTTTCAGGAGCCAGATATTATCTACTTAATT  
AATTAATTATGGGCACATATCTGTAGTTGCTAGCTAGCTGCATATGCATCTCGTCGTTGT  
CGATCCATTTGTAACCTTGCAAGTTGTGTTGGTGTAAATATTGTAATATTTTCTCCGATGG  
TTGAGAAATTAATCTGAAATCCATTATAGCAATTAATTGCAACTGTTGCA

>ONAC005  
 ATGGAGAGGGCGGCTGCGGCGGCGCCGGTGGTGGTGGAGCATGGAGGAGTGGTGGTGGCG  
 CCGGGGTTCAAGTTCCACCCGACGGACGAGGAGCTCGTGGTGCAGTACCTCCGCCGCAAG  
 GCGTTTCGGCCTGCCGCTCCCCGCCGCCGTATCCCCGACCTCCACAACCTCTTCAAGCTC  
 GATCCCTGGGACATTCTTGGTGCGAGCAGCGACGGGGACAAGTACTTCTTCGCCGTGCGG  
 CCACCTGCGGCGAGGGGGAGGAGGCAGCATGTGACGGCGAGCGGTGGGTGCTGGAAGCCG  
 GCGGGCGGGCGGGACAAGCCGGTGGTGGTGGCCCCGGTGGCGCGGGAGCCACCTCGTCGGC  
 GTCAAGAAGGGCATGGTGTTCGTCCCGACGGCAAGGGAGGAAGGCACCGGCGGCGGCGGCG  
 GCGGCCCGCGCGGTGGTGGTGGTGGTGCACGAGTACAGCCTCGCCCTGCCGATGCAC  
 AAGAAGGGTTGCTTGGCTGAGGCTGAAGAATGGGTAGTGTGCCGATATTTAGAGGAGC  
 AGCAGCGGCAGCCGGTCGCCGAGGAGGCCTGACAACGACGTGAGGCGAACGATGCCGGCC  
 GTCGCCGAGCTCGGCCGTCGCCGTCGCCATCGTCGTCGTCGCAATCCAGCTGCGTC  
 ACAAGCAGCTCCGACCAGGAAGAGGTCAGCAGCGGCTAG

Protein

>ONAC005  
 MERAAAAAPVVVRHGGVVLPPGFRFHPTDEELVVQYLRRKAFGLPLPAVIPDLHNLFKL  
 DPWDIPGASSDGDYFFAVRPPAARGRRQHVTASGGCWKPAGGRDKPVVVARCGGSHLVG  
 VKKGMVVFVRQGRKAPAAAAAAGGGCWVMHEYSLALPMHKKGCLAEAEWVVCRIQFRS  
 SSGSRSPRRPDNDVRRTPAVAEELGRSPSPSSSSSQSSCVTSSSDQEEVSSG\*

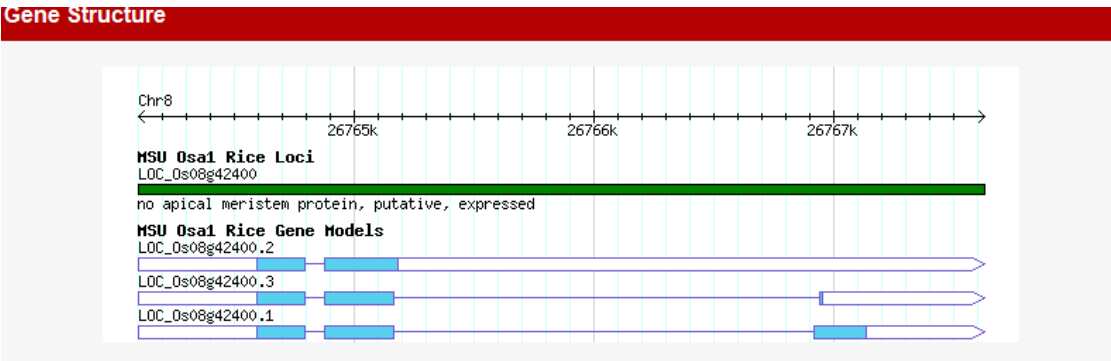

LOC\_Os03g42630 (ONAC006)sequence information

**Genomic sequence length:** 1985 nucleotides

**CDS length:** 972 nucleotides

**Protein length:** 323 amino acids

Genomic Sequence

>ONAC006  
 ATGGACATTAGCTAGCTCAGCTCAGCTCACTGCCACTGCCGCTCTGCCTGCCGGCGATCG  
 AGGAGAAGACCGGCCGGCGGCGAGCTAGCAGGAGAGGGCTAGTGATGGAGGAGGGTTGC  
 CGCCGGGTTCCGTTCCACCCGACGGACGAGGAGCTGGTGACGTACTACCTCGCCCGCA  
 AGGTCTCCGACTTCGGCTTCGCCACCCGCGCCATCGCCGACGTCGACCTCAACAAGTGCG  
 AGCCATGGGACCTCCCCAGTAAGTCTCTAGCTAACTCTTCGATTTTCGATCCCCAGTAAGT  
 GTGTTTAGCTTTAAAAACGAGTTTGAAGGGAGAAATTGTGAGCATATTGAGGATTGAAC  
 ACGGAACATTCGCGGGTTGAAATTGAAGTGCATCTCTAAATTGTGTTTAGCTTTGATTCA

GCGAGTAATATAATATGCATGAATATGTCGTCCATTAATCATTCTTTGATCTGCAAGTTG  
 ATTTTAGGGGAAATGTAGGCTCTTCTGTGTCCCTTTTCGGACTTGTTCAAGAATTCCCTTT  
 TGAGAAGAAATGCCAAAGGCCCTGCATGCTTTCATAGAAAGCAGAAGACTTGTTCAATAA  
 TTCTCTCCTTTTAACTCTATACACTTTCTTCGATTAAGCTTTTTCTTATTCTCAGACTCG  
 TTCTTTCTGATTGGTGAGAATTGCATTGCCCTCTCGTACCTTTATAGTTGCACCCGAAAA  
 TTTTAATAAAATTTCTACACGTGCACTTACATTATTATCGAATTGTACGGGTGTAGTTTA  
 GTGGTCACTGGTGATCATATCACTGCATGCATACACTACAAATGCACACGTACAAATGAA  
 TGAATTGATCAATCGTTCTTACACATGAACGCAATGTTGATGGATGTGATATGCAGGCAA  
 GGCAAGCATGGGGGAGAAGGAGTGGTACTTCTTCAGCATGCGCGACCGCAAGTACCCGAC  
 GGGGATCCGCACCAACCGCGCCACGGACTCCGGCTACTGGAAGACCACCGGCAAGGACAA  
 GGAGATCTTCCACGGCGGCGCTCGCCGGCATGAAGAAGACGCTGGTGTCTACCGCGG  
 GAGGGCGCCCAAGGGCGCCAAGACCAGCTGGGTGATGCACGAGTACAGGCTCCAGTCCAA  
 GTTCCCTTACAAGCCCGCCAAGGACGAGTGGGTCTGCGCGCTCTTCAAGAAGCTCCA  
 GTGCCACCTCGCCAAGCCCCGCCGCCGACGACGCTCGACGGAGACGGCGCCTCGCC  
 GCCGGAGATGGTGGACGCCTCGTCGCTCGGCGAGCTTGGCGAGCTCGACGTCTCCTCCAT  
 CCTCCTCGGCGGCTTCGCGCCGCCGTCGGGCGAGCTCTGCCATGGCGGCGGCGGCGGAGA  
 CGGTTTCGGCGCGCACAGGCTTCATGTCGGCGCGTACATGAGCTGGCTGCAGGCGGCGGC  
 GGCGGCCAACCAGGGCATGTTCCAGTGGCCGGCGGCCACGCAGGCGGGGCTGGTCGGAGG  
 CACCGTGTTTCGCGGCGGCGCACAAGGCGGCGGGGACGATGCCGTTTCGGCGGCGGGTGCAG  
 CCAGCAGCAAGCGCGGGACGTGGGCGTTTCTCTGGCGAACGTAGGAGGAGGCGATGCGTT  
 GTTCGGCGGGGCGCCGCTGGCGAAGGTGGACATGGAATGCGGCGAGCAGGCGCCGACGCT  
 GGACATGGACGACTCCACATGGAGAGCCTTCTGAACATGGCCACGCCACCATCAATTTGG  
 ATAATTATTAAGCAAACCATGCATACACGTATTATATACTCAGTTATATACTAGATGAAG  
 AATTAATGTGGTCGTCATCCAAGATATCCACAGTACAGTACACTACAGTCAGTTATTAAT  
 TAATTAATCAAAAATGAAAGTGTAGTGTGTGTCACCTAGAAAAAATGTGCCGAAAATATTT  
 TGGTGGAGACGGGGCCCTCAAGTTTAATACAAAGCAGTAAGTCTATTTTGCATACTCATC  
 TTTTA

#### CDS

##### >ONAC006

ATGGAGGAGGGGTTGCCGCCGGGGTTCCGGTTCCACCCGACGGACGAGGAGCTGGTGACG  
 TACTACCTCGCCCGCAAGGTCTCCGACTTCGGCTTCGCCACCCGCGCCATCGCCGACGTC  
 GACCTCAACAAGTGCGAGCCATGGGACCTCCCCAGCAAGGCAAGCATGGGGGAGAAGGAG  
 TGGTACTTCTTCAGCATGCGCGACCGCAAGTACCCGACGGGGATCCGCACCAACCGCGCC  
 ACGGACTCCGGCTACTGGAAGACCACCGGCAAGGACAAGGAGATCTTCCACGGCGGCGCG  
 CTCGCCGGCATGAAGAAGACGCTGGTGTCTACCGCGGGAGGGCGCCCAAGGGCGCCAAG  
 ACCAGCTGGGTGATGCACGAGTACAGGCTCCAGTCCAAGTTCCCTACAAGCCCGCCAAG  
 GACGAGTGGGTCTGCTGCCGCGTCTTCAAGAAGCTCCAGTGCCACCTCGCCAAGCCCCGC  
 CCGCCGCACGACGACGTCGACGGAGACGGCGCCTCGCCGCCGAGATGGTGGACGCCTCG  
 TCGCTCGGCGAGCTTGGCGAGCTCGACGTCTCCTCCATCCTCCTCGGCGGCTTCGCGCCG  
 CCGTCGGGCGAGCTCTGCCATGGCGGCGGCGGCGGAGACGGTTTCGGCGCGCACAGGCTT  
 CATGTCGGCGCGTACATGAGCTGGCTGCAGGCGGCGGCGGCGGCCAACCAGGGCATGTTC  
 CAGTGGCCGGCGGCCACGCAGGCGGGGCTGGTCGGAGGCACCGTGTTTCGCGGCGGCGCAC  
 AAGGCGGCGGGGACGATGCCGTTTCGGCGGCGGGTGCAGCCAGCAGCAAGCGCGGGACGTG  
 GCGTTTCTCTGGCGAACGTAGGAGGAGGCGATGCGTTGTTCGGCGGGGCGCCGCTGGCG

AAGGTGGACATGGAATGCGGCGAGCAGGCGCCGAGCTGGACATGGACGACTCCACATGG  
AGAGCCTTCTGA

#### Protein

>ONAC006

MEEGLPPGFRFHPTDEELVTTYLARKVSDFGFATRAIADVDLNKCEPWLPSKASMGEKE  
WYFFSMRDRKYPTGIRTNRATDSGYWKTGKDKEIFHGGALAGMKKTLVFYRGRAPKGAK  
TSWVMHEYRLQSKFPYKPAKDEWVVCRVFKKLQCHLAKPRPPHDDVDGDGASPPMVDA  
SLGELGELDVSSILLGGFAPPSGELCHGGGGGDGFGAHLHVGA YMSWLQAAAAANQGMF  
QWPAATQAGLVGGTVFAAAHKAAGTMPFGGGCSQQQARDVGVSLANVGGGDALFGGAPLA  
KVDMECGEQAPQLDMDSTWRAF\*

#### Gene Structure

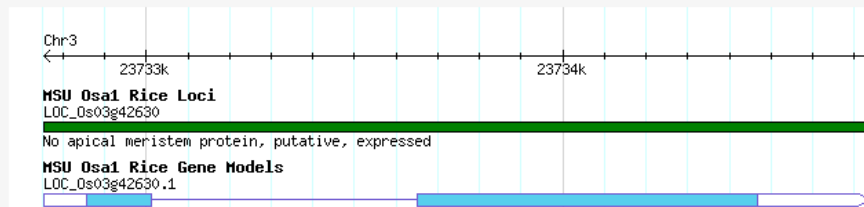

#### LOC\_Os06g04090 (ONAC007) sequence information

**Genomic sequence length:** 3489 nucleotides

**CDS length:** 1188 nucleotides

**Protein length:** 395 amino acids

#### Genomic Sequence

>ONAC007

TTGTACCCCATCCGAGATCAATATCCATCCATCCATCACCACCTAGCAGCTCTACACCTC  
TCTCTTATATTAGCTCTCTCTCTCTCTACCCCCATTGCTCATCTCCTTCTAGCTT  
CCAGCTTAATCCCTTCCTTGTCATGTTAATGGACAACTCTGAGCATTGCACTACCCAT  
CATCTCCTAGCTAGACTCACCTTAGCTTGTCTCTCTGCTGCTCCAGTGTGTGATTCTTTC  
TCCCATTTCCTGTTTGGTTTGCAGTGAACAAGCAATTAAGCTTGGTAGTAGTAGTA  
GTTGTTGTATTGATCGATCGATCGATCTAGAGACGACGATGAGCATATCGGTGAACGGGC  
AGTCGGTGGTGCCACCGGGGTTCCGGTTCACCCAACGGAGGAGGAGCTCCTGACATACT  
ACCTGAAGAAGAAGGTGGCCTCGGAGCGCATCGACCTCGACGTCATCCGCGACGTCGACC  
TCAACAAGCTCGAGCCATGGGACATCCAAGGTACGTAATTAAGCACACACATCGATCA  
ATTGATCGATTTTTGACATGTTTTGATCAATGTGGCATGTGTGTATCATACATACATAT  
GCAGAGAGGTGCAGGATTGGGTCAGGGCCGCAAAACGACTGGTACTTCTTCAGCCACAAG  
GACAAGAAGTACCCGACGGGGACGAGGACGAACCGGGCAACGGCGGCCGGCTTCTGGAAG  
GCCACCGGCCCGCGACAAGGCCATCTACTCCAGCTCCAACCGCATCGGCATGCGCAAAACC  
CTCGTCTTCTACAAGGGCCGTGCCCCCAGCGCCAGAAATCAGACTGGATCATGCACGAG  
TACCGCCTCGACGACCCCTCCTCCGCCTCCGCCTCCGTCTCCGTCAACCTCCCCCTCCTAC  
TACTCTTCCTCCTCATCGTCATCTCCCCAGTAAGTGCACGTAACACGATACATACACTT  
CATCAGGGACACATCATAGTAGTACGAACGACATACACATGACACTGTAGACGGTCCAGG  
GGACAAAATTGGGGCTAAGCTAGAGGTGTAGCTCTAGCTGGGTTTCTTTTCTCGTACAC

GCGGTGGTGAGTGTGAGCGTGAGGTGAGGTGATATATTGGTGGTTGGGAATGGGGCATGG  
 CTACCTCTCTCTCAGAGAGTGGCAGCGTTGCTTTCCTCACTCGCTGTCACAAAAGGGGGG  
 TAGTGGGTGGCTTCACTACTTTTTCCCTCAAGGGAGCAAATTATCAAGCTAATTAATACT  
 ACCTCTCTAGCTTATTATCAATGAGAAAATAGATTGATAGATAGATAGATAGATGAATATA  
 ATGGATCATTGGGGGGGGCGGCATATGCTTGTGGTTTCATGATCAGATGGTTGGTTGATG  
 AGGTGAGGTAGGTGTAGGAGAGCATTTTGGGGTCAAGGCAGCTAAGCTAGCTAAGCTCT  
 AGATAGGGGCAGATTTGTTTCATCGAATCTGCATGCTCACCAGCAAGATCACAACGTGTAC  
 TACTACACACATGCCCAATATGCCAATGCAATGCCACCCAACCAACCAAAACCACATCCGT  
 AACTGAAACTACTCGTACACAAAATGGCAAGAGAAGTAGCTAGAGAAGTAGTAGAAGTTG  
 TTGTACGTGTGTACTAGTATTACTACAATATGTGATCTGCATGCATGGCCCCGTTAAGAG  
 TTAGTTAACGAATTGGGAGCAGCTAGGAGTGGACTTGTGCACTCCAGGACAACCAGCATA  
 TGACAAATCGCCATGACTTTCCTGAGATTTTGTCAACTTGATTAGTAACTAGCATGAAG  
 AAGGAGGATGATAAGCTAGCTTTTGAGCTGGCCATGGCCATAACAGTTTCTTCTTTAGCT  
 CAGCTTGTGGGAAATCTTGCATCTGATTTCAACTCTAGCTAGGGTCGCCACACACTGTGC  
 ATACTTTTTCTGCAAAATGACCTGCAATAACTAGCTTTCATGCCTCGTTCAATCATCGA  
 TCGTTAATTGTGGAAAAAATCAACGATATAGTACATGACACATTGTTAGCTAGTGGAGT  
 ACGATACTGATCTCTTTTAATTATTGCTCGCGGTTAATTGTCTTCTTCTAAATTTTCATCT  
 TGTGCAAGTAAATAATGACACGATCAATTGGTAATTATCGGTAATTAACAGATGCACG  
 GTGTGCGCCGAGACCAAGGAGCTCAGGAGGAAGGCTGGGTGATCTGCAGGGTGTTCAGA  
 AGAAGAACCTCGTGCAACACGGCGGCGGCGCCGCGGCGAGCCACCACGCGGCGGCCA  
 AGCTCGCGGCGGCGGCCATGGAGGGCAGCCCGAGCAACTGCTCGACGGTGACCGTTAGCG  
 ACCACGTCAAGGCGCAGATGCTGCACTCGTCCGCCAGCGACGACGCCCTCGACCACATCC  
 TCCAGTACATGGGCCGCTCCGGCTGCAAGCAGGAGACCAAGCCGGCGGCGATGTCGGCGT  
 CGTCGGCGGCAGCGGCGGCGGCGCTGGAGCAGCACCTCAGTACGCCTCAGTACGGCAAGT  
 TCATGAAGCTTCCGCCGCTCGAGCACGTGCGCGGCGGCGTGGGCCCTCCTGGCGGCGGCCG  
 GCGGCGGCGGCGAGTACTGCTCCGCCCGGACGCGTGGGGATCGCCGACTGGGACACGC  
 TGGACCGGCTCGCGGCGTGTACGAGCTCAACGGCGCCCTCTCCGACGTGCGCTCCGGCA  
 AGAACATGGCCGGCTTCTTCGACGTGTCGATCAGCCCGCGGCGCGCCGCTTCTCCT  
 CCGGCGACGGCGACCTGTGGAGCCTTGC GCGGTGCGTGTGTCGCTACACGCAGACT  
 TGACGACCATGAATAACGTATAATAATTGGAGACAAGAGGTGACGATGGAGATGATGCAT  
 CTAGACGTGGATGGCGTATGCGTGCACTAACTCTACTCTTAATCTGGTCGGTCTACGCAT  
 ATTGCATGCATGCATGGACGACGGTATTGTACGTACGTGATCAATAATTAATTACTAGTT  
 AGGGTTCAGCGAGAGTACAAGACGACGACGACGACACAATAGCTAGCTGAGCTGGCCAT  
 GTGAGCAAGCTCTAGACACTAGGTCAAGATCTAACCGTCGATCGATCTGAGCCGTTGATC  
 GATCGATCGACGATGATGGTGTGATCGATCGAATTATAGTGCAGTGGTCGAGCGAGTTG  
 TTGTGTGATCTGAAACAAGAGAGAGGAAAAAAGAATTAAGGACGTACGGCGTGGTA  
 GGAGAGAGAGAGAGAGAGCATATATAAATATTATGTATCTATATATTGTTATATATTGTA  
 CCTATAGCTTATTATATATCAAAGACATTTTCTAGTGCAGCGAGGTGTGATTTCTTTTC  
 TGATGATCATATCATATATATCATCATCGATCACTGATCACC GTGTGAGTGTACTAATTA  
 TTGTGTGATCGATCGCTCGATGGATGGATTAATAAACTAGTTGTGTGCCTGTGCGCGTGT  
 TTTTTCAGA

CDS

>ONAC007

ATGAGCATATCGGTGAACGGGCAGTCGGTGGTGCCACCGGGGTTCGGTTCCACCCAACG

GAGGAGGAGCTCCTGACATACTACCTGAAGAAGAAGGTGGCCTCGGAGCGCATCGACCTC  
 GACGTCATCCGCGACGTCGACCTCAACAAGCTCGAGCCATGGGACATCCAAGAGAGGTGC  
 AGGATTGGGTGAGGGCCGCAAAACGACTGGTACTTCTTCAGCCACAAGGACAAGAAGTAC  
 CCGACGGGGACGAGGACGAACCGGGCAACGGCGCCGGCTTCTGGAAGGCCACCGGCCGC  
 GACAAGGCCATCTACTCCAGCTCCAACCGCATCGGCATGCGCAAAACCCTCGTCTTCTAC  
 AAGGGCCGTGCCCCCACGGCCAGAAATCAGACTGGATCATGCACGAGTACCGCCTCGAC  
 GACCCCTCCTCCGCCTCCGCCTCCGTCTCCGTCAACCTCCCCTCCTACTACTCTTCCTCC  
 TCATCGTCATCTTCCCCAATGCACGGTGTGCGCCGAGACCAAGGAGCTCAGGAGGAAGGC  
 TGGGTGATCTGCAGGGTGTTCAGAAGAAGAACCCTCGTGACCACGGCGGGCGGCCGCC  
 GCGGCGAGCCACCACGCGGCGGCCAAGCTCGCGGCGGGCGGCCATGGAGGGCAGCCCGAGC  
 AACTGCTCGACGGTGACCGTTAGCGACCACGTCAAGGCGCAGATGCTGCACTCGTCCGCC  
 AGCGACGACGCCCTCGACCACATCCTCCAGTACATGGGCCGCTCCGGCTGCAAGCAGGAG  
 ACCAAGCCGGCGGCATGTGCGCGTCGTGCGGCGCAGCGGCGGGCGGCGCTGGAGCAGCAC  
 CTCAGTACGCCTCAGTACGGCAAGTTCATGAAGCTTCCGCCGCTCGAGCACGTCGCCGGC  
 GGCGTGGGCCTCCTGGCGGCGGCCGGCGGCGGGCGGCGAGTACTGCTCCGCCGCCGACGCG  
 TCGGGGATCGCCGACTGGGACACGCTGGACCGGCTCGCGGCGTCGTACGAGCTCAACGGC  
 GCCCTCTCCGACGTCGCCTCCGGCAAGAACATGGCCGGCTTCTTCGACGTCGTCGATCAG  
 CCGGCCGGCGCCGCCCTTCTCCTCCGGCGACGGCGACCTGTGGAGCCTTGCGCGGTGCG  
 GTGTCATCGTCGCTACACGCAGACTTGACGACCATGAATAACGTATAA

#### Protein

>ONAC007

MSISVNGQSVVPPGFRFHPTEEEELLTYLKKKVASERIDLDVIRDVDLNKLEPWDIQUERC  
 RIGSGPQNDWYFFSHKDKKYPTGTRTNRATAAGFWKATGRDKAIYSSSNRIGMRKTLVY  
 KGRAPHGQKSDWIMHEYRLDDPSSASASVSVNLPSYSSSSSSSSPMHGVAGDQGAQEEG  
 WVICRVFKKKNLVHHGGGAAAAASHHAAAKLAAAAAMEGSPSNCSTVTVSDHVKAQMLHSSA  
 SDDALDHILQYMGRSGCKQETKPAAMSASSAAAAAALEQHLSTPQYGKFMKLPPLEHVAG  
 GVGLLAAAGGGGEYCSAADASGIADWDTLDRLAASYELNGALSDVASGKNMAGFFDVVDQ  
 PAGAAAFSSGDGDLWSLARSVSSSLHADLTMMNV\*

#### Gene Structure

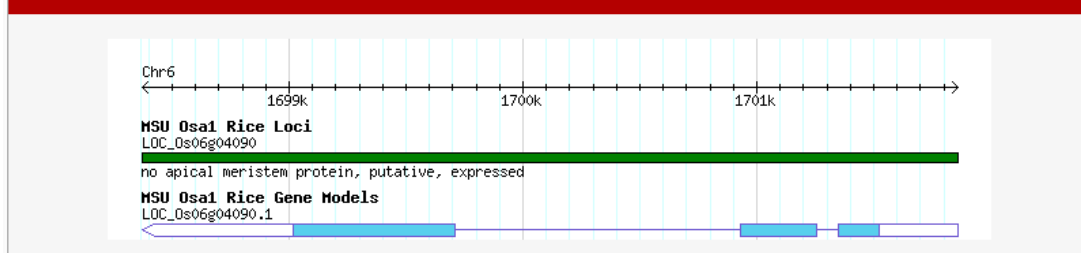

#### LOC\_Os04g43560 (ONAC008) sequence information

**Genomic sequence length:** 2903 nucleotides

**CDS length:** 837 nucleotides

**Protein length:** 278 amino acids

Genomic Sequence

&gt;ONAC008

ACTCTCAAAATTTACACCTATATCTATCTATATTTCTCGTTTGTGCTCGGGCTAGCTCAC  
CATATGCGTAAAATTCTGTAGCCAAAAGGAGCAAGCAAAGCTAGGAGGAGGATTAGTTCTT  
GCGCATCGCTTCTGAGCTCGATCTACGTCGTCCGGCCGGCCGGGAGGGATCGATCGATGG  
GTCTGAGGGAGATCGAGTCGACATTGCCGCCGGGGTTCAGGTTCTACCCGAGCGACGAGG  
AGCTGGTCTGCCACTACCTCTACAAGAAGGTGTCCAACGAGCGCGCCTCGCAGGGGACGC  
TGGTGGAAGTCGACCTCCATGCGCGCGAGCCATGGGAGCTTCCCGGTGAGTCATGAATTA  
ATATATCCTGCATGTTGCTGCTAATTCTCATCGTTCTATATATCTCTCCCCTCGATCTCG  
CACAGGTTGCTTTATCACTAGTAAGTCTTATGTTAGCATGTTTCCGGATTAGATATATAG  
ATCATAGATGTGATGATCTCGATCGAGATGCTTACAGAAAACAGCAAAAACCATGCATCT  
GATTTTCTTCATGATGCGATAGGCTAGCAGATTAATTAGCATGCTCTGTTCCATTGAAGA  
TATATTTGCAAAAAAAAAAAAAAGCTTGCCCTTTAATTTGGTAGCACCGTAGCAGCAAGT  
ACTGATGATGTCACAATTATAATGATGAACAAGAAAATAACTACCTGATCGAAGAATTTT  
CTACTTAGTATATATATTTGAATTATTTAACTTGAATGAATCCTAAAGATTGATTTCT  
GTCAGTTAATGGCCTTGAGCTCCATAATTTATCACGGAATAATCCACAATAATTTTCGTCC  
AATAATACATTAAGTATACGAAAAGCAAAGTGTATACTCGTCGCCATCTTGATGACGAC  
TCCGATACCGTCTGTTTCTTTGCTACGTCACATGAGTAACAGTTCCTTCCGTTTTTCTGT  
TCCTTTTTTCTCTGAAAAACCATTTCCCTTTTTTCCCTCCAGAAATTAGTTCAGTTTGAGCA  
CTTTACGGCCGTCATCTAACTCTCCTCGGTGTATCAGAACGGATTTGCTAGTTTACTG  
GCGACAGTAAACGAGGGGAAAAAAGTCCGAATTTTTGAACGTCGGATTTCGCCTCAAGATT  
AGTGCTGGCGCGTTCGTGCAAAAAGATCCACGCGATATGTAAAGAAAAAAGTCCGAATTTT  
TGAACGTCGGATTTCGCCTCAAGATTAGTGCTGGCGCGTTCGTGCAAAAAGATCCACGCGAT  
ATGTAAAGAAAAAAGTCCGAATTTTTGAACGTCGGATTTCGCCTCAAGATTAGTGCTGGCG  
CGTTCGTGCAAAAAGATCCACGCGATATGTAAATTTGTGTGTTGCATGGGGTTCGAACCCA  
GGACTTCAATCCCACTAGCTATGCGTGGTAGCCACTTCGTCTCATGCAAGTTTTTTAAAA  
AGTTTGCAAGTTACAGTTAGTTATACTCCAGTTACACTCTAGTTACATTGTAGTTACCAT  
TGTAAGTATAGTGTAAGTACACTATAACTATATTGTTATCTCTATATAAATTAGATATAA  
AGTTGCATATATTATTTAATACATATATACAAGTTATTATTATTATAGTATATAATTCT  
AGTAAAATTTCCCTCAAAAAAAGTCCGACAGTTTTTTAGCTAATCCCTATCAGAAATTA  
GTTTCACTTCATGTATGCAAAAGCCAGACTAATTTCGCATGCACTATCTCAACTTCTCAAGC  
CCCTCTCTAACAACGCATTTCGTTCTTGCTATTCTTTGCGCACATGCAGACGTGGCGAAGC  
TGACGGCGAGCGAGTGGTACTTCTTCAGCTTCAGGGACCGAAAGTACGCGACGGGGTCGC  
GCACGAACCGCGCCACCAAGACAGGCTACTGGAAGGCCACCGGCAAGGACCGCGAGGTGC  
GCAGCCCGGCCACGCGCGCCGTCGTCGGCATGCGGAAGACGCTCGTCTTCTACCAGGGCC  
GCGCCCCCAACGGCGTCAAGTCCGGCTGGGTCATGCACGAGTTCCGCCTCGACTCGCCGC  
ATTCTCCACCAAAGGTACGTACATAGCAGAGCTAGCTCTTCTCTCTACCCGCCAAAACG  
TGCTACTTCTTGTGTTGCCGCTAATTGCTAACCTGGACACGGATCGATATGCGTTTCTTGCA  
GGAGGATTGGGTGCTTTGAGGGTGTTCAGAAGAGCAAGGGAGACGGCGAGCAAGACAA  
CCCCACCAGCGCAGCCTCCCCGGCGCGACCTTCGCCGGCTCGTCGAGGCGGCGGTGCC  
TGGCCAAGCCGCTACAGCAGCGACGACCATACGGGCTCGTCGATGGGATTCGCGCCGAG  
GCAGAACGAGATACTCGACAGCTCGAGCCATCAGTTGCTGAACTTGGCGATGCTGCAGTG  
CAACTCGGTTCTCGATCATTTCCCGCAGGAGGTGAACAGCTCGCCGATGATGGGGTTGGC  
AGGGTCCATCGGAATTGGGGATGAATACGGCTTCTTCTACGATACCGGCTTCGAGGAGAC  
GGCGAGCCTCGGGGGCATGAGGTTCCCAAGGGTGGAGTTGATGCCAATTGATCGTGCA  
TGCAGTGAGATCATCGTGCTGCGCGCATTTGCGAAGGAAAATGATTGAATTAATTCCAT



TGATACAGTTATTTTCGTCCTAAAAAATAAACTATTGCTACTGTAGGTAGTGTTTGGTTT  
AGCATAGAACCTGCATGAGATGGTTCGGTCACCTGAACTGTATATATATTGTGTGAGTCA  
AAATGTATCGCTCTACTCGTATGCAAGTTGATACAATCCATCCCAAAGTTCCAGTTCATA  
GATCAAACGATCTATGAGCTATCAAACCTGGATTTGTTGTTACAAATTAATGGCATTTCCA  
CTTGTTAAATAGTTTTTTTTTCCC

CDS

>ONAC008  
ATGGGTCTGAGGGAGATCGAGTCGACATTGCCGCCGGGGTTCAGGTTCTACCCGAGCGAC  
GAGGAGCTGGTCTGCCACTACCTCTACAAGAAGGTGTCCAACGAGCGCGCCTCGCAGGGG  
ACGCTGGTGGAAGTCGACCTCCATGCGCGCGAGCCATGGGAGCTTCCCGACGTGGCGAAG  
CTGACGGCGAGCGAGTGGTACTTCTTCAGCTTCAGGGACCGAAAGTACGCGACGGGGTCG  
CGCACGAACCGCGCCACCAAGACAGGCTACTGGAAGGCCACCGGCAAGGACCGCGAGGTG  
CGCAGCCCCGCCACGCGCGCCGTCGTCGGCATGCGGAAGACGCTCGTCTTCTACCAGGGC  
CGCGCCCCAACGGCGTCAAGTCCGGCTGGGTTCATGCACGAGTTCCGCCTCGACTCGCCG  
CATTCTCCACCAAAGGAGGATTGGGTGCTTTGCAGGGTGTTCAGAAGAGCAAGGGAGAC  
GGCGAGCAAGACAACCCACCAGCGCAGCCTCCCCGGCGGCGACCTTCGCCGGCTCGTCG  
CAGGCGGCGGTGCCTGGCCAAGCCGCGTACAGCAGCGACGACCATACGGGCTCGTCGATG  
GGATTGCGCGCGAGGCAGAACGAGATACTCGACAGCTCGAGCCATCAGTTGCTGAACTTG  
GCGATGCTGCAGTGCAACTCGGTTCTCGATCATTTCGCCGAGGAGGTGAACAGCTCGCCG  
ATGATGGGGTTGGCAGGGTCCATCGGAATTGGGGATGAATACGGCTTCTTCTACGATACC  
GGCTTCGAGGAGACGGCGAGCCTCGGGGCGATGAGGTTCACACAAGGGTGGAGTTGA

Protein

>ONAC008  
MGLREIESTLPPGFRFYPSDEELVCHYLYKKVSNERASQGTLEVDLHAREPWELPDVAK  
LTASEWYFFSFRDRKYATGSRTNRATKTGYWKATGKDREVRSPATRAVVGMKTLVFYQG  
RAPNGVKSGWVMHEFRLDSPHSPPKEDWVLCRVFQKSKGDGEQDNPTSAASPAATFAGSS  
QAAVPGQAAAYSSDDHTGSSMGFAPRQNEILDSSSHQLNLAMLQCNSVLDHFPQEVNSSP  
MMGLAGSIGIGDEYGFFYDTGFEETASLGGMRFPQGWS\*

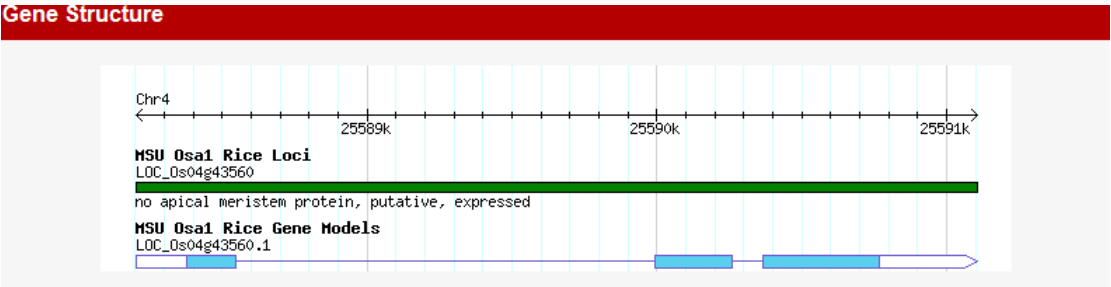

LOC\_Os07g37920 (ONAC010) sequence information

**Genomic sequence length:** 2644 nucleotides

**CDS length:** 1278 nucleotides

**Protein length:** 425 amino acids

Genomic Sequence

>ONAC010

CCCAGCGCAGATCGCTCGCCTGCCTTGCCTGCCCCTCCGCCTAACCGACACCGCAACAAA  
CCACAGCCACACAGCTTCTCTCTGTTGCTCGCTTTACTGTGCGTGCTGTATATACACCCG  
GTGGATGAGGGATCTAGCTAACTAGCTTAGCTAGACAGCGTGTGTTGGTGGTGGTGGTGG  
TGTGTGTGTGTGTGAGGAGGGTGATCGATCGATCGAGCGATGGAGAGCCCGGACTCGTCG  
TCCGGCTCGGCGCCACCGCGAGTACTACGGCGGCAACAGCAGCAGCCGGGCTCGGCGCCG  
GAGCTGCCGCCGGGGTTCCGGTTCCACCCGACGGACGAGGAGCTGGTGGTGCACCTACCTC  
AAGAAGAAGGCCGCTCCGTTCCGCTCCCCGTCACCATCATCGCCGAGGTCGATCTCTAC  
AAGTTCGATCCCTGGGATCTCCCCGGTACGTAATTTAATCACTTACACCCATACCAATCA  
TAAATTAAGAATTTATTATTACAGCTTATATATACTATTATCATGCATGTATATTATCTA  
AAAAAATCAGCCCAAATCTCCATATGCATGTGAGCATGCTAGCTTGGATGTGTAGTGCT  
CGATCGATCGATCGATCGATCGATCTGGTGTCTGTTTACTTGTGTTGTGCGATTTATGCGTG  
CATGCATCGGTTTGTATCAGAGAAGGCGAACTTCGGGGAGCAGGAGTGGTATTTCTTCAG  
CCCGAGGGACCGCAAGTACCCGAACGGGGCGCGGCCGAACCGGGCGGCGACGTCGGGGTA  
CTGGAAGGCCACCGGCACCGACAAGCCCATCATGTCTGTCGGGGAGCACCCGCGAGAAGGT  
CGGCGTGAAGAAGGCGCTCGTGTCTACCGGGGCAAGCCACCCAAGGGCGTCAAGACTAA  
CTGGATCATGCACGAGTACCGTCTCACGGACACGTCTAGCTCCGCCGCCCGCTCGCTAC  
GACCAGGCGGCCGCCGCCGCCATCACGGCGGTAGCAAGGGCGCCGTCTCTCTCAGGGT  
ACGTACGTATATACGTTTGTGCGTGACAGTCTCGCTTGGAGTCTTGGACTGATTGATCTG  
ATCAAGTTGATTAGTGTCTCAGCTGGATGACTGGGTGCTGTGCCGCATATACAAGAAGAC  
GAACAAGGCCGGTGCGGGGCAGAGGAGCATGGAGTGCAGGACTCCGTGGAGGACGCGGT  
GGCCGCGTACGCGCCGTCGTGCGCAGCAGCATGCCACGGCTGCTGCTGGCATGGCCGGTTC  
GGACGGCGCCGAGGAGTTGCTGCGAGCGCACGGCGGCGACTACAGTTCACTGCTCCATCA  
CGACAGCCACGAGGACACCTTCCTCGTAAACGGCCTGCTCACCGCGGAGGACGCCGCCGG  
CCTCTCGACCGGCGCCAGCTCTCTCAGCCAGCTCGCCGCGGCGCGAGGGCGGCGGCGAC  
ACCGTGCGACGCCACCAAGCAGCTTCTTGCTCCGTCTCCAACCCCATTCAACTGGTTCGA  
GGCATTCCCTTCCACGGGCCAAGGAGTTTCCTAGTGGGCTAAGCAGGAGTAGCAGAGACAT  
CGGCGACATGTGCTGTATCGACGGTGGACAGGAGCCTGTCTGAGGCTGGCGCCGTGGC  
CATTGACACCGGCGACGCCGCCAATGGCGCAAACACTATGCCTGCATTTATCAATCCTCT  
CGGCGTGCAGGGTGCAACCTACCAACAACACCAAGCCATCATGGGTGCCTCGTTGCCATC  
GGAGTCAGCAGCAGCAGCAGCCGCCTGCAATTTCCAGCATCCGTTCCAACTCTCCAGGGT  
GAATTGGGATTCCCTGAATAAAAGGTGCCGGCATTATGCATACACATATATGCACATGCAT  
ACATGCATGGCTTTTCAAGTAGTAGCACAACATTACTAGTAATTAATCACACTAATGTGT  
GTGGCAGTCGCATTCACTGAGCACTGATCGAGTAGTTGCATGAACACAACACTAATGCAT  
GCACTACATATATATGGCCGATTGCTCCTAGGGCACGTACCTGTACGAACTAGGTAAGT  
GACCTAACCGCTAGATCATGTTTCAAGATAAGGAGAAGAAGCCGCATGCAAACACGTAGA  
TCATATGGCTTTGCCTTCACATGCGTTTGCATCATATATATCGCATTTCAGAAAGTAGTGC  
TGCAGCTAACACATAGATATGGTGTAGCTTCATGCGTTTGTACCATATATAGCGGATGC  
AGAAAGTAGCTAGTTGCACTGTTTCATCATTATCCCATGAGATATGAACCTTATATACCTT  
TGGGGTTGCCCTTCTAAAAGTCATGCATCTAGAGCCCCCTGGTAATAGCATGCATTGATG  
TTTCATGCGCACATATATATAATTGATATATATCCTTGTATATACGTAGGAGTAATTCGC  
TGATAGAACGGCACTTACATAGTACGCTGTACTGTACATGTAAACAAAACTTACATATT  
ATAAGAAAAAACGATATTATAGACACGCTGCATAGCTAGATTAACCATCTGGGAGAAATA  
AAGCATCTATCCACGATCACTCAAAAACAAATGCATGATGCATGTGCTAGCAACAGTATG  
TATTATATATGGATTGAATCATTGAAGTGCATATATATATACGTAGACGAGTTTTTGTCA

GGCT

CDS

&gt;ONAC010

ATGGAGAGCCCGGACTCGTCGTCCGGCTCGGCGCCACCGCGAGTACTACGGCGGCAACAG  
 CAGCAGCCGGGCTCGGCGCCGAGCTGCCGCCGGGGTTCCGGTTCCACCCGACGGACGAG  
 GAGCTGGTGGTGCACTACCTCAAGAAGAAGGCCGCCTCCGTTCCGCTCCCCGTCACCATC  
 ATCGCCGAGGTGATCTCTACAAGTTCGATCCCTGGGATCTCCCCGAGAAGGCGAACTTC  
 GGGGAGCAGGAGTGGTATTTCTTCAGCCCCGAGGGACCGCAAGTACCCGAACGGGGCGCGG  
 CCGAACCAGGGCGGCGACGTCGGGGTACTGGAAGGCCACCGGCACCGACAAGCCCATCATG  
 TCGTCGGGGAGCACCCGCGAGAAGGTCGGCGTGAAGAAGGCGCTCGTGTTCTACCGGGGC  
 AAGCCACCCAAGGGCGTCAAGACTAACTGGATCATGCACGAGTACCGTCTCACGGACACG  
 TCTAGCTCCGCCGCCGCGTCGCTACGACCAGGCGGCCGCCGCCCATCACCGGCGGT  
 AGCAAGGGCGCCGTCTCTCTCAGGCTGGATGACTGGGTGCTGTGCCGCATATACAAGAAG  
 ACGAACAAGGCCGGTGCGGGGCAGAGGAGCATGGAGTGCAGGACTCCGTGGAGGACGCG  
 GTGGCCGCGTACGCGCCGTCGTCGCAGCAGCATGCCACGGCTGCTGCTGGCATGGCCGGT  
 TCGGACGGCGCCGAGGAGTTGCTGCAGCGCACGGCGGCGACTACAGTTCACTGCTCCAT  
 CACGACAGCCACGAGGACACCTTCCTCGTAAACGGCCTGCTCACCGCGGAGGACGCCGCC  
 GGCCTCTCGACCGGCGCCAGCTCTCTCAGCCAGCTCGCCGCGGCGGCGAGGGCGGCGGCG  
 ACACCGTGCAGACGCCACCAAGCAGCTTCTTGCTCCGTCTCCAACCCATTCAACTGGTTC  
 GAGGCATTCTTCCACGGGCCAAGGAGTTTCTAGTGGGCTAAGCAGGAGTAGCAGAGAC  
 ATCGGCGACATGTCGCTGTCATCGACGGTGGACAGGAGCCTGTCTGAGGCTGGCGCCGTG  
 GCCATTGACACCGGCGACGCCGCCAATGGCGCAAACACTATGCCTGCATTTATCAATCCT  
 CTCGGCGTGCAGGGTGCAACCTACCAACAACACCAAGCCATCATGGGTGCCTCGTTGCCA  
 TCGGAGTCAGCAGCAGCAGCAGCCGCTGCAATTTCCAGCATCCGTTCCAACCTCTCCAGG  
 GTGAATTGGGATTCCTGA

Protein

&gt;ONAC010

MESPDSSSGSAPPRVLRRQQQQPGSAPELPPGFRFHPTDEELVVHYLKKKAASVPLPVTI  
 IEVDLYKFDPWDLPEKANFGEQEWYFFSPRDRKYPNGARPNRAATSGYWKATGTDKPI  
 SSGSTREKVGVKALVFYRGKPPKGVKTNWIMHEYRLTDTSSSAAAVATRRPPPPITGG  
 SKGAVSLRLDDWVLCRIYKKNKAGAGQSRMECEDSVEDAVAAYAPSSQQHATAAAGMAG  
 SDGAGGVAAAHHGGDYSSLLHHDSHEDTFLVNGLLTAEDAAGLSTGASSLSQLAAAAARAA  
 TPCDATKQLLAPSPTPFNWFEAFLPRAKEFPSGLSRSSRDIGMSLSSTVDRSLSEAGAV  
 AIDTGDAANGANTMPAFINPLGVQGATYQQHQAIMGASLPSESAAAAAACNFQHPFQLSR  
 VNWDS\*

#### Gene Structure

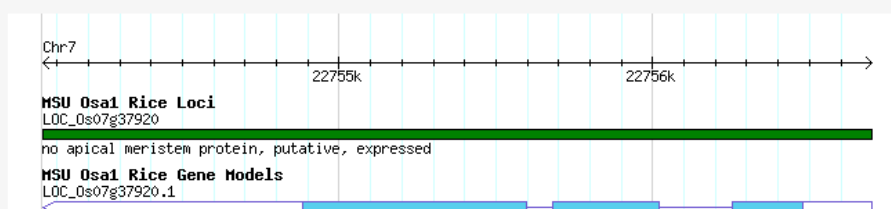

**LOC\_Os06g46270 (ONAC011) sequence information****Genomic sequence length:** 4341 nucleotides**CDS length:** 915 nucleotides**Protein length:** 304 amino acids

Genomic Sequence

&gt;ONAC011

```
CTGGCACGCGAACCAAGAAAAAGTCTCTCTCTCCTCTCCTCTCTTCTTCATCAACACACAC
TGGTTGACCAACCAGCTAGCTGATCGAGTTCGTTGTTTACCATCCTATTAATACCCCTTC
CTCTCTCTCTTCTCCCCCTCCTGAATTTCTCTCTTGGTAGAGGTAGAATTGATCTCCTTTC
TTGTTCTTCTTCGAGTTCCTTAATTGGAGTTCCTGGAGCAGCATCGGTAGTCGTCGTC
TTCGTCGATCCAGCATCTCAAGGAATTCGAGGAGGAGGGGGTGGGCATGAGCGGGATGAA
TTCGCTGAGCATGGTGGAGGCGAGGCTGCCGCCGGGTTTCAGGTTCCACCCGCGAGACGA
CGAGCTCGTGCTGGACTACCTGAAAAGGAAGCTCCTCGACGGCGGCGTGGGCGGCGCCGC
GGCGGCGGCGGCGGCGGTACCATCTACGGCTGCCCGGTGATGGTCGACGTCGATCTCAA
CAAGTGCAGCCATGGGACCTTCCTGGTAAGACCTAGCTATAAGCTAGCTACAGATCATA
GATCATCGAGCTTGCTTGCTTGCAATCCATGCTACTCATGTCGTGGTGATCTTGCTCTTCT
TTCTCGTCTTCCACCGCTCTGGATCATCATATGCGTGCTTGTTTCATGGCCATGATTGGT
TTGAGTTTTTTTTCTCCAGATTCTTTCTCTCTACTGATTGATCTGCTCTGAAATGAATTA
ATTCGTGTGCTTTTTTTTTGAGGGGGGAAAAATTAACCGCGTGCTGTTTTTCGTGTAGTTTT
TGTTTAATTTCTCTATAGATCGGTAGCTAGGCTTCTCAAATTAACAACCTTTTGATTTGT
TCTACCTCTAAAAACAAATCACCCATGATTCTATATTTATATGATAGAATCAATAATGG
TATGATGATCTGTTAAACAGACAAGTCTTTCCATGTACTAGCTAGCTAGGACCCAGCAG
CCTGCAGAATTCTGTCAGTTTTAGAATAAGATCAACTGATCATTCCACAATTATTAGCTG
TTTGTGCACACACGCATCTAAGGTTGCCAATCATGTGTTTATCTAGCTAGCTAACTTGCA
GTTGGTTCTGCAGAAATCAGTACTTGAATTCAAGATCTTGGTAACAACCTCATCTTTTCTC
TCTTTTTCTTGATGTACAAAAAGAACAAGATCTTGAACCAACCATAACTTCTATCTATT
CCAAGAAAATTCTCTTTGTTCCCTTTTCTACATGCCTCCAATGTTTTTCCTTCAATGGGCA
CAGATATATACTAGTATAGTAGTACCTTCTTGATCCAATCAATTGCATCCAAATTG
AAGGTGATGCCTGTCCATGTATGCATGTCAGTTGATCCTTTTCTACAGCAAAGGTAGCCA
TAACTGAAGTGATCATGACCTCTTCTGCAACTCTCATATATAGATCAAGTTGCATATTC
AACTATGCATACATGCTAGCTTCCCATACCTCAAGAATCATGCCTTCTCTTTTCTTTAG
TTCCTCCCCCTTTTTTGCCCCCTTTTTTGGGGTGTGCCCATGCCCTTAATTTGTTTTTA
GTTATTGGAATTATTTTTTTTTGCCACAACATTTAATGTTTCTCTGTTTGTGTACATA
TAGCTGCAAGCTAACCGTTTGAAAAGTCTTGAGCCAACGCAAGAAATATCAGATAGTGAG
ATCATATGCCCAAATTAATAATGCATAAAATTTGTGGGGTGGCTAATGATTTGTTTGTTAC
AAACAAAACAGTCCGGCATTTTTTTAAATTCGTGTTTCAAGTGGAGGCTAGCTAGCTAGCTT
GATCAGATGATTTTCTGAAATCTACAAACGAGAACAAAATTCACACGTCTTGTCTGCCT
CCATCTTGTCGCCTTCTCCTCCCCATAACAGAAGGATATTCTCACTGCTATGAGTTTGTT
TGGCCTCTTCTTGGCCTTCTCCTCCTTATCTGTCCCTGTTGCTGCCATGCAATCAAATAT
TCTCCCACTTTGCCTGATCCTTAAAGGGAATTAACAGCCAGTGGATGGGGACAACTTAA
CACCAAAAAGAGGCCCTCTCACTTTGCCTATTAGTAGAATATAGCCAGGAAATCATGTAAA
AAGGTTATAAATTAAGAAAAATGTGTGCTGAATGGGATAAATACGATAATTAATTGATT
CTATATAGACCTTTCGAAAAAATAGCAAATATGATGCTGTTCCCTAGCTAGCTCATTGTAC
TTTTCTCTCATACCCCCCTAACCTCTCTTCTCGTCTCTTCTCAACACGTACATGCA
```

TCAATTGTTAATGCAAATTTTCTCTATATTAATTGTGTTGATTTCTCTTGACGTACTTT  
 CTAGTTGTCTTTCTTACTTAGAGTGGCTATGCTAATAATTAGCCAAGTTTGTGTTTCCATG  
 TTTATGAGTAAATTGATCATTAGGCTAATTAATGGCTTTACATTTTTCTGAAATTATATG  
 TTAGTCTTTTGTGATTGTTTATTTTTTCTTGCAATCAGAGATCGCTTGCCTTGGTGGCA  
 AGGAGTGGTACTTCTATAGCCTTAGGGATAGGAAGTATGCAACTGGCCAACGAACAAATA  
 GAGCAACCGAATCGGGCTACTGGAAGGCCACAGGAAAAGATCGCCCAATAAGCCGGAAAG  
 GATTGCTCGTCGGTATGCGAAAAACCCTGGTGTCTACAAAGGTAGAGCCCCTAAGGGGA  
 AGAAGACCGAGTGGGTCATGCATGAATTCCGCAAAGAAGGACAAGGGGATCCGATGAAGT  
 TGCCTCTCAAGGTACGTATTATATTTTTAATACATTCTTAATTTATAAATATAAATATTA  
 TTCCTTTGTTGGATTCTCCATGTAAAATATCCATTTACTAGATGCCAATCCTTTATTTAT  
 GCACTTATTTGTGATTCTTGATATATATTATATATGTATATGATGTCTAAAATATAATAG  
 ACTTTGTACAAGCCAATCCTTTATTTATGCACTTATTTGTTGATTCTTGATATATTATA  
 TATGTATATGATGTCTAAAATATAATAGACTTTGTACAAGCGAGAAGTATCGGGTTTGGT  
 AGTCAGTATGAAATAAAGAATTATTAATTAATAAATTAACCTCATATGATATTTATTACA  
 CAAGAAGGAGACCGACTGGAATGCCAAGTTGTTCTTCATTTGAATAACACATATGCAATG  
 GATAATGGAATGACAACTATCTGTGTACATGTCTCTCCTGATCTCATAACTTCATGATT  
 GAAAAGTGAGAAATACCAAATTTAAGCACACTTTCATGATAATTTAGGTGTCATATGAGG  
 AGGTGAATATGCTAAGTATCTCATTTTTTATGATTAGAACATCATCGATACTTAATATAT  
 TGACATGATGTTATTAGTTAATGCTAACGAGGTTCAATTTTAATTTGGAAGTTATTCTTT  
 ACTTCCATGTCACTCTCATGCCAGCTCTAAATGAGTTATGTTCTCTTCTAGATACACCTC  
 AATAGATGCATGTGCAACTATTGACTCAGTTCTATAAAGCATTTCATGTCTCTTTCCAATA  
 ATTTCTTAATGTGTGAGATGCTCTCTCCAAACAATTAATAGAAGAGAATTAACAACT  
 ACTTATTTATCATAAATGTAATCTTCATCCAATGTTTTTATGTGAACAGGAGGACTGGGT  
 CTTGTGTAGAGTCTTCTACAAGAGTAGGACAACCATTGCCAAGCTGCCAACGGAGGGTAG  
 CTACAACAATATTGACAGTGTGGCCACAACCTCACTGCCTCCCCCTCACTGACAACCTACAT  
 TGCATTTGATCAGCCTGGTTCAATGCAAAACCTAGAGGGTTATGAGCAAGTGCCCTGCTT  
 CTCCAATAATCCCTCTCAACAGCCATCGTCGTCGATGAATGTTCCGTTGACATCGGCCAT  
 GGTGATCAAGAGCAAAACAATATGGGTAGGGCGATCAAGGATGTGCTGAGCCAATTCAC  
 CAAGTTTGAAGGCAATGTGAAGAGGGAGGCCCTTCAAAGTAATTTTCCCAGGATGGATT  
 TGATTACTTGGCTGAGAGTGGCTTCACACAAATGTGGAACCTCACTCAGTTGATTTAATTT  
 CGAAGGAGATATATATTGATTGTTGCGAATTGAGGAGGAACTCTTAAAGTGTGCTTATG  
 TGCTATTGCATGTAATTGTGATATAGACGTATAGTACCATTCTAGTTCACATTATTTGCA  
 AAAAAAAGGGGTGATCAAAAGAGATATTATCATCATCAATGATGTAAATACATTATTTG  
 TGTAAGGGTGTGATAAAAAAATAGTGCATGATGCTAAAATTAATGGTATATATCAA  
 TAGAGCTAGAATCTTCTTTTA

# CDS

>ONAC011

ATGAGCGGGATGAATTCGCTGAGCATGGTGGAGGCGAGGCTGCCGCCGGGGTTCAGGTTC  
 CACCCGCGAGACGACGAGCTCGTGCTGGACTACCTGGAAAGGAAGCTCCTCGACGGCGGC  
 GTGGGCGGCGCCGCGGCGGCGGCGGCGGTCACCATCTACGGCTGCCCGGTGATGGTC  
 GACGTCGATCTCAACAAGTGCAGCCATGGGACCTTCCTGAGATCGCTTGCGTTGGTGGC  
 AAGGAGTGGTACTTCTATAGCCTTAGGGATAGGAAGTATGCAACTGGCCAACGAACAAAT  
 AGAGCAACCGAATCGGGCTACTGGAAGGCCACAGGAAAAGATCGCCCAATAAGCCGAAA  
 GGATTGCTCGTCGGTATGCGAAAAACCCTGGTGTCTACAAAGGTAGAGCCCCTAAGGGG

AAGAAGACCGAGTGGGTCATGCATGAATTCCGCAAAGAAGGACAAGGGGATCCGATGAAG  
 TTGCCTCTCAAGGAGGACTGGGTCCTGTGTAGAGTCTTCTACAAGAGTAGGACAACCATT  
 GCCAAGCTGCCAACGGAGGGTAGCTACAACAATATTGACAGTGTGGCCACAACCTCACTG  
 CCTCCCCTCACTGACAACTACATTGCATTTGATCAGCCTGGTTCAATGCAAAACCTAGAG  
 GGTATGAGCAAGTGCCCTGCTTCTCCAATAATCCCTCTCAACAGCCATCGTCGTCGATG  
 AATGTTCCGTTGACATCGGCCATGGTTGATCAAGAGCAAAACAATATGGGTAGGGCGATC  
 AAGGATGTGCTGAGCCAATTCACCAAGTTTGAAGGCAATGTGAAGAGGGAGGCCCTTCAA  
 AGTAATTTTCCCAGGATGGATTTGATTACTTGGCTGAGAGTGGCTTCACACAAATGTGG  
 AACTCACTCAGTTGA

#### Protein

>ONAC011

MSGMNSLSMVEARLPPGFRFHPRDDELVDYLERKLLDGGVGGAAAAAAVTIYGCPVMV  
 DVDLNKCEPWLPEIACVGGKEWYFYSLRDRKYATGQRTNRATESGYWKATGKDRPISRK  
 GLLVGMRKTLVFIYKGRAPKGGKTEWVMHEFRKEGQGDPMKLPLKEDWVLCRVFYKSRTTI  
 AKLPTEGSYNNIDSVATTSLPPLTDNYIAFDQPGSMQNLEGYEQVPCFSNNPSQQPSSSM  
 NVPLTSAMVDQEQQNMGRAIKDVLSQLTKFEGNVKREALQSNFSQDGFIDYLAESGFTQMW  
 NSLS\*

#### Gene Structure

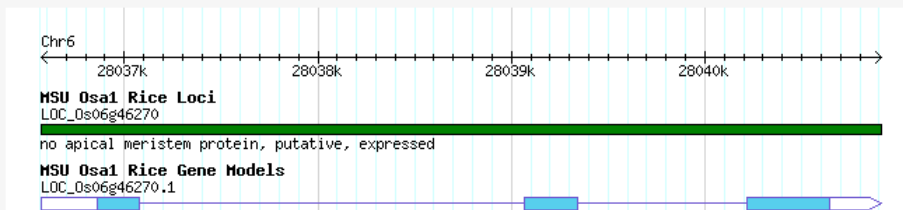

#### LOC\_Os05g37080 (ONAC012) sequence information

**Genomic sequence length:** 1637 nucleotides

**CDS length:** 825 nucleotides

**Protein length:** 274 amino acids

#### Genomic Sequence

>ONAC012

ATATACGAGCCTTTGCTACCCACCACGAGAGAGACGCCACCGTACATCGATCCATCGCC  
 GGCCGGCCGCACACGGGTGGATTGAGATCGATCGATCGATCGGGCAGCGGCGGACATGG  
 GAGAGCTGCCTCCGGGTACCGGTTCTACCCCACTGAGGAGGAGCTGGTGTGCTTCTACC  
 TCCGGCACAAGCTCGACGGCGGCCGACGCGTCCCCGACATCGAGCGCGTCATCCCCGTCG  
 CCGACGTCTGCTCCCTCGATCCATGGCAGCTCCCAGGCACGTTGATCGTCGTCGTCGTCG  
 TCCTTGCACTAATTGTATTTACACCTTGCATGCGTGCAATGCGTGTTCGCGCCGCC  
 GCTAGCTAACGGGGTCTGTTCTTGATTACGTTGTGCAGAGGCGCACCAGGGCGCGTGGAC  
 CGGCGACGGCGAGCCGTGGTTCTACTTCTGCCCCGGCAGGAGCGGGAGGCGGGGGCGG  
 GCGGCCGAGCCGCACGACCGGTCGGGGTACTGGAAGGCCGCGGCACGCCGGGTGGGT  
 CTACTCCTCCGACGGCCGCCCATCGGCACCAAGAAGACCATGGTGTCTACCGCGGCCG

CGCGCCGGCGGGGGCCAAGACCAAGTGGAAGATGAACGAGTACAGGGCCTTCGAGGAAGA  
 CGACGACAACGCAGCCGCCGCTGCTCCGGCACAGAACCATTATCTCCAGGTAAATTGAAC  
 TTAGAGATGCCTCTTTTTTTTTATCCTATCCTATTTTTTTTTTAGATATGGAATTAAGTCCT  
 ATATAACAAACCTAACATCATGGTCAAGTTGCAACTTCAATCATTTCTCATTCCAAAACA  
 AAACATACTCCTTTATGCTCTAGTTGCAATGGTGATCGTGATGAGAGGCGGCTAGCTACT  
 GTAGACGCACGAGCCGTGAGGGAACTACAACCTGGAATATAAAACGTTAATTTGTGCTT  
 GTTAATTTTCGCAGACGAGGAGTGAAGTTCAGCTTGTGCCGGCTGTACACCAGGTCAGGGTG  
 CCCCCGGCAGTTCGATCGCCGGCCCGGAGCTCCTCGGTGGCAGGCGGCGGCGGCGAGAA  
 CCGGGCGGCGCCGTCATCCACCGCGGCTGCGTTTGCCAACGAGGATGCTGCTGAATCCTC  
 CGGGAAGAGTCAGAAGAGGAAAAAGGAGCGCGCCAGATGACAGCCTTGACAGCACCTCATC  
 CAGCGACGACAATGGCGGCTGCGATGGTCTATGCTGCAGCAACAGCAGCAGAGGCAGAG  
 AGGAACCGATGAGGAGCTTGTAGAGTGCAGCATGACGGACTGGGCAGATCTTTTGACTG  
 GTTTTGATGTAGGAATTCGATTTTACGGTCGGTCGTAAATTCAAGAAAACGGCGGTGAT  
 CTCTAATTTTTGTTGCTAATTTTCATTATTTTTTTCGTGTTGCCAAAAAATATTTTAGCA  
 GTCAATGGTAAATTTTGAGAAAAGATCTCAGACAGTTGGCAGCTCAAAGACACAATTTTT  
 TAATGATAACGAAAATAATAAAAGCCTGCTGAAAATCAAATTGTAGCGTTTGTGAATT  
 AATTGTTGATGCAATTTTGTACAAGAGCAATTGAATCATTGCCAGGAACAATAAAATCCA  
 ACAAATATACTTATCA

#### CDS

>ONAC012

ATGGGAGAGCTGCCTCCGGGGTACCGGTTCTACCCCACTGAGGAGGAGCTGGTGTGCTTC  
 TACCTCCGGCACAAGCTCGACGGCGCCGACGCTCCCCGACATCGAGCGCGTCATCCCC  
 GTCGCCGACGTCTGCTCCCTCGATCCATGGCAGCTCCCAGAGGCGCACCAGGGCGCGTGG  
 ACCGGCGACGGCGAGCCGTGGTTCTACTTCTGCCCGCGGCAGGAGCGGGAGGCGCGGGGC  
 GGGCGGCCGAGCCGCACGACGCCGTGCGGGTACTGGAAGGCCGCGGGCACGCCGGGTGG  
 GTCTACTCCTCCGACGGCCGCCCATCGGCACCAAGAAGACCATGGTGTCTACCGCGGC  
 CGCGCGCCGGCGGGGGCCAAGACCAAGTGGAAGATGAACGAGTACAGGGCCTTCGAGGAA  
 GACGACGACAACGCAGCCGCCGCTGCTCCGGCACAGAACCATTATCTCCAGACGAGGAGT  
 GACTTCAGCTTGTGCCGGCTGTACACCAGGTCAGGGTGCCCCCGGCAGTTCGATCGCCGG  
 CCGCCGAGCTCCTCGGTGGCAGGCGGCGGCGGCGAGAACCAGGCGGCGCCGTCATCCACC  
 GCGGCTGCGTTTGCCAACGAGGATGCTGCTGAATCCTCCGGAAGAGTCAGAAGAGGAAA  
 AGGAGCGCGCCAGATGACAGCCTTGACAGCACCTCATCCAGCGACGACAATGGCGGCTGC  
 GATGGCTCTATGCTGCAGCAACAGCAGCAGAGGCAGAGAGGAACCGATGAGGAGCTTGTA  
 GAGTGCAGCATGACGGACTGGGCAGATCTTTTGGACTGGTTTTGA

#### Protein

>ONAC012

MGELPPGYRFYPTEELVCFYLRHKLDGRRVPDIERVIPVADVCSLDPWQLPEAHQGAW  
 TGDGEPWFYFCPRQEREARGGRPSRTTPSGYWKAAGTPGWVYSSDRPIGTKKTMVFYRG  
 RAPAGAKTKWKMNEYRAFEEDDDNAAAAAPAQNHYLQTRSDFSLCRLYTRSGCPRQFDRR  
 PPSSSVAGGGGENRAAPSSSTAAAFANEDAAESSGKSQKRKRSAPDDSLDSTSSDDNGGC  
 DGSMLQQQQQRGRGTDEELVECSMTDWADLLDWF\*

## Gene Structure

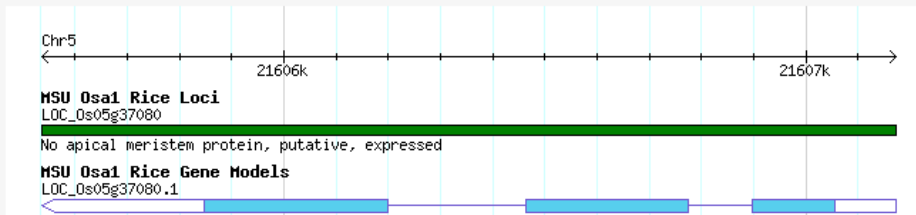

## LOC\_Os02g15340 (ONAC013) sequence information

**Genomic sequence length:** 1999 nucleotides

**CDS length:** 1080 nucleotides

**Protein length:** 359 amino acids

Genomic Sequence

>ONAC013

```
ATCTCAAATCAGATCATCTCAAGTTCCTCAACCTAGCTATCTCTGCTGGTCTCCCCAA
GCTCTCCTTTATATAACACAACTACATCATCTCCTTTCTCTTGTGTGCAACATCACAAA
CACAACCTTTCACTCCCATCTTGGCTTTCTTTCCTGTCTCTAGCTTAGCTACCTGTTGCT
TCCAAGCTGAGAAAAACCAAGCAAGAAGCTGTTTGTGTGCCTTTCCAAGGTATAGATT
TGCATGCATATACACTTTATCCTGTCCAGTTAGAACTTATATAAGGACTTGTAAGTTTC
TTTACTGAATTAAGGTTAAGTAACTTGCTAAATGCATGAGTTTCTGATGCATTGTGAA
TTTGTGGGTATTTCTCAGAGTGAAAAAATGCATCCTAATGGCGCGCCGCTGGCCGT
GCCACCGGGTTTCCGGTTCATCCGACGGACGAGGAATTGCTCTACTACTACCTGAGGAA
GAAGGTTGCTTATGAGGCCATAGATCTCGACGTCATCAGGGAGATTGACCTCAACAAGCT
TGAGCCTTGGGATCTCAAAGGTATAAACACATATGCTTGCTAATTAATTAAGTCACTT
CTTTAGAAAAATGAACAACTTACAAATGTATATGTTGTGTTGGTGCTTAATTTTTTTCAC
AAAAACACCTAACGATTTTAAATTTAACTTTATGAATATATTGATTAACATATATATGGT
TGCATTGATGCAGATCGATGCAGGATTGGGACGGGGCGCAGGAGGAGTGGTACTTCTTC
AGCCACAAGGACAAGAAGTACCCGACGGGGACGAGGACCAACCGCGCCACGGTGGCCGGC
TTCTGGAAGGCCACCGCCGTGACAAGGCCATCTTCCTCGGCAGCGCGCGGCACGAGG
ATTGGCCTGAGGAAGACGCTGGTGTCTACACCGGAAGGGCCCCGCACGCAAGAAGACC
GACTGGATCATGCACGAGTACCGCTCGACGACGACAATGTCGACGTCCCGGTAAGCACC
ATCACCATTCTAATCGATTTCAAGCTAGATAGTTTAGATCAAGTAGAGTTGAGCTCTGAT
TAATGGCGGTTTCTTGGAATGTTGCATTGGATGCGTGCAGGAGGAAGGATGGGTGGTGTG
TAGGGTATTCAAGAAGAAGAGCATCCATCAGAGGGGCTTCGACCAGCCGGACATGGCGGC
GGCGGCCGACGAGGACGAGCTCCGGTACCAGCTGCTCCACGCGCGGGCATGTCGTCGTC
GCCGGTCGACCAGAAGCACGTGCTCCTCCAAGAGCAGCTCGTCGCGCACGGCGCCCATGG
CGGCGGCTTCGTCGTCCTCGGCTTCGAAGCCTCCATGCACCTCCCGCAGCTCGCCAGCGC
CGACGCGGCGCCGTGCGGCGGCGGCGGCGGCGGCCATGTCGCGTTCGCCTCCATGAACCC
GCTCGACGCCCGCGGTGCGGCTCGCAGAACATGATGACGATGAAGATGGCAGCGACATC
CGGTGGCGAGATGCTGCTGATGAGCGGCGGCGGCGTGCACGCGGCGCGCTTCGCGCGCGC
CGCCGACTGGTCGATCCTTGACAAGCTCCTGGCGTCGCACCAGAACCTCGACCAGCTCTT
CCATGGCAAGGTCGCCGAGCGCATCAGCAGCAGCAGCAGATGGCCATGGACGCCGCTC
GTCGTTGCAGAGGTTGCCGTTCCACCATTACCTCGGGTTGGAAGCTGCAGATCTTCTCAA
GTTTTCTATGTAGAAATTTTTTAGCTATATGTAATGTAGTATCTGCTTCTTGATTAATTA
```



AGCAGGCGAATTCTTGT TTTTTTTTCTCTTAGTTTTGTCAAATTATTAGTACTAGTTT  
 CAGTTTGATAAGGTTAATATCGGAGTTCTGCTAGCTACTGGCCTACTGTTCTATAAGCAT  
 GTGTATACAGACAGTCTGAATGCCGTATGAACTTCTTTCTAAATGTTTCAATTCAAGTTT  
 GTTCATCTCGAATTACTAA

#### CDS

>ONAC013

ATGCATCCTAATGGCGCGCCGCTGGCCGTGCCACCGGGTTTCCGGTTCCATCCGACGGAC  
 GAGGAATTGCTCTACTACTACCTGAGGAAGAAGTTGCTTATGAGGCCATAGATCTCGAC  
 GTCATCAGGGAGATTGACCTCAACAAGCTTGAGCCTTGGGATCTCAAAGATCGATGCAGG  
 ATTGGGACGGGGGCGCAGGAGGAGTGGTACTTCTTCAGCCACAAGGACAAGAAGTACCCG  
 ACGGGGACGAGGACCAACCGCGCCACGGTGGCCGGCTTCTGGAAGGCCACCGGCCGTGAC  
 AAGGCCATCTTCCTCGGCAGCGGCGGCGGCACGAGGATTGGCCTGAGGAAGACGCTGGTG  
 TTCTACACCGGAAGGGCCCCGCACGGCAAGAAGACCGACTGGATCATGCACGAGTACCGC  
 CTCGACGACGACAATGTCGACGTCCCCGAGGAAGGATGGGTGGTGTGTAGGGTATTCAAG  
 AAGAAGAGCATCCATCAGAGGGGCTTCGACCAGCCGACATGGCGGCGGCGGCCGACGAG  
 GACGAGCTCCGGTACCAGCTGCTCCACGGCGCGGGCATGTCGTCGTCGCCGGTCGACCAG  
 AAGCACGTGCTCCTCCAAGAGCAGCTCGTCGCGCACGGCGCCCATGGCGGCGGCTTCGTC  
 GTCCCGCGCTTCGAAGCCTCCATGCACCTCCCGCAGCTCGCCAGCGCCGACGCGGCGCCG  
 TCGGCGGCGGCGGCGGCGGCCATGTCGCGTTTCGCCTCCATGAACCCGCTCGACGCCGCC  
 GGCTGCGGCTCGCAGAACATGATGACGATGAAGATGGCAGCGACATCCGGTGGCGAGATG  
 CTGCTGATGAGCGGCGGCGGCGTTCGACGGCGGCGGCTTCGGCGCCGCCGCGGACTGGTCG  
 ATCCTTGACAAGCTCCTGGCGTCGCACCAGAACCTCGACCAGCTCTTCCATGGCAAGGTC  
 GCCGGAGCGCATCAGCAGCAGCAGCAGATGGCCATGGACGCCGCTCGTCGTTGCAGAGG  
 TTGCCGTTCCACCATTACCTCGGGTTGGAAGCTGCAGATCTTCTCAAGTTTTCTATGTAG

#### Protein

>ONAC013

MHPNGAPLAVPPGFRFHPTDEELLYYYLRKKVAYEAIIDLVIREDLNKLEPWDLKDRCR  
 IGTGAQEEWYFFSHKDKKYPTGTRTNRATVAGFWKATGRDKAIFLGSGGGTRIGLRKTLV  
 FYTGRAPHGKKTDWIMHEYRLDDNDVDVPEEGWVVCRVFKKSIHQRGFDQPDMAAADE  
 DELRYQLLHGAGMSSSPVDQKHVLLQEQLVAHGAHGGGFVVPAFEASMHLPQLASADAAP  
 CGGGGGGHVAFASMNPLDAAGCGSQNMMTMKMAATSGGEMLLMSGGGVDGGRFGAAADWS  
 ILDKLLASHQNLDDLFGKVGAGAHQQQQQMAMDAASSLQRLPFHHYLGLEADLLKFSM\*

#### Gene Structure

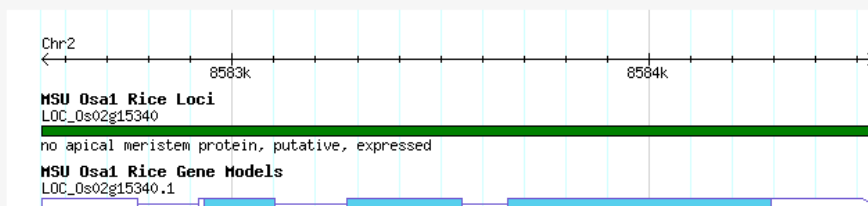

#### LOC\_Os01g01430 (ONAC016) sequence information

**Genomic sequence length:** 1539 nucleotides

**CDS length:** 1023 nucleotides

**Protein length:** 340 amino acids

Genomic Sequence

>ONAC016

TTTCTATCCTTTTCTTCTTCCATCGATTGCATTCAAATATTGATCAATCACGAGATT  
AATTGATTGATATCCATATATATATGATGACCATCGACCTGCAGCTTCCGGCGGCGGCGT  
GCGGTGATCATCACACAGCAGCAGGGGAGGGCTGCCGCCGGGATTCCGGTTCCACCCGA  
CGGACGAGGAGCTCCTCCTCCACTACCTCGGCAAGCGCGCCGCGGCGGCCCTGCCCGG  
CACCGGTGATCGCCGAGGTGGACATTTACAAGTACAACCCGTGGGAGCTGCCGGCCATGG  
CGGTGTTTCGGGGAGTCGGATGGCGAGTGGTACTTCTTCAGCCCACGCGACCGCAAGTACC  
CCAACGGCGTCCGTCCCAACCGCGCCCGGGCTCCGGCTACTGGAAGGCCACCGGAACCG  
ACAAGCCCATCTCCATCTCGGAGACGCAGCAGACGGTACTGCTGGGCGTGAAGAAGGCCC  
TCGTCTTCTACCGCGGTGCCCCGCCAAGGGCACCAAGACCAGCTGGATCATGCACGAGT  
ACCGCCTCGCCAACGCCGCCGCTCCTCCTCCTCCTATACTAGTAACATGAAGCAGC  
TGGCCTCATCATCATCGTCCAGCTCCAGCAGCGCCAGCATGAGGGTACGTACGTGCTACG  
GTGCTAGTGCTAACTACATATATATATATCCTCTTCCATATACTCCATCCACTGATCGAT  
ATATATATATGCGCAATTATATTCATGCGCGTACGCAGCTGGACGAGTGGGTGCTGTGCA  
GAATCTACAAGAAGAAGGAGGCCAACAGCAGCTGCAGCACTACATCGACATGATGATGG  
ACGACGACAACGATGACGAACACAACCTGCAGGTGCAGCAGCAGCAGCAGCAGCAGGCTC  
AAAGCCACCGGATGCCAAGGCCTCCATCCATCTCAGACTACCTTCTCGACTACTCCGACG  
ACCTCCCGCCGTCCACCGATCAGACGCCATCTCTGCACCTTGGATTACGGCGGTGAACG  
AGGGCAACAACAAGAGGCACAAAACCTATGGAGGAATATTATTCTATTTCCATTTCCACTG  
CAGATATGCTGCATGCGTCGTCGTCCACGTCCAACAACAAGTCGACGAAATCAACTTCT  
CCTCCATATTTGAGCCGAGACGCCTGCAGCTGCGGGCCATCAGCTGATGTCTTCTCACA  
ACGACGACACATCCATATGACCAACCTCCCCATCAACTATCTAAAGCTAGGTTAGCAGA  
TTCAATTTCGTTTCAGTCATCATTTCACTACCTACGTTTCGTTACGTCCAAGCTTGTTCAAA  
TTATTGGAGGGGTTGGATTTAATTGAATTGAATTCTTGTTTCATCACAACTGATAGATAA  
TTAATTAATAGATTAATTGTCAGGAATGTACATACATACATACATGTGTACTGGAGTACA  
TAGCTAGCAATTAGTGTCAATTATATACGTTGTTGTAAGTCGTTGTAAGTAACAGTTAAT  
CATGTGCCAAATATATAGCAGTGTTTTACAACAAATTAA

CDS

>ONAC016

ATGATGACCATCGACCTGCAGCTTCCGGCGGCGGCGTGCGGTGATCATCACACAGCAGCA  
GGGGCAGGGCTGCCGCCGGGATTCCGGTTCCACCCGACGGACGAGGAGCTCCTCCTCCAC  
TACCTCGGCAAGCGCGCCGCGGCGGCCCTGCCCGGCACCGGTGATCGCCGAGGTGGAC  
ATTTACAAGTACAACCCGTGGGAGCTGCCGGCCATGGCGGTGTTTCGGGGAGTCGGATGGC  
GAGTGGTACTTCTTCAGCCCACGCGACCGCAAGTACCCCAACGGCGTCCGTCCCAACCGC  
GCCGCCGGCTCCGGCTACTGGAAGGCCACCGGAACCGACAAGCCCATCTCCATCTCGGAG  
ACGCAGCAGACGGTACTGCTGGGCGTGAAGAAGGCCCTCGTCTTCTACCGCGGTGCCCCG  
CCCAAGGGCACCAAGACCAGCTGGATCATGCACGAGTACCGCCTCGCCAACGCCGCCGCC  
TCCTCCTCCTCCTCCTATACTAGTAACATGAAGCAGCTGGCCTCATCATCATCGTCCAGC  
TCCAGCAGCGCCAGCATGAGGCTGGACGAGTGGGTGCTGTGCAGAATCTACAAGAAGAAG

GAGGCCAACCCAGCAGCTGCAGCACTACATCGACATGATGATGGACGACGACAACGATGAC  
 GAACACAACCTGCAGGTGCAGCAGCAGCAGCAGCAGGCTCAAAGCCACCGGATGCCA  
 AGGCCTCCATCCATCTCAGACTACCTTCTCGACTACTCCGACGACCTCCCGCCGTCCACC  
 GATCAGACGCCATCTCTGCACCTTGGATTACGGCGGTGAACGAGGGCAACAACAAGAGG  
 CACAAAATATGGAGGAATATTATTCTATTTCATTTCCTACTGCAGATATGCTGCATGCG  
 TCGTCGTCCACGTCCAACAACAAGTCGACGCAAATCAACTTCTCCTCCATATTTGAGCCG  
 CAGACGCCTGCAGCTGCGGGCCATCAGCTGATGTCTTCTCACAACGACGACACATCCATA  
 TGA

#### Protein

>ONAC016

MMTIDLQLPAAACGDHHTAAGAGLPPGFRFHPTDEELLLHYLGKRAAAAPCPAPVIAEVD  
 IYKYNPWELPAMAVFGESDGEWYFFSPRDRKYPNGVRPNRAAGSGYWKATGTDKPI SISE  
 TQQTVLLGVKKALVFYRGRPPKGTKTSWIMHEYRLANAAASSSSSYTSNMQLASSSSSS  
 SSSASMRLDEWVLCRIYKKKEANQQLQHYIDMMDDNDDEHNLQVQQQQQQQAQSHRMP  
 RPPSISDYLLDYDDLPPSTDQTPSLHLGFTAVNEGNNKRHKTMEEYYSISISTADMLHA  
 SSSTSNNKSTQINFSSIFEPQTPAAAGHQLMSSHNDTSI\*

#### Gene Structure

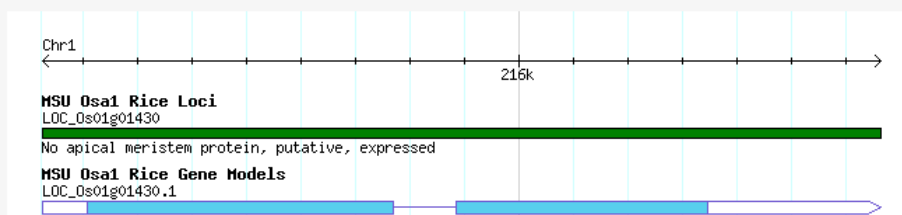

#### LOC\_Os11g05614 (ONAC017) sequence information

**Genomic sequence length:** 2578 nucleotides

**CDS length:** 885 nucleotides

**Protein length:** 294 amino acids

#### Genomic Sequence

>ONAC017

AACCATGGATACAAGCTAGCTTTGCTTCTTCTTCTTCTTCTTGTACCAAATCATTCA  
 AAGTTTTCTTTCTTCAAGCCTTCAATCTTCTATATATATCTCCCTCCATGATCAACCAGC  
 TATAGCTACCTCACTCCAACAATCGCCGACCACGATGGCCACCACGAGGAGCGGCGTCGG  
 CGGCGCCATCAGCGACCCATTTGCGACGCCGGGTTCCGCTTCTACCCGACGAGGAGGA  
 GCTTCTCGGCTTCTACCTCCGCCACCGCCTCGCCGGCACGAGGCCCGACGTCGAGCGCGT  
 CATCCCCGTCGTCGACGTCTACGGCTACCACCCGTCCCAGCTCGCCGCCCTGGCCGGGA  
 GGCGAGCGCGCGACACGGAGCAGTGGTTCTTCTTCTGCCCCGCGCGCCGAGCGGGAGCT  
 CCACGGCGGCCGGCCGGCGCGCACCACGCCGTGGGGTACTGGAAGGCCACGGGATCCCC  
 GTCCTGCGTCATCTCTCCGCCACAAACAGGGTCATCGGCGTCAAGCGCACCATGGTGTT  
 CTACCAGGGCCGCGCCCCCACCAGCACCAAGACCCGCTGGAAGATGAACGAGTACAAGGC  
 CGTCGCCGACGACGCCGACGCCGCCGCCGCCGCCATGCTCCACCAATGGCGCCTCCCAG

GGTACACACATGAACTGATTAATGTATGATGTGTTAATTAGTTAGTTAATTATGTGCGTG  
 AAGTGTGTTGATGTTTGTTCGAGCAGCTGAGGAACGAGCTGGGAGTGTGCCGGGTGTACAT  
 CAGCACGGGCACGCTGAGATCGTTTCGACCGCCGGCCGCTCGATAATCAAGCGGCGGCGCC  
 CACCCAGCAACAGGTGATGCCATCTTTGACGGCGGCGGCGGCGGTGAACACGAACCTCTG  
 CGGCGGCGGCGGCGGCGTCTGTTCGCCGGTGCACAAGGAGACAGCTCCCGCGACTGCAG  
 CTCGTCTGTCGGGTCGCGAGAACTCGCCGGCGGCGCCGATGGGTCTGAAGACGACGCCAT  
 CGACTGGAACCTCGCTCATCAGTAGCGCCACTGCTGATGATCTCGGCTTCAACACCGTCGT  
 TGGTTTTGATCCTAGCATCGTCGGATCATGGCCACAAGTCTAGTGCTTGATTACGCGTAA  
 TATAAAATTAATCGAGTTTAGTGATCAGTTAGTTTTTTGTTTTTTTGAAGAAGTTCAAA  
 AATTATTGCTGTGTGTTTTGCACTGAGTAGCAAAGATGGGAGGATTAGAAGATGAATCGA  
 TTAGTTTGCAAAATCAGGTGAATTAATTAGAGTAATTAACATCTGTAGTAATAGTAAGTAG  
 AAAATCAAAATGAGAAGTTGTAGCAGAAAGTATATACTACCACAAATCCGTTCTTAGTCC  
 GACTCCGAATTAATCCCAGACGGAAGATCGATCGAGACCGATTTCGGAGATGGAGCCGATT  
 TTGCTTGAAAATCAATGGAGAGGTGAAATGGGATCGGATTCATGGGCGGCTACATAAGCA  
 GGAGTCGAGAGGCCCGCACCAGCTCATCATCATCATCATCATCTCATTCCCCGCGGTT  
 CGATCCTCCTCGCGCTCTCGTCGTCTCGTCGTCTCCGGTTGATCGATCACTTCACT  
 TCAAGTCGATGTCGGCCATGGCGGCTCTCCCTGTGCTGCTCCCGACCCCGCCGAGGAGCA  
 AGATGCTGCCGTGCTCCCGACGCCGTGCCCTCGTCATCCTCCCGCCAACTTCGCCACGT  
 CGGTGGCCTCCAACCGCGCCCAAGCCCGCCGCGCCGACGCCCGACAGGTGGGACACGC  
 ACAAGAAACCCACCAGCTCGTCGTCTCGTCAAGCTCCAGCACCGGGAGCGCCAGCCGCG  
 CCGCCGCTGCGAGCGCAAAGAACCCGGCAGCCAGCGTCGTCTCGTCAAGCAGCGGCG  
 GGAAGCCCGGCCGAGCCGACTCCTGCGAGCGCTGGGACACGAACAAGGCCAAGAACCAGA  
 TCATCAGCAGCGGCCGCTCACGCCGGCGTCGTCTCGTCGACGAACGCGCGCTGGGACA  
 TGAACAAGGTCAAGAACACGGCGCCGCCGTGCAACAGCAACAAGCGGCCGGTGAGCCGCG  
 GGTCCGCTCGGCCGAGCGCTGGGACATCAGCAAGAAGCATCGCTCGCAGGACGCCGCCG  
 CCGCCGCTCTCGGCTCGGCGAGTGATCGGAAGTTGACGACGGTGGCAAAGCCGAGCAGC  
 CGCTGTTCTCTGGGCCGGCGTTCCCTGACCTCGCCGGAGCCAAGCATGCTTCCCATGCCCA  
 CCTTCTTGATGGCCCGATAGCTTCTGCTTGTCATTTCAACTTCAGATGAATCGGACTGT  
 AGTTAGGATGGGATTTGATGAAGCATGTTATTCTTTGTGGGTCTGTTTGTGATCAATTGA  
 ATTGAATTGAACTTGATTATGTTTAATTTATAGTCGTAAACTCGTAATGTCAGCTAGAA  
 CGCACATGAATGATCGATAATCTATTCCGGCTAGCTGTCCTAAACTGTAATAAGAGTTT  
 GTATATTGGGATATCTGAGTTGTCATGTTCTTATTGAAACAATGATGATCTTCACGGA

# CDS

## >ONAC017

ATGGCCACCACGAGGAGCGGCGTCGGCGGCGCCATCAGCGACCCATTTGCGACGCCGGGG  
 TTCCGCTTCTACCCGACGGAGGAGGAGCTTCTCGGCTTCTACCTCCGCCACCGCCTCGCC  
 GGCACGAGGCCCGACGTCGAGCGCGTCATCCCGTCGTGACGTCTACGGCTACCACCCG  
 TCCCAGCTCGCCGCCCTGGCCGGGAGGCGAGCGCGCGGACACGGAGCAGTGGTTCTTC  
 TTCTGCCCCGCGCCGAGCGGGAGCTCCACGGCGGCGCGCGCGGCGCGCACCACGCCGTCG  
 GGGTACTGGAAGGCCACGGGATCCCCGTCTGCGTCATCTCCTCCGCCACAAACAGGGTC  
 ATCGGCGTCAAGCGCACCATGGTGTCTACCAGGGCCGCGCCCCACCGGCACCAAGACC  
 CGCTGGAAGATGAACGAGTACAAGGCCGTCGCCGACGACGCCGACGCCGCCGCCGCCGCC  
 ATGCTCCACCCAATGGCGCCTCCCAGGCTGAGGAACGAGCTGGGAGTGTGCCGGGTGTAC  
 ATCAGCACGGGCACGCTGAGATCGTTTCGACCGCCGGCCGCTCGATAATCAAGCGGCGGCG

```

CCCACCCAGCAACAGGTGATGCCATCTTTGACGGCGGCGGCGGCGGTGAACACGAACCTC
TGC GGCGGCGGCGGCGGCGGCGTCTGTTCGCCGGTGCACAAGGAGACAGCTCCCGCGACTGC
AGCTCGTCGTCGGGGTCGCGAGAACTCGCCGGCGGCGCCGATGGGTCTGAAGACGACGCC
ATCGACTGGAACCTCGCTCATCAGTAGCGCCACTGCTGATGATCTCGGCTTCAACACCGTC
GTTGGTTTTGATCCTAGCATCGTCGGATCATGGCCACAAGTCTAG

```

#### Protein

>ONAC017

```

MATTRSGVGGAISDPFATPGFRFYPTTEEELLGFYLRHRLAGTRPDVERVIPVVDVYGYHP
SQLAALAGEASARDTEQWFFFCPRAERELHGGRPARTTPSGYWKATGSPSCVISSATNRV
IGVKRTMVFYQGRAPTGTKTRWKMNEYKAVADDADAAAAAMLHPMAPPRLRNELGVCRVY
ISTGTLRSFDRRPLDNQAAAPTQQQVMPSLTAAAVNTNLCGGGGGVVFAGAQGDSSRDC
SSSSGSRELAGGADGSEDDAIDWNSLISSATADDLGFNTVVGFDPSIVGSWPQV*

```

#### Gene Structure

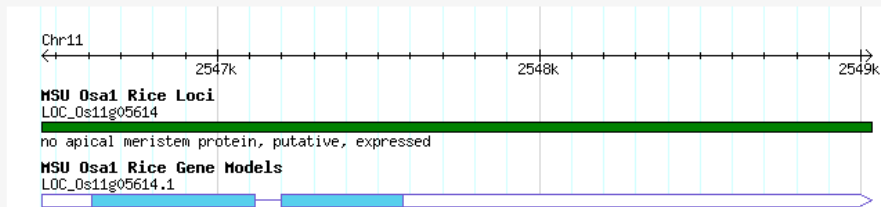

#### LOC\_Os10g38834 (ONAC018) sequence information

**Genomic sequence length:** 6594 nucleotides

**CDS length:** 1026 nucleotides

**Protein length:** 341 amino acids

Genomic Sequence

>ONAC018

```

AATTTGCTTCTCATCTTTCTTCTACTCCTCTCAAATACAAGAGCTCACACTGCTCCCT
AGCTTCCTTCTTCATCCCTTGAAGTAGTTGTGAGCTACTGACCAGCCTGAAGATAGATGC
TAGTTTGTGTAGAGAATTCGATCTTCTGAGGTGAGTTGCAGTGATCACAAGTTTTCGGTT
TCATCGATCAATTGATTTGGTGAATGAGTTGCGAGTTGGATCCACATTTTCATGTTCTCT
GTTCTTACTTTTTTTTTTAAAGAGGCTGTATGCCGTTTCTGTCTTTGATCTGTTTCGGTTA
TCCGTTTTTCATCTCTCAAAGCTATCCTTCTTTCTTGGTTTGGTAGCGATTGATGTGTCCA
CTCTATTTCCATCAGATCTTTGTCATGTCTTTAGAATTTGAGTGAAGTGTGAGGGAGC
ACAATCTCCATGCTACGATCTAACTTAGCTTGTAGTTTTTTCAACCGTTTTTAAATCTCT
TCCAATTAATTACTGGTTGGATACATATGTGATGAGAACTTACTACCGGATTTTCTTGA
TGTTTCATGTGCTGATACATCTCAACAAAATAGGTTATAATATTGACAGGAATCGACGGGAT
ATCTTCCCAGTTCCAACGTTTGATGTACTACTCTATTAGGCCATGCTCGGTTTGAAAGAG
ATTAAAGAGTATTGAGCTATTGGGCCATGTTTCGGTTTGAAAGAGATTGAAGAGTATCGAG
GGGGAATAATTTACACCACAACAGGTGTGAAATAAATCCCTCCAATCCCTAACGGAAC
ATGTTCTTACTGCAACAAGCAGTAATATGTTAACAAGAGGAAAAGTGGAAAATTATCTTT
AGACTTTGTTGATATAAACACCTTTTTATAAGTCAAATTTGACATTGGATCAAAGAGGAA
AGTAGAATTAGTCGCTATATATTGGATATATAGACTTAATTGATTCTATCTATTCCTATG

```

ATAAATACATGGTCCAAACCCAGAAATGATTTTCATCTAGAATTTAAATCAGTCCAAAGGA  
CAAAGGTTGTATCACAAGAAGATGAAAAATGTAGAGCACCCCATTTTTTGTGCAATATATT  
TTCATAGAAAAATACCAGACTCCCCCCCCCTCCCCACGGGAAAAAAATGTGGATATAGACCT  
AAAAATGTTGATATTGATGATTTTTTTTTCTTGAAAAGAACTGATATTGATGATTGATTCT  
GGTATTTTCGAACTAGATTAGTTTTTGTGTTTGTATTCCTACATATTATGTATCTTCATATTGA  
TTGTGTCACTCTCAGCAGAATGTTTGTGTTTACCAGAGCAGAATCTACTACAAAATGGTTTG  
AACCATTTTAATTTCCATAAAAAAAATTATGCCACATTAAATCAAGATAGAACAAAAAA  
TACAGAAATATGTTTATATAACCATATGTAGCTTTTTGTTGAAGTAGGGAGCTGATATAA  
TCGTTATACTCCAGAGAAGTAATTCATGGGTCTTGAGTGGAGTGCAACTGTGTATAGT  
AGATCGAAAAATCCAAACTTTTCTTATTTTCCCTATAGCAATGGAAATGAAGTACTCCCTCC  
GGGCTGATAATACTTGTCGTTTTAGACAAAAAGTGAGATCAAACTTTAAAAATATTTGATTA  
TGAATCATTTTTAAAAATATTTGTCCTTCAAATATGGTAACTATATGTATATATTAGTCTT  
AAAAAGTACTTTAATAAAAAATCATATATTTGTTAATACTTATATATATTATAATAGAAAAT  
AATGGTCAAAGTTGTTATTTGAATATCGTGTCTTATCCAAAACGACAAGTATTATCAAC  
CCGGAGGGAGTAGGAGTAAGGAACGAGAGTACCCCTTTTCCATTATTATTTTCCATAA  
TTTGAAAGCGGAATTTATAATGCATACAGTAACACGTTAAAACATTAACCATCATTA  
AAAACTTTAACCATCAATCTCAATTTAAATAATTTGATTCAACTTTTGAATGTGATATC  
ATTATGTTATTTTTCAAAAAATAGTTTCAAAATACTCACTTCGTTTTTTAATATATGAAGC  
CATTGACTTTTGACACAATGTTTAACTATTTATTTTGTGTAATAAATATAAATGTCATTTA  
TTTTGTGTAATTTGTTTTATCATTAAAGAACTATAATCTTAAGTTATACCTTTACATA  
TTTACACTAATTTTTTAATAAAAAATGAATGTATTATTAATAATTTTATATAAAAAATAGGTGG  
TAGTATTATACCCCTTGGCATATAATTTTTAAAAATTTTATACTAGTAAATAATACTCCCTC  
CATCTATTTTTGATAGTCATATTTCCAAATATGAAAATTTTATTTTTTGATAGGCATATTT  
CAATCCAACAACCTATCATCATAATGACTTCTCGGATTTAATGCATGACTCTCCATTCT  
TTCACACTAGATTGGCTACATGGGCATTGAAAATGTAAATATTAATGAATCGCATGTTTA  
CGAGAAATGACTAGTAACATGTTTAAATGGATGATAAGTAGAATTACTTATCTTTGGTCT  
GTGTGCTAAGATAAAAAATGACTATCAAAAAGTAGATGGAGGGAGTAATCAATAGTGTCTT  
AGTGACTGCACTCTCTATTCCAGAAAAAAACCAACTTCTGGCTAGATATCATCTGAGGTT  
GCTTTTTTCTAGAAAACAAATCGAGGGAGTGTAATATAAATGTGAAAATGTCACCTGTTT  
GTGGCTAGAGGGATTATATAACTTAGGGGATTAGTCAGGCATGCAACAAGTTAGTTATGC  
ATCCCCATAAAGGGCACAGGACCAGAGATGTGCCATGGAATTCCTAGACAAAGGGACAGA  
ATGGTCAGAGGCCGTGCAAGAACCAATGGTTGTGCAATGCCCTAGCTGCTTGCTGCTTT  
ATAGAGCTAGCCCCCTCAGTCCCCGGTGAGGCAGCAGGCCTGATCGATCACAAAAGGGGC  
TCTCCCATCTCCTACTGATCTCCATTTCTATTCCCTACATGTCTACTGCTACAACAAATGC  
ATGCTGATCTCTGCATGGCGTATTGCCAATGTCATTGGCATATATTGCCTTCTCTCAGTG  
TATTCTAAAAAGGATTTCTGTTTTGTGTGACGATACATTGGCATATCATATTACTGAAT  
CTCTGAATCCCTGCCTTCTCTGTGTATTGCTAACCCTAAAGAGTACTCCAGTTTGCAAT  
GCATCCATGAATCTCTGTCAAAATCTTCGTGCTAAAAGTGATGACTGTCTGTAGTAGAAG  
ACTCAACTAGCTAACATATACACTTTGTTGAGGAAAAAAGCAAGCTCAAGTTATGACAGA  
TCCTATATTCAGAAACAACATGTCTGCATCCATCCATATAGTATGTGTTACACTGGTCCA  
TGTCTCTGTAGCAGCTATGATTCACTGCTGACTATATAGCCAATATGCTCCTGATCACAG  
AGTCGACACTATCATTCACAGCCTGCAACTTTGCTGCATCCAGGCCCGCCCTGGAGCTCA  
GGCTTTGCCGTACTTTGCCAGTAGTAAAAATGTTTCAGACTTCACCATACACTATTCTACT  
ACTACCTCCGTCCCATATTACTTGTCTTTTTGAGTTTTTGTGTTATCAATGTTTGATCATT  
CGTCTTATTCAAAAAATTTTGGAAATTATTATTTATTTTGTGTTATCATTTGCTTTATTATC

AAAAGTACTTTACATATGACTTATCTTTTTTTATATTTGCACTAATTTTTCAAATAAAAT  
GAATGGTCAAACGTTGCAAATAAAAAAGTCAAAAACGTCACCTATTATGGGACGGAGGGAG  
TAGTAACTGTCTAGAAAACCAGAAAAGCAAGAACTAAACCCCAGCATGGCGCCTGCGTTAA  
ACTTTTCTGAAAAGCACTGAAACCCATGCACGCGCTTAGGCAAGTTCATGGATGGTGGTTT  
AGTTCACATCCAACCAGTAGTCAAGTATGCAGTACTGCACTACTGTCTCCTCCTGCAAAC  
TGCAACTGATGAGAACTAGCTAGCTAGCTTTGCTATATAGAAAAATGCAGCTTCGAATGA  
TTCTACCACTCGATCGCTAGCTGTGTGCATGTCTGCTTGGAGATATAAAGATTGAGTTGT  
TTGCTGAATTTTATGCATGCAGGCGTATGGTGATCATGGAGTCATGTGTGCCTCCTGGGT  
TTAGGTTCCACCCCACCGACGAGGAGCTCGTCGGCTACTACCTCCGGAAGAAGGTGGCCT  
CGCAGAAGATCGACCTCGACGTCATCCGCGACGTCGACCTCTACCGCATCGAGCCATGGG  
ATCTCCAAGGTTTAATTAATCTTCATACATATATACTTAATTTTCATGCATGCATAGCTAG  
ATCAATCGAGCTAGCTATATATAGATCGATGCTGATCATGCATGGATTGGGGTGGGTGAG  
AAGAGCATTGCAGGATAGGGTACGAGGAGCAGAGCGAGTGGTACTTCTTCAGCTACAAGG  
ACAGGAAGTACCCGACGGGGACGAGGACGAACAGGGCGACGATGACGGGGTTCTGGAAGG  
CGACGGGGAGGGACAAGGCGGTGCGTGAGAGGAGCAGGCTCATCGGGATGAGGAAGACGC  
TCGTCTTCTACAAGGGCAGGGCACCCAACGGCCACAAGACCGACTGGATCGTCCACGAGT  
ACCGCCTCGAGTCCGACGAGAACGCCCCGCTCAGGCAAGATCTCCATTTATCTCTCTCT  
CAATCAACAAGATCGATCTACAGTTTCTAGAAAAGATTAATTAGCTAGATCTTGGTTTCT  
TACGGCATCCAGTAGATTCAGTGATTCACATGCAGCAGTTTGCCGCGTAATAAAAAAAT  
GCACGCTAGCATGAGTATATGGTACAGTAGAACAGTAATGCATGAACTGATCGATGAGCA  
TTGGAAATCGTTGTGAATCTTATTGCCTTGAGGCGTGCGTAGTTTTGGCTTCTAACCTGA  
AGGCCGAATTCATCATGGACGCGCGCGCTCCTCCGATCCGCATGCTGCTGATGATGAGTT  
CAGCGGCGAACCAGTGATGGATAGCCACGTCGGCGGGAGGACTGGACTTTGGCGGAGTGT  
AGCGGCGGCGGCGGCGGCGGGAGGACGGATTGATCGGAAGTTACAGAGACGACGGCG  
CCTCGTGGATTGGGCTTACTAGGCCGAATTTGCTTTTTTGTGGCCCGGCTTATTTCTA  
AGAATAGCCCAATAGCAGCCTTGAAGGCCCAATTGGTTTAGCAAACCTTACTCTCTCTT  
CTCTTGACACGTTTAGCAAACCGCCCGTCAAACTAACGCAAGATTCGTGACAACAAAAC  
CACTTCGAAAAACGGGAGTTTTTTTTCCCGGATTTCTACTGATATCCAACGTTTAATGT  
ATAAGGGCATGTTTGATAGAACTTCAACTTCTAAATTTAGCTCTAGGAGTTGGGTTTGGA  
GTGGAATTGTGGAGCTGGCTAACCCAGCTCCACCTCTATAGATCATTTTGTGAGAGAGC  
TCCACCCAGCTTCGCTTCTATTTTTGTTGGAGCTGAAACTATTTGCCTGAGCTCCAACCTC  
CAGAAGAGATAGAGCTGGAGCTGGAGATGTGCCAAACAGGCCCTAAATTTAAATGTTTTT  
CAAACATGGGGTCGAATGTTTTTCAAACATGGGGTCGATTTTGTTCACAAGTACTCCTT  
ACTATTGATCATCGAGTCATTACCATGAATGGTGCGTGCATTGCAGGAAGAAGGCTGGG  
TGGTGTGCCGCGGTTCAAGAAAGCGAACCATGCAGCCGCCGCGGAGCTCCATCGGAGCAT  
GGGAGGCGAGCTACTCCTACCACGACCCCGCCGTCTTCGTGCGGCGGGGAACACTTCA  
AGCAAGAGGCCGCGGCCGAGCTGGACGGCGTCGCCGCCGCGCGGAGCTAACGCCTTCC  
TGCGGTACTCCACCCGCTGGCCGAGCTCCCGCAGCTGGAGAGCCCGCCGTGCCAAGCC  
AGGGGAGCCAGGCGGCCTCGGCCGTGCTCGACGGCGAGGAAGATAACGCCGATTCTAGCA  
GGCGCCCTGGCGGCGGCGGCGGCCGCCGCGGTGACCACGACTGGAGGGCGTTTCG  
ACAAGTTCGTGCGTCCCAGCTCAGCCCCGAGGAGCAGCACACCTGCCGGGCCACCGACG  
ACGACGACATGGCAGCGCTGCTGTCTCTCGACGGCGGCGGGCAGGAGGACGACGCCGGGA  
GGTGGCTGGGCTCCGCCGGTTGCTGAGCGCCGTGGCGGCCGACGCGACGACGACTGCG  
GCCTCGGCACCAGCTGCGTGCCTGGCGACATCAACTGATTCAGGGCCAAGCCGATCGAGC  
TCTCACTTCTCCTTAGCATAAAAGTGTGAGATATCTACGAATTGTATGGATGGCTATATAT

ACGTACGCCTATACATATGTAGCTGGTCAAAGCATCGTTTCAGTTTCAGTTTCAGTTCTT  
GGAAGTCAATGGATGTTGACCATATATAGCTCCATCTATCACTGCACAGATGTTAAAAA  
TCAACCATACATCTCTACTTCCCTCCATAAGATGAAACGGAGGTAGTACCTTGTTATCGAT  
GGCAATGGCATATATGCTTGGTAATAGATATGGTACATACGACCTGAGTTAATT

#### CDS

>ONAC018

ATGGTGATCATGGAGTCATGTGTGCCTCCTGGGTTTAGGTTCCACCCACCGACGAGGAG  
CTCGTCGGCTACTACCTCCGGAAGAAGGTGGCCTCGCAGAAGATCGACCTCGACGTCATC  
CGCGACGTCGACCTCTACCGCATCGAGCCATGGGATCTCCAAGAGCATTGCAGGATAGGG  
TACGAGGAGCAGAGCGAGTGGTACTTCTTCAGCTACAAGGACAGGAAGTACCCGACGGGG  
ACGAGGACGAACAGGGCGACGATGACGGGGTTCTGGAAGGCGACGGGGAGGGACAAGGCG  
GTGCGTGAGAGGAGCAGGCTCATCGGGATGAGGAAGACGCTCGTCTTCTACAAGGGCAGG  
GCACCCAACGGCCACAAGACCGACTGGATCGTCCACGAGTACCGCCTCGAGTCCGACGAG  
AACGCCCCGCCTCAGGAAGAAGGCTGGGTGGTGTGCCGCGCGTTCAAGAAGCGAACCATG  
CAGCCGCCGCGGAGCTCCATCGGAGCATGGGAGGCGAGCTACTCCTACCACGACCCCGCC  
GTCTTCGTGCGCGGCGGGGAACACTTCAAGCAAGAGGCCGCGGCCGAGCTGGACGGCGTC  
GCCGCCGCCGCCGAGCTAACGCCTTCTGCGGTACTCCACCCGCCTGGCCGAGCTCCCG  
CAGCTGGAGAGCCCCCGCTGCCAAGCCAGGGGAGCCAGGCGGCCTCGGCCGTCGTGAC  
GGCGAGGAAGATAACGCCGATTCTAGCAGGCGCCCTGGCGGCGGCGGCGGCGCGCCGCC  
GCGGTGACCACGGAAGTGGAGGGCGTTCGACAAGTTCGTGCGGTCCAGCTCAGCCCCGAG  
GAGCAGCACACCTGCCGGGCCACCGACGACGACATGGCAGCGCTGCTGCTCCTCGAC  
GGCGGCGGGCAGGAGGACGACGCCGGGAGGTGGTGGGCTCCGCCGGGTGCTGAGCGCC  
GTGGCGGCCGACGCGACGACGACTGCGGCCTCGGCACCAGCTGCGTGCCTGGCGACATC  
AACTGA

#### Protein

>ONAC018

MVIMESCVPPGFRFHPPTDEELVGYLRLKKVASQKIDLDVIRDVDLYRIEPLDLQEHCRIG  
YEEQSEWYFFSYKDRKYPTGTRTNRATMTGFWKATGRDKAVRERSRLIGMRKTLVFKGR  
APNGHKTDWIVHEYRLSDENAPPQEEGWVVCRAFKKRTMQPPRSSIGAWESYSYHDP  
VFGGGEHFKQEAELDGVAAAAGANAFRLYSTRLAELPQLESPLPSQGSQAASAVVD  
GEEDNADSSRRPGGGGGAAAAVTTDWRAFDKFVASQLSPEEQHTCRATDDDDMAALLLLD  
GGGQEDDAGRWLGSAGLLSAVAADATDCGLGTSCVPGDIN\*

#### Gene Structure

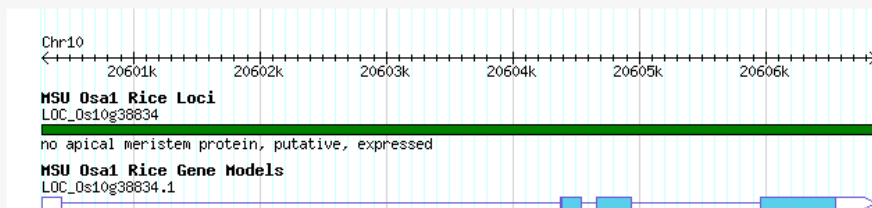

#### LOC\_Os06g01230 (ONAC019) sequence information



**Genomic sequence length:** 3228 nucleotides

**CDS length:** 1179 nucleotides

**Protein length:** 392 amino acids

Genomic Sequence

>ONAC019

```
ATATAAAGTGGTTCTCAAAAAAAAAAGTGAAAGACAGAGAGGTTCGGAGAAGGGAAAAGTGG
CGATGAAACAAGGGAAAAGTGGAGATGACGCCGGCGGTCCGCCCGCGGCGGTTCTGCCGG
TGGGGTTCCGTTTCCGGCCGACGGACGAGGAGCTGGTGAGGCACTATCTGAAGGGAAAAGA
TCGCTGGGCGGAGCCACCCTGACCTCCTCCTCATCCCGGACGTGGACCTCTCCACCTGCG
AGCCCTGGGATCTCCCGGCCATGTCCGTTATCAAGTCCGACGACCCCGAGTGGTTCTTCT
TCGCCCCCGCGACCGCAAGTATCCCGGCGGCCACCGCTCCAACCGCTCCACCGCCGCCG
GCTACTGGAAGGCCACCGCAAGGACCGCCTCATCCGCTCCCGCCCCGCGGCCCCCTCA
TCGGCATCAAGAAGACCCCTCGTCTTCCACCGCGGCAGAGCTCCGCGGGGCTCCGCACCG
CCTGGATCATGCACGAGTACCGCACCACTGAGCCTCACTTCCAATCAGGCAAAAACGTAA
GCACGACCAAATATATACTGTCTACTCCATACTCTAAATATAAATAGCTGAGCAAATCAA
ATGTGTCTATTTGCTTTAATTTGTGACGGGTAGCTTCGTTCTGTATCGCCTGTTTAAACAAG
CACGAACAAGATGATACCCATACCCCGGCCTCCAATTTGGACCAACAATTGTCCACGTCT
TCTCAAGGCAATCCCCAAAATGGCACACCTGCTGTCCAACCGGCCCTCGCCTCAATAATG
AAGGATCATCAGACCTTACCATCATCTGGTTTCAGCCAAGTACTGAAATACAAGATGCT
AGTACATCTGTCCATGACAAAGAGCAAAGTGTAGCCCATGTGAGTTTCTTATTAATTCTC
CTGCATTACTGGTCCCCATGGCATTATATGATAATAAATTTCTTTTCTTTTTTTTCTTT
TGTGTGTGTGTAAGTCTTAGGACGATGCTTTTCTGGACGTGTTATCTCAACTTCCAGACC
TAGAGCCTGAGCAAAGATACAATGGATTCCCTAATATCACCTCTCCAATTCGCCCTTACA
GCGATCACCCCTTTTGTGCGCAATCTGGGTGAGCAAGATCTTTCAGCGCATTTTGGCAGTA
CCTTGTCTGAGCAGGACCTGCAAAGTTTGTGTTTAGTCCAAATTACACCAAAATGGATA
AGCACCCCACTGGAAAAGTACAGTCTAATCCTACCGCGTCGTCCAACAATCCAAACAATA
ACACATTACTCATGGATAGTTGGAGGAAGAATGATTCATATCAGATGCTTCTAATTCAGG
TTAGAATATTCTAGAATTTACTCTTACACATTTTGACTAATCTCATGAGAACATTTTCTT
CCCTTCTATTTCTGTCTTAAACAAAGCGTGACAGACAACACAGATGCTACTTGCTGTTCT
TCTTCAATCAATGCACCACAAACAGAAACAAGTATGCTAATCTTGAAGCAAGAGCCCAG
AGTAGCAGCATGGTCTACAGTGGAGTAGCCGAGGGCTCCCCCTTGTGCAACCAAGATCAA
CTACACTCCGCATTCAATCCTCACATGGAGTCACAAAAGAGTGGAGCCTTCTGTTGGGCT
GGATTGTGGACCCCTTATCCCCAGCATTGGTTTCGATACTATCGTAGAACCGGGCAGGAGT
GGCATGACATTTTCAAGATGCCTTGAAAGAACAAGGTCAGGAACAGGCACCTTCAATGAAG
CACTTGACAGCTCAAGATCTCGTTGATCCACAACAAGGAAGTCTGCAAGAAGGATCCGC
CTTGATGCTCTGTTGAGAGGGCATCAGTCTCTCAACCTGTATCCTCACATTTGCAGAGT
GAATATGAAGCTGGATCATGCTGTAACACTCGCAATTCATCTAATAACAAGAAGGAAAGT
GTCAGGAGTGAAGATGAAGCTGGATCATGTTGTAACACTGGAAGTTCATCTAATAACCAC
AGCGAGGAAAATGACGATGCAGCCTCCAGATTATGGTACTACTACAGTTTATTGTAAGT
CTATTTACTCATAGTAGTATAGTTTTGATTAAAAATGGTCTTGATCAGGATGGAGAACCAA
TGATATTTCAGTGCAAAGAGGATACCCCTATTCAAGTGGATCATTTCAGTGGAAGTTATGG
ACAAGCTCCAAGGCTTCTCCTTTCATGGTAAGCAATCTTTGTTAAATTCGTAATTAGAAC
TTGAGACATTGAAATTTATATCTTCCACCTGGCAAAAAGAAATTTATATCTTCCTACATA
TACCTCATGAAGGGTCCTGGACTTTTTCTTTCTTGCTAGTGTAAGTGGTAGTCATCGTT
```

AATAAATATTAGTGGTGTATTTACCAAGCTAGCAAGGGTATGACATGCATTTCGCCCCTAG  
 ATCTCAAGTACAATTAGCTAATTTGAAAAAGGTCAATATTGGCTTGAGATGTCATTAATG  
 CTAAGTGTAAGAACTTGAGTTTTCTATATATTGAAAAAATATATAGTACTCCCTCCGTTC  
 CACATTATAGGATGTTTTGGCCTCTCCATCGCTCTTCTAGATTCACTACTATTCATATGA  
 ATTTGAACATATATATGTAACACATACATCGACCTATGCATGAACCTATTCAAAACCCAA  
 AACGTCTTATAATGTGAAAGTATGGGATTTTGTCCACGAACAGTAGGTCTTCGTCTCTTA  
 TCGGTATAGTTTAGAGGATGGGATCGTGTGGAACATTTGTGAAACAGACTACTGGAGCC  
 AATGTTGTTTGCAGGGCTGTTGTGGCTGAGTTATTTTTTCTCTCTGACGATGTAGCTGA  
 TCTCCTTCAATTTCCCACGTGCAGAAGAGATGTTGGTACATGCTAATCAGCCCCGTGGAA  
 CTAATCTAAAGCAGAGGCTGTTGAGAGTGGAGTCTAGAAATAGCAATGAGAATAATGTAC  
 CTTGTTGGAGACACGAGAACAGCAGCATGCACCTCATATTCAGAAATGGACTAGCTCTG  
 TTGTGCGACTAGGGTGGGGTGGCAGTGGCCGGCTCTCTTGTGATGGCCGGCTCTCTGC  
 TTTTGTGGTTGGTGTGTGGAATCTCTGAATCACACTACCTGACTAATGTAAATAAATG  
 GTCGCTTAGCTTAAGCTTGGGAGCCTCATATATACTACTACATATGTTCTTTGGAAAGTA  
 CTGCAGGTAACCTGGTTCATATAAAGAAGTTGCAAGAGTTCATTAGCTA

#### CDS

>ONAC019

ATGAAACAAGGGAAAGTGGAGATGACGCCGGCGGTGCGCCGCCGCGCGGTTCTGCCGGTG  
 GGGTTCCGTTTCCGGCCGACGGACGAGGAGCTGGTGAGGCACTATCTGAAGGGAAAGATC  
 GCTGGGCGGAGCCACCCTGACCTCCTCCTCATCCCGGACGTGGACCTCTCCACCTGCGAG  
 CCCTGGGATCTCCCGGCCATGTCCGTTATCAAGTCCGACGACCCCGAGTGGTTCTTCTTC  
 GCCCCCGCGACCGCAAGTATCCCGGCGGCCACCGCTCCAACCGCTCCACCGCCGCGGC  
 TACTGGAAGGCCACCGGCAAGGACCGCCTCATCCGCTCCCGCCCCGCGGCCCCCTCATC  
 GGCATCAAGAAGACCCCTCGTCTTCCACCGCGGCAGAGCTCCGCGGGGCTCCGCACCGCC  
 TGGATCATGCACGAGTACCGCACCACTGAGCCTCACTTCCAATCAGGCAAAAACGGTAGC  
 TTCGTTCTGTATCGCCTGTTTAACAAGCACGAACAAGATGATACCCATACCCCGGCCTCC  
 AATTTGGACCAACAATTGTCCACGTCTTCTCAAGGCAATCCCCAAAATGGCACACCTGCT  
 GTCCAACCGGCCCTCGCCTCAATAATGAAGGATCATCAGACCTTACCATCATCTGGTTTC  
 AGCCAACTGACTGAAATACAAGATGCTAGTACATCTGTCCATGACAAAGAGCAAACCTGTA  
 GCCCATGACGATGCTTTTCTGGACGTGTTATCTCAACTTCCAGACCTAGAGCCTGAGCAA  
 AGATACAATGGATTCCCTAATATCACCTCTCCAATTCGCCCTTACAGCGATCACCCTTTT  
 GTCGGCAATCTGGGTGAGCAAGATCTTTCAGCGCATTTTGGCAGTACCTTGTCTGAGCAG  
 GACCTGCAAAGTTTGTGTTTAGTCCAAATTACACCAAAATGGATAAGCACCCCACTGGA  
 AACGTAGAGTCTAATCCTACCGCGTCGTCCAACAATCCAAACAATAACACATTACTCATG  
 GATAGTTGGAGGAAGAATGATTATATCAGATGCTTCTAATTCAGACAACACAGATGCTA  
 CTTGCTGTTCTTCTTCAATCAATGCACCACAAACAGAAACAAGTGATGCTAATCTTGAAG  
 CAAGAGCCCAGAGTAGCAGCATGGTCTACAGTGGAGTAG

#### Protein

>ONAC019

MKQKQVEMTPAVAAAAVLPGVFRFRPTDEELVRHYLKGIAGRSHPDLLLIPDVDLSTCE  
 PWDLPAMSVIKSDDPEWFFFAPRDRKYPGGHRSNRSTAAGYWKATGKDRLIRSRPAGPLI  
 GIKKTLVFHRGRAPRGLRTAWIMHEYRTTEPHFQSGKNGSFVLYRLFNKHEQDDHTPAS

NLDQQLSTSSQGNPQNGTPAVQPALASIMKDHQTLPSGFSQLTEIQDASTSVHDKEQTV  
 AHDDAFLDVLSQLPDLEPEQRYNGFPNITSPIRPYSDHPFVGNLGEQDLSAHFGSTLSEQ  
 DLQSLLFSPNYTKMDKHPTGNVESNPTASSNPNNTLLMDSWRKNDSYQMLLIQTTQML  
 LAVLLQSMHHKQKQVMLILKQEPRVAAWSTVE\*

#### Gene Structure

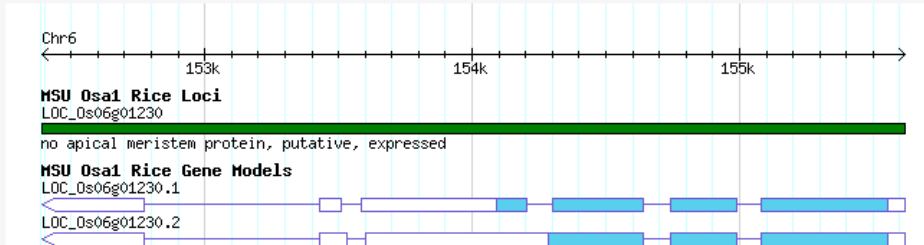

#### LOC\_Os01g01470 (ONAC020) sequence information

**Genomic sequence length:** 1828 nucleotides

**CDS length:** 963 nucleotides

**Protein length:** 320 amino acids

#### Genomic Sequence

>ONAC020

CCATCAATCTTAATTCGCTTCTACATTGGGGTGCTTGTTAATTTGCATGCGAGCTTGTTG  
 AGGTATATATGTTCAATATATGAAGAGTACTATAGCTTAATTATGTTTGCATCTAGTA  
 AGTTGAGATTTTTGGCATTACATACTACATCGATTTGCTAAATTAATTTGGTTAATGAT  
 TTGCTTATATAGATAGATATATGTATTATTGGCTATATATGTCAGGTTGAAGCTAGCGAT  
 CGTTGAGAGCAGTAGTAGGTGGTGAGCATGGGAGAGCAGCAACAGCAGGTGGAGCGGCAG  
 CCGGACCTGCCTCCGGGCTTTAGGTTTCACCCAACGGACGAGGAGATTATCACCTTTTAC  
 CTTGCACCCAAGGTTGTGGACAGCAGGGGCTTTTTCGTTGCTGCCATTGGAGAGGTGGAT  
 CTCAACAAGTGCAGCCATGGGATTTGCCAGGTAAACATTCTAGTATTATTTGAATTGA  
 GAGAAATTATATATATAAATTAGGGAAATTTATATGATATGATATGATGCATGTGAAAAGT  
 AAAAATAAATAAATGTAGGGAAGGCGAAGATGAATGGGGAGAAGGAGTGGTATTTCTACT  
 GCCAGAAGGATCGGAAGTACCCGACGGGGATGAGGACGAACAGGGCGACGGAGGCTGGAT  
 ACTGGAAGGCGACGGGGAAGGACAAGGAGATCTTCCGCGACCACCACATGCTCATCGGCA  
 TGAAGAAGACGCTCGTCTTCTACAAGGGCAGGGCTCCCAAGGGCGACAAGACCAACTGGG  
 TCATGCACGAGTACAGGCTCGCCGACGCCTCTCCGCCGCCGCCCATCCTCCGCAGAGC  
 CCCCAGAGCAGGACGACTGGGCCGTCTGCAGGATCTTCCACAAGAGCTCCGGCATCAAGA  
 AGCCGGTGCCGTTGCTCCTCATCAGGTGCCCCGCCGCCCAACTACCAGCAGCAGCAGC  
 AGATGGCCATGGCCTCCGCCGGCATCATCCAAGTCCCCATGCAGATGCAGATGCCATCCA  
 TGTCTGACCAGCTGCAGATGTTGGACGACTTCTCCACCACCGCTTCACTCTCACTCATGG  
 CGCCGCCTTCTACTCCACTCTGCCTGCAGGCTTCCCGCTTCAGATCAACAGCGGCGCCC  
 ATCCCCAGCAGTTTGTGGGAACCCGTCCATGTACTACCACCAGCAGCAGCAGATGGACA  
 TGGCCGGCGGAGGGTTCGTGGTGAGCGAGCCGTCGTCGCTGGTGGTGTGCCCGCAGGATG  
 CTGCCGACCAGAACAACAACGCCGCCGACATCTCGTCGATGGCATGCAACATGGACGCTG  
 CCATCTGGAAGTACTGAAATACATACCATACATACATATATACATATGCATGCGCGAGCT  
 TAATTAGTGTGATGACAGAGGGTGGTGGGTAAATTAGCTAGTATACTCCATTTTATGCAT

CCATCATATGGCTTTTGCATTGCCTTTAATTTTGGCTTCTTGTGTGAGATCGATGTGAGT  
 GAGATTTGCTGAGAGATTATTATTATTAGTTATTATAGATTGCATGGCTAGCTATATTGT  
 ACTACTAATAATATGTGTCTGCCAGCAATACGTATGTGTGTGAGCGTGCACCGTATAGCA  
 AGGTATAGTTACAGGTATATACATACAAGATATATATAGGTATACATGCATGCGTGATAG  
 ATATATGTGTGTATTTGTGCGTGAGCCCAGCTTGATTTGTGTTGTACATAGCTAGCAGTG  
 CATGCCTGCTATTCCCTCTGTATGGATTGAATTATGTGAATTAATTATTTGTTTAATTAC  
 AACATGCATGGTGTATGGTGTACTTATT

#### CDS

>ONAC020

ATGGGAGAGCAGCAACAGCAGGTGGAGCGGCAGCCGGACCTGCCTCCGGGCTTTAGGTTT  
 CACCCAACGGACGAGGAGATTATCACCTTTTACCTTGCACCCAAGGTTGTGGACAGCAGG  
 GGCTTTTGC GTTGTGCCATTGGAGAGGTGGATCTCAACAAGTGCAGCCATGGGATTTG  
 CCAGGGAAGGCGAAGATGAATGGGGAGAAGGAGTGGTATTTCTACTGCCAGAAGGATCGG  
 AAGTACCCGACGGGGATGAGGACGAACAGGGCGACGGAGGCTGGATACTGGAAGGCGACG  
 GGAAGGACAAGGAGATCTTCCGCGACCACCACATGCTCATCGGCATGAAGAAGACGCTC  
 GTCTTCTACAAGGGCAGGGCTCCCAAGGGCGACAAGACCAACTGGGTCATGCACGAGTAC  
 AGGCTCGCCGACGCCTCTCCGCGCCGCCCATCCTCCGCAGAGCCCCCGAGGCAGGAC  
 GACTGGGCCGTCTGCAGGATCTTCCACAAGAGCTCCGGCATCAAGAAGCCGGTGCCGGTT  
 GCTCCTCATCAGGTGCCCCGCCGCCGCAACTACCAGCAGCAGCAGCAGATGGCCATGGCC  
 TCCGCCGGCATCATCCAAGTCCCCATGCAGATGCAGATGCCATCCATGTCTGACCAGCTG  
 CAGATGTTGGACGACTTCTCCACCACCGCTTCACTCTCACTCATGGCGCCGCCTTCCTAC  
 TCCACTCTGCCTGCAGGCTTCCCGCTTCAGATCAACAGCGGGCGCCCATCCCCAGCAGTTT  
 GTTGGGAACCCGTCCATGTACTACCACCAGCAGCAGCAGATGGACATGGCCGGCGGAGGG  
 TTCGTGGTGAGCGAGCCGTCGTCGCTGGTGGTGTGCGCCGAGGATGCTGCCGACCAGAAC  
 AACAACGCCGCCGACATCTCGTCGATGGCATGCAACATGGACGCTGCCATCTGGAAGTAC  
 TGA

#### Protein

>ONAC020

MGEQQQQVERQPDLPFGFRFHPTDEEIIITFY LAPKVDSRGFCVAAIGEVDLNKCEPDDL  
 PGKAKMNGEKEWYFYCQKDRKYPTGMRTNRATEAGYWKATGKDKEIFRDHMLIGMKTL  
 VFYKGRAPKGDKNWVMHEYRLADASPPPPSSAEPPRQDDWAVCRIFHKSSGIKKPVPV  
 APHQVPAAANYQQQQQMAMASAGIIQVPMQMQMPSMSDQLQMLDDFSTTASLSLMAPPSY  
 STLPAGFPLQINSGAHPQQFVGNPSMYHQQQQMDMAGGGFVVSEPSSLVSPQDAADQN  
 NNAADISSMACNMDAAIWKY\*

#### Gene Structure

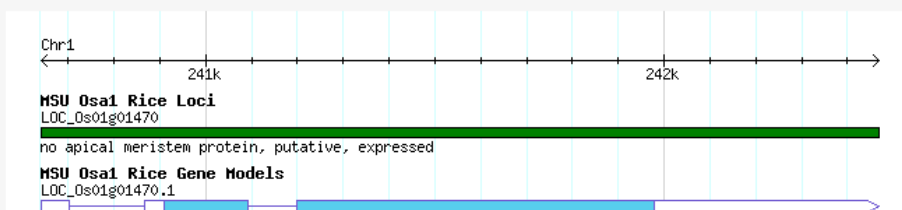

**LOC\_Os09g12380 (ONAC021) sequence information****Genomic sequence length:** 1640 nucleotides**CDS length:** 1488 nucleotides**Protein length:** 495 amino acids

Genomic Sequence

&gt;ONAC021

ACTAGCTCCACTCCTGCCCAGCCAAGAATCACCGATCCTGCCATGGCCGACGCCGACGCC  
 GACGCGTGCCCCGCCGTCTTCGCCTCGCGCCACCCACCGAGCAGGAGCTCATCTCCTCC  
 TACCTTCACCCTCGCCTCCTCCTCACCACCACCAAGCCCCGCCGCCGCTCGCCGCTGGC  
 GCGGTACCGAGCTTCATCCACCACGCCGACGCGTACGCCGCCGACCCGGCCGACCTCACG  
 GCGAGGCACCTCCCGGCGCGCGCCGCGGACGGCTCCAGGGCGTGGTACTTCTTCTCCCCC  
 GTGCGGACCACCACCGAGCGCGGGACGCGGCGGGCGCGCGCGGTGGAGTCCGGGGACGGG  
 TGCTGGCACTCGGAGTCGGGCGTCCGTGCCGTGTCGACGCCGCCGGCCGCCGCGTCGGG  
 CACCGGCAGTTCTTCTCCTTCGTCAAGAAGAGGGAGGAGGACGGCAAGCGGGTTCGCACC  
 GGGTGGCTCATGGTGGAGCTCGGCGTCGACAACGATGCTGCTTCAGCCTCCTCCTCCAAT  
 GAGCTGGTGTGTGTAAGATTTACATGACGCCACGCATGCCGCCGCCCTCGCCGCCGAGC  
 GCCGTGACGTCGTGCGGCGGCGGCGACCATGGAGCTGATGCCACGCGCGCCGCCGCCGTCG  
 GCGCCGAGCGCCGTGACGTCGCCGGCGGCGACGACCATGGAGCTGATGGCTGGAGGAGTA  
 CACAAGAGGAGGAAGATATCCGATGAGATTGCAGCTGCCGCAACACCGCCGCATCCACAA  
 CAACAACGACGACAGCGCTGTGTTCCAGACAACGACGGATCAAAAGAGAGCTCCGGCGAA  
 TCATCATCTGTGGTCACTACTCGATGACGACGACGACGATGCTGATGCTCCGGAAGATGGT  
 GGTGCTGTCAGATCAAAACTGAGGTGCGGACGATGGCGTCATGCTGGCCGATGCTCGAGAC  
 GACGAACAACACGCCGCAACATCCGACTCCATGGCCGGAACATCCGGTGGCGCCGTCACG  
 GGAGGAGGACACGGAAGCTTCTTCCCGACCTCAACGTCGTCGCAACCGTGGCGCACGAC  
 GACGAAGGCCGCCACGCACGGGGCGCACCCGCGGCCACAAGACGGCGGCACCAGCACGACG  
 ACGACGATGGTGGCCAGCGCCGGCGCCGAGCGCGGCAGCACGACGGGCCACCTGCCGGCC  
 GCCACCGCCGGGTACCGTCGAACGCTGATGCTCTTCCCTGGAGGAGGAGGACGACGACGCC  
 GTGGAGGATGAGCAGCAGCAGCAGCAGGCGCCGCCGCTGCCACCCGCGACGTCGACGGCG  
 ACGACGACGACGAGGACGGCGGCGGAAGCCAATGTGCAGCGGCAGCGGCAGCCACCGTGT  
 TGTACATTTGTGGTGACCCGTGCGCGGTGCACGCGAAGATGCGACACGGCGCGGCCTAC  
 GGGTGCGGCTGCCGTGTGACCGGCGCTGTCCGGAGAGGCGGTTACCATCTGCCGAGGCGT  
 GCAGTACATACTACGACTACTGGACAGTAGTTTATATACGACTTGTGCTCCCTCCCGTC  
 CTCACAAGAATGCGATTGTAGCATTCAAATTTTGTACTGTACAATAGAGAATATAACAAG  
 AGTGTGTGACTTCCCATCTA

CDS

&gt;ONAC021

ATGGCCGACGCCGACGCCGACGCGTGCCCCGCCGTCTTCGCCTCGCGCCACCCACCGAG  
 CAGGAGCTCATCTCCTCCTACCTTCACCCTCGCCTCCTCCTCACCACCACCAAGCCCCGC  
 GCCGCCGTCGCCGCTGGCGGCGTACCGAGCTTCATCCACCACGCCGACGCGTACGCCGCC  
 GACCCGGCCGACCTCACGGCGAGGACCTCCCGGCGCGCGCCGCGGACGGCTCCAGGGCG  
 TGGTACTTCTTCTCCCCCGTGCGGACCACCACCGAGCGCGGGACGCGGCGGGCGCGCGCG  
 GTGGAGTCCGGGGACGGGTGCTGGCACTCGGAGTCGGGCGTCCGTGCCGTGTCGACGCC

GCCGGCCGCCGCGTCGGGCACCGGCAGTTCTTCTCCTTCGTCAAGAAGAGGGAGGAGGAC  
 GGCAAGCGGGTTCGCACCGGGTGGCTCATGGTGGAGCTCGGCGTCGACAACGATGCTGCT  
 TCAGCCTCCTCCTCCAATGAGCTGGTGTGTGTAAGATTTACATGACGCCACGCATGCCG  
 CCGCCCTCGCCGCCGAGCGCCGTGACGTCGTCGGCGGCGGCGACCATGGAGCTGATGCCA  
 CGCGCGCCGCCCGCTCGGCGCCGAGCGCCGTGACGTCGCGGCGGCGGACGACCATGGAG  
 CTGATGGCTGGAGGAGTACACAAGAGGAGGAAGATATCCGATGAGATTGCAGCTGCCGCA  
 ACACCGCCGCATCCACAACAACAACGACGACAGCGCTGTGTTCCAGACAACGACGGATCA  
 AAAGAGAGCTCCGGCGAATCATCATCTGTGGTCATACTCGATGACGACGACGACGATGCT  
 GATGCTCCGGAAGATGGTGGTGCTGTCAGATCAAACTGAGGTCGGACGATGGCGTCATG  
 CTGGCCGATGCTCGAGACGACGAACAACACGCCGCAACATCCGACTCCATGGCCGGAACA  
 TCCGGTGGCGCCGTCACGGGAGGAGGACACGAAAAGCTTCTTCCCGACCTAACGTCGTC  
 GCAACCGTGGCGCACGACGACGAAGGCCGCCACGCACGGGGCGCACCGCGGCCACAAGAC  
 GGCGGCACCAGCACGACGACGACGATGGTGGCCAGCGCCGGCGCCGAGCGCGGCAGCACG  
 ACGGGCCACCTGCCGGCCGCCACCGCCGGGTACCGTCGAACGCTGATGCTCTTCTTGAG  
 GAGGAGGACGACGACGCCGTGGAGGATGAGCAGCAGCAGCAGCAGGCGCCGCCGCTGCCA  
 CCCGCGACGTCGACGGCGACGACGACGACGAGGACGGCGGCGGAAGCCAATGTGCAGCGG  
 CAGCGGCAGCCACCGTGTGTACATTTGTGGTGCACCCGTGCGCGGTGCACGCGAAGATG  
 CGACACGGCGCGGCTACGGGTGCGGCTGCCGTGTGACCGGCGCTGTCCGGAGAGGCGGT  
 TACCATCTGCCGAGGCGTGCAGTACATACTACGACTACTGGACAGTAG

#### Protein

>ONAC021

MADADADACPAVFASRHPTEQELISSYLHPRLLLTTTKPAAVAAGGVPSFIHHADAYAA  
 DPADLTARHLPARAADGSRAWYFFSPVRTTTERGTRRRARAVESGDGCWHSESGVRVAVDA  
 AGRRVGHRQFFSFVKKREEDGKRVRTGWLMLVGLVDNDAASASSSNELVLCKIYMTPRMP  
 PPSPPSAVTSSAAATMELMPRAPPPSAPSAVTSPAATTMELMAGGVHKRRKISDEIAAAA  
 TPPHPQQRRQRCPDNDGSKESSGESSVVLDDDDDDADAPEDGGAVRSKLRSDDGVM  
 LADARDDEQHAATSDSMAGTSGGAVTGGGHGKLLPDLNVVATVAHDDEGRHARGAPRPQD  
 GGTSTTTTMMASAGAERGSTTGHLPAAATAGYRRTLMFLFLEEDDDAVEDEQQQQQAPPLP  
 PATSTATTTTTRTAAEANVQRQRQPPCCTFVVHPCAVHAKMRHGAAYGCGCRVTGAVRRGG  
 YHLPRRAVHTTTTGQ\*

#### Gene Structure

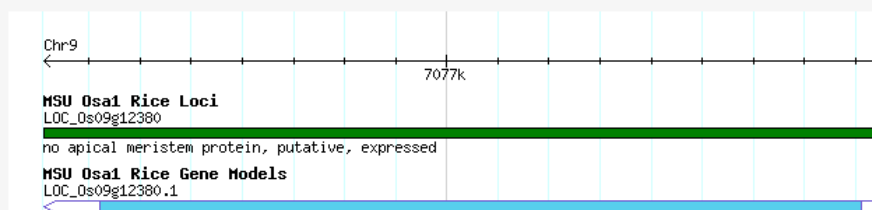

#### LOC\_Os03g04070 (ONAC022)sequence information

**Genomic sequence length:** 1894 nucleotides

**CDS length:** 951 nucleotides

**Protein length:** 316 amino acids

## Genomic Sequence

&gt;ONAC022

ATCTCCACCTCACCTCGTCCATCGTCTCCAGTAAAAATCAAGATCGGCAAGCCAAGTGCA  
 GAGGCAACCACCACCACCTGGAGCAGAGCGAGCGAGCGAGCAGAGCACACTGT  
 CATCAATGGCGGCGGCAGTGGCTGTGGCTGGGCCGTCCATGGAGGTGGAGCAGGACCTCC  
 CGGGCTTCCGTTTCCACCCACGAGGAGGAGCTCCTCGACTTCTACCTCTCCCGCGTCG  
 TCCTAGGCAAGAAGCTCCACTTCAACATCATCGGCACCCTCAACATCTACCGCCATGATC  
 CCTGGGACCTCCCAGGTAAACACCAACACACAGTGAGAGTTCAGCAAGAACGGAGACAGT  
 GTTTGAGCTGGATGATCTGATGATGATGATGTGTGTGTTTCTTGTAATAATGTGCAGGCA  
 TGGCGAAGATCGGGGAGAGGGAGTGGTACTTCTTCGTGCCGCGGGACAGGAAGGCCGGGA  
 ACGGCGGGCGGCCGAACCGGACGACGGAGCGCGGGTTCGGAAGGCGACGGGGTTCGGACA  
 GGGCGATCCGGAGCTCCGGCGACCCGAAGCGGGTGATCGGGCTCAAGAAGACGCTCGTCT  
 TCTACCAGGGTCGCGCCCCGCGCGGCACCAAGACGGACTGGGTCATGAACGAGTACCGCC  
 TCCCCGACTACGGCGCCGCCCGCGCCCGCCCTCCAAGGTAAACTAATGCTCT  
 CTTAGCAATTAACAAGAACAATCAGTTGCAGAGTTAATTATTAGAACGAATCCTTTAAGT  
 GATCGCAAAATATTAGTACTACTGAATTCTTAAATGGTCACAAAAAATGATCGGAAT  
 GAAGTGAGAATGATCATGTCATTTATTTCTTTTTTGAACGAACAATGATCATGTCATATG  
 TAGTACTAGTATTAGAGTATTAGTACATTGGCAGTGAATGCTCTCATTAAATTTGGTTGTT  
 TTTGGTGTGAAAATGGGGTGCAATGTAGTCGTTGTCCCAGTAGACTTGCAGTATCAATGA  
 TGTAGATATTCCACGAAAGCGCACCAAGCATTAAAGAATTAAGAATTGACACGGTTGACTT  
 GGGAGTTGACTGCCTTGATTTTTACCATTGTACATGTAAATTTACTCCAGAGAACAATA  
 CTCCACTAGTAGTACAATTTTAACTTGGATTTTTCTCACACTGTGTTTGGCGGCAGGAGG  
 ACATGGTGCTCTGCAAGATATACCGGAAGGCGACGCCACTGAAGGAGCTGGAGCAGAGAG  
 CCTCGGCAATGGAAGAGATGCAGAGAGGATCAAGTCACGGAGACTACACGGCGACGAGAG  
 CATCCCTCGTCCACGACGCCCTCCGCCCTCCACCGCGACGACTACTTCTCGTCGGACGACG  
 TCCACGACAGCGGCTTCTGATCCAGTCCTCATCTCGTCGGCGGGCGCCGTCCGGCAGCA  
 GCAGCAAGAACGGCGGCGCTGGCGCACCAAGGGAAGCCAAGAAGGAAGAAGCAGACGTCA  
 CGGTCACGGTGGCGTCGGCGACGAGCCTACAGCTCCCGGCGGTGAGCCAGCTGCCGAGCC  
 TGCAGCTTCCGGCGATGGACTGGCTGCAGGACCCGTTCTTGACGCAGCTGCGCAGCCCGT  
 GGCAGGACCAGCACTGCCTGTCTCCCTACGCCATCTGCTCTACTACTAAGCAAGGGGCA  
 GAGAATTACATTGTGCATCGAAGCAAGAGGAGTCGATCACGATCTCCAGATGCATGTGCA  
 AGAGCAAGAGATCAATCACCCGTCGACGAAGAACAAGTAGCGTAGAATGGCTAGCTGTG  
 GATTCGATTGTACATATAGTAGTAGCACCAGAGATATCAATCAATCTTTTGGTCTTCTCTC  
 AAGATAATATGATGCTTTCTGACTTGACAATGCT

## CDS

&gt;ONAC022

ATGGCGGCGGCAGTGGCTGTGGCTGGGCCGTCCATGGAGGTGGAGCAGGACCTCCCGGGC  
 TTCCGTTTCCACCCACGAGGAGGAGCTCCTCGACTTCTACCTCTCCCGCGTCGTCCTA  
 GGCAAGAAGCTCCACTTCAACATCATCGGCACCCTCAACATCTACCGCCATGATCCCTGG  
 GACCTCCCAGGCATGGCGAAGATCGGGGAGAGGGAGTGGTACTTCTTCGTGCCGCGGGAC  
 AGGAAGGCCGGGAACGGCGGGCGGCCGAACCGGACGACGGAGCGCGGGTTCGGAAGGCG  
 ACGGGGTTCGGACAGGGCGATCCGGAGCTCCGGCGACCCGAAGCGGGTGATCGGGCTCAAG  
 AAGACGCTCGTCTTCTACCAGGGTCGCGCCCCGCGCGGCACCAAGACGGACTGGGTCATG

AACGAGTACCGCCTCCCCGACTACGGCGCCGCCCGCGCCGCCCGCCTCCCAAGGAG  
 GACATGGTGTCTGTGAAGATATACCGGAAGGCGACGCCACTGAAGGAGCTGGAGCAGAGA  
 GCCTCGGCAATGGAAGAGATGCAGAGAGGATCAAGTCACGGAGACTACACGGCGACGAGA  
 GCATCCCTCGTCCACGACGCCTCCGCCTCCACCGGCGACGACTACTTCTCGTCGGACGAC  
 GTCCACGACAGCGGCTTCCTGATCCAGTCCCTCATCCTCGTCGGCGGCGCCGTCCGGCAGC  
 AGCAGCAAGAACGGCGGCGCTGGCGCACCAAGGGAAGCCAAGAAGGAAGAAGCAGACGTC  
 ACGGTCACGGTGGCGTCGGCGACGAGCCTACAGCTCCCGGCGGTGAGCCAGCTGCCGAGC  
 CTGCAGCTTCCGGCGATGGACTGGCTGCAGGACCCGTTCTTGACGCAGCTGCGCAGCCCG  
 TGGCAGGACCAGCACTGCCTGTCTCCCTACGCCCATCTGCTCTACTACTAA

#### Protein

>ONAC022

MAAAVAVAGPSMEVEQDLPGFRFHPTTEEELLDLYLSRVVLGKKLHFNIIGTLNIYRHDPW  
 DLPGMAKIGEREWYFFVPRDRKAGNGGRPNRTTERGFWKATGSDRAIRSSGDPKRVIGLK  
 KTLVIFYQGRAPRGTKTDWVMNEYRLPDYGAARAAAPPPKEDMVLCKIYRKATPLKELEQR  
 ASAMEEMQRGSSHGDTATRASLVHDASASTGDDYFSSDDVHDSGFLIQSSSSAAPSGS  
 SSKNGGAGAPREAKKEEADVTVTVASATSLQLPAVSQPLSLQLPAMDWLQDPFLTQLRSP  
 WQDQHCLSPYAHLLYY\*

#### Gene Structure

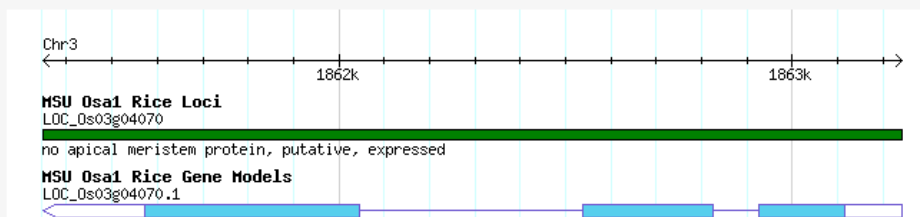

#### LOC\_Os02g12310 (ONAC023) sequence information

**Genomic sequence length:** 1862 nucleotides

**CDS length:** 759 nucleotides

**Protein length:** 252 amino acids

**Putative Function:** no apical meristem protein, putative, expressed

#### Genomic Sequence

> **ONAC023**

CATCACAAAACACATAAACTATATCATCATCTTCCATAGCTGTACACATCCTATATTTT  
 CATTCATGGCGATGACACCGCAGCTAGCATTTTCTCGCATGCCTCCAGGGTTTCGGTTCC  
 AGCCGACGGACGAGCAGCTTGTCTGCTGACTACTTGCAGAGGCGTACCGCTGCGCAGCCAT  
 GCGTTACTCCCGACATCACCGATATCGACGTTTACAACGTCGACCCGTGGCAGCTTCCAG  
 GTGCTATATATATGCGCACTTTAATTTGCATGAGCCTCACTACATACGGTGCTCTCTACT  
 GGTAGTAGAAATCAATCTAAACCGTTAATCTTATTTGACCGAATGGTTCAGAGATCTATT  
 TATATTATGGTAGTAAAAATCGTGGATGGGTGTTATCGTCAGAAAAAAAATAGGGGTGAA  
 GGGTATAGTCGTCATTTAGCAGTGGCTAAACTCTTTTTTCTCCTTTTTTGGCTTTTTCGA  
 TGAAATATGAGCGATGCCAGCGCAATAGATGATCATAGATCAATTTAGCTGAGAAAAAAC



ATAAATGACAAAATAATTTCTAATCATTGTATTAGTAAATTACTAATTTACCTTAATAAT  
 ACTGATACTAGTAGTATAATACTACCAGTAGAGAGCACCAGAGCGTCGATTTGCATACGA  
 GGCAGGGCGGAGGCAGGCCTAGGACAGGTAGGGCTTAAGCCCTAGGCTTGTTGCCTCCAA  
 AATCATGGTTAAACTCTCTTAAATCATCATTTAAATTTGGGAAAAGAAATGAATAACTAA  
 TTAATAACACCCCTACCTTTGTCCCTACTCTTAGAGTCCGTCACCTGCATACGCCGAAGTTCT  
 ATTGATAGAGCAGAAAAAAATTACAAAAATTATAACCCTGAAATGTCGAAACCAGGAAAAA  
 GGAAAAAATATATATTGATTGTGACCCTGATAGATGCGATACTAATGCAACATATATTGA  
 CTGTGTTTGTAGCCATGGCGATGTATGGATCGGATCATGACCGGTACTTCTTCACGATGG  
 CGGCCCCGAGAGGCGCAGGCCAGACGAACGACACCGTCGGGTTTCTGGAAGCCCACCGGCA  
 CAAAGAAGACGATCTTCGTCGTCGCCGGTGGGCATGAGGTGCCCACCGCCGTCAGAGGA  
 GGTTCGTCTTCTACCTCGGCCACCACCAACCATCGGGCAGCAACAACAACAAAACAT  
 CATGGATCATGCATGAGTACCGTCTCATGAACTCTCCAAGAGCGGCAGTGCCGTCGTCTT  
 CTTCCGTGAATCGTCTTCCCACTGATGATCTCACGGAAGAGATGGTGCTGTGTAGGATCT  
 CCAACAAGGACCTGCCTAAACCACCCCTTCATCCACAACAGCTTGTTGCAGTTCTCTTCAG  
 TGGGGTTGAATGGTGATGGGTATAATTACTTGATCCTTGATCACCTTGAGCCTCCAGCAA  
 TGGAGTATCCTAATGTTGGCATTGGTAATGTTGATGATGCTGCTGCTGGTACTGATGATC  
 CGGGTGACCTTGATGAGGAGATTGATGATAGCATGCAAAGAAACCATGGTGGCTAGAATT  
 AACCAGTAGCATCATGAGTGAATGGTTTTGCGGGAGATTTGAGTTAAATATCAGATAATA  
 AAATAATAATACAAAGAATAAAAAAGAAAAACAAACCTGTATAGTTAGCAGGTTTTGATTC  
 ATTTTCGTTGAACTTTGTGTGCTTGTTAGCTAGCCTATATACCAAACATGCCTTGGCGAGG  
 CTTTCTATTTGTATATAGCTTTTTTTCTTTTTTCTATTGTAAGGTTTCAACTCTATTGAG  
 TTGATTGAATAAACATTATGCAATTTATGTAACATATTGTCTATAAAGTTCTATTGGCAT  
 GC

CDS

> **ONAC023**

ATGGCGATGACACCGCAGCTAGCATTTTCTCGCATGCCTCCAGGGTTTCGGTTCCAGCCG  
 ACGGACGAGCAGCTTGTGTCGACTACTTGACAGAGGCGTACCGCTGCGCAGCCATGCGTT  
 ACTCCCACATCACCGATATCGACGTTTACAACGTCGACCCGTGGCAGCTTCCAGCCATG  
 GCGATGTATGGATCGGATCATGACCGGTACTTCTTCACGATGGCGGCCCCGAGAGGCGCAG  
 GCCAGACGAACGACACCGTCGGGTTTCTGGAAGCCCACCGGCACAAAGAAGACGATCTTC  
 GTCGTCGCCGGTGGGCATGAGGTGCCACCGCCGTCAAGAGGAGGTTTCGTCTTCTACCTC  
 GGCCACCACCAACCATCGGGCAGCAACAACAACAAAACATCATGGATCATGCATGAG  
 TACCGTCTCATGAACTCTCCAAGAGCGGCAGTGCCGTCGTCTTCTTCGGTGAATCGTCTT  
 CCCACTGATGATCTCACGGAAGAGATGGTGCTGTGTAGGATCTCCAACAAGGACCTGCCT  
 AAACCACCCCTTCATCCACAACAGCTTGTTGCAGTTCTCTTCAGTGGGGTTGAATGGTGAT  
 GGGTATAATTACTTGATCCTTGATCACCTTGAGCCTCCAGCAATGGAGTATCCTAATGTT  
 GGCATTGGTAATGTTGATGATGCTGCTGCTGGTACTGATGATCCGGGTGACCTTGATGAG  
 GAGATTGATGATAGCATGCAAAGAAACCATGGTGGCTAG

Protein

> **ONAC023**

MAMTPQLAFSRMPGFRFQPTDEQLVVDYLQRRTAAPCVTPDITDIDVYNVDPWQLPAM  
 AMYGSDDHRYFFTMAREAQARRTTPSGFWKPTGKKTIFVVAGGHEVPTAVKRRFVFYL

GHHQPSGSNNNNKTSWIMHEYRLMNSPRAAVPSSSSVNRLPTDDLTEEMVLCRISNKDLP  
 KPPFIHNSLLQFSSVGLNGDGYNYLILDHLEPPAMEYPNVGIGNVDDAAAGTDDPGDLDE  
 EIDDSMQRNHGG\*

### Gene Structure

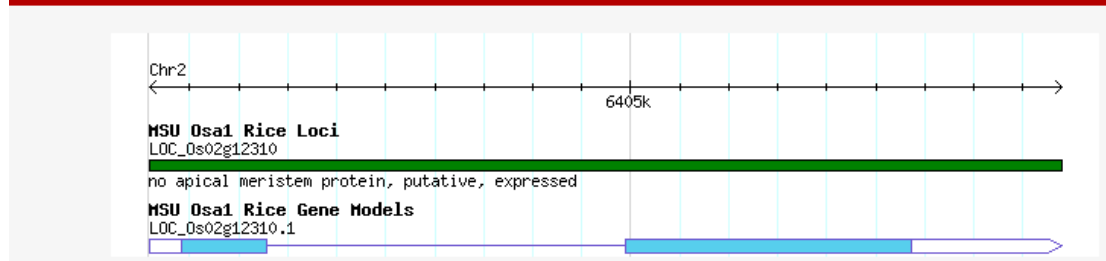

### LOC\_Os05g34310 (ONAC024) sequence information

**Genomic sequence length:** 1901 nucleotides

**CDS length:** 933 nucleotides

**Protein length:** 310 amino acids

Genomic Sequence

>ONAC024

ATCTCCACAAGAGAACTAGGATCTTCAAGTATAGCTAGCATTGCGCCCTCATTTTCATC  
 CATGGCAATGCAGCTGTCCTTGCCGTGCTTGCCAACGGGTTTTTCGTTTCCATCCAACCGA  
 TGAGGAACTAGTCATCAACTACCTCCAGAGGCGTGCTACCGGGCTATCGTGCCCCATCCC  
 CATAATCGCAGATGTCGAAATATACTCAACTTCAACCCGTGGGAGCTTCCATGTAAGCCATA  
 TGTGTAGTCTAGTGTGCATTAATATTTATGCTTGATTATAGAATGGATGAACTTACCAAC  
 TACTATACACAATGTGTTAATGATATTGGTGTTCAGCCATGGCTCTATTTGGGGAACAT  
 GAGTGGTACTTTTTTACACTACGCGACCACAGGTACCCCAATAGTGTGCGCCCTAGTCGC  
 TCAGCGGCGTCAGGCTTTTGAAGGCCACCGGCACTGACAAGCCCGTCCAAGTTGCTAAC  
 ATGCAAAGCACTCCTGTAGCTATGAAGAAGGCACTTGTATTCTATGTTGGCCGCCCCGCC  
 ATGGAACCAAGACTACATGGATCATGCATGAGTACCGTCTCACAACACGGGAGGGTCC  
 ACTGCCTCCCACCCATCCTTGCTTCATCCACCGCACACCCTTCTGTGAAGGTACAAACA  
 ACACAACTATATTGAGAAATTATTTTTTTTCTTGAGAGAATGGTCCTTCGTTTTTAGTG  
 TGTCGTCTGTTTAGTTATGAAATCTTTGACAAGGTAATACATGACAAAATTCGACTTCT  
 GTAACCTGTAGAAAAAACTAACTACACTCCTCCTTGCAAAAGAAAAACAGAGTACATAT  
 TCCATTCCCTAGTCGATCTCAATCGTTAGTTCATCATATATGCAAGGCTTAATATCTCCCC  
 CTTTTTACTGATCTTACCAATAGATTAACCATGTTATCATGGATCTATATGCGTATATA  
 TGCAGCTAGACGAGTGGGTGCTATGCAAGATCTTCAACAAGTCCCCAGAGCCGACAACA  
 CCGCACCACCATCAACGTCGTCTCACGGTTACAGTGCTCGCCGCCGCTGCCGCCGCCG  
 CGGCACCGCCCGGCAACTACCCGCCGCTGCCGGTGGGTGCGACGAACGACGGCGGCGTGT  
 TCGCCGGCGCCGGCGACATGCTCTTACCATCCAAGAGCACCAGGAGGGAACACCATCGA  
 TGCTGCCGCCGATCCCTAACCTTGAGCCACCGCGGCAACAATTGGGAATTCCTCTCTCA  
 ATGGCACTGCTGCTGCTGCTGCTGCTGCTGATGGCCATGGCCGCCTTGAGGAAGAGGACA  
 CCAGCGCTACACCTTACCGACCAGGAAATGGAGCAGATGCTCATGGACCTGATGGACC  
 AGGATTTCTTTGGCAATGATCAACCCAGGAGTGAAGTGTGTGGTGGAGTGATTTTCATA  
 TCATTCCATAGCTCTGATCTGTGCTGGAGAGTGAATTTAGTATCTATTGTACCAGATAGA  
 ATAAACCAGAAAAAGAAATAAAGAAGGCCAAAGAAAAAGCAAAAAGAAAATTGTATAA

TTACTAGGTTTGGATGCCGTCTGTAGAACCTTGTGTGCTATGTAACTTTTTCTTTGTAT  
 TTTGGCATTTTCATCATATTGTGTCATAAATAAAGCAGGGCTTTCTTTTGTAGTTGCCA  
 TCTCAATCTTGCACCGTGATGTTATAAAAAACAAAATTAATTATTGTGCTACACTGTAC  
 TTTTGGCTGTGTTCCGGCAGCAATCTTTCCCAACTCATCTTCATCGTCTTTTGCACGCACC  
 CTTTTTAAACAGCTAAACAGTTACGAAAGTTGTTTTAAAAATTATATTAATTCATTTTTT  
 AAAAAGTATCTAACACTTAATGAAGCGTGCCTAACTATTT

#### CDS

>ONAC024

ATGGCAATGCAGCTGTCCTTGCCCTGTCTTGCCAACGGGTTTTTCGTTTCCATCCAACCGAT  
 GAGGAACTAGTCATCAACTACCTCCAGAGGCGTGCTACCGGGCTATCGTGCCCCATCCCC  
 ATAATCGCAGATGTCGAAATATACAACTTCAACCCGTGGGAGCTTCCATCCATGGCTCTA  
 TTTGGGGAACATGAGTGGTACTTTTTTACACTACGCGACCACAGGTACCCCAATAGTGTG  
 CGCCCTAGTCGCTCAGCGGCGTCAGGCTTTTGGAAGGCCACCGGCACTGACAAGCCCGTC  
 CAAGTTGCTAACATGCAAAGCACTCCTGTAGCTATGAAGAAGGCACTTGTATTCTATGTT  
 GGCCGCCGCCCATGGAACCAAGACTACATGGATCATGCATGAGTACCGTCTCACAAAC  
 ACGGGAGGGTCCACTGCCTCCCACCCATCCTTGTCTTCATCCACCGCACACCCTTCTGTG  
 AAGCTAGACGAGTGGGTGCTATGCAAGATCTTCAACAAGTCCCCAGAGCCGGACAACACC  
 GCACCACCATCAAACGTCGTCTCACGGTTACAGTGCTCGCCGCCGCTGCCGCCGCCGGCG  
 GCACCGCCCGGCAACTACCCGCCGCTGCCGGTGGGTGCGACGAACGACGGCGGCGTGTTC  
 GCCGGCGCCGGCGACATGCTCTTACCATCCAAGAGCACCAGGAGGGAACACCATCGATG  
 CTGCCGCCGATCCCTAACCTTGAGCCACCGCGCGCAACAATTGGGAATTCCTCTCTCAAT  
 GGCACTGCTGCTGCTGCTGCTGCTGATGGCCATGGCCGCCTTGAGGAAGAGGACACC  
 AGCGCCTACACCTTCACCGACCAGGAAATGGAGCAGATGCTCATGGACCTGATGGACCAG  
 GATTTCTTTGGCAATGATCAACCCAGGAGTGA

#### Protein

>ONAC024

MAMQLSLPVLPTGFRFHPTDEELVINYLQRRATGLSCPPIIADVEIYNFNPWELPSMAL  
 FGEHEWYFFTLRDHRYPNVSRPSRSAASGFWKATGTDKPVQVANMQSTPVAMKKALVFYV  
 GRPPMETKTTWIMHEYRLTNTGGSTASHPSLSSTAHPVSVKLDEWVLCKIFNKSPEPDNT  
 APPSNVVSRLQCSPLPPPAAPPGNYPPLPVGATNDGGVFAGAGDMLFTIQEHQEGTPSM  
 LPPIPNLEPPAATIGNSSLNGTAAAAAADGHRLEEDTSAYTFTDQEMEQLMDLMDQ  
 DFFGNDQPQE\*

#### Gene Structure

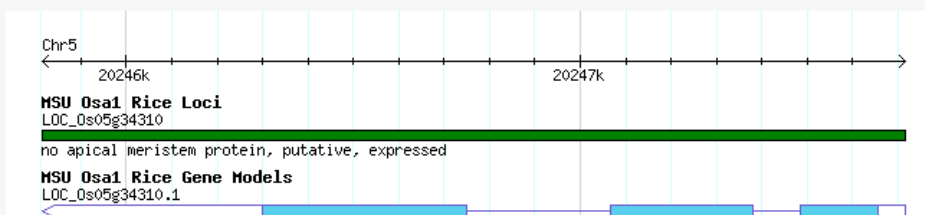

**LOC\_Os11g31330 (ONAC025) sequence information****Genomic sequence length:** 2370 nucleotides**CDS length:** 903 nucleotides**Protein length:** 300 amino acids

Genomic Sequence

&gt;ONAC025

ATCACTGCAGTGCCTTTGAGCTTTCGTTCTCTAGAGTGTCTAGGGTGAATCTTGAGCGAG  
 TGAGCGAGCGATCTCTGTGTTGTGTAGTTTGTGAGCTAGGGTGATGGCTAACACCGGACT  
 TAGCATCCCCATGGTGAATGGTGCCACAATCCACCTCCTCCCTGGTTTCCGGTTCCGTCC  
 AACTGACGATGAGCTAGTCATCAAAATACCTCTACCCCCGTGCTTTTCATGTGCCACTGCC  
 CTGTGCGATCATCACCGATGTTGACATCCATCATCACAACCCCTGGGACATCGTCCCAGG  
 TTAATTTTGATATGCACTTCTTTGCTTCTATGAAAATTATTACCACATCCGTCTGCATAT  
 ATCTCTGATTTGACTGATTAATTGCATGTGTGTCCTGACGATATTTATTCTCTTGTTTTG  
 TTTATCATTTTTTTTCGTTTGTTCGTTGGCAACGATCTGATGATGAAGTGGCGGAGAGGGA  
 GAAAGGGAAGCACTTCTTCACAAGAAAGGAGGTCAAGTACCCTGGTAGCCGCCGTAGCAA  
 CCGTGTTGCTGGTAATGGCTTCTGGAGAGCAGCAGGCTCGGAGGTGCCCATCTATTACAA  
 ACCAGAAGGTGCTGCTAACGACATGCTAGTTGGGATGAGGCGGACTCTAGTGTTCCTACTA  
 CGGAAAGTCACGATCTGCAGAGCGCACTGAATGGGCCATGCATGAGTTTCAGCTTGCTGG  
 TGCTGGTCTCCTTCCTCACCCCTATGATGAGGCATGCAACCAGCAATGGTTCAGAGCCACC  
 CTGTGGCTGCCTTGAAGCGACAATCGCTAAGGTGAGATGCTACGTCCAAAAATTTTACTG  
 TTCCATTTATCATGATTCCATCTAAATGCCTGTTGAATTAATTTGCTCAATTATTTGGAT  
 AGGTTGGATTATGAGTTTATAGCTTTAGGGAATGGGGAAAAATATGATGACTTAGTATACGT  
 GATGATATACTATAACTCTTGTGTTGATTTATTAATAAGGGAAGGGTAGTTGTTTTCGA  
 TCTTAGGACTAAGGGTACGTGACGCTTGATATAGGGTTCATTTATTGTTGCCATGCAAGA  
 TGCGCGGGATCTAGAAGTGATTCAAATTTTGTCTGACAAGGAATCTAGAGGTGGTGGGC  
 CTGCTGATTTGAATTTGTCATAGCCTCACATGGTTTTCTTATGTATTACTAGGATGTAA  
 TGATGATTAATTGATTTTGCCGTGAAGCGAGATCTAGCGGTTACAAGATCTACTAGTGAT  
 TCAAATATATTGAGAAAAAAGGGGTTTGTCTGCTACTTGCATTTTCAGTAGGGAACCTC  
 TTTATTGAACACCACGTGTCATGATACTTGATACTGGGATATTTGGATTTGTACATCT  
 GGTTTTAATTTGATCATTGCCACAAGATTTATATAAGTGACATGTCAACAGTTTACTTCT  
 CAAATTAGTTGCAACATTCAAACCTGGACATGAAGTTATCACACATCTTTCTAATTCAGTC  
 CCCATATGATTTGTACAGTAAGAGGCTTATAAACTAGTTTACTATAATGGTCAATTCAT  
 CTATTCTCTTTGTTGTATATGTTGTATATACCATGGTTGCACCTTAAGTAGATCCACTAA  
 CAGACAAAATGGTGTCTATTTTACAGAAAAGTGATGGTCTCTCTGCAACTCTTCGTGCCA  
 AGCGTGATTCTGCCCCCTTATGAGAATCATGGTAGAACCCGATAGCTCATGGGTGATCT  
 GCTGCATCTACAAGAAGAGGCAGCGTGCCCCGCCTGTTGTTATCCCTCCTGTCATTGGCG  
 ATGTAGGGGAAGCTATCATCCCTCATGCTATTGGCGATGCAAGGGAAGGCCAACTTCACT  
 TCATTGACTTCCTGGGGCAGCCAGCTCGCAATGATCCATCCTCGCCCCATAGCTGCACCA  
 TTGACCCCTCCTCTTTGGAGGAAGGGAGTGATGAGTCTGCCGGTGATGGTGAAGATAAGG  
 ATGGTGATGGCATGAATGAAGCAAATTGATCGAGTGTGAAGGAAGTGAAGTGAAGTCTCAA  
 GAATAAAAACTGCAAGTATGGCGCTCCATTCCATGGAAGACCTGCATGCATCCTATATAT  
 GTGCTTTTATGTTCAAGTTGGAGAACTATGTGTGTTGTCTTTAAGTTGGAGTACTCTAAG  
 CTATTCGATCTGGAGATTATGCTGTTTTTAATAAAAAGTTTGAAGTGTATCTGTCCTGTTT  
 AATTAGTTTCAAGAAAAGCCAAGCGTGTGTTGGGTTCTAGGATGAACAAAGTCGTCCAAGAT

GCAAGAAGTTCTAGAGAGGTAGCTACATTTCTGGAAATTGTTGCATCTTCCTTTCTTCAA  
TATATATATATTGTCCATTTCATAATGTC

#### CDS

>ONAC025

ATGGCTAACACCGGACTTAGCATCCCCATGGTGAATGGTGCCACAATCCACCTCCTCCCT  
GGTTTCCGGTTCCGTCCAACCTGACGATGAGCTAGTCATCAAATACCTCTACCCCCGTGCT  
TTTCATGTGCCACTGCCCTGTGCGATCATCACCGATGTTGACATCCATCATCACAACCCC  
TGGGACATCGTCCCAGTGGCGGAGAGGGAGAAAGGGAAGCACTTCTTCACAAGAAAGGAG  
GTCAAGTACCCTGGTAGCCGCCGTAGCAACCGTGTGCTGGTAATGGCTTCTGGAGAGCA  
GCAGGCTCGGAGGTGCCCATCTATTACAAACCAGAAGGTGCTGCTAACGACATGCTAGTT  
GGGATGAGGCGGACTCTAGTGTCCACTACGAAAGTCACGATCTGCAGAGCGCACTGAA  
TGGGCCATGCATGAGTTTCAGCTTGCTGGTGTCTCCTTCCTCACCCTATGATGAGG  
CATGCAACCAGCAATGGTTCAGAGCCACCCTGTGGCTGCCTGAAGCGACAATCGCTAAG  
AAAAGTGATGGTCTCTCTGCAACTCTTCGTGCCAAGCGTGATTCTGCCCCCTCTTATGAGA  
ATCATGGTAGAACCCGATAGCTCATGGGTGATCTGCTGCATCTACAAGAAGAGGCAGCGT  
GCCCCGCTGTTGTTATCCCTCCTGTCATTGGCGATGTAGGGGAAGCTATCATCCCTCAT  
GCTATTGGCGATGCAAGGGAAGGCCAACTTCACTTCATTGACTTCCTGGGGCAGCCAGCT  
CGCAATGATCCATCCTCGCCCCATAGCTGCACCATTGACCCCTCCTCTTTGGAGGAAGGG  
AGTGATGAGTCTGCCGGTGATGGTGAAGATAAGGATGGTGATGGCATGAATGAAGCAAAT  
TGA

#### Protein

>ONAC025

MANTGLSIPMVNGATIHLLPGFRFRPTDDELVIKYLYPRAFHVPLPCAIITDVDIHHHNP  
WDIVPVAEREKGKHFTRKEVKYPGSRNSRVAGNGFWRAAGSEVP IYKPEGAANDMLV  
GMRRTL VFHYGKSRSAERTEWAMHEFQLAGAGLLPHPMRHSNGSEPPCGCLEATIAK  
KSDGLSATLRAKRDSAPLMRIMVEPDSSWVICCIYKKRQRAPPVVIPPVIGDVGEAII PH  
AIGDAREGQLHFIDFLGQPARNDPSSPHSCTIDPSSLEEGSDESAGDGEDKDGDMNEAN

\*

#### Gene Structure

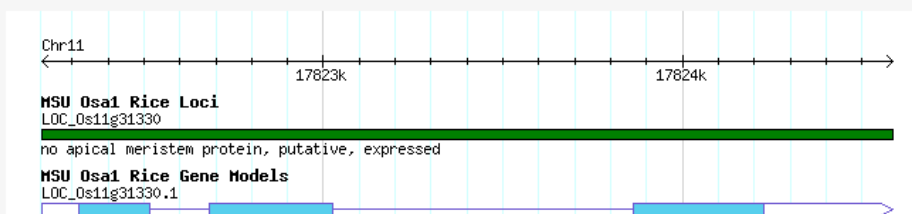

#### LOC\_Os01g29840 (ONAC026) sequence information

**Genomic sequence length:** 2114 nucleotides

**CDS length:** 1002 nucleotides

**Protein length:** 333 amino acids

## Genomic Sequence

&gt;ONAC026

ATTCATCACAACACCATCCATCCATCTTAATTCGCTTCTACATTGGGGCGCTTGTTAATT  
 TACATGCGAGCTTGTTGAGGTATGTTCAATATATGAGGACTAGCTTAATTATGTTTGCAC  
 TATTTAGAAGTTGAGATTTTCGGCATTACAAAACATCGATTTGCTAAATTTGGTTAAT  
 GATTTGCTTATATATGTATTATTGGTTATATATGTCAGGTTGAAGCGATCGAGATCATCG  
 TTGAGAGCTGTAGTACGTGGTGAGCATGGGAGAGCAGCAGCAGGTTGGAGCGGCAGCC  
 TGACCTGCCTCCGGGCTTTAGGTTTCACCCAACGGACGAGGAGATCATCACCTTTTACCT  
 TGCACCCAAGGTTGTGGACAGCAGGGGCTTTTGGCTGGCTGCCATTGGAGAGGTGGATCT  
 CAACAAGTGCGAGCCATGGGACTTGCCAGGTAACATCATATAGTATTAGTTTGAATTGA  
 AAAAAATTATATATATATAAATTAGGGAAATTTATATATATGATATGATGTGAAAAAA  
 AATGTAGGGAAGGCGAAGATGAACGGGGAGAAGGAGTGGTATTTCTACTGCCAGAAGGAT  
 CGGAAGTATCCGACGGGGATGAGGACGAACAGGGCGACGGAGGCGGGATACTGGAAGGCG  
 ACGGGGAAGGACAAGGAGATCTTCCGCAACCACCACATGCTCATCGGCATGAAGAAGACG  
 CTCGTCTTCTACAAGGGCAGGGCTCCCAAGGGCGACAAGACCAACTGGGTCATGCACGAG  
 TACAGGCTCGCCGACGCCCTCTCCGCCACAGCCGCCGCCGCCATCCTCCGCAGAGCCC  
 CCGAGGCAGGACGACTGGGCCGTGTGCAGGATCTTCCACAAGAGCTCCGGCATCAAGAAG  
 CCGGTGCAGGTGCCCATGCAGATGCCGATGCAGATGCAGATGCCGTTGCTCATCAGGTG  
 CCCGCCGCAACTACCAGCAGCAGATGGCCATGGCCTCCGCCAGCATCATCAAGTCCCC  
 ATGCAGATGCAGATGCCCTCCATGTCTGACCAGCTGCAGATGTTGGACGACTTCTCCACC  
 GGTTCATCATGGCGCCGCCCTCCGCCCTCCCTACTCCACTCTACCTGGCTTCCCG  
 CTTCAGATCAACGGCGGCGCCAGCAGTTTGTGGGAACCCGTCGATGTACTACCAGCAG  
 CAGCAGCAGCAGCAGCAGCAGCAGATGGACATGGCCGCCGGAGGCTTCGTGGTGAGCGAG  
 CCGTCGTGCTGGTGGTGTGCGCCGAGGATGCTGCCGACCAGAACACGCCGCCGACATC  
 TCGTCGGTGGCATGCAACATGGACGCTACCATCTGGAAGTACTGATACATACATACATAC  
 ATACATACATACATAGATACATACATGCATGCGCCGATGCGCGAGTGTGATGACAGAGGG  
 TGGTGGGTAAATTAGCTATACTCCATTTTTATGCATATGCATCATGGCTTTTGCATTGCC  
 TTTGGCTTCTTGTGTGATCGATGTGAGTGAGATTTGCTGAGAGATTATTAGTTATTATAG  
 ATTGGCTAGCTATATTATCATATACTGTATGTACTAATAATATGTGTGTACCAGCAATAT  
 GTATGTGTGTGAGCGTGCAGCCGTGCACCGTATAGCAAGGTATAGTTACAGGTATATACA  
 TACAAGATATATATAGGTATACATGCATGCCGTGATAGATAAATGTGTGTACTGCATGTAT  
 TTGTGCGTGAGCCCAGCTTGATTGTGTTGTACATAGCTAGCAGTGCATGCCTTCTATCCC  
 TCCGTACGGATTGAATTATGTGAATTAATTATTTTGTTTAATTATAACATGCATGGTGTA  
 TGGTGTACTTATTATATACTATGAACCTTAATTTTCAGGTGATACGATCGACTAGCTAGTT  
 TTCATATGTACTCTAATTAGGTGTTCTTGCATTAATTCATCATTCAATTTATGTAGCTAAT  
 ATCCATTTTGGTGTGGATATATAGGAACAAAATTAAAACATGCATGGGACCGCATGTCTA  
 CGGTCTACCTAACATTCCGCATGATTTGCGTTGCCATCTCAGTTTAAAAAAAATGAACGG  
 TCTGATTCAGTGAC

## CDS

&gt;ONAC026

ATGGGAGAGCAGCAGCAGCAGGTTGGAGCGGCAGCCTGACCTGCCTCCGGGCTTTAGGTTT  
 CACCCAACGGACGAGGAGATCATCACCTTTTACCTTGCACCCAAGGTTGTGGACAGCAGG  
 GGCTTTTGGCTGGCTGCCATTGGAGAGGTGGATCTCAACAAGTGCGAGCCATGGGACTTG

CCAGGGAAGGCGAAGATGAACGGGGAGAAGGAGTGGTATTTCTACTGCCAGAAGGATCGG  
 AAGTATCCGACGGGGATGAGGACGAACAGGGCGACGGAGGCGGGATACTGGAAGGCGACG  
 GGAAGGACAAGGAGATCTTCCGCAACCACCACATGCTCATCGGCATGAAGAAGACGCTC  
 GTCTTCTACAAGGGCAGGGCTCCCAAGGGCGACAAGACCAACTGGGTCATGCACGAGTAC  
 AGGCTCGCCGACGCCTCTCCGCCACAGCCGCCGCCGCCGCCATCCTCCGCAGAGCCCCCG  
 AGGCAGGACGACTGGGCCGTGTGCAGGATCTTCCACAAGAGCTCCGGCATCAAGAAGCCG  
 GTGCAGGTGCCCATGCAGATGCCGATGCAGATGCAGATGCCGGTTGCTCATCAGGTGCCC  
 GCCGCCAACTACCAGCAGCAGATGGCCATGGCCTCCGCCAGCATCATCCAAGTCCCCATG  
 CAGATGCAGATGCCCTCCATGTCTGACCAGCTGCAGATGTTGGACGACTTCTCCACCGGT  
 TCACTCATGGCGCCGCTCCGCCTCCGCCTTCCCTACTCCACTCTACCTGGCTTCCCGCTT  
 CAGATCAACGGCGGCGCCAGCAGTTTGTGGAACCCGTCGATGTACTACCAGCAGCAG  
 CAGCAGCAGCAGCAGCAGCAGATGGACATGGCCGCCGAGGCTTCGTGGTGAGCGAGCCG  
 TCGTCGCTGGTGGTGTGCGCCGAGGATGCTGCCGACCAGAACAACGCCGCCGACATCTCG  
 TCGGTGGCATGCAACATGGACGCTACCATCTGGAAGTACTGA

#### Protein

>ONAC026

MGEQQQQVERQPDLPFGFRFHPTDEEIIITFY LAPKVVD SRGFCVAAI GEVDLNKCEP WDL  
 PGKAKMNGEKEWYFYCQKDRKYPTGMRTNRATEAGYWKATGKDKEIFRNHHMLIGMKKTL  
 VFYKGRAPKGDKNWVMHEYRLADASPPQPPPPSSAEPPRQDDWAVCRIFHKSSG IKKP  
 VQVPMQMMPQMMPVAHQVPAANYQQQMAMASASIIQVPMQMMPMSDQLQMLDDFSTG  
 SLMAPPPPPPSYSTLPGFPLQINGGAQQFVGNPSMYQQQQQQQQQMDMAAGGFVVSEP  
 SSLVSPQDAADQNNADISSVACNMDATIWKY\*

#### Gene Structure

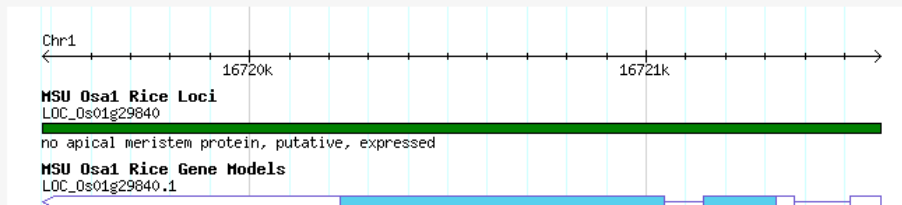

#### LOC\_Os02g34970 (ONAC028) sequence information

**Genomic sequence length:** 1328 nucleotides

**CDS length:** 615 nucleotides

**Protein length:** 204 amino acids

Genomic Sequence

>ONAC028

AAGCTTCCCATTTCAAATTCATCAATATCCCAGCCAAGTTGCATTTGACTGCAGTTTGTA  
 AGTTGCACTTGTAGTTGTAGCATGGGAGGAGCTACAACTTACCTCCAGGTTTCCACTTC  
 TTCCCCCTCGGATGAAGAGCTCGTCGTCCATTTCTCCGTCGCAAGGTCTCCCTCCTCCCA  
 TGCCACCCTGACATCATCCCGACGCTGCTTCCGCATCGGTACAATCCATGGGAGCTGAAT  
 GGTAAGTCTGCAACTGCATTGATCAATATGATTTCACTAATTTGTTCTCTTACAAGTCAT  
 GCTGAGTGCTGATAGAAATTGCAATTTTAAGGCAAAGCACTGCAAGCTGGGAACCAGTGG

TACTTCTTCTGCCATCTAACACAAAGTAGGACCTCATCCAATGGGCACTGGAGCCCCATT  
 GGAGTTGATGAAACAGTAAGAAGCGGCGGCCGCAATGTTGGCTTGAAGAAAACGCTGCTA  
 TTCTCCATTGGAGAGCCCTCTGAAGGCATCAGAACCAACTGGATCATGCATGAGTACCAT  
 CTGCTAGACGGGGATTGCGTCGCTGGCGGTAGCAGCAACTTGA TAGCTCGAGCTCTAAC  
 AGGAGGTCTCATAGGAAGAGAGGCCACTCAAGCATGGTAAGTGATGCATATCCTCTCTAT  
 CTTGCTGCTCGATCAGCAGTCAACAGTTCAGTAAATTGCGTATAAGGAGTAACTGGAGCA  
 CAAAATACTAAAATTTATGCATGATCATTACAGGAGTCCAACA ACTGGGTGCTGTGCCGA  
 GTGTTGCAATCGAGCTGCGGTTCA CAAGTGAGCTTCCACGGTGAGGGCACCGAGCTTTCA  
 TGCTTAGATGAGGTGTTTTTGTCACTAGATGACTACGATGAAGTAAGTTTGCCGAATAAA  
 TAGAAATATAGAACCTAGCTAAGTCAGTACTCGTTAGAGCTGACAGTAGGTCCTATGCCT  
 ATCAAACCATTTGATTAGCTATGGCCGGGTATGTTGATGATATCTATACATAATCTGTT  
 GCATTATGAATAATTAATGGTCTGGGAGGCATTGAACCCAATCCAGTCCATCCTAGATA  
 ATTACCATGTAATTAGTTATCCCCAACGAGTATGTTGGGCTTGTGTCAGACAACTGTGG  
 CATATGTGTGAAGCACAAAGTCGCTTCTAAAAAGATGAGTTTTTTTTTCTCGTTTCTCGCA  
 TATGGTGGTCTACTTTGGCTCATGAAGCATTCAAAATTTTAATATAATCAAAGCATGCAC  
 TTCATGCAGCTTGTGGTATATACAAATCTAGAAATATAACTATTTATAAGCTTGTGTAGT  
 TGCTTGCT

#### CDS

>ONAC028

ATGGGAGGAGCTACAACTTACCTCCAGGTTTCCACTTCTTCCCCTCGGATGAAGAGCTC  
 GTCGTCCATTTCCCTCCGTCGCAAGGTCTCCCTCCTCCCATGCCACCCTGACATCATCCCG  
 ACGCTGCTTCCGCATCGGTACAATCCATGGGAGCTGAATGGCAAAGCACTGCAAGCTGGG  
 AACCAGTGGTACTTCTTCTGCCATCTAACACAAAGTAGGACCTCATCCAATGGGCACTGG  
 AGCCCCATTGGAGTTGATGAAACAGTAAGAAGCGGCGGCCGCAATGTTGGCTTGAAGAAA  
 ACGCTGCTATTCTCCATTGGAGAGCCCTCTGAAGGCATCAGAACCAACTGGATCATGCAT  
 GAGTACCATCTGCTAGACGGGGATTGCGTCGCTGGCGGTAGCAGCAACTTGA TAGCTCG  
 AGCTCTAACAGGAGGTCTCATAGGAAGAGAGGCCACTCAAGCATGGAGTCCAACA ACTGG  
 GTGCTGTGCCGAGTGTTGCAATCGAGCTGCGGTTCA CAAGTGAGCTTCCACGGTGAGGGC  
 ACCGAGCTTTCATGCTTAGATGAGGTGTTTTTGTCACTAGATGACTACGATGAAGTAAGT  
 TTGCCGAATAAATAG

#### Protein

>ONAC028

MGGATNLPPGFHFFPSDEELVVHFLRRKVSLLPCHPDI IPTLLPHRYNPWELNGKALQAG  
 NQWYFFCHLTQSRTSSNGHWSPIGVDETVRSGGRNVGLKKTLLFSIGEPSEGI RTNWIMH  
 EYHLLDGD CVAGGSSNLTSSSSNRRSHRKRGHSSMESNNWVLCRVFESSCGSQVSFHGEG  
 TELSCLDEVFLSLDDYDEVSLPNK\*



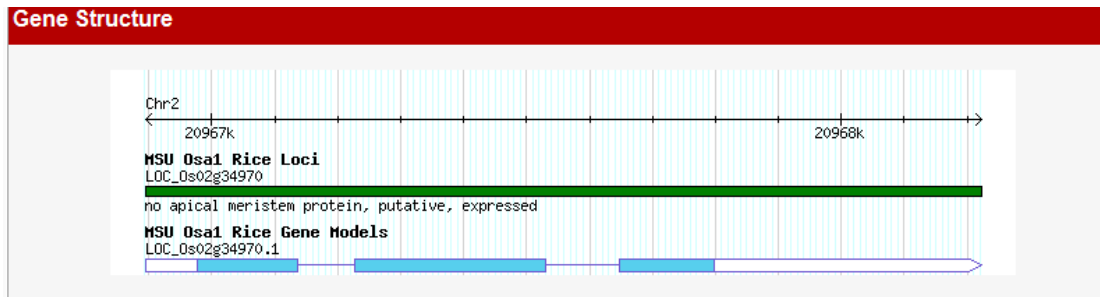

### LOC\_Os08g02300 (ONAC029) sequence information

**Genomic sequence length:** 2499 nucleotides

**CDS length:** 1203 nucleotides

**Protein length:** 400 amino acids

Genomic Sequence

>ONAC029

```

GTCCATCCTTCTCCCAATCAAGCATCCATCCATCCTCCCCAACTATATATAAACCCACACA
CCTTTCCTCGCCACCGCCCTCGATCGTCTTCTTCTCCTCCTCTCAATCTCTTCTCCT
TCTCCTGCAGCCGCCATTTCTAGCTAGCTATACGATCGATCTATACATATATATCAGAAG
GAAGGAAGAGGCTAATTAAGCTAGCTGTTGCTAGAGCTAGCAAGAGCGAGGAGATTGAGC
AGCTAGGTAGGTAGCAAGAAGGAGAAGAAGAAGATCATCAATGAGCATCTCGGTGAA
CGGGCAGTCGTGCGTGCCGCCGGGGTTCCGGTTCCACCCGACGGAGGAGGAGCTGCTCAA
CTACTACCTCCGCAAGAAGGTCGCCTCCGAGCAGATCGACCTCGACGTCATCCGCGACGT
CGACCTCAACAAGCTCGAGCCATGGGACATCCAAGGTAGCTAAGCTAGTATTCCCTCATCA
TATAACCTTTCTCCTCTCCAATTCTCAATTTCTAGCTACCAAATCGATGATGGATTTATC
AATCAATCGAGCTAAGCTAGCTAAGTAATGGTGTGTGTGCAAAATATATATTGTGGTTGC
AGAGAGGTGTAAGATTGGGTCAGGGCCGCAGAACGACTGGTACTTCTTCAGCCACAAGGA
CAAGAAGTACCCGACGGGGACGAGGACGAACAGGGCGACGGCGGCCGGGTTCTGGAAGGC
CACCGGCCGCGACAAGGCCATCTACAACGCCGTCCACCGCATTGGCATGCGCAAGACGCT
CGTCTTCTACAAGGGCCGCGCCCCCACGGCCAGAAGTCCGACTGGATCATGCACGAGTA
CCGCCTCGACGACCCCGCCACCGACACCGCCGCCACACCCACGGTACGTACGTACCT
GCTCCGGCTAGCCGGCCGGCCGGCCGGGTACATGTAGCGACAATTAATTATTAGAGAG
GAAGAAGATGATGAATGAAGTGGTGGTGCAACAATGTCCGGCAATGCAATGATAGAGGAC
TAGTTAGTGTTTTCAATTCGATCTAACCTTGATCATTGCCTTTAGCTAGCAAATAATTAA
CCTAGCTTGTAGCTTTTTTCCATGTGATTTCATGTGCACCAACCCACCCAAAAAGTTTGAAA
TAATTAGGATCGAGTACTTAGCTGCTAGGGATTAATTATGTACGTTTATATGATTTGAAA
TTTTTGATGTTAATTTGATGATGATATATGGTATGATATGCATGGATGGTTAGGTTACTT
CTGCTGCTGCTGCGGCGGCGCGATGGCGGCGGCGGCGGACGGCGGGCAGGAGGATGGCT
GGGTGGTGTGCAGGGTGTTCAGAAGAAGCACCACCACAAGGAGGCCGGCGGCGGCGGCG
GCAAGCACGGCGGCGACGGCAGCGCCGGCGCCAAGGCGGCGCACGCTTACTCCTCCAGCG
ACGACGCGCTCGACCAGATCCTGCAGTACATGGGCAGGTCGTGCAAGCAGGAGCACGAGC
TCCCCTCGCCGAGGCCAGCGGCGGCGGCGGCGGCGGCGCAGGAGCAGGCCGGCGTCGA
GGTACCTCCGGCCAATCGACACCGTGCTCGGCGGCCATGGCTTCATGAAGCTGCCGCCGC
TCGAGAGCCCGTCGGCCGCCACGGCGCTCTCCTCCACTCCGAGCACGGCGGCGACGCGG
CCTCCTCGGCCGCCGCCGCCGCCGCCGCCGCCGCCGCCGCCGCCGCCGCCGCCGCCGCCGCC
ACTGGGCCATGATGGACCGCTCGTCGCGTCGCACCTCAACGGCGCCAACCTCCGACGCGC

```

CCGACGACCAGCTCTGCTTCGACGCCGCCGACGACGACGGCCTCGCCTACTACTCCGCCG  
 CCCCCACGAGGCTGCTCGGCGGTGCCAACGCCGGCACCAGACGACGACCTGTGGAGCTTCG  
 CGCGGTGCGCTGCGCCGCCACCGCCGCCGCCGCCGTCGTCGGCCACGCCAGAGCGTC  
 TCAGCCACGTGGCACTGTAACACATGATTTCGTAGCTGTACGTACACGTACACGTATACGT  
 ACACGTCAGGCTACGTACGCTCGAGCTGCCACCCTAGCTGCTAGTACAGTAATTACAGAG  
 ACAAGACAAGTAAGAAGAAAAATTGTAAGTAAAAAAAAAATAAAAGCAAGAGAGAGAGAG  
 AGAGAGAGATCCACCATGAATGATACTGATAGAGAGACATCATTCGATCGATATATTTCA  
 AAGGTGATTAGCAAAGATCGAGTGATTAATTAATTAGTGAGTGAGACACTGAGAAAAGAA  
 AGAAAGAAAAGAAAAGAAAAATTAAGGAGCCAAAAGAGAGGAGGAGAAAAAAGAAGAAGAA  
 GAGAGATTAAAGGCAAAGCGAGTAGTAAGTTAGGGTGGCACTGTCAAACATGTCTGCATC  
 CAATGTTTAATTAATTAATTAACCCCTACTACCTGTCCAGGACAGAAAAATATATATTAGC  
 ATCTCATTACTTATAATATACTCCCTCCGTTTAAAAATA

## CDS

### >ONAC029

ATGAGCATCTCGGTGAACGGGCAGTCGTGCGTGCCGCCGGGGTTCCGGTTCCACCCGACG  
 GAGGAGGAGCTGCTCAACTACTACCTCCGCAAGAAGGTGCGCTCCGAGCAGATCGACCTC  
 GACGTCATCCGCGACGTCGACCTCAACAAGCTCGAGCCATGGGACATCCAAGAGAGGTGT  
 AAGATTGGGTGAGGGCCGAGAACGACTGGTACTTCTTCAGCCACAAGGACAAGAAGTAC  
 CCGACGGGGACGAGGACGAACAGGGCGACGGCGGCCGGGTCTGGAAGGCCACCGGCCGC  
 GACAAGGCCATCTACAACGCCGTCCACCGCATTGGCATGCGCAAGACGCTCGTCTTCTAC  
 AAGGGCCGCGCCCCCACGGCCAGAAGTCCGACTGGATCATGCACGAGTACCGCCTCGAC  
 GACCCCGCCACCGACACCGCCGCCACACCCACGGTTACTTCTGCTGCTGCTGCGGCG  
 GCGGCGATGGCGGCGGCGGCGGACGGCGGGCAGGAGGATGGCTGGGTGGTGTGCAGGGTG  
 TTCAAGAAGAAGCACCAACCACAAGGAGGCCGGCGGCGGCGGCAAGCACGGCGGCGAC  
 GGCAGCGCGGCGCCAAGGCGGCGCACGCTTACTCCTCCAGCGACGACGCGCTCGACCAG  
 ATCCTGCAGTACATGGGCAGGTCGTGCAAGCAGGAGCACGAGCTCCCCTCGCCGAGGCC  
 AGCGGCGGCGGCGGCGCGGCGCAGGGAGCAGGCCGGCGTCGAGGTACCTCCGGCCAATC  
 GACACCGTGCTCGGCGGCCATGGCTTCATGAAGCTGCCGCCGCTCGAGAGCCCGTCGGCC  
 GCCACGGCGCTCTCCTCCACTCCGAGCACCGGCGGCGACGCGGCCTCCTCGGCCGCCGCC  
 GCCGCCGCCGACCACCTGCTGCTCCACCACCACCACCGCACGACTGGGCCATGATGGAC  
 CGCTCGTCGCGTCGCACCTCAACGGCGCCAACCTCCGACGCGCCCGACGACCAGCTCTGC  
 TTCGACGCCGCCGACGACGACGGCCTCGCTACTACTCCGCCGCCGCCACGAGGCTGCTC  
 GGCGGTGCCAACGCCGGCACCGACGACGACCTGTGGAGCTTCGCGCGGTGCGCTGCGCCG  
 CCACCGCCGCCGCCGCCGCGCTCGTCGGCCACGCCAGAGCGTCTCAGCCACGTGGCACTG  
 TAA

## Protein

### >ONAC029

MSISVNGQSCVPPGFRFHPTEEEELNYYLRKKVASEQIDLDVIRDVDLNKLEPWDIQERC  
 KIGSGPQNDWYFFSHKDKKYPTGTRTNRATAAGFWKATGRDKAIYNAVHRIGMRKTLVFY  
 KGRAPHGQKSDWIMHEYRLDDPATDTAAATPTVTSAAAAAAMAAAADGGQEDGWVVCRV  
 FKKKHHEKAGGGGKGHGGDSAGAKAAHAYSSDDALDQILQYMGRSCKQEHLPSPQA  
 SGGGGAGAGSRPASRYLRPIDTVLGHHGFMKLPPLESPSAATALSSTPSTGGDAASSAAA

AAADHLLLHHHRTDWAMMDRLVASHLNGANS DAPDDQLCFDAADDDGLAYYSAAATRL  
GGANAGTDDDLWSFARSAAPPPPPPPSSATPERLSHVAL\*

#### Gene Structure

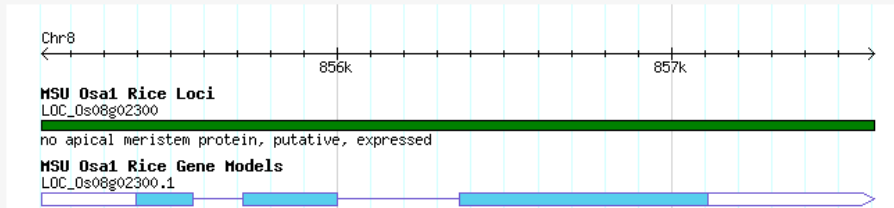

#### LOC\_Os01g23710 (ONAC030) sequence information

**Genomic sequence length:** 3028 nucleotides

**CDS length:** 1383 nucleotides

**Protein length:** 460 amino acids

Genomic Sequence

>ONAC030

CAAGAGAAATTTAGGGGGGGCAAAGTAAGTGGGAAGAGAGAAGGGGGGCTATGGCCGTCG  
GGAGCCGTGAGGCTGGTGGCACACTCGACCAATCCCCCTCCTGCGCGGCGGCGGCCGAGG  
AGGGGAAGCTGTGCGCGAGTTCACGGCGGCGAAATCCGTCGCTAGAGGGAGGGGACTGAG  
CAGGTGGTCGAATCAGGGGAGCTCTGCGAGAAAAATCAGGAAGAAGGTCATACCGGCTCAA  
TCAGACGGCGAGCTCTCCGTCCTTCGCCGCCCGCTCGTCTGCTCTCCGGCTGGCTGTCATG  
TTGCATACCAAAATTGAAAATAGCAGCCGGTCTCTTACATCATATTTGCACCGTATTCCT  
ACTCTTACTCCCCTTCAATTTCCCCCCCCAAATTGAATTCGAATCAAACAGCCGCCCTCACG  
CCCTCCCCTCAAATATGCAGCCCTCGCCACGCCACGCCACGCGCGAGCGCCGCCGCCGCG  
ACTGATCACGGCTCGGCTAGCTCTCTATCTCGCTGACTAATTAATCCTCTCTCCTTCT  
CCTGGTTAACTACAACTCTGACCAACTAACTCGCCCGCCATGGCAGAACAACCACTAGGA  
GGAGGCGGCGGCGGCGGCGGCGGCGGATGGCAACAACAATGGGAAGTGAAGGGGAAGGAGAAG  
GTGGTGCCCGAGTACGGCAAGAACCAGGACGGCATGCCTGTGCGGCTGCTACTTCGTCCCC  
AAGGACCTGGAGCTCTTCGCCATCCTCAGGTGCAAGCTCGTCCGCAGCCAGCTCCCCGGC  
GCCCTCAACAACGTCTTCGAGCATATCAGGATCCTCGAATTCACCCTGCCCTCCTCCAT  
GGTATGCCCCGCTTCGCCGCCGCTCTCTACCTCTCTTTTACCCTTCATCAATACCGT  
CCTCCTCCTCTTCTTCTTCTATGGTGATGACGTGTGTAGAGACGTACATCGGGAATGAGG  
AGGATGGGTACATCTACTTCTTTAGCAGGAGGCAGTTCACGACAAAGGCAAGGAACAAGA  
GGCGGCCGACACGGGTGGCGAAGGGCGGGACGTGGAAGGCGTCTGGTGGGAGCAAGACGT  
TGAGGAGCAAGAAGGTGGCGGTATCGACGTCGGCCAGAAGCTCACCATGGTGTCTACG  
AGCGTAGGTTGAGGGTGACCAGAACCCCATCAAGACCAATTGGGGCATGCACGAGTTTA  
CCAAGATCATTGATGGCTCAAAAAACCAAGTAGTCCTTGTGATCTAATTGCAATTTAAA  
CTTAAATCAATCTGCGTTACGTTGCAATCTACTTCCTCCATTATATTTTGTATTATAAGT  
CGTTTTGACATTTTTTTCAAGTTAAACTCATTTTCAACATCTACAATATAAAATCATTTT  
CATTAATGTAAACATTGAATATTGAATATAATTTTGATAATATGTTTGTTTTATGTAAA  
AGTATTATTATATTTTGGTTAAACTTAAAAAGTTTTACTTAAAAAAGAGAAAGTCAAGA  
TCGACTTGATATAATATAAAACAGAGCGAGTATATTTAAACATTTTGTATGTTCTGCT  
TGTAATTTACTAATTATGCTCAAGTGGATTGATCGATTTTTGTTGTTTGAATTTGAATTT

TGGATGCAATTTGTGCTAATTTGGGCGGATCAATTTCTGTGGATTTTGCCAAGCTTGAGG  
 ACCTTGCCGTGTACCGCTTGTACAAGATCAAAAGGAAGGAGGACGAAGAACCGGTGAACG  
 CTGCCGCCGCGGCGTCGAGCACGGACGAGCCCTCCACGTCGTCGGCACTGTCACCTCCTA  
 CGCCACCGCGGCCATTGCCGGACATGGCCGGACCATCATCAGCAACGCCGCTACTGCCAC  
 TGCAATTGCCGGACATGACCGGACCGTCGTCATCAACGCCGCTACTGCCACTGCAATTGC  
 TGGGCTTGGCCGGATCGTCGTCGGCGATGTCGCTACCACTGCCACTGCAATTGCCGGGCC  
 TGGCCGGATCGTCGTCGCGATGTCGCTGCCTGCACAGCAGATGCCGGGCATGGCCGGGT  
 CGTCGTCGGCGATGCCGCTGCCACTATCATTGCCGGGCCCTGGCTGGAGGGATGATGTCCA  
 TGGCGGACCAGGCGAACATGGCCCTCGACGTCGCAGGCGTCTACACCGTCGTCGGAGCTCC  
 TGCAAGACTGGTACGACGAGTTCGAGATCACGTACGGCGCCGTGGCGCCGCCGTCTCCTA  
 GCACGATCAGCTGGGAGGAGCCGAGAGCTCGCCGACGGGGTGGTGGCCGTCACCGAACG  
 GCGAGCCTGTGCAGCACGACGGCTACCTCGGGATGGCGGCGAATCCAACGTCGTACATGC  
 TGGAACACCCGTTGCCACCGCGGCGATCCCGCCGGAACCGATGACGCCGCCGACGAGCT  
 CACCGGCGCCACCACCAGCCGTCGACAACCACCACCGGCTCTCGCCTCCGCATGACGCCG  
 CCGGCAGCAACTACAACCACCCGGAGCTCGCCGGCTACAACGGCGGCGTCCAGGCGCAGC  
 ACGAGCATCAGCATCAACCGCAGGAGCCGAGCCAGCGTTGCTTGTGGATGGCGAGGACG  
 GCTACGGCGCCATAGCCGACGGCGACGGCGACACACAGCTGGGCGTCGCGGAGCTTGACA  
 CCGAACGAATAGCCGAAATGGTAAACCATATCATGGATGGCGAATTCGAGTTCAAATTCG  
 AGGACAACACCGTCCTTAAGTACAACGAAGTCTTCCGGACGACGACAAGGTGGTGGCGG  
 CGCCGATGATGATCGACGGCGGTGGAGACGGCGATGGCGCGGATGGAGGTGATGGAGGCG  
 ACCCATTCGATAATTAGGGCCCTGTTTCAAAAACCGCTGGAATTTCCATTTTCCCTGGCT  
 ATAAATTATTTATCTACAAATTTTACTCCATTTTGTAAAGTTAATGTTTCATATTTACTAT  
 TTGCTCCATGTTTTAGTTTCGTTTCAGACCTTTGGTAATTTTACTACTTCACTAGTAGTT  
 CTAGTTCCATGCGAGGCTGCAATTGTAT

# CDS

## >ONAC030

ATGGCAACAACAATGGGAAGTGGAAGGGGAAGGAGAAGGTGGTGCCCGAGTACGGCAAGA  
 ACCGGCACGGCATGCCTGTGCGGTGCTACTTCGTCCCAAGGACCTGGAGCTCTTCGCCA  
 TCCTCAGGTGCAAGCTCGTCCGCAGCCAGTCCCCGGCGCCCTCAACAACGTCTTCGAGC  
 ATATCAGGATCCTCGAATTCACCCTGCCCTCCTCCATGCTTGAGGACCTTGCCGTGTAC  
 CGCTTGTAACAAGATCAAAAGGAAGGAGGACGAAGAACCGGTGAACGCTGCCGCCGCGGCG  
 TCGAGCACGGACGAGCCCTCCACGTCGTCGGCACTGTCACCTCCTACGCCACCGCGGCCA  
 TTGCCGGACATGGCCGGACCATCATCAGCAACGCCGCTACTGCCACTGCAATTGCCGGAC  
 ATGACCGGACCGTCGTCATCAACGCCGCTACTGCCACTGCAATTGCTGGGCTTGGCCGGA  
 TCGTCGTCGGCGATGTCGCTACCACTGCCACTGCAATTGCCGGGCCCTGGCCGGATCGTCG  
 TCTGCGATGTCGCTGCCTGCACAGCAGATGCCGGGCATGGCCGGGTGTCGTCGCGCGATG  
 CCGCTGCCACTATCATTGCCGGGCCCTGGCTGGAGGGATGATGTCCATGGCGGACCAGGCG  
 AACATGGCCTCGACGTCGCAGGCGTCTACACCGTCGTCGGAGCTCCTGCAAGACTGGTAC  
 GACGAGTTCGAGATCACGTACGGCGCCGTGGCGCCGCCGTCTCCTAGCACGATCAGCTGG  
 GAGGAGCCGAGAGCTCGCCGACGGGGTGGTGGCCGTCACCGAACGGCGAGCCTGTGCAG  
 CACGACGGCTACCTCGGGATGGCGGCGAATCCAACGTCGTACATGCTGGAACACCCGTTG  
 CCCACCGCGGCGATCCCGCCGGAACCGATGACGCCGCCGACGAGCTACCGGCGCCACCA  
 CCAGCCGTCGACAACCACCACCGGCTCTCGCCTCCGCATGACGCCGCCGCGCAGCAACTAC  
 AACCACCCGGAGCTCGCCGGCTACAACGGCGGCGTCCAGGCGCAGCACGAGCATCAGCAT

CAACCGCAGGAGCCGACGCCAGCGTTGCTTGTGGATGGCGAGGACGGCTACGGCGCCATA  
 GCCGACGGCGACGGCGACACACAGCTGGGCGTCGCGGAGCTTGACACCGAACGAATAGCC  
 GAAATGGTAAACCATATCATGGATGGCGAATTCGAGTTCAAATTCGAGGACAACACCGTC  
 CTTAAGTACAACGAAGTCTTTCCGGACGACGACAAGGTGGTGGCGGCGCCGATGATGATC  
 GACGGCGGTGGAGACGGCGATGGCGCGGATGGAGGTGATGGAGGCGACCCATTCGATAAT  
 TAG

#### Protein

>ONAC030

MATTMGSGRGRRRWCPSTARTGTACLSAATSSPRTWSSSPSSGASSSAASSPAPSTTSSS  
 ISGSSNSTLPSSMLEDLAVYRLYKIKRKEDEEPVNAAAAASSTDEPSTSSALSPPTPPRP  
 LPDMAGPSSATPLLPLQLPDMTGPPSSSTPLLPLQLLGLAGSSSAMSLLPLQLPGLAGSS  
 SAMSLPAQQMPGMAGSSSAMPLPLSLPGLAGGMMSMADQANMASTSQASTPSSELLQDWY  
 DEFEITYGAVAPPSPSTISWEEPQSSPTGWWPSPNGEPVQHDGYLGMAANPTSYLEHPL  
 PTAAIPPEPMTPTTSSPAPPPAVDNHHRLSPPHDAAGSNYNHPELAGYNGGVQAQHEHQH  
 QPQEPQALLVDGEDGYGAIADGDGDTQLGVAELDTERIAEMVNHIMDGEFEFKFEDNTV  
 LKYNEVFPDDDKVVAAPMMIDGGGDGDGADGGDGGDPFDN\*

#### Gene Structure

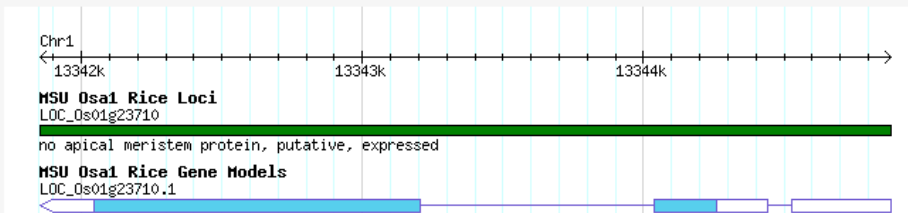

#### LOC\_Os08g01330 (ONAC031) sequence information

**Genomic sequence length:** 2039 nucleotides

**CDS length:** 975 nucleotides

**Protein length:** 324 amino acids

#### Genomic Sequence

>ONAC031

TGTCTGTCCTATTTCTAGGAGCTTTTCCAGCCTTGGACCCATCCAGATGCGCTTGCACTT  
 GCACTTGTCATGCAGTTCATTGCTCTAGCTATAGGCTATAGCTACTATACACTCATGAGAA  
 TCTGAGATTGGGCTGAAAATTGATGAGCATCGATCTGAAGAAGACATATATATAGCTGAT  
 GATGATATAGCTTTTCTGCATATGCTTGTGTTTATCTGCAGCCAATCGATCGAGGCATA  
 GAGAGTCACCAGGCAATCAAATTTCCAACCATCCATCAGCTAGATATATATACAGCAAAGA  
 TCACGATACTCCTAGCTAGCTAGCTAGAAGAATTGATCGGTCGATCGGAGGAAATAGCAA  
 TGGATCGGCATGAGGAGGAGGAGGAGAGTCTCCATGTGTGCCGCGGGGTTTCAGGTTTC  
 ACCCGACGGAGGAGGAGCTGGTGGGCTACTACCTCGCCAGGAAGGTGGCCTCCCAGAAGA  
 TCGATCTCGACATCATCCAGGAGCTCGATCTCTACAGGATCGAGCCATGGGATCTGCAAG  
 GTACGTACTGATCCATTACATTAATAAACCATGCATTCTATTCATGCATAATTAATATC  
 AATTCAGCAATTAATTTGGGAACTGAACGATCGATGATTCTGATGAATTATATATATGTG

GCAGAGCGTTGCAAGTACGGTGGGCATGGCGCGGATGAGCAGACGGAGTGGTACTTCTTC  
 AGCTACAAGGACCGCAAGTACCCAGCGGGACGAGGACCAACCGCGCCACGGCGGCGGGC  
 TTCTGGAAGGCCACCGGCCGACAAAGCCGGTGCTCTCGTCGCCGTCGACGAGGGTGATC  
 GGGATGAGGAAGACGCTGGTGTCTACAAGGGTCGCGCCCCAACGGCCGGAAGACCGAC  
 TGGATCATCCACGAGTACCGCCTCCAATCAAACGAACACGCCCCTACTCAGGCATGCATT  
 GCAACCACCTATTCCATTCCATCTTAATTTTTTACTTCTTTACTTAATTATCTGTCCTAC  
 TATATATGTTAATTCATGGATATTAATATGGAATATGGATGCAGGAGGAAGGTTGGGTGG  
 TTTGCCGCGCGTTTCAGAAAGCCGATGCCCAACCAGCAGCAGCACAGGCTGTCCTACGGCT  
 GCATCCCCGGCAGCTACGGCGCCGGAGCCTACGCCGCCGTCGCCGACAACACTACAGCTTGC  
 TGCTGCACCACGACAACCCCTAGCTTCGCCGGGGCGGCCATTGATGAGCGCCGCTGCCTCAG  
 CTCTCTTCGCCAACAACAATAACAGCGTCGTCGACCACAGCAACATTCTGAGTTCAG  
 AGTCCAAGCTTCACTTCTCCGACATGATGCCGCCTCTGGAGAGCCCCACCATCGTCGACG  
 GCGAGGGCTACGTCTCGCAGGCTAGCAGCTGCGTCGACGTCGATCAGCAAGCCGGCATCG  
 TCGACTGGAACCTGCTCACCAGCTTGCTGCCGCCGCCGGCGCATCAGCTCTTCCACCACC  
 TGCTTCCGCTTCTAGCTCCAAGAACAGCAACAACATTTCTTCGTCAGGCTTCATCGATG  
 ACCGAGACTGATCGATCGATCCAGATCGATTATTATCAATTGACAATTCATTCATCATAT  
 ATATGCATGAATTCTTACAAATACGCACAATTAACGATCGAGTGTACTATTAATTAGTT  
 GATTACTCCGTCTCCATGATGTATACATTAATTTGACCACTGGCCATCATCAGGCCATCT  
 GCATGCTTACTATCTAGCTTATGTCAGTACACGGTTGTTAGTTCATTCTTAATTAATTAG  
 CTACTAGTGTCAGTGTGTGTATCTATCGGTTGTTTCGCTTTTTGACCTCATTGCTGAGAGA  
 GGTGTTGTAAGTATGATGATTAAAGTTAGCTAGCATTTAATTAGGTGCTATATATACACAT  
 ATATATGCACTATCACTATATACATCATATATATGTATACATATATCGTTGTCTGCTTAA  
 TGTGTACACCACCTCTCTGCAGTATATATAGTATTGATCAATTAATTTGTATATATATA

# CDS

## >ONAC031

ATGGATCGGCATGAGGAGGAGGCAGGAGAGTCTCCATGTGTGCCGCCGGGTTTCAGGTTT  
 CACCCGACGGAGGAGGAGCTGGTGGGCTACTACCTCGCCAGGAAGGTGGCCTCCCAGAAG  
 ATCGATCTCGACATCATCCAGGAGCTCGATCTCTACAGGATCGAGCCATGGGATCTGCAA  
 GAGCGTTGCAAGTACGGTGGGCATGGCGGCGATGAGCAGACGGAGTGGTACTTCTTCAGC  
 TACAAGGACCGCAAGTACCCAGCGGGACGAGGACCAACCGCGCCACGGCGGCGGGCTTC  
 TGGAAGGCCACCGCCGCGACAAGCCGGTGCTCTCGTCGCCGTCGACGAGGGTGATCGGG  
 ATGAGGAAGACGCTGGTGTCTACAAGGGTCGCGCCCCAACGGCCGGAAGACCGACTGG  
 ATCATCCACGAGTACCGCCTCCAATCAAACGAACACGCCCCTACTCAGGAGGAAGGTTGG  
 GTGGTTTGCCGCGCGTTTCAGAAAGCCGATGCCCAACCAGCAGCAGCACAGGCTGTCCTAC  
 GGCTGCATCCCCGGCAGCTACGGCGCCGGAGCCTACGCCGCCGTCGCCGACAACACTACAGC  
 TTGCTGCTGCACCACGACAACCCCTAGCTTCGCCGGGGCGGCCATTGATGAGCGCCGCTGCC  
 TCAGCTCTCTTCGCCAACAACAATAACAGCGTCGTCGACCACAGCAACATTCTGAGT  
 TCAGAGTCCAAGCTTCACTTCTCCGACATGATGCCGCCTCTGGAGAGCCCCACCATCGTC  
 GACGGCGAGGGCTACGTCTCGCAGGCTAGCAGCTGCGTCGACGTCGATCAGCAAGCCGGC  
 ATCGTCGACTGGAACCTGCTCACCAGCTTGCTGCCGCCGCCGGCGCATCAGCTCTTCCAC  
 CACCTGCCTTCCGCTTCTAGCTCCAAGAACAGCAACAACATTTCTTCGTCAGGCTTCATC  
 GATGACCGAGACTGA

## Protein

>ONAC031

MDRHEEEAGESPCVPPGFRFHPTEELVGYYLARKVASQKIDLDIIQELDLYRIEPWDLQ  
ERCKYGGHGGDEQTEWYFFSYKDRKYPSTRTNRATAAGFWKATGRDKPVLSSPSTRVIG  
MRKTLVFYKGRAPNGRKTDWI IHEYRLQSNEHAPTQEEGWVVCRAFKQKPMNPQQQHRLSY  
GCIPGSYGAGAYA AVPDNYSLLLHHDNPSFAGRPLMSAAASALFANNNNNSVVDHSNLS  
SESKLHFSDMMPPLESPTIVDGEYVSQASSCVDVDQQAGIVDWNLLTSLPPPAHQLFH  
HLPASASSKNSNNISSSGFIDDRD\*

## Gene Structure

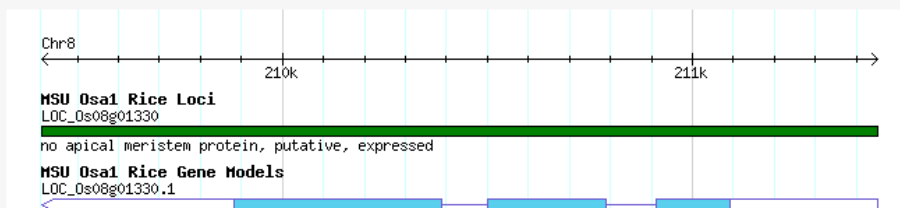

### LOC\_Os02g56600 (ONAC032) sequence information

**Genomic sequence length:** 3430 nucleotides

**CDS length:** 996 nucleotides

**Protein length:** 331 amino acids

## Genomic Sequence

## > ONAC032

CGCGCACGCGTCCCTCTCCCGCGTCCCTCCGCTCCTCCCGCGCGCTGCGTACGTGACAGCG  
CCATCTCCTGCTTGCAGCAGCTAGCAAGCAGCAGGCGCAACAGTATTACTGCAGATAGAG  
CTCTCGACCGATTGATCGATTGCTCACTGCCATATACATGATACTTACATACCGACGTAC  
TACACACAGAGATAGAGATCGGAGCTATAGCTATTGCTATTGCTAGCCATAGTATAGTAG  
TACCCTTTGCTCCTGCTGCTGCTTTGTTGCTTGCTTCCCTACACTTCTCTCTCAGCTG  
CTAGCTGCGCATATAATTATTCCTCGCCAAGCTATATATATTTGCCCTCCTGCCTTCTTC  
CCGAGCTCACACAATCGCCAACCTATACAGATATATGTGCTAGCTACTTCCAAGTTCCTA  
CCTATCAATTTCTCTCCTCCTCTTCTTCTTCTCTGTCATCAATCTGCAGCTTAATTCTTAG  
CTATGTACATATAGCTAGCTACCACTTCCAAAATACTCCACAGAGATCAATCACATATAG  
ATATAGCTAGATTGCTATAGACAGAGAGATCATCAAAGAAATTTAGCAGGTGATAGCCAC  
ATGGGGTTGAGGGACATCGAGCTGACGCTGCCTCCGGGGTTCCGGTTCTACCCGAGCGAC  
GAGGAGCTTGTCTGCCACTACCTTCATAACAAGGTGGTGAACCAGCATCGCTTCGCCGGA  
GTTGGAGGAGCCGCCGCCGCCGGCGGCGGCACCATGGTCGAGGTGGACCTCCACACCCAC  
GAGCCGTGGGAGCTACCAGGTAATCACTTACTCAATCAAAATTAATTAATTAATTACTAC  
TCCTTTTTTCCTCTCCCAAGCGACCCTCTCACTAGCTCCAAATCATTTATAGCTAATGT  
AATAGTCAATTATACATAATAGTTGCTTACTGTACTATTAATACCTGGTCCTACCTGTCAT  
ACACATATTACGTCTTAGAGTCCGTGCTACAGCTGACTATATACCTATAGTCTCCTGCTC  
TTCTCTCTCTTCCTTTATCTTTTTTAAAATATGTTTATAGCTGGCTTATAGCTTGCTATTG  
TACCTGCTCTTAGCCACGCGCCCTCTCTCTCCCCTCTTCTGTCATGATTATGGTTAATTAA  
ATCGTAGATGGTTCCCTCCGTTTCCATGGAATGATTAATTACGCACGCAACCACGCTTTAT  
TGGCTCCAATTAGGATTGTCGTTATTCTTCCCCCTTGTTAATTAACCAACAAGGCACGGG  
TCGATCCATCACGTATATCTCTGTGCGCGTATGTGCAACAGTGTGTTATATATTGCTTCT

GGTGCAAGCATACATATACCTATATCTATAATTTATTTCTTTATGACTGCAAGTGGGCTA  
TCTAAGCTCTAGCTATAGCTTGTCTCTTTGTCTCTTACGATTACGATCAAATTTCCCAT  
CAATTTTATACATGTTTAAAAATTTAACTTATTTTCATTCCATATCAACATTTTCTTCAGG  
ACATACTACTATATGTGTGCATAAACTCTCCTTAATTTCCCCGCGCGCCGGCCCATCCTA  
TTCTCAAAAAAAAAAAAACTGAGAACAATAAAAAATATACATAATATTGAAAAAGATTAAA  
TTAACCGGTTTGTTTAATTTCCCTCAATCAAATCGATCTGCTTTCCAAAATTTCTGAATA  
ATTAACGGTATTTCTTTACAAAACCTGCAGGAACAAGTTTAATCAGAATCATATCGAACAA  
TTAATCAAGTAGCTAGTATTATACCACATACTGAATATATTACGGTTGATCTCAGATTAG  
TCTAGATTAATCGAGTTGTGATGTGAAAAATTAATTATGGTGTGCATGCAGATGTGGCGA  
AGCTGAGCACGAACGAGTGGTACTTCTTCAGCTTCCGCGACCGCAAGTACGCGACGGGGC  
TCCGCACGAACCGCGCCACCAAGTCCGGCTACTGGAAGGCCACCGGCAAGGACCGCGTCA  
TCCACAACCCCAAGCTGCACGCCGCCGCCACCGCCGCGCCTCCATCGTCGGCATGCGCA  
AGACCTTGTCTTCTACCGCGGCCGCGCCCCAACGGCGTCAAAACCAACTGGGTCTATGC  
ACGAATTTTCGCATGAAAAACCTCACACCCCTCCCAAGGTTAGTCCTCACAATCCAATA  
ATTTCTCCAATAATTTCCCTTACTCCCTTTCATCCCTCAAATAAAATAAAATCCAGCACGGGTT  
ATGGTAAGACCTGTTTAGTCAAACCTGTTTTAAGTTTAACCAAGTTTGTAGAAAAATAAT  
AATATTTTAAACCCATGACAAATTTATTAAGAAAATTAATTCAATTATTGATTTGATAAA  
CTAATTTAGTATCATAAATATTACTATATTTATCTATAAAATTAGTTAAACTTGAAATAG  
TTTGACTTTATTAGAGTTAAACGTGTTATAACCTGAAGGAGTATAGTAGTAACCTTTTGG  
TTAATCAAGAGCTTGAGTTTGTGTGTTTAATTTTGCATATGTGTATGCAGGAGGATTGGG  
TGTTGTGCAGAGTGTCTACAAGAAGAAGGCGGAGACGGAGACGGAGTCGTCGTACAGCA  
TGGAGAACGAGCAGGAGGCGGTGATCGCCATGGCACGGAGCGCCGCGGCCATCAAGGCGG  
GTGGATGCTACTCCAACTCCTCCTCGTCTCACGACCCAGCCGCCGCCGCCATCACTCGC  
CCCCGCCATTCCCGGCGTCGCTCGCCGCCCTGCAGCAGCAGCCACCACTACAGCAGCCACC  
CACCGCCGCCCTCCCGATCACCAACCACCACCACCATGCCCGTCACCGGCGGCGGCGGCG  
GCTCCCTCAACGAGTTCATCCCCACCACCAGCATGGCGCTGTACAGCAGCATCTTCGACT  
TCAGCCAGCATCTCGACGGCGGCGCCGTGGCGGCGTCGGCGTCGGCGGCGGGATCGAGGG  
TCGACGGCGGCGAGCAGTGGGTCTGATGGAGCTAGGGCTCGAGGAGCACTACAATTACA  
ACGGCCTGATGCCGATGTGACGATCCACCATAGGTGTCGGTGCTGCTAGTGCTAGCTTAG  
CTAGCTTACACACTCCCAGTGCTAGCTAGCTGCAGTTCTGCAGCGCAGCTAGCTAGC  
GTTTATTATTAATAACCTCTTTTACCTCGATTGTTTGATCTGATTTGTTTCGTGGTGAT  
CGATTCCATCGATCAGCTTGTGCAGATTTTCGTTGATTGTGCATGCAAACATGCGCACCTG  
TGTATAGGGTATAGTGGTACGTCGTATAGCGCTGTTGCATTGTTTGGAGGTAAATTATAT  
ATCTTAGCCTTTAATTTGATTGAGATTGCAGTAGTAGCAGACGTCGTCATGCATGTGTAC  
ATATAATGTATGAATGATCAGTTTCTGTTGATGGGTGGATATATTAATGGAGTACTTAAT  
TTGGAACCT

CDS

# > ONAC032

ATGGGGTTGAGGGACATCGAGCTGACGCTGCCTCCGGGGTTCCGGTTCTACCCGAGCGAC  
GAGGAGCTTGTCTGCCACTACCTTCATAACAAGGTGGTGAACCAGCATCGCTTCGCCGGA  
GTTGGAGGAGCCGCCGCCGCCGGCGGGCACCATGGTCGAGGTGGACCTCCACACCCAC  
GAGCCGTGGGAGCTACCAGATGTGGCGAAGCTGAGCACGAACGAGTGGTACTTCTTCAGC  
TTCCGCGACCGCAAGTACGCGACGGGGCTCCGCACGAACCGCGCCACCAAGTCCGGCTAC  
TGGAAGGCCACCGGCAAGGACCGCGTCATCCACAACCCCAAGCTGCACGCCGCCGCCAC



CGCCGCGCCTCCATCGTCGGCATGCGCAAGACCCTTGTCTTCTACCGCGGCCGCGCCCC  
AACGGCGTCAAAAACCAACTGGGTCATGCACGAATTTTCGCATGGAACCCCTCACACCCCT  
CCCAAGGAGGATTGGGTGTTGTGCAGAGTGTCTACAAGAAGAAGGCGGAGACGGAGACG  
GAGTCGTCTACAGCATGGAGAACGAGCAGGAGGCGGTGATCGCCATGGCACGGAGCGCC  
GCGGCCATCAAGGCGGTGGATGCTACTCCAACTCCTCCTCGTCTCACGACCCAGCCGCC  
GCCGCCATCACTCGCCCCGCCATTCCCGGCGTCGCTCGCCGCTGCAGCAGCAGCCAC  
CACTACAGCAGCCACCCACCGCCGCTCCCGATCACCACCACCACCACCATGCCCGTC  
ACCGGCGGCGGCGGCTCCCTCAACGAGTTCATCCCCACCACCAGCATGGCGCTGTAC  
AGCAGCATCTTCGACTTCAGCCAGCATCTCGACGGCGGCGCCGTGGCGGCGTCGGCGTCG  
GCGGCGGGATCGAGGGTCGACGGCGGCGAGCAGTGCGGTCTGATGGAGCTAGGGCTCGAG  
GAGCACTACAATTACAACGGCCTGATGCCGATGTGA

Protein

#### > ONAC032

MGLRDIELTLPPGFRFYPSDEELVCHYLHNKVVNQHRFAGVGGAAAAGGTMVEVDLHTH  
EPWELPDVAKLSTNEWYFFSFRDRKYATGLRTNRATKSGYWKATGKDRV IHNPKLHAAAH  
RRASIVGMRKTLVFYRGRAPNGVKTNWVMHEFRMENPHTPPKEDWVLCRVFYKKAETET  
ESSYSMENEQEAVIAMARSAAIKAGGCYSNSSSHDPAAGHHSPPPFPASLAACSSSH  
HYSSHPPPPPDHHHHHMPVTGGGGSLNEFIPTTSMALYSSIFDFSQHLDDGGAASAS  
AAGSRVDGGEQCGLMELGLEEHYNYNGLMPM\*

#### Gene Structure

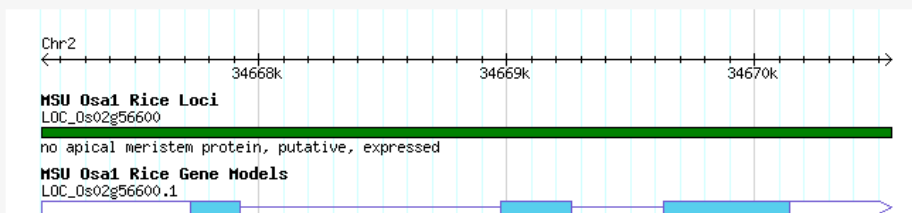

#### LOC\_Os01g28050 (ONAC033) sequence information

**Genomic sequence length:** 798 nucleotides

**CDS length:** 798 nucleotides

**Protein length:** 265 amino acids

Genomic Sequence

#### > ONAC033

ATGGCGATCTGCGTGCTGCAGCTGACCACTCCCGCGCATCCCCAAGCTCCGCGGCAACG  
CAACCAACAACCATCTGCTGGAGACCCAGCAAGGTCAAGGAGGAAGTAGAAGAAGACGGA  
ATGGTTGTCGATCCCCCGGACGACGCCAGCGAGGCGTCCGATAATCTGCGCGGACAGGT  
TTCCAGGACACGCCGACGGTGGGCGAGCTCGTCCTGCGCCACCTCCGCCCCGCTCTCCGC  
GGCTTCCACTGCGCCGACGGCGACGTCCCCGTCATCGGCGTCAGGGACGACCCCGCCGCC  
GCGGCGCCGCTGGACCTCGTCGCGCGGCACGGGGGCGCCGCCACAGGCGCCGCGGCGAG  
GCGTTCTACTTCGTGCGGCGGAGGCGCTGCCGCCGCCGAACGTGCGGCGGACCGTCGCC  
GAGGGAGGCGGAGGCGGTGGCGGTGCGGGCGGGCTGTGGAAGAAGAGCTGGACCGGGTCC

GGCAAGTCGGTGACCGACCTCGGCGTCGTCGTGCCGTGGAGCAAGACGTGCTACTGCTTC  
 TACCGGCGCGACGAGGGCGGCGCGGTGAGCACCTTCGGGGGAGGGTGGGTCTTGGCGGAG  
 TACGAGATCACGGAACCCGGTACGTACCGGCGCGCCGACGAGGAGGAAGACGACGACGAC  
 TACTGGGTACTTTGCCACGTCAGGAAGACGGCAAGCAAGAAGAGGAAGCGGAATCGCTGC  
 GATGAGGCCGTGGCTGCACGGGCTGTAGCCGGTACGGAGTCTAAGTCGTATCTCCTATGT  
 GGGCTGACAGCGAATTGA

CDS

> **ONAC033**

ATGGCGATCTGCGTGCTGCAGCTGACCACTCCCGCGCATCCCCAAGCTCCGCGGCAACG  
 CAACCAACAACCATCTGCTGGAGACCCAGCAAGGTCAAGGAGGAAGTAGAAGAAGACGGA  
 ATGGTTGTCGATCCCCCGGACGACGCCAGCGAGGCGTCCGATAATCTGCGCGCGACAGGT  
 TTCCAGGACACGCCGACGGTGGGCGAGCTCGTCCTGCGCCACCTCCGCCCCGCTCTCCGC  
 GGCTTCCACTGCGCCGACGGCGACGTCCCCGTCATCGGCGTCAGGGACGACCCCGCCGCC  
 GCGGCGCCGCTGGACCTCGTCGCGCGGCACGGGGGCGCCGCCGACAGGCGCCGCGGCGAG  
 GCGTTCTACTTCGTGCGGCGGAGGCGCTGCCCGCGCCGAACGTGCGGCGGACCGTCGCC  
 GAGGGAGGCGGAGGCGGTGGCGGTGCGGGCGGGCTGTGGAAGAAGAGCTGGACCGGTCC  
 GGCAAGTCGGTGACCGACCTCGGCGTCGTCGTGCCGTGGAGCAAGACGTGCTACTGCTTC  
 TACCGGCGCGACGAGGGCGGCGCGGTGAGCACCTTCGGGGGAGGGTGGGTCTTGGCGGAG  
 TACGAGATCACGGAACCCGGTACGTACCGGCGCGCCGACGAGGAGGAAGACGACGACGAC  
 TACTGGGTACTTTGCCACGTCAGGAAGACGGCAAGCAAGAAGAGGAAGCGGAATCGCTGC  
 GATGAGGCCGTGGCTGCACGGGCTGTAGCCGGTACGGAGTCTAAGTCGTATCTCCTATGT  
 GGGCTGACAGCGAATTGA

Protein

> **ONAC033**

MAICAAAADHSRASPSAATQPTTICWRPSKVKEEVEEDGMVVDPPDDASEASDNLRATG  
 FQDTPTVGELVLRHLRPRLRGFHCADGDVPVIGVRDDPAAAAPLDLVARHGGAADRRRGE  
 AFYFVRRRRRCRRPNVRRVAEGGGGGGAGGLWKKSWTSGSKSVTDLGVVVPWSKTCYCF  
 YRRDEGGRLSTFGGGWVLAEYEITEPGTYRRADEEEDDDDYWVLCHVRKTASKKRKRNR  
 DEAVAAARAVAGTESKSYLLCGLTAN\*

**Gene Structure**

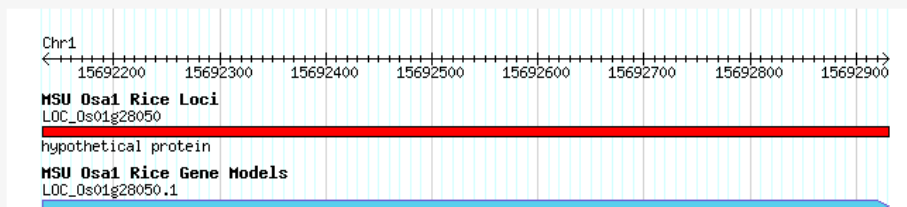

**LOC\_Os01g59640 (ONAC035) sequence information**

**Genomic sequence length:** 1892 nucleotides

**CDS length:** 1206 nucleotides

**Protein length:** 401 amino acids

Genomic Sequence

> **ONAC035**

ATGGCTGAATCCTCCGAATCTGCGTGGCCGCAGCAGAGTCAGCAGCTGCAGATTAGCAGC  
 ACAATGCCGGCCGGTTCTGTCATGGCCGGAGGAGGAGAATCTCGAGAATCTCGAGCAGCCG  
 CTTCCCCTGCTGATGCCATCGTCGGAGGATCATCGCGAGCAGCAGCTTGTTCCCGTTCCA  
 TGGCTGCAGCAGGATCAGGATCAGGAGTGGCATGAGCAGGAGCAGTTTCTTCCCCTCAA  
 AATCAGAATCAGGAGCAGCTTCAGGATCAGCAACCTCTGCAGGATCAGGAGGAGACGCGT  
 AGATATTTGGGCGTGCCCGGAATCCGGTTCGTGCCGTCCGATATAGAACTTATCCTTGAC  
 TTCTCCGGCCGAACTACGCGGCGAGCAGCTGCCAGCTACAGCTACATGCATGTCTGC  
 GACGTCTACTCCGACCATCTAAAGAACTTAGTAGGTTTGCTGTGTTCAATTTGTACATT  
 TTTTCTTTGTTAACATATATATGTATATCACACTATATTAACATATCACTATTTTGTAGT  
 ATTAACATAACTATGATATTTTAGTTTTGTGTTTTTCTTAACTGTGCATCTTTATCTGT  
 TCTTTGTTAATATATATCACACTATATTAACATATCACATTATTATTTTGTGTTAATTA  
 ACCTGCTATATATCACACTATTTTTCGAGTTTGCTGCTTAATTTTATGCACCTTCTCTA  
 TTCTTGTTAGCATATTTTACACTGTGTTAACACATCACACTATTTCTGTTTATTAACAT  
 ATCACATTATTTTGTAGTGTAACTATCACACTATTTTTTTTAAGTTTGCCGCTTAATT  
 TATGCATCTTTCCATGTTCTTGTTAACATATATCACACTTTATTAACACATCACACTTT  
 TTTTTTGTCTAGCGAGTAAGCTGGGTCCCAGCCGCAAGGAACTGGTACATGTTTTTC  
 ACCTAGAAACCGGAAATACAACAAAGGCAAAAGGCCTAGCCGAAGCACCGGTCAATTGGG  
 TTTTTGGAAGTCGACTACCAAGAACGAGGCCGTCTTGACGCCCTCAGCGATAACATGTT  
 GATTGGATAACAAGGCATGCCTCACCTATCACGAATACGATGAGAGCATGCCGACGCCAAA  
 GTTGAAGAAAGAGAACGCGATCAAGACGCCGTGGAAGATGTGGGAGTTCGTGTGTTCCAA  
 CTCCAACCGGCCGTTCGACGCGGAGGAGGCCCATGCGGGTTAGCTACTATCATATCAA  
 TCGCATGACTATATATATATTTTCTATTTAGAATAAGCTTATAGAATCACTTTTAAAACA  
 AATGTACCCACATTTGTATTTTATGAACTGATGAGCAGCCAGAGGTTTAAAAAGTTTGA  
 TAAAATAGTTGTTGTGACGATTAGTAGGAGTATAGTAATTCTACTGTGTGTTTTTTTTTT  
 CTTTTTCTCTGTTTATAAATAGCTCAACGACTGGGTGTTGTGCAAAGTTACCAACAAGG  
 ACAACAAAGTTACCAACCAAGAAAGTTCAAACCACAACGCAGCAAGAAGCCGAAGAAGCCGA  
 AGAAGCTACAGCAGGAGGAACAGCCACAAAACCAAGGCATTGTGATCAGGCAGCCGTCAG  
 AATCCGGCTCGGCCCTCTCGTCGCACCAAGAAATCCCTGGCTCTTCTCTTCCCGGAGCCG  
 GAGGAGACGCCGCGGCCGCGGCGGCGGCGGCGGTGGTGGATCCTATGCCATTGC  
 ATATGATTCTCCTTCTTCATGGAATTATTTTCAGCACGGGAGTTACTGCAGATGGTATTG  
 TTATGGATGACAGTACGGGAGTCGATTCATATGGTTGTGTAGATGGTGCTGGTGCTCTTA  
 ATTTCCAGAGGAACATCTTCTACCACCGTTAA

CDS

> **ONAC035**

ATGGCTGAATCCTCCGAATCTGCGTGGCCGCAGCAGAGTCAGCAGCTGCAGATTAGCAGC  
 ACAATGCCGGCCGGTTCTGTCATGGCCGGAGGAGGAGAATCTCGAGAATCTCGAGCAGCCG  
 CTTCCCCTGCTGATGCCATCGTCGGAGGATCATCGCGAGCAGCAGCTTGTTCCCGTTCCA  
 TGGCTGCAGCAGGATCAGGATCAGGAGTGGCATGAGCAGGAGCAGTTTCTTCCCCTCAA  
 AATCAGAATCAGGAGCAGCTTCAGGATCAGCAACCTCTGCAGGATCAGGAGGAGACGCGT  
 AGATATTTGGGCGTGCCCGGAATCCGGTTCGTGCCGTCCGATATAGAACTTATCCTTGAC

TTCCTCCGGCCGAAACTACGCGGCGAGCAGCTGCCCAGCTACAGCTACATGCATGTCTGC  
 GACGTCTACTCCGACCATCCTAAAGAACTTACGAGTAAGCTGGGTCCCAGCCGCGAAGGA  
 AACTGGTACATGTTTTACCTAGAAAACCGGAAATACAACAAAGGCAAAAGGCCTAGCCGA  
 AGCACCGGTCAATTGGGTTTTTGGAAAGTCGACTACCAAGAACGAGGCCGTCCTTGACGCC  
 CTCAGCGATAACATGTTGATTGGATACAAGGCATGCCTCACCTATCACGAATACGATGAG  
 AGCATGCCGACGCCAAAGTTGAAGAAAGAGAACGCGATCAAGACGCCGTGGAAGATGTGG  
 GAGTTCGTGTGTTCCAACCTCCAACCGGCCGTTTCGACGCGGAGGAGGCCCATGCGGCTC  
 AACGACTGGGTGTTGTGCAAAAGTTACCAACAAGGACAACAAAGTTACCACCAAGAAGTTC  
 AAACCACAACGCAGCAAGAAGCCGAAGAAGCCGAAGAAGCTACAGCAGGAGGAACAGCCA  
 CAAAACCAAGGCATTGTGATCAGGCAGCCGTCAGAATCCGGCTCGGCCTCCTCGTCGCAC  
 CAAGAAATCCCTGGCTCTTCTTCTCCCGGAGCCGGAGGAGACGCCGCGGCCGCGCGGCG  
 ACGGCGGCGGCGGTGGTGGATCCTATGCCATTGCATATGATTCCTCCTTCTTCATGGAAT  
 TATTTGAGCAGCGGGAGTTACTGCAGATGGTATTGTTATGGATGACAGTACGGGAGTCGAT  
 TCATATGGTTGTGTAGATGGTGCTGGTGCTCTTAATTTCCAGAGGAACATCTTCTACCAC  
 CGTTAA

#### Protein

#### > ONAC035

MAESSESAPWQQSQQLQISSTMPAGSAWPPEENLENLEQLPLLLMPSSSEHREQLVPVP  
 WLQDQDQEWHEQEQLPLKNQNEQLQDQQLQDQEETRRYLGVPGIRFVPSDIELILD  
 FLRPKLARGEQLPSYSYMHVCDVYSDHPKELTSKLGPSREGNWYMFSPRNRKYNKGKRPSR  
 STGQLGFWKSTTKNEAVLDALSDNMLIGYKACLTIEYDESMPTPKLKKENAIKTPWKMW  
 EFVCSNSNRPFDAEEEPMLNDWVLCKVTNKDNKVTTKKFKPQRSKKPKPKKLQEEQP  
 QNQGIVIRQPSESGSASSSHQEIPGSSLPGAGGDAAAAAATAAAVVDPMPLHMIPPSSWN  
 YFSTGVTADGIVMDDSTGVDSYGCVDGAGALNFQRNIFYHR\*

#### Gene Structure

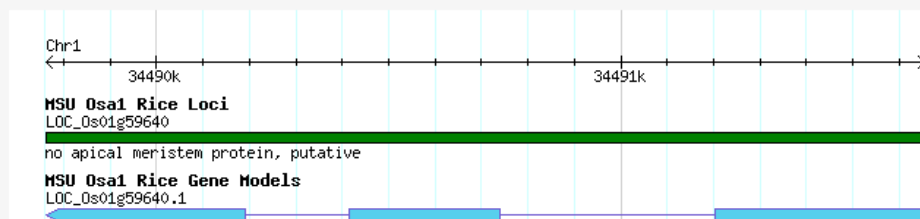

#### LOC\_Os05g35170 (ONAC036) sequence information

**Genomic sequence length:** 4122 nucleotides

**CDS length:** 1350 nucleotides

**Protein length:** 449 amino acids

#### Genomic Sequence

#### > ONAC036

GCGGTTGCTTCTCCGAAAAATCCTCATCCTCTCCATTGACCAGACGGCGGCGCAGGCGCA  
 GGCGCTCACCTCCCTCCTCCTCCGCGGCATCCCCAATCGACCAGCTGGCTCCCCTGCCTC

CTCCGCGTAAGTTCACCCCGATCTCTCTCTCGAATCCCTTGCTCCGATCTCCAATCCGCG  
CTGGTTCTGTGCGGGTTTTTGGATTAGGGCGCGGTTAGCGTCGGGGGATGTCTTGGGGTT  
GGGGGGTAGGGTTGGTGGCTATTTGGGGGTTTGGTTTCGACGATTCGGGGATGGGGGTTGA  
TGGATTGTGTGGATCGGATTGGTCTCGTCGATAGGTTTCGGGGTCGCGGATCAGGGTGGT  
GGATGTGATGCAGGTTTTGTGTGAGATCGATTTGATCGTCGATTTTGGGGCCTAATTTAG  
GATTGGATTGCTTGGAGAGCATTGGTTTGTGCAGCGTTGACTTAGGTACGGTTTTTTTGG  
TTAGGTTGATTGGGGGTTCCGTTTGATCGTTGACCTGTGGTTTAGGACAGATCTGGAATT  
CTCCAGGTTCAATTGAAGGGAAGATTATCTCTTTTGGGGGGATTTCACCGGGAAATATCA  
ATCAACCAAAAACTAGTTGTGATTTCCCTGTTGTAACATACGTATTCGATATTCAGTTTT  
CCTTCTATTTTCGGTTTCCCTCCGAAAAATTAAAGTAGTAGCTGCCTATTTTCTTTGTTTGA  
CATGCTCATGAGGGTTTATCAAGGGTTTAGAATGTCATATTTTAGGAAAACCTGTACCTT  
CTGCTTTATATGACCATTTCATGTTTCTTATGTCTGTCTTATTTTACTTGCAGGATTTTGA  
TCCTAATCACCCATGTCTGTGAAGTCAGCGAGGAATATCCTTATTTCCCTCTCCTGCTAC  
TTCTGGTTCATATATTGCATAAAATTCCGAGATTTCACTTGATACAAGTGGATCACCTGG  
AGTTTTGTGCTAATACTTCCATCATGTGAATCAGTTGTAGTTAGCATAATTGGCAAGAC  
TCAAGTTTTCTCTCATCTGGGTTTCAGAAACATTTGTGCGTTGAGTGCTCGATCTAAACTC  
TGCTTGAGTCTTGCCGAAGATTGTTTCTCAACAATCACGTCTTCTGTTCTCTCTGAGGTT  
GGACCAATCTCCCTTTTGGTCTGATCAACCTCCTGATCTCCCTTAAGTGAACCGTCCTGC  
TGTGTTACGCAATACAATCTTCTGAAGTCCTCTCTTGTTCCTTCTGTGCTCAAACATCA  
AAAGCAGCTCTCTCCTAAGTTCTCTTGATTGTTTGTGCTCCTAAATTCGTGTGTTGAGC  
ACTCAAACATTTCCCTTACTGGTCAATCTTAGATCACTTGTGATTATTGGTATTGGCAT  
TATTTGGTGAAGCATTTCTGCTTGTACCTTAAACAAAGGTCTCTGTTGTCTTATTGGTGC  
TGAAGGCAAGATATACACTGCAGTGATGGCTCAAACCTGCTTGCCACCTGGCTTTTCGTTT  
TCATCCAACAGATGTTGAACTTGTTTCATACTATTTGAAAAGGAAGATTATGGGAAAGAA  
GCCTCTTATTCAAGCTATATCAGATGTTGAACTGTATAAATTTGCTCCCTGGGATCTTCC  
TGGAATTCCTAATTCTCATGTTATGATGTTTTTAGAACTTTAAATAAATGATAAAATA  
GTGGTCACGAAGACAATTTCTCAAGAAAAACATGTCATTTATTCTCAATTTTATGCACAA  
TTTTGCTCTAATTTGTATGCATCAATCTTCTGCAGCTCAATCCTGTCTCCAGAGCAGAGA  
TCTTGAATGGTTCTTCTTTTGGCCACGAGACAAGAAATATCCTAATGGGTCTAGGACAAA  
TCGTTCCACACCAAATGGTTACTGAAAAACAAGTGGGAAAGATAGAACGATTGAGCTTAA  
CTCTCGCATTGTTGGGTCAAAGAAAAACTGATTTTTCATGAAGGCAAAGCACCTAAAGG  
CAACAGGACTGATTGGGTGATGTACGAATACAAAATGGAAGACAATCAATTGGTCTCTGC  
TGGTTTCTCAAAGGTAATGCTATTTAGTATGCGTATTGCTTGTGCGAGTAAGCTCTCACAA  
CTACACTTAGCTTTATGTGATCAAGATTTAGTAATTCCTTATTTTATGTTTCATCGTTCTG  
TTATTATCTCCTTTTTATTATCTTTGGAAGTAAATTTGATTCTAAACCATTAGTAACAG  
AAGTGGAATATGGCTGGGCTAATAATGCTCTTTATGTGCGGTAGTTATCATTGAAGAAAT  
TTTAGAACTCCAGAAACAGATAAAAAACAATAGAATATTGATCCTTGTGCTGATTTATAG  
GGGCTAAAGTGCAAATTTGTGCTAGGCACCCTTTGTGTTTTGTTTTATTTTCTCACTCTTA  
TGATAGCCAATATTTTGCCTTTTTTGAAGCAGTTATCAACGATGAAGTACTTTTTTGA  
TTTTGATTTAGTTAAAAACAAAGCTATTATTGGTTTTATAACTCTTATGTATCCTATTTGG  
GATATTGTACTCAATAGTTCTTTTAATTAAACATTCAGGATGATTTTGTCTCTGCAAAA  
TTTTCAAGAAAAGTGGCCTTGGTCCAAGGATTGGGGAGCAATATGGGGCTCCATTTAATG  
AAGAAGAATGGGAGCATGCAGATGCTGAAATGTTTCCCTTGCTGCCAAATGTTGAACTT  
CTGTGTTTCCATTGCTGCCCTCTTCAGAGGTAGTAAATTCCTACTGATGATACACGTGTTT  
AGCCTTCTGTTGCTGCCAGAGCTATTGAGGAACTACCTGTGCAGCATTTACCTCATGTAT

GTGCTGGGAATGGATCAACATATCAAAATATTACTGTTACTGGTGAAAGTGCTCTCATGG  
 AACTGCCTTCCCAGCACTCTGTTGAATCTATTGGTGATGAGGTAGTTTCTGTGGACAACT  
 GTTCTAATGTGGTCAATAATGCAGACAGTCCTGTAATTGAGGGGCTTGTATTGGAGGAAC  
 TTTCTAGGTTTTTAAGTGATTCTCCTCATCATGGCAACCCTGTTGGGGAGGTAGATAGAG  
 CTTGTTCAATTATCAGATCTCCCTGTATTCCCTTTTATGCTTGGGCATATAAAAAATGTCTGA  
 TTTTCTCTGGGCTTATTATTTTATCTATTTATTTTGCAGCACTCTGGTCTCCCACCAAT  
 GTCTGAGGCTGAAGCTCATGCTTTTGAGGTTAGCACAAATGATCTGTACAATGAAATTGC  
 AGGGCTTGCTGAATTGGGTGTGCCAAATGGTGATGGATTTTCTCCGTCCAATGCTGGTGT  
 TACTGAACAACAGCCCACATACTTTGGAGTTCCTAACAGTGAAAATTATGTAAATATGGA  
 TGATATCTTTGCTCCAGACACAAGATTATCCTATGCATATCCTTTGCCAAACAACCAATT  
 TTGGCATTATCCCATGGATCAGTTCACATACAGTACTACTCTATCTGCTGCCTTTCCATC  
 TGGTGACTCGCGTCCAACATATGCGCATTGTTGATGATTTACCTGCTGCTGCTAATAACGG  
 TGGCTTTGCTTCAAAAACCCAGCATGCAGTTCCCACTGTCATAACTAAGTCCAGAACCCTT  
 CTAGAGGTACAGTTTCGTTTTTAAGTTGTTTGTTCAGGTATTAATTATTCGGGCTA  
 ATTTAGTTGCTGCTATTAAATCTTCAGGACTCTGATACTGATGACCTAGTGGGATTCCAT  
 ATGCTGGCAGTACTGCGCAACAGATGTGTCTTCATGGCCACCTGCTGCCGCTCCGAGCTA  
 AGCCAAACCTCGCTGAATCTTTCTCGTGGACTGTTGCTGGATTTACCAGTGCTCGAACTG  
 GTGGTCACTGCAAGCATTGTGAGGCCAACAAATGTACATTGTTTTGAAGGTTTGGCCTAGT  
 TCTCGATGGCGATGCTCTATGATCCGAACTTGTCTAGCCTGGCGCGCTACTGAGGATCAG  
 ATATTCGCTTTGTGTTACCTTATTTACTTGCTGCTGAATAAAGTTTGTATCAAACCTAG  
 TGTATATTGTGTTATGACTGCACTTAAACCTTATGTAAGTTTGCATGGTTTGGCCTACTA  
 TTTACTTGCTATTAATCTTCTCCTAAGTTCGTTGTTTTGGCA

CDS

> **ONAC036**

ATGGCTCAAACCTGCTTGCCACCTGGCTTTCGTTTTTCATCCAACAGATGTTGAACTTGTT  
 TCATACTATTTGAAAAGGAAGATTATGGGAAAGAAGCCTCTTATTCAAGCTATATCAGAT  
 GTTGAACCTGTATAAATTTGCTCCCTGGGATCTTCCTGCTCAATCCTGTCTCCAGAGCAGA  
 GATCTTGAATGGTCTTCTTTTGGCCACGAGACAAGAAATATCCTAATGGGTCTAGGACA  
 AATCGTTCCACACCAAATGGTTACTGAAAAACAAGTGGGAAAGATAGAACGATTGAGCTT  
 AACTCTCGCATTGTTGGGTCAAAGAAAAACTGATTTTTTCATGAAGGCAAAGCACCTAAA  
 GGCAACAGGACTGATTGGGTGATGTACGAATACAAAATGGAAGACAATCAATTGGTCTCT  
 GCTGGTTTCTCAAAGGATGATTTTGTCTCTGCAAAATTTTCAAGAAAAGTGGCCTTGGT  
 CCAAGGATTGGGGAGCAATATGGGGCTCCATTAAATGAAGAAGAATGGGAGCATGCAGAT  
 GCTGAAATGTTTCCCTTGCTGCCAAATGTTGAAACTTCTGTGTTTCCATTGCTGCCCTCT  
 TCAGAGGTAGTAAATTTACTGATGATACACGTGTTTACGCTTCTGTTGCTGCCAGAGCT  
 ATTGAGGAACTACCTGTGCAGCATTTACCTCATGTATGTGCTGGGAATGGATCAACATAT  
 CAAAATATTACTGTTACTGGTGAAGTGCTCTCATGGAAGTGCCTTCCCAGCACTCTGTT  
 GAATCTATTGGTGATGAGGTAGTTTCTGTGGACAACCTGTTCTAATGTGGTCAATAATGCA  
 GACAGTCTGTAAATTGAGGGGCTTGTATTGGAGGAACCTTTCTAGGTTTTTAAGTGATTCT  
 CCTCATCATGGCAACCCTGTTGGGGAGCACTCTGGTCTCCCACCAATGTCTGAGGCTGAA  
 GCTCATGCTTTTGAGGTTAGCACAAATGATCTGTACAATGAAATTGCAGGGCTTGCTGAA  
 TTGGGTGTGCCAAATGGTGATGGATTTTCTCCGTCCAATGCTGGTGTACTGAACAACAG  
 CCCACATACTTTGGAGTTCCTAACAGTGAAAATTATGTAAATATGGATGATATCTTTGCT  
 CCAGACACAAGATTATCCTATGCATATCCTTTGCCAAACAACCAATTTTGGCATTATCCC

ATGGATCAGTTCACATACAGTACTACTCTATCTGCTGCCTTTCCATCTGGTGA CTGCGT  
CCAACTATGCGCATTGTTGATGATTTACCTGCTGCTGCTAATAACGGTGGCTTTGCTTCA  
AAACCCAGCATGCAGTTCCCACTGTCATAA

Protein

> **ONAC036**

MAQTCLPPGFRFHPTDVELVSYYLKRKIMGKKPLIQAI SDVELYKFAPWDLPAQSCLQSR  
DLEWFFFCPRDKKYPNGSRTNRSTPNGYWKTS GDKRTIELNSRIVGSKKTLIFHEGKAPK  
GNRTDWVMEYKMEDNQ LVSAGFSKDDFVLCKIFKKSGLGPRIGE QYGAPFNEEEWEHAD  
AEMFPLLPNVETSVFP LLPSSSEVVNSTDDTRVQPSVAARAIEELPVQH LPHVCAGNGSTY  
QNITVTGESALMELPSQHSVESIGDEVVSVDNCSNVVNNADSPVIEGLVLEELSRFLTDS  
PHHGNPVGEHSLPPMSEAEAHAFEVSTNDLYNEIAGLAELGVPNGDGFSPSNAGVTEQQ  
PTYFGVPNSENENYVNMDDIFAPDTRLSYAYPLPNNQFWHYPM DQFTYSTTLSAAFPSGDSR  
PTMRIVDDLPA AANNNGGFASKPSMQFPLS\*

Gene Structure

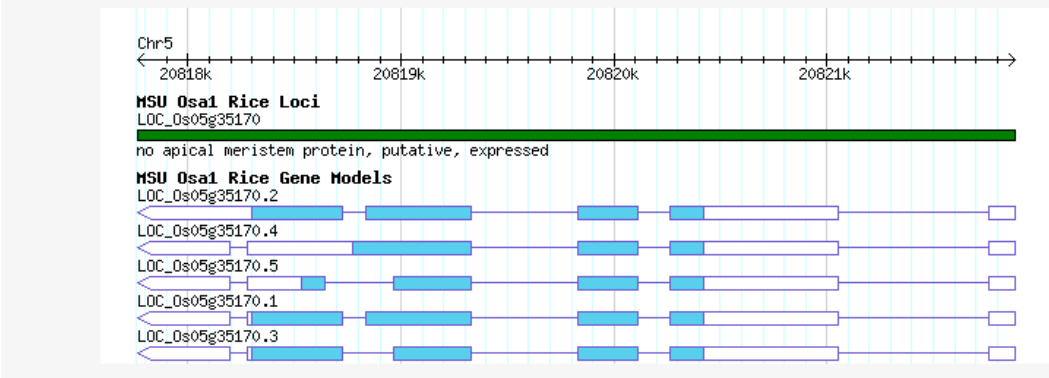

**LOC\_Os08g06140 (ONAC037) sequence information**

**Genomic sequence length:** 4434 nucleotides

**CDS length:** 2193 nucleotides

**Protein length:** 730 amino acids

Genomic Sequence

> **ONAC037**

GCGGTAAAGCCACTCGCTTTCTTCCCCACCACGTCTCCTCCTCTTCTCCTCCCCTAAAAT  
CCCCAATTCGACCAAACCTAGCCCCCCCCAAATCGCCTCACTCCACCACCCACGCTT  
CCTTCGCCGCTAAGTATATCCCTCCCGCGACCGCGAATCGGATCTTGAGAGTGAGAGAG  
AGGTTGGGGGAGGTGGATGAGAGGGCGGAGATGACGGTGATGGAGCTCAAGAAGCTGCCG  
CTCGGGTTCAGGTTCCACCCACCGACGAGGAGCTCGTCAGGCACTACCTCAAGGGGAAG  
ATCACGGGGCAGATCAGGAGCGAGGCCGATGTCATCCCCGAGATCGATGTCTGCAAGTGC  
GAGCCGTGGGATCTCCCTGGTGAGTTTTCTTCTCCTTCCTCTCTGCTTTAGTCCTCCTTT  
TGCTGCAGGGTTGGTTTGGATTTGCTTGCTTGGGGTTATTTGTGCTGTTTTTTTTTGTCT  
CGATCGGGTGTGGTTTGCAGCTGATTCCAGGTATGGAGAGCTTGGGGGTTGTGCTCGTTT  
GCGTGTTTTGCTTTTTTGGTTTTATTCGTTTTGAAGAAATCACTCTGGTTTGTCTTTTCTT  
GTTTGGGTTTTGTTTCTTGCTTTTTTTTGGTTTTTGGTTTTTATACCTGTAGCCGTGTGGTT

TTGGGGATTTTTTTTGGTTTGATCACTACTGGGGTTTCCCCATTTTTTGGCCATTCTTT  
 CAGTGATTCTTTTGTTTTTGTTTATGCTGCTTTATTGCTGGATCTCGGTGGTTTCTGGGC  
 GGGATTCTGATGAGCAGATTACTGCTGCTTGCTGTGGTTTGCATCTTTCTCCGTGAGGAA  
 TTTTTTCTCCCCATGGGGATGCTAGTTTGATGCGATTCCCTCGAACTCCGCTAAAAATGC  
 CTAAATCCTTTATTAAAAATGTGCCCGAGATGCTGTTTGGTGTGATGCGGTTCAAATCTTT  
 GACTTCGTTGATGCAAATTTTACTAATCGACCTGTCAAACCTCTGAGAAAGATTCCATTTCT  
 TGACGCGTGTTCCTCTTGATTTTGTGGCGGGTGCGTTCAGATAAGTCTCTGATCCGCTCC  
 GATGATCCGGAGTGGTTCTTCTTCGCGCCGAAGGATAGGAAGTATCCCAATGGGAGCAGG  
 TCGAACAGGGCGACGGAGGCCGGGTACTGGAAGGCCACCGGGAAGGACAGGGTGATCAGG  
 TCCAAGGGTGACAAGAAGAAGCAGCAAGTAATTGGCATGAAGAAGACGCTCGTGTTCAC  
 CGGGGGCGTGCGCCGAAGGGTGAGCGGACTGGGTGGATCATGCATGAGTACCGCACCACC  
 GAGCCGGAGTTTGAGTCCGGTGAGCAGGTATGCGATAGTGCTAGTACCTTGTTTTGTAGC  
 TTTCTTTGTAGGTTTATTTTCTCAGCAAGTTCATGATCAGTATGTCAAGATTTTGTAGCG  
 ACAATGTTGTTATATATAGGTATGCTCACAGTTCACAGCTCGGTTGTGAGTTTACAGCAA  
 ATGAGAATGTCAAATGAACACTGCAAATATCTTTTGGGAAAAAAGAAACATAATCATCT  
 GATGTTTCTGTTCTGGTATCTTAGTATTCGTATTTGTATTTTTCAGGGAGGTTACGTTCTC  
 TACCGGCTGTTCCGAAAGCAAGAGGAGAAAAATTGAGCGACCCAGTCCGGATGAAGTGGAT  
 AGAAGTGGATACTACCCACTCCTTCTCGTTCAACTCCTGATAACATGGAACCAATTGAA  
 GACGGAAATACACCATTAAACAGGGAATCTCCAGAATCTGCTCTGCATGAAAGCCCAATT  
 GATTTGCTGCTCTAACTGAGGCTCAAGCTGCGCCAATTACAAGGTGGCTTGCAGACAGA  
 ACTGATAACGCGACAACAAATGAAGTAAACATCTCTCACATGCCTCATCATGGGCTTGAT  
 GGAGGAGCTAAGGTCAGTAAAGTTGCTTGTAGGTCTATTAACCTTGATGATCATTTTAT  
 AATTGATTTATTTCTCTAGCCAGTTAACTTCCTAGGTGTGAATTCCTTCTAATTGTTTGC  
 GTGATTCTTTTGATATAAGCAGGCTAGCCCTTCAGCTGGTGCTTCCCTCAGCTGATTGG  
 TTCACAACAGAATATCCATGATAAATGAATTAGCCACAGTTTCTGCACCCATGCTACC  
 ACATGAAGACTTCAATAATTTCCCTCTAGGAGCCATTGGTAATTTTGATGGCAATATGAA  
 TCCTCGAGATCCAGTGGAGGAGTTCTTGAATCAAACCATTGCTGATCCAGATGAGCATTC  
 ATCAACAACATCAAAGGCTCAGTATGATTTCGGACACTGGAATCATACCAACTGAGTTTGA  
 GAACCATGGGGTGATGCAGGTAATGTTGTTCTCCCTAATCTGCACCTGCTGTTTAGGTTA  
 TAGTTATTGTTTTTAATTCTTATTATCCATGGAACCTTTCAGGGTGAATTCATGGATGA  
 TCTGAGTGGGTTGAAAAATTTAGATTTCTGGCCAGATGACCGAAATCCCCAGTTGAGTGC  
 ACTGTATGAGGACACACCATTGCTGCCTTATGATAGCACCAGGAGGTGCTCTCCAT  
 GGACTCTGGTGCTGAATCCTTGCAAGATCTATTCAACAGCATGGACGATTCAAACGCGAG  
 GAATAATGTATGGGGCAACGAACCATTCCTCCAGGGGACTGGATTTCCCATGTCTTGCC  
 GTTACAGCCGAACTCCGCATTTCCAAACCAGGGCACTGCAAATAGGAGGCTCATGCTACA  
 GCTATCAGAATCATTATCTCCTGATTTTGATGTGAGCATGACTAGAGATGAGTGTGAAGA  
 TGAGGAACCAGGTATTGTTGTAACCTCGAAGTATGTGAATGAAGCTCCTGAGGAGTCAAC  
 TGCAGAAAAGGATATGCCTTCTGATGGAGATGATGCTGAGCCAACGGGTATTACTATCCT  
 GAGGCGACGCCATGCTCCAACTGCAAGTTCGTTTTCTGATGGAGATGATGCTGAGTCAAC  
 GGGTATTACCATCCTAAGACAGCACCAAGCTCCAAATGCAAGCTTGCTTTCTGATGGAGA  
 TGATGCTGAGTCAACGGGTATCACTATCCTAAGACGACGCAAGCTCCAACTGCTAGCTC  
 AGCTAGTTCATTTACTCAACAGGGTGCTGCAGTGCAAAGGGTGCGGCTACAATCAAACCT  
 TGATGCAGCACCGTGTCTAGCGTTGATGGTTCATCAAGTTGCATCATAAATGAAGGTGA  
 AAGTGAACGCACCATGGAGAAACCTGAGGTGAGTTATATTACCCTTAAACTAATGCACTC  
 TTGTTCCATGGGAATAAGTTAAATCCTTTATATTCCATAGCCAGTTTGTTATTAATTGTA



CCAGAATGCAGGTAATTCCTTTGTCATGAACTACTAATGGATCCTGGTTAATTTCTTGTA  
 AAAAATAAAATAAAAGAACTCTAGGCTGATTATGTACTGCATGCTTTGAAAGTTCTGTTGC  
 TTTAGAAACGCTAATTTTCTCTTACGTTGTTCTTGCCAGATTGAAGAGAATGCAGGAAGT  
 ACCTTGGCTGAAGGTGGGACTTGCCATGAGGATGACCAGAAGGAGCATGGTAATACCACT  
 TTTGAAATATTTTCATCCAGAAAAATTTGTGATTTACCGTTCCTTCTCTCGTAAGCTAATCT  
 GATATATTGACATGTAGATGCTTCAGCAGCAAATGCTAAATCTGTTCTGAGGCTGCGGAA  
 GACAGCAGAGGGAAGCGACAAGGAGAACAAGCAGGAGGAAGAGGAGGGTGTCTTGCTTC  
 ACATGTGAGAGCACCAGGGAATAAGAGGGGATTCCCATCGTACATCATTGGCTGGTTCT  
 CTCTGTGGCTCTGGTCTGCTTATCTCCCTTGGGATTTATGGATGGGTGTAAACAGCTGC  
 TCCCCTGATGGTCTTCAAGATGACCATGCTTACTGGCACAGGCTCCCAACATTGACCTGC  
 TGTGCTGAGTGACCTGTTGTACATATTGCGTCTTACGCCCTTGTGTTTAGACGGCGGTTG  
 CTAGACACCTGGAGTGTTTGTTCCTTCCAGCGTGCTGCGGCAGAAGAAAAATCCAAA  
 AACAAAAAAGAGGGGCGAAAAACGAAGAAAAAAGAAGAGGTAGTGAATGAGGAAAGT  
 TGTTGTAGATGTTCTGTGACTTAGGTGCATGGTAGTATTCCTTCCTGCTGTTATTGCAGA  
 TGTTAGTAGCCACATACCCTAGTTGTTTCAGCAGTTGTAAGTCAGGTTAGGGATATGGTTA  
 CTTTTGTCTATGTAATGTTCTGTAGCATTATCTGAACCTGCTTTATCGGATGCAATTCG  
 TTTTCCTTTCAGTAAATCTCTGTGCTGCAAACTGTAGTTCCTGTGTAAGTTTGATGTGT  
 GAAATGTAAATACTTCTAGTACTAATACTATTGATGATGAAATGAGGAGGCA

CDS

> **ONAC037**

ATGACGGTGATGGAGCTCAAGAAGCTGCCGCTCGGGTTCAGGTTCCACCCACCGACGAG  
 GAGCTCGTCAGGCACTACCTCAAGGGGAAGATCACGGGGCAGATCAGGAGCGAGGCCGAT  
 GTCATCCCCGAGATCGATGTCTGCAAGTGCGAGCCGTGGGATCTCCCTGATAAGTCTCTG  
 ATCCGCTCCGATGATCCGGAGTGTTCTTCTTCGCGCCGAAGGATAGGAAGTATCCCAAT  
 GGGAGCAGGTCAACAGGGCGACGGAGGCCGGGTACTGGAAGGCCACCGGAAGGACAGG  
 GTGATCAGGTCCAAGGGTGACAAGAAGAAGCAGCAAGTAATTGGCATGAAGAAGACGCTC  
 GTGTTCCACCGGGGGCGTGCGCCGAAGGGTGAGCGGACTGGGTGGATCATGCATGAGTAC  
 CGCACCACCGAGCCGGAGTTTGTAGTCCGGTGAGCAGGGAGGTTACGTTCTTACCGGCTG  
 TTCCGAAAGCAAGAGGAGAAAAATTGAGCGACCCAGTCCGGATGAAGTGGATAGAAGTGA  
 TACTCACCACTCCTTCTCGTTCAACTCCTGATAACATGGAACCAATTGAAGACGGAAT  
 ACACCATTAACAGGGAATCTCCAGAATCTGCTCTGCATGAAAGCCCAATTGATTTGCCT  
 GCTCTAACTGAGGCTCAAGCTGCGCCAATTACAAGGTGGCTTGACAGACAGAACTGATAAC  
 GCGACAACAAATGAAGTAAACATCTCTCACATGCCTCATCATGGGCTTGATGGAGGAGCT  
 AAGCAGGCTAGCCCTTCAGCTGGTGCTTTCCCTCAGCTGATTGGTTCACAACAGAATATC  
 CATGATAATAATGAATTAGCCACAGTTTCTGCACCCATGCTACCACATGAAGACTTCAAT  
 AATTTCCCTCTAGGAGCCATTGGTAATTTTGATGGCAATATGAATCCTCGAGATCCAGTG  
 GAGGAGTTCTGAATCAAACCATTTGCTGATCCAGATGAGCATTATCAACAACATCAAAG  
 GCTCAGTATGATTTCGGACACTGGAATCATACCAACTGAGTTTGAGAACCATGGGGTGATG  
 CAGGGTGAATTCATGGATGATCTGAGTGGGTTGGAAAAATTTAGATTTCTGGCCAGATGAC  
 CGAAATCCCCAGTTGAGTGCACTGTATGAGGACACACCATTTGCTGCCTTATGATAGCACC  
 GACCAGGATGTGCTCTCCATGGACTCTGGTGCTGAATCCTTGCAAGATCTATTCAACAGC  
 ATGGACGATTCAAACGCGAGGAATAATGTATGGGGCAACGAACCATTCCTCCAGGGGACT  
 GGATTTCCCATGTCTTGCCGTTACAGCCGAACCTCCGCATTTCCAAACCAGGGCACTGCA  
 AATAGGAGGCTCATGCTACAGCTATCAGAATCATTATCTCCTGATTTTGATGTGAGCATG

ACTAGAGATGAGTGTGAAGATGAGGAACCAGGTATTGTTGTAACCTCGAAGTATGTGAAT  
GAAGCTCCTGAGGAGTCAACTGCAGAAAAGGATATGCCTTCTGATGGAGATGATGCTGAG  
CCAACGGGTATTACTATCCTGAGGCGACGCCATGCTCCAAGTTCGTTTTCTGAT  
GGAGATGATGCTGAGTCAACGGGTATTACCATCCTAAGACAGCACCAAGCTCCAAATGCA  
AGCTTGCTTTCTGATGGAGATGATGCTGAGTCAACGGGTATCACTATCCTAAGACGACGC  
CAAGCTCCAAGTCTAGCTCAGCTAGTTCATTTACTCAACAGGGTGCTGCAGTGCAAAGG  
GTGCGGCTACAATCAAACCTTGATGCAGCACCGTGTCTAGCGTTGATGGTTCATCAAGT  
TGCATCATAAATGAAGGTGAAAGTGAACGCACCATGGAGAAACCTGAGATTGAAGAGAAT  
GCAGGAAGTACCTTGGCTGAAGGTGGGACTTGCCATGAGGATGACCAGAAGGAGCATGAT  
GCTTCAGCAGCAAATGCTAAATCTGTTCTGAGGCTGCGGAAGACAGCAGAGGGAAGCGAC  
AAGGAGAACAAGCAGGAGGAAGAGGAGGGTGTCTTGCTTCACATGTGAGAGCACCAGGG  
AATAAGAGGGGATTCCCATCGTACATCATTGGGCTGGTCTCTCTGTGGCTCTGGTCCTG  
CTTATCTCCCTTGGGATTTATGGATGGGTGTAA

Protein

> **ONAC037**

MTVMELKKLPLGFRFHPTDEELVRHYLKGITGQIRSEADV IPEIDVCKCEPWDLDPKSL  
IRSDDPEWFFFAPKDRKYPNGSRSNRATEAGYWKATGKDRVIRSKGDKKKQQVIGMKKTL  
VFHRGRAPKGERTGWMHEYRTTEPEFESGEQGGYVLYRLFRKQEEKIERPSPDEVDRSG  
YSPTPSRSTPDNMEPIEDGNTPLNRESPESALHESPIDLPALTEAQAAPITRWLADRTDN  
ATTNEVNISHMPHHGLDGGAKQASPSAGAFPQLIGSQQNIHDNNELATVSAPMLPHEDFN  
NFPLGAIGNFDGNMNPDPVEEFLNQT IADPDEHSSTSKAQYSDTG IIPTEFENHGVM  
QGEFMDDL SGLNLD FWPDDRN PQLSALYEDTPLLPYDSTDQDVL SMDSGAESLQDLFNS  
MDDSNARNNVWGNEPFLQGTGFMSWPLQPNSAFPNQGTANRRMLQLSESLSPDFDVSM  
TRDECEDEEPGIVVTSKYVNEAPEESTAEDMPSDGDDAEPTGITILRRRHAPTASSFS  
DGDDAESTGITILRQHQPNASLLSDGDDAESTGITILRRRQAPTASSASSFTQQGA VQR  
VRLQSNLDAAPCSSVDGSSSCI INEGESERTMEKPEIEENAGSTLAEGGTCHEDDQKEHD  
ASAANAKSVLRLRKTAE GSDKENKQEEEEGV LASHVRAPGNKRGFPSYIIWL VLSVALVL  
LISLGIYGWV\*

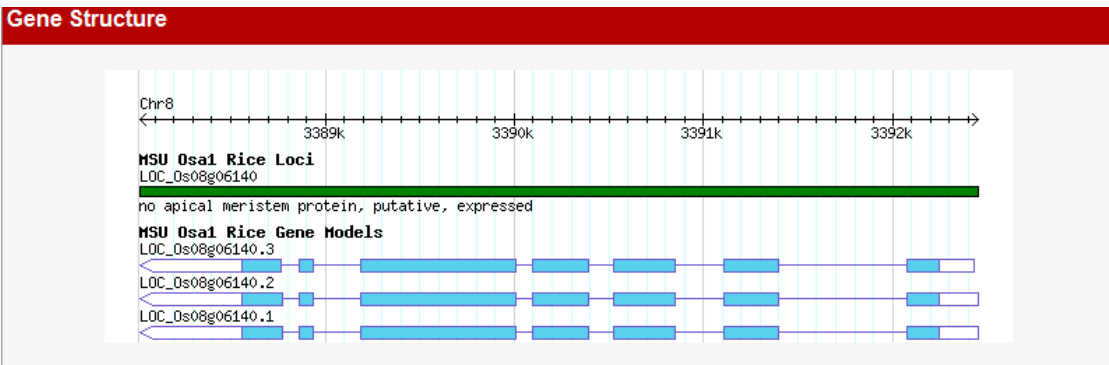

**LOC\_Os01g71790 (ONAC038) sequence information**

**Genomic sequence length:** 952 nucleotides

**CDS length:** 615 nucleotides

**Protein length:** 204 amino acids

## Genomic Sequence

> **ONAC038**

ACGAGGAACACACACACCCCTACCCGTCTCTGTTTCATCTCCACATCTTGTCTTCTCGCTG  
 TTGACTTCGAGCGGAGACTAGACTAGCTACTACTCGGAATGGGGAAGGAGATGAATCTGA  
 TCCGAGAAGACGAGTACGGCGGCGGCGGCGTTCGGGTTTCGAGCCGACGGAGGACGAGCTGA  
 TGCTCCACTTCTCCGTCCGCAGCTGCGCGGGTTTCGCGCCGCGCGTGGCGGGCGCCGTGG  
 TGGAGGCCGACCCCTGCGGCGGCGCGCCGTGGGAGCTCCTGGCGCGGCACGGGAGGCGGG  
 AGGAGGGGTTCTTCTTCTCGGCGCGCGCGGAGGAAGCCCTCGGTGCGGCGGACCGTGG  
 CGGGCTGCGGCGGCGGCGGTGGCGGCGGTGGCGCGTGGATGCACAGCTCCACCAAGAACG  
 GGCAGTCCGTGACCGACCTCGGCGTGGTGGTGGTGGTGCAGGATCAACTACTGCTTCT  
 ACGTGC GCGGCGAGATGGGGCAGCAGCGGAGCACCGGGTGGATGATGGCCGAGTACGAGA  
 TCACCGACCCGCGGTGCTACCGCCGCGCCGACGACGGCGAGGAGGACGACTTCTGGGTTC  
 TCTGCCATGTCAGGAAGAGCTCGAGGCCCCAAGCCGCCAAGATCTCTCCAGCCAAGCCAG  
 CACGGCGGCGCAAGCCCGCCGCCGCCGCCGCGGATGTCCGGGCTGCGTGATCCGGCC  
 GACGGCGGAGATCACGAGGTTTGCCCTCGCGTTGGGATTCGACTTCGGTTATACTTTTGCT  
 TTGGAATTGTGTTCTTTGCTTTATTCTCCTCTAGCATCTGCCATACATTCCGTGTGA  
 TGAACACTGCGAATCAAATGGGACGTTTAAGATGTTGTTGTTGTACTGATAGCGTGATTG  
 AATTCATGGCCTCTTTCTGCCAAGCCGCATATGGAGTTTTTTTTTGGTGTTC

## CDS

> **ONAC038**

ATGGGGAAGGAGATGAATCTGATCCGAGAAGACGAGTACGGCGGCGGCGGCGTTCGGGTTC  
 GAGCCGACGGAGGACGAGCTGATGCTCCACTTCCTCCGTCCGCAGCTGCGCGGGTTCGCG  
 CCGCGCGTGGCGGGCGCCGTGGTGGAGGCCGACCCCTGCGGCGGCGCGCCGTGGGAGCTC  
 CTGGCGCGGCACGGGAGGCGGGAGGAGGGGTTCTTCTTCTCGGCGCGCGCGGAGGAAG  
 CCCTCGGTGCGGCGGACCGTGGCGGGCTGCGGCGGCGGCGGTGGCGGCGGTGGCGCGTGG  
 ATGCACAGCTCCACCAAGAACGGGCAGTCCGTGACCGACCTCGGCGTGGTGGTGGTGG  
 TGCAGGATCAACTACTGCTTCTACGTGCGCGGCGAGATGGGGCAGCAGCGGAGCACCGGG  
 TGGATGATGGCCGAGTACGAGATACCGACCCGCGGTGCTACCGCCGCGCCGACGACGGC  
 GAGGAGGACGACTTCTGGGTTCCTCTGCCATGTCAGGAAGAGCTCGAGGCCCCAAGCCGCC  
 AAGATCTCTCCAGCCAAGCCAGCACGGCGGCGCAAGCCCGCCGCCGCCGCCGCCGCGGAT  
 GTCCGGGCTGCGTGA

## Protein

> **ONAC038**

MGKEMNLI REDEYGGGVGFEPTEDELMHLRPLRLGFAPRVAGAVVEADPCGAAPWEL  
 LARHGRREEGFFFSARARRKPSVRRTVAGCGGGGGGGAWMHSSTKNGQSVTDLGVVVRW  
 CRINYCFYVRGEMGQQRSTGWMMAEYEITDPRCYRRADDGEEDDFWVLCHVRKSSRPQAA  
 KISPAKPARRRKPAAAAAADVRAA\*

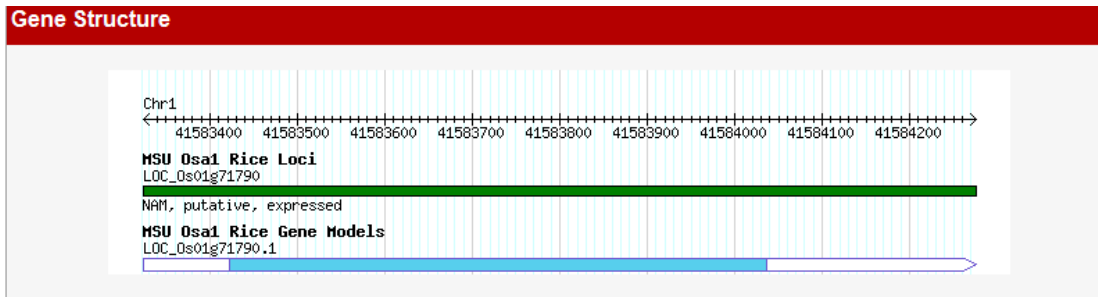

### LOC\_Os03g21030 (ONAC039) sequence information

**Genomic sequence length:** 2038 nucleotides

**CDS length:** 1077 nucleotides

**Protein length:** 358 amino acids

#### Genomic Sequence

##### > ONAC039

```
AACCCCAAGTCCATTCTCTCGTTCCCAAACCCTGCATCCTTCTCTTTCACACAAGCCTCT
CTCTCGCCGGCTTCGGCGTCCGTCTCCTCCTCCTCTTCTCGTCTAGCCTTGTGGCGGCG
TGCGGTGCGGTGCGGTGAGGAAAGGAGGGAGCTTTGAAGGTCGGGGGAGGGCGGAGGAGA
TGCTGAGGTGTCCGTTATGGCCGAGGTGGAGGAGACGGCGGCGGCGGCGCCGCTGGACC
TGCCGCCGGGTTTCAGGTTCCACCCACCGACGAGGAGATCGTCTCGCACTACCTCACCC
CCAAGGCCCTCAACCACCGCTTCTCCTCCGGCGTCATCGGCGACGTCGACCTCAACAAGT
GCGAGCCATGGCACCTCCAGGTTTGTTCCTGAATTCTCTCCTTTTTTTTCTCCCCTTGA
TTCGTTCTGTACGATAAATCTTTGGGCTTACGGATGAGTTTTCGTGGTTTGATTTTGGCA
GCCATGGCGAAGATGGGGGAGAAGGAGTGGTACTTCTTCTGCCACAAGGACCGCAAGTAC
CCGACCGGGACGAGGACGAACCGGGCGACGGAGAGCGGCTACTGGAAGGCCACCGGCAAG
GACAAGGAGATCTTCCGCGGGAGGGGCATCCTCGTCGGCATGAAGAAGACGCTCGTCTTC
TACCTCGGCCGCGCGCCCCGTGGCGAGAAGACCGGCTGGGTGATGCACGAGTTCCGCCTC
GAGGGCAAGCTCCCCAGCCAGTCCCCGCGCTCCGCCAAGTCCGGCCGTTGCGTCCTTGC
CTTGCCATGCTACTCTCGCTTCTGCTTACTTCTCCAAAGTTTGAAAATTTTCCTTCCTTTC
TCGGTGCATGTGCTGATTCTCATCTTTCTCGACGCGTTTGTGTTGCGAACAGGACCAGT
GGGCGGTGTGCAAGGTGTTCAACAAGGAGTTGGCGCTGGCGGCGAAGAACGGGCCAATGG
CGGTGACCGAAGCGACCGCCGACGACGCGGGGATCGAGCGGGTCGGCTCGTTTCAGCTTCC
TCAGCGACTTCATCGACCCCGCCGAGCTGCCGCCGCTGATGGACCCTTCCTTCGTCGCCG
ACATCGACGGGGTGACGACGCCAAGGTGTCCGCGTCGACCTCCGGGCAGGCCCGGATCG
CCGCCGGCTTCCATGTCGCGTCGAGGTCATGAGCTACCAGCAGGTCAAGATGGAAGAGC
CGTTGCCGCTGCCGTACCTGCACCAGCAGCCGCCGCGGATGCTGCACTCGGGTCAGTACT
TCTCGTCCCCGGCGGTGCACCCCGGCGACCTGACGCCGTCGGCGATCCGGAGGTACTGCA
AGGCGGAGCAGGTCTCGGGGACAGCTCGGCGCTCAGCGCCTCGCGCGACACCGGGCTCA
GCACCGACCCCAACGCCGCCGGCTGCGCGGAGATCTCGTCGGCGCCGACGTCCCAGCCGT
TCCCGGAGTTCGACGACGGGATTCTGGGCCTCGACGACTTCTGGAACATAATCCACGCCTG
AATGATCCGGAGCTAGCTCCCTACCGACCTTGGCGTACAGGATTTTGCTTCAGGCTGGTT
GATTAATTACTTGATTTGATTAATTAACCTGGTGTTTCATGCTTGGGTAAATTAGTGGA
GTTTGTTGATGCATCCTTCTCTCCTCCTCCGATCGAAGGCTTCTTCTCGGGATGGGTT
```

CGGATGATCAGATTATTTATCATCCATCCAGACCTCCAGGGATTAGCTAGGACTCCTTGT  
 TAATTAATCCTAGCTAGCTAGGTTTCTTCATGTCTTGATCTGATGTAAATACAATTACTA  
 CTACTAAGTACGGGGTATCCTGATTGTGTCTAGTAGCATGATGATTGATTATACTACAAT  
 CAATGGGGTGTAGATTAGGGGTGGATTGATCATTACGAATTGATTAATTTGGCATTGGA  
 TGAGCCAGCTAGCTGCTAGCTTTATAAAGCTTTATACTATGTACATGTACCATTAATTGC  
 TTGAGCTAGACATCTCATCATATGTGAATTGATGCTTCGGTTTAGCCTTTTTCCTTTA

CDS

> **ONAC039**

ATGTCTGAGGTGTCCGTTATGGCCGAGGTGGAGGAGACGGCGGGCGGGCGCCGCTGGAC  
 CTGCCGCCGGGGTTCAGGTTCCACCCACCGACGAGGAGATCGTCTCGACTACCTCACC  
 CCAAGGCCCTCAACCACCGCTTCTCCTCCGGCGTCATCGGCGACGTCGACCTCAACAAG  
 TGCGAGCCATGGCACCTCCCAGCCATGGCGAAGATGGGGGAGAAGGAGTGGTACTTCTTC  
 TGCCACAAGGACCGCAAGTACCCGACCGGGACGAGGACGAACCGGGCGACGGAGAGCGGC  
 TACTGGAAGGCCACCGCAAGGACAAGGAGATCTTCCGCGGGAGGGGCATCCTCGTCGGC  
 ATGAAGAAGACGCTCGTCTTCTACCTCGGCCGCGCGCCCCGTGGCGAGAAGACCGGCTGG  
 GTGATGCACGAGTTCCGCCTCGAGGGCAAGCTCCCCAGCCAGCTCCCGCGCTCCGCCAAG  
 GACCAGTGGGCGGTGTGCAAGGTGTTCAACAAGGAGTTGGCGCTGGCGGCGAAGAACGGG  
 CCAATGGCGGTGACCGAAGCGACCGCCGACGACGCGGGGATCGAGCGGGTCGGCTCGTTC  
 AGCTTCCTCAGCGACTTCATCGACCCCGCCGAGCTGCCGCCGCTGATGGACCTTCCTTC  
 GTCGCCGACATCGACGGGGTGGACGACGCCAAGGTGTCCGCGTCGACCTCCGGGCAGGCC  
 GCGATCGCCGCCGGCTTCCATGTGCGCTCGCAGGTCATGAGCTACCAGCAGGTCAAGATG  
 GAAGAGCCGTTGCCGCTGCCGTACCTGCACCAGCAGCCGCCGCGGATGCTGCACTCGGGT  
 CAGTACTTCTCGCTCCCGGCGGTGCACCCCGGCGACCTGACGCCGTCGGCGATCCGGAGG  
 TACTGCAAGGCGGAGCAGGTCTCGGGGCAGACGTCGGCGCTCAGCGCCTCGCGCGACACC  
 GGGCTCAGCACCGACCCCAACGCCCGGGTGCAGCGGAGATCTCGTCGGCGCCGACGTCC  
 CAGCCGTTCCCGGAGTTCGACGACGGGATTCTGGGCCTCGACGACTTCTGGAATAA

Protein

> **ONAC039**

MSEVSVMAEVEETAAAAPLDLPPGFRFHPTDEEIVSHYLTTPKALNHRFSSGVIGDVDLNK  
 CEPWHLPAMAKMGEKEWYFFCHKDRKYPTGTRTNRATESGYWKATGKDKEIFRGRGILVG  
 MKKTLVFYLGRAPRGEKTGWVMHEFRLEGKLPSQLPRSAKDQWAVCKVFNKELALAAKNG  
 PMAVTEATADDAGIERVGSFSLSDFIDPAELPPLMDPSFVADIDGVDDAKVSASTSGQA  
 AIAAGFHVASQVMSYQQVKMEEPLPLPYLHQQPPRMLHSGQYFSLPAVHPGDLTPSAIRR  
 YCKAEQVSGQTSALSASRDTGLSTDPNAAGCAEISSAPTSQPFPEFDDGILGLDDFWN\*

**Gene Structure**

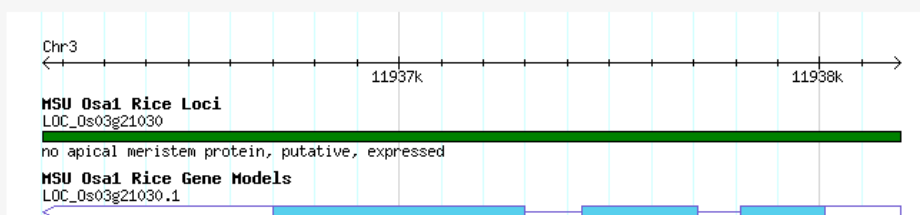

**LOC\_Os08g44820 (ONAC040) sequence information****Genomic sequence length:** 4692 nucleotides**CDS length:** 1971 nucleotides**Protein length:** 656 amino acids

Genomic Sequence

> **ONAC040**

```

CCCCCGTCCTTTCTTATAGCCCAAGCCATCCTCATCTCCTTCCTTGCTGCGTTTCGTTTC
TTCCCCAAAAACCAAGGGGGAAGGCAAACCTTTCCCCAAATCTCAACCCCAATCCCAATCT
AGGGCACATGAGCCACCCCTCGTCGTCGTCCTCCTCCGCTCCCCCGGCGGCGGCGGAGGC
CACCTCCCTCGCACCGGATTCCGGTTCCACCCGACGGATGAGGAGCTGGTGTCTACTA
CCTGAAGCGGAAGGTCCATGGGCGGCGCGCTCAAGGTGGACGCCATCGCGGAGGTGGACCT
GTACAAGGTGGAGCCATGGGACCTCCCCGCGCGCTCCCGCCTCCGCAGCCGCGACTCCCA
GTGGTACTTCTTCAGCCGCTCGACCGCAAGCACGCCAACC GCGCCCGCACCAACCGCGC
CACCGCCGGCGGCTACTGGAAGACCACCGGCAAGGACAGGGAGGTCCGCAACGGCCCCAC
CACCGTCGGCATGAAGAAGACCCTCGTCTTCCACGCCGGCGCGCCCCCAAGGGCGAGCG
CACCAACTGGGTCATGCACGAGTACCGCCTCGACGGCCAAACCACCATCCCACCACAGGT
CCCCCATCCCTTCCTATCTTACCCTTACCTTACCTGCTCATGTATCAGATTGACCCATG
TTTCAGATTATATTTCTATTTCTCGCCATATGTATCCCTCCATTTCTCTTTCTATCTTAC
CCTTACCTGCCCATCTATGATTGATTGATTGATAACCCATGTTTCAGATTACAGTTTTCT
TTCTCGCACTATGTATATTAACGAATTGGTGCTCGAGTTATTAATCCATGATTTTGCTA
GCTATGGTCTCTCTTAGATATTTTTTTTTTAAAAAATATGTTTCCCCCTACACTGTTTC
GGGGAACAAAAACAAAGTGTGTGATAACTCACTGAACTGCTAGTCACTGATTTGCCCGTC
CCCAACAGCGCTCCTGCCTGATTGCTAGATTACTACTAGTACGTAGGCATGTTTACTGCC
GCTACGGCCTCAATTTGTTGATTATTCTGCTGCTGATAATGCGATGCCATGATGCTGATT
TTGAGACCTATATGTGTACAGGATTCATTTCGTCGTGTGCCGTATCTTCCAGAAAGCCGGC
CCAGGTCCACAGAACGGGGCTCAGTACGGAGCTCCTTTTGTGAGGAGGAGTGGGAGGAG
GATGACGAGGATGTTGGTTTGCTACCGGTGGAGGAGAAGGACAACCTCTGATGACCAGGAA
AAGGAAATTTCTGGTGCTATGGAGAAGGGCTATCTCCAGATGAGTGACCTCGTTCAGGTA
CAGTTTCAAATCGCACGCTTTCTGTTTTTCTCACC GTTCTAGTACAAATCTAGCACCTTTT
AACATCAGATGCTGAAATGCATACCAATCAATTT CAGGACTGCTTCTATATGTGTAGTTT
ATTCCAGTCATTCTTCCATATCAATACTTGACATTTTTCCTACCAAACGTCAAATAGTA
ATTGTTGATGGCGCCTTTTGTACGATTAAAGTTATTTTTTTTTTATTGAACATGGCCTTTTGT
GGTATGTTGTGTTTATGATCGTATACATTGATTAACCATCTATCTCTCTCAGAAAAGGAA
CGCTGGATTTTCTTCAGCATTGCCCTTTAGACAACTGTAATGATGAATTTGTATGCCGT
GCTATGTACTGTGGATGCTGACATGTATTCACTTTT GATGTACATCTTCATATCTCTCAG
GACTAGGTAGCAAGTAATATGAGATCACGACCCACAAGAGTCATGATATCATAGTATCCA
TGTCTATGAGCATTA AAAAGTTGGATTTTTTGTGCTGCCTATCTATGTCTTCATTGTATA
TTACCAACTTCTGAGACCCCTAAAACATATATTGTTATAACTTGTTCAACAAATTGGTCT
TGGTAAAAATGAACCTATTTTCTCTAGTAAAAGAGGAGCGTATTGTTTCGTCCACACAAGAC
TTCCTTTTTTGTATGAGTTTTGTTCTGCAGGTGATTTTTGTTTTTTTCATGTCTCAGTTTA
TCAGTTTCTTTATCCAGTATATATCTGCCTCTGTGTGCGATTGTTCTAATATGCTGTCATT
TCCTTTTTTTTTTTCAGAACTTGGTTGATCAAAATGAGAATGGTACCATTGCCTTGCCAGT
TTCTGACAATTCAAACAACAGCAACCATTCTGAAGACGTGGATGGAAATTCAGGGGACAT
TTTAAGTGACCAAAACCTTGGGTCTAACTTTCTTCACCATGTTGAGCCTGTGGAGCAAAA

```

TGGCCTAGTGCTTAATGAAAAATATGTTTTCTAGTGCCAATGCTGGAGACCTTTTAAATAT  
 ATCTAGCCCCAATGATGGATTCCCTAGAACTGAAGGATTTTGCAGATATTGCAGATTTGGA  
 GAATCCTTTAGCCAATGAATCCACCATCTGGCCTTCTGATGGTTGGCCCTGGAAATCAAC  
 TGATTCCATGGAGGCTGTGAATGGGGCTAGCAATGAATTTTCTCCCTTAGCTGGTGAACA  
 GATATTCCAGCCAGAAGAATTGGAACAGTTGTTACAGTCACTGCAAGAAGACTCTCATAT  
 GGGTTCAACTATCTCTGATCCCCCACATTCATCTATAACAAATTTAGCTAAGCCAGAGGA  
 AGATTGTCTAATGTTCTATGATGCACCCTTTGATTCTTCAATGTGTGATGATGGTTTTAG  
 ACAGCTCAATGGATTTCTTGGCTCCCCATCGACCAATCTATCTGGTATTGACATGGTGGA  
 CGATGGTATGCCGTACTATGATGCGATGGATGATAACTTGTTTAAATGATCTTCTGAGCTC  
 AGTACAGCCATCAGCTGGTAGCAGTTCCCATGCTTTTAGTGGGCCAGTCCTTACTCAAGA  
 GGTACAGTCATTTGCATCAAGCGATGAACTTGTTCATTTTGTGCACGCCATTGATGTGT  
 TTAAGTCAATGTTCTACTTTTACAGGTCAACAATTCAACCTATACATAT  
 AGTCCAACCTCAAAAAGTTTTAGAACCTAATTTTGTAGTTGGTGGCCCATCATCTGCTAGG  
 TTACCTGAAGCGGGTAGTCAGTTAAATTATGTTGTTTTACCAGGTAATATTACTATGGAG  
 AAGTACCATAGGTCAATTATTATTTCCCTGCTCTTTAGTGCTGATCCATCATGGAAAAAGA  
 GCATTCTCAGCACTTTTGGGCCACTAATAATTAATCTTTTTTTTTTGAATGAGGAAT  
 TGTTTCATTGTTGTATTTACTTGTCTGATTGAGCAAGATTTAAGTATTACTAGATCATTT  
 TTGTGGAGACACTCTTATCTTGCTCAATCAGTGCAGTGTTACACACAATTGGCATGTGAT  
 TTCTCATTGCCTGGCCATTAACCTGTACCTGTAATTGAACATTATTGACAAGTGTGTGTA  
 CTATATTCCACAGATTCCCAGACCAAGAGTAGTCTGATCGGGAAGCGTTTTGTAAAGATA  
 CTGGATTCAATCTCTGCTCCCCCTGCTTTTGCAGCAGCAGAGTTCCCAGCTAGCCTTCGC  
 AAATCCTTGGCTCCTATTTCTGGAGCTCATCACAACTATCCGTGTCTCTGCTGAAGTA  
 ATCAGCATAGGAAGTTAACTCCTGATTCTCAAGATAAGTGGTCCCTTGAGAAGGATGAA  
 GGCATGGAGCTGCTCTTCTCGGCAGGTTTTGAGCCTGATACCCGTGTACACTTTGGCTGC  
 AACACAATAACCGCAGTACTGCGTGGTGGCTTCTGCCTCTTCTTTTTCAGCAATAATG  
 CTCTTGGTGAGCTACGAGGTGGGCATGTGCATCTATGGCAAGTAGGCCTGCTGGTATTGG  
 AGACGTTAAGAACATGACGTTAGGTAATCCTATCTGTATTTGAGGCAAAGTAGGGACCTC  
 CTGCTGCTGGCTTAATGTATTGCACTGCATGACATTACATGACCTCCATGTGTTGAACAA  
 GGGCTGAGGCTGTTAACTATAGCACTAGCAGTACCGTTTTGCAGCTCGAGAGAGCTAGT  
 AGTGTATGTATGAATTCCTCAGGTGCTATTCGTAGTAGTAAGCGCGAATTGATTATTATC  
 AGTTCATGATGGTGCTACTATTATCATATTGTTTCTGGTTGGCATGGGCGGTGCTAGTG  
 CAAACTGCAGAGTGCTGTAAATATTCCCCAAATCTGCAATGAATTGAACGAGGGTGCATT  
 TGCCCTTATGACTGTTGCGGTGTTGCAGGTTTTTGAATGAGAAGGAAAGATTACTATGTA  
 GAAAACGCTGTGTTGTATTTGTGCGTCGCAGGCATCTGGTGGTAAATTCTGTTACTGAAG  
 AAAGTCCTTGTGCTATATATTTGTGTGTTTACTTATGCTCTTGCCTGGAATAAACTCG  
 AGGATCTTTTCCCTTGCAAAACCTGGGAAAAATCCAGAAGTATATGCTATACGATCAGCCGC  
 ATTGCATTTGGTTGATTGTATTATAGTGTACAACTCGGCAACATAGTTGAAATTTCTGT  
 GGCATCCTTATTAATAAAATACTTATTATACATACGTATAAATAACTGCTGCAAGTAATC  
 TGCAAGCAGTTGTTTCTCTCAGCTACTAGTAGTTTGTGTGTGTGTGTTTCCGTCGAAAAC  
 CCCTGTGAAATAACACAAGCCAGGGTTACCGCAACAATGATTCTACATTTCTCCTGGAAG  
 CATGGTGTCTCC

CDS

> **ONAC040**

ATGAGCCACCCCTCGTCGTCGTCCTCCTCCGCTCCCCCGGCGGCGGCCGAGGCCACCTCC

CTCGCACCGGGATTCCGGTTCCACCCGACGGATGAGGAGCTGGTGTCTACTACCTGAAG  
 CGGAAGGTCCATGGGCGGCCGCTCAAGGTGGACGCCATCGCGGAGGTGGACCTGTACAAG  
 GTGGAGCCATGGGACCTCCCCGCCGCTCCCGCCTCCGCAGCCGCGACTCCCAGTGGTAC  
 TTCTTCAGCCGCTCGACCGCAAGCACGCCAACCGCGCCCGCACCAACCGCGCCACCGCC  
 GCGGCTACTGGAAGACCACCGGCAAGGACAGGGAGGTCCGCAACGGCCCCACCACCGTC  
 GGCATGAAGAAGACCTCGTCTTCCACGCCGCGCGCCCCAAGGGCGAGCGCACCAAC  
 TGGGTCATGCACGAGTACCGCCTCGACGGCCAAACCACCATCCCACCACAGGATTCATTC  
 GTCGTGTGCCGTATCTTCCAGAAAAGCGGCCAGGTCCACAGAACGGGGCTCAGTACGGA  
 GCTCCTTTTGTGAGGAGGAGTGGGAGGAGGATGACGAGGATGTTGGTTTGCTACCGGTG  
 GAGGAGAAGGACAACCTCTGATGACCAGGAAAAGGAAATTTCTGGTGCTATGGAGAAGGGC  
 TATCTCCAGATGAGTGACCTCGTTCAGAACTTGGTTGATCAAAATGAGAATGGTACCATT  
 GCCTTGCCAGTTTCTGACAATTCAAACAACAGCAACCATTCTGAAGACGTGGATGGAAAT  
 TCAGGGGACATTTTAAAGTGACCAAAAACCTTGGGTCTAACTTTCTTCACCATGTTGAGCCT  
 GTGGAGCAAAATGGCCTAGTGCTTAATGAAAATATGTTTTCTAGTGCCAATGCTGGAGAC  
 CTTTTTAATATATCTAGCCCCAATGATGGATTCCCTAGAACTGAAGGATTTTGCAGATATT  
 GCAGATTTGGAGAATCCTTTAGCCAATGAATCCACCATCTGGCCTTCTGATGGTTGGCCC  
 TGGAAATCAACTGATTCCATGGAGGCTGTGAATGGGGCTAGCAATGAATTTTCTCCCTTA  
 GCTGGTGAACAGATATTCCAGCCAGAAGAAATTGGAACAGTTGTTACAGTCACTGCAAGAA  
 GACTCTCATATGGGTTCAACTATCTCTGATCCCCCACATTCATCTATAACAAATTTAGCT  
 AAGCCAGAGGAAGATTGTCTAATGTTCTATGATGCACCCTTTGATTCTTCAATGTGTGAT  
 GATGGTTTTAGACAGCTCAATGGATTTCTTGGCTCCCCATCGACCAATCTATCTGGTATT  
 GACATGGTGGACGATGGTATGCCGTACTATGATGCGATGGATGATAACTTGTTAATGAT  
 CTTCTGAGCTCAGTACAGCCATCAGCTGGTAGCAGTTCCCATGCTTTTAGTGGGCCAGTC  
 CTTACTCAAGAGGTCAACAATTCAACCTATACATATAGTCCAACCTAAAAGGTTTTAGAA  
 CCTAATTTTGTAGTTGGTGCCCCATCATCTGCTAGGTTACCTGAAGCGGGTAGTCAGTTA  
 AATTATGTTGTTTTACCAGATTCCCAGACCAAGAGTAGTCTGATCGGGAAGCGTTTTGTA  
 AAGATACTGGATTCAATCTCTGCTCCCCCTGCTTTTGCAGCAGCAGAGTTCCCAGCTAGC  
 CTTTCGAAATCCTTGGCTCCTATTTCTGGAGCTCATCACAACACTATCCGTGTCTCTGCT  
 GAAGTAATCAGCATAGGAAGTTTAACTCCTGATTCTCAAGATAAGTGGTCCCTTGAGAAG  
 GATGAAGGCATGGAGCTGCTCTTCTCGGCAGGTTTTGAGCCTGATACCCGTGTACACTTT  
 GGCTGCAACACAATAACCGCAGTACTGCGTGGTGGCTTCTGCCTCTTCTCTTTTCAGCA  
 ATAATGCTCTTGGTGAGCTACGAGGTGGGCATGTGCATCTATGGCAAGTAG

#### Protein

#### > ONAC040

MSHPSSSSSSAPPAAAEATSLAPGFRFHPTDEELVSYYLKRKVHGRPLKVDAIAEVDLYK  
 VEPWDLPARSRLRSRDSQWYFFSRLDRKHANRARTN RATAGGYWKT TGKDREVRNGPTTV  
 GMKKTLVFHAGRAPKGERTNWVMHEYRLDGQTTIPPQDSFVVCRI FQKAGPGPQNGAQYG  
 APFVEEEWEEDDEDVGLLPVEEKDNSDDQEKEISGAMEKGYLQMSDLVQNLVDQNGTI  
 ALPVSDNSNNSNHSEDVDGNSGDILSDQNLGSNFLHHVEPV EQNGLVLNENMFSSANAGD  
 LFNISSPNDGFLELKDFADIADLENPLANESTIWPSDGWPWKSTDSMEAVNGASNEFSPL  
 AGEQIFQPEELEQLQLSLQEDSHMGSTISDPHSSI TNLAKPEEDCLMFYDAPFDSSMCD  
 DGFRQLNGFLGSPSTNLSGIDMVDGMPYYDAMDNDL FNDLLSSVQPSAGSSSHAFSGPV  
 LTQEVNNSITYTSPTQKVLEPNFVVGAPSSARLPEAGS QLNYYVLPDSQTKSSLIGKRFV  
 KILDSISAPPAFAAAEFPASLRKSLAPISGAHNTIRVSAEVI SIGSLTPDSQDKWSLEK



DEGMELLFSAGFEPDTRVHFGCNTITAVLRGGFCLFFFSAIMLLVSYEVMCIYGK\*

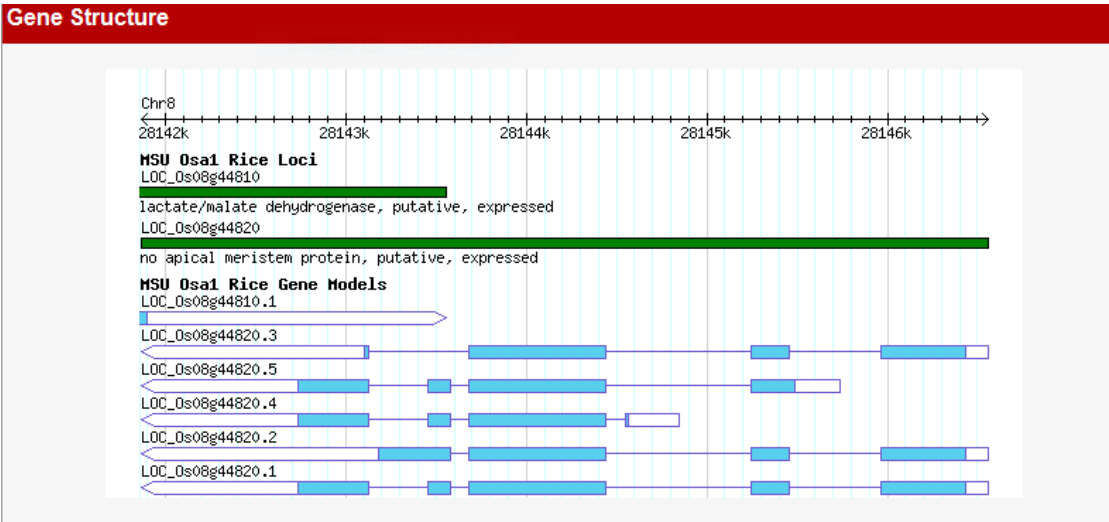

**LOC\_Os01g70110 (ONAC041) sequence information**

**Genomic sequence length:** 1202 nucleotides

**CDS length:** 687 nucleotides

**Protein length:** 228 amino acids

Genomic Sequence

**> ONAC041**

ACCAACTACTCCTCCACCTCTTACCTGACATGTAATAAGCGAGCTGACCAACAAACCCAA  
CCCCGACCCGCGCCGCCGCCGCCAGCGAGGTCGTCGCCGGCGTCTAAGCTCTCATTCAT  
GGCGGCGGAGGCGGCTCCGGTGGCGGTGGTGGGTACCGGATGCTGCCGCAGGCGGGGTT  
GCCGATCGGTTTCCGGTTCGACCCACCGACGAGGAGCTCCTGCTCCACTACCTCCGCCG  
CAAGGTCATGTCGCGCCCCCTCCCCGCCGACGTCATCCCCGTCGCCGACCTCGCCCGCCT  
CCATCCATGGGACCTTCCAGGTACGCGCGCGGCCACGATCATGGCGCTAGCTTCTTCGTT  
TTTGGGGGGTTTTTGGCATTGCGTTGACGAGCATCGGTGGCGGATTATTTACAGGCGAGGG  
AGACGGCGAGAGGTACTTCTTCCACCTGCCGCGACGAGCTGCTGGCGGAGGGGCGGCGG  
CGGGAGCAGGGCGGGCGGCGGCGGCGGCGGCGTGGAGGGCGTCCGGGAAGGAGAAGCTCGT  
CGTCGCGCCGCGCTGCGGCAAGCGGCCCCGTCGGCGCCAAGCGGACGCTCGTCTTCTCCG  
CCGCGGCGGCGCCCGCACCGACTGGGCCATGCACGAGTACCGCCTCCTCCCCGCCGACGA  
CCATCCGCCGGAGGCCAACGACGTCCTGGGTGGTCTGCCGCGTATTCAAGAAGACCACCAC  
GCTGGCTCACCGCCGTTCCGCCCGCTCCATCCGTGGCGCGCCACGCCGGCGAGCCGCCG  
CGCCGACGACGACGACATGCCGTCCTCGCCGTCGTCCTGCGTGACGACGGCGGCGACGC  
GGGGGAGGAGGAGAAGAGAGCAGCAGCTGCAGCGTCGTCGCTTCTAATTGTCCATGAGA  
TGATCAGATGAGAGAGGGAGAGGTTTTACCGTGTTAGTGTGTTGACTAGGCCGTTAATTAC  
CATGCTTTTCATGTCTTAATCAGCGCCCTTCTTTTGCTCTACTAATGTCTTTTAATTAATT  
AACTAGTTGTAATTCCTAGCAAGAGAGAATCAGAATCGAGCTCAAACAAAGAAGAGAAAA  
AAAAAGAAAAGAAAATTCTCATCTTTGTTTGAGCTCACTCCGAACTCCGAAGATAATCAA  
TTATCCTTGTTTTCAATCTCTTCAGTCACTCTGTTTCAATTTAAAGCTTCTCAATCAACA  
TA

CDS

> **ONAC041**

ATGGCGGCGGAGGCGGCCTCCGGTGGCGGTGGTGGGTACCGGATGCTGCCGCAGGCGGGG  
 TTGCCGATCGGTTTCCGGTTCCGACCCACCGACGAGGAGCTCCTGCTCCACTACCTCCGC  
 CGCAAGGTCATGTCGCGCCCCCTCCCCGCCGACGTCATCCCCGTCGCCGACCTCGCCCGC  
 CTCCATCCATGGGACCTTCCAGGCGAGGGAGACGGCGAGAGGTACTTCTTCCACCTGCCG  
 GCGACGAGCTGCTGGCGGAGGGGCGGCGGGGAGCAGGGCGGGCGGCGGGCGGGCGCG  
 TGGAGGGCGTCCGGGAAGGAGAAGCTCGTCTGTCGCGCCGCGCTGCGGCAAGCGGCCCGTC  
 GCGCCAAGCGGACGCTCGTCTTCTTCCGCCGCGGCGGCCCGCACCGACTGGGCCATG  
 CACGAGTACCGCCTCCTCCCCGCCGACGACCATCCGCCGAGGCCAACGACGTCTGGGTG  
 GTCTGCCGCGTATTCAAGAAGACCACCACGCTGGCTCACCGCCGTTCCGCCCGCTCCATC  
 CGTGGCGCGCCACGCCGCGAGCCGCCGCCGCCGACGACGACATGCCGTCCTCGCCG  
 TCGTCTCGTGTACGGACGGCGGCGACGCGGGGAGGAGGAGAAGAGAGCAGCAGCTGC  
 AGCGTCGTCGCTTCTAATTGTCCATGA

Protein

> **ONAC041**

MAAEAASGGGGGYRMLPQAGLPIGFRFRPTDEELLHLYLRRKVMRPLPADVIPVADLAR  
 LHPWDLPGEGDGERYFFHLPATSCWRRGGGSRAGGGGAWRASGKEKLVVAPRCGKRPV  
 GAKRTLVFRRGGARTDWAMHEYRLLPADDHPPEANDVWVVCRVFKKTTTLAHRSPPSI  
 RGAPRRRAAAADDDMPSSPSSCVTDGGDAGEEGEESSSCSVVASNCP\*

**Gene Structure**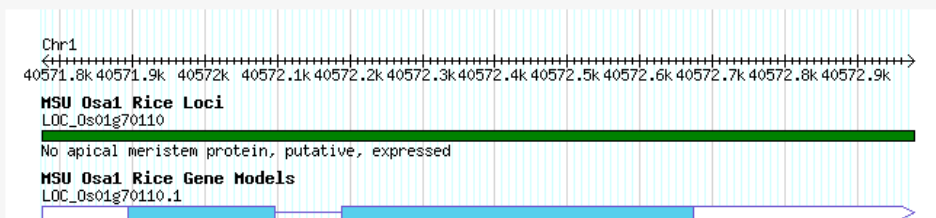**LOC\_Os09g32040 (ONAC042) sequence information****Genomic sequence length:** 3207 nucleotides**CDS length:** 2109 nucleotides**Protein length:** 702 amino acids

Genomic Sequence

> **ONAC042**

GAGTTGACTCGCCATTTCCGCCATTTTCGTCGAGAGGTTGCTGTGCCAGTCACCAACCCATT  
 CCGGCGGCGGCGGCGGAGGAGACCGAGATGGGGATGGAGAACCCGCCGCTCCGGTGGCCG  
 CCGGGGTTCCGCTTCAGCCCGACCGACGAGGAGCTCGTCCTCTACTTCCTCAAGCGCCGG  
 ATCGCCACCGGCCGCCCCACCCCTACATCGCCGACGTCGACGTCTACAAGTCCCACCCC  
 TCCCACCTCCCTGGTAACCACTCCCCCCTCCTCCTCCCCGTCGTCGATTCTTCTCCT  
 GCACGACCTCACCGTGGAATCGTGTTGCCGGCGGCGGAGCAGAGAGGTCGGCGCTGCGGA  
 CGGGGACAAGCAGTGTTCTTCTTCAGCCGATGGACCGCAAGTACCCCAACGGCTCGC

GGGCGAGCCGCACCAACCGGCGAGGGCTACTGGAAGGCCACCGGGAAGGACCGCTCCATCT  
GCAACGGCGGGCGGGCGGGCACC GCCCTCGGGGCGCGCGGTGGGGAGCAAGAAGACCCTCG  
TGTAACACCACGGCCGCGCCCCGCGGGGAGCGCTCGGACTGGGTCATGCACGAGTACA  
CCCTCCTCGCCGACGCGCTCCCGCCCGCCGCGCGACCGCGAGGCGTACGCTCTGTACA  
AGCTGTTCCACAAGAGCGGCGCCGGGCCAAGAACGGCGAGCAGTACGGCGCCCCCTTCC  
GGGAGGAGGATTGGCTCGACGACGACGACCACCACCACGACCAGCTTCCTGCTGAGGCGG  
CTCTTCCGGCTCCAGCCACAAGTAGTGGTAGAGCTGCAACAAGTGGAGGAGCATGCTGACT  
TTGAGCTTCCGGGTGGGGATCTTGATGTGCTCCTTGCGCAAATTGAAAATGATCAGGATA  
TAATCGAAGCGCAATTGGATTTCTCAACTCATGTTACTTCCCAAGTTCAGATTCAGCATC  
GTGTTTCATCAAGGTTGGCTCAGTGATGATGGCGGAAAATCAGATGTTGCGGATGCTACGA  
CTAGTGGCAGTGCTTTGTTGATGGCAGAGAATACGTGCGCTGAACTTCCAATTGATGGTC  
TCGAGCAACTTCTGATGCAAATATCGGATGATCAACAGACAGTTGAAATGCTCTCTGGTT  
TCTCAGCATCCGTTCCCCAATCGCAGCTTCAACATGATTATCATCAGGGTTGTCTTGGTG  
TTCATAGGGAGGAGGTTGGTGTGTCAGATTCTACCACTGTTAGTAGTGCTGTGGTGACAG  
AAGAATGTACTGTCCGTGAGCTTCAGGATATTGAAGGGCTTCTGATGCAAATAGAAAATG  
ACCAGGAAAAATGCCGAATCACTGCCAGATTTCTCCACACCAGTTCATCTCCATGATTGTC  
ATCAGGTTTGTCTTAATTTTGCACTTTATTTTGTACTAGTTCATCATGTAGAGTATGTGT  
AATTTCTTCTGCATTTGTGCTCATACAATTTTTTCCAATCCAAGTTTTGAAAGACACAAT  
AATTTAGATGTCTAGTCCACACCTTGGGAACATGTTATGTTCCCTAAAACCAAAAAACAT  
CATCCTAGGGATTGTAATTATGCTGTTACAATTTTTATTGCAATATGCTTAAGCTTTATTT  
GCTTGACCTTACTCAGGCCGCCTTCGGAGATTTTCAAGGAAGCCAGAGGGCTACATTCA  
ACATTGCAAACTTTTCTACTATGGTGCAGGAAAGCCCAAATTTTGATCTGCAAACTGGTC  
CAAGTAATCAAATTACTGAGTCTATTCTCACCACCGAGCCAATGAATGGAGAAACAAATG  
CTGTGGAAGAAACAAGTCCTCTGCGCTCTATGTCAGTATTGGGTAGTTATGATAGGCAGG  
ATGGTGATGATGAATTCCTTGAAATCAATGATTTCTTCGACCCAGAAGATTTAGAACAGA  
TTTTGGGCAGTACAAGAAGTCAGAACTTGATTCCCTGCTGATGATGGAGTGTGATAGTT  
TGCAATACTCTGATGCTCCAATGTTTCTGCCTGGTTCATTTGACAGAACTGGTGTGGTG  
CTGAAAACCATATGTTGAATTTGGTGCTAGTGGAATTCAGAACCAGGGATTTCAGCATA  
CAACTGAATTATTGGCACATAATCAAGTCGCTCTAAATGTGCGGAACCATATGAAGGACA  
ACCATGTTGTCTTCTCACATTTCATCAGGTGCTTAACAACGCCATTTTCAATTTACAAGCTTC  
TCTTATTATTACCCAAAATTATTTTCAAGAACTATACTGTCCAACCTCTGATTATTGTTTT  
CTCAATAAAAGGCAGCCAGCATGCCTCCTCTTTGTATGAAGATGAAGCATAATGCTGCAG  
AGGGTCCCAACTTCTAATTGAAACTACTATTACTTCTGAACATTGCAGATGCTACCATTA  
TTCATACAGTGAATGAGCAACCGCCTAACCGGAGTTCAAATGCTTCACAATCATGGTTCA  
ATGGGGCTCTATCTGCCTTGCTCGATTCTGTTCCCTAGCAGTCCAGCTATGGCTGCTGAAA  
ACATAGGTCTTAACAGAACACTGCAACGCATTTTCGAGCTTTAGGTCACAACAACCTGCAA  
GAGAAGAAGTTAGCAGTACTCTTATCAACACCAGAAGAAGAGGCGGTGGGCTAATTTTCA  
TCTCGTTAATGGTTTTACTTGTGCTATCATGTGGACCTTTAGCAATGGGTCTGCAGTCA  
AGCTTAGCAAGGGGTTATGGAAGTTTCCCTCTACATAATAGGATGCACCCGTTATCCTG  
GTGGCCAGTGCTTCTACTACTTCAAGTACTAATTCTTGTGTTTTGCTATCCTTTCTCTAT  
TCCTTTACATTGAAAAAGGCAACAATCTAGGAAAAATATTAGAGGATTATGTGGTGTAGC  
ACTTACTTTTCAAGATATTATGCGAGAGATGTTAAAAACAAAACAAAATGAGAAAAAGAAAC  
ATCTGAGGTGAACTTCTGGATGTTTTGTCTCATCATTTTGATGAAAGTATATATTGAA  
TGTAATTAACGATGATGGATTGTTGAGAAGTGCAGTTGCTGTGCACGATAAATGAAAAA  
TCCATTTTTGTTGCAAACTTGATTTTCCATATGTGGCTGCCCCCTATAAATGTGTAACAAAAA

ATGGACTACTGCTAGTTGATTTGCCTCATTAGAGTTGTATAAATATAAATTTAGACTCCA  
ATGATCCAATCGTCAAGTTTGTGCCCCA

CDS

> **ONAC042**

ATGGGGATGGAGAACCCGCCGCTCCGGTGGCCGCCGGGGTTCCGCTTCAGCCCGACCGAC  
GAGGAGCTCGTCCTCTACTTCCTCAAGCGCCGGATCGCCACCGCCGCCCCACCCCTAC  
ATCGCCGACGTGACGTCTACAAGTCCCACCCCTCCCACCTCCCTGAGAGGTCGGCGCTG  
CGGACGGGGGACAAGCAGTGGTTCTTCTTCAGCCGGATGGACCGCAAGTACCCCAACGGC  
TCGCGGGCGAGCCGACACCGGGCGAGGGCTACTGGAAGGCCACCGGGAAGGACCGCTCC  
ATCTGCAACGGCGGGCGGGCGGCACCGCCTCGGGGCGCGCGGTGGGGAGCAAGAAGACC  
CTCGTGTACCACCACGGCCGCGCCCCGCGGGGAGCGCTCGGACTGGGTCATGCACGAG  
TACACCCTCCTCGCCGACGCGTCCCGCCCGCGCGCGACCGCGAGGCGTACGCTCTG  
TACAAGCTGTTCCACAAGAGCGGCGCCGGGCCCAAGAACGGCGAGCAGTACGGCGCCCCC  
TTCCGGGAGGAGGATTGGCTCGACGACGACGACCACCACCACGACCAGCTTCCTGCTGAG  
GCGGCTCTTCGGCTCCAGCCACAAGTAGTGGTAGAGCTGCAACAAGTGGAGGAGCATGCT  
GACTTTGAGCTTCCGGGTGGGGATCTTGATGTGCTCCTTGCGCAAATTGAAAATGATCAG  
GATATAATCGAAGCGCAATTGGATTTCTCAACTCATGTTACTTCCCAAGTTCAGATTGAG  
CATCGTGTTCATCAAGGTTGGCTCAGTGATGATGGCGGAAAATCAGATGTTGCGGATGCT  
ACGACTAGTGGCAGTGCTTTGTTGATGGCAGAGAATACGTGCGCTGAACTTCCAATTGAT  
GGTCTCGAGCAACTTCTGATGCAAAATATCGGATGATCAACAGACAGTTGAAATGCTCTCT  
GGTTTCTCAGCATCCGTTCCCCAATCGCAGCTTCAACATGATTATCATCAGGGTTGTCTT  
GGTGTTTCATAGGGAGGAGGTTGGTGTGTCAGATTCTACCACTGTTAGTAGTGCTGTGGTG  
ACAGAAGAATGTACTGTCCGTGAGCTTCAGGATATTGAAGGGCTTCTGATGCAAAATAGAA  
AATGACCAGGAAAAATGCCGAATCACTGCCAGATTTCTCCACACCAGTTCATCTCCATGAT  
TGTCATCAGGCCGCTTCGGAGATTTTCAAGGAAGCCAGAGGGCTACATTCAACATTGCA  
AATCTTTCTACTATGGTGCAGGAAAGCCCAAATTTTGATCTGCAAAGTGGTCCAAGTAAT  
CAAATTACTGAGTCTATTCTCACCACCGAGCCAATGAATGGAGAAACAAATGCTGTGGAA  
GAAACAAGTCTCTGCGCTCTATGTCAGTATTGGGTAGTTATGATAGGCAGGATGGTGAT  
GATGAATTCCTTGAAATCAATGATTTCTTCGACCCAGAAGATTTAGAACAGATTTTGGGC  
AGTACAAGAAGTCAGAACTTGATTCCTGCTGATGATGGAGTGTGATAGTTTGCAATAC  
TCTGATGCTCCAATGTTTCTGCCTGGTTCATTTGACAGAACTGGTGTGGTGGCTGAAAAC  
CATTATGTTGAATTTGGTGCTAGTGGAATTCAGAACCAGGGATTTGAGCATACAAGTAA  
TTATTGGCACATAATCAAGTCGCTCTAAATGTGCGGAACCATATGAAGGACAACCATGTT  
GTCTTCTCACATTCATCAGATGCTACCATTTATCATAACAGTGAATGAGCAACCGCCTAAC  
CGGAGTTCAAATGCTTCACAATCATGGTTCATGGGGCTCTATCTGCCTTGCTCGATTCT  
GTTCTTAGCAGTCCAGCTATGGCTGCTGAAAACATAGGTCTTAACAGAACTGCAACGC  
ATTTGAGCTTTAGGTCAACAACCTGCAAGAGAAGAAGTTAGCAGTACTCTTATCAAC  
ACCAGAAGAAGAGGCGGTGGGCTAATTTTCATCTCGTTAATGGTTTTACTTGTGCTATC  
ATGTGGACCTTTAGCAATGGGTCTGCAGTCAAGCTTAGCAAGGGGTTATGGAAGTTTCCC  
TCTACATAA

Protein

> **ONAC042**

MGMENPPLRWPPGFRFSPTDEELVLYFLKRRIATGRPTPYIADVDVYKSHPSHLPERSAL  
 RTGDKQWFFFFSRMDRKYPNGSRASRTTGEGYWKATGKDRSICNGGGGGTASGRAVGSKKT  
 LVYHHGRAPRGRERSDWVMHEYTLADALPPAARDREAYALYKLFHKSGAGPKNGEQYGAP  
 FREEDWLDDDDHHHDQLPAEAAALPAPATTSGRAATTEEHADFELPGGDLVDLLAQIENDQ  
 DIIEAQLDFSTHVSQVQIQHRVHQWLSDDGGKSDVADATTSGSALLMAENTCAELPID  
 GLEQLLMQISDDQQTVEMLSGFSASVPQSQLQHDYHQGCLGVHREEVGVADSTTVSSAVV  
 TEECTVRELQDIEGLLMQIENDQENAESLPDFSTPVHLHDCHQAAFQDFQGSQRATFNIA  
 NLSTMVQESPFDLQTGPSNQITESILTTEPMNGETNAVEETSPLRSMVLGSYDRQDGD  
 DEFLEINDFFDPEDLEQILGSTRSQNLIPADDGVFDSLQYSDAPMFLPGSFDRGTGVAEN  
 HYVEFGASGIQNGFQHTTELLAHNQVALNVRNHMKDNHVVFSSHSDATI IHTVNEQPPN  
 RSSNASQSWFNGALSALLDSVPSSPAMAAENIGLNRTLQRISFRSQQPAREEVSTLIN  
 TRRRGGGLIFISLMVLLVAIMWTFNNGSAVKLSKGLWKFPST\*

#### Gene Structure

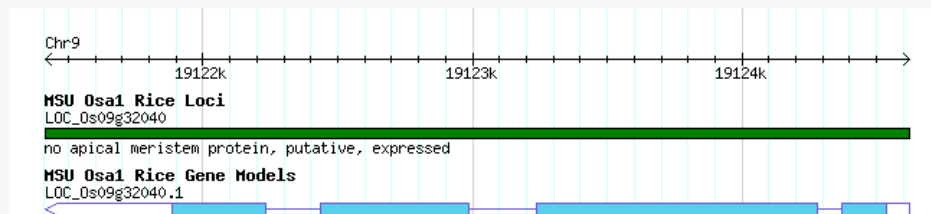

#### LOC\_Os02g06950 (ONAC043) sequence information

**Genomic sequence length:** 6635 nucleotides

**CDS length:** 1512 nucleotides

**Protein length:** 503 amino acids

Genomic Sequence

#### > ONAC043

ATGGTGGAGGCGAGGCTGCCTCCCGGGTTCAGATTCCATCCTCGAGACGACGAACCTCGTG  
 GTTGACTACCTCTCCGGCAAGCTCCGCTCCGGCGACGGTGGCGCGGCGAGCGGCGGCGGC  
 GCCGCCGGCGCCGGCTGCCCCGACGCCGACACTGATCGACGTCGATCTCAACAAGTGCGAG  
 CCATGGGACCTCCCAGGTATACATCCTGCATGATTTTGCTAGCTAGTAAATTGTCTTGAT  
 TTCTACCACATCACAAGCACTTGTAAGCTGTGTAATTATTGGTGGTTTAATTTAGCAGG  
 GTAAAACCGTTTGTCTTCTGATATAGTTTATAGATAGTTGTGTTGATTCTCGTTAACGTC  
 TGATTCTATAGGAGTTAAGACATTTTTTGGAGTTAATTACATGTTTTTGTATTCTCGT  
 TAACGTTTGATTCTATAGGATGCATATTTCCCTTGATTTTGTATTGGGCGTTGTAGCCTT  
 TTTCTGTATTACATTTTCTACTAAATGCAACGTGATGATAATGGTGGTGTGTCCATGCAA  
 GATGCACGTTATTTTTTTTTCTGATTACACGTCAGCTGCACTACACGACCACTACACAC  
 GTAGCACCACACTTGACCTCGCGAATGCACCTCGTAATACACGTTTAAAGAGATAAAAA  
 CCAGCGTCACATCCTCAATCTTATTAATAATCTTGCTGAAAGCATATCTCCATACACATAT  
 GGCTAATATTTTCGCTTATACTTATGTTTATCAGGTAAAATTTGAATTTTCAATCTTGA  
 ATTTGAAGCTGATTTTAGGTTTTTTTTCATTGAAGTTTATTTTTCAATCTTACTTTTAG  
 GTTGCTAAGAACATGTATATAAAAGTTTATTACAAAATTATTTTTTGTGTTGCAAATATG  
 ATGTTTGGCTTATCCACGAATAAGCCAAACGATGGGGCCGATAATATTCGTGAGCATCA  
 TAATTTAAATTTTCAATTTTCTATGTGTAAGATGAACATTAAGGTTTTCTTTTAGAT

AATGCATGTGATGCAAGTTTAGTAGTATTAGTTCCTCATGCATCTCGAAGCATGGTTGTT  
GAGGTGACCGATTCAACTCATCTCTAGCTCCATGAGCTGACCTAAATTCGATTTCAAAC  
TTATGTAGTATAAGTTGTTTCTTTTCTTTACCGTGACTAGACAAAGCATGATCGACAAAA  
GGTATTTTGAATTTATTTTCGATAATGCATTTTGAATTGGATTAACTCGATCGATCCA  
TGAAATTTTCAGAAGCTAGCTAGCTCACTAATTAATTTCTCATTTCTTTCCACTGATAAAT  
TAATCCACCTGAATTTAATTCTTCCACAATTAAGAACTACCTGAACCTTTTCTGTTTCGT  
AAGGAGAAACGTCTAGGGGTCTTCCGGCTAGCTTCACGGGGTGGTGGGCTAGATGACCTG  
AGACCTAATTATTTGATATTAGGTCATTCCCTAATATTTATATTTTTTTTTTCTGTTTCATG  
AGGCTATATGCAATCTAATTATCGAAAAATGTATCTATAATGAGAACAAAATTTACACGT  
CTCGCCTGCCTGCTTGTGACTCGTCGCCGTCTTCCTCATCACATCATATAACAGACTGA  
ATATTATTCCTTTTGCCGAGAGAGTTTGTGGCAGCTTCCTCTCTACCCATAGCATATC  
CTCCCGTTTGCCTGAACCTAGAGAGAACTGAAGATAGAGACTGTTGCAGAAAGCAAAG  
CCGCCGTTTGTGTTAAAAACATCCCTAGTGTGTGAGGTACCCAAAAAACATTGACCT  
ATATATAGCTAGAACTTCTTCATATATCCTAGCTAATTACTCTCACCATTCCAAAATAC  
AAGTATTTTTCAAGGATTTTCGAAAAATTTATACCACAATGTAAATATTTCTGACATTGAT  
TCTAATGTATGAAATCCATACATTTCCAGCCAATCAGACACGCTTCGAAGGGGATTCTA  
ATAAGCAATCCATATTTTTTTTAAAAATTGACCACCAAAGTGATTTCTTAACCTTAATATT  
TGCTAAACAACCTAGAAATACTTATATTTTTGAAACAGGGAAGTAGGTGCTAATAAACTC  
TGAATTAATAATTACTGTCCATTTTTTTTAGCTTCTCTTGCCTCTCTAACTAAAAATGATAAT  
ACATTAAATTATCAAATAATTATTATTACAAACGAAATGCATGTGGAGTAACAACTTGC  
ATTGGCTGTACATACATACATTCATGTAGAGATTGCTTGCATTGGAGGGAAGGAATGGTA  
CTTCTACAACCTCAAGGACAGGAAGTACGCAAGAGGGCAACGAACAAACAGAGCGACTGA  
ATCAGGGTACTGGAAGGCCACCGGAAAAAGACCGGGAGATAACCCGGAAGGGTCCCTGGT  
TGGCATGCGTAAGACGCTCGTTTTCTACAGAGGGAGAGCCCCAAGGGTGAGAGGACTGA  
TTGGGTCATGCATGAGTTCGTCGAAGAATTAGACCATGCCAATCACCATCATCATCTCAA  
GGTAATAATCAATTAGTGCTCAAAATCATTATACCCTCGTAAAGTATAAGCGTTTCTAAAT  
TGTTTAGCAAATACTAATGTTGGGGGAAATATTCCTTTTCCGATAACCACAATGGTTAC  
CTTTTAAATTTTGAATTACTTAGATTTCCCTCCCAAATACCTGTTAGGATGAAAAATAT  
ATTGCTTTTCATGTATTGGCATCAGAGCTTCTAAATATTTATATCGTTGAATAAATTTTA  
AATATATAAATTTCTTATATTTTTAGACGGACGTAGTATACATGCAAGATTTGGTTATAAT  
AATTGGTCGTCTTGGTTGGTGCCAGCATCACAATCAAGTGATCATGCAAGTGTTATAA  
TTAGTAAGTTTGTGTAGACGCAAAAGCATGTGGTTTTAGAATTCAAAGGGTATAATGAAG  
ATTCATGATGATTAAATAATTTGATCGCTTACCAGGTTCTTGCCCATAGATTTTCGTTTT  
CAGTTTGCACTTGACTGCATTATCAGTCACTCTCATGCCAGCTGGCAGCTAGACGTACGC  
ATCAGACATCTACTATTACTAGCAAGTCACTTTCAGATACATTCTACGACTAACTAGCTA  
GATGCATGCACAACTCTTCCTTCGTATACAAGATCTTTTTCTCTCCATATACAAGAATAA  
CACAGATTAATTATTCAGTACATTGTATGTGCAATAATTCAGAGAACTGAACCTGTACTG  
ATTGTTGCCATTAATTCTTTCAGCATCTTCTCTTGCTCGGGTTGATTAACCTTCTCATTT  
ATTACTACCTGACATCATCTTGCACACGCTGCATGTGAATTTTTTTTTTTGTGATTGATC  
AATAGTTTCAGTACATGCAGGAGGGTTGGGTGCTGTGTAGGGTTTTCTACAAGAGCAGGAC  
AGAAGCTGTTGCAGCACCAACAATGGAGTCTACTCTTCCTCCTCGTTACATCAATGGCGG  
CACATCAAGATCTCCATTGCCACCCCTCGTTGACAGCTCGATCTCCTTCAATCATGGAGG  
TTATGAGGAAGTTCTTCCCTGCTTCTCTAGCTCTCATCACCAGCAGCCATCGCCGGCGTC  
GATGAACGCGTCGGCTGCTGCTGATGATGATCAAGATTATCACCACCTGTCTGAAGGGCA  
GCGGCATTATTCAGACAAGAAGATGATGAGAGATGTGCAGAATGATCAGGTGACTACTAG

GTTTGATGGCCACCTTGCAGTGAAGAGGGAGATGTCTCTGAAGAAGGATTTGTCTGAAGA  
CGAACAGGTCGAGGATTACTACTGTCTAACTGACAATGGATCTTCAGAAACATGGAACCT  
TTTCCAGCAGTAGATTTACTCAACCATCGTCATTGAAAAAAAAAATCATTGGTAGTACT  
TGGAGTAGTAATTTTTTAGTTGGAAATGTAACAAGTAGTATAGACAGAAAATGCCTTTGA  
GAAATGGTTAGGTGTGAGATCGATGATCAGTAATTCAGTATGTGTGTACAAGCAATCTGG  
AGTAGATTTTAGTTATACTCGAATTGTCAAACATCTCATGATATTTCTTTTGGGCATCGC  
TAATGGGCGGGTTATCGCCCCATCCCTCCCCTAACACACTCCTCTCCCCCCTTCATCCTC  
CCCTTATTCTCTTTCTACTACACCATAAAATTTTTAAAAATAAAAAAACAAAGTTAGAAAA  
AAAAATAAAAAATAGAAAAAAATATAACTCTTATTTATGTGCATAGACTCTATACTTA  
TGTATAGACTTTTATACCATAAACTTCGCACGTATAAACTTTATGTATAGAAATATTATAT  
ATAAAAAATATTTAAATTCAAATTTAAATTTGAATCGGGTATATAAACTTTTGACTTATAA  
ACTTTGGGTCTATAAAATTTTAGGTGTATAAACTTTAGATGTATAGAAATACTCCTATATA  
TAAAAAATATTTGAATTCAAATTCAAATTTGAATCAGGTATATAAACTTTTGACTTATAA  
ACTTTAGGTGTATAAACTTTAGATGTGTAAACTTGATGTGTACAACTTTAATTGCATAA  
ATTTATTAAAAATAGAAAAGTAATGCGGTGAAAAAAAAAAGAAACCACGTTGAGGAGGAGG  
CTGACCGCGCGGGGCGAACGATCGCCATTAGGATTTTCGAATTCCTTTCTCTTTTTTTA  
TCCTCTTCTCCCTTTCTTTCTCTCGTTATAGATGGGATCATATATTCTACCAAACACGCA  
ATTAAGTGAGCAAGGTGGCAAAAGGCCTGGAATTGCATAAGCGCATTTTTTCCCGCCC  
GGCCCAAAAGATGTGCCTTGGGCCTGTGTACCGGTTGGGCCTTAGGCCAGCTCGTTTCG  
TCGAGAGGAAAGCGCCACGCAACGAGACCACGATCTGATGGGCCCTCACGCGCTTAGGCC  
TTTCGTTGCGGAAACGGCGGCCACGTGAAAGCGAATGTGCTGCCGTGCCGTGCAGTGTG  
ACTGGATTAAGCATGCAAACTCCCATTGGACACTTCTATCTGCTGCACCCAGGGACGT  
AGCTTGATTTTTTTTCAGACCTAGAACTATATACCAGTGTAATTTACATAATTTTATCT  
TTATTCCTCTATATTTAAGGTTTTGAATGTAATTTGTAATGGACTTTAGGCTCAGGAGT  
AGAGCTGCAATCCGCTCATTGTCTGCACCCCTAAACAAGGCAGTAGCTACTACACCTCCG  
TTCCAAAATAAGTTATTCTAGTATAATATCTTATATTAATAAAGCTATTTATCTACTT  
ACCATCTCCTTACAACATAATCATTTTTTACCTATTTTCTTAATAATCGTGTCCGCTAAAAA  
AATCTTACATCTTGGGAAAGCGGTAGTAGTTAGTTGAGGTTGATAAGAGTGAAATCCAT  
ACACATGAAAAAAGGGCATAGATAGTGCTGTAGTTATGGCTTTATCAGCATATGATTTC  
ACCCATCAAAATTTAAATCCTGGTACCTACGTACATGACATAGGGGCATTTGCAATTGAA  
TATCAGTGAGCTTAAGCGAACTGAGCGTAGCTCAACTGGATGGGTTTCTTGTGGTGAAAC  
CTGCCCCTCGGGTTCAAGTTCTAAACTTGGAACGAGTGCTCGTATTTACAGTTTTTTTT  
CAATGGTAGGTGATGTACCTGTCGACAGTAAGACACCTGTGATAGCTTCGTCAATCTTAA  
AATATATCGATGCTGCTGAAGCTAAAGCGATAATTCGAGGAAATGATCTCGCATTAGGT  
TCTAGGTGAATTATGACCATTTAAAAAGAAGGGGATTTGAGCCTAGCATTCAAAATATGCA  
ATGAAAAAACAATGTCAGTAACTCAGTATGCTAGATAGGCTATACTCAAAGGTCTAGCC  
CTGTGCATTGTCCTGCTTTGATTGCTAACAACAAAAATTTCTCTATTTTAGGCTGCACCC  
AATGCTGACGAGGTGGTTTCTCAATTCTTCTTAAATATTCTGTGTCCAAGATGACCAGT  
CTGATGAAACCCATACAGAGAAAGTCAGAAAACATAAGACTGACATAGAAAGTGGAACCT  
GGTTTCCTTAATGCCAAACAAGTAGGTAATTGTTTTTTAAGAAGGCCTTTTAAATAAACA  
TTGAATGTAGTTATTCATATTGTCATGATTTATTTGCTTGTGTTGTTATTATTTGCAGTA  
TTTCAACACTTCAAGAGTTTCTGAATCAGAAGAAGGAGGCGATCTTGAAAAGGTGCGAGA  
TCTTACCAAGCTTTTGCTTCCTAGCAGACTGGGAAGCGCTGTGTTTCAGTTATGCCTAG  
AGCACTTGATCAAAAACCAAAAGTAGGGATCTCATGGGATGGAATCTGGGAGCTAAGTG  
ACTGGGAGGTAGCAGACAATGAGGTTGTGCTGAAAAATGGTTGGCCAGTGTCTGCTCCTG

CTGATTCAAAATCAAAGGATCTTAAAAGGTTATTTGACCTCTTGCCTCCATATTATGACC  
 AAGAAGGAAAAAGACCCCATCTATTCTTTGAGCATTGAAAGTTTGATTTCACCTGATGTGT  
 TAAAAACTATTGTGACTGACGCTAAGTGGGAATGGTTTTGGAAATACTTACTGAATCATG  
 TGTTTGTAAATGCCACCCACTGGAAATACTTACTGA

CDS

> **ONAC043**

ATGGTGGAGGCGAGGCTGCCTCCCGGGTTCAGATTCCATCCTCGAGACGACGAACCTCGTG  
 GTTGACTACCTCTCCGGCAAGCTCCGCTCCGGCGACGGTGGCGCGGCGAGCGGCGGCGGC  
 GCCGCCGGCGCCGGCTGCCCCGACGCCGACACTGATCGACGTCGATCTCAACAAGTGCGAG  
 CCATGGGACCTCCCAGAGATTGCTTGCAATTGGAGGGAAGGAATGGTACTTCTACAACCTC  
 AAGGACAGGAAGTACGCAAGAGGGCAACGAACAAACAGAGCGACTGAATCAGGGTACTGG  
 AAGGCCACCGGAAAAAGACCGGGAGATAACCCGGAAAGGGTCCCTGGTTGGCATGCGTAAG  
 ACGCTCGTTTTCTACAGAGGGAGAGCCCCCAAGGGTGAGAGGACTGATTGGGTCATGCAT  
 GAGTTCCGTCAAGAATTAGACCATGCCAATCACCATCATCATCTCAAGGTTCTTGCCCAT  
 AGATTTCTGTTTTAGTTTGCACCTGACTGCATTATCAGTCACTCTCATGCCAGCTGGCAG  
 CTAGACTACATGCAGGAGGGTTGGGTGCTGTGTAGGGTTTTCTACAAGAGCAGGACAGAA  
 GCTGTTGCAGCACCAACAATGGAGTCTACTCTTCCTCCTCGTTACATCAATGGCGGCACA  
 TCAAGATCTCCATTGCCACCCCTCGTTGACAGCTCGATCTCCTTCAATCATGGAGGTTAT  
 GAGGAAGTTCTTCCCTGCTTCTCTAGCTCTCATCACCAGCAGCCATCGCCGGCGTCGATG  
 AACGCGTCGGCTGCTGCTGATGATCAAGATTATCACCACCTGTCTGAAGGGCAGCGG  
 CATTATTCAGACAAGAAGATGATGAGAGATGTGCAGAATGATCAGGTGACTACTAGGTTT  
 GATGGCCACCTTGCAGTGAAGAGGGAGATGTCTCTGAAGAAGGATTTGTCTGAAGACGAA  
 CAGGCTGCACCCAATGCTGACGCAGGTGGTTTCTCAATTCTTCTTAAATATTCTGTGTCC  
 AAGATGACCAGTCTGATGAAACCCATACAGAGAAATATTTCAACACTTCAAGAGTTTCTG  
 AATCAGAAGAAGGAGGCGATCTTGAAAAAGGTCGAGATCTTCACCAAGCTTTTGCTTCCT  
 AGCAGACTGGGAAGCGCTGTGTTTCAAGTTATGCCTAGAGCACTTGATCAAAAACCACAAA  
 GTAGGGATCTCATGGGATGGAATCTGGGAGCTAAGTGAAGTGGGAGGTAGCAGACAATGAG  
 GTTGTGCTGAAAATGGTTGGCCAGTGTCTGCTCCTGCTGATTCAAAATCAAAGGATCTT  
 AAAAGGTTATTTGACCTCTTGCCTCCATATTATGACCAAGAAGGAAAAGACCCCATCTA  
 TTCTTTGAGCATTGAAAGTTGATTTCACTGATGTGTTAAAACTATTGTGACTGACGCT  
 AAGTGGGAATGGTTTTGGAAATACTTACTGAATCATGTGTTTGTAAATGCCACCCACTGGA  
 AATACTTACTGA

Protein

> **ONAC043**

MVEARLPFGFRFHPRDELVDYLSGKLRSBGDGAASGGGAAGAGCPTPTLIDVDLNKCE  
 PWDLPEIACIGGKEWYFYNLKDRKYARGQRTNRATESGYWKATGKDREITRKGSLVGMRK  
 TLVFYRGRAPKGERTDWMHEFRQELDHANHHHLKVLHRFRFQFALDCIISHSHASWQ  
 LDYMQEGWVLCRVFYKSRTEAUAAPTMESTLPPRYINGGTSRSPPLPLVDSSISFNHGGY  
 EEVLPCFSSSHHQQPSPASMNASAAADDDQDYHHLSEGQRHYSDDKMMRDVQNDQVTTRF  
 DGH LAVKREMSLKKDLSEDEQAAPNADAGGFSILLKYSVSKMTSLMKPIQRNISTLQEFL  
 NQKKEAILEKVEIFTKLLPSRLGSAVFQLCLEHLIKNHKVGISWDGIWELSDWEVADNE  
 VVLKMGVQCSAPADSKSKDLKRLFDLLRPYYDQEGKDPHLFFEHLKFDFTDVLKTI VTDA



KWEFWKYLLNHVFMPTGNTY\*

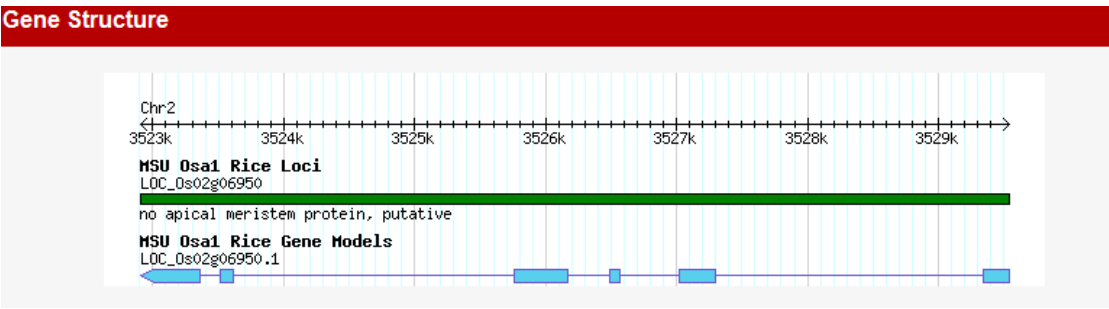

**LOC\_Os02g18460 (ONAC044) sequence information**

**Genomic sequence length:** 1512 nucleotides

**CDS length:** 1512 nucleotides

**Protein length:** 503 amino acids

Genomic Sequence

> **ONAC044**

ATGGCGGCGGCGGCGAGGTCGCAGGGTCTCTCGCCGGGGTTCAAGTTCAATCCGAGCGAC  
CAGATGCTCGTGAGCTCTTCTCCTGCCGTACCTGATCGACGGCGAGCTCCCCGTCCGC  
GGCCTCGTCTTCGTGGAGGACGACCCTGGGGGGCCTGCCGCTGCCGCCGTGGATCCTC  
CTCGACCGCCACGGCCGCGGCGACGAGGACGAGGCCTACTTCGTGCCCCGATGGGTGCC  
GGCGATGGGGCCCGGAGGTGCGTCCGTGCGCGGCGGCGGCAAGTGGGTGAAGCAGAGG  
TCGGAGGGGAAAGGTGAGGTGGTGGTGGCCCCCGGCGGCGAGGCGTTCTGTGGGAGAAT  
TTCAGCCTCAACTTCCACCGCGACGATCGCCGGAGCGGCAGCACCGGGTGGGTGATGCAC  
GAGTACATCGTCTCCCCACCCGCCGGTCCGCCGTGCGCGCCTCCACCGGGCCACCCAC  
ATCGCCTTACCGGCCACGGCCAGAACCAGCAAGCGCGTCCCCGACGGCTACGTCTCGTC  
CTCGACGACGCCGTCCCCCCCCGCCGCCGCGTGCAGCACCTCCTCCGGAATCCGAGCAG  
AGCAATCAAGAGGAGCAAGAATACGCTGCTTACACCGACCAAATCCAGCAGCAGTGCTTC  
GTCCCGGAGCAGCAGATGAGCAACCAGGAATACTTCCCGGAGGCGGCGGCGGAGCAGAGC  
AACCAACAGTTCTTCGTGCCGCGGAGGAGCAGAGCAGCCATCAGTTATTCTTGCCGGCA  
GAGGAGCAGAGCAACCAACAGTTCTTCATGCCGCGGAGGAGCAGAGCAGCCATCAGTTC  
TTGCCGGCGGAGGAGCAGAGCAGCCATCAGTTCTTGCCGGCGGAGGAGCAGAGCAACTAC  
CAACAGTTCTTGCCGGCGTTGGAGCAGATGACGCAGAGCAACCAAGAATTTGCTTACGGC  
GAGCAAAGCCAGTGCTACATTGTGCCGGAGCAGCAGCAGCTGAGCAACCAAGAATACGCT  
TACAGCGAACAAGCCAGTGCTACATCTTGCCGGAGCAGCAGCAGCTGAGCGACCAAGAA  
TACGCTTACAGCGAGCAAAGCCAGTGCTACATCTTGCCGGAGCAGCAGGAGCTGAGCAAC  
CAAGAAGCAGAATATGCTTTCGTCTGCTACGACGAGCAGCAGCAGCAGCAGCAACAGAGC  
AATCAAGAAGCAGAATACGCTTTCGCTGCTACGACGAGCAGCAGCAGCAGCAGCAGCAG  
CAATACTTACATGGAGATCTCACATCGTGGCAAGAACCCTTTGTGACGTCGTCGTCCTCG  
TCATCACAGCAGTTTCTTGGTCAGGAACAGCTGCTGCCTGATGGCCTCCTCCTCGACGGC  
TTTGGCGAGATCTCACAGCAGCAGGGCGACCAAGAATACGCGTACTGCGAGGAAAGCCAG  
TGCTACATCATGCCTGAACAGCAGCAGCAGAGCAACCAAGAAGCAGAATTCGCTTTCGCC  
TGCTACGACTAG

CDS

> **ONAC044**

ATGGCGGCGGCGGCGAGGTCGCAGGGTCTCTCGCCGGGGTTCAAGTTCAATCCGAGCGAC  
 CAGATGCTCGTGGAGCTCTTCCCTCCTGCCGTACCTGATCGACGGCGAGCTCCCCGTCCGC  
 GGCTCGTCTTCGTGGAGGACGACCACCTGGGGGGCCTGCCGCTGCCGCCGTGGATCCTC  
 CTCGACCGCCACGGCCGCGGCGACGAGGACGAGGCCTACTTCGTGCCCCGATGGGTGCC  
 GCGATGGGGCCCGCAGGTGCGCTCCGTGCGCCGGCGGCGGCAAGTGGGTGAAGCAGAGG  
 TCGGAGGGGAAAAGTGAGGTGGTGGTGGCCCCCGCGGCGAGGCGTTCTGTGGGAGAAT  
 TTCAGCCTCAACTTCCACCGCGACGATCGCCGGAGCGGCAGCACCGGGTGGGTGATGCAC  
 GAGTACATCGTCTCCCCACCCGCCGGCTCCGCCGTGCGCCCTCCACCGGGCCACCCAC  
 ATCGCCTTACCGGCCACGGCCAGAACCGBAAGCGCTCCCCGACGGCTACGTCTCTGTC  
 CTCGACGACGCCGTCCCCCCCCGCCGCCGCTGCAGCACCTCCTCCGGAATCCGAGCAG  
 AGCAATCAAGAGGAGCAAGAATACGCTGCTTACACCGACCAAATCCAGCAGCAGTGCTTC  
 GTCCCGGAGCAGCAGATGAGCAACCAGGAATACTTCCCGGAGGCGGCGGCGGAGCAGAGC  
 AACCAACAGTTCTTCGTGCCGCGGAGGAGCAGAGCAGCCATCAGTTATTCTTGCCGGCA  
 GAGGAGCAGAGCAACCAACAGTTCTTCATGCCGCGGAGGAGCAGAGCAGCCATCAGTTC  
 TTGCCGGCGGAGGAGCAGAGCAGCCATCAGTTCTTGCCGGCGGAGGAGCAGAGCAACTAC  
 CAACAGTTCTTGCCGGCGTTGGAGCAGATGACGCAGAGCAACCAAGAATTTGCTTACGGC  
 GAGCAAAGCCAGTGCTACATTGTGCCGGAGCAGCAGCAGCTGAGCAACCAAGAATACGCT  
 TACAGCGAACAAGCCAGTGCTACATCTTGCCGGAGCAGCAGCAGCTGAGCGACCAAGAA  
 TACGCTTACAGCGAGCAAAGCCAGTGCTACATCTTGCCGGAGCAGCAGGAGCTGAGCAAC  
 CAAGAAGCAGAATATGCTTTCTGCTGCTACGACGAGCAGCAGCAGCAGCAGCAACAGAGC  
 AATCAAGAAGCAGAATACGCTTTCGCTGCTACGACGAGCAGCAGCAGCAGCAGCAGCAG  
 CAATACTTACATGGAGATCTCACATCGTGGCAAGAACCCTTTGTGACGTCGTCGTCCTCG  
 TCATCACAGCAGTTTCTTGCTCAGGAACAGCTGCTGCCTGATGGCCTCCTCCTCGACGGC  
 TTTGGCGAGATCTCACAGCAGCAGGGCGACCAAGAATACGCGTACTGCGAGGAAAGCCAG  
 TGCTACATCATGCCTGAACAGCAGCAGCAGAGCAACCAAGAAGCAGAATTCGCTTTCGCC  
 TGCTACGACTAG

Protein

> **ONAC044**

MAAAARSQGLSPGFKFNPSDQMLVELFLLPYLIDGELPVRGLVFVEDDHLGGLPLPPWIL  
 LDRHGRGDEDEAYFVAPMGAGD GARQVRSVAGGGKWKQRSEGKGEVVVAPGGEAFLWEN  
 FSLNFHRDDRRSGSTGWMHEYIVSPPAGSAVAASHRATHIAFTGHGQNRKRVPDGYVLV  
 LDDAVPPAAAAAAPPPESEQSNQEEQEYAAAYTDQIQQQCFVPEQQMSNQEYFPEAAAEQS  
 NQQFFVPAEEQSSHQLFLPAEEQSNQQFFMPAEEQSSHQLFLPAEEQSSHQLFLPAEEQSNY  
 QQFLPALEQMTQSNQEFAYGEQSQCIVPEQQQLSNQEYAYSEQSQCILPEQQQLSDQE  
 YAYSEQSQCILPEQQELSNQEA EYAFV CYDEQQQQQQQSNQEA EYAFACYDEQQQQQQQ  
 QYLHGDLT SWQEPFVTSSSSSSQQFLGQEQLLPDGLLLDGFGEISQQQGDQEYAYCEESQ  
 CYIMPEQQQQSNQEA EYAFACYD\*

## Gene Structure

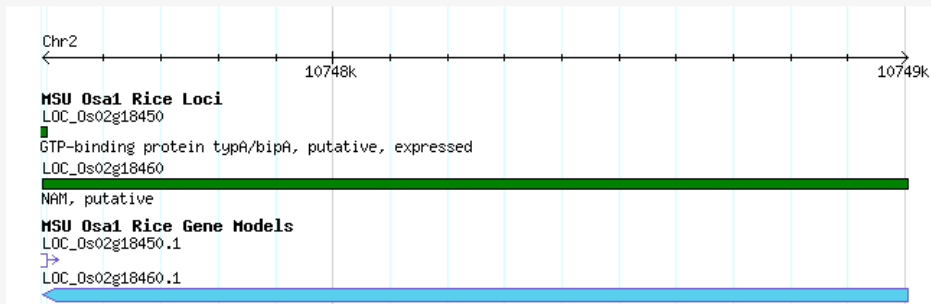

## LOC\_Os11g03370 (ONAC045) sequence information

**Genomic sequence length:** 1990 nucleotides

**CDS length:** 1080 nucleotides

**Protein length:** 359 amino acids

Genomic Sequence

> **ONAC045**

CATTATACCTTTATCCCCTTCATTTCTGTTCCATTTCTCATCCATCGCGCGTCGTCTCCA  
 CCTTTGTTGCTTGTGCCACCAAGCTATCTCCTCCTCTCTACTAGTGCTTCTGCTT  
 GCTCGATCAGCAGTGAGCTTCAAGCTAGCTAGCAAGCATGGTGGAGACTAGTACATCCCT  
 TGTGAAATTAGAGCAAGATGGCAGCTTGTCTTGCCTCCAGGCTTCAGATTCCATCCCAC  
 AGATGCGGAGGTAATCTTGAGCTACCTCCTGCAGAAATTCCTCAACCCTAGCTTCACCTC  
 CTTGCCAATCGGCGAGGTCGACCTCAACAAGTGGCAGCCATGGGATCTCCCAAGTAAGCC  
 TCAAGTCTCATATGCTTACATCCTTAATTCTTCTTCTCTCTAGAGTCTAGACTAGATA  
 GCTGTAGAGATGTAGATGCACAATTGCTTGGCTCTTGATGTTAATTTGTTTGTTCATGTA  
 TGAATCTGATTATTGATACAAATTAATTTGAATTGAAGGCAAGGCGAAGATGGGGGAGAA  
 AGAATGGTACTTCTTCAGCCACAAGGACATGAAATACCCGACGGGGATGCGAACCAACCG  
 AGCCACCAAGGAGGGATACTGGAAGGCCACCGGCAAGGACAGGGAGATCTTCAACCTGCA  
 GCCTACCAGCTATGGAGGCAGCAGCAACAAGAATAATAAGCAGCTGGTTGGGATGAA  
 GAAGACGCTTGTGTTCTACATGGGGAGAGCTCCCAAGGGCACCAAGACCAACTGGGTGAT  
 GCACGAGTTCCGTCTCCACGCCAACCTCCACAACGACAACCCGAACCTTCGTCTCAACCT  
 CAAGGTATTCACATTATATTATTTCTGTTTACGCAGCTTAATTAATTACTTGCTTAATTA  
 GCTAGCTAGCTAGATGTTTAATTATCTTGAACCTGACACAAATTGTGACCTGTTCTGACA  
 TTTTGGGGGGGTCAAGGATGAGTGGGTTGTGTGCAAGGTATTCCACAAGAAGGGAGACGA  
 TCGCGAAGCCATCAACAAGCAGCAGGCACAGGCTGCAGCTGTTGATCAGTACTCTGCCGG  
 AACACCCAACAACGGCAGCTCCGTGCAAGCCGGCGACGACGACGACTTGTTCAGCT  
 CGACTCCATCATCGACCCCAGCATCTACTTCAGCAACTCATCAGCTGCCAACATCTTGTC  
 GCGCGCCGCCAACATGTCCAATTCCGTGCTGCTGCCAACTACGGTGCAAGTACGACGAC  
 GACTGGTACTGCTAGTGCTGGTAGCTTCCAGCAGCAGCCAACTACTGCAGCTTGATCAA  
 CAAAAGCATCAGCAGCAGCAATGTCTCCTCTTGAATAATATGCCTCCACCTCCTCCTGT  
 AGCTGAAGGAGGAGTCCATGGAATTGGAAGCAGCTACAGCTTGCAGCACCAGGCAGCAAT  
 GGTGAAAGCCCTACGAGATGTCATTTCGTCTCCCAAATCCTCTTGGCATGCCGCAGTACAA  
 GTTAGATGATGCTTATCTATGGGACTCATCGTAATAGCTAGTGCTGCTGCTGCTGCTGCT  
 TAATTACGTGCTGAGAATTTTGGTGCTCGATCGGCTAGCTACGGCACTACTGAATTGAG

CATGTGCCTGGATACTTTGCATGGTCGTTTGGTCATCGAATTATTAGGAATATACTATAT  
 AGCTATACATTTCGTGCAATTTTGTGATTGCTTTGTGTTTAGTTTTGGTCTTCTGTACA  
 AAGATCATGACATTTTGTCTCGTGAGTTTCTTGCTGGTAATGCTGATTGATAGATGTTCT  
 CTTGCGGCACATATTTTGGAACTTGCTATATAAATACTCTAGCCTTTAATTTGGTGGCAT  
 TTGTGGATGAGACTTCTTCTGTTTGTCTTTATTGTGATCGTATATATTTTGTCTTTGTG  
 CACATGCTGCATTTTGTACCATGGTACATGTCACCTATTTCTTCATGGAGTAAATTGCAA  
 CATTGGTTGG

CDS

> **ONAC045**

ATGGTGGAGACTAGTACATCCCTTGTGAAATTAGAGCAAGATGGCAGCTTGTCTTGCCT  
 CCAGGCTTCAGATTCCATCCACAGATGCGGAGGTAATCTTGAGCTACCTCCTGCAGAAA  
 TTCTCAACCCTAGCTTCACCTCCTTGCCAATCGGCGAGGTCGACCTCAACAAGTGCGAG  
 CCATGGGATCTCCCAAGCAAGGCGAAGATGGGGGAGAAAGAATGGTACTTCTTCAGCCAC  
 AAGGACATGAAATACCCGACGGGGATGCGAACCAACCGAGCCACCAAGGAGGGATACTGG  
 AAGGCCACCGCAAGGACAGGGAGATCTTCAACCTGCAGCCTACCAGCTATGGAGGCAGC  
 AGCAACAACAAGAATAATAAGCAGCTGGTTGGGATGAAGAAGACGCTTGTGTTCTACATG  
 GGGAGAGCTCCCAAGGGCACCAAGACCAACTGGGTGATGCACGAGTTCCGTCTCCACGCC  
 AACCTCCACAACGACAACCCGAACCTTCGTCTCAACCTCAAGGATGAGTGGGTGTGTGC  
 AAGGTATTCCACAAGAAGGGAGACGATCGCGAAGCCATCAACAAGCAGCAGGCACAGGCT  
 GCAGCTGTTGATCAGTACTCTGCCGGAACACCCAACAACGGCAGCTCCGTCTGAAGCCGGC  
 GACGACGACGACGACTTGTTCAGCTCGACTCCATCATCGACCCCAGCATCTACTTCAGC  
 AACTCATCAGCTGCCAACATCTTGTGCGGCCGCCCAACATGTCCAATTCGTCGTCGCT  
 GCCAACTACGGTGCAAGTACGACGACGACTGGTACTGCTAGTGCTGGTAGCTTCCAGCAG  
 CAGCCAAACTACTGCAGCTTGATCAACAAAAGCATCAGCAGCAGCAATGTCTCCTCTTGG  
 AATAATATGCCTCCACCTCCTCCTGTAGCTGAAGGAGGAGTCCATGGAATTGGAAGCAGC  
 TACAGCTTGCAGCACCAGGCAGCAATGGTGAAAGCCCTACGAGATGTCATTTCGTCTCCCA  
 AATCCTCTTGGCATGCCGCAGTACAAGTTAGATGATGCTTATCTATGGGACTCATCGTAA

Protein

> **ONAC045**

MVETSTSLVKLEQDGSFLPPGFRFHPTDAEVILSYLLQKFLNPSFTSLPIGEVDLNKCE  
 PWDLPKAKMGEKEWYFFSHKDMKYPTGMRTNRATKEGYWKATGKDREIFNLQPTSYGGS  
 SNNKNNKQLVGMKKTLVFYMGRAPKGTNTNWMHEFRLHANLHNDNPNLRLNLKDEWVVC  
 KVFHKKGDDREAINKQQAQAAAVDQYSAGTPNNGSSVEAGDDDDDLFQLDSIIDPSIYFS  
 NSSAANILSAPPNMSNSVVAANYGASTTTTGTASAGSFQQQPNYCSLINKSISSSNVSSW  
 NNMPPPPVPAEGGVHIGSSYSLQHQAAMVKALRDVIRLPNPLGMPQYKLDDAYLWDSS\*

## Gene Structure

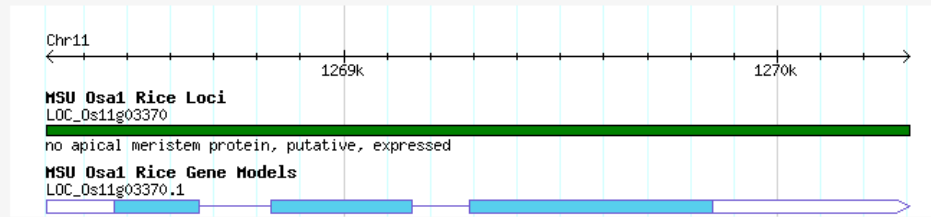**LOC\_Os02g18470 (ONAC046) sequence information****Genomic sequence length:** 1677 nucleotides**CDS length:** 1677 nucleotides**Protein length:** 558 amino acids

## Genomic Sequence

> **ONAC046**

ATGGCGACGGCGGCGGAGTCGCAGGGGCTCTCCCCGGGGTTCAAGTTCAATCCGTCCGTC  
 GAGCAGCTTCTCTGCTTCTTCTCCTGCCCCTACTTGCAGCACCGACGCCTCCTCGTCGAC  
 GGCGTCGTCTTCTCGACGACCCGGCGAGCGCGCCGCGTGGGCGCTGCTCCACCGCCAC  
 GGCCGGGGCGGCGAGGACGAGGCCTACTTCATCGGGCCGGTGCCCGCAGGTGACGGCCAT  
 GGTGGCCGGCGGCAGCAGCAGGTGAGCCGCACCGTCACCGGCGGCGGCGGCGGCAAGTGG  
 ATAAAGCAGAGGACGGAGCGGCCGAGAGGGGAGGAGGCCGGTGGTGGTGTTCGGCGGC  
 GAGACGTTCCGGTGGGAGGAGTTCAGCCTCAACTTCCACGCCGACGAGCGGTGCCGGAGC  
 GGCAGCACCGGGTGGGTGATGCACGAGTTCGCCGTCGTGCCCCCGCCGGCTCCCGCGTC  
 GCCGCCACCCACACCGCCTGCCGCATCGCCTTACCCGCCACGGCCAGAAGCGCAAGCGC  
 GTGCCGACGGCTACGTCTTCGTGACGTCCATGTCCAGACCGCCGCCGCCGCCGCCGCC  
 GTCGCTCCTCCGTTGCCGATGTTGTCTCGTACGGCGAACCACCGCACGAACACTTCTCT  
 GACGATCATCCGCCGCCGATTCTTACACTTATTACACCCAAGAATACCAGCAGTTCTTG  
 CCGGCGGCGGAGCAGAGCGATCAAGAACAGGAATACTGTGCACCGGAGCAGCAGAATTC  
 CAAGATTATCACGTCGCGGCGGCGGAGCAGACCGACCAAGATTACTTCTATACGAAATG  
 ATCAACCAAGAACAGGATTACGCATACCAGCAGCAGCAACAGCATCTCTTCCATGGAGAT  
 TTCTCGCGACTTCGCAGCAGTTTCTTGGTCAGGATCACGAGGTGATGTTCACTGGCCTC  
 GGTGGTGGTCTCGTCGTCTCCGACAACGGCGAGCACGCCTCCGCCGCCGCCGCCGCTACA  
 GAGCCGCCGGTGACGACGTGTTCTTGAAACTTTGGTGCCTGAGCCACCTGAAAATGCA  
 TATGTTGACGGAGCAGGGGAGTCCGCCATGGCATCGGCTAGCTCCGCTGGTGGCGCGCCA  
 TTATTGGAACAACCTTTGCGACGCCGCCGAGCAGTTTCTTGATCAGGAGCCGGCGCCG  
 GCTGGCCTCAACGACGGCGGCGCGATGATCTATAACAACAACGGTGACGGCGAGCACGAC  
 GCCGCGCCGGCTGCGCAGCCGCCGCCGGTACTACAGCGGGCCAGTTCCGGCAGTGGAC  
 AGCGTGTTCTTGACAAGATGCGGGAATATTTGATGGCTGATGCGAAGGGATTATGCCGA  
 ATTGATGCGCCCATCAACAATGGCGAACACGCCGCCGCCAGCGCCGGCTGCGGATGAT  
 CCGTTGGCTGCTCAGCACGGCCACGGCGACGCGCCGCCGCTGCCGGTGCCGCCGACGCG  
 GCGGAGCTAGAGCGGGTGGTCGGACATTTGTTGAGAGAAGTGAGGATATAATCAAGTT  
 GCGGCGCCGGTGGCTATGGAGGCTCGTCGGACAAGCCGCTCTCCGAATTTGACAAAGCA  
 CAAAACCAAATTCTGGCCAAGTTGATGGCAGTATTTAATCAAGTAGCCGAAAGTTAA

## CDS

> **ONAC046**

ATGGCGACGGCGGCGGAGTCGCAGGGGCTCTCCCCGGGGTTCAAGTTCAATCCGTCCGTC  
 GAGCAGCTTCTCTGCTTCTTCTCCTGCCCTACTTGACAGACCGACGCCTCCTCGTCGAC  
 GCGTCGTCTTCTCGACGACCCGGCGAGCGCGCCGCGTGGGCGCTGCTCCACCGCCAC  
 GGCCGGGGCGGCGAGGACGAGGCCACTTTCATCGGGCCGGTGCCCGCAGGTGACGGCCAT  
 GGTGGCCGGCGGCAGCAGCAGGTGAGCCGCACCGTCACCGGCGGCGGCGGCGGCAAGTGG  
 ATAAAGCAGAGGACGGAGCGGCCGAGAGGGGAGGAGGCCGGTGGTGGTGTTCGGCGGC  
 GAGACGTTCCGGTGGGAGGAGTTCAGCCTCAACTTCCACGCCGACGAGCGGTGCCGGAGC  
 GGCAGCACCGGGTGGGTGATGCACGAGTTCGCCGTCGTGCCCCCGCCGGCTCCCGCGTC  
 GCCGCCACCCACACCGCTGCCGCATCGCCTTACCGGCCACGGCCAGAAGCGCAAGCGC  
 GTGCCCCGACGGCTACGTCTTCTGTCGACGTCCATGTCCAGACCGCCGCCGCCGCCGCC  
 GTCGCTCCTCCGTTGCCGATGTTGTCTCGTACGGCGAACCACCGCACGAACACTTCTCT  
 GACGATCATCCGCCGCCGATTCTTACACTTATTACACCCAAGAATACCAGCAGTTCTTG  
 CCGGCGGCGGAGCAGAGCGATCAAGAACAGGAATACTGTGCACCGGAGCAGCAGAATTTC  
 CAAGATTATCACGTCGCGGCGGCGGAGCAGACCGACCAAGATTACTTCTATACGAAATG  
 ATCAACCAAGAACAGGATTACGCATACCAGCAGCAGCAACAGCATCTCTTCCATGGAGAT  
 TTCTCTCGGACTTCGCAGCAGTTTCTTGGTCAGGATCACGAGGTGATGTTCACTGGCCTC  
 GGTGGTGGTCTCGTCGTCTCCGACAACGGCGAGCACGCCTCCGCCGCCGCGCCGGCTACA  
 GAGCCGCCGGTGACGACGTGTTCTTGAAACTTTGGTGCCTGAGCCACCTGAAAATGCA  
 TATGTTGACGGAGCAGGGGAGTCCGCCATGGCATCGGCTAGCTCCGCTGGTGGCGGCCA  
 TTATTGGAACAACCCCTTTGCGACGCCGCCGAGCAGTTTCTTGATCAGGAGCCGGCGCCG  
 GCTGGCCTCAACGACGGCGGCGCGATGATCTATAACAACAACGGTGACGGCGAGCACGAC  
 GCCGCGCCGGCTGCGCAGCCGCCGCCGGTACTACAGCGGGCCAGTTCCGGCAGTGGAC  
 AGCGTGTTCTTGACAAGATGCGGGAATATTTGATGGCTGATGCGAAGGGATTATGCCGA  
 ATTGATGCGCCCATCAACATGGCGAACACGCCGCCGCCAGCGCCGGCTGCGGATGAT  
 CCGTTGGCTGCTCAGCACGGCCACGGCGACGCGCCGCCGCTGCCGGTGCCGCCCGACGCG  
 GCGGAGCTAGAGCGGGTGGTCGGACATTTGTTGAGAGAAGTGGAGGATATAATCAAGTT  
 GCGGCGCCGGTGGCTATGGAGGCTCGTCGGACAAGCCGCTCTCCGAATTTGACAAAGCA  
 CAAAACCAAATTCTGGCCAAGTTGATGGCAGTATTTAATCAAGTAGCCGAAAGTTAA

## Protein

> **ONAC046**

MATAAESQGLSPGFKNPSVEQLLCFFLLPYLQHRRLVLDGVVFLDDPASAPPWALLHRH  
 GRGGEDEAYFIGPVPAGDGHGGRRQQQVSRTVTGGGGGKWKQRTERPRGEEEPVVVFGG  
 ETFRWEEFSLNFHADERCRSGSTGWMHEFAVPPAGSRVAATHTACRIAFTGHGQKRKR  
 VPDGYVFDVHVQTAAAAAAVAPPLPMLSSYGEPPEHFSDDHPPPHSYTTYTQEYQQFL  
 PAAEQSDQEYCAPEQQNFQDYHVAEAETDQDYFYTEMINEQDYAYQQQQHLFHGD  
 FLATSQQFLGQDHEVMFTGLGGGLVSDNGEHASAAAPATEPPVHDVFLETLVPEPPENA  
 YVDGAGESAMASASSAGGAPLLEQPFATPPQQFLDQEPAPAGLNDGGAMIYNNNGDGEHD  
 AAPAAQPPARYYSGPVPVAVDSVFLDKMREYLMADAKGLCRIDAPINNGEHAAAPAPAADD  
 PLAAQHGHGDAPPLPVPPDAAELERVVGHLLREVEDIKVAAGGYGGSSDKPLSEFDKA  
 QNQILAKLMAVFNQVAES\*

## Gene Structure

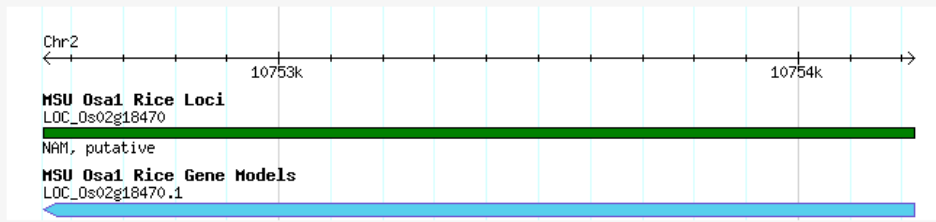

## LOC\_Os08g02160(ONAC049) sequence information

**Genomic sequence length:** 2573 nucleotides

**CDS length:** 1005 nucleotides

**Protein length:** 334 amino acids

Genomic Sequence

> **ONAC049**

```

AGGTCCTCATCGAGGCCGGCGTTGTCTAAGTTTTAACTACCCTAGCTAGCCTCACCAATT
GCAATTGTGTACACTAGCTAGTTGCATCAATCAATCTCACTGCTAGTGGCGTGCGTGCGT
GTGTGTCTAGTTAGGGCTACTTCTACTGCTGCTTCTCCTCAACCTCTTCTTCTTCTCCT
CTAGTTGCTCTCTCTGCTATAAAGTGCCGTGGAGATCAGGGGGTTGGGTACTGGAAGGTG
ATGAGAGTACTCAAGTTGATCGCCGGAGCAGCATCAGCATCAGCATCAGCTTCACCATGC
GGGGATCAGATCATCATCAGGATGTCGTCGCGGCACCGCGGGGCGGTGGCGGTGGAGGAG
ACGACGGGCAGGCGCACGACATGGTGATGCCGGGGTTCCGGTTCCACCCGACGGAGGAGG
AGCTCATCGAGTTCTACCTCCGGCGAAAGGTGGAGGGGAAGCGGTTCAACATCGAGCTCA
TCGCCTTCGTCGACCTCTACCGCTATGACCCGTGGGATCTTCCCGGTAAGATATTAATCC
CATCATCGTGACATGACATGAGGTCGAGCTTAGCTAGCATATGTGCTGTACATGAGCTAA
GCTAGCTAGTGGATAGCTAGCATCTGCATGATTTTCATGTGACCCCCCTCTTTGATTTTCATG
TGAACCTTTTTGGGTGGCTCACTTTTTTCCCACCTTCTTGTGCTCCCCTTACATGGATG
GATGCACCCAGCTCTGGCCTCAATTGGGGACAAGGAGTGGTTCTTCTATGTGCCAAGGGA
CCGCAAGTACCGAAACGGCGATCGGCCCAACCGAGTGACGCCATCGGGGTACTGGAAGGC
CACAGGGGCGGATAGGATGGTGAAGGTGGAGGGTGACCGTCCTATCGGCCTCAAGAAGAC
GCTCGTCTTCTACGTCGGCAAGGCGCCCAAGGGGCTTCGCAGCAGCTGGATCATGAACGA
GTATCGTCTCCCTCATGGCGACGCTGACCGCTACCAAAAGGTACTGAATTTTTTGGTTGC
TGTTTCAGTTTGATTTTCATGCTTGATTTGCTACTTCTTTGTGTGCATGATCCATCGAATTT
TATGAAGTTTGGGGATCCCTTGATTTGATGGATGCATCGAGCCCCCAAGATCTTGTAATA
GCTTAAAGTGTTGGATCCTCCGTCGATCTGAAAGATCGATATGCATCCACTCAAAAATTC
TTTTTCTTTTCGCTTTTGGAGATACATGATTGAACGCATGTTGATTGCTAGATAGCTTTT
GATATAGTCACCGGCAGGCAGGCAAGCATATGTAAGTCATATGCTATTGGCACGTCTTGT
CTCTCAGCTGGTGATGAAATTAAAGTACACACCATGCGAAAATTGTATGTAGAGGTAATG
CATGCAAGAATCTATAGCTATAGATCTTGATGGATCAATTAATTCTTGCATATATATAAA
CTTTTTGTACAAAAGGAGCACACTCAAATTTCAATTGTCCATTTTGTCTTCTCTATTG
AACTTTTCAGATCTGAAAAAAAAATGAACCTTCTCTATTAATTGATGAATTTAATCTGAATA
TTTCCGGGCGATGACTTTTCCCCCTGCAACTGGTAGGCGTCATCTTCTCCTTTTTTGA
AGCGATGCCTCATCTTCTTCTTAATTTTCGTTCTGTGTAAAGTTTCCAGCTTTTCATGAT
GTGCACGATCTGGTATATAACACTATAACCTACTAACCAACACAAAAAGTATACTCTGGT

```

TATTCTAAATCAAAATAAACTCCTAGAACAGCGAGACAGGACGAGATCTCGTTCTGTGAT  
 TACTATATATAATCGAACTATATTTTTTTACTACTAATTAATTCTTTCCAAAAAATTCTG  
 ATGGTTTGCCCAAAAAAATTCTGATAGTTTCTTTGTTTCTTTACATGTATATATATAGAG  
 AGAGAGCATATGAAACTTTCACATGTGTTTTACTATAATTTTCTTATGTTTTCTTTCAA  
 CACTTATGCTATTTCCATCAATCTCTCCTAGCTAGTACGTAATCGATGACCTAATATAAT  
 TGACTATATATCGTTGAATTATTCAGGAAATTTTCGCTGTGTCGAGTCTACAAACGCCCAG  
 GAATCGAAGACAACTTCCACCTCACC GG CACAACCACTAAATCCTCCGGCTCAAAGGCGG  
 CGGCGGCGATGGGCAAGAAGCACGCCGCCGGAACCGGACGTCATCGACGGCGGCGGCTG  
 CGGCGCCCCCGCTCGCCCCGATGTTTCGACGGCGGCGGCGGTGGCCAGGCACGGGCCACGG  
 CATCGGCGGCCAAGAAGCAGGCGGCGACGGCGGCGGCTGCCAAGCGCCGCCATCCGCGTC  
 GGCATCGACGGCCATGGAGCTTGACGGCGGCGGCGCATTCACCTCGTCTCGTGTGTTGCT  
 CTCGCGTTTGCCATCGGTGGTACGGGGCCCCGCTACCCACGGGTCCCCTGCGGGGGCGG  
 GGACGGGGGATATTTCCACCCGACCACCTGTGCGGGGTGAGGTGCGGGGGAGAAGTCG  
 GGGAGCAGGGCGGGGGCGTTCCAGTCCAACCCACCCCGTTGCCAACCTATAG

CDS

> **ONAC049**

ATGCGGGGATCAGATCATCATCAGGATGTCGTCGCGGCACCGCGGGGCGGTGGCGGTGGA  
 GGAGACGACGGGCAGGCGCACGACATGGTGATGCCGGGGTTCCGGTTCCACCCGACGGAG  
 GAGGAGCTCATCGAGTTCTACCTCCGGCGAAAGGTGGAGGGGAAGCGGTTCAACATCGAG  
 CTCATCGCCTTCGTCGACCTCTACCGCTATGACCCGTGGGATCTTCCCGCTCTGGCCTCA  
 ATTGGGGACAAGGAGTGGTTCTTCTATGTGCCAAGGGACCGCAAGTACCGAAACGGCGAT  
 CGGCCCAACCGAGTGACGCCATCGGGGTACTGGAAGGCCACAGGGGCGGATAGGATGGTG  
 AAGGTGGAGGGTGACCGTCCTATCGGCCTCAAGAAGACGCTCGTCTTCTACGTCGGCAAG  
 GCGCCCAAGGGGCTTCGCAGCAGCTGGATCATGAACGAGTATCGTCTCCCTCATGGCGAC  
 GCTGACCGCTACCAAAAGGAAAATTCGCTGTGTCGAGTCTACAAACGCCCAGGAATCGAA  
 GACAACTTCCACCTCACC GG CACAACCACTAAATCCTCCGGCTCAAAGGCGGCGGCGGCG  
 ATGGGCAAGAAGCACGCCGCCGGAACCGGACGTCATCGACGGCGGCGGCTGCGGCGCCC  
 CGCCTCGCCCCGATGTTTCGACGGCGGCGGCGGTGGCCAGGCACGGGCCACGGCATCGGCG  
 GCCAAGAAGCAGGCGGCGACGGCGGCGGCTGCCAAGCGCCGCCATCCGCGTCGGCATCGA  
 CGGCCATGGAGCTTGACGGCGGCGGCGCATTCACCTCGTCTCGTGTGTTGCTCTCGCGTT  
 TGCCATCGGTGGTACGGGGCCCCGCTACCCACGGGTCCCCTGCGGGGGCGGGACGGGG  
 GATATTTCCACCCGACCACCTGTGCGGGGTGAGGTGCGGGGGAGAAGTCGGGGAGCAG  
 GGCGGGGGCGTTCCAGTCCAACCCACCCCGTTGCCAACCTATAG

Protein

> **ONAC049**

MRGSDHHQDVVAAPRGGGGGDDGQAHDVMMPGFRFHPTEELIEFYLRKVEGKRFNIE  
 LIAFVDLYRYDPWDLPALASIGDKEWFFYVPRDRKYRNGDRPNRVTPSGYWKATGADRMV  
 KVEGDRPIGLKKTLLVFYVGKAPKGLRSSWIMNEYRLPHGDADRYQKEISLCRVYKRP  
 GIE DNFHLTGTTTKSSGSKAAAAAMGKKHAAANRTSSTAAAAAPRLAPMFDGGGGGQARATASA  
 AKKQAATAAAARRRHRPRRHWPSLQRRRHSTSSRVCSRVRWYGA PLTHGSPAGAGTG  
 DISHPTTCAGSGSGGEVGEQGGGVPVQPTPLPTL\*



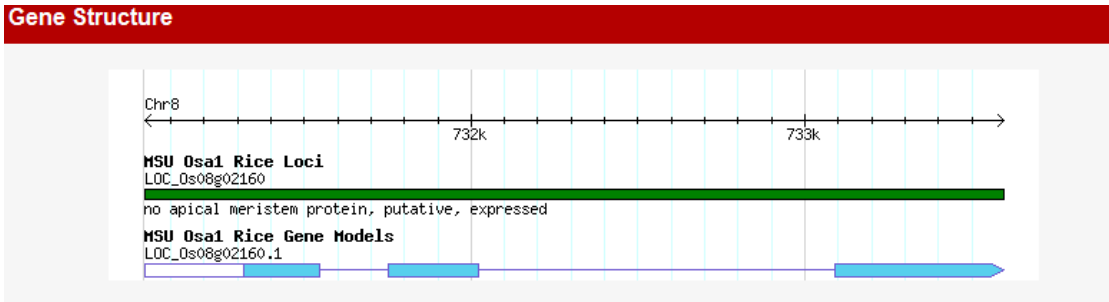

# **LOC\_Os02g38130 (ONAC050) sequence information**

**Genomic sequence length:** 3708 nucleotides

**CDS length:** 1182 nucleotides

**Protein length:** 393 amino acids

**Putative Function:** no apical meristem protein, putative, expressed

## Genomic Sequence

### >**ONAC050**

```

CTCTTGGGGAGCGCGTGTGGCTTGC GAAGGAAGGAGGAAGCGGAGCAAAGGCAAAGCAG
CAGCAAACCGCCATTGCGGCGGCAGGCAGCGCCCCGGAATCCCGGGGGGTTC AATAGAGA
GGGGGATAAGGGCGGAGGCGCGGTGTCGCTGGGGGGCGCATCCTCCCCCTCCCCGCGCCGA
TCGATCGATCGCCGCCGCCGCCGCTGCATTGGTCGCCGTTCCGAGGGAGGAGGAGCA
GCCTGCTTGGTTTCGGGAGGGGGTGGTCCCGTGGTGCCGCGTCTCGCTCGCGGTCGCGGAC
TCGCCGCTGATCGTGTTGGGGTCAGGACGCAACCGCCCGCGCCGCCATGGCGAGGTGACT
AGTGATATTTTCTTTCCCTATTCCTTCACCCATTTTCTGCTGTTGTTTTAGGGCTCG
TCTGATCGTTACCCGGATGGGGGTGGATGGTTTTTAATGGTTCAATGACGCGTCTCTTG
GTTCACTACTCCTCACATAGTAGTACTTGAATAAGTAGTAATATGATTTAAGTTGAT
GTAGGATATCACTTGGGCTCACAGCTCACGGTTGCTTGAACAGAATTTTACTGAAGAAAT
GAGAAAATCTTGGTGGGATTAGTATCATTTTAATTAAGAAATTAATACGCACCGAAATCG
AGCCAAAGAGGAATCAAATCTAGGTGGCACACACTCTTACCTACCCACAACCACAAGTGA
GCTAGGCTATGCATGCCAGGTTAATGGTCAGCTGCACTTGTTATTTGTGGTCTCTGTCAGA
GTGCATACCGCAATGTGGTCAGTGTATGGAGCTGAAATTTAGCTATATCACAAATTTGTT
TGCGTTCAGTGTGGAATTCGGTTTGTATGGTTCGAATTATGTAACTTCTTTGCTTGAA
ATTGCTCTGCATATTTGGTACATGGAACACAAAGCGTTACTGTCTGTAATTGTATCACCA
TTGTACTACATTGTTCAACCCATGGTTATGCGACTTCAGCTCAGGCACCCCCCCCCCCCC
CCCACACACACACACCAAAAAAAAAAACTTTTCAATCAAGGTTTTTCATTTAGAAAAGGGC
ATCAAAATGATATAGTACTCATCTTGCTATACATAGTTCACTAACAAGCAATGCTGAACG
GTCAATCGATTATGCACAAGTATAACTCCCCTAAGTCATGCGCATATACATCGTTTTATT
CTAACGTTGCAAGTTACTTTAGTAACAAATGCCAACATGCTTGTTTTGCTGCAGGTCTTG
GCTTATAACTGGTAGGGGAGTTGCTAAGAAAATAAGAAATGCACCTCATTGCTCTAGTCG
CCCAATAAGTGAATTGGGTGCAGAAGCACAGATGGAATGTCCAAACTGCAAACATGTTAT
TGATAACAGTGATGTAAGTATTAGTCTACAATATTTGTTGTCAACTATACACTTTTGTA
GTTCACTACTTTGAAAAATCGATATTCCTCTAAATTTTGGGGTATCCCATTTTCTGAAACC
TTCTTCTGGTACATGATTAATCTGTTGATTGTTATTTGTTACCAATAGTTGCAAAAAGGT
AGGTTATTGCTGATGAGAAAGGAGGTATGAGCTGACTGGGTTATCTTAATGGCAGAAATA

```

GGCATCATTTGCTCAGTTTCAGAGCCTATTGACATTGGGCTTTGGAATATAATGCATCCC  
 AGAATTTAATCACAGAATCTCTGCATGTGTAAAAGCAGTTGAAGTGTAACCTTAGCTTTC  
 AGCTCACATTGAATAGAAAGTTATGTGTTCTAATCAATATTTTGCTGAATTTCAATTCTATG  
 CAGGTTGCTATACAGTGGCCTGGGCTGCCTGCTGGTGTCAAGTTTGATCCATCTGATTTG  
 GAATTGCTTGAACATTTGGAACAAAAGATTGGCCTGGGGGGTTCAAAGCCACATACATTC  
 ATTGATGAATTTATTCCGACTATAGATAATGATGAAGGGATATGCTATTCACATCCGGAA  
 AATCTTCCTGGTATGGACTTAATGTCTTGTGATGGCATATGGCTGTTTTCGAAGTTATTG  
 GTTTATCCATGTTATTTACCAAAAATCTTATTTTTGGCCAACAGGTATGAAGAAAGATGGA  
 ACCAGTGGTCATTTCTTCCATAGAGTTTCAAATGCATATGGTTGTGGTCAGCGCAAGCGT  
 CGAAAGATCAGTAACCTGTGATCATGTTGTTTCTGTTGAACATGTGAGATGGCACAAGACA  
 GGGAAATCCAAAGCCATAGTTGAAAAGGGGGTTACAAAAGGTTGGAAGAAAATAATGGTT  
 CTGTACAAGAGTTTCAAAAAGAGGTGCCAAACCTGATAAGGCTAACTGGGTGATGCATCAG  
 TACCATCTTGGGGCAGAAGAAGATGAAAAGGATGGGGAGCTTGTTGTCTCCAAAATCTCC  
 TACCAGTTGCATGGAAAACAGATAGACAAGTCTGAAACAGGAAATGCTGATGAAGAATCT  
 GATGCATTTGCTGCAAGGGTTGGTCCAAAACTCCAAAGTCAAACACCCACAGCCATGT  
 CGCTTAAAAAACAGTCCATGTGAAACAGAAAATTACGATCCCATCTTGGAGGACCAGGTA  
 ATGTACATTACTTCTGTTATCATTGATGCAAATGAAGAATTGAAAGCCAATTTGGTCAGA  
 ATTTGGGTAACCACTGAAGCAGGAAAACATTTTATAATCTGGTTTCAGATCTGCACTCAAC  
 GGATCACTAAAAATAACTCGAACTATAACTGTAATCCTTAGGTTATTTTAGTTTTGTATA  
 TTATTGTTTTCAATGGAGTATCAAACCACTACTTTCAACATTCTGGAAAGTTGTATGCTT  
 CCCTTTTGAGAGATGATGAAAAATGACATATCTAAGCATCGATGATATTTTGTTTTGCTG  
 TATTTGTTTCATCATTTGAAAATATTAATTTTGTTCTTTGATTTGCGAATTATTATAGGAC  
 GAAGAGGAGTCTAACATACCTATTGTTAGCCTGAAGGATGATGCTGGGAATCCTGCGTGG  
 TCGCTGGAGAAACCCAGGCCGCGAGGGAAGCAGTTCAGGCCTGTCCTAACTTGGATGAA  
 TCCCTGCGCTGTCATGAAGTTCTGGATTCCCTTCTATCATGAAACGTTGCTTCCTTCTGAC  
 CGCCAATTCTGTCCCAAGCGGGAATGAGATTCTTGACAGGAACCTGAATGCGGTGTAT  
 GGACTACCTGATCTCTACAATGTAGACCTTGGAACACCTCCAGATTTTCAGCTTGCTGTA  
 AGTTTATCCCGTGGCTCTCTTGGTGCCCATATGTCTGCCAATTCTGATCCTGCCTCGT  
 TTTTCTGTGTTGTGACAGGATTTGCAGTTTGGATCACAGGAGAGCATTGGCAACTGGCT  
 GGATAGCATCTAGGTCGATAGAGAATTCGAAGTAAGGCGAAGAACTGCAGGAACCTTTTG  
 TGGGATCAAACCTGCATAGCTGAAGTCGTGCTGAACCATCAAACCGTCTCAGATAGGGTCA  
 TCTGAACCTCATATTTTGCCCTCAAACCTGGAAAGGAAATGTTATGTGATGGCTTGTTCGG  
 GGCCATGTAATGGTGGAAACCTCCAGCTATTTAACTCTATGGGAGAGCATGTAGGTGTGT  
 AGGTATGTCTTAGTTGCACTCTCTTTGTCACAACTTGCATATTTCTGTGGTTCCCTCCTAA  
 AAGATGATCATGAGAACCCATGCATTTCTATTGCCCATGGTTGAGCCA

CDS

> **ONAC050**

ATGGCGAGGTCTTGGCTTATAACTGGTAGGGGAGTTGCTAAGAAAATAAGAAATGCACCT  
 CATTGCTCTAGTCGCCCAATAAGTGAATTGGGTGCAGAAGCACAGATGGAATGTCCAAAC  
 TGCAAACATGTTATTGATAACAGTGATGTTGCTATACAGTGGCCTGGGCTGCCTGCTGGT  
 GTCAAGTTTGATCCATCTGATTTGGAATTGCTTGAACATTTGGAACAAAAGATTGGCCTG  
 GGGGGTTCAAAGCCACATACATTCATTGATGAATTTATTCCGACTATAGATAATGATGAA  
 GGGATATGCTATTACATCCGGAAAAATCTTCCTGGTATGAAGAAAGATGGAACCAGTGGT  
 CATTTCTTCCATAGAGTTTCAAATGCATATGGTTGTGGTCAGCGCAAGCGTCGAAAGATC

AGTAACTGTGATCATGTTGTTTCTGTTGAACATGTGAGATGGCACAAGACAGGGAAATCC  
 AAAGCCATAGTTGAAAAGGGGTTACAAAAGGTTGGAAGAAAATAATGGTTCTGTACAAG  
 AGTTCACAAAAGAGGTGCCAAACCTGATAAGGCTAACTGGGTGATGCATCAGTACCATCTT  
 GGGGCAGAAGAAGATGAAAAGGATGGGGAGCTTGTGTCTCCAAAATCTCCTACCAGTTG  
 CATGAAAAACAGATAGACAAGTCTGAAACAGGAAATGCTGATGAAGAATCTGATGCATTT  
 GCTGCAAGGGTTGGTCCAAAAAATCCAAAGTCAAACACCCACAGCCATGTCGCTTAAAA  
 AACAGTCCATGTGAAACAGAAAATTACGATCCCATCTTGGAGGACCAGGACGAAGAGGAG  
 TCTAACATACCTATTGTTAGCCTGAAGGATGATGCTGGGAATCCTGCGTGGTGCGCTGGA  
 GAAACCCAGGCCGCGAGGGAAGCAGTTCAGGCCTGTCCTAACTGGATGAATCCCTGCGC  
 TGTCATGAAGTTCTGGATTCCCTTCTATCATGAAACGTTGCTTCCTTCTGACCGCCCAATT  
 CTGTCCCAAGGCGGGAATGAGATTCTTGACAGGAACCTGAATGCGGTGTATGGACTACCT  
 GATCTCTACAATGTAGACCTTGAACACCTCCAGATTTTCAGCTTGCTGATTGTCAGTTT  
 GGATCACAGGAGAGCATTGGCAACTGGCTGGATAGCATCTAG

Protein

> **ONAC050**

MARSWLITGRGVAKKIRNAPHCSSRPISELGAEAQMECPNCKHVIDNSDVAIQWPLPAG  
 VKFDPSDLLEHLEHLEQKIGLGGSKPHTFIDEFIPTIDNDEGICYSHPENLPGMKDGTSG  
 HFFHRVSNAYGCGQRKRKISNCDHVVSVEHVRWHKTGKSKAIVEKGVTKGWKKIMVLYK  
 SSQRGAKPDKANWVMHQYHLGAEDEKDGELVVSISKISYQLHGKQIDKSETGNADEESDAF  
 AARVGPKTPKSNTPQPCRLKNSPCETENYDPILEDQDEEESNIPIVSLKDDAGNPAWCAG  
 ETQAAREAVQACPNLDESRLCHEVLDSFYHETLLPSDRPILSQGGNEILDRNLNAVYGLP  
 DLYNVDLGTTPPDFQLADLQFGSQESIGNWLDSI\*

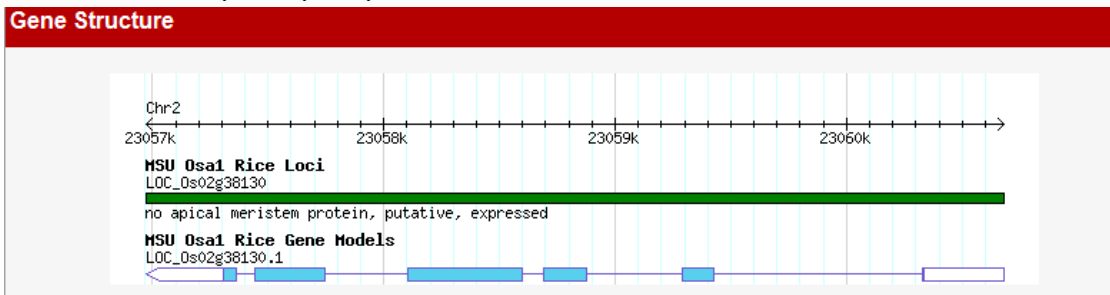

**LOC\_Os02g41450 (ONAC051) sequence information**

**Genomic sequence length:** 3087 nucleotides

**CDS length:** 759 nucleotides

**Protein length:** 252 amino acids

Genomic Sequence

> **ONAC051**

ATGCGTGTGTTTGTACTTTCCAAATTCATAGTAGTAGCGATTTGTGCGTATACGAATGCA  
 GAGGTGGCGAAGCTGACGGCGAGCGAGTGGTACTTCTTCAGCTTCCGCGACCGCAAGTAC  
 GCGACGGGGTCGCGACCAACCGCGCCACCAAGACGGGATACTGGAAGGCCACCGGCAAG  
 GACCGCGAGGTGCGCGGCTCCTCGTCGTCGTCGTCGTCGCGCGCGTCGTCGGCATGAGG  
 AAGACGCTCGTCTTCTACCAGGGGAGGGCGCCCAACGGCGTCAAGACCGGCTGGGTTATG

CACGAGTTCCGCCTCGACTCCCCGCACTCCCAACCCAGGGTACGTACGTCATACACATAA  
GCCGTGCGCCAACGCATTGAACTTATTTTGATCCTTATCACATTTTTTTATGTCCTCTAC  
ATAGATATAAGATTTGCTCCGATCCAATAAAAAATACCTCAAGATACCGGTATCTCACGG  
TACCAAATCATTTCGAATCGTTGGATCAAAAAATGCCCATCCAGATCAGCTAGATCCAATG  
ATCGGAAACGATTGGGTACCGTGAGGTACTGGTACCTTGAGATACTTTTTACTGGACCGA  
AACAAATCTCATATAAATATAGTCAGGTTTTCTTAATTAACGATGTAGAGATCGACATGT  
TTTTCTTAAGGAGTCTGTGGATAATATTACTTGAACATGCTAGCTAGGTATAGGTAGGTA  
GCACGTGAGTGTATGTTGAGTAACCACGTAGTACAATTGTAGGACTAATTAATCCGTTAC  
TTATCAATCGCACAAGCGACCCCCCGTGAATCACTAGATGGCAAAGAGGACCTCTCACA  
GGATGGAAATTAAGTTCATATGGAAGACAGTGATGCCAACTCGTCACAGTCGACAGGGC  
CATAATCATGCACGATGGATATGCTCAGAGAGAGCAAATAATTAGCATGCCCCACGCCG  
GCACGTGAATGTGGAGATACTTCCTCTTGCGTACGTAGGTAGTGCTAATTAAATAACAAT  
CAACAATCACGTAGTGCTAGTGTGCTCCTTAACAATCCAGGATATATCTGTACGGGGGTG  
GTACATTTGTGACCTCTCTGTTTCTCTAAAAAGAATTTTTTTTAAAAAAATCTCTACGA  
ACACTTTAACCCTAAGTGCCCTCGCCCTCATCATCCGCCCCGCCCTTTGACAGCTTAATAT  
CGCCATATCGGCATGCTAGTACTGCCACCTCCCATGCACGGTCCCACCCTTGCCATAGTAC  
TCTAGCTTGCTATATTGTCAGCAAATGTAATGCATGTTCCCATGCCACACTTCTTCCTCT  
TTGTTGGCACCCTTCCCCAGCTAGAAAGCACATAACCGCATTACCACCGCCGATCTCAGTTG  
CACCCCAATTGACCTGGCCTCCTTATCTTGTAACAAACAGGGAGCCTCGTCAACAAAAGAA  
CTAGGCATTGTCAATTGTTAAGAGCTAGCATGTGCAAAAAATATAGTCATTATACTATATT  
TAGGATGTGTTTAGTTCACGTCAAAAATAAAAAATTGATCGACTTTCGGATTATTCTTAT  
TCCCGGTTGGATTAAAATTAGAATGATATGACGGAAAAGCTAGAAAATTTGTGTGTAGTAA  
AGTTTTGATGTGATAGAAAAGTTAAAAGTTTGTGAAAAAGTTGGGAAGTAAACAAAGCC  
TTATTGTGTAATACACACGAGTATTTACTAATCAAGAGGACCAATAATTCCCTTGACTAG  
CTAGTGCTTGACCTGTCAAAGCCACGCGGTGCATCGGCGCATGTATCATGCATGCATGC  
ATGCATGGCGACGAACATTCAACGAACCAGAAGGAAGCACAGAGACAGCTAACTAAACAC  
TACAGCTACAGGACGGCAGTACCCAGTACACGCACGCGTACCCGGGCAGCCAGCTGCATT  
ATTTCAATTATTTGTTTCTGCCTGGGCTCATCGATATGATCTCTCCTCCCCTGATGGAGTG  
ACAGCACACTGTACACGCAAAGGACAAAAGCTCAAGCTCTCAAGAGTGATGGTCACTGTAC  
ATGCATCAATGTCTGCATGCATGCGACCACATATGCTGGCCCCCATGTACCCGTGGACC  
ATTCGTGCACACTGCACAGGCACAGGCACAGGCAGTGAGAGTGTGTGTGTGTGTGGACCA  
GGCGGCGCCCAATCGGCCATGCAGTATGCATCCAATGACAATTATTGGTGCATTAGTGCA  
CGATGTCTACTAACTCGATCATCTGCTAACTTCACTAGCTGTACTATGTGGTACTCCAC  
ATACGTACTGGCGTACTGCTGTCTCAGCTTGTGCATGGAGATGCCAAATTATCGCTAGTAC  
AGAACTTGTTATCCGTAACGACTCTGGCCGTGTAGAGGGTTTGCGGCCGTCACATGGTTA  
TCATCTCTAACGAGCCGAAACAAACACCCGTTAAAGATAAACTCGTATAGACATAATCTAT  
ATGCACGTTATTTTGGCCTGATAGAAATAACTGTCATCCTAACTTCTCATATCAGAGATC  
TTTCCTTAGTGACGGGAGCTCTTCCCGATAGAGATGAGGCTTGCCGCCGTTTCAGATGT  
CATATCCCGTGCTAGTGTATACGTGCTTACGTGCTAGTTAGTGCTAATAATTACTACCA  
TGCGTCTGCCTTTCATGTGTTTTGCAGGAGGACTGGGTGCTATGCAGGGTGTTCAGAAG  
AGGAAGGGCGACGGCGACGGCCCGCAGGACAGCGGCGGCGCCGCTCTCCCACCTTACC  
GGCTCGATGTGACGACGACGTTGTACAGCTACAGCCGCCGACCACCGCCGCCATGCA  
GCCGACGCGGCGGGCGGCTACTACGTGCGTTCCAGCAGCTGGCTGCTGGCTACGACTCC  
GCCGCCGGCTTCGCGAACCCACGCAGCCGGCGGTGCCACATTACCAATACGGCGGCGCG  
GTTATCGGGTTCCCGGAGGAGTTTCGGCGGCGGCGGGGTAGCAGACGAGTACGGGTTT

GGGACATACTTGGACTTGGGCTTCGAGCTCGACGACACGGCGAGTGTCTTGGAGGCATC  
AGGTCGTTCCCGCAGGGTTGGAATTGA

CDS

> **ONAC051**

ATGCGTGTGTTTGTACTTTCCAAATTCATAGTAGTAGCGATTTGTGCGTATACGAATGCA  
GAGGTGGCGAAGCTGACGGCGAGCGAGTGGTACTTCTTCAGCTTCCGCGACCGCAAGTAC  
GCGACGGGGTCGCGCACCAACCGCGCCACCAAGACGGGATACTGGAAGGCCACCGGCAAG  
GACCGCGAGGTGCGCGGCTCCTCGTCGTCGTCGTCGTCGTCGCGCGCCGTCGTCGGCATGAGG  
AAGACGCTCGTCTTCTACCAGGGGAGGGCGCCCAACGGCGTCAAGACCGGCTGGGTATG  
CACGAGTTCGCGCTCGACTCCCCGCACTCCCAACCCAGGGAGGACTGGGTGCTATGCAGG  
GTGTTTCAGAAGAGGAAGGGCGACGGCGACGGCCCGCAGGACAGCGGCGGCGCCGCTCT  
CCCACCTTCACCGGCTCGATGTCGACGACGACGTTGTCACAGCTACAGCCGCCGGACCAC  
CGCCGCCATGCAGCCGACGGCGGGCGGCTACTACGTCGGTTCCCAGCAGCTGGCTGCT  
GGCTACGACTCCGCCGCCGGCTTCGCGAACCCACGCAGCCGGCGGTGCCACATTACCAA  
TACGGCGGCGCGGTTATCGGGTTCGCGGAGGAGTTCGGCGGCGGCGGCGGGGTAGCAGAC  
GAGTACGGGTTTGGGACATACTTGGACTTGGGCTTCGAGCTCGACGACACGGCGAGTGT  
CTTGAGGCATCAGGTCGTTCCCGCAGGGTTGGAATTGA

Protein

> **ONAC051**

MRVFVLSKFIVVAICAYTNAEVAKLTASEWYFFSFRDRKYATGSRTNRATKTGYWKATGK  
DREVRGSSSSSSRAVVGMRKTLVIFYQGRAPNGVKTGWVMHEFRLDSPHSQPREDWVLCR  
VFQKRKGDGDGPQDSGGAASPTFTGSMSTTTLSQLQPPDHRRHAAAAAGGYVGSQQLAA  
GYDSAAGFANPTQPAVPHYQYGGAVIGFPEEFGGGGGVADEYGFYLDLGFELDDTASV  
LGGIRSFPQGWN\*

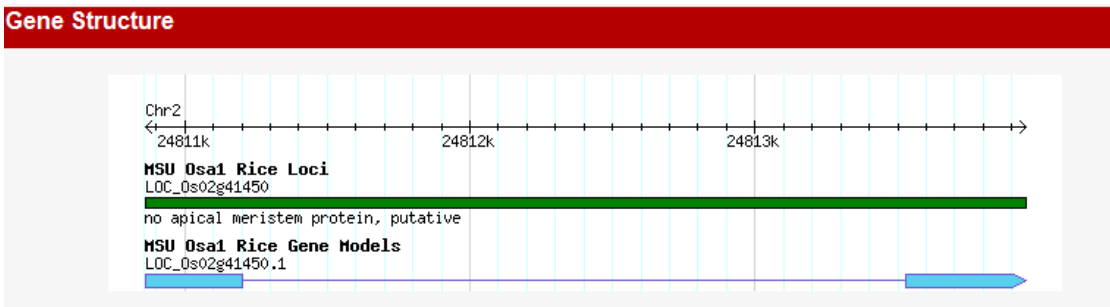

**LOC\_Os02g42970 (ONAC052) sequence information**

**Genomic sequence length:** 1480 nucleotides

**CDS length:** 1113 nucleotides

**Protein length:** 370 amino acids

**Putative Function:** NAC domain containing protein, putative

Genomic Sequence

> **ONAC052**

ATGGACACTTTTCTCCCATGTGCCACCTGGTTTCCGCTTTCACCCTACTGACGAGGAGCTC  
 GTCGATTACTACCTGAGGAAGAAGGTGGCATCGAAGAAAATCGACCTCGACGTTATAAAA  
 GACGTCGACCTGTACAAAATCGAGCCCTGGGATCTCCAAGGTAATTAGCATGCATGCAAG  
 TTGATCGAAGAATCAAAAAAATCAAAGTTAGGTTTGGCATTGAATTGAGCATCCAACATG  
 TACAAATATTGCAGAGAAGTGCAAGATTGGCATGGAAGAACAGAATGACTGGTACTTCTT  
 CAGCCACAAAGACAAAAAGTACCCGACGGGCACCCGCACCAACCGGGCCACGGGCGCCGG  
 CTTCTGGAAGGCGACGGGGAGGGACAAGCCCATCTACGCCCCGACGCTGCCTCGTCGGGAT  
 GAGGAAGACACTCGTCTTCTACAAGGGCCGTGCCCCCAATGGCCAGAAGTCGGACTGGAT  
 CATGCACGAGTACCGCCTCGAGACCAACGAAAACGGCACCACACCTGTATGCATATATTT  
 GATGTTTGAATTTGCTCCGGTCCAATAAAAAAGGTACCGTACCTTATGGTACCAAATTGT  
 TTTTATCATTTGATCTAACAATGCCACCCTGCTCAGCTAGATCAAACGATCAAAAATG  
 ATTTGGTGTGATGAGGTAAGTTGAGATATTTTTTATTGGATCGGAATAAATCTCTTGATG  
 TTTAGAATGAGATTCGGTCAAAATCCGCCTCATGCACCTAAGTCTGACTAAGTGGTTGAC  
 TGATCATTGGTGCCTGTAGGAGGAAGGATGGGTGGTCTGCCGGGTGTTCAAGAAGCGGGT  
 GCGGACGGTGCGGAGAATGGCCGACGGATCACCGTGCTGGTTCGATGACCACGGCGCCGT  
 CGGTGCGTTCATGCCGGACCTCAGCTCGCCGAGGCAGCTACTGCCGCACCACCACCACCA  
 CCACCCGGGCTCGTCGGCGGCGCTGTACCACGGCCACCACCACCAGCAGCTGCAGCAGAT  
 GTACGGTCACTGCAAGCCGGAGCTGGAGTACCACCACCTCCTGCCGCAGGAGGCCTTCCT  
 GCAGCATCTTCTCAGCTGGAGAGCCCCAAGCCGCCGCCGCCCTCCTGCGGCGGCGGC  
 CTACATTGGCGGCCACCTCGGATCGTCGTCGTCCACCGCCCTTACTACTCACGACGACGA  
 AGCCTCCGGCTCCGCCGCGCAGCAGCAGCCGCCGTGTTGGAGGCTGTTTACATGGCCGG  
 CGCCGGCGTCGGCATCGGCGTCGACGCGTCGGTGACGGACTGGAGGCTACTGGACAAGTT  
 CGTCGCGTCTCAGCTGCTCAGCAAGGAGTCCATGTCCAGCTACGGATCCCATCCGGCTCA  
 GGTGTTTCAGGCTGCAGACGGTGGCAAGCATGAAGAGGCTTTGGACTACGCTTCGACGTC  
 GGCCGGCTCCGGCGGCGGCGAGGCTGATCTGTGGAATAG

CDS

> **ONAC052**

ATGGACACTTTTCTCCCATGTGCCACCTGGTTTCCGCTTTCACCCTACTGACGAGGAGCTC  
 GTCGATTACTACCTGAGGAAGAAGGTGGCATCGAAGAAAATCGACCTCGACGTTATAAAA  
 GACGTCGACCTGTACAAAATCGAGCCCTGGGATCTCCAAGAGAAGTGCAAGATTGGCATG  
 GAAGAACAGAATGACTGGTACTTCTTCAGCCACAAAGACAAAAAGTACCCGACGGGCACC  
 CGCACCAACCGGGCCACGGGCGCCGGCTTCTGGAAGGCGACGGGGAGGGACAAGCCCATC  
 TACGCCCCGACGCTGCCTCGTCGGGATGAGGAAGACACTCGTCTTCTACAAGGGCCGTGCC  
 CCAATGGCCAGAAGTCGGACTGGATCATGCACGAGTACCGCCTCGAGACCAACGAAAAC  
 GGCACCACACCTGAGGAAGGATGGGTGGTCTGCCGGGTGTTCAAGAAGCGGGTGGCGACG  
 GTGCGGAGAATGGCCGACGGATCACCGTGCTGGTTCGATGACCACGGCGCCGTTCGGTGCG  
 TTCATGCCGGACCTCAGCTCGCCGAGGCAGCTACTGCCGCACCACCACCACCACCACCGG  
 GGCTCGTCGGCGGCGCTGTACCACGGCCACCACCACCAGCAGCTGCAGCAGATGTACGGT  
 CACTGCAAGCCGGAGCTGGAGTACCACCACCTCCTGCCGCAGGAGGCCTTCCTGCAGCAT  
 CTTCTCAGCTGGAGAGCCCCAAGCCGCCGCCGCCCTCCTGCGGCGGCGGCCTACATT  
 GGCGGCCACCTCGGATCGTCGTCGTCCACCGCCCTTACTACTCACGACGACGAAGCCTCC  
 GGCTCCGCCGCGCAGCAGCAGCCGCCGTGTTGGAGGCTGTTTACATGGCCGGCGCCGGC  
 GTCGGCATCGGCGTCGACGCGTCGGTGACGGACTGGAGGCTACTGGACAAGTTCGTCGCG

TCTCAGCTGCTCAGCAAGGAGTCCATGTCCAGCTACGGATCCCATCCGGCTCAGGTGTTT  
CAGGCTGCAGACGGTGGCAAGCATGAAGAGGCTTTGGACTACGCTTCGACGTCGGCCGGC  
TCCGGCGGCGGCGAGGCTGATCTGTGGAATAG

Protein

> **ONAC052**

MDTFSHVPPGFRFHPTDEELVDYYLRKKVASKKIDLDVIKDVLDYKIEPWDLQEKCKIGM  
EEQNDWYFFSHKDKKYPTGTRTNRATGAGFWKATGRDKPIYARSCLVGMKTLVIFYKGRA  
PNGQKSDWIMHEYRLETNENGTTPEEGWVVCRVFKKRVATVRRMADGSPCWFDHGA  
FMPDLSSPRQLLPHHHHHHPGSSAALYHGHHHQLLQMYGHCKPELEYHHLLPQEAF  
LQHLPQLESPKPPPPPPAAAAAYIGGHLGSSSSTALTTHDDEASGSAAQQPPSLEAVY  
MAGAGVGIGVDASVTDWRLLDKFVASQLLSKESMSSYGSHPAQVFQAADGGKHEEALDY  
ASTSAGSGGGEADLWK\*

**Gene Structure**

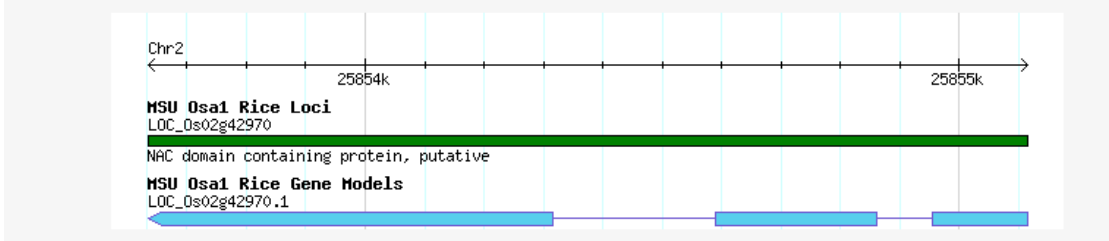

**LOC\_Os03g02800 (ONAC054) sequence information**

**Genomic sequence length:** 4559 nucleotides

**CDS length:** 1953 nucleotides

**Protein length:** 650 amino acids

Genomic Sequence

> **ONAC054**

GTTCTTCTCTCTCATGTGCCATTAGCCAATAGCATCAAGGTCTCCTCTCTTCTCCTCTCG  
ATCCTCTTCATTTTGTCTTACTTGACATTCTTGTAACTCATCTATGTGTTATTGT  
ATGTTGCAGGTTTTGTACATTGTAGCTGATTATAATTCATTCATATAGCTATTCAAACA  
AGTTCGGTGGCTGTCCACATTTTAGCTTTGGATAGCCGGCTTGCCAGCTGCCTGCCTAGC  
TCTAAGCATCTCTTGCTGTTGGAGTTTTGAGAGGAAGGCTAGAGGAAGCATATGGCGCCC  
GTGAGTTTGCCTCCAGGTTTCAGGTTCCACCCACCGATGAAGAACTAATCATCTACTAC  
CTTAAGCGGAAGATCAACGGAAGACAGATAGAACTCGAAATCATTCCAGAGGTTGATCTT  
TACAAGTGTGAGCCTTGGGATCTGCCTGGTATGTTCTTAGTTTGCTTGTCTAAAGATAT  
CTATTCCTAGTTTTATGTTGCTTGTGTTGGTGGTAGAAGTTAGAATGCTGTAGCCCATGCT  
AGGATATATATATTTCAATCCAACCCTAGGCCCATGCAGCTATCACCATTGGCGTTCTT  
ATATATCATCTCTTGCTATATAGGAGTAACAGTTTCTTTCTTTTTGTTTTAAGGGTAGG  
AATAGCAGTTTCATGATATATAATTTGTATGAGACTTTTGTATAAATGCTATAAGGACAA  
GTTTTAAGTTTATATGCATGTTAAATTCAGGTTAACAATTAAGTATAGGCAAGCATGCA  
CCTTTATTGTTCTCCAAGGAAAGCACATATATAGGTCCAGTATGTTTATTGGATGCCGTG

TTATGTAGACACTAAGCAATCTTATTCAATTCTTATACTATTATGCCCTCCCAAGAAACA  
CCAGTGCCCTACACTACTTGAGGAAAGAATAACCACATGTTCCCTTCTTGATGAGCACTTC  
ATCTAGCTATTTGTAGTTGAAATGTATGTAATAATAATCACTAATTAATCCTGGCTATAA  
ATGTGTAGCTCTATCTGTTGTTTTAGTTTTCTTTATTTTACATAAGTAGCTTTTATGT  
CATTTATGTCACAAAAGAAAAGGTTTCCATGATTAATTCGTAAATTTTGGTACATTTGAA  
TTGCTAGTTATATCAAAGCATATTTGATTTTTTTTCTCTTTATATATAAAAAATCAAGCA  
TTGTCAAAAAGCGATGTTTCACTGTCATAGCTTTGTGTGAAAACAAGATTAATCATACTGT  
GAAATTTGCTTTACTTTCAAACATCTTATGCACACCGAAAGGAGGGATATTGATAGATCT  
TGATCCTTTTGTCAAAAAGAAATTTACCTTCAAAAAGAAACGTCAAATTTCTGCCAAGTGT  
AAAGGTGACATTATATACGTCCATGCACTGAGATACTTGAAATGGAAAATAAATCCTTTA  
TATCAGTAACATCAAAGTTAAAGTTTATATATTTTGGACCATGTCACAATCACAGAGAGA  
TTTGAGGAAAAGATATATTCTCTCTTTATCCACTTGCTGTTTGCTTTCAAGCTTGACAGT  
TTACTACAAAAACACCATGTAGCATTCAACATTCTACGAAGCGAGTGCTGTAAAAATATC  
GAATAAAAAGAGAAAAATAAGATGAGCCTTTTTTCTTGGGGTGACAAAATAAAGCAAGAA  
ACTAAGAAAGGAACCTTGTTGATGAACATATAGGTCAAGAAGATGAACAAAAGTCCGCACAG  
CCTCCAAGAGATATAAAGTGACCTTGGTCTAATTTTCTTTTCTTTCAGCTATGGTGGGCTATCAT  
GTTAAATAGCCATATCTTAACTCTGTCATTAGATCCAATCATGATAGTAGACAAGTACTT  
CAATGTTTATGCTGCATGCATGATTATGTATGACTTTTTGTTTGTATGACACCCCCTAAC  
TGATCGTTCAATATTCAGAAAAATCCTTTCTTCCGAGTAAAGATCTCGAATGGTACTTCT  
TCAGCCCTAGAGACCGCAAGTACCCAAATGGATCAAGGACGAACCGTGCAACAAAAGCCG  
GATACTGGAAGGCAACTGGGAAAAGATCGAAAAGTGAACCTCACAGAGGCGTGCAAGTTGGTA  
TGAAGAAGACTCTTGTGTACTACCGTGGTTCGAGCTCCACATGGTTCTCGCACCGATTGGG  
TCATGCACGAGTACCGCTCGATGAGAGGGAATGCGGAGACTGACACTGGCTTACAGGTGT  
GTTACTATTAATCTTGTGCAATTTTTAAATCTACAACCATAATATATGGATAAACCATAT  
ATGTTATATTTAGCCCTTCTTTTCTGAAATTATAAACCTAGAGTAAAATATGTTACTAGC  
TGCTTGACATGGACGCGGCTCTGATATGCAACCTCTTTGCATTTGTGTGTCTATATGTA  
GGATGCATATGCTTTATGCCGGGTGTTCAAGAAGACAGCGCCCGGGCCAAAGATCATAGA  
GCATTATGGTGTGGTGCAACCACATGTCGAGCAACCTCAATGGATGACGAGCAGTATCGA  
TCGCTCCCCAACGTTGGACGTGTCGTGTGATGGAAGAGGTGATGACTTTGAGAGCAGCAG  
CTTCTCTTTCCCAACAGAGACGCCAATGGACTCCATGCACGGTGGGTTTGGAAATGCAGAT  
GAGTGCACCTCACGAGGATGGCAAATGGATGCAGTTTCTGAGTGAAGATGCCTTCAACGC  
CACCAATCCATTCTTGACGAACCCAGTTTCTGCCAACTTCTCATGCCTTCCATCCAAGGT  
ACATATACATATATAGTCAAAAAATGAAGGTTACTTACTGGTACAGATGACATGTATATTC  
AGGCAATGAGTTCTTACCGGTGCAATGATATTCATATGCAGGTGGATGTTGCACTGGAAT  
GTGCGAGGCTGCAGCACAGGCTCACCTTGCCCTCCCTTGGAGGTGGAGGATTTCCACAGG  
ACGTCAGCCTTGACACGAAGATTGGCATACTTCGCAGTAACCCCAACGAAGTTGACATTC  
TCCAAGAATTCCCTGTCAGTTGCGACTGCCTCTCAGGAGCTAATTAATGGCTCCACCAGTA  
GCTACCCTGAAATGTGGTTAGGAGCTAGCACAAGCAGTGCTAGCTACGTCAATGAACTGT  
CCTCTCTAGTTGAGATGGGCGGCGTTGGCACTTCTAACCACCACGAATCCGCAAGGCTAC  
AGGTCGAGATCGCTGACATGGAGGTGTTCAAGGACGAGAAGAAGCGGGTGGAGAACCTTA  
GAGGAGTCAAGTTGGTGAACAATGACCTTGGGGAGGTAATTGTTTGCATCATACCTATAC  
AAGTATATTCCCATCATTATATATACTACATCTCATGAGACTGATTACTTTCATGCTT  
CATTTGTCTCAAGCAGATTGTTGTAGAAGGAGATGAAAGCAATCCAACAGAAGACATCAT  
CGCGCAGTACCCTATAAAAGTCACTGCAGATAATTCAGGTATGTAATATTTAATTTTGGC  
TGTTTTACATGGGCTCCACAGAAGTAATTAGCAGTATTCATATTCGATACAGACTGTAT



ACAGATACAGTTCTTGCATGCACTAACTCAGAGCTAGATTGCAGGAGAAGCCGGTCATCG  
 CATGACCGATCCCACTGACGTAGGCGGCATCGACACTGCCCCGATCTTCTCGCAATCTCA  
 ACCTGACGACTTTGCTGCTGGTTTCGACGACGTCAACCCTAATGCATCTTTCGATCTGTA  
 CGAGAAGGTTGACGTCAACCACAGGCTATTTCGTTTCAAGGGTCGCTGCGGCGAAGACATT  
 CTTCCACCGCATTGAGCCATCGAAGAAGGTCAGCTTCCACTCGAACCCGGCAGCAACCGC  
 CGTCAGTAAGGCGACCGAGAAGTTCCATTTCCCCGTTACGACCAAAGTTAGTGGTAGGGT  
 TTCCATTTTTAGCAAGTTCAAGGCACTCATAAGGGACAAGTTCTTGATGATGAGGCCATC  
 ACATTACATACCAAAGGTTGGGCAGCAAAGAAACCACAGTGAATGAGCTGCTGCAGATTGT  
 GTCACTCCTTTTAGCACCGAAGCAAATCAATGGCTGCCCTACTGAGCAAGAGCTGGTCAA  
 GAAGAAGGCGAAAGAAGTGATGAAGCCGGGATGGGGTCGTGAAGGGAGCAACAAATTGTG  
 GCTTCCGCTCTCCAAAGGGAAGGGCATTTCAGCATGTTTTTGAGTGGGAAATGGACGTT  
 TCTAACCTCCGCGTTGGCCATCAGCACTCCAGCTGAGTGCGATCACTAAAAGGTCTTTTC  
 CATGACTGTCAATTAATGACACTACTGTTATATAATCTGCTATAACCTCAGTAGCGCGAG  
 CCTAGCTAGTGCATGAAGAGAAGGTTAACATTAATTAAGTGTCTTCGTGTCTCTGTTATT  
 AACTGGTGATAACTGGAGAATGTATGTCAATTAATTATTATTTGTTTCGTGCTCCATTCT  
 AAGTCTAACCTGTGTATCAAAAATACTATCGTTAATTTGTAAGTGCAAATACAGATGTA  
 TACATATATATACATGTAAACACACATAATGTTCAATATTAATTGTATTTGTTTCATT

CDS

> **ONAC054**

ATGGCGCCCGTGAGTTTGCTCCAGGTTTCAGGTTCCACCCACCGATGAAGAACTAATC  
 ATCTACTACCTTAAGCGGAAGATCAACGGAAGACAGATAGAAGTCGAAATCATTCCAGAG  
 GTTGATCTTTACAAGTGAGCCTTGGGATCTGCCTGAAAAATCCTTTCTTCCGAGTAAA  
 GATCTCGAATGGTACTTCTTCAGCCCTAGAGACCGCAAGTACCCAAATGGATCAAGGACG  
 AACCGTGCAACAAAAGCCGGATACTGGAAGGCAACTGGGAAAGATCGAAAAGTGAAGTCA  
 CAGAGGCGTGCAAGTTGGTATGAAGAAGACTCTTGTGTACTACCGTGGTCGAGCTCCACAT  
 GGTTCCTCGCACCGATTGGGTCATGCACGAGTACCGCCTCGATGAGAGGGAATGCGAGACT  
 GACACTGGCTTACAGGATGCATATGCTTTATGCCGGGTGTTCAAGAAGACAGCGCCCGGG  
 CCAAAGATCATAGAGCATTATGGTGTGGTGCACCACCATGTCGAGCAACCTCAATGGATG  
 ACGAGCAGTATCGATCGCTCCCCAACGTTGGACGTGTCGTGTGATGGAAGAGGTGATGAC  
 TTTGAGAGCAGCAGCTTCTCTTTCCCAACAGAGACGCCAATGGACTCCATGCACGGTGGG  
 TTTGGAATGCAGATGAGTGCACCTCACGAGGATGGCAAATGGATGCAGTTTCTGAGTGAA  
 GATGCCTTCAACGCCACCAATCCATTCTTGACGAACCCAGTTTCTGCCAACTTCTCATGC  
 CTTCCATCCAAGGTGGATGTTGCACTGGAATGTGCGAGGCTGCAGCACAGGCTCACCTTG  
 CCTCCCTTGGAGGTGGAGGATTTCCACAGGACGTCAGCCTTGACACGAAGATTGGCATA  
 CTTTCGAGTAACCCCAACGAAGTTGACATTCTCCAAGAATTCCTGTCAGTTGCGACTGCC  
 TCTCAGGAGCTAATTAATGGCTCCACCAGTAGCTACCCTGAAATGTGGTTAGGAGCTAGC  
 ACAAGCAGTGCTAGCTACGTCAATGAACTGTCCTCTCTAGTTGAGATGGGCGGCGTTGGC  
 ACTTCTAACACCACGAATCCGCAAGGCTACAGGTCGAGATCGCTGACATGGAGGTGTTT  
 AAGGACGAGAAGAAGCGGGTGGAGAACCTTAGAGGAGTCAAGTTGGTGAACAATGACCTT  
 GGGGAGATTGTTGTAGAAGGAGATGAAAGCAATCCAACAGAAGACATCATCGCGCAGTAC  
 CCTATAAAAGTCACTGCAGATAATTCAGGAGAAGCCGGTCATCGCATGACCGATCCCACT  
 GACGTAGGCGGCATCGACACTGCCCCGATCTTCTCGCAATCTCAACCTGACGACTTTGCT  
 GCTGGTTTCGACGACGTCAACCCTAATGCATCTTTCGATCTGTACGAGAAGGTTGACGTC  
 AACCACAGGCTATTCGTTTCAAGGGTCGCTGCGGCGAAGACATTCTTCCACCGCATTGAG

CCATCGAAGAAGGTCAGCTTCCACTCGAACCCGGCAGCAACCGCCGTCAGTAAGGCGACC  
 GAGAAGTTCCATTTCCCCGTTACGACCAAAGTTAGTGGTAGGGTTTCATTTTGTAGCAAG  
 TTCAAGGCACTCATAAGGGACAAGTTCTTGATGATGAGGCCATCACATTCATACCAAAGG  
 TTGGGCAGCAAAGAAACCACAGTGAATGAGCTGCTGCAGATTGTGTCACTCCTTTTAGCA  
 CCGAAGCAAATCAATGGCTGCCCTACTGAGCAAGAGCTGGTCAAGAAGAAGGCGAAAGAA  
 GTGATGAAGCCGGGATGGGGTCGTGAAGGGAGCAACAAATTGTGGCTTCCGCTCTCCAAA  
 GGAAGGGCATTTCAGCATGTTTTTGTAGTGGGAAATGGACGTTTCTAACCTCCGCGTTG  
 GCCATCAGCACTCCAGCTGAGTGCATCACTAA

#### Protein

#### > ONAC054

MAPVSLPPGFRFHPTDEELIIYYLKRKINGRQIELEIIPEVDLYKCEPVDLPEKSFLPSK  
 DLEWYFFSPDRKYPNGSRTNRATKAGYWKATGKDRKVNQRRVGMKKTLYYYRGRAPH  
 GSRTDWMHEYRLDERECETDTGLQDAYALCRVFKKTAPGPKIIIEHYGVVHHHVEQPQWM  
 TSSIDRSPTLDVSCDGRGDDFESSFSFPTETPMDSMHGGFGMQMSAPHEDGKWMQFLSE  
 DAFNATNPFLTNPVSANFSLPSKVDVALECARLQHRLTLPPLEVEDFPQDVSLDTKIGI  
 LRSNPNEVDILQEFLSVATASQELINGSTSSYPEMWLGASTSSASYVNELSSLVEMGGVG  
 TSNHHESARLQVEIADMEVFKDEKKRVENLRGVKLVNNDLGEIVVEGDESNPTEDI IAQY  
 PIKVTADNSGEAGHRMTDPTDVGGIDTAPIFSQSQPDFAAGFDDVNPNASFDLYEKVDV  
 NHRLFVSRVAAAKTFFHRIEPSKKVSFHSNPAATAVSKATEKFHFPVTTKVSGRVSIKSK  
 FKALIRDKFLMMRPSHSYQRLGSKETTVNELLQIVSLLLAPKQINGCPTQELVKKKAKE  
 VMKPGWGREGSNKLWLPLSKGKGISSMFLSGKWTFLTSALAISTPAECDH\*

#### Gene Structure

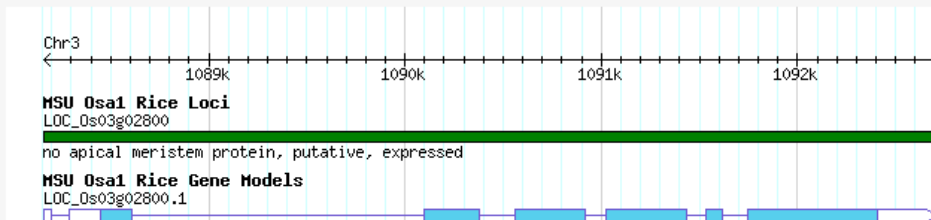

#### LOC\_Os03g01870 (ONAC055) sequence information

**Genomic sequence length:** 1271 nucleotides

**CDS length:** 894 nucleotides

**Protein length:** 297 amino acids

#### Genomic Sequence

#### > ONAC055

TGCACGTAGTGTTCGATTAATTCTTGAGCTCATATATTACTTATTCATCCAAATAGTATT  
 GGTAGCTTGTGATCGAAGAATTAATCCATGGATGGATTGATCAGTGATGATAGTATGAT  
 GATGGGTGGTGAGGTGAGGGCGATCGAGTCGAGGCTGCCTCCGGGTTTCAGGTTCCATCC  
 CAGCGACGAGGAGCTAGTCGGCTACTACCTTCGGAACAAGCAGCAGCAGCAGCAGCA  
 GACGGCGGCCACCTCCATGCTCGTCGAGGTTGACCTCCATGCCTGCGAGCCATGGGACCT

ACCAGGTAATATAATACTTACCAGTTAATCTACTACGTACAGTAGTAGACTAATTAATTA  
 ATTAATTAATTGATAAACTTTGTGAAATTGGCATATACTCCTATATGTGTAGAGGTGGCG  
 AAGGTTGGTTCGGATGAGTGGTATTTCTTCAGCTGGAGGGAGAGGAAGTACGCGACGGGG  
 TGGCGCAGGAACAGAGCGAGCAAGCAAGGGTACTGGAAGGCCACCGGAAAGACAAGCCC  
 ATCCTTCATCCGACGGTGGCCGGCGCCAGGAAGACGTTGGTTTTCTACTCCGGTCGCGCC  
 CCCAACGGCCGCAAGACCGCCTGGGTCATGCACGAGTCCGCCTCCTCCATCATCATCAT  
 CATCCAAACCCAAATGTAATTACTCCTAATTATATTATATATATATGCATTATATATGTA  
 GCTAATTAATCTGAATGTATGTACACTGATCTCTGCATGCAGATTCAGAATATGCAGCAG  
 CAGGAGGGGGATGACTGGGTGCTGTGCAGGGTGTCCGTAAGGGGAACAACAGCAATGGA  
 CAACCTCTAGCCACTTCTTCGCCACCTGCTCATCACCTGGTGGAGTCACTCATCAGCTCA  
 CCTGCACCAACTATCATGAGCGATCACGATCGGCTCTTCACCATCCAGCTGCCGCATCAC  
 CAACATTGTGATGAGCAGTACTTTTTCTTAGATGACGATGAACAGCACCAGCAGCAGCTG  
 CTAGATCTTTTCAGTGCTCCAAGCTCCAACCTCGTTCGAGTCTGAGCAAGCTCCAGGCCAC  
 GGTGGCATGGAGATTAATATCGCAGAGATGGAGAGCTTCGACACGACCTGTGCTGCGCTG  
 CAAGACGCGAGCGATTACTGCATGCAGCTCTATTAATTAATTCAATGGATGGATGAATCA  
 CACGTATATATACGCATAGCCTTAAATTAATTAATGTGTATCATCAGCTTAATTAATTGC  
 GCACTTGGCTT

CDS

> **ONAC055**

ATGGATGGATTGATCAGTGATGATAGTATGATGATGGGTGGTGAGGTGAGGGCGATCGAG  
 TCGAGGCTGCCTCCGGGTTTCAGGTTCCATCCCAGCGACGAGGAGCTAGTCGGCTACTAC  
 CTTTCGGAACAAGCAGCAGCAGCAGCAGCAGCAGCGGCGGCCACCTCCATGCTCGTCGAG  
 GTTGACCTCCATGCCTGCGAGCCATGGGACCTACCAGAGGTGGCGAAGGTTGGTTCGGAT  
 GAGTGGTATTTCTTCAGCTGGAGGGAGAGGAAGTACGCGACGGGGTGGCGCAGGAACAGA  
 GCGAGCAAGCAAGGGTACTGGAAGGCCACCGGAAAGACAAGCCCATCCTTCATCCGACG  
 GTGGCCGGCGCCAGGAAGACGTTGGTTTTCTACTCCGGTCGCGCCCCCAACGGCCGCAAG  
 ACCGCCTGGGTCATGCACGAGTTCCGCCTCCTCCATCATCATCATCATCCAAACCCAAAT  
 ATTCAGAATATGCAGCAGCAGGAGGGGGATGACTGGGTGCTGTGCAGGGTGTTCGTAAG  
 GGAACAACAGCAATGGACAACCTCTAGCCACTTCTTCGCCACCTGCTCATCACCTGGTG  
 GAGTCACTCATCAGCTCACCTGCACCAACTATCATGAGCGATCACGATCGGCTCTTCACC  
 ATCCAGCTGCCGCATACCAACATTGTGATGAGCAGTACTTTTTCTTAGATGACGATGAA  
 CAGCACCAGCAGCAGCTGCTAGATCTTTTCAGTGCTCCAAGCTCCAACCTCGTTCGAGTCT  
 GAGCAAGCTCCAGGCCACGGTGGCATGGAGATTAATATCGCAGAGATGGAGAGCTTCGAC  
 ACGACCTGTGCTGCGCTGCAAGACGCGAGCGATTACTGCATGCAGCTCTATTAA

Protein

> **ONAC055**

MDGLISDDSMMMGGEVRAIESRLPPGFRFHPSPDEELVGYLNRNKQQQQQQQTAATSMLE  
 VDLHACEPWDLPEVAKVGSDEWYFFSWRERKYATGWRRNRASKQGYWKATGDKPILHPT  
 VAGARKTLVFYSGRAPNGRKTAWVMHEFRLLHHHHHPNPNIQNMQQQEGDDWVLCRVFRK  
 GNNSNGQPLATSSPPAHLVESLISSPAPTIMSDHDLFTIQLPHHQHCDEQYFFLDDE  
 QHQQQLLDLSVLQAPTSFESEQAPGHGMEINIAEMESFDTTCAALQDASDYCMQLY\*

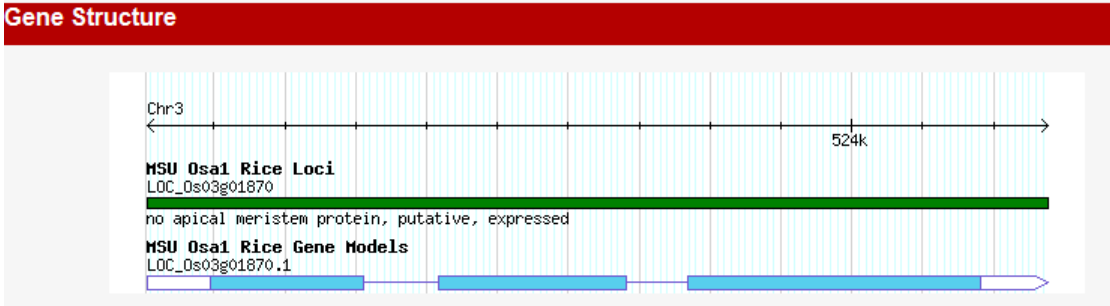

# **LOC\_Os03g03540 (ONAC056) sequence information**

**Genomic sequence length:** 2656 nucleotides

**CDS length:** 1101 nucleotides

**Protein length:** 366 amino acids

Genomic Sequence

## > **ONAC056**

```

ATGGAATCATGCGTCCCTCCTGGGTTTCAGGTTCCACCCACCGACGAGGAGCTCGTCGGC
TACTACCTCCGCAAGAAGGTCGCCTCCCAGAAGATCGACCTCGACGTCATCCGCGACATC
GATCTCTACCGCATCGAACCCCTGGGATCTCCAAGGTACAAGTAGAGATCGTATGATTAAT
TTGAGTTTCAGAGATGATCATTGTGGCATTATTTATCCTAATTGTGTTGCCTGGTTTGT
GATTGATGAAGAACATTGTGGGATCGGGTACGATGAGCAAAGCGAGTGGTACTTCTTCAG
CTACAAGGACAGGAAGTACCCGACGGGGACGAGGACGAACAGGGCGACAATGGCGGGGT
CTGGAAGGCGACGGGGAGGGACAAGGCGGTGCACGACAAGAGCAGGCTCATCGGCATGAG
GAAGACACTCGTCTTCTATAAGGGCAGGGCGCCTAATGGCCAGAAGACCGACTGGATCAT
GCACGAGTACCGCTCGAGACCGACGAGAACGCGCCGCCACAGGTATATACATATACCGA
TTTCACTAGCTAATTGGTTTCTTAATTTTCTCTGCATGCTAGCTAGCTCTACATAAACTA
GCAAAGTGGTTCCATGCTTGATAGGCTAAGTTCCTAATTTTAAAAAGTTGTATATATCCG
GTTGGATGTATAGGCTGGGTTTATCAAAAAAAAAAGAAAATATTTTTTAAGGTTGTTAGT
GACCACATTGCATACTTATATATCTGAGAAAAATATATCTGAATTATATACTTATATATGT
GTGTTGCAACTTGCAACTGAAGATAAAATGCAGTATACCAGCTTAGGCCTTATTAGAGGT
TAAGGTCTAATGGTGCCAGAGATTTCTAAAGTAGCACGCACAGAGATCTGCCGCCGATA
TACATGCGTGCAAGCATGTCTAATTCATGTACCACTAGTAATGGACCATATAGATAGGAA
TATATCAGTAGCACTAAGCAGCACCACAACCTTTTTTGTCTTGAAAGATAAGTCTTGCA
TTGGCCTCCCTTTTTGTGAGCCTTCCAAAGTCTTCTATTCTCTCCCAAATAAAGGTAGCC
TGCATCCAGTGTTGATGCCATCCTGACCTTACCACTAACACCAAAACCTTTTTTCCCTAG
ACAATTGCATGCGCATGCATGGCCTAGTTAGGGTTTCCCCTGGTGTGAACGTCCTAACAT
GCGCCATATATTGTTTACAAGCTGTATGCAACTTGTGCTAGTACTCATCAAAACCATTGC
ATGCTGCTTGCAAACATGTCACCACAAAAGTAAAAAGTTATCAGCTCGTATTGTTCCA
CTATCACACAGTGGGAAGCTAGCTAACTTTACGAATGATTGGCAAATACTTTGGTGTCAA
TGTAACCTTGCAAAATGCAGCTCACATCCCCCGTTCGTTTCTCTTAAACAATGGA
TTAAATTTTGAATTTTGTGCTACGCTTTTCAAAGTGTAAACGGTGTGTTTCTTGTGAA
AACTTTCTATATGAAAGTTGTTCTAAAAATATCGGATTAATCTATTTTTCAAGTTTATAAT
AATTAAGAACTTAATTAATTATACGTTATTACCACAACGTTTACATGAAATATTTAATCT
TAATCTTCGGGAGACTCAAAACACCACCTAAGTATCTAACTTTATTTGCATGTGTGTACTA
CAGGAAGAAGGATGGGTGGTGTGCCGAGCATTCAAGAAGAGGACGGCGTATCCGGCGAGG

```

AGCATGGTGGAGACGTGGGACTACTCCTTGACGAGCGCAACATCATGAGCGCCGCGCG  
 GCGGCGGCGTTTCGCCGATCCGAGCGCGGCGTACGCGCAGATGAGGCGGCAGCACAGGAGC  
 GGGCGGTTCAAGCAGGAGGCGGAGCTGGACGGCGCCGCCACAGCCCTCCTCCACTACTCC  
 AGCCACCTCGCCGAGCTGCCGAGCTCGAGAGCCCCCTCCGCGGCTGCGGCGCCGCTCCAG  
 CCCAACCCGAGCCAGCTGGCCACCGCCGGCGAGGACGACGACTGCAAGGGCGATAATGGC  
 GGTAGGAGGGCCAAGAAAAGCCCGCGCCGCCGCGACAAGGTGGCGACGACCACGACTGG  
 AGAGCGCTCGACAAGTTCGTCGCGTCGCAGCTTAGCCCCGGGGAGTGTGGCAGCATGGAG  
 GCAACGGCGGAAGCCGCGGCGGCGGAGTCGCCGGTGTGAGCTCGCCGCTGGACCACGGC  
 GATGACGACATGGCAGCATTGCTGTTTCTCAACAGCGACGAGAGAGACGAGGTCGACAGG  
 TGGACGGGGTTGCTCGGCTCCGGCGCCGGCGGAGCGGCGTCGACGGCGACCTCGGAATC  
 TGTGTGTTTGACAAATGAGGGACAAAGCATTACAGCACGATGTGTTTCATCACATCAACC  
 GGATGGGATATATGGTTATAGCTGAAATTTTTATAAATTGTTCTCTTTTTTTTTTCTTCTG  
 CTTCTTTTTATGTTCCCAAATGTGATTGTAACCTTTAATCGATCTGTCCCCTGTGCAGAG  
 TCATAAGATGCATGGCATTGCAATGTGCTTTTTTTTTTCCCAGTTGATGTGATCCTACATT  
 GGCACCTTTGTAAATGTCTTTGACTCCCAGCTGGGTGGCATATATAGTACACTGTACTCTC  
 TACAGTAATTAATGAC

CDS

> **ONAC056**

ATGGAATCATGCGTCCCTCCTGGGTTTCAGGTTCCACCCACCGACGAGGAGCTCGTCGGC  
 TACTACCTCCGCAAGAAGGTCGCCTCCCAGAAGATCGACCTCGACGTCATCCGCGACATC  
 GATCTCTACCGCATCGAACCCCTGGGATCTCCAAGAACATTGTGGGATCGGTTACGATGAG  
 CAAAGCGAGTGGTACTTCTTCAGCTACAAGGACAGGAAGTACCCGACGGGGACGAGGACG  
 AACAGGGCGACAATGGCGGGGTTCTGGAAGGCGACGGGGAGGGACAAGGCGGTGCACGAC  
 AAGAGCAGGCTCATCGGCATGAGGAAGACACTCGTCTTCTATAAGGGCAGGGCGCCTAAT  
 GGCCAGAAGACCGACTGGATCATGCACGAGTACCGCCTCGAGACCGACGAGAACGCGCCG  
 CCACAGGAAGAAGGATGGGTGGTGTGCCGAGCATTCAAGAAGAGGACGGCGTATCCGGCG  
 AGGAGCATGGTGGAGACGTGGGACTACTCCTTGACGAGCGCAACATCATGAGCGCCGCG  
 GCGGCGGCGGCGTTTCGCCGATCCGAGCGCGGCGTACGCGCAGATGAGGCGGCAGCACAGG  
 AGCGGGCGGTTCAAGCAGGAGGCGGAGCTGGACGGCGCCGCCACAGCCCTCCTCCACTAC  
 TCCAGCCACCTCGCCGAGCTGCCGAGCTCGAGAGCCCCCTCCGCGGCTGCGGCGCCGCTC  
 CAGCCCAACCCGAGCCAGCTGGCCACCGCCGGCGAGGACGACGACTGCAAGGGCGATAAT  
 GGCGGTAGGAGGGCCAAGAAAAGCCCGCGCCGCCGCGACAAGGTGGCGACGACCACGGAC  
 TGGAGAGCGCTCGACAAGTTCGTCGCGTCGCAGCTTAGCCCCGGGGAGTGTGGCAGCATG  
 GAGGCAACGGCGGAAGCCGCGGCGGCGGAGTCGCCGGTGTGAGCTCGCCGCTGGACCAC  
 GGCGATGACGACATGGCAGCATTGCTGTTTCTCAACAGCGACGAGAGAGACGAGGTCGAC  
 AGGTGGACGGGGTTGCTCGGCTCCGGCGCCGGCGGAGCGGCGTCGACGGCGACCTCGGA  
 ATCTGTGTGTTTGACAAATGA

Protein

> **ONAC056**

MESCVPFGFRFHPTDEELVGYLRRKVASQKIDLDVIRDIDLYRIEPWDLQEHCGIGYDE  
 QSEWYFFSYKDRKYPTGTRTNRATMAGFWKATGRDKAVHDKSRLIGMRKTLVFYKGRAPN  
 GQKTDWIMHEYRLETDENAPPQEEGWVVCRAFKKRTAYPARSMVETWDYSLHERNIMSAA

AAAAFADPSAAYAQMRRQHRSGRFKQEAELDGAATALLHYSSHLAELPQLESPSAAAAPL  
QPNPSQLATAGEDDDCKGDNNGRRRAKKARAAGDKVATTTDWRALDKFVASQLSPGECGSM  
EATAEAAAAAVAGVSSPLDHGDDDMAALLFLNSDERDEVDRWTGLLGSGAGASGVDGDLG  
ICVFDK\*

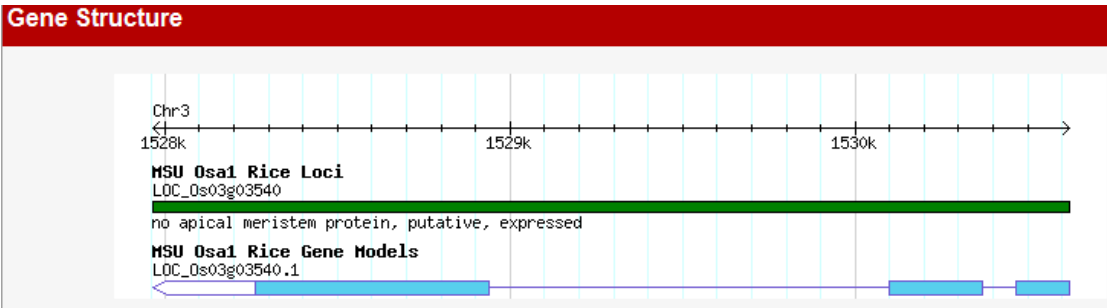

### LOC\_Os03g12120 (ONAC057) sequence information

**Genomic sequence length:** 7501 nucleotides

**CDS length:** 2661 nucleotides

**Protein length:** 886 amino acids

**Putative Function:** no apical meristem protein, putative, expressed

Genomic Sequence

#### > ONAC057

ATGGCCAAGGACAAGGAGGTTCGGCCCCCTCCTCCCCCTGCGTCGACTCCGACCACGAG  
GACCTCCCGCTCGCCGAGCGACGGCGGCGGCTGCTCCGCCCCGCCGGCGGAGTCAAAGCCT  
CCCGCTCCGAGAGGTGCCGCGCCTCCCTTTTCTCCTTGTCTGCTCCTGCAGATGTTTCT  
TTTTTGGAGTCCCTCATCTTTGTGTTGTTCCGGCGCAGGCGGGAGGCTAGCGCCGCGGCGG  
CGGCGGCGGAGGATTCCGGCGGAGCGGCGCAGCAGGTGGGTTTCTTTTGATTTTTCGCTG  
TGGTTATTAGACGGTTAGACGGTGTAAGTTGTAATCTTTTCTGCTCTTGTCGTCCGG  
CATTCGAATGAAAACCGCATTCTTGTGTTACCGTTCTTTTGCTTTTGTGGACGTGCGGT  
TTTGGTCAGAGCTGAACATGACGGAATATACCTTTATGAGAAATAATTGAACAGCTATTG  
TAAATTTGTAATCAGTCATCACCGCTCCTCAATTTTCTCACCTCCACCATTGTTGAAC  
ATTACTTTTATCTACATCTAATAGCAGCTACAAAGGACATTTCTTTTCTTTGAAACGA  
GTAAATTAATTTCTTTAGGAGGGAGTCTTATGTGGATTGCCATCTTGCTGGTATCAACTG  
TTTCTGTAAATGTTTGTATGGAACCTCTTCCATGTGTTTCTTTTAAACTGCGCTCCTA  
AAAAATCTCCAAATGCGCCAAGAGCAATTCCAAGATCTTCCGTACAAATGCTTGCATCAT  
GTAAATTTGCTTCTTTACTTAAATGTTGTGCTTATTGTATTGCTGCAGGGTTGGCCAGGT  
CTTCCCAGAGGTGTAGAGTTTAATCCTACCGATAGCGATCTACTCTGGCATCTGGCTGCA  
GAAGTTGGAAATGGTCAGGCTCGTCGTCATCCTTTTATCAACGAGTTTATTAAATCTGTT  
GATGAAACCATAGGATTTGGTTATACTCACCTCAAGATATACCAGGTAGTTCACTATTA  
TTCAATGTAAATATCTCTCATGTCTGTTCCCTTTATGATTTACTGTCACATGCTACATTT  
TGATTGATATTTTAGGTATTAGGCAGGATGGATGTGCATCATATTTCTTTCACAAAACT  
TCAAGGAGTGCGCCAATGAGAACAGTAAATGTATCAGATGGCAAAAAAGTGGAATCCTA  
TATCAATAACTTTGGATGGGAATCTTCAAGGTTGCAAGGAAGTATTTGTATTGTATGCCT  
ACGAGACAGATGGTAACAATCCTCAGATCACTGACTGGAGATTACATCAATATCATATCG  
AAAGCACAGAGAAAGATGAGGGAGAATTGGTGGTGTCAAAGATATTCTACGAGTTAGAAA

AAAATCAATTTAAATGGGCTGAGAAATCTCACGCTCAGTCAGCACAGGTGTATTACTTAT  
CCTTGATTTTTTCTTGTAGTTTAATATGGTATGAGATAACCCTGTCACCCTTGACTCTTT  
TTTTTTGTTTTAAAAATAATTCTGAAAGTAACTGATCATTGTAAAAAAACACTGC  
AAGGCAAATATTTAAGCTACATTTGTTGGATTAGTATTAGCAATTTGTTATATTAAACGT  
GTTGGAACCAAATTCGAGAGGGCTCTGTCATGATTTTTAAAAATTGACTTTTGTTTGATCC  
ATTGGCCAATGAACACTGTTCAAGTTCTTTGCAGGATTTTCATACTAATTCACATTTAGT  
TTACTTGAACATGGATGCTATCCTACTAGTTAAGTAAAAACTGCTTTTGCAATTAATGTT  
ACCTTGACTCTACTCAGAGTAGGTACTGTGATTCTGGTATGCTTGATCACAAGGATTCTT  
TTAGTTTTGCGTCATTTACCTGTTCTTTGGTATCAATCTGTTTCTTGTTTCCTTAGTTGA  
ATATATTCGGCTGTAGCTGTTTTGCATTTCTTTATCTTATTTATTGCTTAATTTTTAAGT  
CTAGTCTTGACTCATTGTAAAGTTTTCAATCATTGTAGTTGATTTCTGCTAACTTTCTG  
AAGTTAACAGGCACTCAATTTCCCTGGGGCTTTATAACAATTAATTTAAGTAACACATGC  
TAGATGTTTGTTCGAAATTCATGCAAGGTGCTTCTGCAATCGATGATGATTCCAAAG  
AGGAATTACAGTTGGACAATCATTCTTTAATATGATTACTGAAAATAGTTCTGTTCAAG  
GTTTCGTGTCCTCATTACATCCATTTATTTTAAATGCATTTTTTTGTAACATAGACCATGA  
CACTGAATTCCTTCAGGCAATGAAAACAAGCAAAAGCAGACGAAACAGGGACATGTCC  
TAATCTGGACAACTAAGTTATTTCAATGTGGTAAGCAACATGCATATTGGGAACCAAAT  
TAATGATCATGATGAAATCGAGGAGCTTGATCATATGTCTCTGCAAGAGCGCTACAGAAT  
TCTTATGGCAGAAAATCATTCTTCCTCTGCTGTAGTATCTTCTGAACAATGTGCAATTGA  
TGGTTTGGAGAATTCATGCAAGCCTGGAACCTAATGGGATGATTCCTAAAAGGTGAGGGGG  
TGAGAAAATGTATACATTTAATGTAGGTAGCTATAATTTCTGAGAAAAAAAATCCCTGT  
ACACCCGTCCTTATGGTACATCCACTTTCCTGTGTACTAAGTTCTTAATAATCCTACCTA  
AATATGGAGATATAGAGAAGGATGCTCTATAGTAAACTTTAAAGTCAAAGTTGATTGCA  
TTCGCAAGAGAAAAAAAAGTAACATATCTCCAATTATTTTGGGAATTGATGTGAACATT  
GACAAGTGAATTCAGAAAAGATGCTCTATATAAGGTTTGTACTGATATGAAGTTCATAT  
TGTAATTTTGCATGTAGAATTCATGAAGGGACTGCCTTCAGGGATGGTATGTATAGCATG  
TTGCAGGTACAAGCACACTTCTCAACTGTTTTGGTTATGCATTAAATTTATGTTCTAAT  
ATCATGTTTGAAATGTCTTTGTTATCCCTGATGCCTCATTAGGACTTATCACAACCTCC  
ATTCTTGGTCAATAAGCATGCGCATAACAATAGCTTTTCTATCAAGAACATATAAATTTA  
TTTTTCATTGTGCCAACTGAATTTAGTGATTCAAGGTTGCACATTGTCTGTGGGAGGGAG  
GGAAACGAGAAACGGGTCTGTTCAATTGTTTGCAATTATATGCAGGAAATTTCTTCTGCA  
CCGGCCATTATAGGTAGTATCGACAAATGATAACAACAGGAGGTTGCTAACTGAAGGTCTT  
TCAAACAACCAGCAAAGTCATGAGGCTGGATGTAAATCTCTTCTCCTTTTCTTTTTTAAT  
TCGAGTCCTTACTTCCACATGTCAATGGTGAAGAAAGCATTGATTACTATACTCTGAAAC  
AAGTGATGATAAAACAACCTACTGCAGGTGAATCAGGTTTCTTGAGTACATCATCTTCTGC  
TGCTCCACCACAATGTCAAGTTGTGTGCTCTCATGATCTATTGGTAAACGGCAAGACTCT  
TATTTATAGTCGCGACCCCTCTTCAAGTTCAACACCAACTTTTGGGGATAAAAACATTCA  
GTTGGAAGGGACAGATGATAGGACCCCTTTGGTTGACATAAAATTGGAACCTGCATTGGA  
AGGTTATGATATTTACCATCTGAATTTTGTGTTGAGCAAAATCTCACCCTATTCCTTAAA  
CAACAGTGGTCTGGAAGATTGATTTAGCACCAGCATATGTTTGTCAAAACCCAAAAGACA  
TCAATATTGATTTTGAACCTTGCATGTCACAGGGGATTTACAGAGAAAATTACATCTT  
CTGTACAGAGAACAGATCCAAATCATGGCACTGAGGGCTCTAATCTAGTTGGGTCTATAA  
ACTCTGTTTCTTCAGCGATCTCCAAAAGAATATCAGAAGCAGCAAGATCTAACCCAGAGA  
ATTCTCATGTTGAAGGCCTACTGCCATCATCACGAATAAAAAGCGAAGTTACCGGGAGTG  
AGTTACCTCTAGTTGTGTGTGGTCTCACTTCTATCAGTATCGCAGAGCTCACTGCCAAAA

AAACCAATACTCTAAACCATGACGGGGTCCTTGCTTACTGTTCTCGAAAAAGGAAAAGGA  
GGAAGACTCTGAGGTATGCTGCACAGGCAACATTTTTAATGTTCACTGATTCTCTTTT  
TGGCTAGATTATGCTTATAAAAAATCATGTATGCAGGGATCCAAGTGAAAAGACGCTTGAA  
GAAGATTCCCTCAGAAATGATGAGGGTACTGCTTACTTTTCTCGTCAAAGGCGAAGGAGA  
AAAAACAGCAACGTATGCTACATGAGTAACTTCTGTCAATGTTGACAACTATTTTGTAGAA  
TCTGATAACAAACGTGATGTACGCAGGGATTCAATTGAAACGGCACTTGAAGAAGATGCC  
CCAGGACTACTGCAGGTACCCATTTGTCGTGTTCATAGTTCTATTTTAATTCAATAACGG  
TATTTCAGTAAGCATTTCATTCCAACCTTCTGATTCTGTGTTTTCCGTATCTTTTCGTGCCTGCA  
GATTCTTCTGGACAAAAGGAATACTGGTTAAAGAGATTAAACTCTACGGTGTGAAGAAGA  
AGATGATATGGTCCCAGACTGCACAGAAAGTGACTTTCAGATCTTGAAAATGTTATTAC  
AAAAGTAAGATTTTAAAAATGGTACTTAGTCTTATAAGAATGGGTATTTTTGTCTTTGAGA  
AAGAAAATACATTGTACAGTATATCATTGAAATATCTCAACAACCCCACTTGACATG  
TTGAAAATGGTTTGTGAGAATCTGCATAACATCTGATATGCCTCACTTGCTTACCTTTT  
TCGGATGGTATCATACCACTCCCGCTATTTTTAGCGGGTAGAGGTTATTCTACTAGCCTG  
GGTCAAGCCTTTCTCTGCAGGGCCCTTGTGATCCTTGTGCAGTAAACCCCTACGGGTGG  
TTCCCCATTGTCATGATGTAGCGAACCACTGCAAACTTTCACAAAGACACCTTAAGT  
GCTCCAGCTTCATATGTGACAAGCAACGCCGAAGAAAAGGAAAAGGATAATGTATCATCT  
TTTCAGAAGCATTCCACTGCCACTGGGACCATGTTGTATTAGTGGACTCGTTCTTGCTTC  
TCCTTGTTACTGTTCCCTAACTCTCCGAGTAGTTAGAATGTTGAATTTTCCATACTCAGCA  
ACAACAGAAGAGGAAAACATTTGCATGTTTGTAGTTACCTTGCGTTTTCTTCCCCTTCC  
CAACTGAAAAATATAATCACCTCCCCCCCCAGCAATACAGCAGCTATGATTTGGTTTACA  
TGATTTTCATTTGTTGGTCATGTCACCAGGAAGTTCAGTGTGAATTGTGTTATGTCTGTAA  
ATACAGATGACTTAGAGGTTATTGGCCTAATTTCCCCAAGGTTGAGGGACTACATCTGCA  
TCTTTAGTATTATGGGCTAATTGTGAAGAGCAAATGGCATGGGGTGGTTATGTATGTTAT  
AGTTTACTGACATGTTTTATTTGTTCAATACACAGTTGTTTCCGCAAAGAACATCCCTGT  
TGAAATCTGCACTTAGGCATGAGAAGGGGGAAAAGGCTATATACTGCTTGACCTGTTTAA  
TTTCTCTCATCGAGCAGGTATTTATCCACATCTAGACAACATTTGCTATTTTTATTTTCT  
CACTTGACGAGGCTTTCAATTTTAGTGTTTTATACACCTTTATCTCTTGTAGTCCCGCT  
ATCTTCAGTTTCGTGATTGTCCGTGTTGAATGGGGATGGTGTAGAGACCTGCAATCATTTA  
TTTTTATTTTTTAAAAGCCATAACAGGTAATCTTTCTTAGCCAATACTATTATTCAGGTAC  
TGCCGGTTAAAATGGTTGATATGCTTCTTTCCCTTTATGCCTTCCTTTTTTTGTTTCACAG  
GATTGTTCTTGAGCGACCGGAATATGGGTATGCGACATACTTCTTTGAGATTGTGAAATC  
ACTGCCAATACAATGGCAGATCCAAAGGATGGTTACTGCAATGAAGCTTAGTGGTTGTGG  
CAGGACAGCTCTGATTGAAAATAGGCCATTATTGGTAAGATTTCTTGCTTTGGTATTTTT  
TTCCCTGCATTTTCCAGTGTTGTGCTGCACTTTTTGACTGTCAACGTACGTAGAAATG  
TGGTCAAAGTAAAAGGCCCTATTATCGACTTATGATCAGAGGAGGAAAAAAAATCAGCTC  
TATTGATGCTGGTTACTGGTATATCGTCTGTGACCAATAGATATGATAAAGCCAGTACAA  
GGGTAAAATTATACGAAGTTTGATGTGTTGTATGTAATCTTGAAGCTGGTGATTGTAAAA  
GGTTACATTTGAGGAAAAATATATTGTAAGATTTTTTTTTTAAAAGGTAACTGGAATAG  
ACTTGAAACATTACAGTAACTGGTCAGTTTACCTGTTACCAGCATAGCTTTTCATAATGT  
CTTCTATCCTTGCTTATGAACACAAGTACACAACCTACCCATTAACCATTAATAAACTGTG  
TTATAGCCTTTCTTAGTTTCTTTTCCAGTTGACAATTGTTTCTAGGATCCTCTATCAGAA  
TACGCAGTACTAGTTTGAAGCTGGATACAATCATACATTCATGCACTCGACTCTTTTT  
CTATATTTCTTTCTGATGTAACCTAAGTTTGTGATATCGTTCATAATATACCTCCGAAGAA  
TATATTTCTCGTTTTAGAAAAATTTAGCACCAGATATATGTTACATAGGACATTAGCTT



CAACGGTCCAATCTCATATGTACCTTCCGTAGTGAAAGGAGTTTATAATTTTGTGCTACC  
 TCAGTACCTTTTACTCATGAGTTCTTTCATGAGTAAAAGGAGTTTGTAGGACATTGAACT  
 AATCTATTTTTTACAGATTGGTGAAGATTTGACGGAAGGAGAGGCGCGGGTTTTGGAAGA  
 ATATGGTTGGGTACCAAATCTGGGCTTGGCACAATGCTCAATTACCGTGACCGGGTAGT  
 TCATGACAGGTGGAACGAGAGATCTGGCACAGATTGGAAGACAAAGATAGGAAAGCTCCT  
 GATGAATGGGTATTCCGAGGGGCATTTGGTCCTATCTCACTTTCCAATAAAGTTGGGAA  
 AATAGAAGATGACACCGAAATCAAACAGGAGGATCCTCTCTGAGTTATCCCCTGTCTTGT  
 ATATGCGCTTGGTAATCCTGCAAAAGTTATAACCTTTAGCAGTAAAATGGCTAATGCCACC  
 CCCCTTCTTCATGTGGGCTTGTAGAGTTGTTGTAGTCATCATTATAATTCAGAAGGCTTA  
 CAAAGAATGAACACAGGGGTGCCATGTGTAGCCTATCTGCACCTGTACGTAGGAAATCAT  
 GGTGGGGTAACACTGTAATAAGTGTGTGGATGGATAGACAGGTGAACTAGCATTTTTTT  
 TTGCTAGCTGTTGATAAACATTAGATCATCTGGCAAATGGTGGGTATTCATATATGGATT  
 C

CDS

> **ONAC057**

ATGGCCAAGGACAAGGAGGTTCGGCCCCCTCCTCCCCCTGCGTCGACTCCGACCACGAG  
 GACCTCCCGCTCGCCGAGCGACGGCGGCGGCTGCTCCGCCCCCGGCGGAGTCAAAGCCT  
 CCCGCTCCGGAGAGGCGGGAGGCTAGCGCCGCGGCGGCGGCGGCGGAGGATTCCGGCGGA  
 GCGGCGCAGCAGGGTTGGCCAGGTCTTCCCAGAGGTGTAGAGTTTAATCCTACCGATAGC  
 GATCTACTCTGGCATCTGGCTGCAGAAAGTTGGAATGGTCAGGCTCGTCGTCATCCTTTT  
 ATCAACGAGTTTATTAAATCTGTTGATGAAACCATAGGATTTGGTTATACTACCCCTCAA  
 GATATACCAGGTATTAGGCAGGATGGATGTGCATCATATTTCTTTCACAAAACTTCAAG  
 GAGTGCGCCAATGAGAACAGTAAATGTATCAGATGGCAAAAAAGTGGAATCCTATATCA  
 ATAACCTTTGGATGGGAATCTTCAAGGTTGCAAGGAAGTATTTGTATTGTATGCCTACGAG  
 ACAGATGGTAACAATCCTCAGATCACTGACTGGAGATTACATCAATATCATATCGAAAGC  
 ACAGAGAAAGATGAGGGAGAATTGGTGGTGTCAAAGATATTCTACGAGTTAGAAAAAAT  
 CAATTTAAATGGGCTGAGAAATCTCACGCTCAGTCAGCACAGGGTGCTTCTGCAATCGAT  
 GATGATTCCAAAGAGGAATTACAGTTGGACAATCATTCTTTTAATATGATTACTGAAAAT  
 AGTTCTGTTCAAGGCAATGAAAAACAAGCAAAAGCAGACGCAAACAGGGACATGTCCTAAT  
 CTGGACAAACTAAGTTATTTCAATGTGGTAAGCAACATGCATATTGGGAACCAAATTAAT  
 GATCATGATGAAATCGAGGAGCTTGATCATATGTCTCTGCAAGAGCGCTACAGAATTCTT  
 ATGGCAGAAAAATCATTTCTTCTCTGTGTAGTATCTTCTGAACAATGTGCAATTGATGGT  
 TTGGAGAATTCATGCAAGCCTGGAACATAATGGGATGATTCCTAAAAGAATTCATGAAGGG  
 ACTGCCTTCAGGGATGGTATGTATAGCATGTTGCAGGAAATTTCTTCTGCACCGGCCATT  
 ATAGGTAGTATCGACAATGATAACAACAGGAGTTGCTAACTGAAGGTCTTTCAAACAAC  
 CAGCAAAGTCATGAGGCTGGATGTGAATCAGGTTTCTTGAGTACATCATCTTCTGCTGCT  
 CCACCACAATGTCAAGTTGTGTGCTCTCATGATCTATTGGTAAACGGCAAGACTCTTATT  
 TATAGTCGCGACCCCTTCTTCAAGTTCAACACCAACTTTTGGGGATAAAAAACATTCAGTTG  
 GAAGGGACAGATGATAGGACCCTTTTGGTTGACATAAAATTTGGAACCTGCATTGGAAGGG  
 GATTTACAGAGAAAAATTACATCTTCTGTACAGAGAACAGATCCAAATCATGGCACTGAG  
 GGCTCTAATCTAGTTGGGTCTATAAACTCTGTTTCTTCAGCGATCTCCAAAAGAATATCA  
 GAAGCAGCAAGATCTAACCCAGAGAATTCTCATGTTGAAGGCCTACTGCCATCATCACGA  
 ATAAAAAGCGAAGTTACCGGGAGTGAGTTACCTCTAGTTGTGTGTGGTCTCACTTCTATC  
 AGTATCGCAGAGCTCACTGCCAAAAAAACCAATACTCTAAACCATGACGGGGTCCTTGCT

TACTGTTCTCGAAAAAGGAAAAGGAGGAAGACTCTGAGGGATCCAAGTGAAAAGACGCTT  
 GAAGAAGATTCCCTCAGAAATGATGAGGGTACTGCTTACTTTTCTCGTCAAAGGCGAAGG  
 AGAAAAACAGCAACGGATTCAATTGAAACGGCACTTGAAGAAGATGCCCCAGGACTACTG  
 CAGATTCTTCTGGACAAAAGGAATACTGGTTAAAGAGATTAAACTCTACGGTGTGAAGAA  
 GAAGATGATATGGTCCCAGACTGCACAGAAAGTGACTTTCAAGATCTTGAAAATGTTATT  
 ACAAATTTGTTTCCGCAAAGAACATCCCTGTTGAAATCTGCACTTAGGCATGAGAAGGGG  
 GAAAAGGCTATATACTGCTTGACCTGTTTAATTTCTCTCATCGAGCAGTCCCGCTATCTT  
 CAGTTTCGTGATTGTCTGTTGAATGGGGATGGTGTAGAGACCTGCAATCATTTATTTTT  
 ATTTTTAAAGCCATAACAGGATTGTTCTTGAGCGACCGGAATATGGGTATGCGACATAC  
 TTCTTTGAGATTGTGAAATCACTGCCAATACAATGGCAGATCCAAAGGATGGTTACTGCA  
 ATGAAGCTTAGTGGTTGTGGCAGGACAGCTCTGATTGAAAATAGGCCATTATTGATTGGT  
 GAAGATTTGACGGAAGGAGAGGCGCGGGTTTTGGAAGAATATGGTTGGGTACCAAATTCT  
 GGGCTTGGCACAATGCTCAATTACCGTGACCGGGTAGTTCATGACAGGTGGAACGAGAGA  
 TCTGGCACAGATTGGAAGACAAAGATAGGAAAGCTCCTGATGAATGGGTATTCCGAGGGG  
 CATTTGGTCTATCTCACTTTCCAATAAAGTTGGGAAAATAGAAGATGACACCGAAATC  
 AAACAGGAGGATCCTCTCTGA

#### Protein

#### > ONAC057

MAKDKEVGP PPPPCVDSHEDLPLAERRRRLLRPPAESKPPAPERREASAAAAAEDSGG  
 AAQQGWPLPRGVEFNPTDSDLWLAAEVGNGQARRHPF INEFIKSVDETIGFGYTHPQ  
 DIPGIRQDGCASYFFHKNFKECANENSKCIRWQKSGNPISITLDGNLQGCKEVFLYAYE  
 TDGNNPQITDWRHLHQYHIESTEKDEGELVVS KIFYELEKNQFKWAEKSHAQSAQGASAI  
 DDSKEELQLDNHSFNMITENSSVQGNENKQKQTGTGTCPNLDKLSYFNVVSNMHIGNQIN  
 DHDEIEELDHMSLQERYRILMAENHSSSAVVSSEQCAIDGLENSCKPGTNGMIPKRIHEG  
 TAFRDGMYMSLQEISSAPAIIGSIDNDNNRRLLTEGLSNNQQSHEAGCESGFLSTSSSAA  
 PPQCQVVCSDLLVNGKTLIYSRDPSSSSPTFGDKNIQLEGTDDRTLLVDIKLEPALEG  
 DFTEKITSSVQRTDPNHGTEGSNLVGSINSVSSAISKRISEAARSNPENSHVEGLLPSSR  
 IKSEVTGSELPLVVCGLTSISIAELTAKKTNTLNHDGVLAYCSRKRKRRLTLRDPSEKTL  
 EEDSLRNDEGTAYFSRQRRRRRTATDSIETALEEDAPGLLQILLDKGILVKEIKLYGVEE  
 EDDMVPDCTESDFQDLENVITKLFPQRTSLLKSALRHEKGEKAIYCLTCLISLIEQSYRL  
 QFRDCPVEWGWCRDLQSFIFIKSHNRIVLERPEYGYATYFFEIVKSLPIQWQIQRMVTA  
 MKLSGCGRTALIENRPLLIGEDLTEGEARVLEEYGWVPNSGLGTMLNYRDRVVHWRNER  
 SGTDWKTIGKLLMNGYSEGLVLSHFPTKVGKIEDDTEIKQEDPL\*

#### Gene Structure

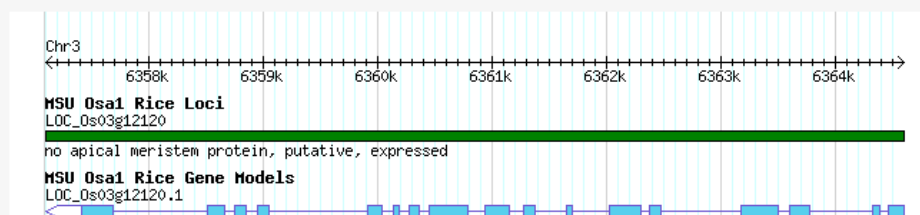

#### LOC\_Os03g21060 (ONAC058) sequence information

**Genomic sequence length:** 2457 nucleotides

**CDS length:** 1179 nucleotides

**Protein length:** 392 amino acids

**Putative Function:** No apical meristem protein, putative, expressed

#### Genomic Sequence

##### > ONAC058

```
GCGCGCATAAAAGGAGCCCCCTCCCCTCCCGTCCCCAAAAAATTCGAGCCCTCCTCCATCTC
TCGCTCCTCTTGATACAAGCTCGACCCCTGATAGATCTCATAGATCATAGCTGAGAGGGG
ATCGAGTGGCTTGATCTTGGAAGTGAGCAGCTATAGCTAGATAGGTTTTGCTTGTGCAGG
GAGGTGTGTGTTGTGTGTGGGTGACTGCCGGAGACGATGGTTCTGTCTGAACCCGGCGATG
CTGCCGCCGGGGTTCCGGTTCCACCCGACGGACGAGGAGCTGATCGTGCCTACCTCCGC
AACCGGGCCGCTCCTCGCCGTGCCCGTCTCCATCATCGCCGACGTCGACATCTACAAG
TTCGATCCGTGGGACCTCCCATGTTAGTACCCACCCTCACAGCTCGCCGCGATCGATCGA
TCACTGATTTGCAATTAATTTTCGTTGGTGATCGACTTGTGTTTTGATTTGCATCAGCCAA
GGAGAATTACGGGGACAGGGAGTGGTACTTCTTCAGCCCGAGGGACCGCAAGTACCCGAA
CGGGATCCGGCCGAACCGCGCCGCGGGCTCCGGCTACTGGAAGGCCACCGGCACCGACAA
GCCCATCCACAGCAGCGGCGGCGCGGACCAACGAGAGCGTCGGCGTCAAGAAGGCGCT
CGTCTTCTACAAGGGCCGCCGCCCAAGGGCACCAAGACCAACTGGATCATGCACGAGTA
CCGCCTCGCCGCCGACAGCGCCACGCGCCCAACACCTACCGCCCCATGAAGTTCCGCAA
CACCTCCATGAGGGTAAGCAAGCTCCATCTACGTTACCTAGCAGCCAGATTCAAATTATC
TAAACCAAACAACCTTAATTATGAACAAACCCTAGCAGCTGGATCTTGCTATCGATGGAGT
AGAGAGTAGATCGTCTATTATTCATCTCTGTCTGATGTGCTAGTGCCTTGCACAGTTGC
ACACCGTGGTTTTTTTTGGGTGGTTGTTTCTGATGATCGATACGTGTTTCGTCGGCACGTCA
GTATTATCGCATCGGTTTGTGCTTGGCAATGGACGCAACTCGCTGCTTTTAGTGTGTCT
GTTTTAAAGAGGGTGTCTTTTAGGCAATACTTGGCATGGTTGCGCAAGTCAATAGATCCG
ACAATGATAGCCACGATGCGTACGTGTTGATGACTGGTTCATCTCTGCATATGCGCGCAT
GCATACCCCTGAAATTAATCCCTTCTATTTTTGATACTCTTAATTTCTTAATCATATAG
TATATGCATCCGTGTGATTGATCGATCGATGTGCGTGGATTTTTGTGCAGCTGGATGACT
GGGTGCTGTGCCGATCTACAAGAAGAGCAGCCACGCGTCGCCGCTGGCCGTGCCGCCGC
TCTCCGACCACGAGCAGGACGAGCCGTGCGCCCTGGAGGAGAACGCGCCGCTGTACGCGC
CGTCGTCGTCGAGCGCCGCATCCATGATCTTGCAGGGCGCTGCCGCCGGCGCCTTCCCGT
CGCTGCACGCCGCCGCCGCTACGAGAGGACGGCGATGCAGAAGATCCCTTCCATTT
CCGACCTGCTCAACGAGTACTCGCTGTGCGAGCTCTTCGACGACGGCGGCCGCCGCCG
CCGCCCCCTGACAGGAGATGGCGAGGCGAGCCGACCACCACCACCACCAACAACAACAAC
ACGCCCTCTTTGGCCACCCCGTCATGAACCATTTTCATCGCAACAACAGCATGGTTTCAGC
TCGCGCACCTGGACCCGTCTCTCTGCGGCCGCTCGACGTCGGCAGGCGCCGTCGTCG
AGCCGCCGGCCGTACCCGGGAAGCGCAAGAGATCATCGGACGGAGGCGAGCCGACGATCC
AGGCGCTGCCTCCTGCTGCCGCGGCGGCAAGAAGCCGAACGGTTCATGCGTTGGTGAA
CTTTCCAAATAGGCAGCGCTTGCAGGGATCGTCACTGGGACTGAGCCACCAGATGCTGC
TCCACTCTAACATGGGGATGAACTGATAGCTCGTTCTTCGTACATAATACCACAGCCTGA
TTAAACACTGAACATAATTGCACATGGCGAATTGATGATTTGAACAGTGAGGTCTATTTC
GAAAGCAAATAGGTCCAAAACGATAGATTTAAATAGTAAATATATTGGGAAAGAAATTGT
ACTTAATTTGTACTTGTGTGGACTAGCTAGGTCGTCCGATCATGCATAGCTATATAGTTT
GTGGTGTGTATACATTTTTTCTCATGGTACTATACTACTGTGTACTCAAGCTAGCTCAGT
```

ACTAAAGATTAATTAAGCTAGATAGGGGTTGATAAGACTTTGAGATAGACCCACTAGAAG  
TCTGGAACATGAGATCAAGGAGAATGATGTCAAGATCATAAAGCCGATTATAGCTCAT  
ATTCATGTAAATCAATCAATAAGTGATTCTTTAATGGCAGCCACTCATTTTTTTTCAA

CDS

> **ONAC058**

ATGGTTCTGTGGAACCCGGCGATGCTGCCGCCGGGGTTCCGGTTCCACCCGACGGACGAG  
GAGCTGATCGTGCACTACCTCCGCAACCGGGCCCTCCTCGCCGTGCCCCGTCTCCATC  
ATCGCCGACGTGACATCTACAAGTTCGATCCGTGGGACCTCCCATCCAAGGAGAATTAC  
GGGGACAGGGAGTGGTACTTCTTCAGCCCCGAGGGACCGCAAGTACCCGAACGGGATCCGG  
CCGAACCGCGCCGCGGGCTCCGGCTACTGGAAGGCCACCGGCACCGACAAGCCCATCCAC  
AGCAGCGGCGGCGCGGCGACCAACGAGAGCGTCGGCGTCAAGAAGGCGCTCGTCTTCTAC  
AAGGGCCGCCGCCAAGGGACCAAGACCAACTGGATCATGCACGAGTACCGCCTCGCC  
GCCGACGACGCCACGCCGCCAACACCTACCGCCCCATGAAGTTCCGCAACACCTCCATG  
AGGCTGGATGACTGGGTGCTGTGCCGGATCTACAAGAAGAGCAGCCACGCGTCGCCGCTG  
GCCGTGCCGCCGCTCTCCGACCACGAGCAGGACGAGCCGTGCGCCCTGGAGGAGAACGCG  
CCGCTGTACGCGCCGTCGTCGTCGAGCGCCGCATCCATGATCTTGCAGGGCGCTGCCGCC  
GGCGCCTTCCCGTCGCTGCACGCCGCCGCCGCCGCTACGCAGAGGACGGCGATGCAGAAG  
ATCCCTTCCATTTCGACCTGCTCAACGAGTACTCGCTGTGCGAGCTCTTCGACGACGGC  
GGCGCCGCCGCCGCCGCCGCCCTGCAGGAGATGGCGAGGCAGCCCGACCACCACCACCAC  
CAACAACAACAACACGCCCTCTTTGGCCACCCCGTCATGAACCATTTCATCGGAACAAC  
AGCATGGTTTCAGCTCGCGCACCTGGACCCGTCCTCCTCTGCGGCCGCCTCGACGTCGGCA  
GGCGCCGTCGTCGAGCCGCCGCCGTCACCGGGAAGCGCAAGAGATCATCGGACGGAGGC  
GAGCCGACGATCCAGGCGCTGCCTCCTGCTGCCGCGGCGCCAAGAAGCCGAACGGTTCA  
TGCGTTGGTGCAACTTTCCAAATAGGCAGCGCCTTGCAGGGATCGTCACTGGGACTGAGC  
CACCAGATGCTGCTCCACTCTAACATGGGGATGAACTGA

Protein

> **ONAC058**

MVLSNPAMLPPGFRFHPTDEELIVHYLRNRAASSPCPVSIADVDIYKFDPWDLPSKENY  
GDREWYFFSPRDRKYPNGIRPNRAAGSGYWKATGTDKPIHSSGGAATNESVGVKKALVY  
KGRPPKGTKTNWIMHEYRLAAADAHAAANTYRPMKFRNTSMRLDDWVLCRIYKSSHASPL  
AVPPLSDHEQDEPCALEENAPLYAPSSSSAASMILQGAAAGAFPSLHAAAAATQRTAMQK  
IPSISDLLNEYSLSQLFDDGGAAAAAPLQEMARQPDHHHHQQQQHALFGHPVMNHF IANN  
SMVQLAHLDPSSSAAASTSAGAVVEPPAVTGKRKRSSDGGEPTIQALPPAAAAAKKPNGS  
CVGATFQIGSALQGSSLGLSHQMLLHSNMGMN\*

**Gene Structure**

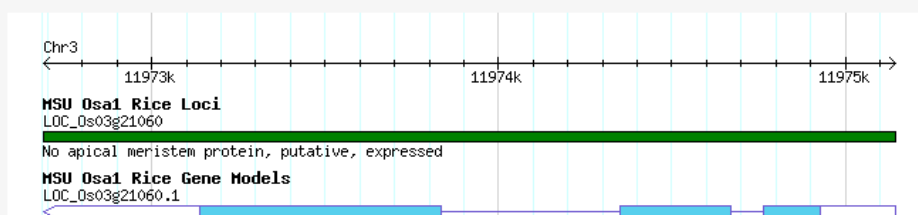

**LOC\_Os01g64310 (ONAC059) sequence information****Genomic sequence length:** 2010 nucleotides**CDS length:** 771 nucleotides**Protein length:** 256 amino acids

Genomic Sequence

> **ONAC059**

AAAAAATCGACCAAACCACGTAGTATTACGCAGTTCGCACACTATACTCCGATCCGGCCT  
 CTCCAACCCAGCTTAGCTTTTCTGCTCCCAGCTGCCAGCTACGTTGCAACCCACCACCG  
 GAAAGCTACACCGTGCCTTTCATATAAGCAGCGCCAGTCGAGCGAGCTCGACCGGCAAT  
 AGCAATAGCGCCAAGACATACAGAGAAGCCACAGACGTCGAGGCAGCTAGCGCGCGGGG  
 AGGACAGGACACTGCAGCAAGTTGGCCGGTGATAAGCGCGCGAACTCGCTGGCAATATGG  
 CCGACGGCGGGCGGCCGGGCTCCCGGTTCCGCTTCTACCCGACGGAGGAGGAGCTGA  
 TATGCTTCTACCTCCGCAACAAGCTCGACGGCCTCCGCGACGACATCGAGCGCGTCATCC  
 CCGTCTTCGACGTCTACTCCGTCGACCCGTTGCAGCTCTCAGGTACCAGCACACGCGTGT  
 ACGTGCATTGCGTTCGTCGTACGTCGCGGAGCGCCGCGTCACCTGTATACACACACCTG  
 CTGCAGAGATTACACACGAGATGCTGGGCGGCGGCGGCGAGGAGGGGAGCCGTGGTTCT  
 ACTTCTGCCCCGCGGAGGAGCGGGAGGCGGGGCGGGCGGCGGAGCCGGACCACGCCGT  
 CCGGGTACTGGAAGGCGGCGGGCACCCCGGGGTCGTCTACTCCGCCGACCGCCGGCCCA  
 TCGGGATGAAGAAGACCATGGTGTCTACCGCGGCCGCGCGCCGTCGGGAACCAAGACCG  
 CGTGGAAGATGAACGAGTACAGAGCATTCCACTACCCCGACGCCTCCTCCGCCTCCGCCT  
 CCAGCGCCGGCGCCCGCGCCACCAAAACCATCTTCCTCCGCAGGTGATTAATCAATACC  
 TAAGTACACGTTGCTTTCTTTGCCGTTGCACATACTAGCCGCATACCTTGTACGTCATC  
 TATCGATCTCTCCGTATAAATCAGAAAAGATATGGCCGGCGGGGGCAAACACTACTTGTTTTG  
 CAGGTCGTTCCCTTTTATTGGCGGCGGGTAAATATCCAAACTTGTATATTCTGAGTGGTT  
 CTTGCCAAACTGCCAATGAACCGGGTGCTCCATCATAAAGCATTGAACCACACGCGTTG  
 ATCCATACGCACCAGTGTATAACTATACAGTACATGCAAGTATGCAACTGGGCGAATGCA  
 TGATTTCGTGACTCCGTCCGTATGCAACTTTTTAAATGGTTGCATGGTTGACGCACTGTTT  
 ATGATTTACTCATGTACGAAGACAATTAATTGACTTGTAAATTAAGTACATTTGAAAACAC  
 GATCAATGACGACTAATTTGTCTTGTGGGCTTTCGCTGTTGCAGCTGAGGAGCGAGTTCA  
 GCCTGTGTCGACTGTACACCAGATCGGGAGGCATCCGCAATTCGATCGGCGGCCGCTAG  
 CGGGTGGTGGTGATGAGAACCCGGGGCCATCCATGGCTGCCGCGGCGGCGTCACCCGAGG  
 AAAACGACGGATCAGGAAGTTCCATGCAGCAACTGGAGCTGATGGATCAAGGTGGCGCCG  
 TTGATCCGGATTGGGACCAGTGGGACGACTTGGCCACCTTGACCGCACTTCTGTACTGGC  
 CTAGAGATTAGGGATGCCAATTGTTTACATGATCTTGCTCGTAGTGCTAACTGTGAAGTG  
 CATGTTACACGTATCAACGACCAAGTGTAGTACATGCTTTTTTTTCTTTTGCCGCGCAA  
 CTCTCCAGTATTAACATAAGAAAAAAAAAATCAGAACACACACAATTTTTTTTGGTTTCT  
 CCAAATATATAATTAATTAATTATTGTTTTCTTCAGTTAATCATATTTTTCTAGTTGGAT  
 CTTGCCCTTGCCCTGTGGGATCTCCTCCAACCTTTCTGATAATAGGATTTGTTTATAC  
 TAGTTCATCCGTCACAAAATGTAAGGTATACATGTATTTTAGATGGTTTCATTAATACAA  
 TACTTCTTTGAATGTTTATTTGTTTATAA

CDS

> **ONAC059**

ATGGCCGACGGCGGCGGCCCGGGCTCCCGGGTTCCGCTTCTACCCGACGGAGGAGGAG  
 CTGATATGCTTCTACCTCCGCAACAAGCTCGACGGCCTCCGCGACGACATCGAGCGCGTC  
 ATCCCGTCTTCGACGTCTACTCCGTCGACCCGTTGCAGCTCTCAGAGATTCACCACGAG  
 ATGCTGGGCGGCGGCGGCGAGGAGGGGGAGCCGTGGTTCTACTTCTGCCC GCGCAGGAG  
 CGGGAGGCGCGGGGCGGCCGCGGAGCCGACCGCCGTCGCGGTACTGGAAGGCGGCG  
 GGCACCCCGGGGTCGTCTACTCCGCGGACCGCCGCGCCATCGGGATGAAGAAGACCATG  
 GTGTTCTACCGCGGCCGCGCGCCGTCGGGAACCAAGACCGCGTGGAAGATGAACGAGTAC  
 AGAGCATTCCACTACCCCGACGCTCCTCCGCTCCGCTCCAGCGCCGGCGCCGCGCG  
 CCACCAAACCATCTTCTCCGAGCTGAGGAGCGAGTTCAGCCTGTGTCGACTGTACACC  
 AGATCGGGAGGCATCCGGCAATTTCGATCGGCGGCCGCTAGCGGGTGGTGGTGATGAGAAC  
 CCGGGGCCATCCATGGCTGCCGCGGCGGTCACCCGAGGAAAACGACGGATCAGGAAGT  
 TCCATGCAGCAACTGGAGCTGATGGATCAAGGTGGCGCCGTTGATCCGGATTGGGACCAG  
 TGGGACGACTTGGCCACCTTGACCGCACTTCTGTACTGGCCTAGAGATTAG

Protein

> **ONAC059**

MADGGGRRAPGFRFYPTTEELICFYLRNKLDGLRDDIERVIPVFDVYSVDPLQLSEIHHE  
 MLGGGGEEGEPWFYFCPRQEREARGGRPSRTTPSGYWKAAGTPGVVYSADRRPIGMKKT  
 VFYRGRAPSGTKTAWKMNEYRAFHYPDASSASASSAGAAAPPNHLPPQLRSEFSLCRLYT  
 RSGGIRQFDRRPLAGGSDENPGPSMAAAAASPEENDGSGSMQQLLELMDQGGAVDPDWDQ  
 WDDLATLTALLYWPRD\*

**Gene Structure**

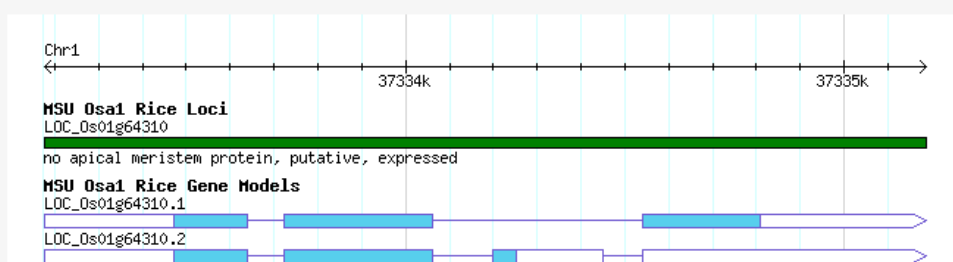

**LOC\_Os12g41680 (ONAC060) sequence information**

**Genomic sequence length:** 5610 nucleotides

**CDS length:** 1002 nucleotides

**Protein length:** 333 amino acids

Genomic Sequence

> **ONAC060**

ACAATTTGCAACACACACACACATGACACAAGCACACACACCCCTATTCATACACATA  
 CTCCATATGTAGCCCTTTCTTGGTTTCTCTCTCTAGCAGCTACTACCTTCAATTTCTT  
 AATTCTCTCTCTTCTTGTCTTCTTCTTCTCCTCCATATAGCTAGCTAGAGAGAGAGAGA  
 GAGAGAGAGAGGAGGTGATCAAGGGGGGGAGGTTGATCGATGTCGATGATGAGCTTCTTG  
 AGCATGGTGGAGGCGGAGCTGCCGCCGGGGTTCAGGTTCCACCCGAGGGACGACGAGCTC  
 ATCTGCGACTACCTGGCGCCCAAGGTCGCCGGCAAGGTCGGCTTCTCCGGCCGCGCCCG  
 CCCATGGTCGACGTCGACCTCAACAAGGTCGAGCCATGGGACCTCCCCGGTAATAATCAG  
 TTAGCTTCACATGTTAATTTCTTAGAGTTCTCTTCTATATTAATTCTTGACATGTAG

TAAGTATATGTTAATTTCTTCTTGATTGATCGATGAGCCGATGTCTTGCTGATTTTATAT  
 ATCTTGACCCCTTTTCTTTGATTACATATCTTAATTTTCTCCCCCAAGCCTTTTATGT  
 TTTTTTATCACTTTTAGTTTCCCAATATTTTTTTTGATGATCTTGTGTGATCCATTATT  
 TCTAGTTGGAACCTGGGAGCAACTTGTGTTGCTTTAGTGCCAAGAAACCAGCCAAAGTCTT  
 CCAATGCATGTTGTGCTCTTGTGTTGTCAATGACAATTATGCCCTTACGCTAAAAAAAT  
 ATAGGCTAATTAATTTCTGCTATATACATACGTGTGATTCTTATTTAATTTGTCTTCTAT  
 TCTATACTGTTTTTTTTTAATTCAATTACATGTATATTTGACAGATCCTCGGTATTGAATT  
 TGAACAAATATTAGGCAAACTAGTAGTATATATTATGCAATCGATGAACGAGAAATTAAT  
 GATATTCCAATTCATTTTCTCGTGCTGAATTAATGATTTGTTTGAGAGGATCGATATATC  
 TTAATTACGCGTATTTTTGAGAAAAAGAGAAACAGCGTAGAGAGGCAGTGTACGTAAAAT  
 CAACGTCATTGTCAGGTAGGCGTATATAAATTGATAGAGGACCATATCAAGAGTGACT  
 TCAATTATGGAAGTACAGAGATAGATGTATCTATTGCCTATATTAAGGTCATTAAATTA  
 GTGAAGACTAAGCTTTTGCAGTTTTAGTTTTTTTTTCTCCTTATAAAAAAGTGGAGTTAAT  
 TCGATTTCCATGGTCATGTTTTTCATATTTGTGATGTCTCTAGTTGTACAAATTAAATAA  
 ATTCCGTTGCTCTCTTGAAGCCATTTATTTATTGTCATGTACGGTAAAATTGAAAAAAAA  
 CTGTTTCATATCACTTCCATTTCTGTTATCAAAAGTCAATGTTTCGCATGTGGTTCAATTCA  
 TTCATCAGTTAAATGGTCTCCAGTGAAGCACTGATTACTCTACTATTTAATTGATAGGGA  
 ATGTTAATTAACCTTTGTAGTTTCAATTCTCGGAAAATAATTTCTCTACAGCAGCATTAA  
 GATTACCTTGTTTTAATCTAAATACACAGTATGTAAAATATATATGCAGCTTGTCTGTA  
 TATGACAGTACCGACACAAAATTAAATTATCCTCCTTTGTCTTGAATAGGTGGATCTTTAT  
 CAATTATCGAATACTGAAGTATTATTATTAAACAATAATAACAAATCCAATAAAATAATT  
 TGCAACAAATCTAGAGATATATGTGGTAATAGGGCTAAGAAAAGAAAATGAGAAAATGG  
 TAGCTAGCTCGATCGACTACGACATCTCATCATAATGGAAAGGAGGAAATTCTCTCACC  
 ATTATATATACAATTTGGCATTTCCTCCATTTCCAAAGAAGGAAATATTCCTTTATTCC  
 AAACCTAATTTAATTTGCAGCCACACTTTAATTATAACGTCTTCTAGACTAGACGATAT  
 CCTTCTCTCTCAATGCATCCACTTTCAGTTTGTGTCCAAAATAATCTTTTTTTTAGATGT  
 CCAAAATTAAACAATCATTTTTGTAGGGTGGGAGCTGGAAAAGACACACGTTTCATAGGT  
 TCTGCAATTATTAAATTTCCATCGATTTTTATTAATGAGATGCGGCATGACATGTGTACT  
 AATTGCATTAGCTAAAACCAGATGTAAAATAATTAATTAATCGACCTAACCTTATGTGTG  
 TTTCGATTCAGATAATCACATTAGCTAGCTAGCTACAAGAATCTTTCATCACATCAACC  
 TAACCTTTGTAGGAGTAAACAATTAATAATTTGTGACAATATTAACATCACTTGTAAACT  
 ACCCAATTAATCCCAATCACATCATCCCATCAACCTAACCTTTCTAACAGCAAACACA  
 TTTAATAATTTGTGACAATTAACATCAGTGTAACCTACCCCAATGAATGTCAAATCCCCA  
 AACTACCCCAATTAATCCCAAGTCCCATAAACCTAACCTTTCTAGCAGCAAACACATTTA  
 GCAATTATTTGTGATAATTAACATCATTGTAAACTACCCCAATGAATGTCAAATCCCCAA  
 TGATTAATGCAGTAAAATAATGCCAAATAATTAACATCATTGTGAACTACCAATGAATTA  
 ATGCAGTGAAAACTTTTAAAAAAGAATAACCAAATAATTAATGTAATGAGTTTTTTGAAT  
 AAAAAATTAGAAAATAAAAAAGAAAAAATTGGCGTCGCCCCGACTCGAACCGGAGACCTTCA  
 GTGTGTTAGACTGACGTGATAACCAACTACACCACGACACCTCTTGATTAGACAGTGATG  
 TAGTAATTTAATTACCTTATTTAATATAAGATTATGAGAACATCCTATCCTAACTAATTC  
 CTCTCACTGTCTAATCCTACCATGTGAAGTGCACACCAAGCCGATGGCGACCAGCATGCA  
 TGCATGCTTGCCATCAACAATGTCGCAACAACTGCAAATCACATCTTACGCATGGGATC  
 TCAGCACACACACTCTGTATGGGCCTAACACGTGTTGATGCATCCAAATTTCAAGTAAAA  
 TTAACCTCTCCAATAGCTCAGCATATCTCTCCCTTTCTATCAAGAACCAGTGTGATTGTGA  
 CCAAAAGGGGATTCATCATGGATCACCACATCAAGCACCCTACATACTACTGTCCAACA

ATAACACCAAGAAAAAGTACAATTTTTTTAGCTGTGGACAGGAATGTGTGATAACTTTAT  
 TATTATCTTTCAATTAAGATAATTGTTTTGGTTATTAATTGTTGGTGTATTTATAATTT  
 TATATGTTTTTTTTATGATAAGAGGTGGCGTCGGTGGGCGGAAAGGAGTGGTACTTCTTC  
 AGCCTGAGGGACCGAAAAATACGCGACGGGGCAGCGTACGAACCGAGCCACGGTTTCGGGG  
 TACTGGAAGGCCACGGGGAAGGACAGGGTGGTGGCACGAAGAGGGGCACTTGTGGGGATG  
 AGGAAGACACTGGTGTCTACCAGGGGAGGGCACCCAAGGGAAGGAAGACAGAGTGGGTG  
 ATGCATGAGTACAGGATGGAGGGTGTGCATGATCAACAAGCTTCCAGCTTCTCCTCCAAG  
 GTATGTATGGTGAAATTAATTGTTCACTATGTCCTGTAAAATGTTTCACAACTCACTCAT  
 GATTATTCCCTAATAAATGGTATATTTCTTTTCGAAAACCTAATGATTATTACTATCTTT  
 GTTTCAAAAGACTTTATTTCTAGCTATGCAACTGAACAAAGTACTTTTTTTAGGTGCATAG  
 TTTAAATAAAGTTTTTTGGTAGTAATTGCTAAGCATATGTACACGACAAGTTGTGAGCT  
 TAATTCCTAGCATAGAGACCAACTTGTAGTGCAGTGTGATTGTATTTATACAACAGTTAT  
 TGTCAGACTTTTGGGCATAACCCCTCTCTCTCTCTCTCTCTCTCTCTCTCTCTCTTA  
 AAAGGACTTTTGGCATACTGTACGTCCCAAATAATCCTCACAAGTTGTCACTTTTCATTG  
 ATTCATTTGTTTGTGTTTGGCACACTGTTTATCATTTAATTATGGAGTGCTACTTGCTAAT  
 TATTTTTTTTCTTGGGCACACCGTTTTTGCCTGACAATTTTATATTTGTGCACCGGTCCA  
 CTAGTTTGCTCACATTAATCTTGTAAATACTAATTTTAGTCTTTTTTTAAAAAAGGGC  
 ATAAATATAAGACCAAAACGGTTTTCTAGAATAATATAGTAGATTCAAAGCAGTGATCCCT  
 GCAAACAAATTATTACAATTGAATCCCTATCAAGCTGCAAATATGCACATGCTTCATCAT  
 TGACTAAAAAATAGCAAAAAAGGTGTAAAAATTTAAATGGGTAGAAACATGCATGGTTGT  
 TCATCAGTAGCCAAATTAATTTGTCTTCATCAATAGGTCAAGTGATGGAACCAGAGCTAC  
 TACAGTAACAATATCAATAAGATTGTTTTCATATCTATAGGCCATGTTTTCATCATTGAT  
 CATTTTTGACCAACACATAGCAAAAAAGTGTTAATAGTTTAAATGGATTAAAAAATCCA  
 TGGTTCATCAGTAGGCCAAGTGAAAAAGGGTTGTAATTAATGTATTTGTCTTCATCAATA  
 GGCCAAGTGAATAAGTGATGGAATCAGAGCAAGTACAGTAAACACTAATCAACAAAATTG  
 TTTTTTCATATCTACCAAAATTACACCTGTCATGAACTGATCAAATGCTTTTCTTGTTCCA  
 TCCACCAATGTGTTGTTTTCAGCAGGAAGACTGGGTCCCTGTGCAGAGTCATCTGCAAGAG  
 GAAATCAGGAGGGGGTGCAACCTCCAAGTCAAGAAGCCTCACCACCACCACCACCACCAT  
 TGTCCATGACACATCCACACCAACCTCCTCACCACCATTGCCACCCCTCATGGACACCAC  
 CCTAGCTCAGCTCCAGGCCTCCATGAACACCTCCTCCTCCTCCGCCATCGCCGCCGTGCG  
 CGCACTTGAGCAAGTGCCCTGCTTCTCCAGCTTCAGCAACAGCATTGCCAGTAACAACAA  
 CAACAGCAACAGTGCTACTGTCAATGCACAGCAATGCTACCTGCCAATTGTCACAGGTAG  
 CAACAACAATGGCATGAGCTACCTGGATCATGGCCTGCCTGAATTTGGCAGCTTCTTGGA  
 CACCCAGAGCTGTGACAAGAAGATGCTCAAGGCAGTGCTGAGCCAGCTCAACTCCATTGG  
 GGGTGAGGTGTTGCCAGGCCTGCCTCCTCCATCTGAAATGGCTGCTGCTGTCAGCTCTTC  
 TTGGATGAATCACTTCTAGGGAAAAATATTATTCAGACAATATAAGAATAGCTAGCTAGC  
 TAGTAGTTGATCTTCAGTGTGTATGATGAATTGATGATTTGATATGGTATACATACTTAT  
 TTGTGTGATGGTACAATATTTATGTGTGAGTATTAATAGAGCATGCCATAGTTTTTCTGT  
 AAGGCATAGGAAAAATTCAGGACTAAAACTATGTAATGATTGCTAAAGTGTGTATACTCAG  
 AAATCAGAAGTAGAGGTTTGCCTGTGCGAAAAATTTTCGGATCGATGATTTTCTGTCTAT  
 CAATTTGTGCATATCTATATGGAGTAGTAT

CDS

> **ONAC060**

ATGTCGATGATGAGCTTCTTGAGCATGGTGGAGGCGGAGCTGCCGCCGGGGTTCAGGTTT



CACCCGAGGGACGACGAGCTCATCTGCGACTACCTGGCGCCCAAGGTCGCCGGCAAGGTC  
GGCTTCTCCGGCCGCCGCCGCCATGGTCGACGTCGACCTCAACAAGGTCGAGCCATGG  
GACCTCCCCGAGGTGGCGTCGGTGGGCGGAAAGGAGTGGTACTTCTTCAGCCTGAGGGAC  
CGAAAATACGCGACGGGGCAGCGTACGAACCGAGCCACGGTTTCGGGGTACTGGAAGGCC  
ACGGGGAAGGACAGGGTGGTGGCACGAAGAGGGGCACTTGTGGGGATGAGGAAGACACTG  
GTGTTCTACCAGGGGAGGGCACCACGAAGGAAGGAAGACAGAGTGGGTGATGCATGAGTAC  
AGGATGGAGGGTGTGCATGATCAACAAGCTTCCAGCTTCTCCTCCAAGGAAGACTGGGTC  
CTGTGCAGAGTCATCTGCAAGAGGAAATCAGGAGGGGGTGCAACCTCCAAGTCAAGAAGC  
CTCACCACCACCACCACCATTGTCCATGACACATCCACACCAACCTCCTCACCACCA  
TTGCCACCCCTCATGGACACCACCCTAGCTCAGCTCCAGGCCTCCATGAACACCTCCTCC  
TCCTCCGCCATCGCCGCCGTCGCCGCACTTGAGCAAGTGCCCTGCTTCTCCAGCTTCAGC  
AACAGCATTGCCAGTAACAACAACAACAGCAACAGTGCTACTGTCAATGCACAGCAATGC  
TACCTGCCAATTGTCACAGGTAGCAACAACAATGGCATGAGCTACCTGGATCATGGCCTG  
CCTGAATTTGGCAGCTTCTTGGACACCCAGAGCTGTGACAAGAAGATGCTCAAGGCAGTG  
CTGAGCCAGCTCAACTCCATTGGGGGTGAGGTGTTGCCAGGCCTGCCTCCTCCATCTGAA  
ATGGCTGCTGCTGTCAGCTCTTCTTGGATGAATCACTTCTAG

Protein

#### > ONAC060

MSMMSFLSMVEAELPPGFRFHPRDELICDY LAPKVAGKVGFSGRPPMVDV DLNKVEPW  
DLPEVASVGGKEWYFFSLRDRKYATGQRTNRATVSGYWKATGKDRVVARRGALVGMRTL  
VFYQGRAPKGRKTEWVMHEYRMEGVHDQQASSFSSKEDWVLCRVICKRKSGGGATSKSRS  
LTTTTTTIVHDTSTPTSSPPLPPLMDTTLAQLQASMNTSSSSAIAAVA ALEQVPCFSSFS  
NSIASNNNSNSATVNAQQCYLP IVTGSNNNGMSYLDHGLPEFGSFLDTQSCDKKMLKAV  
LSQLNSIGGEVLPGLPPPSEMAAAVSSSWMNHF\*

#### Gene Structure

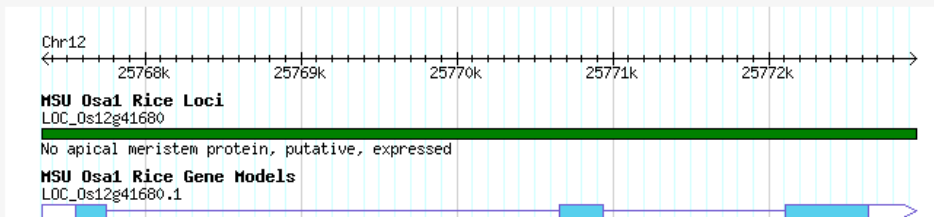

#### LOC\_Os10g21560 (ONAC061) sequence information

**Genomic sequence length:** 5134 nucleotides

**CDS length:** 1182 nucleotides

**Protein length:** 393 amino acids

Genomic Sequence

#### > ONAC061

ACCCGCTCGCGCAATTCGCACGCTCTCCTCGCCTCGCCTCGCCTTCTCTTCTCTCCTCAC  
CTCGCCCGCGTCGTCGTCGTCGTCGTCCTCCGCGGCGGCGGGGAAGCAGCGGGAGGCGGA

GCGGAGCAGCAGCAGCACCACCACCCCGGGCGGGGCCGCGCGCGGTGCTCGCGCGCG  
 TCGACTCCGTGTGGTGC CGGAATCGTCCCTCTCCGCTTTACTCTTGGGTTCGTCATTTCGG  
 TGGGCGGATGCGGGTGGGTTGGATTTCGGTGTGGTTCGTGGGGGGTGGGGATTTCGGATCGG  
 GGGTGATTTTGAGAGGGGGGGATCGGGTTCTTGATTTCGAGGTGCGATTTCGGGAATCGGGA  
 GTTGAGCGGGGGAGGGGAGGAATATTTTCGTGTGGGGTTTGTGCGCGATTCTCCCCGTC  
 GCTTTTGGGGTACCATCCAGGGGACGAGGGAGTCGTTTGATATGGTCGCGTTCATGCTTC  
 TATTTTTGGGTGGCGATCTCCTGTAAAAATTTGGACCCGGATTTCGGGTGGTTCTGTTTGT  
 GGTGAGATTTTCTCGATTTGATTGCTGAGCGGAATATTTTGTGGGTGTTCTTGAATTT  
 TTTTTTTGCGTCTTATGTGGTTGATTGGTTTTCGATTCTTCATTAGTTTATCTTCGCCG  
 CGTTTGTGTAAATGTGGGTAATGTAAAGAACAAAAAATTCAGGGACTAAAATTAGT  
 GTGTTCTGTTATGGCTTCAGCGTTGCTGGTCTGCAGCTGCTGCGGAAGTAGTAATAGATG  
 AGGAAATGCCACCGATTTTTCCAGATTGTTTGATTCTTCTTGCCCTGTTGTTGTGGCC  
 TTGATAAGATCCGGTTATGGCTACTTATTTTATCTTTTATGCCGTTTAAATCAATTAGT  
 TCATGTATCTTTGCTGTACAAATTGTGTGTTATCATTTTGAGTTGTGGCATTTTGTCAGT  
 CCAAGATTCCTTGAGACAACGAACCTTACTAATGATGGCGGTGAGCAGCTACTGAGCTCT  
 GCGTTTGCTTTACCTGATAGTGCTTAATTTGGCAATTGTTAGCTCTGCATAGTGCTACTG  
 TACACGTGGTAGTGTTTCAGTTTTGGTAGGAAGAGCACTAAATTTAAGTACTGCTATGTAT  
 CAGTTATTTCTTTCAGATTGTTTGACCACAGAACAGATACGTTTTTCATGTTATCAATGCA  
 CATCCTTTTAGAAATATGCCTTGGTATTTGTATGTCAACTAAAGAAGCATGTCGGCTAAA  
 ATTGGTTCTATTTTTTCCAGGACAATCATGTCTTCTAAAGTTCCCTGGGTTAGCATTACTT  
 AACACCAGCATAAGCAAATTTTGGAGCGATGAGGAGCTTGTCGATTCTTAGCAGAGAGG  
 AAAGAAGCACACTCTCTGCCAGAGAAATGTATTTGTGGGAATGAACATTTCTCTCATTGAT  
 CCACGTAACCTCAGGTTTGCATCCAATCTATACACAGGATAATTAATGGTATTTTCCAACA  
 AGATTATGGCATATGTGGAATTTGTGGTCTGACTTTCATAATTCAGTCATTATGGACCCT  
 GAAGGCTTCTTTGTTTTGTCTTTTTGATTTGTTATATACTTACTTTACAGCATTGTATT  
 GTATGGTTGAGCAGTATTGCAACATTTTAATTCTCAATAGACAACATAAGAAAATGAATT  
 CTGCATAGAATTGATAACTATTTAGGGTTGAAAGGCATAAACAATATTTTATGCAATGCC  
 AGAAAGAAATATTTGAGCTCTGATGAAAGTGCCATGTTAAGTGCAGGAACACATACTTC  
 TGCCCCATTGATTATGGCACAAATTGCCAGCATGAAGTGCTCATAAACTATAGCAGGATG  
 TTATATGAGAAATAGTTTGGCACTTCACATTAAATTGAGCATTTTGTTTTTTCATTTTTCT  
 TAGCTTGTGCACCAATTGCTTGCCTGCTTTTGCTGGAAAAGTATGAAGTACACTCTTTGA  
 TGATTAAATTTCTGTTCACTGTGTTGCTTGGCTAGAACTTACTCTGCCATCCTTACTAGAT  
 TCTCCAATTATGCAAAATCATTGTTTCCAAGTGAAAATTAAGTTTTCGAAGATGTCAGAA  
 TTCAGTATATGCAATTAATTATCAACTTTTGTTTTTAGTTGGAGTCACTATACAAGCAGA  
 TCATGTGCTTAGATTTTGGGGCTTCAGTTCACTTTCCACACTAAAATGTGCACCTAAGTT  
 GTTGATATGTGTCTCTGCACTCTTCAGTATCCACATCATAACACATAGTACATAAATCT  
 ACTGGAATCATATATTAATAACATTCTTGCATGTTTTAAATTGGTAACCTGGTGCCTGGTT  
 TCAATAAAGATTTGATTGCAAAATTTCTGAGGTATCAGAACTAAAGTTTACTCTTTTTTG  
 CATAGCACAAGTCCACAGTTCACTGTGACCAGCGGTGCTATATCCTAGAGTTAAGCTATT  
 CCTACAATGAAAACCACAATGGTGCTTAATGGCTTATTATCTTGTTAAACCTCAATAAAA  
 GATAATCTGACAGAGATAACTTTTCTTGAGAGGACATATGGTACATGAATTTTTCAGAT  
 GATCCACAATCCCTAAGAATGGAGAAAATGCTATTATAAAGTCAAAAACCGGATACTGG  
 AAAGTTGTTGGCACTGTTAGAATACCGACAAGTACTGTTATTGTGGGTATGAAAGTTTCT  
 CTGGACCATTATGAAGGCGAAGCACCATCTGGTAAGAGAACTGGGTGGGTGATGGATGAA  
 TATCTGATTGAACAGAATGACGAAGCTAATCTACCACAGGTAACCCATGGTGGTTGATTG

ATATCATTTTTTTTCTATAGCATATAAGCTTTTTTTCCAGGGTTGTTGATTGATATCTT  
 TTGTATTTTTTGACAGGACTACAAGAATTTGTGTACAATATTCTTTCAGGGAGACGACATA  
 TTAAATGCTGGAGATAAGCAGATATGTCTGAATGCAAATGTTCCCTAATGAACGCAAGGAA  
 TTTTACCTTCAATATCTTGCTGAACTAGAAGAGCAAAATGCTGCATGGAGCAACCAGGTT  
 TGTATTGTTTTCTTTATTATGTAAGGCATCCTTAGCAATACCCTGGATCTTTTAGTTTTG  
 CACATATTTTTTCTCATTTTAGTGTAAGTATACCTTGATCCATGATTGTCTGTCATGTA  
 AAATTAAGAAATACTCCAGCAATCCTGTCATTGTAATCACTTTTTTATTTTGATTTTGA  
 AGTATTTAAGGTTTTCTCCTTCATAACCATACAAAATCTGTTGTTTGTGAGAGCATGCTC  
 CTATCCGATCATCATTTACTACTTATTGCTTTCTTCTGCATTACAACTGTGAATATTTA  
 GATGTGTGATAATACTAATGAATATCCAATCTACATATGCCAGGCTGTATCTGTAAACGA  
 GCAAGATGTCTCTTCCAGCAAAGGACTGGACGGGCAAAAACTAGTGCTGCTGATGACCA  
 ATCTGTTAATCATGCCCTTCTAGGGAGGGCTACATAGAATTGAATGACTTCTTAAACTC  
 AGATTCGTCCGCATCAACTTCGGAATACTCAAGTCAACGCACTATGATTTCTGAAGAGTA  
 CTTGATTCTGATGCATTTCTGAGGGAGATTAGGAATGACCATAACGCAGCTGATGAAGA  
 ACATACAGACAGCAAGTTCAGCGTAGCTGCAGCTAGTAAATCAGATTGCGTGGTTATCAG  
 TCCACCTGAACAAGGTAACCTTATCCCTTCTGTTGCTAGTTCCAAAAGTAGAGGACGCTAC  
 AAATCTTTGTGTTTGTCTAGAAAAGTAAGTGTAAACAATGCAAACAACCATTTCAAAGTT  
 TGTAAACCATGAAAAATTTGCAAGTAAAAAGCCCAAATGCAATATACTTCACACAAATACTA  
 GAAATCGAGAACTGTTGATAATGCTAATTTTACAGCTGCACTTGCTCATATTGATATGCA  
 ATGTTTATTTGTTTGTCTTATTGCTACTGGTGAAGTTCTTGATTAGCATGCTTGTTC  
 ACAGTATTGTTTCGCATACGAGTAACATGTAAGTTACTCTTGTCTAGAGAGTTAGATGAT  
 TACTTTTCAGCTCATTAACCTTATTTTATTTATCTTGTATAACAATAATTTGTTAGTAGG  
 ATTTATACTGAAGTTGGCATCTCTGTGCGTGACGGGTTTGTAAACAATCTCGATAACCAT  
 GCCACCATAGCTGGAGATTACCGCAAAAGTCAGTGAAAAATGATAAAGTAGACGAACAC  
 TCAAGTGAGGAGCATCCACAGCACAGTCCTACAACTTCCTGTTTCCCAAGTCATGTGAAA  
 CGAAGCCTTTCTAGTAGTTCCAGTAGCTCTCAGGGTACCAGCAACAGCAAGTCTCCCCAG  
 AGACAGAGAGAGCGATCTACCAAAAAAATTGGAAAAATTAGGAAAGTACTGGTGTGTGGA  
 TCATTATAGTCCATTGCATAGCATTTCTATACTCTGTACAGGAAGCATGACATTACGCCA  
 TGCTATTTTGATACGGACTGGTCGCCCTCAACAGATTTATGCCAGATCTTCTGATAGAACA  
 TAGTCAAAGAAGACTGCAAGTTTTGAAGCAACAATGACCAACAATACTACAACTGTGGA  
 AAGTTACATTTTTGTTTTGTTTCATAGTGTGAAGATATCATGACCTTGATGATTCTGTCAA  
 ACTGAAGTGAGCTACCTTGATTCCATTCTTGATTGATAGGGTCAGATATCACTGATACC  
 TGTGTTAGTTCAGTGAAATGAGGATGGCAGTAGTTTCTGATTATCACCAGGTGCTCTCAT  
 TTGTAAACATCTACAGTACAGTTTCATATGATAGAATTCACATTTTAGTAAGTACTAAT  
 ACTGATTGCTCAATACTTAGTTATCCTGCTTGCAATTTGAAGGAGTATAAGCTTTTGATTT  
 ATGAAATCCTCTGTGTGGCAGTCGCCCTGTTGTCTGCTGGTAAAACTAGGATGAGTATAAG  
 CTGGGTTACGTAGATGTTCTCACCTGACTGTAAACATGTTTTACTCTTCAGCTTCAAGTT  
 TCTCCTTGAGTTGTTAATTTCCATGTGAATGAATTACTGTCTACCGTAAGCATCTGGCC  
 ATAGTATGGTTGTGCTTGCTTATGCTATTTTCAGC

CDS

> **ONAC061**

ATGTCTTCTAAAGTTCCTGGGTTAGCATTACTTAACACCAGCATAAGCAAATTTTGGAGC  
 GATGAGGAGCTTGTCCGATTCTTAGCAGAGAGGAAAGAAGCACACTCTCTGCCAGAGAAT  
 GTATTTGTGGGAATGAACATTTCTCTCATTGATCCACGTAACCTCAGAGGACATATGGTAC

ATGAATTTTTCAGATGATCCACAATCCCCTAAGAATGGAGAAAATGCTATTATAAAGTCA  
 AAAACCGGATACTGGAAGTTGTTGGCACTGTTAGAATACCGACAAGTACTGTTATTGTG  
 GGTATGAAAGTTTCTCTGGACCATTATGAAGGCGAAGCACCATCTGGTAAGAGAACTGGG  
 TGGGTGATGGATGAATATCTGATTGAACAGAATGACGAAGCTAATCTACCACAGGACTAC  
 AAGAATTTGTGTACAATATTCTTTTCAGGGAGACGACATATTAATGCTGGAGATAAGCAG  
 ATATGTCTGAATGCAAATGTTCTTAATGAACGCAAGGAATTTTACCTTCAATATCTTGCT  
 GAACTAGAAGAGCAAAATGCTGCATGGAGCAACCAGGCTGTATCTGTAAACGAGCAAGAT  
 GTCTCTTCAGCAAAGGACTGGACGGGCAAAAACTAGTGCTGCTGATGACCAATCTGTT  
 AATCATGCCCTTCTAGGGAGGGCTACATAGAATTGAATGACTTCTTAAACTCAGATTCTG  
 TCCGCATCAACTTCGGAATACTCAAGTCAACGCACTATGATTTCTGAAGAGTACTTCGAT  
 TCTGATGCATTTCTGAGGGAGATTAGGAATGACCATAACGCAGCTGATGAAGAACATACA  
 GACAGCAAGTTCAGCGTAGCTGCAGCTAGTAAATCAGATTGCGTGGTTATCAGTCCACCT  
 GAACAAGGGTTTGTAAACAATCTCGATAACCATGCCACCATAGCTGGAGATTCACCGCAA  
 AAGTCAGTGAAAAATGATAAAGTAGACGAACACTCAAGTGAGGAGCATCCACAGCACAGT  
 CCTACAACCTTCTGTTTCCCAAGTCATGTGAAACGAAGCCTTTCTAGTAGTTCCAGTAGC  
 TCTCAGGGTACCAGCAACAGCAAGTCTCCCAGAGACAGAGAGAGCGATCTACCAAAAAA  
 ATTGGAATTTAGGAAAGTACTGGTGTGTGGATCATTATAG

Protein

> **ONAC061**

MSSKVPGLALLNTSISKFWSDEELVRFLAERKEAHSLEPENVFVGMNISLIDPRNSEDWY  
 MNFSDDPQSPKNGENAIKSKTGYWKVVGTVRIPTSTVIVGMKVS LDHYEGEAPSGKRTG  
 WVMDEYLI EQNDEANLPQDYKNLCTIFFQGD DILNAGDKQICLNANVPNERKEFY LQYLA  
 ELEEQNAAWSNQAVSVNEQDVSSSKGLDGQK TSAADDQSVNHAPSREGYIELNDFLNSDS  
 SASTSEYSSQRTMISEEYFDSDAFLREIRNDHNAADEEHTDSKFSVAAASKSDCVVISPP  
 EQGFVNLDNHATIAGDSPQKSVKNDKVDEHSSEEHPQHSP TSCFP SHVKRSLSSSSSS  
 SQGTSNSKSPQRQRERSTKKIGKLGKYWCCGSL\*

Gene Structure

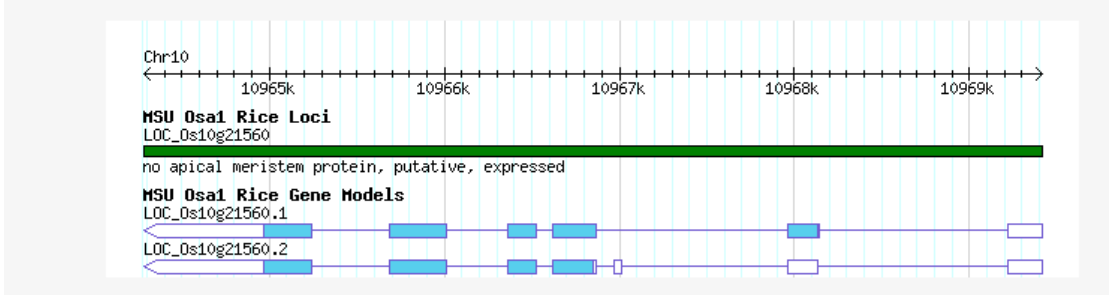

**LOC\_Os05g48850 (ONAC062) sequence information**

**Genomic sequence length:** 1837 nucleotides

**CDS length:** 945 nucleotides

**Protein length:** 314 amino acids

Genomic Sequence

> **ONAC062**

AAGCTTTCCTTCTTCTTTTTTCCCCCTCTCGACGATCTCTCTCTCATCAGGACCCCGGCC  
 TTAAGTTGTTTCTTCCCTATCAGCTCAGGTCTCTCTCGATCTCTCCTAGCTAGATAGATA  
 GCTTAATTAGCAGCTAGAGATGTGTCTCTAGCTAAGCTAACTAGCTAGTAGGCTTCTTCT  
 TTTAATCCGGCATTGTTCTTGGCTGCTGGTCTTAGTTTTTGGCTGTCATGTATGGAGTTA  
 GTGGTAAAAATACTAGGTTAATTAATAATATAAGGCGTGTGTATATATTGGTGTGGAGGAG  
 GAGGAGAAAGGGGTTGGCCGGAGAGATCGATGACGTGGTGCAACAGCTTCAGCGACGTC  
 CGCACCGCCGTGGACAGCAGCTTGTGCGCCGGCCGCCCGTGGCCGCCGCCGCGGGGAAG  
 AAGGCGGCGGCGTGCCTCGCCGTCCCTCGTCAAGATGTGCCCCCTCTGCGGCCACCGCGCG  
 CGGTATGAACAGGTATATATACTGCGTGATCAAGATCATGCCTTCTTCTTCTTCTTTTTT  
 TCTGAATGCAACAGCCAACAGCTATAAATTCAGCAAGTGATAACTGATCATATATACTGC  
 GTAGTACTACATTAATTCTTCTTTTGGTTGAGATGCAAATCAACAAATTAATTAAGATGA  
 ATTATTGCAGGAGACGACGACGATCCAGGACCTGCCGGGGCTGCCGGCCGAGTGAAGTT  
 CGATCCGACGGACCAGGAGCTTCTTGAGCATTGGAAGGGAAGGCGAGGCCGACTCGAG  
 GAAGCTCCACCCCTCTCGTCGACGAGTTCATCCCCACCATCGAGGGCGAGAATGGCATCTG  
 CTACACCCATCCCGAGAGGCTTCCCGGTGGGTGTAAATTCCTTTTTTCTTACAGTGGAATC  
 AGAATCGGTAGCTTAAAAATCTTGATAAAATGAGTTGATCGTTGCGTGCATTTGTGGGTGT  
 AAATAAATTTGAAAAATTAATTCAGGTGTGAGCAAGGACGGGCTGGTGAGGCACTTCTTC  
 CACCGGCCGTGCAAGGCGTACACGACGGGGACGAGGAAGCGGCGGAAGGTGCACAGCGAC  
 GAGGTGACGGCGGCGAGACGCGGTGGCACAAGACCGCAAGACGAGACCGGTGATGGCC  
 AACGGCCGGCCCAGGGGCTACAAGAAGATCCTCGTCCTCTACACCAACTACGGCAAGCAG  
 CGCAAGCCGGAGAAGACCAACTGGGTGATGCACCAGTACCACCTCGGCTCCGACGAGGAG  
 GAGCGGGACGGCGAGCTCGTCGTCTCCAAGGTCTTCTTCCAGACGCAGCCAGGCAGTGC  
 GGCTCCACCGCCGCCGCCGCCGCCCAAGGAGGCCTCCGCCGCCGTGCGCGCCGCCGTG  
 GTGAACAGCAACTACTCCATCGTCCATGGCCATCAAGGTGGTGGTGGTAGCTTTCTC  
 AAGGAGGCAAAACGTTGTGCACGAGTTCTACGACCCGGCAGCAACGATGGGTACCGGCCA  
 CCTGCTCCTGCTGCGCACTTCGCGCCAACTTCGCGGTGCACGCGCAAGGAACAGCTTT  
 GGTGGCCCTTGAAGGAAAAACCAAAATTACACAAAATCTAAACATTACCGTTTATACCGA  
 TATGATTACATAGGTGCCATTATATTACATTCTTAACCTTACATTATCCATCAGTTAT  
 TTGCAGTTTTGTTCAAAGTTGTTATATCGTTTCCGATGCTATACTGTGCAAAGATTATTA  
 CTACACGCCGTTCTAACTCGAAAAATGCAATTAATGTATCAGTTTGTACATGTATACATG  
 CACACGGAAGAGGTCCTGATGATGCATCACTTCATAT

CDS

> **ONAC062**

ATGACGTGGTGCAACAGCTTCAGCGACGTCCGCACCGCCGTGGACAGCAGCTTGTGCGCG  
 GCCGCCGCCGTGGCCGCCGCCGCCGGGAAGAAGGCGGCGGCGTCGCTCGCCGTCTCGTC  
 AAGATGTGCCCCCTCTGCGGCCACCGCGCGCGGTATGAACAGGAGACGACGACGATCCAG  
 GACCTGCCGGGGCTGCCGGCCGAGTGAAGTTCGATCCGACGGACCAGGAGCTTCTTGAG  
 CATTTGGAAGGGAAGGCGAGGCCGACTCGAGGAAGCTCCACCCTCTCGTCGACGAGTTC  
 ATCCCCACCATCGAGGGCGAGAATGGCATCTGCTACACCCATCCCGAGAGGCTTCCCGGT  
 GTGAGCAAGGACGGGCTGGTGAGGCACTTCTTCCACCGGCCGTGCAAGGCGTACACGACG  
 GGGACGAGGAAGCGGCGGAAGGTGCACAGCGACGAGGTGACGGCGGCGAGACGCGGTGG  
 CACAAGACCGCAAGACGAGACCGGTGATGGCCAACGGCCGGCCCAGGGGCTACAAGAAG  
 ATCCTCGTCTCTACACCAACTACGGCAAGCAGCGCAAGCCGGAGAAGACCAACTGGGTG  
 ATGACACAGTACCACCTCGGCTCCGACGAGGAGGAGCGGGACGGCGAGCTCGTCGTCTCC

AAGGTCTTCTTCCAGACGCAGCCCAGGCAGTGCGGCTCCACCGCCGCCGCCGCCGCCGCC  
 AAGGAGGCCTCCGCCGCCGTGCGCCGCCCGTGGTGAACAGCAACTACTCCATCGTCCAT  
 GGCCATCAAGGTGGTGGTGGTGGTAGCTTTCTCAAGGAGGCAAACGTTGTGCACGAGTTC  
 TACGACCCGGCAGCAACGATGGGTTACCGGCCACCTGCTCCTGCTGCGCACTTCGCGCCA  
 AACTTCGCGGTGCACGCGCAAGGAACAGCTTTGGTGGCCCTTGA

#### Protein

##### > ONAC062

MTWCNSFSDVRTAVDSSLSPPAAVAAAAAGKAAAASLAVLVKMPSCGHRARYEQETTTIQ  
 DLPGLPAGVKFDPTDQELLEHLEGKARPD SRKLHPLVDEFIPTIEGENGICYTHPERLPG  
 VSKDGLVRHFFHRPSKAYTTGTRKRRKVHSDEV DGGETRWHTGKTRPVMANGRPGRYKK  
 ILVLYTNYGKQRKPEKTNWVMHQYHLGSDEEERD GELVVSQVFFQTQPRQCGSTAAAAAA  
 KEASAAVAAAVVNSNYSIVHGHQGGGGGSFLKEANVVHEFYDPAATMGYRPPAPAAHFAP  
 NFAVHAARNSFGGP\*

#### Gene Structure

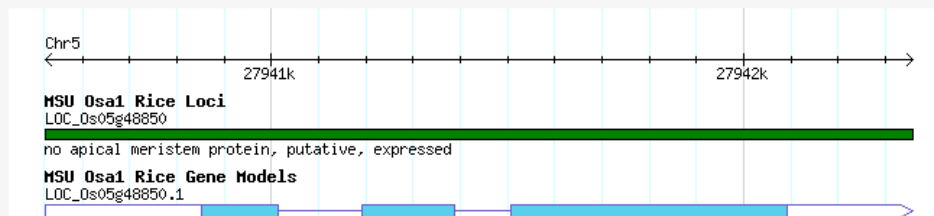

#### LOC\_Os08g33910 (ONAC063) sequence information

**Genomic sequence length:** 2025 nucleotides

**CDS length:** 1158 nucleotides

**Protein length:** 385 amino acids

Genomic Sequence

##### > ONAC063

AGTGATCAACTGTGTCTTCACCTCACTGGCTTCATCCCTAGAAGCCATTCAGTACTACT  
 GCACAAGTAGTACAGGAGCATCTTTTGTGAGATTTGCTTCAGGCTTGATCTTTTCTTGTG  
 TGAGATATGGAGGAGAGAAAATGATGTCAACATGGACAAGTCAGATGAGATCCTCCTGCCT  
 GGATTCAAGTTTCATCCTACAGATGAAGAGCTGGTTAGCTTCTATCTCAAGAGGAAGATC  
 CAGCAGAAGCCTATCTCCATTGAGCTCATCAGGCAGCTTGACATCTACAAGTTTGATCCT  
 TGGGATCTCCCAAGTAAGCTTGCACCTACTTGTCTTACTTCTGAACCTTAATGAATGG  
 ATTCAATCATTCAAACACAAAACTCCAACTTTAGAAGTTCATTTTTAAAGATAGCAAG  
 AGGAAGAGAATATTTTCTTTGTAGTTTAAGGACATCTTAGGAACTGCAAATTAACATAA  
 GAGAAAACTAACCGGCTTATGTGATGTCTAGTTGAATAGAACTAGTGACACTTCTCTG  
 TTGAAAGTTGAAAGTAAAGTCACCAATATCATTTTTGTTGTAAGTATAAGTTATACTC  
 GTAAATCACCTTACTGCAATGTGTCTGACTTCACTATGTTGATCATTGACAGAGCTTGCG  
 AGCACGGGTGAAAAGGAGTGGTACTTCTACTGCCCCGAGGGACCGGAAATATCGCAACAGC  
 GTGAGGCCGAACCGGGTGACAACAGCTGGGTTCTGGAAAGCCACAGGAAGTACAGGCCA  
 ATCTACTCCACTGAGGGTACCAAGTGCATAGGCCTCAAGAAGTCCCTTGTCTTCTACAAG

GGCAGAGCTGCAAGAGGGATCAAGACTGACTGGATGATGCATGAGTTCAGGCTTCCTACG  
 CTCACCGATCCATCGCTCCCGAAGAAGCCGATTGACAAGAACATTCGCTCAACGTAAGC  
 ATTCATTTCGCAATTTGTTATAGTCTTATAGAACTGAATTCCAAGTTTTGTCAAATTCT  
 GAGGGTGCACTGTTCTGTTTCTGAAAACAGGACTCCTGGACAATCTGCAGGATCTTCAAG  
 AAGACCAGTTCCATGGCACAAAGGGCACTCTGTCAGACCTGGGGAGCTCAATTGCCTGGA  
 ACAATTGATCCAGACATCTTCTCTACATTGCAATCTGTGCAAGCTTCACAGTTTGCCCTG  
 GAGAGTTCCTCCTGCTCATTGCAAGCTGCAGCAACGGCAGCTCATCAGATCACTAGCAAG  
 TATGCATTGCAAGGTAATAATAATAATCAGCAGCAGCAGCAACAGCACAAAGCCTAGCAAT  
 CCACTAGATGGATCTTCATGCAAGGTCATAAACTTCAACTGCAGTCAATCTGCAGAAGTC  
 CAGAACTCCCAGATCATACTGCCATTTGAGGCACACACATCGCAGAAGACCGCTACGCCG  
 CTGCTCTTCGACACGCAGTTTGGGCAGCCTGACCAGATCAGCAGATTTGTGGTCGATTCA  
 TCTGTAAATGCAATGGAGGAGGCATCAGCAACAAGAGCCAAGATCCATCAGCAAGAAAG  
 CCTGGCAGTGGCTTCAGCATGAACAGTGACTGGGATGGTGTGGCAAGAATCAACTTCCCG  
 TTCGATTTAGGAGCAGATTCTTCAGAAGATTGGAGGAGCAGCATACCTTGGGAATCCTTC  
 CTTAGCCCAACTACTGTCCATGCTGAGATGCCAACTAGCTGCAGAGGAATGCCAGGGGT  
 GTTGTTACTAATATTATTCAGAGATATAGATGTACAAATACAGTGAGTCACCTTCATCTG  
 TTAGCATTTCTGTTAGCAACAAAAAAAAAAAAAGGTATTGTTTCTTCAGTTTTGATTAGAT  
 GTACTGTACATACTGTGAGATATAGGAGTACTTGTTAACAGCAAAGCTAACAGAGAGAAG  
 GTTACTTTGGTTGTGTTGTACATACATTTTCGAGTTTCTGAGTGCTGTGAGAGTGTGATG  
 AGTATTGTATTGTCAGTAGAAGAAATATATGTGAATTTATATGGC

CDS

> **ONAC063**

ATGGAGGAGAGAAATGATGTCAACATGGACAAGTCAGATGAGATCCTCCTGCCTGGATT  
 AGGTTTCATCCTACAGATGAAGAGCTGGTTAGCTTCTATCTCAAGAGGAAGATCCAGCAG  
 AAGCCTATCTCCATTGAGCTCATCAGGCAGCTTGACATCTACAAGTTTGATCCTTGGGAT  
 CTCCCAAAGCTTGCGAGCACGGGTGAAAAGGAGTGGTACTTCTACTGCCCGAGGGACCGG  
 AAATATCGCAACAGCGTGAGGCCGAACCGGGTGACAACAGCTGGGTTCTGGAAAGCCACA  
 GGAAGTACAGGCCAATCTACTCCACTGAGGGTACCAAGTGCATAGGCCTCAAGAAGTCC  
 CTTGTCTTCTACAAGGGCAGAGCTGCAAGAGGGATCAAGACTGACTGGATGATGCATGAG  
 TTCAGGCTTCCTACGCTACCGATCCATCGCTCCCGAAGAAGCCGATTGACAAGAACATT  
 CCGCTCAACGACTCCTGGACAACTCTGCAGGATCTTCAAGAAGACCAGTTCCATGGCACAA  
 AGGGCACTCTGTCAGACCTGGGGAGCTCAATTGCCTGGAACAATTGATCCAGACATCTTC  
 TCTACATTGCAATCTGTGCAAGCTTCACAGTTTGCCCTGGAGAGTTCCTCCTGCTCATTG  
 CAAGCTGCAGCAACGGCAGCTCATCAGATCACTAGCAAGTATGCATTGCAAGGTAATAAT  
 AATAATCAGCAGCAGCAGCAACAGCACAAAGCCTAGCAATCCACTAGATGGATCTTCATGC  
 AAGGTCATAAACTTCAACTGCAGTCAATCTGCAGAAGTCCAGAAGTCCCAGATCATACTG  
 CCATTTGAGGCACACACATCGCAGAAGACCGCTACGCCGCTGCTCTTCGACACGCAGTTT  
 GGGCAGCCTGACCAGATCAGCAGATTTGTGGTCGATTTCATCTGTAAATGCAATGGAGGA  
 GGCATCAGCAACAAGAGCCAAGATCCATCAGCAAGAAAGCCTGGCAGTGGCTTCAGCATG  
 AACAGTGACTGGGATGGTGTGGCAAGAATCAACTTCCCGTTTCGATTTAGGAGCAGATTCT  
 TCAGAAGATTGGAGGAGCAGCATACCTTGGGAATCCTTCCTTAGCCCAACTACTGTCCAT  
 GCTGAGATGCCAAACTAG

Protein

> **ONAC063**

MEERNVDVNMDKSDEILLPGFRFHPTDEELVSFYLRKRIQQKPISIELIRQLDIYKFDPWD  
 LPKLASTGEKEWYFYCPRDRKYRNSVRPNRVTTAGFWKATGTDRIYSTEGTKICGLKKS  
 LVFYKGRAARGIKTDWMMHEFRLPTLTDPSPKKPIDKNIPLNDSWTICRIFKKTSSMAQ  
 RALCQTWGAQLPGTIDPDIFSTLQSVQASQFALESSCSLQAAATAAHQITSKYALQGNN  
 NNQQQQQHHKPSNPLDGSSCKVINFNCSQSAEVQNSQIILPFEAHTSQKTATPLLFDTFQ  
 GQPDQISRFFVVDSSVNANGGGISNKSQDPSARKPGSGFSMNSDWDGVARINFPFDLGADS  
 SEDWRSSIPWESFLSPTTVHAEMPV\*

**Gene Structure**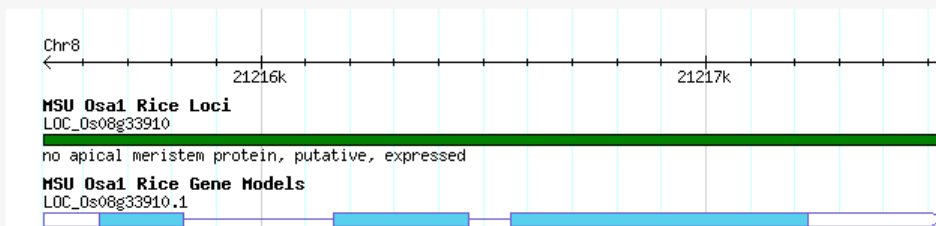**LOC\_Os03g39050 (ONAC064) sequence information**

**Genomic sequence length:** 1442 nucleotides

**CDS length:** 1329 nucleotides

**Protein length:** 442 amino acids

## Genomic Sequence

> **ONAC064**

ATGGCGGGCGCGGATGGGCTCCCTCCCGGCCCTCAGGTTTCGACCCCAGCGACGACGAGCTC  
 GTCTCCCGCTACCTCCTCCGTCGCATCCAGCAGAAGCCCCTCCCGCTCGACGGCGTCATC  
 GTGGATGCCGATCCCTGAGCGTGCCGCCATGGACGCCTCTTGCGGATCACACCCGAGGC  
 GACGAGGCCTTCTTCTTCGCGGGGACGCGCCAAGAATGGCAAGGGAAGCGACAGAAG  
 CGAACCGTGGAGGGCGGAGGGTCTGGCAGGGGACGCGATGGCCGTGGATGGCGAGCGG  
 CTGGTCGTCCAGGCGACGGTGGAGGCGGCGTCGACGGCAGCGGCGGCGGCGGCTGGAG  
 ATCACGTGGCGCAAGTATGTGCTGAGCTTCTTCGCCGAGGGTGAACAGGGCAGCTCGGGC  
 TGGGTTATGCACGAGTACGCCGTCACGTCGTCGGCTGACCTCGCCTCGTCGCCGCTCCGG  
 CTGTACCGCGTCAGGTTCAAGAGCGCAAGAGGGAGCCGAGTGTCTGGACTCCACGATG  
 ATGAAGACGGCGGCGATCAAGAACGCGCGGCTCCCCGGCGGCGGTGGCTCTTCCTGCAG  
 CCGACGGCACCAGGAGGCTCCTATGGCGTGATCGACGGGGAACCTTCGCTGGTGTAC  
 ATTGTCTTCCCGATCAGATCGTTCCTCCAGCAGAAGAAGCTGATGCCACTGCTGGTGCAG  
 TCGACGAGGAGCGCTGGTCGCCACCACAGCCCGCTTCCCCTACTGCTGCTCTGGTGAAGC  
 AGAACTCCTACGACCTGATGGTCAATTCGTCACTGCTGTTTTCTGATCTTCCCGACAGAA  
 TCGATGACGATGACCTGTCTGTGTCGAAACAGAGGGCACCGAGCTGTCCGAGCAGGGCT  
 CCTCCGGCGTGATCGACGACGATTATTGGCGGGTGTTCATGGACTTTCCGACCTGATCG  
 CGCTGCCAGCATAGGAAGCCGATGCCACCGGTGGTGCAGAGAGAGAAGAGATCGCTCTGC  
 TCGACGAGGAGCGTGCCCGCAACCACAGCCCGCTCCTCCTACTGATGCTCTAGTGCCAC  
 CACTGCAGGGCCAGAACTCCTACGACGTGATGGCCGATTCGTCACTGCTATTTGCTGATC  
 TTCCCGGGAGAATCGATGACGATGAGCTACAGCGATCTCTGCGTGTGTGGACATGCCTG



ACCTGTTCTTGTGCGACAGAGGAAGCCGGTGCCGGTGGTGGTGGCGCAGCTCCAG  
 TGCTGAACAAGCAGAGTAACTCCTCACCTTTGGGCGTCATGGACAGCGAGGTGCCGATTG  
 TGTGTCTGATCTAGAGTTCCCAGAGAGCATTGATGAAGTGCTTAGCTACATTGACTTCG  
 CCACGGATGACTGCCTCGATTTCGACATGGACGAGCTGTTTTCCGATATGCCAGCAGACT  
 AG

CDS

> **ONAC064**

ATGGCGGGCGCGGATGGGCTCCCTCCCGGCCCTCAGGTTGACCCCAGCGACGACGAGCTC  
 GTCTCCCGCTACCTCCTCCGTCGCATCCAGCAGAAGCCCCCTCCCGCTCGACGGCGTCATC  
 GTGGATGCCGATCCCCTGAGCGTGCCGCCATGGACGCCTCTTGCGGATCACACCCGAGGC  
 GACGAGGCCTTCTTCTTCGCGGGGGCACGCGCCAAGAATGGCAAGGGAAGCGACAGAAG  
 CGAACCGTGAGGGGCGGAGGGTTCTGGCAGGGGCAGCGGATGGCCGTGGATGGCGAGCGG  
 CTGGTCGTCCCAGGCGACGGTGGAGGCGGCGTCGACGGCAGCGGCGGCGGCGGCCTGGAG  
 ATCACGTGGCGCAAGTATGTGCTGAGCTTCTTCGCCGAGGGTGAACAGGGCAGCTCGGGC  
 TGGGTTCAGAAGCGCAAGAGGGAGCCGAGTGTCTGGACTCCCACGATGATGAAGACGGC  
 GGCGATCAAGAACGCGCGGCTCCCCGGCGCGGCGTGGCTCTTCCTGCAGCCGACGGCACC  
 GACCAGGGCTCCTATGGCGTGATCGACGGGGAACCTTCGCTGGTGTACATTGTCTTCCC  
 GATCAGATCGTTCCCCCAGCAGAAGAAGCTGATGCCACTGCTGGTGCAGTCGACGAGGAG  
 CGCTGGTCGCCACCACAGCCCGCTTCCCCTACTGCTGCTCTGGTGAAGCAGAACTCCTAC  
 GACCTGATGGTCATTTTCGTCACTGCTGTTTTCTGATCTTCCCGACAGAATCGATGACGAT  
 GACCTGTCTGTGTCGAAACAGAGGGCACCAGCTGTCCGAGCAGGGCTCCTCCGGCGTG  
 ATCGACGACGATTATTGGCGGGAAGCCGATGCCACCGTGGTGCAGAGAGAGAAGAGATC  
 GCTCTGCTCGACGAGGAGCGCTGCCCCGAACCACAGCCCGCTCCTCCTACTGATGCTCTA  
 GTGCCACCACTGCAGGGCCAGAACTCCTACGACGTGATGGCCGATTTCGTCCTGCTATTT  
 GCTGATCTTCCCGGAGAATCGATGACGATGAGCTACAGCGATCTCTGCGTGTGTCGGAC  
 ATGCCTGACCTGTTCTTGTGCGCAGACAGAGGAAGCCGGTGCCGGTGGTGGTGGTGGCGCA  
 GCTCCAGTGCTGAACAAGCAGAGTAACTCCTCACCTTTGGGCGTCATGGACAGCGAGGTG  
 CCGATTGTGTTGTCTGATCTAGAGTTCCCAGAGAGCATTGATGAAGTGCTTAGCTACATT  
 GACTTCGCCACGGATGACTGCCTCGATTTCGACATGGACGAGCTGTTTTCCGATATGCCA  
 GCAGACTAG

Protein

> **ONAC064**

MAGADGLPPGLRFDPSDDDELVSRYLLRRIQQKPLPLDGVIVDADPLSVPPWTPLADHTRG  
 DEAFFFAGARAKNGKGRQKRTVEGGGFQQGQRMVVDGERLVVPGDGGGGVDGSGGGGLE  
 ITWRKYVLSFFAEGEQGSSGWVQKRKREPQCLDSHDDDEDGGDQERAAPRRGVALPAADGT  
 DQGSYGVIDGEPVSLVSHCLPDQIVPPAEEDATAGAVDEERWSPPQPASPTAALVKQNSY  
 DLMVISSLLFSDLPDRIDDDLSVSQTEGTELSEQGSSGVIDDDYWREADATGGAEREEI  
 ALLDEERCQPQPAPPTDALVPPLQGQNSYDVMADSSLLFADLPGRIDDELQRSLRVSD  
 MPDLFLSQTEEAGAGGGGGAAPVLNKQSNSSPLGVMSEVPVLSDLFPESIDEVLSYI  
 DFATDDCLDFDMDLFSMPAD\*

## Gene Structure

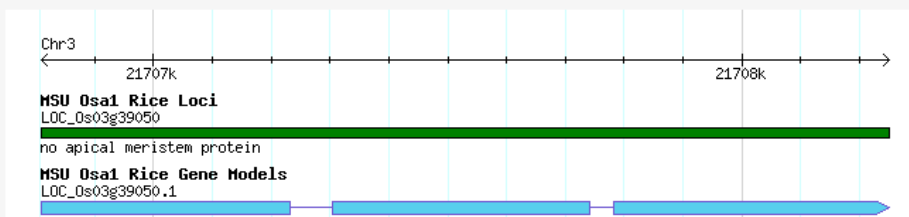

## LOC\_Os07g27330 (ONAC065) sequence information

**Genomic sequence length:** 2716 nucleotides

**CDS length:** 2331 nucleotides

**Protein length:** 776 amino acids

## Genomic Sequence

## &gt; ONAC065

```
GCTTCCGCCTCTCCTCGCCTCCTCCCTTCCTTTCCCCCCCCAAACCCTAGAATTCCCCCCC
ACAAAACCCTAGAATTTCGCGGATCGAGGCGGCTATGGCGGCGGCCGCGGATGGGCTTCC
GCCGGGCGTCAGGTTTCGACCCCGCCGACGACGAGCTCGTCTCCCGCTACCTGCTCCGGCG
CCTCCGGAAGCAGCCCATCCCGCTCCACGGCGTCATCCACGAGGCGGATCCCCCTCGGCGC
GCCGCCATGGATGCTCCTCGCCGCTCACGGCCGGGCGGCGACGAGGCCTTCTTCTTCGC
CGAGGCGCGCGCCAAGAACGTCAGGGGGAAGCGGCAGAAGCGTACCGTCGAGGGTGGGGG
GTTCTGGCAGGGGCGAGCGGGTGTGCATCGACGGCGAGAGGCTGCGCGTCCCCGGCGACGG
CGGCGGCGGCGAAGTCGGCGGGGAATTGGAGATCGAGTGGCGGAAGTACATGCTGAGCTT
CTTCGCCGAGGGGGAGAGGGGCGAGCTCGGGGTGGGTGATGCACGAGTACGCCATCACGGC
GCCCCGTGACCTCGCCTCGTCGCCGATCCGGCTTTACCGCGTCCGGTTCAGCGGCCACGG
CAAGAAGCGCAAGCGGGAGCCGGAACGCCTGGGCGCCCGCGTCCACGACGACGACGTCGA
CGGTGGAGAACGCGCCGCGCCCCGGCGCGCCGTGGCAGAGACCGCCCTGTTCTGTCAGCA
GTCGAGCGCCGTGGATTGCGCCGAATCCGCCGATCAGAGCTTCTCCGGCGTGATCGAGCC
TGTGTTCCACGATCTCCCCGACATGATGCCAGAGCAAGCTGATGCCGGAGACACTGCAGA
GACTACAGCAGCGGTGGTGAACCTCACGGACGCCATGACCGAGCAGCCCGTTCTTCCGCT
AGCAGCAGATGGCGACGATCAGAGCTCCTACGGTGTTCATCGATCCGGCGTTCCGCGATCT
TGCTGACCTGATGGTCTGCCACCTGTGCTCGCGCAGCAGGAGCCTCCGCTCGCGCCCGT
GGCAATGGTGGATCTCCCTCCTGGCAATGCTGATTGCGCCGATCATCAGAGCTGCTCTGG
CGTGATCGACCCGGCGTTCCGTGATCTCCCCGACATGACCGTGCTGCCACCAGAGCAAGC
TGACACCGGAGGCGGAGCAGAGACTACCACAGCAATGGTGAGCCTCACGGACAAGCTGAA
ATACTCCTCCTCCATGGACGGCGAGGCGAGCGCCGGCGTGGTGTGATTTTCGATTTTCCAGA
GAGCACTGATGAGGTGCTCAGCTACATGAACTTCACCGCCGGTGCCACGACAACAATGA
CGGCAGTGTGGGACGCGCCGCGCCATGGCGTCCCGTGTGAGAGATCGCCATGTTTCGAGCA
GCCGAGCGCCGTGGATCTCCCTCCTGGCGATGCTGATTGCACTGAATCCGCCGATCAGAG
CTTCTCCGGCGTGATCGAGCCGGTGTTCATGATCTCCCCGACATGATCCGTGAGCAAGC
TGATGCCGGAGACACCGCAGAGACTACTGCAGCGGTGGTGAACCAGAACTACTCCATGGC
GTTGTGTGATTTTCGACAGCGGCATTGACTTCACCGCCGGCGCCACGACAGCGGCATGGA
ACGCGCCACGCCCTGGACTCCCATGTCAGAGGCCGCCCTGTTTCGAGCAGCAAGGGCCTCC
GCTCGCTCCCGCGGCAGTGGTGGATCTCCCTCCTGGCAATGCTGATTGTGCCGATCATCA
```

GAGCTCCTACGGTGACATGATCGTCCTGCCATCAGAGCAAGCTGGCGCCGGAGGCGGAGC  
 AGAGACTACCGAGGCCCTGTTTCGACCAGCCCGTTCCGCGCTTGCAGCAGATTGCGCCAA  
 TCAGGGCTCCTACGGCGTGATCGACCCGGTGTTCGCGGATCTCGCCGACTTGATCGTTCT  
 GCCACCAGAGCAGGCCGACGCCATGGACGGCGAGGCGGCGCCGGCGTGGTGTGATTTCGA  
 TTTTCCGGAGAACATTGATGAGGCGCTCAGCTACGTCGACTTCACCGCCGGCGCCACGC  
 TGACAACGACGGTGGCGTGTCTAGAGACCGCCATGTTTCGAGCAGCCGGGGTCTCCGCCACA  
 GCACGATCCTCTGCTGATGGATGCTGATGGCGCCGATCAGAGCTCCTCCTCCGGCGCGCT  
 GATCGACACGGTGTTCGGTGATCACGCCGAACCGATCGTCCTGCCACTGGAGCAAGCTGA  
 CACCGGAGGTGGTGACAGCAGCGCGGTGAAACTCATGGACAAGCAGAAGTACTCCTCCTC  
 CTCCATGGATGGCGAGGAGGCGCCGGCGTGGTGTGATTTCGGATTTCCCGGAGAGCATTGA  
 CGAGGTGCTCAGCTATGTCGACTTCAGCACCGATGGCGCGAGCTGCGACTTCTCCATGGA  
 CGAGCTCTTCGATCTTGACAGATTAGTTAGCATCCTGGAGATAGCAAGCCACCAAGAACAC  
 TGGCATTGACATTGTCTTTCTAAGAAGAGCTGTAATCAGTAGCGCAAAGGCGAGATTTGT  
 TGATATTCTGGTGTAACTCTGTAGACTAGAGGCAGAGTAGATAGATGTTTCCTTAGTTTATT  
 GACTAATCTATGCATAGATGAGTTATTTGTTTATTGATTGAACTCAATGTAAGTAACATT  
 ATTGTAAGTAATGAATATACTCCCTTTTCAATCATTATATCCCTATTCAAATCAATAT  
 ACTGCATTGATCTGCC

CDS

> **ONAC065**

ATGGCGGCGGCCGCGGATGGGCTTCCGCGGGCGTCAGGTTTCGACCCCGCCGACGACGAG  
 CTCGTCTCCCGCTACCTGCTCCGGCGCCTCCGGAAGCAGCCCATCCCGCTCCACGGCGTC  
 ATCCACGAGGCGGATCCCTTCGGCGCGCCGCCATGGATGCTCCTCGCCGCTCACGGCCGG  
 GGCGGCGACGAGGCCTTCTTCTTCGCCGAGGCGCGCGCAAGAACGTCAGGGGGAAGCGG  
 CAGAAGCGTACCGTCGAGGGTGGGGGGTTCTGGCAGGGGCAGCGGGTGTGCATCGACGGC  
 GAGAGGCTGCGCGTCCCCGGCGACGGCGGCGGGCGGAAGTCGGCGGGGAATTGGAGATC  
 GAGTGGCGGAAGTACATGCTGAGCTTCTTCGCCGAGGGGGAGAGGGGCAGCTCGGGGTGG  
 GTGATGCACGAGTACGCCATCACGGCGCCCGTGACCTCGCCTCGTCGCCGATCCGGCTT  
 TACCGCGTCCGGTTCAGCGGCCACGGCAAGAAGCGCAAGCGGGAGCCGGAACGCCTGGGC  
 GCCCCGCTCCACGACGACGACGTCGACGGTGGAGAACGCGCCGCGCCCCGGCGCGCCGTG  
 GCAGAGACCGCCCTGTTTCGTGCAGCAGTCGAGCGCCGTGGATTGCGCCGAATCCGCCGAT  
 CAGAGCTTCTCCGGCGTGATCGAGCCTGTGTTCCACGATCTCCCCGACATGATGCCAGAG  
 CAAGCTGATGCCGAGACACTGCAGAGACTACAGCAGCGGTGGTGAACCTCACGGACGCC  
 ATGACCGAGCAGCCCGTTCTTCCGCTAGCAGCAGATGGCGACGATCAGAGCTCCTACGGT  
 GTCATCGATCCGGCGTTCCGCGATCTTGCTGACCTGATGGTCCTGCCACCTGTGCTCGCG  
 CAGCAGGAGCCTCCGCTCGCGCCCGTGGCAATGGTGGATCTCCCTCCTGGCAATGCTGAT  
 TCGCGCCGATCATCAGAGCTGCTCTGGCGTGATCGACCCGGCGTTCCGTGATCTCCCCGAC  
 ATGACCGTGCTGCCACCAGAGCAAGCTGACACCGGAGGCGGAGCAGAGACTACCACAGCA  
 ATGGTGAGCCTCACGGACAAGCTGAAATACTCCTCCTCCATGGACGGCGAGGCAGCGCCG  
 GCGTGGTGTGATTTTCGATTTTCCAGAGAGCACTGATGAGGTGCTCAGCTACATGAACTTC  
 ACCGCCGGTGCCACGACAACAATGACGGCAGTGTGGGACGCGCCGCGCCATGGCGTCCC  
 GTGTCAGAGATCGCCATGTTTCGAGCAGCCGAGCGCCGTGGATCTCCCTCCTGGCGATGCT  
 GATTGCACTGAATCCGCCGATCAGAGCTTCTCCGGCGTGATCGAGCCGGTGTTCATGAT  
 CTCCCCGACATGATCCGTGAGCAAGCTGATGCCGGAGACACCGCAGAGACTACTGCAGCG  
 GTGGTGAACCAGAACTACTCCATGGCGTTGTGTGATTTTCGACAGCGGCATTGACTTCACC

GCCGGCGCCACGACAGCGGCATGGAACGCGCCACGCCCTGGACTCCCATGTCAGAGGCC  
 GCCCTGTTTCGAGCAGCAAGGGCCCTCCGCTCGCTCCCGCGGCAGTGGTGGATCTCCCTCCT  
 GGCAATGCTGATTGTGCCGATCATCAGAGCTCCTACGGTGACATGATCGTCCTGCCATCA  
 GAGCAAGCTGGCGCCGGAGGCGGAGCAGAGACTACCGAGGCCCTGTTTCGACCAGCCCGTT  
 CCGCCGCTTGACAGCAGATTGCGCCAATCAGGGCTCCTACGGCGTGATCGACCCGGTGTTC  
 CGCGATCTCGCCGACTTGATCGTTCTGCCACCAGAGCAGGCCGACGCCATGGACGGCGAG  
 GCGGCGCCGGCGTGGTGTGATTTTCGATTTTCCGGAGAACATTGATGAGGCGCTCAGCTAC  
 GTCGACTTCACCGCCGGCGCCACGCTGACAACGACGGTGGCGTGTGAGAGACCGCCATG  
 TTCGAGCAGCCGGGGTCTCCGCCACAGCACGATCCTCTGCTGATGGATGCTGATGGCGCC  
 GATCAGAGCTCCTCCTCCGGCGCGCTGATCGACACGGTGTTCGGTGATCACGCCGAACCG  
 ATCGTCCTGCCACTGGAGCAAGCTGACACCGGAGGTGGTGCAGCAGCGCGGTGAACTC  
 ATGGACAAGCAGAAGTACTCCTCCTCCTCCATGGATGGCGAGGAGGCGCCGGCGTGGTGT  
 GATTCGGATTTCCCGGAGAGCATTGACGAGGTGCTCAGCTATGTCGACTTCAGCACCGAT  
 GGCGCGAGCTGCGACTTCTCCATGGACGAGCTCTTCGATCTTGACAGATTAG

Protein

#### > ONAC065

MAAAADGLPPGVRFDPADDELVSRYLLRRLRKQPIPLHGV IHEADPLGAPPWMLLAHGR  
 GGDEAFFFAEARAKNVRGKRQKRTVEGGGFVQGGQVRCIDGERLRVPGDGGGGEVGGELEI  
 EWRKYMLSFFAEGERGSSGWVMHEYAITAPADLASSPIRLYRVRFSGHGKKRKREPERLG  
 ARVHDDVDGGERAAPRRVAETALFVQQSSAVDCAESADQSFSGVIEPVFHDLPDMMPE  
 QADAGDTAETTAAVVNLTDAMTEQPVLPLAADGDDQSSYGVIDPAFRDLADLMVLPVLA  
 QQEPPLAPVAMVDLPPGNADCADHQSCSGVIDPAFRDLPDMTVLPPEQADTGGGAETTTA  
 MVSLTDKLKYSSSSMDGEAAPAWCDFDFPESTDEVLSYMNFTAGAHNDGSGVRAAPWRP  
 VSEIAMFEQPSAVDLPPGDADCTESADQSFSGVIEPVFHDLPDMIREQADAGDTAETTA  
 VVNQNYSMALCDFDSGIDFTAGAHDSGMERATPWTMSEALFEQQGPPLAPAAVVDLPP  
 GNADCADHQSSYGDMIVLPSEQAGAGGGAETTEALFDQVPVPLAADCANQSGYGVIDPVF  
 RDLADLIVLPPEQADAMDGEAAPAWCDFDFPENIDEALSYVDFTAGAHADNDGGVSETAM  
 FEQPGSPQHDPLMDADGADQSSSSGALIDTVFGDHAEPVLPLEQADTGGGAAAANKL  
 MDKQKYSSSSMDGEEAPAWCSDFPESIDEVLSYVDFTDASCFDSMDELFDLAD\*

#### Gene Structure

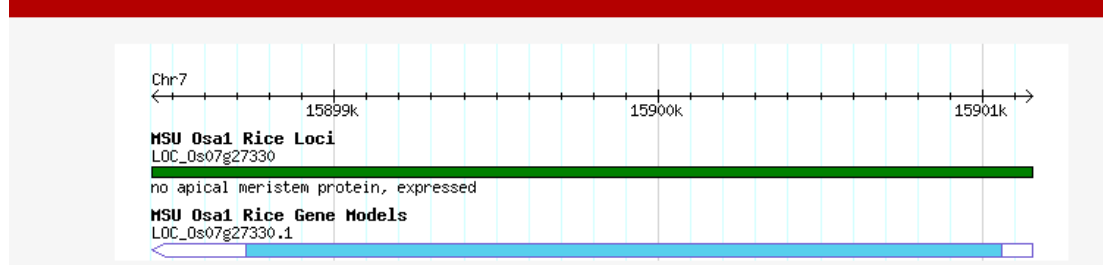

#### LOC\_Os03g56580 (ONAC066) sequence information

**Genomic sequence length:** 2292 nucleotides

**CDS length:** 1089 nucleotides

**Protein length:** 362 amino acids

## Genomic Sequence

## &gt;ONAC066

GAAAGGCCAATATCTCAAGAGAGCTAGCTAGAGCTCCATTTACAACCATTACAAGATTGC  
 ATCAGAGAAGATATCTTCATAGATAATTGTTGGAGCAAGAACAAGAAAACACGTAGGT  
 TCAATTATAATCGATCGTGGAGATGGTGACCAGCAAGGAGTTTGCAAGGGATCAGGCGGC  
 CATGGATCAGAAGATCAAGAGCGACGTCGGCGAGGTGGTGCTCGCCGGAGACGAGGAAGA  
 AGACGGGGACGTGGTGCTCCCGGGGTTAGGTTCCACCCGACCGACGAGGAGCTCGTCAC  
 GTTCTACCTCCGGCGGAAGGTGGCGAGGAAGTCTCTCAGTATAGAGATCATCAAGGAGAT  
 GGACATCTACAAGCACGATCCATGGGATCTCCCCAGTAAGTGCATCCCCAATTAATTTGA  
 CAAATAACCTCAAACACAAATCATTTTCAAAATAATTGAGCTAAATTCTGTGTTTGTGTT  
 TGAATGAATGGAATGATTTTGTGCAGATGCGAGCACGGTAGGTGGAGAGAAGGAGTGGTA  
 CTTCTTCTGCCTGAGAGGGAGGAAGTACAGGAACAGCATCAGGCCCAACAGGGTGACGGG  
 ATCCGGGTTCTGGAAGGCGACGGGGATCGACCGGCCGATCTACTCCGCCGCCGTCAACAG  
 CAACTCCGGCGAGTCGATCGGGCTGAAGAAGTCGCTCGTCTACTACCGCGGCAGCGCCGG  
 CAAGGGCACCAAGACCGACTGGATGATGCACGAGTTCCGCCTCCCGCCGGCGATCGCCGC  
 CGCCGACGCCTCCCCGTGCATGCAAGAAGCTGTAAGCACGCACTCCCATGCTCTCATGCT  
 CGTTCGTTCTCCTTCTCCATCGTCGTCAAGGCCTCGTGTACTCGATCCCATGTACGTAAG  
 AAGTGCATTTCGTAATGGGAGAATTACCCAACTCAGCCTGGAGAGAGATGGAGAATTACC  
 CAGACTCAACCTGGACGAGAGAGATGGGTGCACTAGAGGGATACGAGCAACCAAACACA  
 CCATATCCATATCCGGTTCTCCTCATCTGTGACAGATCACAACCTACGTACAATTTGATAG  
 TGTGGAGTACAATATCATCTGCAATACTTTACATCACCAAATCGTCTTAATATTTTTTTT  
 CAAGCTAAGTTCAGCAGTTCTTTTCGAGATTACAGGCCTCCTTTTGAACGAAGAAATTTTG  
 CGAAAAATTCTACAAAAATTGAACTAATCCATGTGAAAGTCCTACTGAAATTCCCACGTTT  
 TAAAGGAGTACTGGACATCCTCTCACGTTCTGACGTGTTTCTAGTATTCTACCGATTGCC  
 ATTTCTAACCGATAAGAGTACAGCCTCCTAATAGCATTGACCTCTAACTTGTGCACTTCT  
 GACTGAAAAAAATGCAGGAGGTCTGGACCATCTGCAGAATCTTCAAGAGAAGCATCACCT  
 ACAGGAAGCAGCAGCAGCAGCAGGCCTGGAGGCCGCCGGCGACGGTGACCGTCAAGGCCC  
 CACCGCCGGGGGACTCGAGCTCCAACACCGGCAGCTTCGAGTCGGACGGCGGGCGGACG  
 AGTTCATGAACTGCGGCCTGACTCCGGCCATCTCCCAGCAGCAGCAGCACGGCGGCCGTC  
 ATCAGATGATGAGCACGATGAGCTGCAACGGCGGCTACTTCTTCAACGACGGCATCCATC  
 ACAGCCACAGCCACCACAAGCTTCATAGTCAATGGGGTCCCTACAAATGGCGCCGCCGG  
 AGCCGAAGCCGGAGCCGGAGCAGAAGCCTCTGAGCTCGCCGGCGATGACGATCGCCTTCC  
 ATCAAAACGACCATGGCTTCCCCGCCGCCGCCGCGGATTTCTACAAGGATGGGTACTTGG  
 AAGAGATTGCGAGGATGATGGAGGTGGCTGATCCAAGTCCAACAGGATTCTATGACTGTA  
 GATATTGATCAGTAGGAACAGGGTTTCAGAATAGATGCTAGATATGCAGAATTCGCCGAC  
 AAGAACAGTGCCCCCTTTGTGTGAGAGGCTGACATGTAGGGCCCATGCTGCAGAGGCTGC  
 TATCACTATTAGTCTTGTACTTTTGTCTTCTGATCTAATATATACTCCAGATGGGATG  
 TGAAGTGTATACAAGATACCTGATTGTTACTTGTGTACTTGTGTCTGTGATGAACTGCT  
 GGCTATATGCATACTACACCTGTTTCAAAATATAAGTGATATTGGCTATACAATTCATAG  
 ATAATATCTCTTAGATTTTGAGATGGAGGTAATATCTCTTAGTACTTAATGAATCATTTT  
 TTGGGGTGATCA

## CDS

## &gt; ONAC066

ATGGTGACCAGCAAGGAGTTTGCAAGGGATCAGGCGGCCATGGATCAGAAGATCAAGAGC  
 GACGTCGGCGAGGTGGTGCTCGCCGAGACGAGGAAGAAGACGGGGACGTGGTGCTCCCG  
 GGGTTCAGGTTCCACCCGACCGACGAGGAGCTCGTCACGTTCTACCTCCGGCGGAAGGTG  
 GCGAGGAAGTCTCTCAGTATAGAGATCATCAAGGAGATGGACATCTACAAGCACGATCCA  
 TGGGATCTCCCCAATGCGAGCACGGTAGGTGGAGAGAAGGAGTGGTACTTCTTCTGCCTG  
 AGAGGGAGGAAGTACAGGAACAGCATCAGGCCAACAGGGTGACGGGATCCGGGTCTTG  
 AAGGCGACGGGGATCGACCGGCCGATCTACTCCGCCGCCGTCAACAGCAACTCCGGCGAG  
 TCGATCGGGCTGAAGAAGTCGCTCGTCTACTACCGCGCAGCGCCGGCAAGGGCACCAAG  
 ACCGACTGGATGATGCACGAGTTCGCGCTCCCGCCGGCGATCGCCGCCGCCGACGCCTCC  
 CCGTGCATGCAAGAAGCTGAGGTCTGGACCATCTGCAGAATCTTCAAGAGAAGCATCACC  
 TACAGGAAGCAGCAGCAGCAGCAGGCCTGGAGGCCGCCGGCGACGGTGACCGTCAAGGCC  
 CCACCGCCGGGGACTCGAGCTCCAACACCGGCAGCTTCGAGTCGGACGGCGGCGGCGAC  
 GAGTTCATGAACTGCGGCCTGACTCCGGCCATCTCCCAGCAGCAGCAGCACGGCGGCCGT  
 CATCAGATGATGAGCACGATGAGCTGCAACGGCGGCTACTTCTTCAACGACGGCATCCAT  
 CACAGCCACAGCCACCACAAGCTTCATAGTCAATGGGGCTCCCTACAAATGGCGCCGCCG  
 GAGCCGAAGCCGGAGCCGGAGCAGAAGCCTCTGAGCTCGCCGGCGATGACGATCGCCTTC  
 CATCAAAACGACCATGGCTTCCCCGCCGCCGCCGCGGATTTCTACAAGGATGGGTACTTG  
 GAAGAGATTGCGAGGATGATGGAGGTGGCTGATCCAAGTCCAACAGGATTCTATGACTGT  
 AGATATTGA

Protein

#### > **ONAC066**

MVTSKEFARDQAAMDQKIKSDVGEVVLAGEEEDGDVVLPGFRFHPTDEELVTFYLRRKV  
 ARKSLSIEI IKEMDIYKHDPWDLPNASTVGGEKEWYFFCLRGRKYRNSIRPNRVTGSGFW  
 KATGIDRPIYSAAVNSNSGESIGLKKSLVYYRGSAGKGTCTDWMHEFRLPPAIAAADAS  
 PCMQEAEVWTICRIFKRSITYRKQQQQQAWRPPATVTVKAPPPGDSSSNTGSFESDGGGD  
 EFMNCGLTPAISQQQQHGGRRHQMSTMSCNGGYFFNDG IHHSHSHHKLHSQWGS LQMAPP  
 EPKPEPEQKPLSSPAMTIAFHQNDHGFPAAADFYKDGYLEE IARMMEVADPSPTGFYDC  
 RY\*

#### Gene Structure

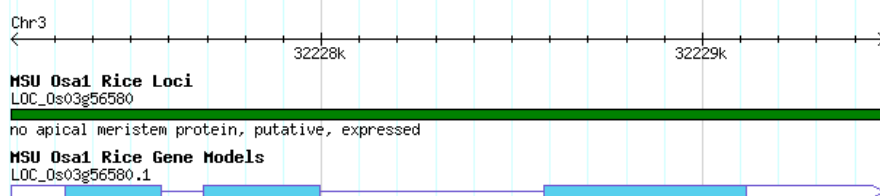

#### **LOC\_Os03g39100 (ONAC069) sequence information**

**Genomic sequence length:** 1503 nucleotides

**CDS length:** 1503 nucleotides

**Protein length:** 500 amino acids

## Genomic Sequence

> **ONAC069**

ATGGCGGGCGCGGATGGGCTCCTTCCCGGCCTCAGGTTTCGACCCTAGCGACGACGAGCTC  
 GTCTCCCGCTACCTTCTCCGGCGCATCCAGCAGAAGCCCCCTCCCGCTCGACGGCGTCATC  
 GTGGATGCCGATCCCCTGAGCGTGCCGCCATGGACGCTTCTCGCGGATCACACCCGAGGC  
 GACGAGGCCTTCTTCTTCGCGGAGGCACGCGCCAAGAATGGCAAGGGCAAGCGACAGAAG  
 CGAACCGTGAGGGCGGAGGGTTCTGGCAGGGGCAGAGGATGGCCGTGGATGGCGAGCGG  
 CTGGTCGTCCCAGGCGACGATGGAGGCGGCGGCGGCGACGAAGGCCTGGAGATCACGTGG  
 CGCAAGTATGTGTTGAGCTTCTTCGCCGAGGGTGAACGGGGCAGCTCGGGCTGGGTTATG  
 CACGAGTACGCCGTGACGTGCCGGCTGACCTCGCCTCGTCGCAGCTCCGGCTGTACCGC  
 GTCAGGTTTCAGCGGCCACGGCAAGAAGCGCAAGAGGGAGCCGCAGTGTCTGGACTCCAC  
 GACGACGACGACGGCGGGGATCAAGAAAAGCGCGACTCACCGGCGCGCCGTGGCTGAGACC  
 ACTCTGTTTCGACGGATACGTGCCTCGTCCTGCAGCCGACGGCACCGACCAGGGCACCTAT  
 GCGTGATCGACGGCGAATCTTCGCTGGCGTCACATTGTCTTCCCGATCAGATCGTTCCC  
 CCAGCAGAAGAAGCTGATGCCACTGCTGGTGTAGAGAATCCTCTGCTCGATGAGGAGCGC  
 TGGTCACCACCACAGCCCGCTCTGGTGAAGCAGAACTCCTACGACCTAATGGCCATTTTCG  
 TCACTGCTGTTTTCTGATCTTCCCGACAGAATCGATGACGATGACCTGTCTGTGTCGAA  
 ACAGAGGGCACCGAGCTGTCCGAGCAGGGCTCCTCCGGCGTGATCGACGACGATTATTGG  
 CGGGTGTTCCATGGACTTTCGACCTGATCGCGCTGCCAGCAGAGGAAGCCGATGCCACC  
 GGTGGTGCAGAGAGAGAAGAGATCGCTCTGCTCGACGAGGAGCGCTGCCCCGAACCACAG  
 CCCGCTCCTCTACTGCAGCTCTAGTGCCACCACTGCAGGGCCAGAGCTCCTACGACTTG  
 ATGGCTGATTCGTCACTGTTATTTGCTGATCTTCCTGGGAGCATCGATGACGATGAGCTG  
 CAGCGATCTCTGCGTGCGTCGGACATGCCTGACCAGTTCTTGGCGCAGACAGAGGAAGCC  
 GGTGCCGGTGGTGGTGGTGGCGCAGCGCGAGCGCTGAACAAGCAGAGCAACTCCTCACCG  
 TTGGGCGTCGAGGTGCCGATGGCGTTGTCTGATCTTGAGTCCCCAGAGAGCATGCCTTTCG  
 TCTGATCTAGAGTTCCCAGAGAGCATCGATGAAGTGCTTAGTTACATTGACTTCACCACG  
 GATGATACGAGCTGCCTCGATTTCGACATGGACGAGCTGTTTTCCGACATGCCAGCAGAC  
 TAG

## CDS

> **ONAC069**

ATGGCGGGCGCGGATGGGCTCCTTCCCGGCCTCAGGTTTCGACCCTAGCGACGACGAGCTC  
 GTCTCCCGCTACCTTCTCCGGCGCATCCAGCAGAAGCCCCCTCCCGCTCGACGGCGTCATC  
 GTGGATGCCGATCCCCTGAGCGTGCCGCCATGGACGCTTCTCGCGGATCACACCCGAGGC  
 GACGAGGCCTTCTTCTTCGCGGAGGCACGCGCCAAGAATGGCAAGGGCAAGCGACAGAAG  
 CGAACCGTGAGGGCGGAGGGTTCTGGCAGGGGCAGAGGATGGCCGTGGATGGCGAGCGG  
 CTGGTCGTCCCAGGCGACGATGGAGGCGGCGGCGGCGACGAAGGCCTGGAGATCACGTGG  
 CGCAAGTATGTGTTGAGCTTCTTCGCCGAGGGTGAACGGGGCAGCTCGGGCTGGGTTATG  
 CACGAGTACGCCGTGACGTGCCGGCTGACCTCGCCTCGTCGCAGCTCCGGCTGTACCGC  
 GTCAGGTTTCAGCGGCCACGGCAAGAAGCGCAAGAGGGAGCCGCAGTGTCTGGACTCCAC  
 GACGACGACGACGGCGGGGATCAAGAAAAGCGCGACTCACCGGCGCGCCGTGGCTGAGACC  
 ACTCTGTTTCGACGGATACGTGCCTCGTCCTGCAGCCGACGGCACCGACCAGGGCACCTAT  
 GCGTGATCGACGGCGAATCTTCGCTGGCGTCACATTGTCTTCCCGATCAGATCGTTCCC  
 CCAGCAGAAGAAGCTGATGCCACTGCTGGTGTAGAGAATCCTCTGCTCGATGAGGAGCGC

TGGTCACCACCACAGCCCGCTCTGGTGAAGCAGAACTCCTACGACCTAATGGCCATTTCG  
 TCACTGCTGTTTTCTGATCTTCCCGACAGAATCGATGACGATGACCTGTCTGTGTCGCAA  
 ACAGAGGGCACCAGCTGTCCGAGCAGGGCTCCTCCGGCGTGATCGACGACGATTATTGG  
 CGGGTGTTCATGGACTTTCCGACCTGATCGCGCTGCCAGCAGAGGAAGCCGATGCCACC  
 GGTGGTGCAGAGAGAGAAGAGATCGCTCTGCTCGACGAGGAGCGCTGCCCCGAACCACAG  
 CCGCTCCTCCTACTGCAGCTCTAGTGCCACCACTGCAGGGCCAGAGCTCCTACGACTTG  
 ATGGCTGATTCGTCACTGTTATTTGCTGATCTTCCTGGGAGCATCGATGACGATGAGCTG  
 CAGCGATCTCTGCGTGCCTGACCATGCTGACCAGTTCTTGGCGCAGACAGAGGAAGCC  
 GGTGCCGTTGGTGGTGGCGCAGCGGACGCTGAACAAGCAGAGCAACTCCTCACC  
 TTGGGCGTCGAGGTGCCGATGGCGTTGTCTGATCTTGAGTCCCCAGAGAGCATGCCTTTG  
 TCTGATCTAGAGTCCCAGAGAGCATCGATGAAGTGCTTAGTTACATTGACTTCACCACG  
 GATGATACGAGCTGCCTCGATTTCGACATGGACGAGCTGTTTTCCGACATGCCAGCAGAC  
 TAG

#### Protein

##### > ONAC069

MAGADGLLPGLRFDPSDELVSRYLLRRIQQKPLPLDGVIVDADPLSVPPWTLLADHTRG  
 DEAFFFAEARAENGKGRQKRTVEGGFWQGRMAVDGERLVPGDDGGGGGDEGLEITW  
 RKYVLSFFAEGERGSSGWMHEYAVTSPADLASSQLRLYRVRFSGHGKRRKREPQCLDSH  
 DDDDGGDQESATHRRVAETTLFDGYVPRPADGTDQGTYGVIDGESSLASHCLPDQIVP  
 PAEEADATAGVENPLLDEERWSPPQALVKQNSYDLMAISSLLFSDLPDRIDDDLSVSQ  
 TEGTELSEQSSGVIDDDYWRVFHGLSDLIALPAEEADATGAEREEIALLEERCQPQ  
 PAPPTAALVPPLQGQSSYDLMDSSLLFADLPGSIDDDELQRSLRASDMPDQFLAQTEEA  
 GAGGGGGAAAAALNKQSNSSPLGVEVPMALSDLESPESMPLSDLEFPESIDEVLSYIDFTT  
 DDTSCLDLDFMDELFSMPAD\*

#### Gene Structure

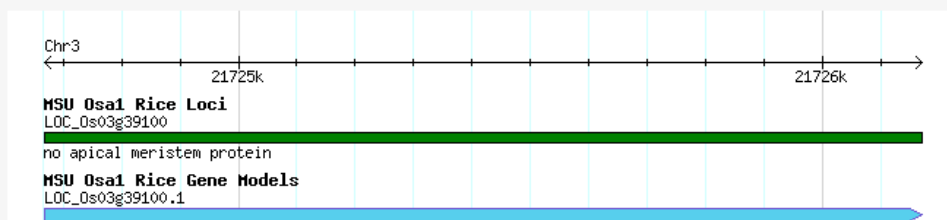

#### LOC\_Os02g57650 (ONAC070) sequence information

**Genomic sequence length:** 4088 nucleotides

**CDS length:** 1899 nucleotides

**Protein length:** 632 amino acids

#### Genomic Sequence

##### > ONAC070

CTATTATTATTTTCTTTCTCATCACGCGGCTGCGTCCGTATCGCGACTTTTATCCTCTCC  
 TCCCCAACTAACTCGGCGTTCGCCATCTCGTGTGCGACTTCCTCCTCAAAACCCTAATTCC



ATCCACCGCTCGATCCAATCTACCCTCTCTCTCGATTCTCAATTCTCAATTCTCCCTGCA  
AAATTCCCAATCCTCCGTGCAGAAATTAGAATTATGCGGGATTGATCCCCTCCCACGGGAT  
CTCCAATATCATATCCATCCAGAAATTGAAATTCCCCTCGCCGCCGATGAGCCAATCGCC  
GCCGGA CTCTCTCCGCGGCGGGTGGCCCTGGCGCCGGGGTTTCGCTTCCACCCAC  
CGACGAGGAGCTCGTCTCCTACTACCTCCGCCGCCGCATCCTCGGCCGCCGCTCCGGAT  
CGACGCCATCGCCGAGGTCGACCTCTACCGCCTCGAGCCGTGGGACCTCCCCTCCCTCTC  
CCGCATCCGGAGCCGCGACGCGCAGTGGTACTTCTCGCCCGCCTCGACCGCAAGGTCAC  
CGGCGCCGGGGCCGGCGGCCGCGGCCCCGGGAACAGGACCAACCGCGCCACGCCGCG  
CGGCTACTGGAAGACCACCGGGAAGACCGCGATGTCCACCACCGCGCAAGCTCGTCGG  
GATGAAGAAGACGCTCGTCTTCCACTCCGGTAGGGCGCCCAAGGGCCAGAGGACCAACTG  
GGTCATGCACGAGTACCGCCTCCTCGACGCCGACGGCACCCAGGTACCTGTGAAATCATT  
TGATCCATCTCAAAATTCGCGAGGATCTACCGTACCACGAGATCACGAGATTAGCGGTAGC  
ACCAAAAAAATTCTGTTCTTTTAGCTTGTCTCCTGCTAGGCTTGTGTGAGCGGTAGGTGG  
GAACTGGTCTTATTCTACTTTCAACACTCGTTACTTGCTGCTGCTTAGATATGTTATCTA  
GTGCGACCCTGTCCCGGGCCTAGAATGGTTACAACATTCTCATGTTTGTTCACTTGATAC  
CTATATATGGTAGGTAAAAACCTTTCCTTACAACATCAATGACTTGCTTTGAGAAAAACC  
AATATGAGCATGAGCTTATCTTTTGTCAATAAAAAGAAGAAAAAAGTGCAGATGCACTGG  
TAGAAGTGATAGAGCACGTCTGAAAAATGTATGAAGCAAGGGGGCTTTTAACTGGGCTATT  
TAAGCATTGGAATCTTATCCTCACTCTGAATTGAGGAGTCTGAATTGCGGAGGACCAAT  
GGTTTTTAACCTGTATAGAATATTGATGTAGCATCCTTTTCTGATAGCTGATGTTAGTTT  
CCTGTTGAGTGCGCAGGATCTGCATGTGGTGTGTAGAATCTTCCAGAAAAATGGATCTGG  
GCCACAAAATGGTGACAGTACGGTGCGCCATACTTGGAGGAAGATTGGGAAGAGGAGGA  
TGATGCAATTGAGAACATGCCTGCCAGTGGCGCTTTCGCTGAAATGGCTGCAGTCACAGA  
TACTGCAGATGAGTCGACTGAGGAAGATGGGAATTTCTCCCTTAAACTAATGATGAGCC  
TTTACAAGTAAGTACTCCCTCCATCCCATATAAAGGGATTTTGAGTTTTTGCTTGCAA  
CGTTTGACCACTCATCTTATTCAAAATTTTTGAAATTATTAATTATTTTATTTGTGACT  
TACTTTATTATCTACAGTACTTTAAGCACAACTTTTCGTTTTTTATATTTGCAAAAAAAT  
TTGAATAAGACGAGTGGTCAAAACGTTGCAAGCAAAACTGAAAATCCCTTATATTGTGGG  
ACGGAGGGAGTAGTGCCCATTTTCTTTTGTATTTTCCAAGATGTTAGTTATTA AAACTG  
AAATTGTACTGTCAATACTCAACACCTATAATGAAAAGTCAAGGTTCAAATGAGGAGACCAAT  
GAATTACCTTTAACTGAAAACATTCTATGTGACTATATCAATGAATACAGGATAATGATA  
GCTGAAAACAACTAAGTAGACTATGCATTTGCCATCATGGTTGAAGAGTTCTTTTCTTTAA  
TTAAGGTTTTGCATGTTTCTATTCCCTGTTACTGTTCTGACAAAATTTTAAAATAGAATA  
ATTCTTGCTGGATTTTATCTCTTCATATTTTTTTCCTCGATAATATATTTATTGCTCCTC  
CTATCAAGTGCTCTGTGATGTGTAACACACCTTCATGTACTTCAATTACCACTACAGACC  
CAAGAATACCAGCCAGAGATAACTCCTGTGAAAGCTCAAGGTTCAAATGAGGAGACCAAT  
GGCGGTGGTTACAGTTGTGATGTTTTTCTCTGGATGAGATTTTGCAGGAACCTGAAAAT  
GTCTGCAAAAATGAAGAGCAGAATGCCATTGATGACAAGTTCATATCGCAGAGTTATCT  
GGATACCAAGGCAAGATGATGGCTATGTAGGCGAGAATGGTCCTGTGAATTGGATTGAC  
CCTTCAAATGGTGATAATACAACTGGCCTTTGAGAGCATATAGTACTCAGAACCATGTC  
AATGGAACACTTAGCGCTGATGGTTTCTTTGACACGGTGAATGGTACCAACTCATATTCA  
GGTCCTTCAGATAACCAGAACCTGTATTTGCAAGATGATGGCTTGACTTCTTCTCATCAA  
GTGGGCGATAACATGCCATTTTATGACGCATCATCTAATCACAAATGGGTAGATGGAAAG  
GATGATTATTTGAATTTGAATGACCTCCTCTACCCGCCAGCAGAAAATCAACCCCTGTTT  
GATGCTGGGGATGACCTGATGGCTTACTTCGATGCCACGGAGGATGATTTCAAATTTGAT

ATTATGGGCACAGAAGATTCTAATTCTCAACTTCCAGACATGTCGAACTTTGTCCAAAAG  
 GTATGCTTCGGTGCACGCATGTCACATAACTATGCTACAGTTCTCTTACATCTAGTTAGA  
 AGGACACTTCCTGATCACTATCCTTCTTTGACTTCTTTCTGGTTATCAACTGTTGTATTA  
 TTTTCTCTGCAGGATGATAACAACAATAAGTTTACATTAGATGGGATCTCTAATACCGCT  
 TTGTATGGTGCTTCTTCATCTGGATCCCATGGCAATATGTATCCAGACACTGCAGTACCA  
 GGTATGGCTTTATCACTATATGCTTATTAGTAACTATTTTCATCTACTAAAGTTTGCCCA  
 TTGCTTTGGGGGTACATACAAGCATCTTTTATGAAATGTGACCATACTTGCATCTAAGTC  
 TCTCTTCTTTAAAAATCTCATGGAATACTTTGGTCCAGATATGCCGATGGATGACACTG  
 TTGACAAAAGTTTCGAAAGCGCCTTGCCAGCATGCTGGGTTCAATTCCAGCTCCACCCG  
 CAATGGCTTCAGAGTTCCCGCCGAGCACAGGAAAATCTGTTGTCCCACTTAGTGCTGTCA  
 ACCCGAGTAGCTCTATCCGTGTCACTGCAGGCATTATCCAACTCGGTGGTATCACTTTTA  
 CTGGTAGCACCGAGCACCTGCAGAAGAATGGAGATTTCAATTTGCTCCTCTCTTTCACTG  
 TCGAGGGCGACGTCTCAACCAAATCCATTGGTTTTGAACCGGATACGCAGATGAGCACCA  
 CGCCAATGGTGTGCGCAGCGGCATGTATCTTTCTTCGTATCGGCGATGATTCTCATGT  
 TGAGCTACAAAGTTGGGCTGTGTATCTACAGCAGGTAAGTTATAGTAGTTTTTGTGCCC  
 CAGGCTGTTTATTAAATGAAGGAGTCATACAGAGTCCACTCGACGTAGAGGGAAC TGCC  
 TCGGATTTGGACAGTTTGGTTCTTTACATTGTTATAGTTGGTATACCGTTCTGACAGTTG  
 AAAGATACATAGCAATAAACTCTGGAATTGGAGAACTAGAGTTACACGAATTTGGTGCT  
 GAAACTTTTGTGTTGGTGGCATGTACTGTATAATTTACTCTATTTATTTATTTACCCAAAT  
 CTGGGAGGCTGTAAGCGTTCCCGGATCGATGTAAGCTGATCTGAAACCTGAATACGCGCT  
 CTTCATTTTTCATACCCAAAGGGCCGAGAGGCACAGTTTGCAGTTACTGTTGATCAATTT  
 TCGGATGG

CDS

> **ONAC070**

ATGAGCCAATCGCCGCCGACTCCTCCTCCGCGGCGGCGGTGCCCCCTGGCGCCGGGGTTT  
 CGCTTCCACCCACCGACGAGGAGCTCGTCTCCTACTACCTCCGCCGCCGATCCTCGGC  
 CGCCGCCTCCGGATCGACGCCATCGCCGAGGTCGACCTCTACCGCCTCGAGCCGTGGGAC  
 CTCCCCCTCCCTCTCCCGCATCCGGAGCCGCGACGCGCAGTGGTACTTCTTCGCCCGCCTC  
 GACCGCAAGGTCACCGGCGCCGGGGCCGGCGCGCGGCCCGGGAACAGGACCAAC  
 CGCGCCACGCCGCGCGGCTACTGGAAGACCACCGGAAGGACCGCGATGTCCACCACCGC  
 GGCAAGCTCGTCGGGATGAAGAAGACGCTCGTCTTCCACTCCGGTAGGGCGCCCAAGGGC  
 CAGAGGACCAACTGGGTCATGCACGAGTACCGCTCCTCGACGCCGACGGCACCCAGGAT  
 CTGCATGTGGTGTGTAGAATCTTCCAGAAAAATGGATCTGGGCCACAAAATGGTGCACAG  
 TACGGTGCGCCATACTTGGAGGAAGATTGGGAAGAGGAGGATGATGCAATTGAGAACATG  
 CCTGCCAGTGGCGCTTTCGCTGAAATGGCTGCAGTCACAGATACTGCAGATGAGTCGACT  
 GAGGAAGATGGGAATTTCTCCCTTAAAACTAATGATGAGCCTTTACAAACCCAAGAATAC  
 CAGCCAGAGATAACTCCTGTGAAAGCTCAAGGTTCAAATGAGGAGACCAATGGCGGTGGT  
 TACAGTTGTGATGTTTTTCTCTGGATGAGATTTTGCAGGAACCTGAAAATGTCTGAAA  
 AATGAAGAGCAGAATGCCATTGATGACAAGTTCACTATCGCAGAGTTATCTGGATACCCA  
 AGGCAAGATGATGGCTATGTAGGCGAGAATGGTCCTGTGAATTGGATTGACCCTTCAAAT  
 GGTGATAATACAACTGGCCTTTGAGAGCATATAGTACTCAGAACCATGTCAATGGAACA  
 CTTAGCGTGATGGTTTCTTTGACACGGTGAATGGTACCAACTCATATTCAGGTCCTTCA  
 GATAACCAGAACCTGTATTTGCAAGATGATGGCTTGACTTCTTCTCATCAAGTGGGCGAT  
 AACATGCCATTTTATGACGCATCATCTAATCACAAATGGGTAGATGGAAAGGATGATTAT

TTGAATTTGAATGACCTCCTCTACCCGCCAGCAGAAAAATCAACCCCTGTTTGATGCTGGG  
GATGACCTGATGGCTTACTTCGATGCCACGGAGGATGATTTCAAATTTGATATTATGGGC  
ACAGAAGATTCTAATTCTCAACTTCCAGACATGTCGAACTTTGTCCAAAAGGATGATAAC  
ACAATAAGTTTACATTAGATGGGATCTCTAATACCGCTTTGTATGGTGCTTCTTCATCT  
GGATCCCATGGCAATATGTATCCAGACACTGCAGTACCAGATATGCCGATGGATGACACT  
GTTGACAAAAGTTTCGAAAAGCGCCTTGCCAGCATGCTGGGTTCAATTCCAGCTCCACCC  
GCAATGGCTTCAGAGTTCCCGCCGAGCACAGGAAAAATCTGTTGTCCCACTTAGTGCTGTC  
AACCCGAGTAGCTCTATCCGTGTCACTGCAGGCATTATCCAACCTCGGTGGTATCACTTTT  
ACTGGTAGCACCCGAGCACCTGCAGAAAGATGGAGATTTCAATTTGCTCCTCTCTTTCACT  
GTCGAGGGCGACGTCTCAACCAAAATCCATTGGTTTTGAACCGGATACGCAGATGAGCACC  
ACGCCAATGGTGTGCGCAGCGCATGTATCTTTTCTTCGTATCGGCGATGATTCTCATG  
TTGAGCTACAAAGTTGGGCTGTGTATCTACAGCAGGTA

Protein

> **ONAC070**

MSQSPDSSSAAVPLAPGFRFHPTDEELVSYLRRRILGRRLRIDAI AEVDLYRLEPWD  
LPSLSRIRSRDAQWYFFARLDRKVTGAGAGGRGGPGNRTNRATPRGYWKTGKDRDVHHR  
GKLVGMKKTLVFHSGRAPKGQRTNWVMHEYRLLDADGTQDLHVVCRIQKNGSGPQNGAQ  
YGAPYLEEDWEEEDDAIENMPASGAFAEMAAVTDTADESTEEDGNFSLKTNDLEPLQTQEY  
QPEITPVKAQGSNEETNGGGYSCDVFSLEILQEPENVCKNEEQNAIDDKFTIAELSGYP  
RQDDGYVGENGPNWIDPSNGDNTNWPLRAYSTQNHVNGTLSADGFFDTVNGTNSYSGPS  
DNQNLYLQDDGLTSSHQVGDNMPFYDASSNHKWVDGKDDYLNLDLLYPANQPLFDAG  
DDL MAYFDATEDDFKFDIMGTEDSNSQLPDMSNFVQKDDNNKFTLDGISNTALYGASSS  
GSHGNMYPDTAVPDMPMDDTVDKSFGKRLASMLGSIPAPPAMASEFPPSTGKSVVPLSAV  
NPSSSIRVTAGIIQLGGITFTGSTEHLQKNGDFNLLLSFTVEGDVSTKSIGFEPDTQMST  
TPMVLRSGLYFFVSAMILMLS YKVGLCIYSR\*

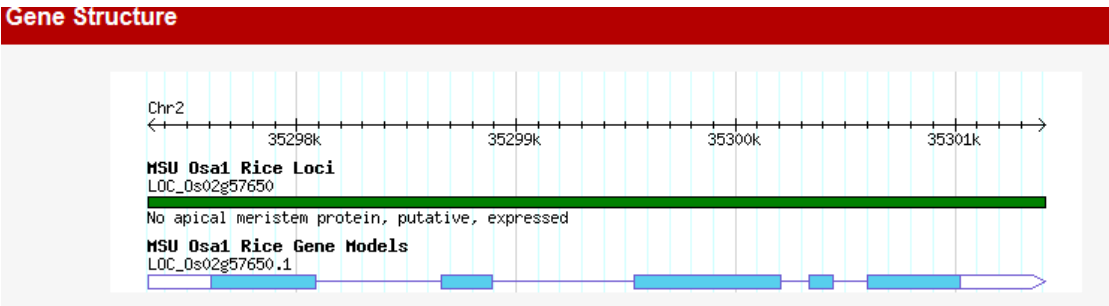

**LOC\_Os03g59730 (ONAC071) sequence information**

**Genomic sequence length:** 2624 nucleotides

**CDS length:** 1491 nucleotides

**Protein length:** 496 amino acids

Genomic Sequence

> **ONAC071**

ATGGCAGCCATCAACCCCTGTCGCCGGCGAGGTCGCCGCGCCACCGCCAAAGCTCCTCCG  
CCGGCAATGGCCACCGTCCGAGCTCCTCTGCCGGCAAACCACTACTCACCATACCACTCG

GCGTCGGCGGGCGGGCTCCTACGCTGCAAACACGCAATCGACGTCGTCGCCGGTAAGTCCG  
 GCCTCGCCGGCGATGATCTCCTCCTCCTCCTCGTCCTTGCCGCCGCAGCAGCAGCGTACA  
 TGGCAACCGCAACCAACACCTTCTCCCAAGCCAATCCAGGGCACGCCTACCAACAAGAT  
 CATCTTCCCGCCGTCGCCGGCCGCCGCTTCTTCCCGCCGCCGGCCATGCAAATGCAGTAC  
 TACCACCAGCAGCCGGACGGCGTGGCCATGGTAGGAAGCGGCCATCCCATGGCGGCTCCC  
 GTACACTCGTCGCCGCTCGCCACCACCTCTGGCAGCAACCATGCCGTTGTTCCAGACGCG  
 CCGCCGCAAGAACCTGCCAAGCGCCGACGCCGCAACACCGCCGCCGCCGCCACCGCTCGC  
 CGGGGCCGCGCCGACCCCGCGGCGCCACCGCATCCAGCGCGCATTCCGGCGCCGCCGCCG  
 CCGCAGCAGCAGCAGCAGCCAACTACATCCGCTCCCGCCATTACAGCCCAGCGCAACGAC  
 GACGTCAACCAAGAAGATGACAACCAGAGCAGCAAGAACAGCGCGGAGGAAGCGGTGGTG  
 GTCGACGGTGGTGAGCCACCTGCAGCTACATCCGCTCTCGCCATTGTTCCCGACACGGC  
 GATGTCGGCGATGCGGATCGGCCGGTGTCCCCGTAATCCGATATCCCCGAGTGCGGTTT  
 ACGCCGACCGACCAAGAACTCATCATCCACTTCTCAAACCAAAAATACAACCTCCGCGAC  
 GCCATGCCGACCAACATCATCGTCATCAAGCAATTGGACGTCTGCAAGTTGAACCTAGAC  
 GAACTCCATGGTCAGATGGATCGATCGATCCTATGATCACTCCATCGTAATGTTCTTGAT  
 GACGAACACGATTATAACTTCTTAGTTCTTGTCTTCTTTTCAGGAGATCTTGGCCTCGGG  
 AAGAGCTTGACGGGGCGTGGTACGTGTTCTCGCCGAGGAGCCGGTACAAGGAGCGCGGC  
 GTCCGGCCGGCGAGGGGGATCAAGACGACGGCGGTGGGGTACTGGAAGTCTAACAGCGCG  
 GAGGCCGACGTGTCGACGACGACGGCGAGGTGATCGGCAGGGTGAACAGCCTCACGCTC  
 GCGCTCGGCCATCAGCCGAGAGGGAAGGCGACGCACTGGAGGATGAAGGAGTATCGCATC  
 CCGCAGTTTCAGATTCCACTTGGCCAAGAAGATTCAAACCGCCTGGTAAATTGGTGCACT  
 TCCTTTAATTTATACTCCCTCCGCCCAAAAAAAGATAAATCCTGGGTTTCTGTGTCCAA  
 CATTTGACCGTCCGTCTTATATGAAATTTTTTTTATAATTAGTATTTTCATTGTTGTTAGA  
 TGATAAAACATGATTAATATTTTATGCGTGACTTGTCTTTTTAATTCTTTTCATAATTTT  
 TTAAATAAGATGGACGGTCAAACGTTGGACACGGAACAGGGTTTGTCTTTTTTTTTTG  
 GGACGGAGGAAGTATGTCCAATTCAAATTCATGCACTAGCAGTTGTAAGCTTTAACATG  
 ATACTCACTTCACCCTAAAAATATAGAAATCTATAACTGCTTGGAAACACATACTTAACACT  
 GTAAATCGATCTGAACAAGTTGATAATGTCTTTCTATATTTTAGGACGAGGTAGTAGCAT  
 TTTGAAACATGCATAAAATGGATATTAACATCATATGATGTGACGATTGTTGGACCACAT  
 ATCAATCCCATCTCGGTGATATTATTGTAGTGTAGGTGTCAAAGTCGCTTAAAAATGCT  
 ATTGTATTTATGTTTCTTTTACTTGTATTTCAGACAGTGATATAGTCTCCAGTATATAT  
 ATCTCATAATTACTTTTTGTAATTATATATTTAGAAAACCTATAAAAAATATAACCGTGTG  
 GAAGCAATTTACCTGACAAATCTACTAATAATACCATTTTCATGTATTAAATCCCATTCC  
 TTCTTAACGTATTATTGGTTATAACTTTTAGGTTTGATTGGACAGGTTTATAATGTCAGC  
 CTTCTAAGAATGAAAGTAGTAAAACTAAAACTGAATTCTCGTGGAGGAACATACAAGAGA  
 ACTGCATATAGGTTTTTTTTTTCATGCAAATTCATATCAAAGGCTATATGAGAATTTGAGT  
 TTGTTTTAAACGGGGCTAACATAGCATGCAAGCATCATCAGATTACCTCATCTTGCAATTG  
 TCTTGACGCTTGTTCCAGTGTGATAAGTTGATCTTGTTACATCTCTACATGCTCATCTT  
 GTCAGCTTACACCCATGCTCTCTCAAGACATTGTTCTTTTTTACTTTCTGCAGCTGGATG  
 AATGGGTGCTCTGTAAATTGTACCATAGCTTTGCATACAAACAGAAGGGTAAATGCAAGG  
 TTCATGAAGAGGGCAGCAAAATCAGATAGAGGTGTACAAGACCTAAGTATAGATGATGACC  
 GCAAAACATGTGACATTGAAGCCAACAAACCAAAATGGAGTGTAG

CDS

> **ONAC071**

ATGGCAGCCATCAACCCTGTCGCCGGCGAGGTCGCCGCGGCCACCGCCAAAGCTCCTCCG  
 CCGGCAATGGCCACCGTCCGAGCTCCTCTGCCGGCAAACCACTACTCACCATACCACTCG  
 GCGTCGGCGGGGCTCCTACGCTGCAAACACGCAATCGACGTCGTCGCCGTAAGTCCG  
 GCCTCGCCGGCGATGATCTCCTCCTCCTCCTCGTCCTTGCCGCCGAGCAGCAGCGTACA  
 TGGCAACCGCAACCAACCACCTTCTCCCAAGCCAATCCAGGGCACGCCTACCAACAAGAT  
 CATCTTCCCGCCGTCGCCGGCCGCCGCTTCTTCCCGCCGCCGCCATGCAAATGCAGTAC  
 TACCACCAGCAGCCGGACGGCGTGGCCATGGTAGGAAGCGGCCATCCCATGGCGGCTCCC  
 GTACACTCGTCGCCGCTCGCCACCACCTCTGGCAGCAACCATGCCGTTGTTCCAGACGCG  
 CCGCCGCAAGAACCTGCCAAGCGCCGACGCCGCAACACCGCCGCCGCCGCCACCGCTCGC  
 CGGGGCCGCGGCCGACCCCGCGGCGCCACCGCATCCAGCGCGCATTTCGGCGCCGCCGCCG  
 CCGCAGCAGCAGCAGCAGCCAACTACATCCGCTCCCGCCATTACAGCCCAGCGCAACGAC  
 GACGTCAACCAAGAAGATGACAACCAGAGCAGCAAGAACAGCGCGGAGGAAGCGGTGGTG  
 GTCGACGGTGGTGAGCCACCTGCAGCTACATCCGCTCTCGCCATTGTTCCCCGACACGGC  
 GATGTCGGCGATGCGGATCGGCCGGTGTCCTCCGTAATCCCGGAGTGCAGGTTTC  
 ACGCCGACCGACCAAGAACTCATCATCCACTTCCTCAAACCAAAATACAACCTCCGCGAC  
 GCCATGCCGACCAACATCATCGTCATCAAGCAATTGGACGTCTGCAAGTTGAACCTAGAC  
 GAACTCCATGGAGATCTTGCCCTCGGGAAGAGCTTGGACGGGGCGTGGTACGTGTTCTCG  
 CCGAGGAGCCGGTACAAGGAGCGCGCGTCCGGCCGGCAGGGGGATCAAGACGACGGCG  
 GTGGGGTACTGGAAGTCTAACAGCGCGGAGGCCGACGTCGTCGACGACGACGGCGAGGTG  
 ATCGGCAGGGTGAACAGCCTCACGCTCGCGCTCGGCCATCAGCCGAGAGGGAAGGCGACG  
 CACTGGAGGATGAAGGAGTATCGCATCCCGCAGTTTCAGATTCCACTTGGCCAAGAAGAT  
 TCAAACCGCTGCTTACACCATGCTCTCTCAAGACATTGTTCTTTTTACTTTCTGCAG  
 CTGGATGAATGGGTGCTCTGTAAATTGTACCATAGCTTTGCATACAAACAGAAGGGTAAA  
 TGCAAGGTTTCATGAAGAGGGCAGCAAATCAGATAGAGGTGTACAAGACCTAAGTATAGAT  
 GATGACCGCAAAACATGTGACATTGAAGCCAACAAACCAATGGAGTGTAG

#### Protein

#### > ONAC071

MAAINPVAGEVAAATAKAPPPAMATVRAPLPANHSPYHSASAAGSYAANTQSTSSPVSP  
 ASPAMISSSSSSLPPQQQRTWQPQTTFQANPGHAYQQDHLPAVAGRRFFPPPAMQMQY  
 YHQQPDGVAMVSGHPMAAPVHSSPLATTSGSNHAVVPDAPPQEPAKRRRRNTAAAATAR  
 RGRGRPRGATASSAHSAPPPPPQQQQQPTTSAPAITAQRNDDVNQEDDQSSKNSAEEAVV  
 VDGGEPAAATSALAIIVPRHGDVGDADRPVSPSYSDIPGVRFTPTDQELIIHFLKPKYNLRD  
 AMPTNIIIVIKQLDVCKLNLDELHGDGLGLKSLDGAWYVFSRPSRYKERVPRARGIKTTA  
 VGYWKSNSAEADVDDDEGEVIGRVNSLTALGHQPRGKATHWRMKEYRIPQFQIPLGQED  
 SNRLLTPLMSQDIVLFYFLQLDEWVLCKLYHSFAYKQKQKCKVHEEGSKSDRGVQDLSID  
 DDRKTCDEANKPNGV\*

#### Gene Structure

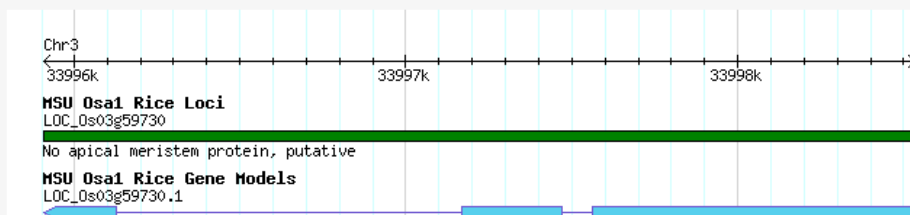

**LOC\_Os09g32260 (ONAC072) sequence information****Genomic sequence length:** 2818 nucleotides**CDS length:** 1059 nucleotides**Protein length:** 352 amino acids

## Genomic Sequence

> **ONAC072**

```
ATGGAACAAAAACAATTAATCCGATCAAAATTAAAGCCCCAAAAGTTGAGATAGCTAGC
TAGCTCATCAGGAGAGAGTGAGAGACAATATCCAGCTTGCTAGGTAGCTAGCTGCCGTTT
GCGTGTTCTTCTTTAATTTCTTCGTCGCATAATCTGTCTCGTCTCTGATAAACTTTTTAT
CTTCTTTTTTTGGGTGGTCATGCATGCTGCGGCCAATTCGTTCTTGAATTCGTTAGCTAC
TCCATTCCATATATAGATTTCGATCTTGTCTAGCTAGATACCTAGCTGCTGCTGCTGCTT
CTTCTTCTTCCTTGGTGTGTAATTTGGTTCAGCCGCTGCTAGCTATAGCTTTGCGCGGTG
TTCGTAGGGTTAGGGTTTTTGCTGTGTGTTGACGATGGCTATGGGAATGGAAGGATCGG
GAGGAGGAGGGTCGGCGAAGAAGAAAAGAGGAGAGCTTGCCGCCGGGGTTCAGGTTCCACC
CGACGGACGAGGAGCTCATCACCTACTACCTGCGGCAGAAGATCGCCGACGGCGGCTTCA
CGGCGAGGGCCATCGCCGAGGTCGATCTCAACAAGTGCAGCCATGGGATCTCCCAGGTA
ATTAATTAATTAATTAACAAACATGTGTTTGCATGCATGATCTTGTGAAATTTTATATG
CTCCTACTTAATATCTCCCTTCTCTGGCTCTCTCTCCTCGATCTTACTCACTTAGCTTG
CTTTCGCTGTGGATTAGCTTTTGTGTTTCATATGATCATATTGAATAATTCATTTTTTCC
TGCAATATATGAATAGTTTGTACTACATATATTCAGAAAGTGCATGTTTGTGTTGGCTAT
GCATGTATATGCATGCCTAGTCCTTTTTTCATGATTTTGAGCATATATTTCTTACCTATC
CTTGCCCTGCCAGAGGTAATTAGTCGCGTCTAGATTTCAAACATGCATATATGGTGCAAG
TTTTTCAATAGCTAATCCAAAAGTCTAAGCTCTTAAACTACTACATGTGTGATCCTAAA
AGAAACTATGGGATGGATTTCAAGTTTCTATGGTATTCCTTTTTTTTTTCTTACTGA
GTCTTGCTTGCTTAAACATGTGAATATGATATCATTGGTGATATAATATCTTGGTGGTA
CACATGCATATATAACATATTCAATCCCCCTTCTCTCCCTTCCCTTCTATTAGTGTGAGT
ACGTATATCTATAATCTATATTTGCATCGTCTTTGTTCTTCTTTTTTAAAAAAAACCT
TTCCTGCAAGAGTTGGTGGTTAATTTGGAACACATAAACTTCTTATTGTTATTTCTAGGG
GTCTTATATTAGAAGCTATCTTAATTCTATGTTCTTTATAAAAAAAGTAAATATCAAC
AGAAATTACAAACCAAAGCTCTAGCTTCAGCACTGTATGTGCATATGCATCGTCCTTACT
CTCATATATATATGTAGGAGATGTTTATGAGGTTCTGAATGTTCAAATATGTGGTCACAT
TTTTTCACACTTACACATTCACAATCTATATGTTCTATGTATTAATTTTCTCTAATAAAT
GTGCTCCAGAGAAGGCAAAAAATGGGAGAGAAGGAATGGTACTTCTTTAGCCTAAGGGATC
GAAAGTACCCAACTGGCGTGCGCACAAACCGAGCAACTAATGCTGGTTATTGGAACAA
CGGGAAGGATAAGGAAATCTTCACTGGACAACACCAGCAACACCGGAGTTAGTTGGAA
TGAAGAAAACCTAGTGTCTACAAAGGAAGGGCTCCAAGAGGTGAGAAAACCAATTGGG
TCATGCATGAGTACCGACTCCACTCCAAATCAATCCCCAAATCAAACAAGGTAAACAATT
CAATTGATAGTATTTTCAAACCTCACTACTATACACATGCTTCACTAAATTTACTTGTATT
AATTGAAATGTTTTTGTGATGCATCATTTTGTGTTATACTCATTATATGACAGGATGAGTG
GGTCGTCTGTGCGATATTTGCCAAGACTGCCGGCGTCAAGAAATACCCCTCCAACAATGC
TCATTCCCGATCCCAACCCACACACTAGACATGGTCCCACCTCTCCTCCCAGCTCT
ATTGCAACAAGACCCATTTGGTTCGTGGACACCACCCTTACATGAACCCCGTTGACATGGC
GGAACCTCTCCCGGTTTGCTAGAGGTACGCCGGGGTTGCACCCACACATCCAACCACACCC
```

CGGTTACATCAACCCGGCTGCGCCTTTTACACTATCAGGCCTTAACCTCAACCTTGGATC  
 CTCGCCAGCCATGCCTCCACCACCACCACCGCCACCACAATCCATCCTCCAAGCGATGTC  
 GATGCCGATGAACCAACCAAGAAGTACTACAAACCAGGTTATGGTAACAGAGCAAATGAT  
 TCCAGGACTAGCCAATGGTGTTCATCCACAGGGAACAGATGGAGGTTTTACCACGGATGT  
 TGTGTTGGAGGCACTGGCATCAGATACCAGAATTTGGATGTAGAGCAGCTGGTGGAGAG  
 GTACTGGCCTGGTAGTTACCAAATGTAGTCCTGAAGGAAATGCTTGGGGTACTGCCAAGC  
 AATTGTTGGTCTATTATGTAGGAAGACATAATTATTTGAGCTACCTTAATTTAGTCTATG  
 GATATTGTATGATTACTTAGCTAATGTTGTACCCCTTGCTTTTTAGTTTCTCAGTTCTCTT  
 GTACCTCTAGATTTTGTGTTTGGTTGTAACCTTGTCAGATTGTAGAACTAGAGGACTGTTT  
 GTTTGACCTGATTGCTTGTACATACACCTTATATATTAGTGATCAGATCATGGATAGT

CDS

> **ONAC072**

ATGGCTATGGGAATGGAAGGATCGGGAGGAGGAGGGTCGGCGAAGAAGAAAGAGGAGAGC  
 TTGCCGCCGGGTTTCAGGTTCCACCCGACGGACGAGGAGCTCATCACCTACTACCTGCGG  
 CAGAAGATCGCCGACGGCGGCTTCACGGCGAGGGCCATCGCCGAGGTCGATCTCAACAAG  
 TGCGAGCCATGGGATCTCCCAGAGAAGGCAAAAATGGGAGAGAAGGAATGGTACTTCTTT  
 AGCCTAAGGGATCGAAAGTACCCAACCTGGCGTGCGCACAACCGAGCAACTAATGCTGGT  
 TATTGGAACCAACGGGAAAGGATAAGGAAATCTTCACTGGACAACCACCAGCAACACCG  
 GAGTTAGTTGGAATGAAGAAAACCTAGTGTCTACAAAGGAAGGGCTCCAAGAGGTGAG  
 AAAACCAATTGGGTCATGCATGAGTACCGACTCCACTCCAAATCAATCCCCAAATCAAAC  
 AAGGATGAGTGGGTCGTCTGTCGCATATTTGCCAAGACTGCCGGCGTCAAGAAATACCCC  
 TCCAACAATGCTCATTCCCGATCCCACCACCCATACACACTAGACATGGTCCCACCTCTC  
 CTCCCAGCTCTATTGCAACAAGACCCATTTGGTTCGTGGACACCACCCTTACATGAACCCC  
 GTTGACATGGCGGAACTCTCCCGTTTGCTAGAGGTACGCCGGGGTTGCACCCACACATC  
 CAACCACACCCCGTTACATCAACCCGGCTGCGCCTTTTACACTATCAGGCCTTAACCTC  
 AACCTTGGATCCTCGCCAGCCATGCCTCCACCACCACCACCGCCACCACAATCCATCCTC  
 CAAGCGATGTCGATGCCGATGAACCAACCAAGAAGTACTACAAACCAGGTTATGGTAACA  
 GAGCAAATGATTCCAGGACTAGCCAATGGTGTTCATCCACAGGGAACAGATGGAGGTTTT  
 ACCACGGATGTTGTTGTTGGAGGCACTGGCATCAGATACCAGAATTTGGATGTAGAGCAG  
 CTGGTGGAGAGGTAAGTGGCTGGTAGTTACCAAATGTAG

Protein

> **ONAC072**

MAMMEGSGGGGSAKKKEESLPPGFRFHPTDEELITYYLRQKIADGGFTARAIAEVDLNK  
 CEPWDLPEKAKMGEKEWYFFSLRDRKYPTGVRTN RATNAGYWKTTGKDKEIFTGQPPATP  
 ELVGMKKTLVIFYKGRAPRGEKTNWVMHEYRLHSKSI PKSNKDEWVVCRIFAKTAGVKKYP  
 SNNAHRSRSHPHYTLDMVPPLLPALLQQDPFGRGHHPYMNVPDMAELSRFARGTPGLHPI  
 QPHPGYINPAAPFTLSGLNLNLGSSPAMPPPPPPPPQSILQAMSPMNQPRSTTNQVMVT  
 EQMIPGLANGVIPQGTGGFTTDVVVGGTGIRYQNL DVEQLVERYWPGSYQM\*

## Gene Structure

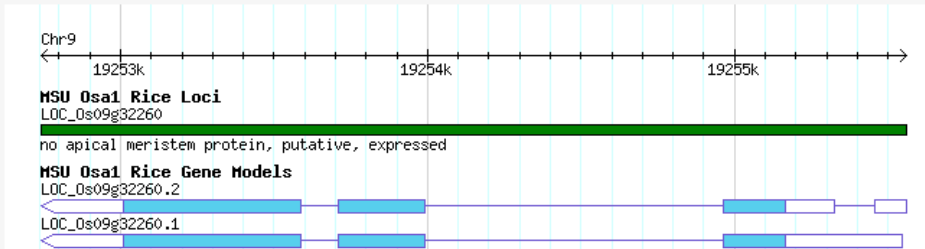**LOC\_Os01g48130 (ONAC073) sequence information****Genomic sequence length:** 4674 nucleotides**CDS length:** 1008 nucleotides**Protein length:** 335 amino acids

## Genomic Sequence

> **ONAC073**

GTTCCCTCCTCTCCTCCTTTCTCTCTCCCTCCTCCCGCGCGCGGGGTCTCGCCTTAACGT  
 TTGCCGCATATGGGGGCGACGAGCAAAGCGTAGGCCGAGGGAGGGACAGGGAGAGAGAG  
 AGAGAGAGGCTTTCTGGCTCGCTCTCTCTGCACGATCTCTCGTCTTGTGGATTATACAG  
 CCATGACATGGTGCAACAGCTTCAACGACGTGCGCGCCGTGGAGAACAACCTGGCCACCG  
 CCGCCGCGGTGGCCGCGGCAAGAAGCAGCAGCAGCAGCAGCAGGTCTCCCAGCACGTCA  
 ACCTCATCAAGACCTGCCCTCCTGCGGCCACCGCGCGCAGTATGAGCAGGTAGCTAGCT  
 AGAGCTTCCTCCCTGCTCGATCGATCGATCGGTCTCCTGTGTACATGTTGGATGGCATTG  
 AGCATGGTGTAGAGTCAGTTGCAGGCAGCGGCGGCGGCGACGATCCAGGACCTGCCGGGG  
 CTGCCGGCCGGGGTGAAGTTCGACCCGACGGACCAGGAGCTGCTGGAGCACCTGGAAGGG  
 AAGGCGAGGCCTGACGCGGGAAGCTCCACCCCTCATCGACGAGTTCATCCCCACCATC  
 GAGGGCGAGAACGGCATCTGCTACACCCATCCCAGAGGCTTCCAGGCACGTATAATATA  
 CTTACATGCATGCTTTTCTACGACTCATCGACATATATCGAATCAGTTTTAGTTTCATC  
 AGTTCATGATCTACATAAGTGCATTTGTCTCGATCAGCTAGCTTGCATGCTTAATTACAT  
 TGTGCCATCAGCTATAGCAATTGCAAAGATGATCAGATCTGGACGGGACGTGGAACTAT  
 AGGTGCTGTCCGTCACGGAAGTACTCCTGACAAAACATTTTCTTGCTTGTTGATTCTCA  
 GTTTAAATTCCTATTTTGATATAAAGTTTACTGGTCGTTTCCAATTTGATGACCTTG  
 CTTATATATGTCAATCATGCGTAGCCGCTTAGTATTTGTAACATCCACACTAGGGTATA  
 TACATGTGATCGTCCTTGCGTTTTTCATTAATTTTCGTGTATGTCCGATCGTGTGTTGT  
 GCATTTGAGCACGATACCGTATAAATATTGCTAAAGTTTGCCTTTGAAGTAATTGCTTCT  
 CCTACTTGCAAAAAGTTTATTTACATTGAAAACGAGTGATTGTGACAGCACAGTGCAT  
 CAAAGGTCCACGTCATGCAGGATACACGCAACATCAGATCAAAGGGAGAATAAACTTTGA  
 AAAGACTTGTTGCAATATGAACTGGTTTTTCCCTTATCCTTTTATATTCCTAGTATTTAA  
 TTTGCCATATATAATGGTGTATTTGCATGGGTAGGATAGTCATTGTATATTTGTGCAAT  
 AAGGCTATGTTTAGTTTGTGTGCCAAATTTTTTTTGAAGTATACGGACACACATTTAAAG  
 TATTAACGAAGACTAATAACAAAACAAATTACATTTGAAGTATTAACGAAGACTAATAAC  
 AAAACAAATTACAGATTCCGCTCTATAAACTGCGAGACAATTTTATTAAGCCTAATTAATT  
 CATTATTAGCAAATGTTTACTGTAGCATCACATTGTTAAATCATGGCATAATTAGGCTCA  
 AAAGATTTCGTCTCGTTATTTACATGCAAACGTGAATTGGTTTTTTTTTCATCCACATTTA



ATGCTACATGGATGTGTCTAAACATTTGATGTGACGAAAAAGTTGGAAGTTTAAAGAAAA  
ATTTTTGAATCTAAACATGGCCTAAGAATAACTGACAGATACTTTAAATTATTATGAGTG  
CCTTTCCTGCTTTTGGAAATATAATATTATATTCTTCAGGGGGGTTGCATTCCATTCCAC  
AGGATAACTTGTACTATTTTCTACCATAGTGATAGAAAATATTGCACCAAGAGACATTATA  
GTGCACTGATCATATTATTTTCATGGAACTCTATTTTCATATAAGCAGTTATCAATAATA  
AACCACGTGTCACCATTGTACTATATATTAATCCAGTAGAAAATGATATATTACAAATAC  
TTTTATCTAGCAAGAATTAATTATGATTAAAAAACCAATGCAAGTGGCTCTTTATGTCGT  
TTACAACGCAAAACATTTTTTTTCTTTGTTGGTGCTGGAGCTAGCGGCCGTTTCGTGGGGTA  
TTCTCATGGGAATATTGGTGTGGTAGTCTGTTAGACATATGCGTGTGAGCTGGAAAACA  
ATGTGCATGCAGGGGATGCTCCTTCCATGGTACAAAGTAATTTTCTTTACATTTTCATAGA  
TTACAGCTGACCTAAATTAATTCTATCTGTAAGAAAAATAATTAAGCCGACAAATAAAAAAT  
GTGTTATTTAGTTCCGCACACTATTTTCAGGCCATATATACATTTTATTTATATTACACC  
AAATTTACCTAGATTCAAGTGGCTGAGCCAAGATCAAGATCCACCTCGCGCGAAATGCAAA  
TATTTTTTTTACTAATAGTACTTGATTGCAAAAAATTCTATCGGGGTAAATTGACCTTACA  
GGGTCACAGCATGGCTCCACTACTATCTACATTATATTATAAGTACTCCATAATGTGGAT  
AAGGATTTTCTGAAGTTTATCGGTGAGTAATTCTTTAAATTCAAAGATAGTTTCACCCTT  
CAGCGCCATATCTCCACTAAACCACTTTAAATTCAGTCCGTTGTATAAAAAGTAATCTAT  
TTTTGATAGTTTATGGTTAAATAATGTATGAAGATTCTAGGATTGTCTATCACACTTTTA  
TAAAAGTTTAAAGTTGTAGTTAACATGCATAATCTTTTCCTTTTTTTTACAACCTGGGAAA  
TTTCATTTCTATGTTAAGAGATGCAAAACACAAATACGCCCCCACCTCCTCTTTAAATAT  
AATTTTATTCGGTGAAACTTTAAAGTTTAAACCATCAACATCTCTCAAATATGTATTTAAT  
TTGAAAATAAAAAATCAAAAGAGCAGTTTTTTTTAAGTACTTTTACAATACTAAATTTTGT  
TACACATTATTGTTATACTAATAGAAAAAAAATAGTCAAAGCTATACGAACGAATAAAGT  
TGGTAGTGTAATACTCCCTACCTCAGAATAAGTTTATTTTTGTCTCTCCCATTTATTTTA  
AAATAAATTTATTTTTGAACACTCATTGCACTAGAGTTTGTGAAAGTAAATAATAGATGC  
ACTGGAATGTAGGTAAAAATGAGGAATAATTGCATTAAGATTTGATAAAGTGAGGGTATGT  
CTTTTTGTTTTATATTGGTACATATGGGATGAGTGTAATAAATTTATTTTTTGAACAG  
AGAGAATATGTATTGAAACACCGAGCAAGTATTTTTCTTATGATGGAAAGGACGCAAAAA  
ATAACTAAACAATAACAGTTCAGGGGGAGAGAGATAGAATCAGAGAATTGCTGGAGTCGG  
CCCAAAACCATCATTAACCTGGGCCCATTCGTCATATAGTTTGACTGAATGGTCTTATGCT  
GCGTCAGCCGTCAGCCGTCAGGACATTGGAACCTGGTCAACTGGATACTACGATTACGAAG  
CCACTCTTGTTGTGTTGCTGACCTGCTGTTGCATGCATGCACGTAATATAATTGATTACA  
TTTGCATCTCTTAACCTCATTCGTGAGAGCAGTGGCAGTGTGGCACTCTACCATATTAACC  
GTACTGTTCTCTTTCTGCCGCTGTTAATTTAGGAGTCGGCAAGGACGGCCTGATCCGGC  
ACTTCTTCCACCGCCCCGTCGAAGGCGTACACGACGGGGACGCGGAAGCGGCGGAAGGTGC  
ACACCGACGAGCAGGGCGGCGAGACGCGGTGGCACAAGACCGGCAAGACGCGGCCGGTGT  
TCACCGGCGGCAAGCTGAAGGGGTACAAGAAGATCCTGGTGCTCTACACCAACTACGGCA  
AGCAGCGCAAGCCGGAAGACCAACTGGGTGATGCACCAGTACCACCTGGGCTCCGACG  
AGGAGGAGAAGGACGGCGAGCTCGTCGTGTCCAAGGTGTTCTACCAGACGCAGCCGAGGC  
AGTGCGGCGGCGGCTCGGCAGCGACGGCCAAGGACCTCTCCGTCGACCTCGTCGCCGGTA  
ACAACATCAAGGCTAGCAATGCTGCTGCTGAACACCACCATAACGACGGCGTCGGCGGCG  
GCGGCCACGGTGGAACAACAGCAGCATGCTGAAGGAAGCTGCAGGCATTGTAGATTTCT  
ACAACCCAGCGGCGGCGCTAATCGGCTACAGCCAGGCGGCTCCTAACAACAGGGCGGCTG  
CTTCTGCTCATTTGACGATGCCTAACTTTGAGGTGCACACAGGAGGTGCAGGCTTTGGCC  
CCTGATGGATGGAAGAAAAACAAAGCAAAATTAAACATATTTGACTGATGATATATATAGGT

TAGATGGAGAGGGCAGGGCAGGTATATGATGGCAAATGTGCATCATGCATGCTAGCATGG  
 TGTAATTTGCATCGAGTGAAAAAAGGAGTTTACTAAACCGTCTACGTACGTATTACTG  
 GACAATAAGGAGTGTGTCGAGTGAGTTGCTGCACAGATGTTGAAGCGTAGGGGGGTTCGAT  
 ATTCTTACAGTGTTTATTATTGTTACATGTGTACACATATATAACTTGACATTCTCAATT  
 TTTTGTTTAATGATATATATATATATATATATGTTGTTCTATACAAAAATA

#### CDS

##### > ONAC073

ATGACATGGTGCAACAGCTTCAACGACGTGCGCGCCGTGGAGAACAACCTGGCCACCGCC  
 GCCGCCGTGGCCGCGGCCAAGAAGCAGCAGCAGCAGCAGGTCTCCAGCACGTCAAC  
 CTCATCAAGACCTGCCCTCCTGCGGCCACCGCGCGCAGTATGAGCAGTTGCAGGCAGCG  
 GCGGCGGCAGCAGATCCAGGACCTGCCGGGGCTGCCGGCCGGGGTGAAGTTCGACCCGACG  
 GACCAGGAGCTGCTGGAGCACCTGGAAGGGAAGGCGAGGCCTGACGCGCGGAAGCTCCAC  
 CCCCTCATCGACGAGTTCATCCCCACCATCGAGGGCGAGAACGGCATCTGCTACACCCAT  
 CCCGAGAGGCTTCCAGGAGTCGGCAAGGACGGCCTGATCCGGCACTTCTTCCACCGCCCG  
 TCGAAGGCGTACACGACGGGGACGCGGAAGCGGCGGAAGGTGCACACCGACGAGCAGGGC  
 GCGGAGACGCGGTGGCACAAGACCGGCAAGACGCGGCCGGTGTTCACCGGCGGCAAGCTG  
 AAGGGGTACAAGAAGATCCTGGTGCTCTACACCAACTACGGCAAGCAGCGCAAGCCGGAG  
 AAGACCAACTGGGTGATGCACCAGTACCACCTGGGCTCCGACGAGGAGGAGAAGGACGGC  
 GAGCTCGTCGTGTCCAAGGTGTTCTACCAGACGCAGCCGAGGCAGTGCGGCGGCGGCTCG  
 GCAGCGACGGCCAAGGACCTCTCCGTCGACCTCGTCGCCGTAACAACATCAAGGCTAGC  
 AATGCTGCTGCTGAACACCACCATAACGACGGCGTCGGCGGCGGCGGCCACGGTGGCAAC  
 AACAGCAGCATGCTGAAGGAAGCTGCAGGCATTGTAGATTTCTACAACCCAGCGGCGGCG  
 CTAATCGGCTACAGCCAGGCGGCTCCTAACAACAGGGCGGCTGCTTCTGCTCATTGACG  
 ATGCCTAACTTTGAGGTGCACACAGGAGGTGCAGGCTTTGGCCCCTGA

#### Protein

##### > ONAC073

MTWCNSFNDVRAVENNLATAAAVAAAKKQQQQQQVSHVNLIKTCPSCGHRAQYEQQLQAA  
 AAATIQLPLPGLPAGVKFDPDQELLEHLEGKARPDARKLHPLIDEFIPTIEGENGICYTH  
 PERLPVGKDGILRHFFHRPSKAYTTGTRKRRKVHTDEQGGETRWHTKGKTRPVFTGGKL  
 KGYKKILVLYTNYGKQRKPEKTNWVMHQYHLGSDEEEKDGELVVSQVYQTQPRQCGGS  
 AATAKDLSDVLVAGNNIKASNAAAEHNDGVGGGGHGGNNSSMLKEAAGIVDFYNPAAA  
 LIGYSQAAPNNRAAASAHLTMPNFEVHTGGAGFGP\*

#### Gene Structure

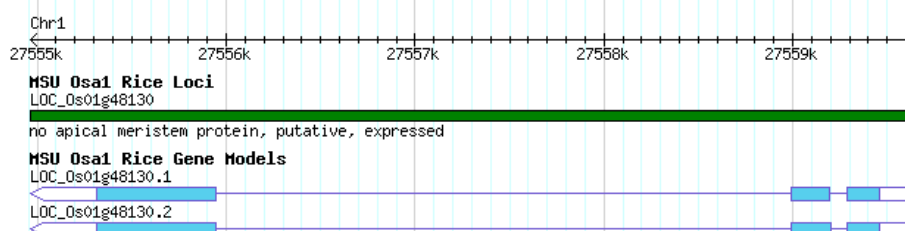

**LOC\_Os01g66490 (ONAC075) sequence information****Genomic sequence length:** 2623 nucleotides**CDS length:** 1359 nucleotides**Protein length:** 452 amino acids

## Genomic Sequence

> **ONAC075**

GCTTGCCCCAGCTACGACGACGAGGACGCTGTCCGTGTACCACATGTATGCGAGCTCGAT  
 CGACCTATCGATCTGAGCGATTCCGATCGGTTATATTAGAGAGATCAAGCATCCGAGCTG  
 CTGCTGTGTTGTGGGTACGTAGATGTATGTATAGTATAGATACCGCAGCCACCACCACCA  
 CTACCACCTCTGCTTTTTCTACCCCTCGATATATATTGTGCTAGATACTAGCCTCTTATCC  
 CTTTCTCTCTTCTCCGCCGCCGCTCCTCCTCCCAACTTGAACACTACTACTACTCCC  
 CCACGGCGAGCTCGCGTTCTCCGGGATCAACTAGCCCTAGCGACGGATGCATATGCGGAG  
 GGGGAGAGCGGCGGGAGGCGAAGGAGAGGCAGCTGCGGTGGTGGTGATGAACAGGTACGA  
 CAACAACGGGCATGCGGCAGCGCGCGCGGCTGCGGTGGCGGGAGGAGGAGGAGGAGG  
 AGGAGGGAATAAGGCGGCGGGGAGGTAGATGGGCATGAGGATGACCTGGTGATGCCCCG  
 GTTCAGGTTCCACCCGACGGAGGAGGAGCTGATCGAGTTCTACCTCCGGCGGAAGGTGGA  
 GGGCAAGCGCTTCAACGTCGAGCTCATCACCTTCCTCGACCTTACCGCTACGACCCCTG  
 GGAGCTCCCCGGTAATTAGTTAGTTACTCTCCGCCTCGATCATATCAATCGATTGATTTA  
 GGAATTGAGCATCTAATTAACAAGCTCGATGGGGGTGCAGCAATGGCGGCGATAGGGGAG  
 AAGGAGTGTTCTTCTACGTGCCTCGGGACAGGAAGTACAGGAACGGGGACCGGCCGAAC  
 CGGGTGACGGCGTCGGGTACTGGAAGCGACGGGGGCCGACCGGATGATCCGAGCCGAG  
 AACAACCGCCCCATCGGGCTCAAGAAGACGCTTGTCTTCTACTCCGGCAAGGCCCCCAAG  
 GCGTCCGAGCAGCTGGATCATGAACGAGTATCGCCTTCCCCCGCCGACACCGACCGC  
 TACCACAAGGTACCCATCCATCCATGAATCTACTCGCGCTTCGTCTTCCTCGATCGATCT  
 CTCCTTCTCATCCAATTAATTTGTAGGGGATTGAATTCTCAGTACTAGGGTTAGAGGAGT  
 TCTTGTGTTGTTGATTCTGCTTGCTTTTAGTTGCACTGCTAGCTGGCGCTCATGGTTTGC  
 CCATGAATTCTAGCGGTAGTATTTAAGAGTGGGTATGATTAGGGTTTCATGATTCTTCTT  
 TCTTTGGGTGCTGATTTTTTTTGGGGTGTTCTGCATGAGTATGCATAATTGAGTGATAGA  
 ATATGCACCTACTCGATCACTTCGATCCCTAGATGCTATATATCTTGAATATATGGGGGC  
 CTAGAATCCTAGATTCCCTCAATCATTCTGAGCTGAATTTCTCACAACTTTCAGTAATCA  
 GTAAGATGCTAAGATCTGAACTGAATTTCACTGAAAAATTAACCCCTATCCTGATCTTCT  
 CGCGTCCATGAAATTGCAGACTGAAATCTCACTATGCCGCGTGTACAAGCGCACCGGCAT  
 CGACGACGGCCATGGCCAGGTATCCACGGCGCGGTCTGTCGGCGCACTCCCGCGGCGGCGG  
 CGCGGCACCGGTACAGGACAACAAGCAAGGCTCCTCGTCGACGTCCACGCCGACGCCGCC  
 TCCAACCTCCGTCCAAGCTCCACCTCCTCAGCAGCGAGTGCACGTGCGCGCCCGCCATCGT  
 CACGGACCACGCCGCCATGGTGGCGCACAAGGCACCGTCGCGCGGCACCATCAGCAGCA  
 GCAGCAGCTCCACGCTGCCAAGCCTTGCGGCGGGCTACCTGCAGAATTCTCGATGGCTTC  
 CGCTGCGGCGGCGATCAGCAGCAGCAATTTAGCAAGACTTCGCGGCGGCATTGTACCA  
 GCAGTACTCCAAGAACACGAGCGGTGCCTTCGCCTCCACGTACTCGCTGCTCAACCTCGT  
 CAACGCGGCATCCATGGGCAGCTCCGCCGTGCCATTGATGAGCTGAGCTCGCTGGTGGG  
 CCACGGCACGCCGTCTACATTAACCCCGCGGCCGCGCAGCCACAACCTATAGTCAATTCCT  
 TCACCTGCCTACGACGCCGTCTGTCGATCAACCAACGCCGCGCGGCTCGGGACGACGAC  
 GGCGGCAGCGGCGGCGACGCTGCCGATGTCGCTCGCCGCCTTCTCCGACAGGATCTGGGA

CTGGAATAATCCGATCCCCGAGGCCGGAGGTAGGGATTACAGCACCAGTACTGGATTCAA  
GTGAATCAGCTATAGCTACAGTTCATGCACGCGTGCATGGCATTCTGATCAGATGGTACC  
ACCATGTACTACCTCTCTCTCTCTCTCTCTCTCTCTCTCTCTGTGTGTCCCACT  
CTCTGGTTCACAGTTATTAATTCTGATGAAACGATCAGATCGAGTGCCTACGTATCAGAG  
TACTATACCCATGTTAATTCTCAATTAATCCATAGATCATGCCTTCTAAACTAGTGGTAA  
GTATGATCAGGAGTTCAGGATAGGTAATTTGTATTTCTCTCTGAGTAATGATGAACTGCA  
TATAATAACCTTCCCTTGATCGATGAGGTCATAGTCATAACAA

CDS

> **ONAC075**

ATGCATATGCGGAGGGGAGAGCGGCGGGAGGCGAAGGAGAGGCAGCTGCGGTGGTGGTG  
ATGAACAGGTACGACAACAACGGGCATGCGGCAGCGGCGGCGGCGGCTGCGGTGGCGGGA  
GGAGGAGGAGGAGGAGGAGGAATAAGGCGGCGGGGAGGTAGATGGGCATGAGGATGAC  
CTGGTGATGCCCCGGTTTCAGGTTCCACCCGACGAGGAGGAGCTGATCGAGTTCTACCTC  
CGGCGGAAGGTGGAGGGCAAGCGCTTCAACGTCGAGCTCATCACCTTCCTCGACCTCTAC  
CGCTACGACCCCTGGGAGCTCCCCGCAATGGCGGCGATAGGGGAGAAGGAGTGGTTCTTC  
TACGTGCCTCGGGACAGGAAGTACAGGAACGGGGACCGGCCGAACCGGGTGACGGCGTCG  
GGGTACTGGAAGGCGACGGGGGCCGACCGGATGATCCGAGCCGAGAACAACCGCCCCATC  
GGGCTCAAGAAGACGCTTGTCTTCTACTCCGGCAAGGCCCCCAAGGGCGTCCGACGAGC  
TGGATCATGAACGAGTATCGCCTTCCCCCGCCGACACCGACCGCTACCACAAGACTGAA  
ATCTCACTATGCCGCGTGTACAAGCGCACCGGCATCGACGACGGCCATGGCCAGGTATCC  
ACGGCGCGGTTCGTCGGCGCACTCCCGCGGCGGCGGCGCGGCACCGGTACAGGACAACAAG  
CAAGGCTCCTCGTCGACGTCCACGCCGACGCCGCTCCAACCTCCGTCCAAGCTCCACCTC  
CTCAGCAGCGAGTGCACGTCGCCGCCGCCATCGTCACGGACCACGCCGCCATGGTGGCG  
CACAAGGCACCGTCGCCGCGGCACCATCAGCAGCAGCAGCTCCACGCTGCCAAGCCT  
TGCGGCGGCTACCTGCAGAAATCCTCGATGGCTTCCGCTGCCGGCGGCGATCAGCAGCAG  
CAATTTACGAAGACTTCGCGGCGGCATTGTACCAGCAGTACTCCAAGAACACGAGCGGT  
GCCTTCGCCTCCACGTACTCGCTGCTCAACCTCGTCAACGCGGCATCCATGGGCAGCTCC  
GCCGCTGCCATTGATGAGCTGAGCTCGCTGGTGGGCCACGGCACGCCGTCCTACATTAAC  
CCCGCGGCCGGCAGCCACAACCTATAGTCAATTCCTTACCTGCCTACGACGCCGTCGTCG  
CATCAACCAACGCCGGCGCCGCTCGGGACGACGACGGCGGCAGCGGCGGCGACGCTGCCG  
ATGTCGCTCGCCGCTTCTCCGACAGGATCTGGGACTGGAATAATCCGATCCCCGAGGCC  
GGAGGTAGGGATTACAGCACCAGTACTGGATTCAAGTGA

Protein

> **ONAC075**

MHMRRGRAAGGEGEAAAVVMNRYDNNGHAAAAAAAVAGGGGGGGNKAAGEVDGHEDD  
LVMPGFRFHPTEELIEFYLRKVEGKRFNVELITFLDLRYDPWELPAMAAIGKEWFF  
YVPRDRKYRNGDRPNRVASGYWKATGADRMIRAENNRPIGLKKTLVFYSGKAPKGVRS  
WIMNEYRLPPADTDYHKTETISLCRVYKRTGIDDGHGQVSTARSSAHSRGGGAAPVQDNK  
QGSSSTSTPTPPPTPSKLHLLSSECTSPPAIVTDHAAMVAHKAPSPRHHQQQQLHAAKP  
CGGYLQNSSMASAAGGDQQQFQQDFAAALYQQYSKNTSGAFASYSLNLVNAASMGSS  
AAAIDELSSLVGHGTPSYINPAAGSHNYSQFLHLPTTPSSHQPTPAPLGTTTAAAAATLP  
MSLAASFSDRIWDWNNPIPEAGGRDYSTSTGFK\*

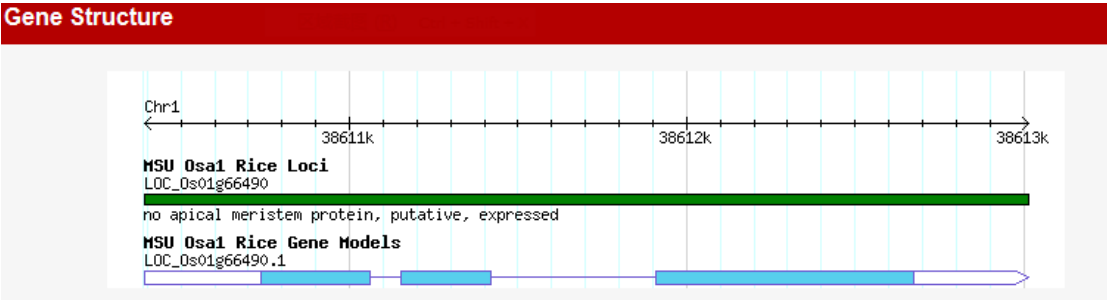

**LOC\_Os03g61249 (ONAC076) sequence information**

**Genomic sequence length:** 951 nucleotides

**CDS length:** 951 nucleotides

**Protein length:** 316 amino acids

**Putative Function:** RD26, putative

Genomic Sequence

> **ONAC076**

ATGGCCGACGACGACGAGATCGCTCTTGAGCCAGGCTACGTCTTCCACCCTTCCGACGAC  
GGCCTCATCACCTCTTCTCCGCCCCAGCATCGCCAAGATCCCCTTCGAGGACCGCCTC  
ATCAACCACGCCGACGTCTACTCCGCCAATCCGGCCGAGCTCGTCGGCGAGCACAGACCG  
GCGCCGGGCACCCATGGGAGCAGCAGCGTCTGGTACTTCTTCTGCTCCCCGCGCTTACC  
AGCAAGCGCAAGACCTCCGGGAGGCGGCAGCGCGCGGTTCGGCGGCGGCGGCGGCGGCGAG  
AGCGTGTGGAAGTCGGAGGGCGGCAAGAAGGCCGTGATCGGCGCCGATGGCCGCCGCGTC  
GGGTACCTCCAGAAGTTCTCCTATGGCGTCTACGAGTCGTCGTCGTCGGGGTCGGCGCGC  
ACGTTACGAGGCTAGGGTGGTGCATGACGGAGTACGGCCTCGACGACGACGCCATCGAC  
GGAGCAGACAAGCAGGTGCTCTGCAAGGTCTACCGCTCGCCGCGCGCGGTCTGCGCGGAG  
GCGCGCACGGCGGCGGCGGCGGAAGTCGGCCGATTCCGCATGCTCCGGCTCGAAGAGGAAG  
GCGGACGACGGCGCGGATCACCCGGAGGCGCCCGCCAGCGCGCGGCCGCGGCAAGAGGAG  
GCCGGGAGCGAGCAGCCGGCGATCCTGCCGAGTTGGACCTGGATGCGTTGCTGTCGGCG  
CCGATGGACGACAGTTTGGGAGTGGAATTCGACACGGCCACGACGAGCAGTACATGAGG  
TATCTGATGAACGACGAGCCATTGCCGTGGGCTCCGACGATGGAGGTTGCCGGCGGCGGA  
GACGAATTCATCGAGACGACGAACGGACCTTGCATGGGCGAAGAGGAGATCATCCAGCGG  
CTGGCTTCCGGAGAAAACCTCGACGACATTCTTGGCTCGAACCCTAATTAA

CDS

> **ONAC076**

ATGGCCGACGACGACGAGATCGCTCTTGAGCCAGGCTACGTCTTCCACCCTTCCGACGAC  
GGCCTCATCACCTCTTCTCCGCCCCAGCATCGCCAAGATCCCCTTCGAGGACCGCCTC  
ATCAACCACGCCGACGTCTACTCCGCCAATCCGGCCGAGCTCGTCGGCGAGCACAGACCG  
GCGCCGGGCACCCATGGGAGCAGCAGCGTCTGGTACTTCTTCTGCTCCCCGCGCTTACC  
AGCAAGCGCAAGACCTCCGGGAGGCGGCAGCGCGCGGTTCGGCGGCGGCGGCGGCGGCGAG  
AGCGTGTGGAAGTCGGAGGGCGGCAAGAAGGCCGTGATCGGCGCCGATGGCCGCCGCGTC  
GGGTACCTCCAGAAGTTCTCCTATGGCGTCTACGAGTCGTCGTCGTCGGGGTCGGCGCGC

ACGTTACGAGGCTAGGGTGGTGCATGACGGAGTACGGCCTCGACGACGACGCCATCGAC  
 GGAGCAGACAAGCAGGTGCTCTGCAAGGTCTACCGCTCGCCGCGCGCGGTCTGCGCGGAG  
 GCGCGCACGGCGGCGGCGGCGAAGTCGGCCGATTGCCATGCTCCGGCTCGAAGAGGAAG  
 GCGGACGACGGCGCGGATCACCCGGAGGCGCCGCCAGCGCGCGGCGCGGCAAGAGGAG  
 GCCGGGAGCGAGCAGCCGGCGATCCTGCCGGAGTTGGACCTGGATGCGTTGCTGTCGGCG  
 CCGATGGACGACAGTTTGGGAGTGGAATTCGACACGGCCACGACGGAGCAGTACATGAGG  
 TATCTGATGAACGACGAGCCATTGCCGTGGGCTCCGACGATGGAGGTTGCCGGCGGCGGA  
 GACGAATTCATCGAGACGACGAACGGACCTTGCATGGGCGAAGAGGAGATCATCCAGCGG  
 CTGGCTTCCGGAGAAACCTCGACGACATTCTTGGCTCGAACCCTAATTAA

Protein

#### > ONAC076

MADDEIALEPGYVFHPSDDGLITLFLRPSIAKIPFEDRLINHADVYSANPAELVGEHRP  
 APGTHGSSSVWYFFCSPRFTSKRKTSGRRQRAVGGGGGGESVWKSEGGKKAVIGADGRRV  
 GYLQKFSYGVYESSSSGSARTFTRLGWCMEYGLDDDAIDGADKQVLCKVYRSPRAVCAE  
 ARTAAAKSADSPCSGSKRKADDGADHPEAPP SARPRQEEAGSEQPAILPELDDLALLSA  
 PMDDSLGVEFD TATTEQYMR YLMNDEPLWAPTMEVAGGGDEFIETTNGPCMEEEE IQR  
 LASGETLDDILGSNPN\*

#### Gene Structure

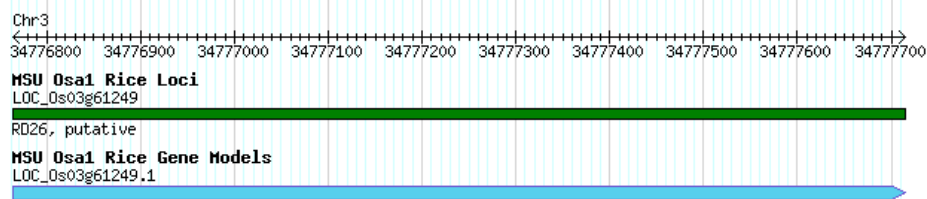

#### LOC\_Os03g61319 (ONAC077) sequence information

**Genomic sequence length:** 951 nucleotides

**CDS length:** 951 nucleotides

**Protein length:** 316 amino acids

**Putative Function:** RD26, putative

Genomic Sequence

#### > ONAC077

ATGGCCGACGACGACGAGATCGCTCTTGAGCCAGGCTACGTCTTCCACCCTTCCGACGAC  
 GGCTCATCACCTCTTCCCTCCGCCCCAGCATCGCCAAGATCCCCTTCGAGGACCGCCTC  
 ATCAACCACGCCGACGTCTACTCCGCCAATCCGGCCGAGCTCGTCGGCGAGCACAGACCG  
 GCGCCGGGACCCATGGGAGCAGCAGCGTCTGGTACTTCTTCTGCTCCCCGCGCTTACC  
 AGCAAGCGCAAGACCTCCGGGAGGCGGCAGCGCGCGGTGCGCGGCGGCGGCGGCGGCGAG  
 AGCGTGTGGAAGTCGAGGGCGGCAAGAAGGCCGTGATCGGCGCCGATGGCCGCCGCGTC  
 GGGTACCTCCAGAAGTTCTCCTATGGCGTCTACGAGTCGTCGTCGTCGCGGTCGCGCGC  
 ACGTTACGAGGCTAGGGTGGTGCATGACGGAGTACGGCCTCGACGACGACGCCATCGAC

GGAGCAGACAAGCAGGTGCTCTGCAAGGTCTACCGCTCGCCGCGCGCGGTCTGCGCGGAG  
 GCGCGCACGGCGGCGGCGGCGGAAGTCGGCCGATTGCCATGCTCCGGCTCGAAGAGGAAG  
 GCGGACGACGGCGCGGATCACCCGGAGGCGGCCCGCCAGCGCGCGGCCGCGGCAAGAGGAG  
 GCCGGGAGCGAGCAGCCGGCGATCCTGCCGGAGTTGGACCTGGATGCGTTGCTGTCGGCG  
 CCGATGGACGACAGTTTGGGAGTGGAATTCGACACGGCCACGACGGAGCAGTACATGAGG  
 TATCTGATGAACGACGAGCCATTGCCGTGGGCTCCGACGATGGAGGTTGCCGGCGGCGGA  
 GACGAATTCATCGAGACGACGAACGGACCTTGCATGGGCGAAGAGGAGATCATCCAGCGG  
 CTGGCTTCCGGAGAAACCCTCGACGACATTCTTGGCTCGAACCCTAATTAA

CDS

> **ONAC077**

ATGGCCGACGACGACGAGATCGCTCTTGAAGCCAGGCTACGTCTTCCACCCTCCGACGAC  
 GGCTCATCACCTCTTCTCCGCCCCAGCATCGCCAAGATCCCCCTTCGAGGACCGCCTC  
 ATCAACCACGCCGACGTCTACTCCGCAATCCGGCCGAGCTCGTCGGCGAGCACAGACCG  
 GCGCCGGGCACCCATGGGAGCAGCAGCGTCTGGTACTTCTTCTGCTCCCCGCGCTTACC  
 AGCAAGCGCAAGACCTCCGGGAGGCGGCAGCGCGCGGTGGCGGGCGGCGGCGGCGGAG  
 AGCGTGTGGAAGTCGGAGGGCGGCAAGAAGGCCGTGATCGGCGCCGATGGCCGCCGCGTC  
 GGGTACCTCCAGAAGTTCTCCTATGGCGTCTACGAGTCGTCGTCGTCGGGGTCGGCGCGC  
 ACGTTCACGAGGCTAGGGTGGTGCATGACGGAGTACGGCCTCGACGACGACGCCATCGAC  
 GGAGCAGACAAGCAGGTGCTCTGCAAGGTCTACCGCTCGCCGCGCGCGGTCTGCGCGGAG  
 GCGCGCACGGCGGCGGCGGCGGAAGTCGGCCGATTGCCATGCTCCGGCTCGAAGAGGAAG  
 GCGGACGACGGCGCGGATCACCCGGAGGCGGCCCGCCAGCGCGCGGCCGCGGCAAGAGGAG  
 GCCGGGAGCGAGCAGCCGGCGATCCTGCCGGAGTTGGACCTGGATGCGTTGCTGTCGGCG  
 CCGATGGACGACAGTTTGGGAGTGGAATTCGACACGGCCACGACGGAGCAGTACATGAGG  
 TATCTGATGAACGACGAGCCATTGCCGTGGGCTCCGACGATGGAGGTTGCCGGCGGCGGA  
 GACGAATTCATCGAGACGACGAACGGACCTTGCATGGGCGAAGAGGAGATCATCCAGCGG  
 CTGGCTTCCGGAGAAACCCTCGACGACATTCTTGGCTCGAACCCTAATTAA

Protein

> **ONAC077**

MADDDEIALEPGYVFHPSDDGLITLFLRPSIAKIPFEDRLINHADVYSANPAELVGEHRP  
 APGTHGSSSVWYFFCSPRFTSKRKTSGRQRRAVGGGGGSESVKSEGGKAVIGADGRRV  
 GYLQKFSYGVYESSSSGSARTFTRLGWCMTGYGLDDDAIDGADKQVLCKVYRSPRAVCAE  
 ARTAAAKSADSPCSGSKRKADDGADHPEAPPSARPRQEEAGSEQPAILPELDLDALLSA  
 PMDDSLGVEFDATTEQYMRYLMNDEPLPWAPTMEVAGGGDEFIETTNGPCMEEEEIIQR  
 LASGETLDDILGSNPN\*

**Gene Structure**

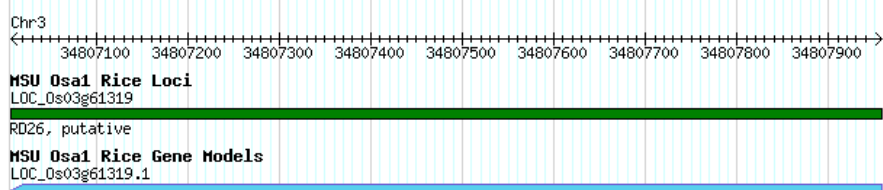

**LOC\_Os03g62470 (ONAC078) sequence information**

**Genomic sequence length:** 396 nucleotides

**CDS length:** 396 nucleotides

**Protein length:** 131 amino acids

Genomic Sequence

> **ONAC078**

ATGGACGACGACGAGATCGCTCTGGAGCCAGGCTACGCTTTCGGCCCTTCCGACGACGGC  
CTCATCACCTCTTCTCCGCCCAAGATCGCCAAGATCCCCTTCGAGCACCGCCTCATC  
AACCACGCCGACGTCTACTCCGCCGATCCGACGGAGCTCGTCGGCGAGCACAGACCGGCG  
CCGGGAACCCATGGGAGCGGCAGCGTCTGGTACTTCTTCTGCTCCCCGCGCTACACCAGC  
AAGCGCAAGGCCCTCCGGGAGGCGGCAGCGCGCGGTTCGGCGGCGAGAGCGTGTGGAAGTCG  
GAGGGCGGCAAGAAGGCCGTGATCGGCGCCGATGGCCGCCGCGTCGGGTACCTCCAGAAG  
TTCTCCTATCACTACACTGGTCAAGGTCACCTGTGA

CDS

> **ONAC078**

ATGGACGACGACGAGATCGCTCTGGAGCCAGGCTACGCTTTCGGCCCTTCCGACGACGGC  
CTCATCACCTCTTCTCCGCCCAAGATCGCCAAGATCCCCTTCGAGCACCGCCTCATC  
AACCACGCCGACGTCTACTCCGCCGATCCGACGGAGCTCGTCGGCGAGCACAGACCGGCG  
CCGGGAACCCATGGGAGCGGCAGCGTCTGGTACTTCTTCTGCTCCCCGCGCTACACCAGC  
AAGCGCAAGGCCCTCCGGGAGGCGGCAGCGCGCGGTTCGGCGGCGAGAGCGTGTGGAAGTCG  
GAGGGCGGCAAGAAGGCCGTGATCGGCGCCGATGGCCGCCGCGTCGGGTACCTCCAGAAG  
TTCTCCTATCACTACACTGGTCAAGGTCACCTGTGA

Protein

> **ONAC078**

MDDDEIALEPGYAFRPSDDGLITLFLRPKIAKIPFEHRLINHADVVSADPTELVEHRPA  
PGTHGSGSVWYFFCSPRYTSKRKASGRRQRAVGGESVWKSEGGKKAIVIGADGRRVGYLQK  
FSYHYTGQGHL\*

**Gene Structure**

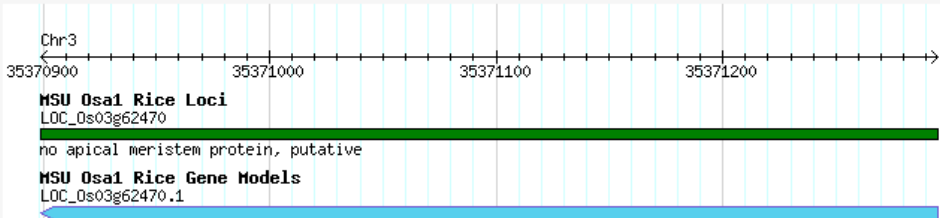

**LOC\_Os04g35660 (ONAC079) sequence information**

**Genomic sequence length:** 1087 nucleotides

**CDS length:** 603 nucleotides



**Protein length:** 200 amino acids

**Putative Function:** no apical meristem protein, putative, expressed

#### Genomic Sequence

##### > ONAC079

GCAAGCACCTGCTCTCATCTTCTCCCCGTAGCCTTAGCTTCCACCCGCCTGCCTAGTCTA  
TCTACTTCTTCTGCCTTACACTTCACCTCAGCCATGGCTGGAGCTTCCAACCTTCCTCCC  
GGTTTCCACTTCTTCCCGTCAGATGAAGAGCTCATCATTTCATTTCTCCGCCGCAAGGCC  
TCCCTCCTCCCTTGCCAACCTGACATCGTCCCTACTCTGATCTTGAATCTCTATGATCCA  
TGGGAATTGAATGGTATGGGTCTAATATTTACCTCTATATGTTGTTGTTTTGTCTTAGT  
CATAGCTGAGTGTTGATGTCAAACATTTTTACAGGTAAAGCACTCCAATCCGGTAACCAA  
TGGTACTTCTTCAGTCATGCGACGCAGACTAGGACCTCGCCAAATGGGCACTGGAAACCC  
ATTGCTGATGAGACAGTTATTAGTGGTGGTTGTAATGTTGGCCTGAAGAAGACCCTCATT  
TTCTTCATTGGGGAGCCCTTTGAGGCGATCAAACTAACTGGGTCATGCATGAGTACCAC  
CTAATGGATGGGAGTACCAATTGCAGCAGTAGCAGTACTTCAAGCAGTTCAAGCAAGCGG  
TCCCACAAGAAAAAAGGTCACTCAGACACAGTGAGTGCTGTACTGCTATATGCGTGTTTA  
TTTATCGTGTTTAGTACTATATATCAATTGCATGACTATTTAACGTGGCTAACATATATG  
CATGCATGATCATTGCAGGAATCCAAGAACTGGGTGATATGCCGAGTGTTTCAATCGAGT  
TATGATTACAAGTGAGCTTCCATGAGGAGGGCACGGAAGTGCATGCTTAGATGAGGTG  
TTTCTATCCCTAGACGACTATGATGAAGTCAGTTTTGCCAAATAATTAGAACCTTTATAG  
GAGCTGTTAGTAGGTTAGGTCCTTACCTATCAAAACATTTGATCACAGTGATTCTCGCA  
AGAAACTTAGTTTTATAAGATCAAAATGGTTTGATAGCTGTTGAACCTAATGATCTAATA  
GACCAGATATGTAATTACTCATCTCCTCCCAGGAGTTGCATGCAACAAATTTGAGCTAGT  
TTTTAAG

#### CDS

##### > ONAC079

ATGGCTGGAGCTTCCAACCTTCCTCCCGGTTTCCACTTCTTCCCGTCAGATGAAGAGCTC  
ATCATTTCATTTCTCCGCCGCAAGGCCCTCCCTCCTCCCTTGCCAACCTGACATCGTCCCT  
ACTCTGATCTTGAATCTCTATGATCCATGGGAATTGAATGGTAAAGCACTCCAATCCGGT  
AACCAATGGTACTTCTTCAGTCATGCGACGCAGACTAGGACCTCGCCAAATGGGCACTGG  
AAACCCATTGCTGATGAGACAGTTATTAGTGGTGGTTGTAATGTTGGCCTGAAGAAGACC  
CTCATTTTCTTCATTGGGGAGCCCTTTGAGGCGATCAAACTAACTGGGTCATGCATGAG  
TACCACCTAATGGATGGGAGTACCAATTGCAGCAGTAGCAGTACTTCAAGCAGTTCAAGC  
AAGCGGTCCCACAAGAAAAAAGGTCACTCAGACACAGAATCCAAGAACTGGGTGATATGC  
CGAGTGTTTCAATCGAGTTATGATTACAAGTGAGCTTCCATGAGGAGGGCACGGAAGT  
TCATGCTTAGATGAGGTGTTTCTATCCCTAGACGACTATGATGAAGTCAGTTTTGCCAAA  
TAA

#### Protein

##### > ONAC079

MAGASNLPPGFHFFPSDEELIIHFLRRKASLLPCQPDIVPTLILNLYDPWELNGKALQSG  
NQWYFFSHATQTRTSPNGHWKPIADETVISGGCNVGLKKTLIFFIGEPFEAIKTNWVMHE

YHLMDGSTNCSSSSSTSSSSSKRSHKKKGHSDTESKNWVICRVFESSYDSQVSFHEEGTEL  
SCLDEVFLSLDDYDEVSFAC\*

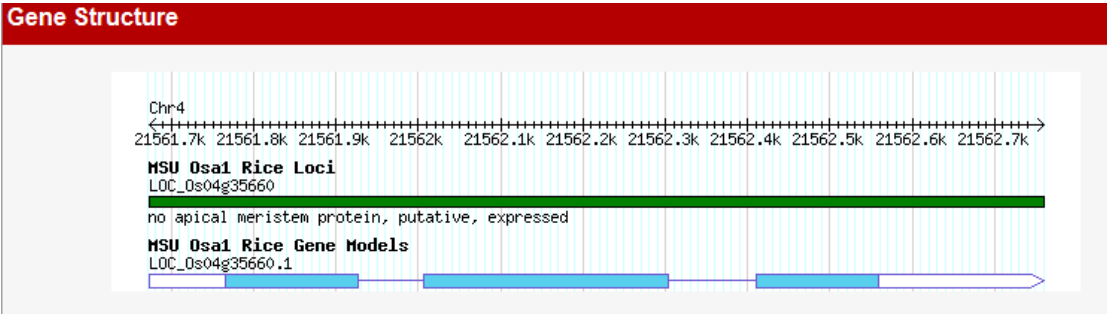

**LOC\_Os04g39960 (ONAC080) sequence information**

**Genomic sequence length:** 849 nucleotides

**CDS length:** 849 nucleotides

**Protein length:** 282 amino acids

**Genomic Sequence**

**> ONAC080**

ATGGCGTCTTCCGCCCATATGGCTGCCGTGCTGAACCTGCCCTGGGGCTACCGCTCCGC  
CCCAGCGACCGCCAGATCATCGCCAACTACCTCGGCCCCATGGCGATCCACGGCGCCGAC  
TCCCTCCCTCAGAGGGGAGACGTCGTGGAGGGCGTGGACGTCTTCGCCACGCGCCCTGCC  
GCGATCCCCCTTCGAGCCGCGGCGCCACGTGTTTGGGCGGGACGAGGTGCGCGCCTACTTC  
TTCGGGGACCAAGCCACGACAGCCGGGGCCGCGAGGTGCCCGGAGGTGCATGGCTTCCG  
TGCGGCGGCGGCGACAAGGCGTACTCCGGCGGCGCGGACGGCGGGAGGCGGTCGCGTAC  
AGGCGCAAGTACGAGTTCCGCGCCGCCAACGAGGAAGCCGACCGCGCGGGGAGGAGGCG  
GCGACGCCGCGCGGCCGAGATGGCGGATGAAGGAGTACCGGCTCAACAAGAGCGCCGCC  
GAGTTCCGCGCGCGTACGCGCAGCCCAACCCCAAGGCGAACATGGACTGCGTGGTCCGC  
GAGATCTACAGAAAGGCGGTGCCACCTCCAACGCCACCGTCCGGCCGCTCCGGCGACGAG  
GAAATGCAGGAAGGCTCCGACTACTCCGTCTATGGACGAGGACGAGTTGGTGGACTACTTG  
CTTCAGGGCTTCGAGGACGGCAACTTCGACGAGGACCAGGACCAGCCCGCAGCGGCAGAG  
GACGGCGACTACTCCGACGAGGACGAGGACCAGCCCGCGGCAGCAGAGGACGGCGACTAC  
TCCGACGAGGACCAGGACCAGCCCGCGGCGGCAGAGGACGGCGACTACTCCGACGAGGAT  
GAGCCCTGA

**CDS**

**> ONAC080**

ATGGCGTCTTCCGCCCATATGGCTGCCGTGCTGAACCTGCCCTGGGGCTACCGCTCCGC  
CCCAGCGACCGCCAGATCATCGCCAACTACCTCGGCCCCATGGCGATCCACGGCGCCGAC  
TCCCTCCCTCAGAGGGGAGACGTCGTGGAGGGCGTGGACGTCTTCGCCACGCGCCCTGCC  
GCGATCCCCCTTCGAGCCGCGGCGCCACGTGTTTGGGCGGGACGAGGTGCGCGCCTACTTC  
TTCGGGGACCAAGCCACGACAGCCGGGGCCGCGAGGTGCCCGGAGGTGCATGGCTTCCG  
TGCGGCGGCGGCGACAAGGCGTACTCCGGCGGCGCGGACGGCGGGAGGCGGTCGCGTAC  
AGGCGCAAGTACGAGTTCCGCGCCGCCAACGAGGAAGCCGACCGCGCGGGGAGGAGGCG

GCGACGCCGGCGCGGCCGAGATGGCGGATGAAGGAGTACCGGCTCAACAAGAGCGCCGCC  
GAGTTCCGCCCGCGGTACGCGCAGCCCAACCCCAAGGCGAACATGGACTGCGTGGTCCGC  
GAGATCTACACGAAGGCGGTGCCACCTCCAACGCCACCGTCCGGCCGCTCCGGCGACGAG  
GAAATGCAGGAAGGCTCCGACTACTCCGTCATGGACGAGGACGAGTTGGTGGACTACTTG  
CTTCAGGGCTTCGAGGACGGCAACTTCGACGAGGACCAGGACCAGCCCGCAGCGGCAGAG  
GACGGCGACTACTCCGACGAGGACGAGGACCAGCCCGCGGCAGCAGAGGACGGCGACTAC  
TCCGACGAGGACCAGGACCAGCCCGCGCGGCAGAGGACGGCGACTACTCCGACGAGGAT  
GAGCCCTGA

Protein

> **ONAC080**

MASSAHMAAVLNLPGYRFRPSDRQIIANYLGPMIAIHGADSLPQRGDVVEGVDFVATRPA  
AIPFEPRRHVFRDEVRAIFFGDQPTDSRGREVPGGAWLPCGGGDKAYSGGADGGEAVAY  
RRKYEFRAANEEADRAGEEAATPARPRWRMKEYRLNKSAAEFRRAYAQPNNKANMDCVVR  
EIYTKAVPPPTPPSGRSGDEEMQEGSDYSVMDEDELVDYLLQGFEDGNFDEDQDQPAAAE  
DGDYSDEDEDQPAAEDGDYSDEDQDQPAAEDGDYSDEDEP\*

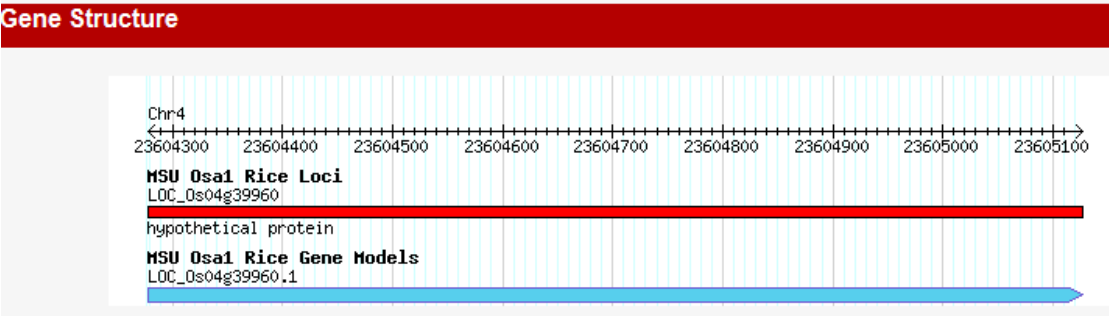

**LOC\_Os04g40140 (ONAC081) sequence information**

**Genomic sequence length:** 4064 nucleotides

**CDS length:** 627 nucleotides

**Protein length:** 208 amino acids

Genomic Sequence

> **ONAC081**

TCTGGCCTCTGCCTCACTTGCCAAGAAGTTCCTCCTCTCCTCTCGCTTCTCCTCCTCTCT  
CCCCCTCGGATGCTCTCTACCTCCCAGCCCAAGCTCCCGTCGCAGCGCCGCACCCATGG  
CAAGGTGAGCATCGGGGGTGGGGGTTTCTCCGATCGATCGGGGTGTGGCCTGGTTTGGTT  
TAATCGGTTCTTTTTTCTGGGGGTGGTTTCTTCCTTCGCTTTTCTTCTGTTTCGTTTCG  
AAGGGCTAGTTTTTTTTTTAATCCTCTCTCTCTTCTCTTTTCCGTGTCTGATGAGCGGA  
TCGATTTGGGGATTTTCGCTCCGCCAGCTGGCTCGTGGTTCCGGGTTGACCTGAGGAGGT  
GTAATGCAGTGGTGGTTGGTCTGATCGGTGAGAGGTGGATTCTGGTGTGGGGTTTTGG  
AAGGGGTGGGGGGATCGATCGCTTTGGATTCTTGTGTGTGGCTCGAGTGGAGATCGAGCT  
GGTACTGGTGGCGTGATGGAATCGTGGCCGGAATGCATGAGATCGGTGGATATAGCGGT  
CTCGGATGGTGCATGCGGGGTGGGGGTTTTTGCAGGTTACTGAGGTTTGAGGGGGAATC  
TTACGCTGGAAGCAACCAAGAAACAAGCAGAGGAGGAAGACTCTGCTTCTGTTCTATGGA

GACTGGGTCATGTGTCGCTCTCCGATCGTTCACAGCTGCTCGTTGCTAACAGAGGGGAAG  
ATTTTCGGATTTCGTGTCATCTGATTGCCGATTGGATTGCCACCGGTCTGGGTGATGGTGCA  
GGAATGGCGTTTCAGAATCGATGGACAGAAGATTTTACGCTGTCAGAATGTGATTTTGGAT  
GAAACCTTACGCTGTCTGAAACTCTGAATGTCCGGTTTGGGTGGATTTTTCAGCATTCTA  
GCTGCTAAGTGAAGGCTTATTGTTGCTGATGGTCAGGCTTGTACAGTTGCAGCTGCTAA  
GGTGAAGGGCTCAGCTTCCAGATTTTCGATACGTTTGTAGTACTCCTAGAACACTGGATCA  
GTGAGTAAATGAGCTGTGGAGCCTATGGTGAATTACCCTGTTCTTTTGGACCCTTGCCTA  
GCCAATCATAATGGAGAGTAATGTGGCAACAGTTTAGGGAAGTAAGCAGATCCAAAGTGG  
ATTGCAGTTAAACCATTAAAAATTTGAGGCATATAGCCATTTCGCTGCTATAGATTGCTCT  
GTCCATTTACATTTGGTTTCTTGAACAGAGCAATCTATAGCAGAAAGCAGGGAATGAGG  
GAATGGAACCTCATGGAAAGTCAACAGAGTGGAGATATGTCAATCTTTGAATTTCCAACA  
ACAGCATTGCATGACGAATGATGTGGAGACCAAAAGTAGTACTAGACTAAGTACTAGTTA  
GTGTGCTACCATCCATGTGCTCAACATTTGGAATCATGCAGGCCTAGGACACATCTGAAT  
TAGATAGCTGTAAATTTTAATCTTACTCCTACCATTTTGTGTAGTAAATGCACAAGGC  
ACAAGGTAGTAAGTGTACGAAGTACGGTTTGTTAATTAATTATGTTAACCCCTGTTATAT  
TCATGATTAGTTGCTATTAATTTCTGTTGAACCAATTAGTGCCTGTCCTATATCTAGAAG  
TTCAGACTAAGTTCCGTATATGTAGAAGAAGTCTTCCATATCTGTAAGTCTAGCACAATT  
ATACTATGTTAAGCTGATTAAACCTTAAAAATCTGAACTTTTGGTGAATGACAAGGCGATA  
GATTGTCCCTTGAGATAAGTTGGGACTTTTGTATGATGAACATGTCTCACTTCTGCCTT  
TTACTGCAGGCCATGGATTATAGCTGGTGGAAAGGTAATTGCTACAAAAATAAGAAATGC  
AACTCAGCTTCTGAGTTGTAAACTTGGAGAATTGGTTCCAGAAGCATGGAGGGAATGCCC  
AAACTGCAAAATGTCACATTGATAATAGCGATGTAAGTTCAGCTACCTATTGTACTTATGA  
ATGCTTGATTTAACTTTTGTAGTTGCTGATACTCTGATGATGTTTTGCCATTAAA  
GTTTCGTGTGTAGAAAAATCAACACTAGACAACATTACTTCCAAAGAGCGATGCTCTGGTG  
CTCTCTACTGGTAGTATTATACTATCAGTCTACTGGTAGTATTATACTACCGGTATATTG  
GGGGTAAATTAGTAATTTACTAATACTATGATTAGGAGTAACTATTATTTATGTTTTTTT  
TCCGGCTAAATCGATTTATGATCATTTCATTATTCCTAAAAAAGGTGTTTTGCTCATTAC  
TGTGCTGTGTGCTACACTTTATTCCTATTGTCTGGCTCCACGTGTCACAATTTCAATA  
TAAAATCCACAAAGCTTGTGGCTCCCTTGCCTTGGGTATGACGAGGTGGCTTTAAGCAG  
AAATATCAGTAGGGTAAAGTTTCACATTTTCTATGCATTTCTTGTGGTGCTAAATAAAAA  
ATCTCATTGCAGGTTACTTTACAGTGGCCAGAATTCCCTGACGGTGTAAATTTGATCCA  
TCTGATCTTGAAGTACTTGAACATTTAGAAAAGAAAAATTAACCTGGGAAATCCAGGGCCT  
CAGGGTCTTATTGATCACTTCATCCCAACTCTAGAAAAGGTGGAAGGAATCTGCTATACA  
CATCCTGAAAATCTCCCCGGTACTGGATTATATATTTTAAGTTGTTATCAGGCCTTTTGA  
ACTAGTAGTAATTAGTTAGCTCATGTGTCATACATTCCCTCTGTAATTCGTGTCAGGTATCA  
AGCTGGACGGCACCAGCAGCCATTTCTTCCACAGAATATCAAACGCATATGGTTCTGGTC  
AGCGCAAGCGTAGAAAAGATAAGCCACACCGGCCATGCTGCTTCTGACGAGAACATAAGAT  
GGCAGAAAACTGGAAAAATCCAACAGATTTACCATAACGGTGTCTTAAAAGGATGGAAGAA  
AATACTGGTTCTTTACAAAGGCTCCAAAAAGAACAAGATAGTACAAGCTAATTGGGTAT  
GCATCAATATAATCTTGGTGTGGAAGAAGCGGGGAGGACGGAGAGCTTGTGTTTCCAA  
GGTATTCTACCAATTATCCTCCAAGCAAACTGGCACGCCTGAAATGGACTCTGTACTGA  
AGAAGCATCTGATGCACTGACCATAAGAAGTGATCCCATTACACCCATAACGAACCCCTCC  
GCTGCCTCGCTGCCTGATGAACAGCCCGTGTGACACGGAGCAGAATGGCACCATTTTACA  
TGATCAGGTAAGCCATGCTACTGATAATGAGGATAGGGCAAACAAATTAATTGCTCTTTC  
TTTTTTTTCTTTTTTTTTTGACAATACTTCATGCTGTTGCATTGCTGAATTTTACACAGGAG

GGGGAATGCAGCACATCCACTCTCCGGCCCATGGTAGAAGCTGGAAACCGTGCAGGGTGT  
TCTGCTGGAGCGTCAACAGCCGGGGACTTCAACGAAGATCTGCTGCAGCGCTGCGAGTTT  
CCGGAGGACCCCGTCCCAACTCTTGATGACACGCTGCCTTTTCTTTACACGGACGAAACG  
GACCTTTTCAGCTGGGAAGTAAGTGTGCTTTGCTCGTAATACTCCTTTCTTTTCTGACT  
TATATTTTGTACGGTTAAGAACAAAATCTGATTTGCCTTTCCTGAATTGAATTTCTTGC  
AATAGGATTTTCAATTTCGGGTCGCAGGAAAGCTTCGGCTGGGTGGATGGGGATCACACGT  
AAGTGATGCTCTGAGGAGTTGTGGGAAGCAGCGGTGCTGCAGGAAGACGCCTTCAGGGTT  
TAGGGTCTAGGGTTCGCCACTCTAGTGAGCTGCAACACTCTTTTAGAGCTGCAGCGCTTT  
TTATAAGAGTGACGAAATTTGGAGTGGTCAACCCCTCATATAACTGATCTCCGAAAATTT  
TGTATATGGATTTGCGTATTAAACACCAGCTCTATGTAGCCGAGCAGTAAGTATAGTAGTC  
TCTCTTCCCGTAAAAAAAAAAAAAAAAAGAAAAAAAAATGTAGCATCTCAACCTGAAAATGTT  
CTGTGAGAACATGTTTATGTGTTGTAACCTTTGAACCTTGTTTA

CDS

> **ONAC081**

ATGGCACAAAACCTGGAAAAATCCAACAGATTTACCATAACGGTGTCTTAAAAGGATGGAAG  
AAAATACTGGTTCTTTACAAAGGCTCCAAAAAGAACAAGATAGTACAAGCTAATTGGGTT  
ATGCATCAATATAATCTTGGTGTGGAAGAAGGCGGGGAGGACGGAGAGCTTGTGTTTCC  
AAGGTATTCTACCAATTATCCTCCAAGCAAACCTGGCACGCCTGAAATGGACTCTGTTACT  
GAAGAAGCATCTGATGCACTGACCATAAGAAGTGATCCCATTACACCCATAACGAACCCT  
CCGCTGCCTCGCTGCCTGATGAACAGCCCGTGTGACACGGAGCAGAATGGCACCATTTC  
CATGATCAGGAGGGGGAATGCAGCACATCCACTCTCCGGCCCATGGTAGAAGCTGGAAAC  
CGTGACGGGTGTTCTGCTGGAGCGTCAACAGCCGGGGACTTCAACGAAGATCTGCTGCAG  
CGCTGCGAGTTTCCGGAGGACCCCGTCCCAACTCTTGATGACACGCTGCCTTTTCTTTAC  
ACGGACGAAACGGACCTTTTTCAGCTGGGAAGATTTTCAATTTCGGGTTCGCAGGAAAGCTTC  
GGCTGGGTGGATGGGGATCACACGTAA

Protein

> **ONAC081**

MAQNWKIQQIYHNGVLKGWKKILVLYKGSKKNKIVQANWVMHQYNLGVEEGGEDGELVVS  
KVIFYQLSSKQTGTPEMDSVTEEASDALTIKSDPITPITNPPLPRCLMNSPCDTEQNGTIS  
HDQEGECSTSTLRPMVEAGNRAGCSAGASTAGDFNEDLLQRCEFPEDPVPTLDDTLPLFLY  
TDETDLFSWEDFQFGSQESFGWVDGDHT\*

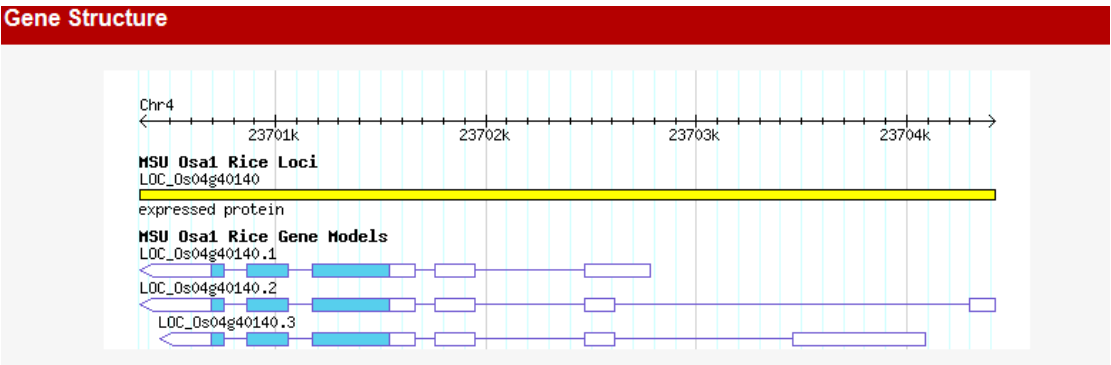

**LOC\_Os04g45340 (ONAC082) sequence information**

**Genomic sequence length:** 2352 nucleotides

**CDS length:** 579 nucleotides

**Protein length:** 192 amino acids

Genomic Sequence

> **ONAC082**

CTCATGCGATCGATATAGCTGCTCCATCCGTTTGAAGGCTGGCTGCTGCTGGCCGAGGGA  
GGCGCTGCATGCTGCTGCAAGCTACGAAGCAGTAGCAATTGCAGGCGCGCGGCACAAGG  
TAAGAGACGGCTCGTCCATTTCCAACCCGTGGTTTTCTGCTTGATCGATGATGCTAGCTT  
GTTTTACCTTTTGTGTTTACCGCGCACTGTGCGCGCGTGCTGAAGTGGGGTACGTGCT  
GCGTGATTAGCGATGTCTTTTCTTCCGTCTTCGTGGGTACAAGGTTTCGCGAGTCCCTAGG  
GCCTAGGTGTGTGCACTGTGCTTTGTTCGGATAGGACGGCGAGCAACTTTAGCTCTCCCTA  
GTTTGCGCTCGGTTTGTAGCTGAACAACCTGAACTCGATGCTCCTGTCTCCTCTATC  
TCGTCTTCTTTTTCACACAAACCGGCAAAGGTTTCATCATGGATGCATAAATGGAAGTGG  
AAGCAAGGATACACCTCCTGTTGATCAAGCTAGTCTTCTATAGGAGTGCAGAAGAGCGAG  
AATCAGCCTCTGGTCAGAGAACTTCACTGGATGAATTTCCGATTCATCTCCTACAAAA  
AGAAAGAACTCCTCAGAATCGTTAGAGAGACCAGCCTCTGGTCAGAGAACTTCACTGG  
ATGAATTTCCGATTCATCTCCTACAAAAAGAAAGAACTCCTCAGAATCGTTAGAGAGA  
CCAGGTGCAAACCGATCGAATGCTTTCTCAATTAAGAAAAGGAGTATTTCTGTGAGATT  
TCCTGATTCTAGCTAGTACTAGTAGACATGAGCTAACGAGAAGTTGGATGCTATATGTTT  
AAATTCTTCTTGAATTCGTTACACATGCATATATGCATCGTTATCAAACCTAGCCTGTA  
ACTGAAATATAGCTTCTTATCGTGCATGCAGTTCATATTAACCTTGCTACCAGTTCGGGAG  
CTATACTTTGATCCGCGGAAGAAGATGGACGCATTCTCCCATGTCCCGCCAGGTTTTCTGT  
TTCCACCCTACTGACGAGGAACTCGTGGATTACTACCTTAGGAAGAAGGTAGCACTGAAG  
AAGATAGACTTGACGTCATAAAAGATATTGATCTGTACAAAATTGAGCCTTGGGACCTA  
CAAGGTAATCACAATTTACTCCACTTATTCTACAAGCTTGCTGCTTATCTCTAACCTGT  
AATATCATAACTAGCTAATTAATCGACATCTCCAAAATGATGCTCAAACAGAACAATGCA  
AGATTGAAAACGAGGAGCAGAACGAGTGGTACTTCTTCAGCCACAAGGACAAGAAGTACC  
CGACGGGCACACGCACCAACAGGGCGACCACTGCCGGCTTTTGGAAAGGCCACCGGGAGGG  
ACAAGCCGATCTATGTCAAGAACTGCCTTGTGTTGGATGAGGAAGACGTTGGTTTTCTACA  
GGGGCCGGGCTCCCAACGGACAGAAGTCGGAAGTGCATGCACGAGTATCGCTTGGAGA  
CCAACGAATACGGAGCTCCCCAAGTAAGTTTGTGTACTAGTGCATGCATGCTACCGAGGA  
TTCAGACTTCAGACACCTAACATGCTCCATGTTTCAGGAGGAAGGATGGGTGGTCTGCAGG  
GTGTTCAAGAAGCGAGTCGCGGCGGTGCAAAGGGCGGCCGCGACGGCGGCGACTCACCT  
TTCTGGTTCAACGAGCACGTCGCGTTTCATGGCGCCGGCGCCAGGCCTCGACTCGCCGTAC  
CATGGCCACCGCCAGAGCCACCCTTGCAAGCTGGAGGTAGAGTATCACCACCACCTCCTT  
CCTCAGGAGGCGGCGCGTTTCATGCACCTCCCAAGGCTGGAGAGCCCCAAGCTACCGGCC  
GCCGACATCATTGTGCGCCACCGCAGCGTCGTCCGCTCTCCAGCCGTGCGGCCACACGACG  
GCGCAGCAGCTGCAGCTGCAGATCGAGCCGGTCTACGTGACGGCCGATGCGTCGGCAGCA  
GATTGGAGGGATCTTGACAAGCTGGTGGCGTCTCAGTTTCGGCCACGGCGACTCGACTGCG  
AAGGAGCCCAGTTACTGCAATCCGGTGCAGGTGTTTCAGGTCGAGGGGAAGCAGGAGGAT  
AGCTTGATTACGTGTCCACGTCCTCCTGCGGAGGGGAGGAGGATTTGTGGAATAG  
CCGCGTGAATGATGCAAAACACATACTAACATATACGCCATTGTATACAGCCTAATAACA  
TTGCGGTGTGATTTGATACAGTGTATAAATAGCTAGCATTGTCATGGTAATTACCAACTG  
CCCATCTATATATACTAATAAAAGTATAACCGAAGTGGTTATACATGCATGCATGATTAAT

TAATTTGCCATC

CDS

> **ONAC082**

ATGCTCCATGTTTCAGGAGGAAGGATGGGTGGTCTGCAGGGTGTCAAGAAGCGAGTCGCG  
GCGGTGCAAAGGGCGGCCGCGACGGCGGCGACTCACCTTTCTGGTTCAACGAGCACGTC  
GCGTTCATGGCGCCGGCGCCAGGCCTCGACTCGCCGTACCATGGCCACCGCCAGAGCCAC  
CCTTGCAAGCTGGAGGTAGAGTATCACCACCACCTCCTTCCTCAGGAGGCGGCGCCGTTT  
ATGCACCTCCCAAGGCTGGAGAGCCCCAAGCTACCGGCCGCGGACATCATTGTCGCCACC  
GCAGCGTCGTCCGCTCTCCAGCCGTGCGGCCACACGACGGCGCAGCAGCTGCAGCTGCAG  
ATCGAGCCGGTCTACGTGACGGCCGATGCGTCGGCAGCAGATTGGAGGGATCTTGACAAG  
CTGGTGGCGTCTCAGTTCGGCCACGGCGACTCGACTGCGAAGGAGCCCAGTTACTGCAAT  
CCGGTGCAAGTGTTCAGGTGAGGGGAAGCAGGAGGATAGCTTGGATTACGTGTCCACG  
TCTGCCTCCTGCGGAGGGGAGGAGGATTTGTGAAATAG

Protein

> **ONAC082**

MLHVQEEGWVVCRVFKKRVAHVQRAAGDGGDSPFWFNEHVAFMAPAPGLDSPYHGHRQSH  
PCKLEVEYHHHLLPQEAAPFMHLPRLESPKLPAAADIIVATAASSALQPCGHTTAQQLQLQ  
IEPVYVTADASAADWRDLKLVASQFGHGDSTAKEPSYCNPVQVFQVEGKQEDSLDYVST  
SASCGGEEDLWK\*

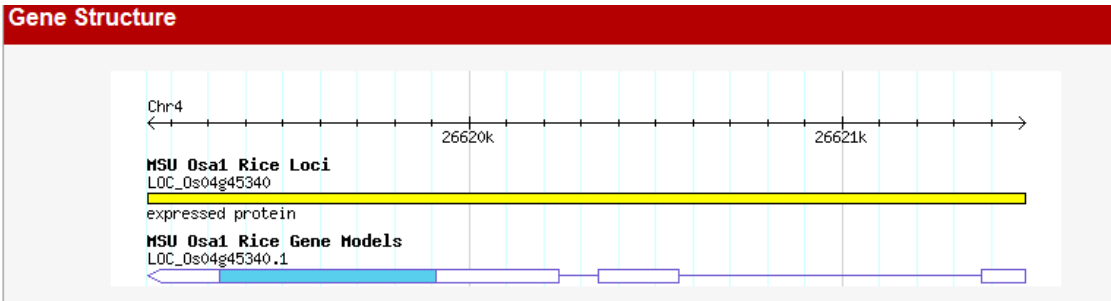

**LOC\_Os04g52810 (ONAC083) sequence information**

**Genomic sequence length:** 3803 nucleotides

**CDS length:** 852 nucleotides

**Protein length:** 283 amino acids

**Putative Function:** no apical meristem protein, putative, expressed

Genomic Sequence

> **ONAC083**

TGTCTTTCTCAAGGGAGAATTAACCATCAAATCAATATATACAATGAGCTTGATCAGCAT  
GATGGAGGCGAACCTGCCGCCGGGGTTCCGGTTCCACCCCAGGGACGAGGAGCTCGTCGT  
GGACTACCTCTACCACAAGCTCTCCGGCGGCGCGAGTTCTACGGCGGCGTGGCCATGGT  
CGACGTCGACCTCAACAAGTGCGAGCCGTGGGAGCTTCCAGGTACGGATCAGATCATCTC

GTGCAAAACTTCAGCTTAATTTTCTTTTCGGAAAGGTGATGGCAGATGCGTATATTGATTA  
 GCTCCGAGCAGCACGAACTGTGTGTGATTAATTAGCTTTGCACCCTCTGCACCGATCCAA  
 TGGTACATGCATAATTGCATAGCAGTCGCATAACCTGAAGAAAGAACTGTGTGATTATTT  
 AACATCTGCAGCTTGCACCCATCCATCTGCAATATCTGATTTTCTTTTTTCAGAAAGGCT  
 ATACAGAACATCCGCAGCCTGCACAATTCAGAAAATGTTTTTTTTTAAAAAAGGATATT  
 CAGAACATATGCAGCTTTGACGAATTCAGGCCAAAAAAAAGACTCAGAAAATGAAGGAA  
 AGAAAAAAGAGAAAAATGGCGTCGCCCCGACTCGAACCGGAGACCTTCAGTGTGTT  
 AGACTGACGTGATAACCAACTACACCACGACACCTTTGTGTTACCGAAATTTAGACTAAA  
 TTATATATTTTTGAGAAATCATCTTGCACGAATTACTATGAGCACCAGCTGCATCTCTGT  
 AGATCTCGTTTCGATTTTCCCTTTAATTTTGAAACAAGTTCCATTTGCACATTTCTTCACG  
 TCACTAGTTGCACTTGACCTATCTGAACTATATGGTTTTTTTTTACTTGCCATGAATCGTT  
 AGCATATTTCTTGCACAATCTGATCATCTTCCCTGCACGCGCACGCGCACGCGCCGCCGG  
 TCGCCGGCGACGAGAAGACGCCGCGCGGGTGGGCGCCACGGAGTGGTACTTCTTCAGCCT  
 GCACGACCGCAAGTACGCCACGGGGCAGCGCACCAACCGCGCCACCCGCTCCGGCTACTG  
 GAAGGCCACCGGCAAGGACCGCGCCATCGTCACCCGCCGCGCGCCGCCGCCGGAGAGGC  
 CGTCGCCGGCGGCGAGGTGGTTCGGGATGAGGAAGACGCTGGTGTCTACCAAGGGAGAGC  
 CCCCCGGGGCAGCAAGACGGAGTGGGTCATGCACGAGTTCCGCGTGGACGGACATGCCGT  
 TGCCGACCACCCCTCCTCGTCCACCTCCTCCTCATCTAATCTTCTCAAGGTACTACA  
 TGCCAGCATTTGTTTTGCGTGATCTCAGCAGTAATTATTAGTGATTAATCTATCATCAG  
 CAGGTAAAAAGAGTGAAAAAAGAGAGAGAGAGAAAAGATGAGAAGTACTCACTCTATTCCAA  
 AATATAAGACACAACCTACCCTTAACTCAAAGATCAAGAAATAATTAATATATCATTATCG  
 TTGTCATAAATCACTCTAATTAATAACAAGAGATGCAACCAATAGAATTAAAGATCTTGTG  
 AGTATAGGATTTAAAAATAATAAATACTTAGGGGAGAGAATGTGATAATTAATTACATGCG  
 TCGGTGCACGTCTTATATTATGAACTACTTTAAAAAATAGATGTGCCTATATTTTAGAA  
 TGGATGGAGTAAATAATTACTCCCTCTAGTTAGAAAATATTTTGTGTTTGGGGCGAGATTT  
 ATTTAGTTGAAATTTTGAATTCTGATAATCAGTTCTCAAGCAAAATAAGTTTATGAAATC  
 TAATAAATTCATACCACAGTACCTCCGTATTTAAATATAAGTATTTTTTACTTTGAATCT  
 GGATAGATAAAAAATGCTTATATTCTAATTCAGAGGTAGCTGTATTCCTTTTGACACATC  
 TACACACGCCAATGTTTTCTTTTAAAACTAGTATTTTAGAAAATTACGAATGGTTAAAATT  
 TCAAAAGTTGATTAGATATTGTCTTATGCATCAAATATTTATGATTCTAATGCCTAGATT  
 AATTACGTACTGAGAAAAACTTATATAAAAGTGGTACTAGGAAGCTTCGTCAGTGTTAG  
 AAGAGTTCTACTCTTGTAATGCCACGATTGCACGTCTCTTGGTAAGTGACAGCCAGAA  
 TTAGGATAGTAGTAGCAACATGTTTCTTTCACAGTTTTGTTTTCTTTGGCTCTACAGACT  
 TTAGCCGAATGCTGTTTTTTTTTCCCTTTTCTGAACATTCTGATGTGATAAACTAGTTAT  
 GCAACTTGCCAATGATTGTTTCTACTTGACCTAGTCCCATCCAATCATTCCCAAACCTTG  
 TACGTATACCAATGCTTGCCACTCGAGGTTTGTTCGATTGGCTACATCGCTGTGCATCA  
 TCAGCAACACTAAATTACAAGCCTAGATATGTAGGGGAACAATTTGAAAAGGATTTGACT  
 GCTTTTATAGCACAGATTCTTTATTCCAAGTTGTTAGTTGTTCTGTAAATGATGATTTA  
 AGGCCCTATTTAGATGGGACTAAAACTTTAAGTCCCTATCACATCGGATGTTTGAAT  
 TAATTATAAATATTAACGTAGACTATTAATAAAACCCATCCATAATCTTGGACTAATTT  
 GTGAGACGAATCTAATGAGCCTAATTAATCCATGATTAGCCTATGTGATGCTACAGTAAA  
 CATCTCTAATATAGATTAATTAGGCTTAAAAAATTTGTCTCGTGAATTAGCTTTTATT  
 TATGTAATTAGTTTTGTAAGTAGTCTATATTTAATACTCTAAATTAGTGTCTAAAGACAG  
 GGAATAAGTTAAGTCCCTGAATCTAAATACCACCTAAGCATATTCAGATTATTGAGGTT  
 TCCACAATATCAAGCATCGTACGAACTGTATATATATCTATCTATCTTTACAAGATAATA



TAAACTTCATCCCAACCTGAGGTCACCAAATCTTATTTTAAACACGAATGGTAAGTTAAG  
TACAACTTAATCTACTTTGTCTGAATATTTCTTTTGACAAAAAAAAAATGCAGGAGGACT  
GGGTGCTGTGCAGGGTGTCTACAAGAGCAGAACGGCTACACCAAGGGCAGTAGTCTCCG  
GTGAGGCTGCCGTGTCACTGTCCGGTGAGCTCAGCTTGCCGCCGCCGCTGCCGCCGCCG  
TTGCCCCCGCCGTCGTCGACGGCTACACCGGCGGCGGCTATTACGAGCAAGACAGCTCAG  
CTGGGTACCACCACCACCACCACCACCGGCCGCCGCCGTCGGCAGCATTGCCGTTCAAGG  
ACCTGACGGACTTCAGGGACCTGCTGAGCAACATGGCACAAGGCGGCGGCGGCGGCGCTG  
CCGCCGCCAAGACGGAGGGGTTCCATCTTGGCTGGAGCGAGGAGGAGTCCCTCCGGCTACG  
TGCAGCAGAGCGCCATGGCGTCGACGGCGTGGAACCCGTTCTAGCTTAGCTAGAGCTAGA  
GCTAGAGCTATATATAGCTGATATAAGCTGATCCAGTTCTGAACTTTTTTCAGAAATGGT  
GATGATATACAAAGGCAAGTTTGTAGGTGTAGCTTAGACAATGTAAATGTAATTTATCT  
TCGTTGTTTTCAGTAATTTTCCCTTTGTAAATTAGCGTGGTTGAATCCTAGTTGTGCTACTG  
CTAGTTAACAGCGTAGTGACAAACAATTTGTAAATGTGGAGATGGTTTGGTTTACAGTAA  
CTTTTGAGATGTACAAAGGATTGCTCCATTCAGTTCATTGGTTGCTAAAGAAGAGAAATA  
GATTCGATCGTTACTCATCTTCC

#### CDS

##### > **ONAC083**

ATGGTTTTTTTTACTTGCCATGAATCGTTAGCATATTTCTTGCACAATCTGATCATCTTC  
CCTGCACGCGCACGCGCACGCGCCCGCGGTGCGCCGGCGACGAGAAGACGCCGCGCGGGTG  
GGCGCCACGGAGTGGTACTTCTTCAGCCTGCACGACCGCAAGTACGCCACGGGGCAGCGC  
ACCAACCGCGCCACCCGCTCCGGCTACTGGAAGGCCACCGGCAAGGACCGCGCCATCGTC  
ACCCGCCGCCGCGCCGCCCGGAGAGGCCGTCGCCGGCGGCGAGGTGGTCGGGATGAGG  
AAGACGCTGGTGTCTACCAAGGGAGAGCCCCCGGGCAGCAAGACGGAGTGGGTCATG  
CACGAGTTCGCGTGGACGGACATGCCGTTGCCGACCACCCCTCCTCGTCCACCTCCTCC  
TCCTCATCTAATCTTCTCAAGGAGGACTGGGTGCTGTGCAGGGTGTCTACAAGAGCAGA  
ACGGCTACACCAAGGGCAGTAGTCTCCGGTGAGGCTGCCGTGTCACTGTCCGGTGAGCTC  
AGCTTGCCGCCGCCGCTGCCGCCGCCGTTGCCCCCGCGTCGTCGACGGCTACACCGGC  
GGCGGCTATTACGAGCAAGACAGCTCAGCTGGGTACCACCACCACCACCACCACCGGCCG  
CCGCCGTCGGCAGCATTGCCGTTCAAGGACCTGACGGACTTCAGGGACCTGCTGAGCAAC  
ATGGCACAAGGCGGCGGCGGCGGCTGCCGCCCAAGACGGAGGGGTTCCATCTTGGC  
TGGAGCGAGGAGGAGTCCCTCCGGCTACGTGCAGCAGAGCGCCATGGCGTCGACGGCGTGG  
AACCCGTTCTAG

#### Protein

##### > **ONAC083**

MVFFTCHESLAYFLHNLIIFPARARARAAGRRRRREDAARVGATEWYFFSLHDKYATGQR  
TNRATRSGYWKATGKDRAIVTRRRAAAGEAVAGGEVVGMRKTLVfyQGRAPRGSKTEWVM  
HEFRVDGHAVADHPSSSTSSSSSNLLKEDWVLCRVFYKSRTATPRAVVSGEAAVSLSGEL  
SLPPPLPPPVAPAVVDGYTGGGYEQDSSAGYHHHHHRPPPSAALPFKDLTDFRDLLSN  
MAQGGGGGAAAAKTEGFHLGWSEEESSGYVQQSAMASQAWNPF\*

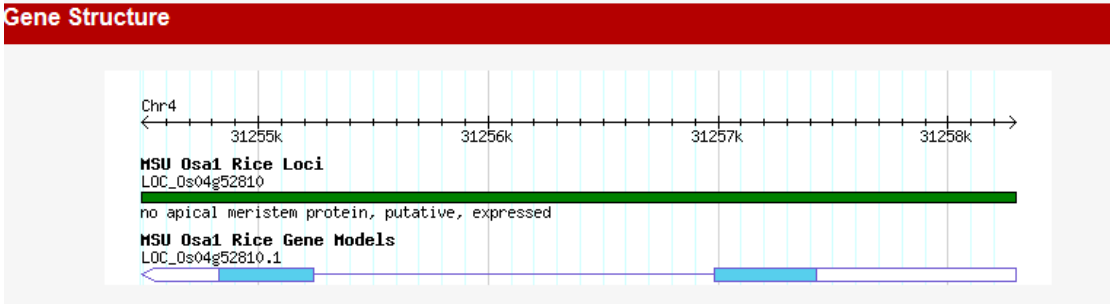

**LOC\_Os04g59470 (ONAC084) sequence information**

**Genomic sequence length:** 858 nucleotides

**CDS length:** 858 nucleotides

**Protein length:** 285 amino acids

**Genomic Sequence**

**> ONAC084**

ATGGAGGAGGAGTGGTGTGTGTGGCGCCGGGATTTCAGGTTCCACCCGACGGAGGAGGAA  
CTGGTTGGTTACTACCTGGCACGGAAGGTGGTCGGGCAGCAGGACGACGGGATCATCCAG  
GAGGTGGATCTTAACAGCATCGAGCCATGGGACCTGCTGCAAGCTCAGCAGCATGATCAG  
GAGTACTACTGCTACTTCTTCAGCTACAAGGACCGCAAGTACCCAGCGCGCGAGGGACG  
GGGACGCGGACCAACCGCGCCACGGCGGCGGGCTTCTGGAAGGCCACGGGCCGTGACAAG  
CCGGTGCTCTCCTCCTCTCGATCATCATCGTCGCCGGCGGTGATCGGCATGAGGAAGACG  
CTCGTCTTCTACCGCGGCCGCGCGCCCAACGGCTGCAAGACCGACTGGATCATCCACGAG  
TACCGCCTCGTCGCCACCATCAGCAGCCGGACGGCAGCTGCTGGGTGGTGTGCCGCGCG  
TTTCAAGGCCACCAACCACCACCCTGCAGCATCAGCTTCACCTGCACAGGCCGGCTCCT  
CTACTTCATCATCCCGGCTACTACGACGACCAATATTTATATCCTCCTCCTGCTGCTGCT  
GCTGGTGGCGGCGGCTTGCTCTGCTCCCCTGCCTTGGACATGGAGTTGGAGGACGAGGAG  
GATGAATCCAAGATGATGATCTTAAGCAATGATAATATTCGCTGGTGGTGAGTCCGACT  
GCCGTACACACACAAGGCACCGCGGCGGACATTATTAACGACGCTACTACCGCGCCTGCT  
GCTGCTGCTGCTGCTGATCATCGTCGACACCTTGCTCCACCACCACCACTTCACTTGTTA  
GCTAATTCAGTCGATTAA

**CDS**

**> ONAC084**

ATGGAGGAGGAGTGGTGTGTGTGTGGCGCCGGGATTTCAGGTTCCACCCGACGGAGGAGGAA  
CTGGTTGGTTACTACCTGGCACGGAAGGTGGTCGGGCAGCAGGACGACGGGATCATCCAG  
GAGGTGGATCTTAACAGCATCGAGCCATGGGACCTGCTGCAAGCTCAGCAGCATGATCAG  
GAGTACTACTGCTACTTCTTCAGCTACAAGGACCGCAAGTACCCAGCGCGCGAGGGACG  
GGGACGCGGACCAACCGCGCCACGGCGGCGGGCTTCTGGAAGGCCACGGGCCGTGACAAG  
CCGGTGCTCTCCTCCTCTCGATCATCATCGTCGCCGGCGGTGATCGGCATGAGGAAGACG  
CTCGTCTTCTACCGCGGCCGCGCGCCCAACGGCTGCAAGACCGACTGGATCATCCACGAG  
TACCGCCTCGTCGCCACCATCAGCAGCCGGACGGCAGCTGCTGGGTGGTGTGCCGCGCG  
TTTCAAGGCCACCAACCACCACCCTGCAGCATCAGCTTCACCTGCACAGGCCGGCTCCT

CTACTTCATCATCCCGGCTACTACGACGACCAATATTTATATCCTCCTCCTGCTGCTGCT  
 GCTGGTGGCGGCGGCTTGCTCTGCTCCCCTGCCTTGGACATGGAGTTGGAGGACGAGGAG  
 GATGAATCCAAGATGATGATCTTAAGCAATGATAATATCCGCTGGTGGTGAGTCCGACT  
 GCCGTACACACACAAGGCACCGGCGGCGACATTATTAACGACGCTACTACCGCGCCTGCT  
 GCTGCTGCTGCTGCTGATCATCGTCGACACCTTGCTCCACCACCACCACTTCACTTGTTA  
 GCTAATTCAGTCGATTAA

Protein

> **ONAC084**

MEEEWCCVAPGFRFHPTEELVGYYLARKVVGQQDDGI IQEVDLNSIEPWDLLQAQQHDQ  
 EYYCYFFSYKDRKYPARGTGTRTNRATAAGFWKATGRDKPVLSSSRSSSSPAVIGMRKT  
 LVFYRGRAPNGCKTDWI IHEYRLVAHHQQPDGSCWVVCRAFHKPTTTTLQHQLHLHRPAP  
 LLHHPGYDDQYLPPPAAGGGGLLCSPALDMELEDEEDESMMILSNDNIPLVVSPT  
 AVHTQGTGGDI INDATTAPAAAAAADHRRHLAPPPPLHLLANSVD\*

**Gene Structure**

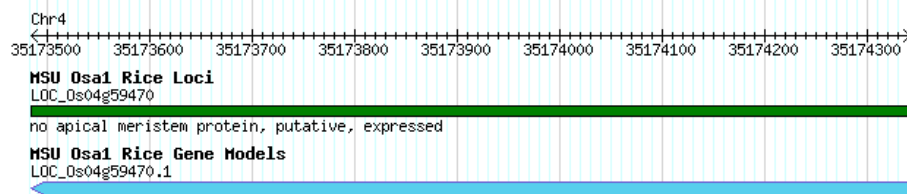

**LOC\_Os05g10620 (ONAC085) sequence information**

**Genomic sequence length:** 5420 nucleotides

**CDS length:** 1074 nucleotides

**Protein length:** 357 amino acids

Genomic Sequence

> **ONAC085**

TTGTGCCACACCCTTCAAAAAGTGCTCTCTCTCAAATTTAACTCCCTCCCAATTTCTTC  
 TCCATCTCTTTAGATCTCTCCCCTCTTCGATCAAATTAAGCCTCTCAGTCTCATCAGATC  
 GAGCTCAACCAAGGTTGGTTTATTGGTTTGGTTATTAGTTGGCCATCGATGATTAGTTTC  
 AGTTCCCCTTCTCTCCTGCTGCTTGCTGTGATTAATTAATTTGCTTCATCCACGTCTTGA  
 TCGATGTGTAATGTCCGTGCTGCCATAGTGCCATGCCATGTCTCTTGATGTGTGTGTGT  
 GTGTGTGTTTGAATCGCATTTTGAATTTCAATTTGCGCGCCTTTTAATCCCTCCCAGATCT  
 TGCTGATAAGAAGCGGTTTTTCTTTTCGTTCTTTTTTTTATTTTTTTTCTGATCGTTGCA  
 TGCTCTCTCCGTATAAAAAAAGAATTGAGGATACGACACAACCTAGTGTGTCCAAATTC  
 GTTATGTTAAGTTGTATCTCTTCCTTAATTTAGGTATTTCTTAGATAGAGGGAGTAGATT  
 GTACTCTCTGTATAAAAAAGCCAAGTTAGGAGGGGATGCGATCCCTTCTAATATAATGAAT  
 TTGGATAGTTTTATGACTCTTTTGGGTTTTTTTTTGACGGAGGCAGTAGTAGTTTATAAA  
 GTTTAAGGTCCTTATTTTTTTCTTATACTTGCTTATAATTTAAATTTTTGACTTTAAATT  
 TGGGATTAATTTTAGGGTGTTTTTCATCGAAGTTTATTTTCCAGTCTTTACTTTTAGATCG  
 CTAACAAACACGTATAGAAAAATTTTCATTTATAAATTATTTTTCGTTTGTAATATGCCAT

TTCTGGGTCCGTAATTCTTCGATAAAATAAATGTTGCTTTCTTGCGAAGCAATAAATCTTT  
 TGTACTGTAACGCACGCTAGCGGCCAGTTCGGAATTTAGGCAGTGAACAGGTCCATTAGT  
 CACGAATTTTTAGCATATGTTTAAAGTTTGTTAACTGAATTCGAACCATTTTTTACACTCCA  
 TAACATTATAAAATTTAATTTTCGATTTAGTACCATAGAGGTGATTGTCAGAGAGAGAGAG  
 AGATACATGAGATGGAGCGCATCTGCGCATGCACCTGAGCCATAGGGATGCAGGTGGGCC  
 AGGGTTCAAAATTAACCTTTGATTTGGCCCTCTCTTTTGGGGCACGAAGATAATTTGAAA  
 TTTGAACAACTTTGGTCAATTTTTTTTTCTAAAAAAAATGCTAAACATTTACAAAAGAT  
 GAAAAGATTCTGAAATTTTCATTCCAAAAATTTCAACCCCTTAAGTGGGCCAGTCCACTATA  
 CCTGATGACCTGCTGACGGTTTCCCTTAACCTCGTGAGTTGCACGAATTAATTGAATTCGG  
 CCTCTCTGGTGTATATAAATGGATCCAAGCAATAATCAACCTGATTTATCATTTACAT  
 TTTTACTACTAACTAATACACGATCCACGTATATGAATGGGCGCAGGGTCGATCCAAGCA  
 AGAATGAGCAGCGACGGCGCCTCTGGAAGCATTGGAATGAAGCACGACGACGGCGATCAC  
 CGGCCGAGCACCGGAGCGTCGTCGCGCGGTGCCCCAGCTGCGGCCACGACCCTGACTGC  
 AACAAGCCGGTAGGTGCACGCATGCATTGCTACAATCAATTAACCAACATGAGGCTTGTG  
 ATTGTTTGTCTTGATTACTGCAATAATGGATTTCGATCGACCTCTCTTCGATCTGATGTT  
 AGTTAATTAGTTAATTACTGTATCAAATGCATTTTGCAGTTCGACATGGTTGGGATGCCT  
 GCCGGCGTCAGGTTTCGATCCGACGGACCAGGAGCTGATTGAGCACCTGGAGGCCAAGGTG  
 AAGGATGGCGGTCAACATCGCACCCCTCTCATCGATGAGTTCATACACACCATTCAAGGA  
 GAAGATGGCATCTGCTACACACATCCTGAGAACCTGCCCGGTTTGTGAAATCTCGATCAC  
 ATATATCATTTTGGTGTGCTGCGTGTTTAATTTTGTTCCTTAAGATGGCAAAGTCAACT  
 TGAATTTGACTTTATAATGGAAGCTGCATGGTAGCCTGGTTGGATAGCTGTAAAAATGTT  
 ATGTCGGCATGGAGTAATCCAAATGTAAATTTACTTGCTAGATATATGTGTTTAGATCAC  
 AGCTATATGGAGTATGTCGGTATGGTAGGAGAAGTCAAAAGAAAGTTGATTAGTTCGATT  
 CAGTGTACTTCATAACTTAGCTAGTGAGAGAACTTTTGATATTATGTAACTATTAAT  
 GAGCTGTATTGTGAATGTCGGTTTGTGATTTAGTCGGTTAGCATTAGGCTCTAAATATGA  
 ATGTAAAGGTAACCTTATCGACCAGATTAATTAAGATAGTACTATATTTTCCAGCTCC  
 AGTGTTATTTGCATGTGTGAATTCTCTCCTAGGATATAGCCAACCAGCATAGTGATACAA  
 CATTTATATATTGTCGAATTGAAAACCTTTTCCTAACTATTTAGATTGCATGCATTTACT  
 AAACAAGGCACGCCAACTTATGTTGATAAATTTCCCTTTCAAGATTGTTGTGCATAGAGA  
 TACCAACTGCCTATATAGGCCTTGGCTGTGCATAGAGATACCAACTGCCTATATATGCAA  
 GATTGTTGTCCCTGAATATTTTTAGTTTTTGTTTTAAATCACCTATCTCTCATCATGGTG  
 GGAATTTGGTCCCTCTAAAAATTTCCAAATGTTAGTAAGGCTTCACTCTTTAATTTCCCT  
 GATCAGATGAACTGCCACTCATCATTCTAATACATGAATCTCGACGTACTCCAAACAGAG  
 CAAATATAGTAGCTGGCGTTGACACCACCAAATTTACAAAATCATGACTATAGTTAATGC  
 GGCCATGTAAACATGTCGTTTCAGACTTGTTTCAAGCCCACTTCAAAAACCTTTGCACAG  
 CATTGGATTGGATATATGAAGAGAACACATATGTATATAATATATATTAACATTGAAAAG  
 TATATCGTCATGAAAAGTGTTCTTTTCTCATGAAGATGTAGATGAAGATAAAGATTAAGT  
 TTTTTTTACGTAAAACGAGGTGGTATTAACGTATGATTGATTAAGTTTTAATTATTATAA  
 ACTTGAAAAATAGATTAATATGATATTTTAGAGAACTTTTATTTAGAAAAGTTTTCGTAC  
 AAAACACACCGTTTAGCAGTTTAAAAAGCGTGCTACGAAAATCTTAATCTTCATCCAAC  
 CTTATTGGAGAAAAAGAACGGGTGGTCTAGCTATAATTCGCAGGGTTTTCCGAATGTTCTA  
 GCTACCATTGAAACTAGTGATCAAACTACATATCGAAGGCTTTGTGCATGTCTAAAACA  
 ATAGTATATTATGTTTTGTGACTGGAGTACTGGAGTAACTTGATCTGTGATCACCAAA  
 AACAGGTGTGACAAGGGATGGCCTGAGCAAGCACTTCTTCCACCGGTCAGCCAAGGCCTA  
 CCCCCTGGCACAAGGAAGCGGAGGAAGGTCCCTGGCTGATCAGCAGCCTGACGACCATCC

ACAGGCCAGCAAGGGCAGAAATGTCGCGGCGGCGGAGACACGGTGGCACAAGACCGGCAA  
 GACGCGGGAGATCACGGTGCGCGGCCAGCCCAAGGGCTGCAAGAAGATCCTGGTGCTCTA  
 CACCAGCTTCGGCAAGAAGCGCAAGGCGGAGAAGACCAGCTGGGTGATGCACCAGTACCA  
 CCTCGGCGAGCTGGACGACGAGAAGGAAGGGGAGCTCATCCTCTCCAAGGTCTTCTACCA  
 GACGCAGACGCGGAGCGCCGCCGAGCAGAGGCACCGGTAAGCTCGGGTGCTGCCATGGA  
 GGTGCAGGGACAGCAGCAGCAAGTGCTGAAGCTGCAGGCTGATGATGGTCACTTCAGCTC  
 AGCTCCTACCAAGAAGAGACTGCATCAGGTAAGTCTAGCTACTGTTTTATCTGTCAAGAGT  
 TGAATTTGGCTGTGTTTAGTTTCACTGAAGTTTGGAAAGTTTGGTTGAAATTGGAACGAT  
 GTGACTGAAAAGTTGTGTGTATGAAAGATTGATGTGATGGAAAGTTGGAAGTTTGGAAA  
 AAAACTTTAGAACTAAACAGGGCCTCTGTTGTATTATTAGTTTGAAGCTGGTACC  
 TCTCCAATACTACAGTCTTAGTCCACAAATTAATGCTGAAAATCTTTGTACATCCCCAAG  
 AACTGTAAATTTATTCTCATGAATTAAGTTCATCACACATGATACTGCAGGATGTTGTAG  
 CACAAGTAAAAGTTGATCGGGGTCACCACTGCATGCCAGCACAACGCCAAGTCAACTTCA  
 ATTTGAAAGTAACTCCTGTGCCCACCACCAGTTCATTCCCTGTCGTTGTCGACAAACAGT  
 TGTATTCTCCTGTGGCGCTATTCCGAAGTGAACATCTTCATGTAGGTAATTCAGTTCATA  
 TGTTTCCTCGTTTACTGAAATTGAACATCTTTGTATTTGAAACTAACTCCTCAATTCCTG  
 GCCTAATGGCCTTTGGTCCCTAAAAAAAACCTACTCCTGAAAAGATTTCTTTTCTGATAC  
 TAAAGTAAATAATGTGTTAAATTGCTGTTACATTGCCATTCCCTGCATATATATTACTAT  
 AAATGAAATGCTTTGAGATCAGATTTCCCTCCGATAGTTCAATTGCTGTTGACTTCTGTT  
 TCCAAGTTCTTCACCTATATATCTTGAAAAGTTACCTGAACTTTTTAGGCAGCTTCTAGT  
 TAGAACTTGAGTACATCAATGCTCTGTTTACTTTGTTTTTGTCTGCTCTGTTTCCATT  
 GAAATGATGTTGTTTTACCTTTTAGGCCTTGTTTAGTTCCAACTTTTTTCTTCAAACCT  
 CCAACTTTTCCGTTACATCAAACCTTTTCTACACATACAACTTTTAACTTTTCCGTCACA  
 TCATTCTAATTTCTTCAAACCTTCTAATTTTGGCGTGGAATAAATACAGCCTTAATCAGT  
 TCAACATTACGACACTTCCATTTTACAAATTAAACCTTTTGACTTGTTTACATTCTACAG  
 GGAAGAACTTCAATTCATCAGCCCCAAAAAGCAGATTGGCCTCACCAGCGCTGGCCTCCT  
 GACAACCAAGATCAACATGGATAACTTCCTGGATTACAGTAGATGAACTTAACTGGTAA  
 ATGGTTCTAGTGTTGATTTTGAAACGTACAACAGAACTGGCTGTAATATCTTCGGCTAC  
 TGCTAGAGTGCTAGTGCTAGTAACCTATCTACTTCTGTTCTTAGCCCGTAGGGCAGTATT  
 GTTTCTTATTGAGAATGACTGTCTATATACATGTACAAAATCTCTTATATTATGAAATAG  
 AGGTAATATGTAGTTTTTCTGTTTATGTTTGTAGGATACTAACATCAATAAAATCAGACA  
 TGATAGATTTCTTCATCCAC

CDS

> **ONAC085**

ATGGGCGCAGGGTCGATCCAAGCAAGAATGAGCAGCGACGGCGCCTCTGGAAGCATTGGA  
 ATGAAGCACGACGACGGCGATCACCGGCCGAGCACCAGCGTCGTCGCGGCGGTGCCCC  
 AGCTGCGGCCACGACCCTGACTGCAACAAGCCGTTGACATGGTTGGGATGCCTGCCGGC  
 GTCAGGTTTCGATCCGACGGACCAGGAGCTGATTGAGCACCTGGAGGCCAAGGTGAAGGAT  
 GGCGGCTCAACATCGCACCTCTCATCGATGAGTTCATACACACCATTCAAGGAGAAGAT  
 GGCATCTGCTACACACATCCTGAGAACCTGCCCGGTGTGACAAGGGATGGCCTGAGCAAG  
 CACTTCTTCCACCGGTGAGCCAAGGCCTACCCCACTGGCACAAGGAAGCGGAGGAAGGTC  
 CTGGCTGATCAGCAGCCTGACGACCATCCACAGGCCAGCAAGGGCAGAAATGTCGCGGCG  
 GCGGAGACACGGTGGCACAAGACCGGCAAGACGCGGGAGATCACGGTGCGCGGCCAGCCC  
 AAGGGCTGCAAGAAGATCCTGGTGCTCTACACCAGCTTCGGCAAGAAGCGCAAGGCGGAG

AAGACCAGCTGGGTGATGCACCAGTACCACCTCGGCGAGCTGGACGACGAGAAGGAAGGG  
 GAGCTCATCTCTCCAAGGTCTTCTACCAGACGCAGACGCGGAGCGCCGCCGAGCAGAG  
 GCACCGGTAAGCTCGGGTGCTGCCATGGAGGTGCAGGGACAGCAGCAGCAAGTGCTGAAG  
 CTGCAGGCTGATGATGGTCACTTCAGCTCAGCTCCTACCAAGAAGAGACTGCATCAGGAT  
 GTTGTAGCACAAGTAAAAAGTTGATCGGGGTCACCACTGCATGCCAGCACAAACGCCAAGTC  
 AACTTCAATTTGAAAGTAACTCCTGTGCCCACCACCAGTTCATTCCCTGTCGTTGTCGAC  
 AAACAGTTGTATTCTCCTGTGGCGCTATTCCGAAGTGAACATCTTCATGTAGGGAAGAAC  
 TTCAATTCATCAGCCCCAAAAAGCAGATTGGCCTCACCAGCGCTGGCCTCCTGA

#### Protein

#### > ONAC085

MGAGSIQARMSSDGASGSIGMKHDDGDHRPSTGASSRRCPSCGHDPDCNKPFDVMGMPAG  
 VRFDPTDQELIEHLEAKVKDGGSTSHPLIDEFIHTIQGEDGICYTHPENLPGVTRDGLSK  
 HFFHRSAYPTGTRKRRKVLADQQPDDHPQASKGRNVAAAE TRWHKTGKTREITVRGQP  
 KGCKKILVLYTSFGKKRKAEKTSWVMHQYHLGELDDEKEGELILSKVFYQTQTRSAAAAE  
 APVSSGAAMEVQGGQQQVLKLQADDGHFSSAPTKKRLHQDVVAQVKVDRGHHCPAQRQV  
 NFNLKVTPVPTTSSFPVVVDKQLYSPVALFRSEHLHVGNFNSAPKSRLASPALAS\*

#### Gene Structure

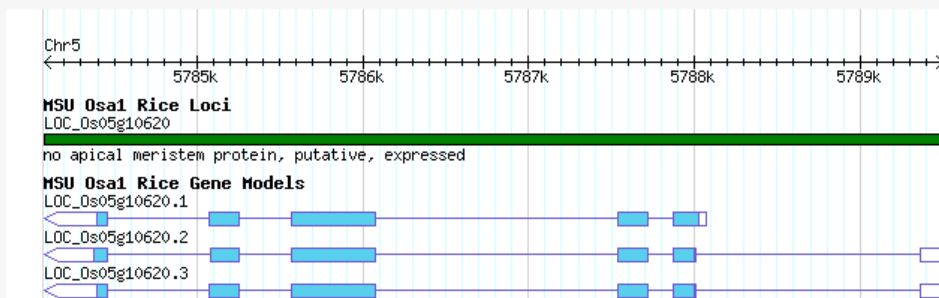

#### LOC\_Os05g25960 (ONAC086) sequence information

**Genomic sequence length:** 1704 nucleotides

**CDS length:** 1704 nucleotides

**Protein length:** 567 amino acids

Genomic Sequence

#### > ONAC086

ATGGCGGCGGCGGATGGGCTCCTCCCGGGCCTCAAGTTCGATCCCAGCGACCACGACCTC  
 GTCGGAAGGTACCTGCTCCGGCGCCTCCAGGGCCAGCCCCCTCCCGCTCGACGGCGTCATC  
 CTCGAGGCGGATCCCCCTGAGCGCGCCCGCTGGAAGCTTCTCGCGGATCACGGCCGCGGC  
 GACGAGGCCTTCTTCTTCGCGGAGGCGCATGCCAAGAATGGGAAGGGGAAGCGGCAGAAG  
 CGCACC GTGAGGGCGGCGGATTCTGGCAGGGGCAGAACACGTGCGTCGACGGCGAGAGG  
 CTTTGCGTCCCCGACGACGGCGACGGCAGCGGCGGGCGGGCGGGCGGCTTGAGATCGCG  
 TGGCGCAAGTACGTGCTCAGCTTCTTCGCGAACGGAGAGAGGGGCAGTTCGGGATGGGTG  
 ATGCACGAGTACGCGGTGACGGCGCCGGATGGCCTCGCCTCGTCCCAATTGCGGCTGTAT  
 CGCGTCCGATTCAGCGGCTACGGCAAGAAGCGCAAGAGGGAGCCCCAATGTCCGGGAGCC

CACGGCGACGACGACGGCGAGCTACAATGCGCGCCGCCCCGCGCTCCATGGCGGAGACG  
 GCTCTGCTCGAGGAGCGTGGGCCACTGCCCCATCCCGTTCTTGGCCCTGCATCGGTGGTG  
 GATCAGTGACCCGATCAGGGCTCATCCGGCGTGATCGACGATTCTTCGCTGGTGTTTCGT  
 GATCTTCCCGACCTGATTGACCTGCCAGTTGCGGAGGAAGCAGATGCCAGCCATGGTGCA  
 GAGACTGCTCTGCTCAACGAGCACCTGCCGCTGCCGCCGCCACAGTTGTTTCGTTCCCCCT  
 ACTGCAGTGCCGCTGGACCTCGCCGATGACTCTAATGGCGCCGATCAGAACTCCTATGGC  
 ATGATGGGCGACGATCAGCTGCTGCTTCCTGACCTTCCCGGGACAATCAATGACGACATG  
 CCAGACCTGTTTCGTCTCCCAAGCAGAGGAAGCCAGTGCAAGTGCCCGCGATCAGTACCAC  
 TCGTCGGGCTTCATGGGCAACGAGGTTGCGGCATTGTCTGATTTTGAGTTGCCGGAGAGC  
 TATTCCTCATCTGATGCCATGGACGGCGAGGCGCTGGCATTGTCTGAATTACGAGTTTCCA  
 GAGAGCTTCGAGGAGGATCTGAGCTGCATCGACTTCGCCACTGCCAACGCGAGCAGCCTC  
 GGCTTCCCAATGGACGGATACCCCATGGACGAGCTGTTTCGATGATATGCCTGACCAGGGC  
 TCTTCCGGCGCGATGGACGATTTCATCGGTGGTGTTCGCTGATCTTCCCGGCCTGATCAAC  
 CTGCCAGCCGAGAGGAAGCAGATGCCATCGGCGATGCAGAGACTGCTCTGCTCAGGGAT  
 CTCGCCGATGACTCTAATGGCACCGATCGAACTCCTATGGCGTGATGGGCGACGATCAG  
 GATCGGCTGCTGCTTCCTGAAATTCCTCGGAGAATCGACATGCCCCACTTGTTCGTCTCT  
 CAAGCAGAGGAAGCCGGTCTCGGTGGCGGTGCAGCGCTGGACTCCTCATCGGGCGCCATG  
 GACGGCGAGGCGCTGGCATTGTCCGACTTTGAGTTTCCCGAGAGCGTCGAGGAGGTGCTG  
 AGCTGCATGGACTTCAGCACGGTCGACATGAGCTTCTTGGACGTCCCCATTGACGAGCTG  
 CTAGATGATCTGCCCCGAGACTGA

CDS

> **ONAC086**

ATGGCGGCGGCGGATGGGCTCCTCCCGGGCCTCAAGTTCGATCCCAGCGACCACGACCTC  
 GTCGGAAGGTACCTGCTCCGGCGCCTCCAGGGCCAGCCCCCTCCCGCTCGACGGCGTCATC  
 CTCGAGGCGGATCCCCTGAGCGCGCCCGCGTGAAGCTTCTCGCGGATCACGGCCGCGGC  
 GACGAGGCCTTCTTCTTCGCGGAGGCGCATGCCAAGAATGGGAAGGGGAAGCGGCAGAAG  
 CGCACCGTTGAGGGCGGCGGATTCTGGCAGGGGCAGAACACGTGCGTCGACGGCGAGAGG  
 CTTTGCGTCCCCGACGACGGCGACGGCAGCGGCGGCGGCGGCGGCGGCTTGGAGATCGCG  
 TGGCGCAAGTACGTGCTCAGCTTCTTCGCGAACGGAGAGAGGGGCAGTTCGGGATGGGTG  
 ATGCACGAGTACGCGGTGACGGCGCCGGATGGCCTCGCCTCGTCCCAATTGCGGCTGTAT  
 CGCGTCCGATTACGCGGTACGGCAAGAAGCGCAAGAGGGAGCCCCAATGTCCGGGAGCC  
 CACGGCGACGACGACGGCGAGCTACAATGCGCGCCGCCCCGCGCTCCATGGCGGAGACG  
 GCTCTGCTCGAGGAGCGTGGGCCACTGCCCCATCCCGTTCTTGGCCCTGCATCGGTGGTG  
 GATCAGTGACCCGATCAGGGCTCATCCGGCGTGATCGACGATTCTTCGCTGGTGTTTCGT  
 GATCTTCCCGACCTGATTGACCTGCCAGTTGCGGAGGAAGCAGATGCCAGCCATGGTGCA  
 GAGACTGCTCTGCTCAACGAGCACCTGCCGCTGCCGCCGCCACAGTTGTTTCGTTCCCCCT  
 ACTGCAGTGCCGCTGGACCTCGCCGATGACTCTAATGGCGCCGATCAGAACTCCTATGGC  
 ATGATGGGCGACGATCAGCTGCTGCTTCCTGACCTTCCCGGGACAATCAATGACGACATG  
 CCAGACCTGTTTCGTCTCCCAAGCAGAGGAAGCCAGTGCAAGTGCCCGCGATCAGTACCAC  
 TCGTCGGGCTTCATGGGCAACGAGGTTGCGGCATTGTCTGATTTTGAGTTGCCGGAGAGC  
 TATTCCTCATCTGATGCCATGGACGGCGAGGCGCTGGCATTGTCTGAATTACGAGTTTCCA  
 GAGAGCTTCGAGGAGGATCTGAGCTGCATCGACTTCGCCACTGCCAACGCGAGCAGCCTC  
 GGCTTCCCAATGGACGGATACCCCATGGACGAGCTGTTTCGATGATATGCCTGACCAGGGC  
 TCTTCCGGCGCGATGGACGATTTCATCGGTGGTGTTCGCTGATCTTCCCGGCCTGATCAAC

CTGCCAGCCGCAGAGGAAGCAGATGCCATCGGCGATGCAGAGACTGCTCTGCTCAGGGAT  
 CTCGCCGATGACTCTAATGGCACCGATCGAACTCCTATGGCGTGATGGGCGACGATCAG  
 GATCGGCTGCTGCTTCCTGAAATTCCTCGGAGAATCGACATGCCCCACTTGTTCTGCTCT  
 CAAGCAGAGGAAGCCGGTCTCGGTGGCGGTGCAGCGCTGGACTCCTCATCGGGCGCCATG  
 GACGGCGAGGCGCTGGCATTGTCCGACTTTGAGTTTCCCGAGAGCGTCGAGGAGGTGCTG  
 AGCTGCATGGACTTCAGCACGGTCGACATGAGCTTCTTGGACGTCCCCATTGACGAGCTG  
 CTAGATGATCTGCCCCGAGACTGA

#### Protein

##### > ONAC086

MAAADGLLPGLKFDPSDHDLVGRYLLRRLQGQPLPLDGVILEADPLSAPPWKLLADHGRG  
 DEAFFFAEAAKNGKGRQKRTVEGGGFQQGQNTCVDGERLCVPDDGDGSGGGGGGLEIA  
 WRKYVLSFFANGERGSSGWMHEYAVTAPDGLASSQLRLYRVRFSGYGKKRKREPQCPGA  
 HGDDDGELQCAPPPRMAETALLEERGPLPHPVLGPASVVDQCTDQGSSGVIDDSSLVFR  
 DLPDLIDLPAVEEADASHGAETALLNEHLPLPPPQLFVPPTAVPLDLADDSNGADQNSYG  
 MMGDDQLLLPDLPGTINDDMPDLFVSQAEEASAVPAISYHSSGFMGNEVAALSDFELPES  
 YSSSDAMDGEALALSNEYFPESFEEDLSCIDFATANASSLGFPMDGYPMDELFDMPDQG  
 SSGAMDDSSVFRDLPGLINLPAAEEADAIGDAETALLRDLADDSNGTDRNSYGMGDDQ  
 DRLLLPEIPRRIDMPDLFVSQAEEAGLGGGAALDSSSGAMDGEALALSDFEFESVEEVL  
 SCMDFFSTVMSFLDVPIDELLDDLPA\*

#### Gene Structure

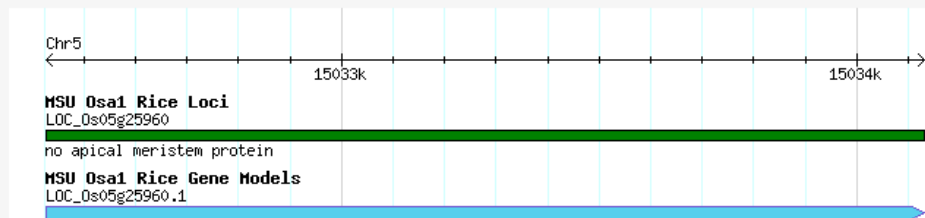

#### LOC\_Os05g34600 (ONAC087) sequence information

**Genomic sequence length:** 2694 nucleotides

**CDS length:** 1254 nucleotides

**Protein length:** 417 amino acids

#### Genomic Sequence

##### > ONAC087

CTTGCAATTTGCTCCCCCCCCAAATCTCTTCTCCTCCTGCTTTTCCAGCTATAGCTAGCTC  
 GCCGTGCTGCCGCCGCCGCCACAGCGACGCTATGCCGGTGACGACCGCGAGGGAGA  
 GGAGGAGGGAGCCATGAGCAGGGACGACGTCGACGACGTCACGGCGGGCGCCGCCGGGTC  
 AGGGGAGGAAGCGGCGGCCGATCAGGAGGAGGCGGCCGCCGCTGTCGCCGGCGACTCGCA  
 CGAGAACGACCTGGTGATGCCGGGGTTCCGGTTCCACCCGACGAGGAGGAGCTGATCGA  
 GTTCTACCTCCGGCGGAAGGTGGAGGGCCGGCGGTTCAACGTCGAGCTCATCACCTTCCT  
 CGACCTCTACCGCTTCGACCATGGGAGCTCCCCGGTACACACATCACACATAATTAAGC



TAATTAAATTAAGCTGATAATTAGTTAATTTGGTGATCGATCGATCTGTGGTTGTGCGTG  
 CGTCAGCAATGGCGGTGATAGGGGAGAAGGAGTGGTTCTTCTACGTGCCGCGGGACCGCA  
 AGTACCGGAACGGCGACCGGCCGAACCGGGTGACGGCGTCGGGGTACTGGAAGGCGACGG  
 GGGCCGACCGGATGATCCGCGGCGAGAACAGCCGCCCCATCGGCCTCAAGAAGACGCTCG  
 TCTTCTACTCCGGCAAGGCCCCCAAGGGCGTCCGCAGCAGCTGGATCATGAACGAGTACC  
 GCCTCCCCCGCCCGCCGAGACGCCGATCTTCTTCTACAAGGTAATAATTATTATTGGAA  
 CCGAGACCATTGTGGAATTTGGTTTCAGAAGAATTAATCATGTGTAGCTAGGGTTTGGGA  
 TCGAGCTCAATTTTGCAGAGAGCTAGCTAGCTCTTGTGATTGGATTCAATTATCCAGCTT  
 TGATCTCTTTTTTTTTCTTTTCAGTTTGCAAATTGAGGTGTGTCCAGCTGCTTGCTGAGT  
 GTGTGTGTGTGCCGTAAATTTAGTATTTGGTGTGTTAATCATTTGTTTATCTGCAATATC  
 TTTCGATCTGTGCGGTGCTTTTACTATGGTCGCATGATTTGTGTGAGTTCCTTTTTTCTT  
 ATCAGATCTATGAACTAGGGTTTGCTTTTTGTCCCCCTTTGGTTCTTTTTGGGCATATGT  
 ATGGACATGAGCAAAAAGCAAGAGCTATGCTATTGAAATTCTCCTAGCTAGATACCACTT  
 ACATATGCATGATTCCGTCTTGTCTGCAAAGTATATTGTTGTTCTGCATGTGCAAGCTG  
 AAAATTTTGGCTTCCCCAATTGCTAAATTATTCAGATCTGAACTTAGTTTGAAGCATTAG  
 ATTTTATAGCCCTCTTCACTTCATTTCTGCTTCTTAATTACAATCCTACTAGGCTATAG  
 TTACTACACTACAATTATCCGTGACTGCATCTTCTCTTTTCGATCTGATGCTGGTAATTT  
 CTTAAGTTTTTCTTTGGCTTTGAAATGTCCAGTGAGAAAGCTTCTGCTGACAAATTTGT  
 AGACATTGCTTAAATTACTTTGGATTAGGGGATATTTCAATATTTCAATTAACCTAATTTCT  
 TTCCTCTTAATTTGCAAGAAATTAAGCAGGCCAATGCATGAATCTCCATTATTAATTCT  
 CATCACATTGTCTCTACTCTCTACTGATGATCATGCAGTCTGAGATCTCGCTCTGCCGCG  
 TCTACAAGCGCTCCGGCATCGACGACGGCCACGGCCACCACCAGCGCCCCGCCGGCAACG  
 TGCAAGCGTCGTCGTCGTCGGCGGCGGCGAGGCCCGCGGAGCAGCACTCCGGCAACAACA  
 CTGCTGCCGGCTTACCGGCTTGCCGGCATAGGCCGTACCCGTGCTCGTCGTCGACGACGA  
 CGGCGCAGCAGCACACCAGTTTCCACCAGCTGCTCCAAGGCGAGTGCTCGGCGGCGGCGG  
 CGGCGCCGCCGCCGCCGCCGTCGCTGCCAGCATCGGCCACGACGCGCAACAGTAATGCGT  
 CACAGCTGCTGATGCCGCCGCTCCCCCAAGGCCGCGTGCGCCGCCGCTACACGTCGG  
 CGGCGGCGGCGCCGACCGAGAGCGCCGCTCCTCGCCGCCGCTCCACGTAATCGCTGC  
 TTGCCGCCGCCGCGCAGTAGCTCCACGCACATCGACGAGCTCAGCACGCTGCTCGCGGGCC  
 ACAGCCATGGCGGCGCCTACGGTAATAACCACATTGTGCGCCGGAAGCCATCATCACTTCC  
 CCTTGCCGCCGTCGCAGCTGATGCCACAGCTCGGCACGCTGCCGATCTCGCCGCCGCTGG  
 CCGCCGTCTCCGACAAGCTCTGGGATTGGAGCTCGGTCCCTGACACGTCGACGGCCAGGG  
 ATTACGATTCTTCTGGTTTTAGTGATCCCAAGTAAATTAATTAAGCAGGCCTGACAGGA  
 TGATGCAGATGCTAATCCCAATAGCCATATATATTCAGAATTTAACAGTGGCCAGTTTTC  
 TTAGCTGTTAATTCACGGTTAATTCTGAAAATTACCAGTGTGTAGGCTACATATATATAC  
 TCTTCAGCCACTCTAGAAATACCATATATGTCAAGTAGTAGTGTATATGACCAACACTTG  
 ACGATAATATATATATAGGACATTGTACTGTAAAGGATAAATTCTCAGTTCAATTAATTAT  
 CATCAGCAAACATATCTTCTATATATAGATTCCGTATGCTTAACAAATAATTAA

CDS

> **ONAC087**

ATGAGCAGGGACGACGTCGACGACGTCACGGCGGGCGCCGCCGGGTCAGGGGAGGAAGCG  
 GCGGCCGATCAGGAGGAGGCGGCCCGCTGTGCGCCGGCGACTCGCACGAGAACGACCTG  
 GTGATGCCGGGGTTCCGGTTCCACCCGACGGAGGAGGAGCTGATCGAGTTCTACCTCCGG  
 CGGAAGGTGGAGGGCGGCGGTTCAACGTCGAGCTCATCACCTTCCTCGACCTCTACCGC

TTCGACCCATGGGAGCTCCCCGCAATGGCGGTGATAGGGGAGAAGGAGTGGTTCTTCTAC  
GTGCCGCGGGACCGCAAGTACCGGAACGGCGACCGGCCGAACCGGGTGACGGCGTCGGGG  
TACTGGAAGGCGACGGGGGCCGACCGGATGATCCGCGGCGAGAACAGCCGCCCATCGGC  
CTCAAGAAGACGCTCGTCTTCTACTCCGGCAAGGCCCCCAAGGGCGTCCGCAGCAGCTGG  
ATCATGAACGAGTACCGCCTCCCCCGCCCCGCCGACGACCGGATCTTCTTACAAGTCT  
GAGATCTCGCTCTGCCGCGTCTACAAGCGCTCCGGCATCGACGACGGCCACGGCCACCAC  
CAGCGCCCCGCCGGCAACGTGCAAGCGTCGTCGTCGTCGCGCGGCGGCGAGGCCGCCGGAG  
CAGCACTCCGGCAACAACACTGCTGCCGGCTTACCGGCTTGCCGGCATAGGCCGTCACCG  
TCGTCGTCGTCGACGACGACGGCGCAGCAGCACACCAGTTTCCACCAGCTGCTCCAAGGC  
GAGTGCTCGGCGGCGGCGGCGGCGCGCGCCGCCGCGCGCTCGCTGCCAGCATCGGCCACG  
ACGCGCAACAGTAATGCGTCACAGCTGCTGATGCCGCCGCTCCCCCAAGGCCGCCGTGC  
GCCGCCGCTACACGTCGGCGGCGGCGGCGCGGCCGACCGAGAGCGCGCCGCTCCTCGCCGCC  
GCCTCCACGTA CTGCTGCTTGCCGCCGCCGCGCAGTAGCTCCACGCACATCGACGAGCTC  
AGCACGCTGCTCGCGGGCCACAGCCATGGCGGCGCCTACGGTAATAACCACATTGTCGCC  
GGAAGCCATCATCACTTCCCCCTGCCGCCGTCGCAGCTGATGCCACAGCTCGGCACGCTG  
CCGATCTCGCGCCGCTGGCCGCCGCTCCGACAAGCTCTGGGATTGGAGCTCGGTCCCT  
GACACGTCGACGGCCAGGGATTACGATTCTTCTGGTTTTAGTGATCCCAAGTAA

Protein

> **ONAC087**

MSRDDVDDVTAGAAGSGEEAAADQEEAAA AVAGDSHENDLVMPGFRFHPTEELIEFYLR  
RKVEGRRFNVELITFLDLYRFPWELPAMAVIGEKEWFFYVPRDRKYRNGDRPNRVTASG  
YWKATGADRMIRGENSRPIGLKKT LVFYSGKAPKGVRS SWIMNEYRLPPAADADLFYKS  
EISLCRVYKRS GIDDGHHQRPA GNVQASSSSAAARPPEQHSGNNTAAGLPACRHRPSP  
SSSSTTTAQQHTSFHQLLQGECSAAAAAPPPPSLPASATTRNSNASQLLMPPPPRPPC  
AAAYTSAAAAPTESA AVLAAASTYSL LAAAGSSSTHIDELSTLLAGHSHGGAYGNNHIVA  
GSHHHFPLPPSQLMPQLGTLPI SPPLAAVSDKLWDWSSVPDTSTARDYDSSGFSDPK\*

Gene Structure

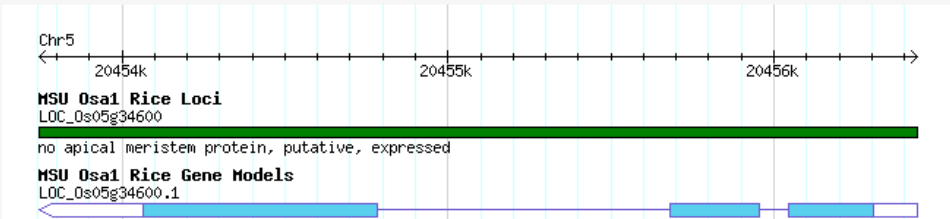

**LOC\_Os05g34830 (ONAC088) sequence information**

**Genomic sequence length:** 2343 nucleotides

**CDS length:** 969 nucleotides

**Protein length:** 322 amino acids

Genomic Sequence

> **ONAC088**

GTGGTTTCCATTTGCTCCTCGCCTAGCTAGCTTGTCTCTTCCCCGGAGGAGAAAAAGG  
 AGGAGACGAGAGAGAATTAATTATCTCGGAGATGAGCGGCGGCGGCGAAGGGGCGGCGGC  
 GCGGAGAGGCGAGGAGCTGCAGCTGCCGCCGGGTTTCAGGTTCCACCCGACGGACGAGGA  
 GCTGGTGATGCACTACCTCTGCCGGCGGTGCGCCGGCCTCCCCATCGCCGTCCCCATCAT  
 CGCCGAGGTGCACTCTACAAGTTCGATCCATGGCATCTCCCAAGTACGTCTCTTCCATC  
 TCCCTCCTCCATCCATGCAAACTTATAGCTACTGTTTCATCGATCGTCCATGACTCCATGC  
 AGGAATGGCGCTGTACGGCGAGAAGGAGTGGTACTTCTTCTCCCCTCGGGACCGCAAGTA  
 CCCGAACGGGTGCGGGCCGAACCGCGCCCGGGTCCGGGTACTGGAAGGCCACCGGCGC  
 CGACAAGCCGGTGCGGACGCCGAGGCCGGTGGCCATCAAGAAGGCGCTCGTCTTCTACGC  
 CGGCAAGGCGCCCAAGGGCGACAAGACCAACTGGATCATGCACGAGTACCGCCTCGCCGA  
 CGTCGACCGCTCCGCCCGCAAGAAGAACACCCCTCCGGGTACATATATACGCCATTAATTA  
 ATTACCTCGAATTTGCTCTTAATTCATCAAATTCAAATTCAGACGAATTCTACTCTCAGT  
 TAATCAAGTTTAGACAAGAAGTTCTAGCTGATTGGTTATCGGCACGATCGATATCATATG  
 ATTTTGATGTGGATTAACACACAAAAATTCGATCGAGATGCTAATTACTGATAAGATAAG  
 TACGGACTTTTGGAAGGACAAATGATTCCCTCTTGCTAGGTTAGCTTAGGTTAGCATCTGT  
 GTGCCGCTTTCTTGCAAGTGTGAACGCGGTGGATGCCGGCGCGGGTACCACCTCCACGC  
 GCGCAAATAATTTACTTTCTCTGTTTCACGATGTAAGTTATTCTAATATTTTCAAATTC  
 ATATTGATGTTCTATCTATATTCATTAAACATTAATATGAATGCGGAAATATTTATCTAG  
 ATTTATTAACATCAATATTAATATGAGAAATGATAGAATAACTTACATCGTGAAAGAGAG  
 AGTATTGTATAAACGCTAAGCTTTAAATTGCGGGCGACGATAGCGACGGATGCGAGGAGA  
 TATGCACGCCCACCAATAATGCGCTTCGGAGGAATTCGATTATTGTTTCATAATTATTGC  
 TGATACTGTTTGTTTTACATTAATTGGGCGGATTTTCATCATATATTTATTGTTGTGATCA  
 CGAAATGATATGGTCTTGATGAAATTTGATTTGATTTTGGTGGTTTGTGTTATTGCAGC  
 TAGATGATTGGGTCTGTGCCGAATCTACAACAAGAAAGGCGGCGTGGAGAAGCCGAGCG  
 GCGGCGGCGGCGGCGAACGTTTCGAATATGATGAGCCACGGGGAGACCGCGTCGGCGGGCT  
 CGCCGCCGGAGCAGAAGCCGGCCGTGCTGCCGCCGCCGCCACCGCCGTACGCGGCGGCGG  
 CGCCGTTCTCGGAGCTGGCGGCGTTCTACGACGTGCGGCCGTGCGACTCGGTGCCGCGGG  
 CGCACGGCGCGGACTCGAGCTGCTCGGAGCACGTGCTGACGACGTGCGCGTCGTCCGGCG  
 GCGTCGTCGAGCGGCCGAGGTGCAGAGCCAGCCCAAGATCGCCGAGTGGGAGCGCACGT  
 TCGCCGGCGCCGCCGCCCGGCTGGCGCCGTGAGCACGGCCGGACCGATTCTGGGCCAGC  
 TCGACCCCGCCGCCGCCGTCGCCGGCGGCGGCGACCCGCTCCTCCAGGACATCCTCATGT  
 ACTGGGGCAAGCCGTTCTGACGGCTCGGCTCGGCTCGGCGGCTTGAGCCGGGAGGGATGA  
 ATGATCTGATATTCTATCGGGGTGGCTCGGGCGAGCCGCTGGAATCGATCGGTGGCCGTT  
 GGATGGCGGCCGAGTTATTGGTAGCCGTCAGATGGGAGATGGAATGGCATTAGTTAGTTA  
 CTAGTATCCGTATGGACGGCGGCGATGAAACAGGGGAGCCCCGAGATGCGTGTAGGAAGG  
 AGATGCATGGTACTGTACTCGAGAATTATAAGCCGTGTGTATATGCGAAATTGGTTGGCT  
 AGATCGATCTGGGCGTATTTCTCTCTCGAGGCTCTTGCTATGTTTTTCATCTTTTTTAAA  
 GAAGACTGGACACTTTGTTCGATGCAACAAAGCATGCTGCATTTTTTACAAGGTGTCGGCA  
 ATCATATAATTATGCACTTGTATCAGCATTCAACATTTAAGCAAAGTGATTTTTTTAAGA  
 AAA

CDS

> **ONAC088**

ATGAGCGGCGGCGGCGAAGGGGCGGCGGCGGCGGAGAGGCAGGAGCTGCAGCTGCCGCCG  
 GGGTTCAGGTTCCACCCGACGGACGAGGAGCTGGTGATGCACTACCTCTGCCGGCGGTGC

GCCGGCCTCCCCATCGCCGTCCCCATCATCGCCGAGGTCGACCTCTACAAGTTCGATCCA  
 TGGCATCTCCCAAGAATGGCGCTGTACGGCGAGAAGGAGTGGTACTTCTTCTCCCCTCGG  
 GACCGCAAGTACCCGAACGGGTCGCGGCCGAACCGCGCCGGGTCCGGGTACTGGAAG  
 GCCACCGGCGCCGACAAGCCGGTGGGCACGCCGAGGCCGGTGGCCATCAAGAAGGCGCTC  
 GTCTTCTACGCCGGCAAGGCGCCCAAGGGCGACAAGACCAACTGGATCATGCACGAGTAC  
 CGCTCGCCGACGTCGACCGCTCCGCCCCGAAGAAGAACACCCTCCGGCTAGATGATTGG  
 GTCCTGTGCCGAATCTACAACAAGAAAGGCGGCGTGGAGAAGCCGAGCGGCGGCGGCGGC  
 GGCGAACGTTCAATATGATGAGCCACGGGGAGACCGCGTCGGCGGGCTCGCCGCCGGAG  
 CAGAAGCCGGCCGTGCTGCCGCCGCCACC GCCGTACGCGGCGGCGGCGCCGTTCTCG  
 GAGCTGGCGGCGTTCTACGACGTGCGGCCGTCGGA CTGGTGCCGCGGGCGCACGGCGCG  
 GACTCGAGCTGCTCGGAGCACGTGCTGACGACGTGCGCGTCGTCCGGCGGCGTCGTCGAG  
 CGGCCGGAGGTGCAGAGCCAGCCCAAGATCGCCGAGTGGGAGCGCACGTTGCCCGGCGCC  
 GCCGCCCGGCTGGCGCCGTCAGCACGGCCGACCGATTCTGGGCCAGCTCGACCCCGCC  
 GCCGCCGTGCGCGGCGGCGGCGACCCGCTCCTCCAGGACATCCTCATGTACTGGGGCAAG  
 CCGTTCTGA

Protein

> **ONAC088**

MSGGGEGAAAAERQELQLPPGFRFHPTDEELVMHYLCRRACGLPIAVPIIAEVDLYKFDP  
 WHLPRMALYGEKEWYFFSPDRDKYPNGSRPNRAAGSGYWKATGADKPVGTTPRPVAIKKAL  
 VFYAGKAPKGDKTNWIMHEYRLADVDRSARKKNTLRLLDDWVLCRIYNKKGVEKPSGGGG  
 GERSNMMSHGETASAGSPPEQKPAVLPPPPPPYAAAAPFSELAIFYDVRPSDSVPRAHGA  
 DSSCSEHVLTTSSASSGGVVERPEVQSQPKIAEWERTFAGAAAPAGAVSTAGPILQLDPA  
 AAVAGGGDPLLQDILMYWGKPF\*

**Gene Structure**

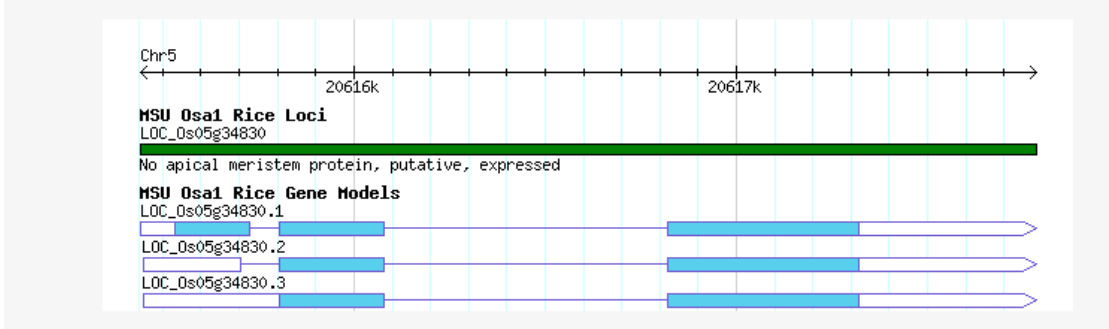

**LOC\_Os05g43960 (ONAC089) sequence information**

**Genomic sequence length:** 1634 nucleotides

**CDS length:** 1485 nucleotides

**Protein length:** 494 amino acids

Genomic Sequence

> **ONAC089**

ATGGCGGGATTAGGAAAGGGGGAGAGTAGCGGCGGCGGTGGCGGCGGCGGAGGGGAGATG  
 GGGTTCAGGTTCAAGCCGAGGGAGGCGGAGGCCGTGGAGTACTACCTTCTCCCCCGGCTG

CAGGGCCGGCCGCCCGTGCCCAACCCCGCCATCGTCTGGAGAACGTCTACGAGTTCGAG  
 CCGGAGCGGCTCATCAATGGTGCGCTCCTCTTCTTCTTTGATCGAGTTGTTCTTGT  
 TCTTGATGATCTTGATCGGATCAATGGCGTGAGAGAAAGTGCAACGGCGGCGTCGCCGGC  
 GAGGGCGAGGAGGGGTGGTACTTCTGTGCGCGAGGGATCGCAAGTACAGGAACGGGAAG  
 CGGCCGTGCGGAGCACGGAGGACAAGGCCGGGCGGTGGAAGGCGTCGACGGGGAAGACG  
 GAGGGGAAGGACCCGATCACGGAGTGCTATGGCTGGGTCAAGTTCTGCGTCACCAGCCTC  
 GTCTACTTCAAGGGCCCCGTCAAGACGGAGAAGAAGACCAAGTGGCTGATGCGCGAGTTC  
 ACCATCCCGCACTTCGAGAACAAAGCTCGACAAGACCGCCGCCGCCGGCGGCAGCAGCAAC  
 CAGGTCAGCCGCCTCTTGTTCTTGTGTTTTTTTTTTGGGTTAATCGCTGTAGCTCAAAT  
 CGAGCTTGTCTTGACGCGGCAGCTGGATCAGTACGTGTTGTGCAGGATTTACACGTCGC  
 CGAAGAAAGGCGCAGACGACGGCGAGCAAGCCGAAGTCGTCCGCGGCGGCGGCGGCGGCG  
 GCGAGGACATCGACGAGTGGGCGGAAGCCTGCGCTGTCTTCTGACTTGGGTCCCGAGACGG  
 CGGAGGGCAGCGACAATGCGGATGCGGCGGCGGCGGAGGGAGACATGCGGTGCGCGAAAC  
 AGGCGGGCAAGAGGCCCGTGCGGCGGCGGCGGCGGTGGCCGAGCAGCCGTCGAAGCGGCCGT  
 GGCTGCCACCATCACCGTCGACGCCATGTGACGGCGGGCCATCGCAAGCGATGGGCAACC  
 GCCAAGTCCCAATGCAGGGGCTATCACTCATGCACAACTTCCCGCCTCCGCCGACGACGT  
 TCTGCGGCCACGCGCCATTTAGCAAGGATTTCCCGGTGCACAACAACCGCGCGCAGATGC  
 GGTGGCCGACGATGCAGCACAATGCATGCCGTGCGCGGCGCACAGCTTCCAGCCGCGGC  
 CGGTGACGCGGCGACCGGTGCTCGTCCGCCAAGCGCCACCGCAGCGGCGACCGGTGCATC  
 ACGTCGGCGGCCACGCGCCGATGCACATGCACCAGGCGCAGTGGACGCCGGTGCACATCG  
 CCCAAGCGCCGATGCAGCAGCTGCCGTTTGACGATTGGGTGTTTCGATCCGTTTCGACGACC  
 CGCCACCGCCGATGCAGCAGCTACCGGTGATGATGAACAATACCAGCCGCAAGCGCCAA  
 TGCAGCTGCCCGGATGATGAACAATGACCAGCCGGCGATGGTGCACGGCGGCGAGCTCC  
 AGGCGCCAATGCAGCTGCTGCCGGCGACGACGCACGGCGGCGAGGTCCAGGCGCCAATGC  
 CGCTGAACGTGTACGAGGAGGAGCAGAGGCCATCGCAAGAAGACGGGGGACAATGCACAA  
 ATGCAGAAGGATGA

CDS

# > ONAC089

ATGGCGGGATTAGGAAAAGGGGAGAGTAGCGGCGGCGGTGGCGGCGGCGGAGGGGAGATG  
 GGGTTCAGGTTCAAGCCGAGGGAGGCGGAGGCCGTGGAGTACTACCTTCTCCCCCGGCTG  
 CAGGGCCGGCCGCCCGTGCCCAACCCCGCCATCGTCTGGAGAACGTCTACGAGTTCGAG  
 CCGGAGCGGCTCATCAATGAGAAAGTGCAACGGCGGCGTCGCCGGCGAGGGCGAGGAGGG  
 TGGTACTTCTGTGCGCGAGGGATCGCAAGTACAGGAACGGGAAGCGGCCGTGCGGAGC  
 ACGGAGGACAAGGCCGGGCGGTGGAAGGCGTCGACGGGGAAGACGGAGGGGAAGGACCCG  
 ATCACGGAGTGCTATGGCTGGGTCAAGTTCTGCGTCACCAGCCTCGTCTACTTCAAGGGC  
 CCCGTCAAGACGGAGAAGAAGACCAAGTGGCTGATGCGCGAGTTACCATCCCGCACTTC  
 GAGAACAAGCTCGACAAGACCGCCGCCCGCGGCGGCGAGCAGCAACCAGCGGCAGCTGGAT  
 CAGTACGTGTTGTGCAGGATTTACACGTCGCCGAAGAAAGGCGCAGACGACGGCGAGCAA  
 GCCGAAGTCGTCCGCGGCGGCGGCGGCGGCGGAGGACATCGACGAGTGGGCGGAAGCC  
 TGCCTGTCTTCGACTTGGGTCCCGAGACGGCGGAGGGCAGCGACAATGCGGATGCGGCG  
 GCGGCGGAGGGAGACATGCGGTGCGGCGAAACAGGCGGGCAAGAGGCCCGTGGCGGCGGCG  
 GCGGTGGCCGAGCAGCCGTGCAAGCGGCCGTGGCTGCCACCATCACCGTCGACGCCATGT  
 GACGGCGGGCCATCGCAAGCGATGGGCAACCGCCAAGTCCCAATGCAGGGGCTATCACTC  
 ATGCACAACTTCCCGCCTCCGCCGACGACGTTCTGCGGCCACGCGCCATTTAGCAAGGA

TTCCCGGTGCACAACAACCGCGCGCAGATGCGGTGGCCGACGATGCAGCACAACTGCATG  
 CCGTCGCGCGCGCACAGCTTCCAGCCGCGGCCGGTGCAGCGCGACCGGTGCTCGTCGGC  
 CAAGCGCCACCGCAGCGGCGACCGGTGCATCACGTCGGCGGCCACGCGCCGATGCACATG  
 CACCAGGCGCAGTGGACGCCGGTGCACATCGCCCAAGCGCCGATGCAGCAGCTGCCGTTT  
 GACGATTGGGTGTTTCGATCCGTTTCGACGACCCGCCACCGCCGATGCAGCAGCTACCGGTG  
 ATGATGAACAACCTACCAGCCGCAAGCGCCAATGCAGCTGCCGCCGATGATGAACAATGAC  
 CAGCCGGCGATGGTGCACGGCGGCGAGCTCCAGGCGCCAATGCAGCTGCTGCCGGCGACG  
 ACGCACGGCGGCGAGGTCCAGGCGCCAATGCCGCTGAACGTGTACGAGGAGGAGCAGAGG  
 CCATCGCAAGAAGACGGGGGACAATGCACAAATGCAGAAGGATGA

#### Protein

##### > ONAC089

MAGLGKGESSGGGGGGGEMGFRFKPREAEAVEYYLLPRLQGRPPVPNPAIVVENVYEF  
 PERLINEKCNNGVAGEGEEGWYFLSPDRKYRNGKRPSRSTEDKAGRWKASTGKTEGKDP  
 ITECYGWVKFCVTSLVYFKGPVKTEKKTWLMREFTIPHFENKLDKTAAGSSNQRLD  
 QYVLCRIYTSPPKKGADDGEQAEVVRGGGGGGEDIDEWAEACAVFDLGPETAEGSDNADAA  
 AAEGDMRSKQAGKRPVAAAAVAEQPSKRPWLPPSPSTPCDGGPSQAMGNRQVPMQGLSL  
 MHNFPPTTFCGHAPFQQGFVHNNRAQMRWPTMQHNCMPSPAHSFQPRPVQRRPVLVG  
 QAPPQRRPVHHVGGHAPMHMHQAQWTPVHIAQAPMQQLPFDDWVDFDDPPPPMQQLPV  
 MMNNYQPQAPMQQLPPMMNDQPAMVHGGELQAPMQQLPATTHGGEVQAPMPLNVYEEEQR  
 PSQEDGGQCTNAEG\*

#### Gene Structure

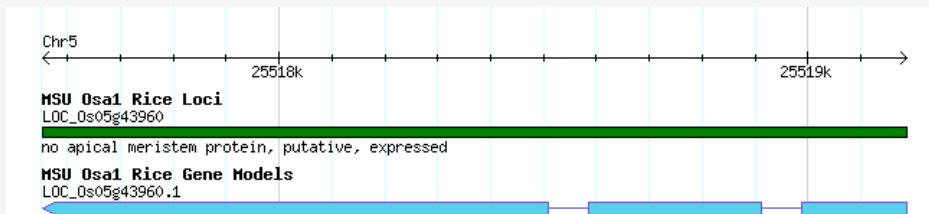

#### LOC\_Os06g01480 (ONAC090) sequence information

**Genomic sequence length:** 4761 nucleotides

**CDS length:** 1095 nucleotides

**Protein length:** 364 amino acids

#### Genomic Sequence

##### > ONAC090

CTAGCTTCGCCATCCACATTCTTCTTGCTTCTTGCTCCTCTCTCTCTCTCTCTCTCTC  
 TCTCTCTAGCTTCCCTGCTGCATCTTCCCTCAGCCATCTCTTTCATCCTCCCAGTCGTCC  
 CAGGCTGCTTAATTACATATATCTAGATATATATATTATTCTTGTTAATTTTCGATCCATC  
 AGTGTGCAATATATATATATAGTTTACCTCTAATATTTAGCTTCTTAATTTCTCCTCAT  
 TTTTCTGCCTGTGCTACTGCATACATGCGTTAATTCATGGTCGCCATGGATCGCATGGAG

ATCCGTTTCTTTACTACTCCACTTGTTTTCTCTAGCTACTAGTTTTCTCTTCTTCTTTTC  
ATCAAAACAATCAATCAATCATATCCCGTTCTATCTTCACACATCAACCCCGTTCCCTGTT  
CTCCGTTCTCTCTCAGCTGCAGCTAGCTACCTCTCCTCCTCTCTTCCGATCTCTCATCAG  
GATCGGATCGAGGAGGGAGGAGGGAGACCAACGATCGATCGAGCCATCCAGGATTTACTA  
GTCAATCAACAACCTTTATATATCATGTCAGCTGATGCATCCACACATCTAGGTATTGTGTA  
GCTAGGTTTCTGATGCTACTCTTGAGTTCATGAGCTTATATATATATATATATATATATA  
TATATATATATATATATATATATATATATATATATATATATATATATATATATATATAT  
GTGTAGAATTGTAGATCGACGACATACTTTGATTTATTTCATACTTCTTTAATTAATTATA  
TTTGTTGTTTTTTAAGATCCCTCACACTTTTGCTGATGATGTCTCATGTTGTTGTACATG  
CTTCTGTAACATTCTTCTTGGGATCTGAACCTGCAGATAACGAGCTAGATAGCTAGCTAG  
GGATCGAGAAGGAGAGAGAATATATACATACTGCATATATATATGCACATTGATCGAGCA  
ACTAATCCAGACAGGGATCGACAAGAGAACAAAAGTTCATTCATGTCTCCTAGCTAGCTA  
CTCTTATCTGCTACCTATCGAGATTCATCTTTGGATTTCTACAAGGATTTTGATCACATC  
ATACACTGATTTTAACCCAACCAACCACGACTGATCAAACCAAGGTATATATACATCTTA  
TCTTCCCTTGATTGATTTCTTGACCCTTGTTTATTGTGTGTATCTTATTCGATCTAATCC  
TCCTTGCAATCAAGCATGTATAAACCTAGATATATATGTAGTTATCGTCGTGTTTAATTC  
CAGATTTTCAGTAGAATTCTATGTGTGATACACATTTGACAAAAATACACAACATAATA  
CTCCCTCTGTTTCATAATGTAAATCATTCTAGCATTGCCCACATGCATATAGATGTTAAT  
GAATCTAGACGTCTATATGCATATGGGTAATGCTAGAATGACTTACATTATGAAACGGAG  
GAAGTAGATTGTTATTTTTTGCCCATCCGACCTTGTTTTTTTTATCAGAAAAGAAAGAG  
TAGCTAGACAAACTATATATATGCACAAATTATATGTACGAAATATGAAAACATAAGTAG  
TCGCATATGTTTCATATCATTTAAATAAATATATATTTCCACTCAGATTTGTCATTATTATT  
ATAGTCATCATTTTCCAGCTTTGATTGTCTCTTAACTAGAAATTTAATTTGTAGTTTTCT  
ACATAAAATTTCTTACGAAAATCTGTATGAAAAATAACGATCTATTATATATTTAACTTT  
TTAGCAAAATAAGTAATTAACCGCTGTGTATTGCATTTTTTAATTCAGATAACTTCAGGGA  
TGCATATATGGCCGGTATGCATTGTTAATTAACACTACTAGTAACACTACTTACATGCAGTATA  
ATAGCATAAGCTAATTAACCTCCAGTAAATTATACATAGTGTACGTTTTATATGTCAATTA  
TTTTTCAAAACCGATCCGCTGGTTTGCTTTCTATATATAGGAAAACGTTTGCATATTTT  
TACATATTATTATGCAAAAGGCTGATCAGTATGCATATAACACAAAAATATAGCAATTGA  
CTGCACATCTCTGAATTAGCTAGGATACTAATTACTGTGATAAACATGGACGTGGTAGCA  
CAATCATAAGTTCCCAAGCACGCGCAAAATGTACATGTACATGTGTACATAGGATCGAAG  
AGAGAAATTAACAAATAAGGTGTTTATATATACACTCATCGATCAATTAATCAGCAGATA  
GCTAGATCTACCCATTCAAATTAATTAAGCACAAAAGATCGAGATGGCTGGCTATAGC  
TGCAACATGATATCATCTCTGTATGTAATCAATAAGAGTACAATTAATCGAGCTTAAAAA  
TATGTACACGCAGGCAAGACATACTATACACAGATCGAGATGTACACACATACAGTACAG  
TTTGATCTATCTAGCTATACATGCAGTAGTAGTAGCTAGATAGTGTGACAAATTAAGGTT  
GCATTGGTAGCTAGGGACATACAGCATGCTGCATGCATGATGAGGACTTTTTCACTCACT  
ATGGTATGAGCTAGTGAGAGGAGAGAGGCCGGCCGGGAACATTCCACAAAGAGCAATGA  
GTGAGCATGCACCACATGCAGGCTGCAGGCAGCATATATATATATTTTATTTCATTCATTTT  
GTTAGCTAGTAATGCATTATGCGTGCGTCACTCCAAATCATCATCGATCGTGCTCACTCT  
CCCTCTCCTGCTTGCTAGCTGTTGCTTCCCTTCGACTGCATGCATTCCCTATATATATACC  
ACTACTGCACTTTTTCATTTCGATCTATCTAATCCATTATCACATGCATTTCATGCGTCTCCA  
GCCGGCCAGCCAGCCCCAGCCAGGTGTTTCACTGGATTAAAAAATCATGTATACAG  
TAATTAATTAACCTGCTCTCGATCGATCGACTACGTACGTACGTACATCACTGTAAGTATT  
CGTAGTTTATAACAATATTGACATGCATGCATGACTGTGATTTTCAGGCAAGCAGAGGCAG

GCTCTCAAATATATAGATAGATAGCGATCGATCGATCGAAATGGATGGATCTAGTATGAG  
 CAGCAGCAGCACGCAGCAGCAGGCGCAGGTTCCCTCCTGGATTTCGTTTCCACCCGACGGA  
 CGAAGAGCTGGTGGATTACTACCTTCGGAAGAAGGTGGCCGCAAGAAGGATTGATCTCAA  
 TGTCATCAAGGACGTCGATCTCTACAAGATTGAGCCATGGGATCTGCAAGGTCAGTACTC  
 AGTACAGTACGTACATGCATGCATATGATAGATGTGTACAATATTCGTGTGCTAATTAAG  
 CCAGCAATAATTAAGTGGGAGTATAACCATGCATGCAGAGCGTTGCCGGATCAATGGCGG  
 GTCGGCGGCGGAGGAGCAGAACGAATGGTACTTCTTCAGCCACAAGGACAAGAAGTACCC  
 GACGGGGACGAGGACCAACCGTGCAGCGGCGGCGGGTTCTGGAAGGCGACGGGGCGAGA  
 CAAGCCCATCTACGCCACCAAGCAGCACAGCCTCCTCGTGGGCATGAGGAAGACGCTCGT  
 CTACTACCGCGGCCGCGCCCCAACGGCCACAAGTCCGACTGGATCATGCACGAGTACCG  
 CCTCGAGACCACCGAGACGGCCCCGCGCAGGTAGGAGTATATATCTATCTATCTTCTTC  
 TTAATTTCCAGTTTCATCCATCTGCTTGCATATATATGCTAGCTTCAGAGAAACGTCACAT  
 ACTCCAATTAATGCAATTAATTCATTCAAGGTTATAAATTAAGAATGGATATGATGCAT  
 GCAGGAAGAAGGGTGGGTGGTATGCCGGGTGTTCAAGAAGAGATTACCCACAACAAGAAG  
 AGATTTCAGACCATGACGCACCTTGCGGCAGCTGGTACGTTGATGAAGATGCACCGGGCGC  
 CTTTCATGTCTCCGATGATGATCACCAGATCATCAATATTGCGCCACACCAACACCACGC  
 CGGCATCACGCTGCAAGAGCAACACCTCCACACCACTTACAAGCACAGAGACCTCACTAC  
 TAAGATTTCAGCAGCTCCAAGTCCCTGCGGCAGGCCATCATCTCCTCAACACCATGCCCCA  
 TGACCTGGAGAGTTCTACTTCCCTCCTTCCATTCTCTTTTGGTCTCACCTGATCACCACCA  
 AATCAACATGCACCATGCTCAGGCTGATCCCTTCTTTGACGACATGCATGCAGTCGATCA  
 AGCCACTACCACTGACTGGAGAGTTCTTGACAAGTTTGTGCTCTCAGCTTAGCAATGA  
 TGCTACAAACAAGCCTGCGGATCATTATACTGATGAAGGAGACATTCTTCAGGTCAGTGA  
 CAAGCAGCAAGAGGTGGCAGCCGCCGATTATGCGTCCACATCAACGTCAAGCAGCCAAAT  
 TGATCCATGGAAGTGATCGATCCATGCATGATCGATGCCCTGCACGCATTTAATCAAGAT  
 ATATTATATCTTATAGATAAAATTATCTCAATAATGATTATGATCGTATCGTATCAATTG  
 GACAGATCGATACAAGTGGTTTGAGCTACATATTAATGCCGTGTAAATAAGACTACTCTA  
 GCTAGTACAACGTGTGGTGTGTTGTGTGCTGCTTATATATATATTGACCTTCGTACGTGTG  
 TTTCTATATGAAATAAGGTCATGGAGGACAAATTAAGCTTCATGAATATAATCGTGGT  
 TTGTAATAGATAAACCTCTTCTGCTATGTGATTGTAAACTTCTGGTGTTCACATATGT  
 AACAAGTACGCCAATATGCAC

CDS

# > ONAC090

ATGGATGGATCTAGTATGAGCAGCAGCAGCACGCAGCAGCAGGCGCAGGTTCCCTCCTGGA  
 TTTCGTTTCCACCCGACGGACGAAGAGCTGGTGGATTACTACCTTCGGAAGAAGGTGGCC  
 GCAAGAAGGATTGATCTCAATGTCATCAAGGACGTCGATCTCTACAAGATTGAGCCATGG  
 GATCTGCAAGAGCGTTGCCGGATCAATGGCGGGTCGGCGGCGGAGGAGCAGAACGAATGG  
 TACTTCTTCAGCCACAAGGACAAGAAGTACCCGACGGGGACGAGGACCAACCGTGCAGC  
 GCGGCCGGGTTCGGAAGGCGACGGGGCGAGACAAGCCCATCTACGCCACCAAGCAGCAC  
 AGCCTCCTCGTGGGCATGAGGAAGACGCTCGTCTACTACCGCGGCCGCGCCCCAACGGC  
 CACAAGTCCGACTGGATCATGCACGAGTACCGCCTCGAGACCACCGAGACGGCCCCGCCG  
 CAGGAAGAAGGGTGGGTGGTATGCCGGGTGTTCAAGAAGAGATTACCCACAACAAGAAGA  
 GATTTCAGACCATGACGCACCTTGCGGCAGCTGGTACGTTGATGAAGATGCACCGGGCGCC  
 TTCATGTCTCCGATGATGATCACCAGATCATCAATATTGCGCCACACCAACACCACGCC  
 GGCATCACGCTGCAAGAGCAACACCTCCACACCACTTACAAGCACAGAGACCTCACTACT



AAGATTCAGCAGCTCCAAGTCCCTGCGGCAGGCCATCATCTCCTCAACACCATGCCCCAT  
 GACCTGGAGAGTTTCTACTTCCCTCCCTCCATTCTCTTTGGTCTCACCTGATCACCACCAA  
 ATCAACATGCACCATGCTCAGGCTGATCCCTTCTTTGACGACATGCATGCAGTCGATCAA  
 GCCACTACCACTGACTGGAGAGTTCTTGACAAGTTTGTTCCTCTCAGCTTAGCAATGAT  
 GCTACAAACAAGCCTGCGGATCATTATACTGATGAAGGAGACATTCTTCAGGTCAGTGAC  
 AAGCAGCAAGAGGTGGCAGCCGCCGATTATGCGTCCACATCAACGTCAAGCAGCCAAATT  
 GATCCATGGAAGTGA

#### Protein

#### > ONAC090

MDGSSMSSSSTQQQAQVPPGFRFHPTDEELVDYYLRKKVAARRIDLVNIKDVDLYKIEPW  
 DLQERCRINGGSAAEEQNEWYFFSHKDKKYPTGTRTNRATAAGFWKATGRDKPIYATKQH  
 SLLVGMRKTLVYYRGRAPNGHKSDWIMHEYRLETTETAPPQEEGWVVCRVFKRLPTTRR  
 DSDHDAPCGSWYVDEDAPGAFMSPMMITRSSILRPHQHHAGITLQEQHLHTTYKHRDLTT  
 KIQQQLQVPAAGHLLNTMPHDLESSTSSFHSLVSPDHHQINMHHAQADPFFDDMHAVDQ  
 ATTTDWRVLDKFVASQLSNDATNKPADHYTDEGDILQVSDKQEVAAADYASTSTSSSQI  
 DPWK\*

#### Gene Structure

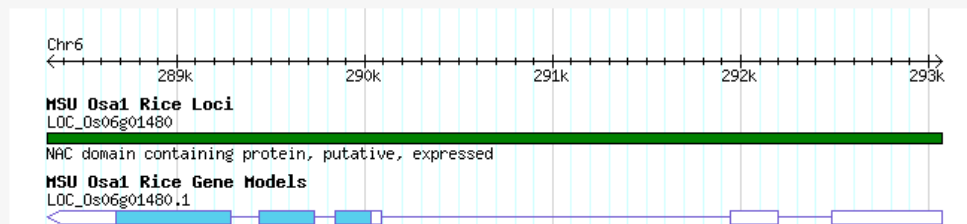

#### LOC\_Os06g15690 (ONAC091) sequence information

**Genomic sequence length:** 4813 nucleotides

**CDS length:** 1257 nucleotides

**Protein length:** 418 amino acids

#### Genomic Sequence

#### > ONAC091

GCCGGTCAACTCCGGTTCAAAAAAAAAATTTAGAGAGACCAACCACTCATCGTCTCTCTAC  
 TTCCATCCGCTTCAACCTTCAGGTGCGCCGCCCTCGCCCTCGTCGGATCCCTAGTAGGGAG  
 GGGAGGTCTCCGTCTGCCGCGGGAGGCGCGGGCGCCCATGACCGGTGCGTGCGTCT  
 GCCTGCCCCCCCCACTCCTTGATTGGATCGTGTAGCACTTGCCCCGAGCTGTTCCCCTAGG  
 TCATCGGAGGGAATGCGATTTGGGATTGGGCGGGATGCAAAGGAGGCGTCCTTTTGGGTT  
 CTAGGGTTTCGCGGATTGCGTTCCTTGTATCCTCACTGATTTGTTGTTGTTTATCAT  
 TTCGGTTTGGTGAATGCGATTTGGATTGGGGACAGTTTGCTGTGTGCTACAGTGAAAACA  
 TGGAGATTATCGCAGGATCCTCAGACTTCTCTATTGTTTTTTTTTTGGATTGATATAGAT  
 GCATTGTCTTGTATGAGGCCCGGTGTTTCGGACCGCGTCATACATTCGTGGAACAGTGT  
 GCTCATGCCTTCGGTGTGAGACGAAAGTTGTGTCTTTTTTTTTTTTTTTGGTTCTCTGGC

AGGCGATGACTGAATTTTCGTCAGCTTGTAGTGTGTAGGCTTTTGTAGCTTGGTCTG  
TGATTGTATAGTAGAAGGATGACGCTTCTGCATTGATTTTAGTTCAAAGGAGATACTTTT  
GTTTTTGCCATTTTCGGGGGGGGGGGGGGGGGGCGTGGTGGGGGTGCAGTTATGCACTACG  
TATGCATTCTGTTCTCTTGAATTGATTGAAGGGCACCCAGTTCTGCTAGGTGTTGCACC  
GTTTTAGTTTAGCTGCTGCTTCTTTCTACAGCGTGGTGTGCTAGTTATAGCGGTCTCCA  
TTATATCAATTTAGTTTGAAAAAACTAGTGGTGTACTACTCCTTTGAGTTAAAATGT  
GCCAACTATTAGTAGCTTGTATTTGGGTATACACCTCTCCAAGATGAGGTGAATTCCTC  
ATATTCATATAGTCGTGGGTAGCAATAGATAACCTTTTTTCTTTATATGTGGCCTGCTGA  
TAAGATCATGTCATGCATTGTGGAACAATATTTGTGCTATCTGTTTCAGATGAAAGGC  
GGGATCTGTTTTTTAGAATTTTTTTTTTTGGAGGGGGCAATGATTGAATATCGTCACTAGT  
TTGTAGTTTATGCTTTTGCAAGTTAAGTTGAGATTGTCTAGCAGAAGTACAACGTTTTTG  
CACTTCATTATAGTTGAAAGGAGGCATCTCCCTGTTTTCTGCCATTTCTGGTGGTATGGT  
ACCTATTTTATCAAATCTTTGTTGAAAAGACATTGGATATAGCCTTTGGGTGAAATTTT  
GCTAATTTTACTATTGTTAGCTTGTCTTTGGGCCATCAGGTATGCATATACATCTCTGAA  
AGCTAGAGGTTGCCCACTGCCTTGTATTCCTACTTTAGTACCCTTCACAAAATGGTGAAA  
AAAGACTATTGTTCTTAGTTTACGTATCATTGTGACCAGCATTTCAAATTGTGTCAGAAG  
AGCATAGTTTTGAACATATGCCTGTCATCCATACCGGAGATCAATGTCTCTTGATTTTTG  
TAAGCTGGTGCATGATTGGTATTAGTATAGATATACAGTTCTGAGAACTACATTTTGTT  
GTAGATTGAATCGTGGTTTAGGAGTACTTGTCTCCTCAGGATTAATTGGATCATTCTTTG  
GGATCATTTTAATGATATTAGATGTGCCCTTACCTGCATTTGGTGTGTTGCTGGTTAATT  
ATGCCGATCTATATGGGAGTTCCTGCAGTTAGTGTCTTGAACAAATCTGCTTCATTCAT  
CTGTCTTAACTCTATAATCAATATTTCTGCAGGACATCCTGGATAATTGACAGCCATAGA  
ATTGCTTCAAAAAATAAAAAATGCATCTGGATCGGTGGATGCCAGTAAGCACAAATGGGTT  
AGCAACCCAACTAAGGCTTGTCCAAGGTGCAACCACATCATTGATAACAGTGATGTAAGA  
GATGTGTTCTTTTATCATGTATAAGAACCAAATACGCACGTAGTATATCATTGTATTTC  
ATTCTGCTTTATACCATTCTAAACAGATTAAACAATCAAATAAACTACATGTGAACAC  
CTACTGAGTAGTGTCAATTGTTATGCACCTTTGTTTTCGTCGAGTCGCCTATATCAATAAA  
TGAATGGATTTTTGCTATTAGCAACTTACTATTTATCACTTTGACAGTGAATCTTTTGTA  
TATTATTCTGAAGTCCCTGACTTTCTCTCTAACATCGAAGCTTTGTTTGTGTATACTTT  
CAGATACACCACTCAGTATTAATAAAATAATGTGTGCTATTGAGTGCAGTCCTCTAATGAT  
TAATATTTCAACACAGGTTGTTTCATCAATGGCCTGGTTTGCCAAGAGGTGTAAAGTTTGA  
TCCAAGTACCAAGAATTGCTTTGGCATTGTGCTTGCAAAGCATGGCAAAGTTGGTGCAAA  
AGCTCATCCGTTTCATTGATGAATTTATCCAACAGTCGAGGAAGATGATGGTATCTGCTA  
TACCCATCCACAGAACTTCCAGGTAACCGTTAGTGAAAGGATATATATTTTGTCTC  
TCTTCGTGGGGTGAGCAAGAGAAGTCCAATTTTATTTTCATATAAGAGTAAAATTCACAT  
TTTTTCAGCTTGTATCAAATGCTTGCCCTTTGGTCCGTTTTCTTTTGGTATTTATTTTCTTA  
GTCACACCATATGCACAAAGTTTGGCGGTAGTGCAGGTGTGGCAATAAGGCTACTTATTT  
TACTTCTCTTTATTGGCTTATTAACCTTTGATTTTTTCACTATTCCTCAGCAACACTCT  
ACAATAAGTAATTCTCATTGACTGGTTTGCATTTCTTAAATGGTTCGATAGAGCATTC  
AAATTCTACTTTCTTTTGACATAGGAATCTCAGTTTCTAACTGGAAAATTGTTGTTTTTT  
GTACCTCTGTTGTATTGCTTGTGGTATTCTTCAACTGACTTTTTTTTTCTTTTCAGGTGT  
CAAGCAAGATGGAAGCGTATCACACTTTTTCCATAGAACATTTAAGGCCTATAATACTGG  
AATAAGAAAGCGCCGGAAGATAAACTGGTGTCTTGCTGATGTCCGCTGGCACAAGAC  
TGGTAAGACAAGGCCAGTAGTAGTTGATGGAAAACACCTTGGTTGTAAGAAATTCATGGT  
GCTATATATGAGCACCATGAAAGGTGGTAAACCTGAAAAGACCAATTGGGTGATGCATCA

GTACCACCTAGGAACTGGGGAAGATGAGGTAGAAGGGCAGTATGTTGTCTCTAAATTATT  
 GTTTCAGCAACAGTTTAAACCTGGGGAGAAGAACGCACAGGACTTAACCTCTGCAGATGC  
 TTTAGAATCTATAGTTGCTGAAGATCTTCCAAATATTCCTCCACTTCCCCTGGAAGAACA  
 TGTTTTTACCAACCAAGAACTAGAAGTTCTTGAGAAATCTGAACTATCACTGACCAGGT  
 AATTGAACATCTAAGCTTTCTTTATTTCCCTTCCACCTTTTCCCTATGTGCAGCACATAT  
 TTCCAGGTAATTCGACATAGCAAAGAAAATGTCAATATAGTTTCTTTATAATGATATTAA  
 AGGGAATTGGATAAATGTTGTGCCTTCTTTTGCTGGCAAATGTACAGGGAAAAGAGACTA  
 GCGAAATAAACGAAGATAACGCTGTAGAAGATGTTGCGCATATGGCTACTGAGAAAC  
 CTGAGGATGGAGATAACCCCTCATCGCAAGATCCGAAATGGTGGGAAGGTGAATCCCAGT  
 TCCTGTTAGACTCTCAGCAACTGGCAGAGAACCCTTGCATTTGCGATGAGTTCCTTCAGA  
 GTCAGAGCCAGACCTCATGCGGCGGTGGAGATGATGAAACCGATAAGATAAAGCCCCGTC  
 TTGCTGTTTATGCCAGTTGCCAGTAGAGGACTTGAAGAAGGATCTGGAAGAATGCCAGA  
 GGTTGGACCCCTCAGATGGCACAATCTTGAGCTTGAAAATGCGTCTGAATTTGACTGA  
 GCCAAATTGTACGTTTCCATTGTCTCATGTTAAAACGTCCAGTTTTCTCTCCATCCTTTA  
 CTTTGCTAAACTTGTGCTTCACTTGCAGGAGTTTTTCGAGGATAGCTTTACGACGGCATG  
 GGCTGGTGCAAGGTGATCGATTGACATGTCTCCAAGGTGCTGTCAACACCATTTTGTAC  
 ATTGAAGAAACAACTGAAGCCTCTTCCTTCTGCGAGACAACAGTAAAATGCTGTGATAT  
 ATGTGGTGAAGCAACTCTTGCTCGGACAGTAAAAAGTCATAATTTTGGCCCGCGGCTT  
 GCCGGGGTAGGCAAAAAGGTGAGCTTATGCGCTGGCTTGCCCCTGAATCCCTTGATGCATA  
 TGGACTGTGCACCGGTGACTATTCAATGCTAAAGATCACATATTCCTGGCTGTAAATTGT  
 GATGGTGGATGTCTCATTTTGCTTGGATACTCTGGACCATCCGGTGGTACAAGGGGAAC  
 TTTGCTTCTGGTTGAACTGATTACTCCAATAACTTTCTGTGTTAATAACTTTTGCCATCAT  
 GATAGTGCCTATTATTTATAAATGTGGACACAAGTCATTTTCTGGAGCTTGTGGTAAAGC  
 AGGGCTGAGAATCTCGTGCAAGCTTCATCTTGTAATGCAGTAATCAGCATAAGATTGT  
 GACAGATAACTTCCATGTTTCAGTTCCCTATGCATTACTACTATCTAATTTTCCCTCGGGCA  
 ATGAGCATGAACT

CDS

> **ONAC091**

ATGACCGGGACATCCTGGATAATTGACAGCCATAGAATTGCTTCAAAAATAAAAAATGCA  
 TCTGGATCGGTGGATGCCAGTAAGCACAAATGGGTTAGCAACCCAACTAAGGCTTGTCCA  
 AGGTGCAACCACATCATTGATAACAGTGATGTTGTTTCATCAATGGCCTGGTTTGCCAAGA  
 GGTGTAAAGTTTGATCCAACAGCAAGAATTGCTTTGGCATTGTGCTGCAAAGCATGGC  
 AAAGTTGGTGCAAAAGCTCATCCGTTTATTGATGAATTTATTCCAACAGTCGAGGAAGAT  
 GATGGTATCTGCTATACCCATCCACAGAACTTCCAGGTGTCAAGCAAGATGGAAGCGTA  
 TCACACTTTTTCCATAGAACATTTAAGGCCTATAATACTGGAATAAGAAAGCGCCGAAG  
 ATAAACACTGGTGATCTTGCTGATGTCCGCTGGCACAAGACTGGTAAGACAAGGCCAGTA  
 GTAGTTGATGGAAAACACCTTGTTGTAAGAAATTCATGGTGCTATATATGAGCACCATG  
 AAAGGTGGTAAACCTGAAAAGACCAATTGGGTGATGCATCAGTACCACCTAGGAACTGGG  
 GAAGATGAGGTAGAAGGGCAGTATGTTGTCTCTAAATTATTGTTTCAGCAACAGTTTAAA  
 CCTGGGGAGAAGAACGCACAGGACTTAACCTCTGCAGATGCTTTAGAATCTATAGTTGCT  
 GAAGATCTTCCAAATATTCCTCCACTTCCCCTGGAAGAACATGTTTTTACCAACCAAGAA  
 CTAGAAGTTCTTGAGAAAATCTGAAACTATCACTGACCAGGGAAAAGAGACTAGCGAAATA  
 AACAACGAAGATAACGCTGTAGAAGATGTTGCGCATATGGCTACTGAGAAACCTGAGGAT  
 GGAGATAACCCCTCATCGCAAGATCCGAAATGGTGGGAAGGTGAATCCCAGTTCCTGTTA

GA CTCTCAGCAACTGGCAGAGAACCTTGCGATTTGCGATGAGTTCCTTCAGAGTCAGAGC  
 CAGACCTCATGCGGCGGTGGAGATGATGAAACCGATAAGATAAAGCCCCGTCTTGCTGTT  
 TATGCCAGTTGCCAGTAGAGGACTTGAAGAAGGATCTGGAAGAATGCCAGAGGTTGGAC  
 CCCTCAGATGGCACAAATCTTGAGCTTAAAAATGCGTCTGAATTTGACTGAGCCAAATT  
 GAGTTTTTCGAGGATAGCTTTACGACGGCATGGGCTGGTGGCAAGGTGATCGATTGA

#### Protein

#### > ONAC091

MTGTSWIIDSHRIASKIKNASGSVDASKHKWVSNPTKACPRCNHIIDNSDVVHQWPLPR  
 GVKFDPTDQELLWLLAKHGKVGAKAHPFIDEFIPTVEEDDGICYTHPQKLPGVKQDGSV  
 SHFFHRTFKAYNTGIRKRRKINTGDLADVRWHKTGKTRPVVVDGKHLGCKKFMVLYMSTM  
 KGGKPEKTNWVMHQYHLGTGEDEVGQYVVSLLFQQQFKPGEKNAQDLTSADALESI  
 EDLPNIPPLPLEEHVFTNQLEVLKSETITDQKETSEINNEDNAVEDVAHMATEKPED  
 GDNPSSQDPKWWEGESQFLDSQQLAENLAICDEFLQSQSQTSCGGGDDETDKIKPRLAV  
 YAQLPVEDLKKDLEECQRLDPSDGTNLELENASEFRLSQIEFSQDSFTTAWAGGKVID\*

#### Gene Structure

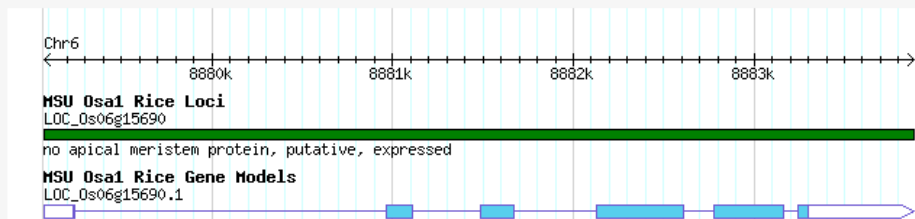

#### LOC\_Os06g23650 (ONAC092) sequence information

**Genomic sequence length:** 1799 nucleotides

**CDS length:** 1122 nucleotides

**Protein length:** 373 amino acids

#### Genomic Sequence

#### > ONAC092

ATGGAGCGGTGCAGCGTGCTGGGGCTGGGCGGTGGCGGGGCGGGGCGGGCGGCTGGAC  
 GGCGAGCTGCCGCCGGGTTCCGTTCCACCCGACGGACGAGGAGCTGATCACCTACTAC  
 CTGCTGCGGAAGGTGGTGGACGGGAGCTTCAACGGGCGCGCCATCGCGGAGATCGACCTG  
 AACAAGTGCAGCCGTGGGAGCTGCCGGAAGGCCAAGATGGGGGAGAAGGAGTGGTAC  
 TTCTACAGCCTCCGCGACCGCAAGTACCCACGGGACTCCGCACCAACCGCGCCACGGGC  
 GCCGGCTACTGGAAGGCCACCGGCAAGGACCGCGAGATCCGCAGCGCCCGCACCGGCGCC  
 CTCGTGCGCATGAAGAAGACCTCGTCTTCTACCGCGCGCGCCCCAAGGGCCAGAAG  
 ACCCAGTGGGTCATGCACGAGTACCGCCTCGACGGCACCTACGCCTACCACTTCCTCTCC  
 TCCTCCACCCGGGTCAGCACTTTCCCCATTTATTTTCTTCACCTTTTGCCCATTTGTGTTG  
 TTCACTTCATCCTTTGGAACTTTCTGTTGTTGTTCTTGCTGCGGATGATGTGTGCAACA  
 TATGGTAGGAATAAGTCACGAGGGGTCTAGGGCACAATCGCTAGCTCTGAGCTTGCTTTT  
 CTGGTGTGAAGTCATCAGCAGCGAGTCCCTCCCTGCGCTGCTATGCTACTTCCTGTAGC

AGCGCAGGGGTGCTGCGACGCAGATTGCTGCATACTGTACGTAGATATGGTAATCGGTCA  
 GCTTAGCGCAGTGAAAAGATCAGAGGCTGCAGCTTAGCAGGATACGAATCTTTTTTTGGCC  
 TCATGGAAGCTTATATGCAATCCAACGCATGAATGCGTGGATACATGAGAGCACAAGGTG  
 TAAATGCATACTGTACTCCTTACGTATTTGCAATTTGCATTTAGCAAAAATAGATGCCTT  
 GGGCATACATCTGCGTTTGTCAATTTGAGCGAGTAAACCAAAGAGGAACAAAGTTTCGCCTT  
 GTGCAACGTGCACGCGAAATCGTAGTACTGTACTGCTGCTACACAACCTTGTACTACCCT  
 TTTTTTAGTTTCATGATATATATACACAGTTAAATTCGTGTTGCTACACAACCTTGATTCT  
 TAATTTCTCTGTGTTGATGTGTCGTGCAGGATGAGTGGGTGATAGCCAGGATCTTCACCA  
 AGCCCGGCGTGTTCCCCGTCGTCCGCAAGGGCCCGCTCGGCATAAGTGGCGGCGGCGGCG  
 ACACCTCGTGCTTCTCGGACTCCACCTCCGCCCTCCGTCGGCGGCGGGGGCGGCACCTCCG  
 CCTCGTCGGCGCTGCGCGCGCCGCTGGCTGAGGCCTCGCTGTTCCGCCCGCCGCGGCGC  
 CAGCCGTTGACGGCGCCGACAGCAGCAACTACGGCGGGGGCGGCGGCGCCGCGCAGCGCCA  
 CCGCCACCGCCAACCTTGCTACCGGCCTTGAGCTCGTGCCCTGCTTCTCCACCACAGCCC  
 ACATGGATGCCTCGTTCGGCACCGGGCAGTACAACCCGGCCCCGCTGGCCGTCGAGCCGC  
 CGCCGCCGCCCGCGCCTTCTTCCCGAGCCTCCGCTCGCTGCAGGAGAACCTGCAGCTGC  
 CGCTGTTCTCTCCGGCGCATGCAGGCGGGCGTGTCTGTCGAGCCGCTCAGCGGCGGCG  
 GGGCCTTCCACTGGCAGTCCGGCATGGACGTCAAGGTCGAGGGCGCCGTCGGCCGCGCGC  
 CGCCGCAGATGGCCGTGGCCCCGGCCAGCTCGACGGCGCCTTTGCATGGGGCTTCTAG

#### CDS

#### > ONAC092

ATGGAGCGGTGCAGCGTGCTGGGGCTGGGCGGTGGCGGGGGCGGGGGCGGGCGGCTGGAC  
 GGCGAGCTGCCGCCGGGGTTCCGGTTCACCCGACGGACGAGGAGCTGATCACCTACTAC  
 CTGCTGCGGAAGGTGGTGACGGGAGCTTCAACGGGCGCGCCATCGCGGAGATCGACCTG  
 AACAAGTGCAGCCGTGGGAGTGCCGGAAGGCCAAGATGGGGGAGAAGGAGTGGTAC  
 TTCTACAGCCTCCGCGACCGCAAGTACCCACGGGACTCCGCACCAACCGCGCCACGGGC  
 GCCGGTACTGGAAGGCCACCGCAAGGACCGGAGATCCGCAGCGCCCGCACCGGCGCC  
 CTCGTGCGCATGAAGAAGACCTCGTCTTCTACCGCGCCGCGCCCCAAGGGCCAGAAG  
 ACCCAGTGGGTGATGCACGAGTACCGCCTCGACGGCACCTACGCCTACCACTTCCTCTCC  
 TCCTCCACCCGGGATGAGTGGGTGATAGCCAGGATCTTCACCAAGCCCGGCGTGTCCCC  
 GTCGTCCGCAAGGGCCGCTCGGCATAAGTGGCGGCGGCGGCGACACCTCGTGCTTCTCG  
 GACTCCACCTCCGCCTCCGTCGGCGGCGGGGGCGGCACCTCCGCCTCGTCGGCGCTGCGC  
 GCGCCGCTGGCTGAGGCCTCGCTGTTCCGCCCGCCGCGGCGCCAGCCGTTGACGGCGCC  
 GACAGCAGCAACTACGGCGGGGGCGGCGGCGCCGCGCAGCGCCACCGCCACCGCCAATTG  
 GTCACCGGCCCTTGAGCTCGTGCCCTGCTTCTCCACCACAGCCCACATGGATGCCCTCGTTC  
 GGCACCGGGCAGTACAACCCGGCCCCGCTGGCCGTCGAGCCGCCGCCGCCGCCGCCGCC  
 TTCTTCCCAGCCTCCGTCGCTGCAGGAGAACCTGCAGCTGCCGCTGTTCTCTCCGGC  
 GGCATGCAGGCGGGCGTGTCTGTCGAGCCGCTCAGCGGCGGCGGGGCCTTCCACTGGCAG  
 TCCGGCATGGACGTCAAGGTCGAGGGCGCCGTCGGCCGCGCGCCGCCGAGATGGCCGTT  
 GGCCCCGGCCAGCTCGACGGCGCCTTTGCATGGGGCTTCTAG

#### Protein

#### > ONAC092

MERCSVLGLGGGGGGGRLDGLPPGFRFHPTDEELITYYLLRKVVDGSFNGRAIAEIDL  
 NKCEPWELPEKAKMGEKEWYFYSLRDRKYPTGLRTNRTAGAGYWKATGKDREIRSARTGA  
 LVGMKKTLVFYRGRAPKGQKTQWVMHEYRLDGTAYHFLSSSTRDEWVIARIFTKPGVFP  
 VVRKGRGLISGGGGDTSCFSDSTSASVGGGGGTSASSALRAPLAEASLFAAAAAPAVDGA  
 DSSNYGGGGGAGSATATANLVTGLELVPCFSTTAHMDASFGTGQYNPAPLAVEPPPPPPA  
 FFPSLRSLQENLQLPLFLSGGMQAGVSSQPLSGGGAFFHWQSGMDVKVEGAVGRAPPQMAV  
 GPGQLDGAFAWGF\*

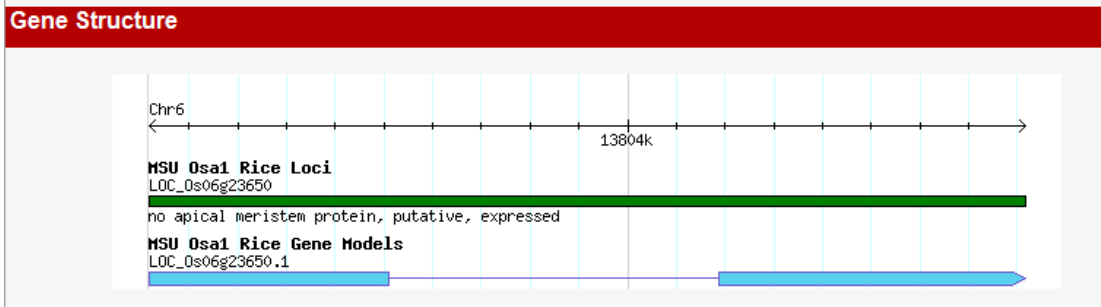

### LOC\_Os06g36480 (ONAC094) sequence information

**Genomic sequence length:** 7817 nucleotides

**CDS length:** 1704 nucleotides

**Protein length:** 567 amino acids

> **ONAC094**

TTTCGTGTGTGCCTGGAGAACCTTTTCCTTTCTATCTCTTCCCTTCCTTCAGTTAAAGCC  
 ATATCAAAACACATGGAATTCGGTCTCCAAATCTTTATTAATTGCTTCCTCAAAACCCCC  
 TCTTGCCCCCTCTCTCTTCCCTTTCCCTCTCTCCTCTTCTTCTTCTACCTCCC  
 TCTCCCTCCCCATGTGAGTGATCCTGCTACATGTTACATGTGATCATGCACAGGTAGGTG  
 AGCTCTAGCCCCGATCAAGGAGGTGCAAGCTTCTACTGCCATCTTTTCGGCGAGAAGGA  
 GATCGAGGAAGAAGATCAGAAGCTCAGGTAGCCGCCATGGATGGTGTGGTAGCAGAAGAT  
 CAAGCAGGCGGCAGCGGCAGCGGTACCCGCCGCTCATCGGATCGAGGATCGAGGAGCAC  
 CGCAAGTACATGTCGAGGAGAGCTGCTGCCCGAGGTGCGGCCACAAGATCGACCGGAAG  
 CTGGTACGCGTGTGTGTATCACACTTTGTTAATTAACCATGTTAATTAATAGTTTGCTA  
 TATATGTGTGTTGTTGTGTGTCTGAATTCTGAATTTTGTGGAGTTGTTGATGCCTGAA  
 TTTTTCGTGTGTCTGTGAAGGACTGGGTGGGGCTACCGGCCGGTGTGAAGTTCGATCCGA  
 CGGATCAGGAGCTGATTGAGCATCTCGAGGCGAAAGTCCGGCCCGCGGCGAGGCGGCGG  
 CACACCCGCTCATCGACGAGTTCATACCCACCATTGAAGGGGAGGATGGAATCTGCTACA  
 CCCACCCTGAGAAATTGCCAGGTAAATATGTGCAATTGATTAATCAAGTTCAGTTCTTCA  
 AAAGGATGTTAATGTGTGTGTGTTTTTTTTTTTGTGTTTTGGAGGTTTGCACCTTCTG  
 TTTCTTTTACTTGCTTCAGTTTTTTCCACCATTCTTTCTTCGGTTTCTTTTTCCCTTTC  
 TGTTTCGGTTCATATCTTCTCCTCTCCTTGTATCTCGCATTTCTAGAATTGTTTTAAATG  
 ATACTTGATAGCTAAGCATGCATACTCCCCACACACACCAAAAAAAGAGAGAGAATAAA  
 TGGCATCAATGGTAGATTTAATTTGCAAGTGTGTAATGCACTGTAGGAATCTAGCTTGTG  
 CAAGAAGGGAAACAGTGGTACACCAAATCTTCCAGTACATGTACTGCATGTATAGCTAGT  
 CAATCAATGTGTTGTTGTTGTGGCAGCACATCTCACACACCCTCTAAAAATTTGAAAAAC  
 ACCATCTCTCTCTCTCTCTATCTATCTCTAGAAAGAGAGAATGAAATGTGACATGAGAT  
 CTTTCCAGCCCCCTGCACATCTTCCAAAGTTAGGTTTTGTCTCCTCCCAAGGTTGTTAT



CCAGGCTGATGTCGCCGCCGCCGGCTCACCAGGGCACCCTCATGCTCCGGCAGCCGGAGC  
CGCCGTATATTTACCATCACCAGGTACACGATCGTAGTAGCTCGCTAAAAATAACGACGT  
TTTGGACTTTTCAAATACAAATTTGACTAATAATTTAATTCTCTTTGGTTATACATTTGA  
AAAGGTTATACAAGTGTGATATATATTGCGAAAAGAAATTTGTTATGATAAACTTAGCTAGC  
TATATAATTTTTATATGCTTAAGACGAGTGACTTTAGCGTGGTGTCTACTGGTAATATTC  
TAAATCTTACAACATAATTCTTGTGATCATTGGGACGTAGTAATAGATTTCGAAATTAGCA  
CGTACTACACTTCTTTTGGCATTGTAGCCCTTGTATTAAGCCACGTACGTCATGATATAT  
ATCCGTATACTTCTATTAATTATTAATTAGTATTGTGTATATATAGTAATTGACTGTCAA  
TTAGTCCTATTAATTAATTGTTTGGTCTGATTTGCGAGAAAATGATCAGCAGGAGGATGA  
ACGGCCACACCAACCGCGAAAGTTTGATGGGAGGTGCGACCTCTGGTCTGGACTGGAGGA  
GGTGATCATGGGCTGCACCTCACGGAGGTCCAAAGGAGGGGTACGTAACCATATATTTCA  
CGTATATATACATATCTCTCTCTCACACACAGACTGCAGATACATACTCTGATTTTATAT  
GCTTTACATCCATCTCATGTACGGTTGCACATCCAACAACCTGTTTGATCGTAGCTAGTG  
GCATTCACGTTTAACACGGTGCTTAGATTTATCTGATATAGTTAGCTACTCCCTCCATCC  
CAAAACACAATAACTATATATGTATCTGGATAGAGATTTATCTAGATAGATACATATATA  
GCTAAAATATGTTTTATTTTGGAAATGGTGGTAGTATTACTACAGCTATTTAAGAATGTAT  
ATATAGTTGTGTTCTAATTTTAGGAATAAGCACAAGAAAAGTATAAAATGTATTTTTCT  
AATAATAATAATAATAATAATAATAATATCATTCTAGCTATGTGTACGTGTTGTAC  
ATGAGTGGAGTTTTCTTTTTATTAATATACAAAGGGTGATTTTACGGTCCTTGAGTTAGT  
ATGGAGTATCCACATTATTTGTTACTCCCCCGGGCTGATAATACTTGTCGTTTTAGACA  
AGGGTAAGGTCAAACCTTTATAATCTTTGATTATAAAATCATTTTTAAAAATATTTGTCTTT  
AAATATGGTGACTACATGTATAGATTAGTCTTAAAAAGTACTTTAATAAAATCATATATT  
GTAAACACTTTTATACATATTACAACGGAAAATAATGGTCAAAGTTGTTTTTTGGAGACC  
GTGCATGCTCTTGTCAAAAACGACAAGTATTATCAACTGGAAGGGAGTATTAATTTGTGT  
TAGCTCCTGATGCACTACAAAAGTACGGAGAGACACCACAATTTACACCATAATGTGGTA  
CTTTTCTGTACCTCTAAAAGAAAGTAGTAAAAAACTATTGTGTGCAAATAATATACACCT  
TTAATTAGCATGTAAACATGTAACCTGCACATGAATTTTTTTTGCTTAATTTGTAGTGAAT  
TTATAGCTAGCTAGTTACTATTTCTATAACTCTTGAAGATGAATTTATAATGGTGGGAGA  
GGGTAGGGTTGGAAGAACCATCAACCCGGGTTTTATTCAACGTGCATACTTTTTTTTTAA  
AAAAAAAACAACATTGTTTTATTCAACCTGACATTTACATATAGCATCAGGGAACGTGC  
ATACTTTTTTAAAAAAAACCAACATTGTTTTATTCAACCCGACACTTCTATTTAGCTGT  
TCCTTGCTATTTTTTCATATGGTAGAAGCTAGTTTTTCGTCATAAAATATTCCATTAG  
TTATACAAAACAATGTGGATTTGGAACTTATGCATTTGGCTAGCGGTTTGATTATAAT  
ATACTTGTAAGTTGTAACGCCTAGCGTGATTATGTTATTTGGATGAAATTTATGTGAGA  
AAATATAATGGGGAAATGTAGCTTTGTCAATTTATGATGGCATTTTTTCCATGCCTGCAT  
AGAAATATTTGACAACCATAATGCATTCATATTTTTTCCCGAAAGTTGAGTGTCTAAT  
TTTGTTTCATGGTGAAAAATGCATTATTTTATTATTTGATATCTAAGGCACATTATATTTT  
GTTGGGCGACCAAGTACAAGATTATGTGTGTTTCTCTTTTTGTCTTTTAAATAATATAAC  
ATATAGCCTCTTGTCATCTGGGTAAACACTCTTTAATTAATCTTTTTTTAACTGTTTTTT  
CTCTCCAGGAAACATCAGGTGGTAAGGATGGCACAGAATGGCAGTACCCATCCTTCTGGC  
CATCTGACAGCCAGGATCATCATGGGTAAAAGAGCAACGTATCTAGCTGCACCTTGAGTA  
TGAGTAGTAGCCAATCTCGGTGAGGCAACCAAAAAGCAAAACAAGAACCCTGACAACATCA  
TTACTACCATGATAGGAGCAGCATACATGCACTATATACACTCCTACAAGACTAAAAGCT  
CACCAGCTTAGCACATAGCATAGGAGGCAGGAGTGGCTTCCAAGAAACACACAAAAGGCA  
AAGTTTGCAACAAAATCCAACCCCTAACTTTTATCCCCCCTTCTCCCTCTATCTCTCT



CTTCTCTCTCTCTCTCTCTACTTCATCTTTCTCTTCACCCAATGTGTCTGGATAACGGGAT  
GGAAGTTTCATTTGAGTGCTCAAATTTACATGTCTAAAGAGACAAAGATGATATTGAAGC  
AAAGCAAAAGGGAGAGACAGAAAAAGAAAAAGGAGAGGAAAAACAAAGGTGACATCACAA  
GGAAGGTTAGTTAACCGTCGGTTGCTCAGGCGGATTGATGCGAAATCATCACCGCGATCA  
TTGTTTACCGACACCTTTCCGACAAAGTGATTGAATGTTAGTCTAATAATCAGGAGTATT  
GATAAATATTTTATTACTTTTGTTGTATTGATTTGATTGGTTAATATTAATTGTACACCA  
TTACCCCTTTTCCTTTTGTCTTATACTGAGAAAAGAAGCTAACATGTTGGAAAAAGAATGA  
AAGGGTCAATTTGTAAAGATGGCACAAGTTCTCATTTGATTGGTCCATTTGTTTCTACAG  
ATTTGAATTTTTTATAGTTTCTCAAGATACACATTTGCCAAGAAATATTCCATGAACAAG  
GAAACTCTAAAGATTTCTAGGTATGCATGGCTAGCTTTAGTTCCAAAATCTTCCTTTTTTC  
CTAAGGAATATCTTTAATTGGTTCCAAAACTCCTCAGTGGCATGCATGAGGAGGGAATA  
AATGTTTCCATATTCTTCTGTGATTCTGTACATGCAAAAGAAGAGAGCTAGCTAGGCGC  
AAAGAAAAGCTTGTACATATCTTGTCTATAAACGAAAAGCTTGATCTTACCCTCTTACTC  
CTTCTGTACCTCTTTCTCTCTTGTCTTTTGATTTCTTTTTTTTTTCTTTCAAAAAGATTT  
TAATTGGACCATGGGCAACGTTAAAATTGCTCTCTCTGCATGTGTTTAGTATTTGCATT  
CTGGCATCTTGTGAGAATCGAAGTTGCCGGAGAATTTCCAGTGTGTGTAGTGGAGGGAG  
AATATGATGAGCATGGCAATGCATGGATGAACCTGATACTGCCCTTTTCAGATTCTCTCA  
AACTGAGATTAATGTGA

## CDS

## > ONAC094

[illegible]

GAAGCAAAGCAAAAGGGAGAGACAGAAAAAGAAAAAGGAGAGGAAAAACAAAGTTTCTCA  
AGATACACATTTGCCAAGAAATATTCCATGAACAAGGAACTCTAAAGATTTCTAGTATT  
TTGCATTCTGGCATCTTGTGCAGAAATCGAAGTTGCCGGAGAATTTCCCAGTGTGTGTAGTG  
GAGGGAGAATATGATGAGCATGGCAATGCATGGATGAACCTGATACTGCCCTTTTCAGAT  
TCCTCCAAACTGAGATTAATGTGA

Protein

> **ONAC094**

MDGVVAEDQAGSGSGHRRLIGSRIEEHRKYMSEESCCPRCGHKIDRKLDWVGLPAGVKF  
DPTDQELIEHLEAKVRPGGEAAAHPLIDEFIPTIEGEDGICYTHPEKLPGVSKDGLSRHF  
FHRPSKAYTTGTRKRRKIQPPAAAASSGGGGGNASSSSASAAAVARHGHQQQQQQQR  
ETRWHKTGKTRAVVGGGRQRGCKKILVLYTNFGKHKRPEKTNWVMHQYHLGEAEEERDGE  
LVVSKIFYQTQPRQCAAADAAATASASAVDRRTTSLRDRAAAAAAAAAAAAAAPMASANVS  
AAFHGAAGIDEFSAQFRSSFEEAGMGASSSDHQSAMVDQRRRQQQHDDDEHDHRRGGG  
GHYVGGQQQVAATFHVVSSPADPIARLMSPPPAHQGTVMRLRQPEPPYIYHHQEDERPHQ  
PRKFDGRSTSGSGLLEEVIMGCTSRRSKGGTSGGKDGTEWQYPSFWPSDSQDHHGDKDDI  
EAKQKGETEKEKGEEKQSFSRYTFAKKYSMNKETLKISSLHSGILSESKLPENFPVCVV  
EGEYDEHGNAWMNLILPFSOSSKLRML\*

Gene Structure

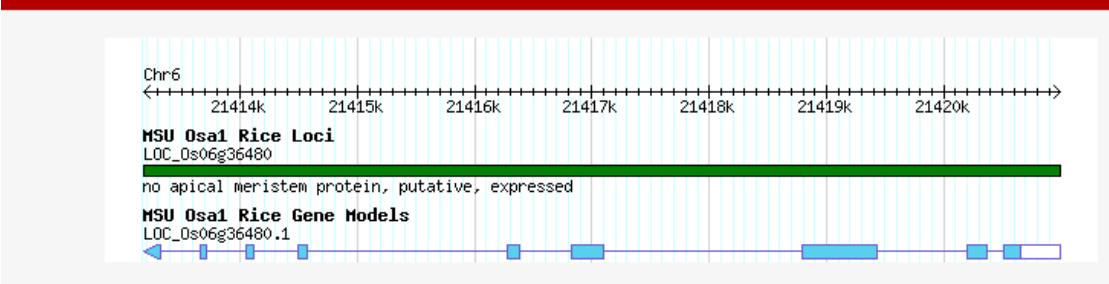

**LOC\_Os06g51070(ONAC095) sequence information**

**Genomic sequence length:** 1047 nucleotides

**CDS length:** 879 nucleotides

**Protein length:** 292 amino acids

Genomic Sequence

> **ONAC095**

ATGGAGCAGCAGCGGAGCAGGTCGACGGCGGCAGGAGGAGAGGTGGAGGTGGAGCAGCTG  
CCGGGATTACAGTTCCATCCGACGGAGGAGGAGCTGCTGGAGTTCTACCTGAAGCAGGTG  
GTGCAGGGGAAGAAGCTCAAGTTCGACATCATCCCCACCGTCCACCTCTACCGCCACGAC  
CCGCGCGAGCTCCCCGACTCGCCCGCATCGGCGAGCGCGAGTGGTACTTCTTCGTCCCC  
CGCGACCGCAAGCAGGCCACCGGCGCGGCGGCGGCGGTAGGCCAGCCGCACCACGGAG  
CGCGGCTTCTGGAAGGCCACCGGCTCCGACCGCGCCATCCGCTGCGCCGCCGACCCCAAG  
CGCTCATCGGCCTCAAGAAGACGCTCGTCTACTACGAGGGCCGCGCCCTCGCGGCACC  
AAGACCGACTGGGTATGAACGAGTACCGCTCCCCGACGCCGCCCATTCCTGACACC  
ATGCAATTGCAAATGCAACACGACGACATGGTGCTCTGCAAGGTCTACCGGAAGGCGGTC

TCCCTCAAGGAGCTGGAGCAGAGGGTCGCCATGGAGGAGCTTGACGCTCCACCACGTCC  
 TCCGGCACCCACAACACCGGCTCGCCCCCTGCAGCAGGACTCCTCCTCCATCTCCATCTCC  
 TCCTCCTCGGACGCCATGAAGAAAAGAGTGGTGGGGGTGGATGAGGCGTCGGCGGCGGCG  
 CATGAGCTGGTCCGCCCCGGCGACGCTGAGCCTGCCGCAGCTGGAGGTGGCGAGGCCGAG  
 AGCGGGCTGGAGTGGATGCAGGAGCCATTCCTGACGCAGCTGCGGAGCCCATGGATGGAG  
 ACCTGGTCGCCCTACTACGCCAGCGTCCTCAACTTCTGATTACGTACTCTTACCTCATTA  
 AATCACTGCTATGTACTTAGTAGTTAATTCATTACAAAAGAATTACACTACTACTCTTTC  
 TATGAAATGATCATGATCAGAGAGCTCGATCGATCATCAGTTTATTAATTAATTATGACC  
 CCCGGTGCATGGTTTTGCAGCTTAATT

CDS

> **ONAC095**

ATGGAGCAGCAGCGGAGCAGGTGACGGCGGCAGGAGGAGAGGTGGAGGTGGAGCAGCTG  
 CCGGGATTACAGGTTCATCCGACGGAGGAGGAGCTGCTGGAGTTCTACCTGAAGCAGGTG  
 GTGCAGGGGAAGAAGCTCAAGTTCGACATCATCCCCACCGTCCACCTCTACCGCCACGAC  
 CCGCGCAGACTCCCCGACTCGCCCGCATCGGCGAGCGCGAGTGGTACTTCTTCGTCCCC  
 CGCGACCGCAAGCAGGCCACCGGCGGCGGCGGCGGCGGTAGGCCAGCCGCACCACGGAG  
 CGCGGCTTCTGGAAGGCCACCGGCTCCGACCGCGCCATCCGCTGCGCCGCGGACCCCAAG  
 CGCTCATCGGCCTCAAGAAGACGCTCGTCTACTACGAGGGCCGCGCCCCCTCGCGGCACC  
 AAGACCGACTGGGTTCATGAACGAGTACCGCCTCCCCGACGCCGCCGCGCCATTCCCGACACC  
 ATGCAATTGCAAATGCAACACGACGACATGGTGCTCTGCAAGGTCTACCGGAAGGCGGTC  
 TCCCTCAAGGAGCTGGAGCAGAGGGTCGCCATGGAGGAGCTTGACGCTCCACCACGTCC  
 TCCGGCACCCACAACACCGGCTCGCCCCCTGCAGCAGGACTCCTCCTCCATCTCCATCTCC  
 TCCTCCTCGGACGCCATGAAGAAAAGAGTGGTGGGGGTGGATGAGGCGTCGGCGGCGGCG  
 CATGAGCTGGTCCGCCCCGGCGACGCTGAGCCTGCCGCAGCTGGAGGTGGCGAGGCCGAG  
 AGCGGGCTGGAGTGGATGCAGGAGCCATTCCTGACGCAGCTGCGGAGCCCATGGATGGAG  
 ACCTGGTCGCCCTACTACGCCAGCGTCCTCAACTTCTGA

Protein

> **ONAC095**

MEQQRSRSTAAGGEVEVEQLPGFRFHPTEEEELLEFYLKQVVQGKKLKFDI IPTVHLYRHD  
 PRELPGLARIGEREWYFFVPRDRKQATGGGGGGRPSRTTERGFWKATGSDRAIRCAADPK  
 RLIGLKKTLVYYEGRAPRGTKTDWVMNEYRLPDAAPDIPDTMQLMQHDDMVLCVYRKAV  
 SLKELEQRVAMEELARSTTSSGTHNTGSPLQQDSSSISISSSDAMKKEVVGVDASAAA  
 HELVRPATLSLPQLVARPQSGLEWMQEPFLTQLRSPWMETWSPYYASVLNF\*

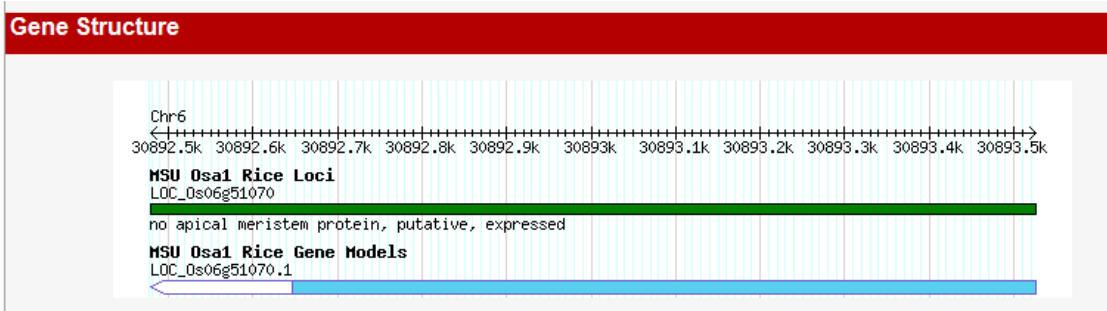

## LOC\_Os07g04560 (ONAC096) sequence information

**Genomic sequence length:** 1904 nucleotides

**CDS length:** 1032 nucleotides

**Protein length:** 343 amino acids

## Genomic Sequence

## > ONAC096

ATGTAAGAGAGGGGTTGTGAAGATGAACCTGGAGCTGGTGATGTGATTCTACGAGGGGTGGAG  
GAGGTAGAAGAGGAAGATGATGATGACCTGGTTCTCCCCGATTCCGGTTCCATCCTACC  
GACGAGGAGCTAGTGACGTTCTACCTTCGCCGGAAGATCGCCGAGAAGCGGCTGAGCATC  
GAGATCATCAAGGAGATGGACATCTACAAGCATGATCCCTCCGACTTCCTCAGTAAGTTC  
ATTCAACTAATTTAAAAGTTCATGATCACCAAATACTTATTAAAGAAAAAAAAAATCACAGCA  
TGCATGCATATATATATGCTTATAGTTCATGGTGATCTACAAGCTCATGCGCTTGGAGCA  
TGATGTTCCCTATCAGCTAAGATTGGGTAGTTTCATTTGCATGCAATAGAATAACATGACA  
GATTTAGTGACCAGGCCCTTGAGTAAATTCAAGAATTAACACATATAATTAACAACATGAA  
TAATATCTATATTTACGTGATTTTTTTTTTGTTCAAACTATAAGCTAGATCGATCATTTCG  
ATCATGAAAAGCTAAATCTTGTGGGGATTAATCAAATTAATTAATTAACCATGTTGATGC  
ATGCAGAGACGAGCACGGTGGGCAGCGAGAAGGAATGGTACTTCTTCTGCCTTCGAGGGA  
GGAAGTACAGGAACAGCATCCGACCCAACCGGGTCACCGGCTCCGGCTTCTGGAAGGCCA  
CCGGAATCGACCGCCCAATCTGCTCTGCCGCCGGCGGGCGGGCGGGCGGCGACTGCATCGGCC  
TCAAGAAGTCGCTCGTCTACTACCGCGGCAGCGCCGGCAAGGGCACCAAGACCGACTGGA  
TGATGCACGAGTTCGGCCTCCCTCCGCCGCCCGCCGACGACCTCGCCGCCGGCGGCTCCT  
CCCCCTCCTCCGAGCTCCAAGAAGCGGTAAGTTAATTACCAATATTTTAAATAGCGTGCT  
AAGACATTACTAGCGTTACTCTCTTTGTTCATAATATAAGGGATTTTGAGTAGATGTG  
ACACATCCTAATAACAATAAATCTGGACAGATACTAGAATGTGTGCATCAACATAAAATC  
CCTTATATTATTGGACGGAGGGAGTAGCTTCTTAGATAGATATAGCGGCGGGTTAAGTAG  
AACTATAGCGACTAAATTATATATGAGAGTAAATAATTAGTTAAAACCCCTTCTCAAATAG  
CTATAGCGGGATATTTAAAACCTGTTAATTACATGCATCTTCTTCATCTCCGGCGACGTC  
GCCGTCGATCGGCCATTGCATGCACTTTCCCGCGAACCCGGCTTGGTTCCATTACACAGT  
GCGTGGAACAGTGGCGTGACGCACTGACACGTGTCTCGAACGTGCCGAAATGTTAGCA  
CGACGACGAACTGAACTTTTGTGTGTGCGTGAAAAAAATGCAGGAAGTTTGGACCATCT  
GCCGAATCTTCCAGAGGAACATCACCCACAAGAAGCAGCCGCAGCCGCAGCTCGCCGTCG  
CCGCCGCCGCGGTGCCGGCGCCGGTGCCGGACGCGACGAGCTCGATCACCGGCAGCCTCG  
AGTCCGACAGCGCCGGCGACGACGTCGTGAGTACATGAACACCTCCAGCCGCCGCCGG  
CGAGCAACGTGAACGGTGGCTACAGCAACCAGCGCTACTTCCAGGAGCAATGGAACAGTA  
GCAGCAATGATAATACCACAGTGTTCATCAGCATGCGGCGGGCGGCCACCGCCGGAGC  
CTTCGCCGGCGACGGCGATGGCCGATTGGGCCATGATCAGAGCGTTCTCAGCTCGCCGG  
CGCCGAGCGATTTCTACTACAAGGATGGATGCAACGATGACATTTACAGGATGGTGATGG  
AGCTCGCCGATCCGAGCTTGTTCTATGATCATATATATGCTTAA

CDS

## > ONAC096

ATGAAGAGGGGTTGTGAAGATGAACTTGGAGCTGGTGATGTGATTCTACGAGGGGTGGAG

GAGGTAGAAGAGGAAGATGATGATGACCTGGTTCTCCCCGGATTCCGGTTCCATCCTACC  
GACGAGGAGCTAGTGACGTTCTACCTTCGCCGGAAGATCGCCGAGAAGCGGCTGAGCATC  
GAGATCATCAAGGAGATGGACATCTACAAGCATGATCCCTCCGACTTCCTCAAGACGAGC  
ACGGTGGGCAGCGAGAAGGAATGGTACTTCTTCTGCGCTTCGAGGGAGGAAGTACAGGAAC  
AGCATCCGACCCAACCGGTCACCGGCTCCGGCTTCTGGAAGGCCACCGGAATCGACCGC  
CCAATCTGCTCTGCCGCCGGCGGGCGGGCGGGCGGCGACTGCATCGGCCTCAAGAAGTCGCTC  
GTCTACTACCGCGGCAGCGCCGGCAAGGGCACCAAGACCGACTGGATGATGCACGAGTTC  
CGCCTCCCTCCGCCGCCCGCCGACGACCTCGCCGCCGGCCGCTCCTCCCCTCCTCCGAGC  
CTCCAAGAAGCGGAAGTTTGGACCATCTGCCGAATCTTCCAGAGGAACATCACCACAAG  
AAGCAGCCGCAGCCGCAGCTCGCCGTCGCCGCCGCCGCGGTGCCGGCGCCGGTGCCGGAC  
GCGACGAGCTCGATCACCGGCAGCCTCGAGTCCGACAGCGCCGGCGACGACGTCGTCGAG  
TACATGAACACCCTCCAGCCGCCGCCGGCGAGCAACGTGAACGGTGGCTACAGCAACCAG  
CGCTACTTCCAGGAGCAATGGAACAGTAGCAGCAATGATAATACCACAGTGTTTCATCAG  
CATGCGGCGGGCGGCCACCGCCGAGCCTTCGCCGGCGACGGCGATGGCCGGATTCCGGC  
CATGATCAGAGCGTTCTCAGCTCGCCGGCGCCGAGCGATTTCTACTACAAGGATGGATGC  
AACGATGACATTTACAGGATGGTGATGGAGCTCGCCGATCCGAGCTTGTTCTATGATCAT  
ATATATGCTTAA

## Protein

> **ONAC096**

MKRGCEDELGAGDVILRGVEEVEEEDDDDLVLPGRFRHPTDEELVTFYLRRKIAEKRLSI  
EIIKEMDIYKHDPDFLKTSTVGSEKEWYFFCLRGRKYRNSIRPNRV TSGSGFWKATGIDR  
PICSAAGGGGGDCIGLKKSLVYYRGSAGKGTCTDWMHEFRLPPPADDLAAGRSSPPPS  
LQEAEVWTICRIFQRNITHKKQPQQLAVAAAAVPAPVPDATSSITGSLESDSAGDDVVE  
YMNTLQPPPASNVNGGYSNQRYFQEQWNSSSNDNTTVFHQHAAAAAPPEPSPATAMAGFG  
HDQSVLSSPAPSDFYKDGKNDDIYRMVMELADPSLFYDHIYA\*

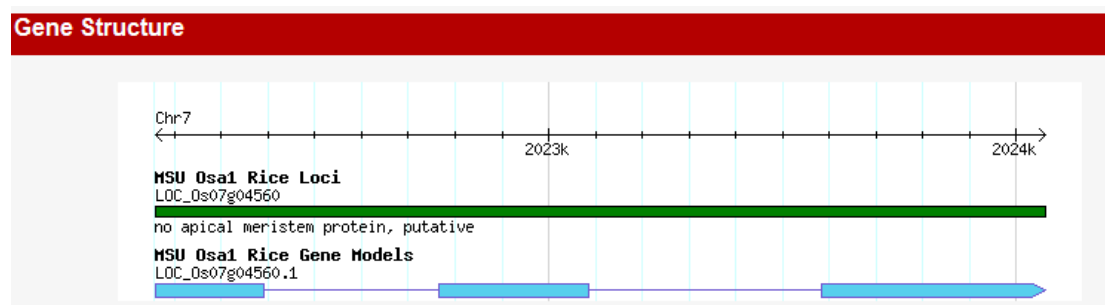

### LOC\_Os07g09740 (ONAC097) sequence information

**Genomic sequence length:** 1995 nucleotides

**CDS length:** 1995 nucleotides

**Protein length:** 664 amino acids

## Genomic Sequence

> **ONAC097**

ATGGCGTCGGCGGCTGGAGATGGGCTCCCTCCGGGGCTCAAGTTCGAGCCCAAGGACGAC  
GAGCTCGTCGCGCGCTTCTCTCTCGCGCGCATCCAGGGTAAGCCCCCTCCCTCTCCACGGC

GTCATCCTCGACGCTGATCCCCCTCTGCGCGCCGCCATGGAGGCTTCTTGCGGATCATGGC  
 AGGGGCGATGAGGCGTTCTTCTTCGCCCACGCGCGGGCCAAGAATGGGAAGGGGAGCCGG  
 CAGAAGCGCACGGTCGAGGGCGGAGGGTACTGGCAGGGGCAGAGGATGTGCGTCGATGGT  
 GAGAGGCTGGTCGTCCCCGATGGCGGCTTGGAGATCGCGTGGCGCAAGTACGTCCTCAGC  
 TACTTCGCGGATGGCGAGAAGGGGAGCTCGGGGTGGGTGATGCACGAGTACGCCATCACG  
 ACGCCGGCTGACCTCGCGTCGTCGACGATGCGGGCTGTATCGCATCCGGTTCAGCGGCCAC  
 GGCAAGAAGCGCAAGAGGGAACCGGAATCTCAGAGCGCCCACCACGACGACGGTCGAGCG  
 CGCTGCGCCCCACAGATAGCCATGCCCCGAGACTGCTCTGCTCGAGGACAGCGCCCCGCCG  
 CCACAGCCCGTTCTTCTCCTGCTGCGGTGGTGAACCTCTGTCTCTGATGGCGCCGTTCCT  
 CCTCTGCACCGGTGGTGAACCTGTGACTCTGACGTCACCGATGAGGATGAGTTGCAGAGC  
 TTTGTGCTGAGTTCTCCGCGCGCAACCTGTTCTGCTCTTTGCCACAAGGAAGCCATGAA  
 GCTGAAGCGGACGTAGTTGGTGGCGCATTGCCGGCGCAATCTATGTCGTCGTTTGCTGAT  
 GTTGAGGTCCAGAGAACATGGATGACCAGAGCTGCTCCGGCGTGGTGTTCGTAATCTT  
 TCCGACCTGATCGTCTTACCACCGGTGGAAGCCAGTGGCGCAGCACCCGCGCCATCTTGG  
 GCGTCATCGCTGGACAATCAAAACGACGAGGCGCCTGTGTTCTTTGAGTTTCCAGAGAGC  
 ATGGATGACATTATTGGCTGCTTTGACTTCGCCACCATGGACACCCGAGCTGCACTAGC  
 GCCATATCAGAGGAGCCCTTTCTTCTCCTGCAGCAATGGTGAACCATGACGATGGCTAT  
 GCCTCTGACAACGCCGATCAAGGTTGCTCCGGCGCCGTTCCTCTTCTTCAGCAGTGGTG  
 GACCTTCCCAATGAGACTGACGGCGCCGATCAAAGCTGCTCCGGCGTGGTGGACGATTCA  
 TCCATGGTGTTCGTAATATTACCCCGTTGGAATCTCCAGCAGAAGGTGGCCATGAAGCC  
 GAAGCCGGTGCCGGGGGTGGCCGTGCAGCACCAGCGCCGTCTTGGGTGTCATCGCTGGAC  
 AACCAAAACGACGAGGCGCCAATGTTCTTCGAGCTTCCAGAGAGCCTGGATGACATGGTT  
 AGCTGCTTTGACTTTGCCGCCATGGATGGCCAGAGCTGCACTAGCGCCGTGTCAGAGACT  
 GCTCTGATCGAGGAGCTCGTTCTTCTCCTGCAGCAATGGTGAACCATCACGATGACTCT  
 GTCTCTGACATCGCCGATCATGGCTGCTCCGGCGCCGCTCCTCTCCTTCAGCAGTGGTG  
 GACCTCCCCGATGACTCTGACGGCGCCGATCAGAGCTGCTCCGGCATGGTGGATGATTCC  
 CTTCCCGGGTACTATGAGGCTGAGCTGAAGGTTCCGCTTGAGTACGCCGCGCGCAATCCG  
 GTCGACTCTCCCTCAAAAGGCGGCCATGACCATGAAGCCGAAGTCGACGCCAGTGGTGGT  
 GCAGGGTCCATGATGTCATCGCCGACAAGGAGAAGGAGCACTCCTCATCGGGCGTCATG  
 GACGTGGAGGCCACTGGTTTTGGAGTTCCAGACAGCATGGATGGCCTGAGCTGCATCGAC  
 TTCGCCGAGACGATGGACGACCTGAGCTGCATCGACTTCACCATTGATGATGAGCTGTTC  
 GATCTATGGAGCTAG

CDS

# > **ONAC097**

ATGGCGTCGGCGGCTGGAGATGGGCTCCCTCCGGGGCTCAAGTTCGAGCCCAAGGACGAC  
 GAGCTCGTCGCCCGCTTCTCCTCGCGCGCATCCAGGGTAAGCCCCCTCCCTCTCCACGGC  
 GTCATCCTCGACGCTGATCCCCCTCTGCGCGCCGCCATGGAGGCTTCTTGCGGATCATGGC  
 AGGGGCGATGAGGCGTTCTTCTTCGCCCACGCGCGGGCCAAGAATGGGAAGGGGAGCCGG  
 CAGAAGCGCACGGTCGAGGGCGGAGGGTACTGGCAGGGGCAGAGGATGTGCGTCGATGGT  
 GAGAGGCTGGTCGTCCCCGATGGCGGCTTGGAGATCGCGTGGCGCAAGTACGTCCTCAGC  
 TACTTCGCGGATGGCGAGAAGGGGAGCTCGGGGTGGGTGATGCACGAGTACGCCATCACG  
 ACGCCGGCTGACCTCGCGTCGTCGACGATGCGGGCTGTATCGCATCCGGTTCAGCGGCCAC  
 GGCAAGAAGCGCAAGAGGGAACCGGAATCTCAGAGCGCCCACCACGACGACGGTCGAGCG  
 CGCTGCGCCCCACAGATAGCCATGCCCCGAGACTGCTCTGCTCGAGGACAGCGCCCCGCCG

CCACAGCCCGTTCTTCCTCCTGCTGCGGTGGTGAACCTCTGTCTCTGATGGCGCCGTTCCCT  
 CCTCCTGCACCGGTGGTGAACCTGTGACTCTGACGTCACCGATGAGGATGAGTTGCAGAGC  
 TTTGTGCTGAGTTCTCCGCGCGCAACCTGTTTCGTCTCTTTGCCACAAGGAAGCCATGAA  
 GCTGAAGCGGACGTAGTTGGTGGCGCATTGCCGGCGCAATCTATGTCGTCGTTTGCTGAT  
 GTTGAGGTCCAGAGAACATGGATGACCAGAGCTGCTCCGGCGTGGTGTGTTGCTAATCTT  
 TCCGACCTGATCGTCTTACCACCGGTGGAAGCCAGTGGCGCAGCACCCGCGCCATCTTGG  
 GCGTCATCGCTGGACAATCAAAACGACGAGGCGCCTGTGTTCTTTGAGTTTCCAGAGAGC  
 ATGGATGACATTATTGGCTGCTTTGACTTCGCCACCATGGACGACCCGAGCTGCACTAGC  
 GCCATATCAGAGGAGCCCTTTCTTCCTCCTGCAGCAATGGTGAACCATGACGATGGCTAT  
 GCCTCTGACAACGCCGATCAAGGTTGCTCCGGCGCCGTTCTCTTCCTTCAGCAGTGGTG  
 GACCTTCCCAATGAGACTGACGGCGCCGATCAAAGCTGCTCCGGCGTGGTGGACGATTCA  
 TCCATGGTGTGTTGCTAATATTCACCCGTTGGACTCTCCAGCAGAAGGTGGCCATGAAGCC  
 GAAGCCGGTGCCGGGGGTGGCCGTGAGCACCAGCGCCGTCTTGGGTGTCATCGCTGGAC  
 AACCAAAACGACGAGGCGCCAATGTTCTTCGAGCTTCCAGAGAGCCTGGATGACATGGTT  
 AGCTGCTTTGACTTTGCCGCCATGGATGGCCAGAGCTGCACTAGCGCCGTGTCAGAGACT  
 GCTCTGATCGAGGAGCTCGTTCTTCCTCCTGCAGCAATGGTGAACCATCACGATGACTCT  
 GTCTCTGACATCGCCGATCATGGCTGCTCCGGCGCCGCTCCTCCTCCTTCAGCAGTGGTG  
 GACCTCCCCGATGACTCTGACGGCGCCGATCAGAGCTGCTCCGGCATGGTGGATGATTCC  
 CTTCCCGGGTACTATGAGGCTGAGCTGAAGGTTCCGCTTGAGTACGCCGCGCGCAATCCG  
 GTCGACTCTCCCTCAAAAAGCGGCCATGACCATGAAGCCGAAGTCGACGCCAGTGGTGGT  
 GCAGGGTCCATGATGTCATCGCCGGACAAGGAGAAGGAGCACTCCTCATCGGGCGTCATG  
 GACGTGGAGGCCACTGGTTTTTGGAGTTCCAGACAGCATGGATGGCCTGAGCTGCATCGAC  
 TTCGCCGAGACGATGGACGACCTGAGCTGCATCGACTTCACCATTGATGATGAGCTGTTG  
 GATCTATGGAGCTAG

#### Protein

#### > **ONAC097**

MASAAGDGLPPGLKFEPKDDELVARFLLARIQGKPLPLHGVILDADPLCAPPWRLADHG  
 RGDEAFFFADARAKNGKGSRQKRTVEGGGYWQGQRMCDGERLVVPDGGLEIAWRKYVLS  
 YFADGEKGSSGWMHEYAITTPADLASSTMRLYRIRFSGHGKKRKREPESQSAHHDDGRA  
 RCAPQIAMPETALLED SAPPPQPVLPAAVNSVSDGAVPPPAPVVNCDSDVTDEDELQS  
 FVPEFSARNLFVSLPQGSHEAEADVGGALPAQSMSSFADVGGPENMDDQSCSGVVFANL  
 SDLIVLPPEASGAAPAPSWASSLDNQNDEAPVFFEFPEMDDIIGCFDFATMDDPSCTS  
 AISEEPFLPPAAMVNHDDGYASDNADQGC SGAVPLPSAVVDLPNETDGADQSCSGVVDSDS  
 SMVFANIHPLDSPAEAGGHEAEAGAGGGRAAPAPSWVSSLDNQNDEAPMFFELPESLDDMV  
 SCFDFAAMDGQSCTSAVSETALIEELVLPPAAMVNHDDSVSDIADHGC SGAAPPSAVV  
 DLPDDSDGADQSCSGMVDDSLPGYYEAE LKVPLEYAARNPVDSPSKGGHDHEAEVDASGG  
 AGSMSSPDKEKEHSSSGVMDVEATGFGVPDSMDGLSCIDFAETMDDLSCIDFTIDDELFDLWS\*

## Gene Structure

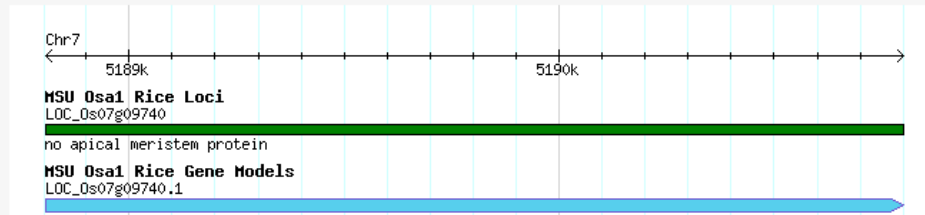

## LOC\_Os07g09830 (ONAC098) sequence information

**Genomic sequence length:** 2121 nucleotides

**CDS length:** 2121 nucleotides

**Protein length:** 706 amino acids

## Genomic Sequence

## &gt; ONAC098

ATGGCGGCGGCGGCTGGAGATGGGCTCCCGCCGGGGCTCAGGTTTCGAGCCCAAGGACGAC  
GAGCTCGTCGCCCCGCTTCCTCCTCGCGCGCATCCAGGGTAAGCCCCCTCCCTCTCCATGGC  
GTCATCCTCGACGCCGATCCCCCTCTGCGCGCCGCCATGGAGGCTTCTTGCGGATCATGGC  
AGGGGCGACGACGCGTTCTTCTTCGCCGAGGCGCGGGCCAAGAACGGCAAGGGGAGCCGG  
CAGAAGCGCACGGTCGAGGGCGGAGGGTACTGGCAGGGGCAGAGGATGTGCGTCGATGGT  
GAGAGGCTGGTCGTCCCCGATGGTGGCGGCGGCGGCGGCGTGGAGATCGCGTGCGCAAG  
TACGTGCTCAGCTACTTCGCGGATGGCGAGAAGGGGAGCTCGGGGTGGGTGATGCACGAG  
TACGCCATCACGGCGCCGGCTGACCTCGCGTCGTCGACGACGCGGCTGTATCGCATCCGG  
TTCAGCGGCCACGGCAAGAAGCGCAAGAGGGAACCGGAATCTCAGAGCGACAACCACCAG  
ATCGCAGTGGCGGAGACTGCTATGCTCGAGGACAGCGCGCCGCCACAGCCGGTTCAT  
CCTCCTGCAGCGATGGTGAAGTGTGTCTCTGACGACACCGATCAGGGCTTCTCCGGTGCC  
GTTCTCCTCCTGCACCGGTGGTGACCATAACCAATGACTCTGACGTCACCGATCGATAC  
TCTTCCCTGGTGTTCTCTGATCAACCCGGGTCAATCTATGAGGATGAGTTGCAGAGCTTT  
GTGCCTGAGTTCCCCGCTCGCAACCTGTTTCGTCTCTTTGCCAGAAGGAAGCCATGAAGCT  
GAACCGGCGCAATCTGTGTCGTCGTTAGCTGATGTTGGAGGTCCAGAGAACATGGATGAT  
CAGAGCTGCTCCGGCGTGGTGTGTTGCTAATCTTCCCGAGCTGATCGTCTTGCCATCGGCG  
CCATCGCTGGACAATCAAAAACGACGAGGCGCCAGTGTTCTTTGAGTTTCCAGAGAGCATG  
GATGACATTGTTGGCTGCTTTGACTTCGCCGCCATGGACAACCAGAGCTGCACTAGCGCC  
ATACCAGAGGAGCCCTTTCTTCCTCCTGCTGCAATGGTGAACCATGACGATGGCTATGCC  
TCTAACAACGCCGATCAAGGTTGCTCCGGCGCCTTTCTCTTCCTGCAGCAGTGGTGGAC  
CTTCCCAATGAGACTGACGGCGCCGATCAGAGCTGCTCTGGCGTGGGGGACAACCTTACC  
CTGTTGTTTTCTGATGTTACCGGGTCAATCGATGAGGATGAGCTGCAGAGTTTTGTGCCT  
GAGTTCGCCGCGAGCAACCTGTTTCGTCTCTCTGCCACAAGGAAGCTGTGAAGCTGATGCT  
GAAGCTGACAGCGGTGGTGGCGTAGCGCCGGCGCAGTTTGCTGAATTTGGAGGTTTCAGAG  
AGCATGGATGATTCTTCATGATGTACCCGTTGAACTTTCCAGCAGAAGCCGGTGGCGGC  
GGTGGCCGTGCAGCACCGGCATCGTCTTGGGTGTCATCGCAGCACAACCAAAATGATGAG  
GCGCCAATGTTCTTCGAGCTTCCAGAGAGCCTGGATGACATGGTTGGCTGCTTTGACTTT  
GCCGCCATGGATGGCCAGAGCTGCACTAGCGCCGTGTCAGAGACTGCTCTGATCGAGGAG



CTCGTTCTTCCTCCTGCAGCAATGGTGAACCATCACGATGACTCTGTCTCTGACATCGCC  
 GATCATGGCTGCTCCGGCTCCGTTCCCTCCTCCTTCAGCAGTGGTGGACCTCCCCAATGAC  
 TCTGATCAGAGCTGCTCCGGGTACTATGAGGCTGAGCTGAAGGTTCCACTTGAGTACGCC  
 GCGCGCAATCCGGTCGACTCTCCCGCAAAAGGCGGCAATGAAGCCGAAGTTGACGCCAGC  
 AATGGTGCAGGGTCCATGATGTCGTCGCCGGACAAGCAGAAGGAGCACTCCTCATCGGGC  
 GTCATGGACGTGGAGGCTATTGGTTTTGGAGTTCCAGACAGCATGGATAGCCTGAGCTGC  
 ATCGACTTCGCCGAGACAATGGACGACCTGAGCTGCATCGACTTCACCATTGATGATGAG  
 CTGTTTCGATCTATGGAGCTAG

CDS

> **ONAC098**

ATGGCGGCGGCGGCTGGAGATGGGCTCCCGCCGGGGCTCAGGTTTCGAGCCCAAGGACGAC  
 GAGCTCGTCGCCGCTTCCTCCTCGCGCGCATCCAGGGTAAGCCCCCTCCCTCTCCATGGC  
 GTCATCCTCGACGCCGATCCCCCTGCGCGCCGCCATGGAGGCTTCTTGCGGATCATGGC  
 AGGGGCGACGACGCGTTCTTCTTCGCCGAGGCGCGGGCCAAGAACGGCAAGGGGAGCCGG  
 CAGAAGCGCACGGTCGAGGGCGGAGGGTACTGGCAGGGGCAGAGGATGTGCGTCGATGGT  
 GAGAGGCTGGTTCGTCGCCGATGGTGGCGGCGGCGGCGGCGTGGAGATCGCGTGCGCAAG  
 TACGTGCTCAGCTACTTCGCGGATGGCGAGAAGGGGAGCTCGGGGTGGGTGATGCACGAG  
 TACGCCATCACGGCGCCGGCTGACCTCGCGTCGTCGACGACGCGGCTGTATCGCATCCGG  
 TTCAGCGGCCACGGCAAGAAGCGCAAGAGGGAACCGGAATCTCAGAGCGACAACCACCAG  
 ATCGCAGTGGCGGAGACTGCTATGCTCGAGGACAGCGCGCCGCCACAGCCGGTTCAT  
 CCTCCTGCAGCGATGGTGAACCTGTGTCTCTGACGACACCGATCAGGGCTTCTCCGGTGCC  
 GTTCCTCCTCCTGCACCGGTGGTGACCATAACCAATGACTCTGACGTCACCGATCGATAC  
 TCTTCCCTGGTGTTCTCTGATCAACCCGGGTCAATCTATGAGGATGAGTTGCAGAGCTTT  
 GTGCCTGAGTTCCCCGCTCGCAACCTGTTTCGTCTCTTTGCCAGAAGGAAGCCATGAAGCT  
 GAACCGGCGCAATCTGTGTCGTCGTTAGCTGATGTTGGAGGTCCAGAGAACATGGATGAT  
 CAGAGCTGCTCCGGCGTGGTGTGTTGCTAATCTTCCCGAGCTGATCGTCTTGCCATCGGCG  
 CCATCGCTGGACAATCAAAACGACGAGGCGCCAGTGTTCTTTGAGTTTCCAGAGAGCATG  
 GATGACATTGTTGGCTGCTTTGACTTCGCCGCCATGGACAACCAGAGCTGCACTAGCGCC  
 ATACCAGAGGAGCCCTTTCTTCCTCCTGCTGCAATGGTGAACCATGACGATGGCTATGCC  
 TCTAACAACGCCGATCAAGGTTGCTCCGGCGCCTTTCTCTTCTCCTGCAGCAGTGGTGGAC  
 CTTCCCAATGAGACTGACGGCGCCGATCAGAGCTGCTCTGGCGTGGGGGACAACCTTACC  
 CTGTTGTTTTCTGATGTTACCGGGTCAATCGATGAGGATGAGCTGCAGAGTTTTGTGCCT  
 GAGTTCGCCGCGAGCAACCTGTTTCGTCTCTCTGCCACAAGGAAGCTGTGAAGCTGATGCT  
 GAAGCTGACAGCGGTGGTGGCGTAGCGCCGGCGCAGTTTGCTGAATTTGGAGGTTCCAGAG  
 AGCATGGATGATTCTTCCATGATGTACCCGTTGAACTTTCCAGCAGAAGCCGGTGGCGGC  
 GGTGGCCGTGCAGCACCGGCATCGTCTTGGGTGTCATCGCAGCACAACCAAAATGATGAG  
 GCGCCAATGTTCTTCGAGCTTCAGAGAGCCTGGATGACATGGTTGGCTGCTTTGACTTT  
 GCCGCCATGGATGGCCAGAGCTGCACTAGCGCCGTGTCAGAGACTGCTCTGATCGAGGAG  
 CTCGTTCTTCCTCCTGCAGCAATGGTGAACCATCACGATGACTCTGTCTCTGACATCGCC  
 GATCATGGCTGCTCCGGCTCCGTTCCCTCCTCCTTCAGCAGTGGTGGACCTCCCCAATGAC  
 TCTGATCAGAGCTGCTCCGGGTACTATGAGGCTGAGCTGAAGGTTCCACTTGAGTACGCC  
 GCGCGCAATCCGGTCGACTCTCCCGCAAAAGGCGGCAATGAAGCCGAAGTTGACGCCAGC  
 AATGGTGCAGGGTCCATGATGTCGTCGCCGGACAAGCAGAAGGAGCACTCCTCATCGGGC  
 GTCATGGACGTGGAGGCTATTGGTTTTGGAGTTCCAGACAGCATGGATAGCCTGAGCTGC

ATCGACTTCGCCGAGACAATGGACGACCTGAGCTGCATCGACTTCACCATTGATGATGAG  
CTGTTTCGATCTATGGAGCTAG

Protein

> **ONAC098**

MAAAAGDGLPPGLRFEPKDELVARFLLARIQGKPLPLHGVILDADPLCAPPWRLADHG  
RGDDAFFFAEARAENGKGSRQKRTVEGGGYWQGQRMCDGERLVVPDGGGGGGVEIAWRK  
YVLSYFADGEKGSSGWMHEYAITAPADLASSTRLYRIRFSGHGKKRKREPESQSDNHQ  
IAVAETAMLEDSAPPPQPVHPPAAMVNCVSDTDQGFSGAVPPPAPVVHHTNDSVTDTRY  
SSLVFSQPGSIYEDELQSFVPEFPARNLFVSLPEGSHEAEPASVSSLADVGGPENMDD  
QSCSGVVFANLPELIVLPSAPSLDNQNDAPVFFEFPEMDDIVGCFDFAAMDNQSCTSA  
IPEEPFLPPAAMVNHDDGYASNADQGCSGAFPLPAAVVDLPNETDGADQSCSGVGDNST  
LLFSDVTGSIDEDELQSFVPEFAASNLFVSLPQGSCEADAEADSGGGVAPAQFAEFGGSE  
SMDDSSMMYPLNFPAEAGGGGGRAAPASSWVSSQHNQNDAPMFFELPESLDDMVGCFDF  
AAMDGQCTSAVSETALIEELVLPPAAMVNHDDSVSDIADHGCSGSVPPPSAVVDLPND  
SDQSCSGYYEAEKVPLEYAARNPVDSPAKGGNEAEVDASNGAGSMSSPDKQKEHSSSG  
VMDVEAIGFGVPDSMDLSLSCIDFAETMDDLSCIDFTIDDELFDLWS\*

**Gene Structure**

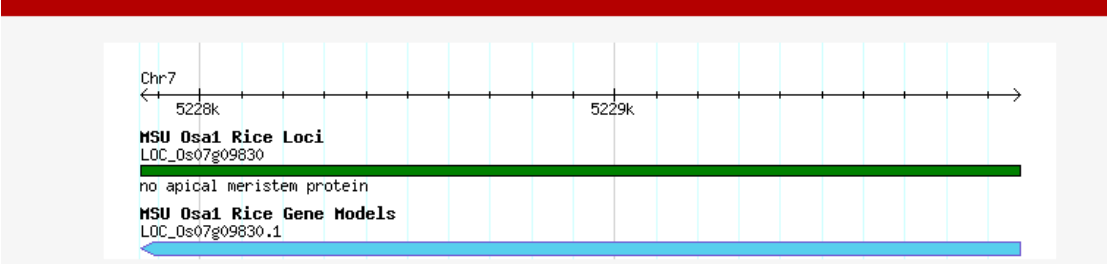

**LOC\_Os07g09860 (ONAC099) sequence information**

**Genomic sequence length:** 2037 nucleotides

**CDS length:** 2037 nucleotides

**Protein length:** 678 amino acids

Genomic Sequence

> **ONAC099**

ATGGCGGCGGCGGCTGGAGATGGGCTCCCGCCGGGGCTCAGGTTTCAGCCCAAGGACGAC  
GAGCTCGTCGCCCCGCTTCCTCCTCGCGCGCATCCAGGGTAAGCCCCTCCCTCTCCACGGC  
GTCATCCTCGACGCCGATCCCCCTCTGCGCGCCGCCATGGAGGCTTCTTGCGGATCATGGC  
AGGGGCGATGACGCGTTCTTCTTCGCCGAGGCGCGGGCCAAGAACGGCAAGGGGAGCCGG  
CAGAAGCGCACGGTCGAGGGCGGAGGGTACTGGCAGGGGCAGAGGATGTGCGTCGATGGC  
GAGAGGCTGGTCGTCCCCGATGGTGGCGGCGGCGGCGCGTGGAGATCGCGTGGCGCAAG  
TACGTCCTCAGTACTTTCGCGGATGGCGAGAAGGGGAGCTCGGGGTGGGTGATGCACGAG  
TACGCCATCACGTCGCCGGCTGACCTCGCCTCGTCGGCGATGCGGCTGTACCGCATCCGG  
TTCAGTGGCCACGGCAAGAAGCGCAAGAGGGAACCGGATTCTCAGAGCGCCACGACGAA  
CACGGTCGAGCGCGCTGCGCCCCACAGATCGCCATGCCCGAGACTGCTCTGCTCGAGGAC

AGCGCGCCGCCACAGCCCGTCCATCCTCCTGCTGCGGTGGTGGACTGTGTCTGTGAC  
 GTCACCGATCAGGGCTCTTCCCTGGTGTTCCTGATCAACCCGGGTCAATCTATGAGGAT  
 GAGTTGCAGAGCTTTGTGCCTGAGTTCGCCGCGCGCAATCTGTTTCGTCTCTTTGCCAGAA  
 GGAAGCCGTGACGTCGTGGCAGAGGCTGCTCTGATCGAGGACTTGGCGCTCTCGCCACAG  
 CCTGTTCTCCTCCTGCAGAGGTGGTGAACCAAGCTGATGACTCCGATGGCGCTGATCAG  
 GGCTGCTCGAGTGTGTTTGCTGCTCTTCCCGACCTGATAGTCTTGCCACCGGAGGAAGCC  
 TGTGGCAGTGGTGGTGCAGCACCGGCGCCGTCTTGGGCATCATCGCTGGACAACCAAAAC  
 GACGACGCACCAGCTTTCTTTGAGTTTCCAGAGAGCATGGATGACATGGTTGGCTGCTTC  
 GACTTCGCCTCCATGGACAACAGAGCTGCACTAGCGCCGTGTCAGAGATTGCTGTGCTC  
 GAGGAGCCCTTTCTTCCCTCCACCTACAATGGTGAACCATGACAATAACTCTGTCTCTGAC  
 GCGCGCGATCAGAGCTGCTTCGGCGTGGGGGACAACTCTACCCTGGTGTTCCTGATCTA  
 ACCGGGTCAATCGATGAGGATGAGCTTCAGAGTTTTGTGCCTGAGTTCGTCTCTTGCCA  
 CAAGGAAGCTGTGAAGCTGATGCTGAAGCTGACAGCGGTGGTGGCGTAGCACCGGCGCAG  
 TTTGCTGAATTTGGAGGTCCAGAGAGCATGGATGACCCGTTGAACTTTCCAGCAGAAGCC  
 AGTGGCGGCGGCGACCGTGCAGCACCGGCATCATCTTGGGTGTCATCGCAGGACAACCAA  
 AATGATGAGGCGCCAATGTTCTTCGAGCTTCCAGAGAGCCTGGATGACATGGTTGGCTGC  
 TTTGACTTTGCCGCCATGGATGGCCAGAGCTGCACTAGCGCCGTGTCAGAGACTGCTCTG  
 ATCGAGGAGCTCGTTCTTCTCCTGCAGCAATGGTGAACCATCACGATGACTCTGTCTCT  
 GACATCGCCGATCATGGCTGCTCCGGCGCCGTTCCTCCTCCTAATTCAGAAGTGGTGGAC  
 CTCCCCAATGACTCTGTGCGGCGCCGATCAGAGCTGCTCCGGCATGGTGGACGATTCTCTT  
 TCCGGGTACTATGAGGCTGAGCTGAAGGACGCCAGCGGTGGTGCAGGGTCCATGATGTCG  
 TCGCCGGACAAGCAGAAGGAGCACTCCTCATCGGGTGTATGGACGTGGAGGCCACTGGT  
 TTTGAGTTCCAGACAGCATGGATGGCTGAGCTGCATCGACTTTGCCGAGACGATGGAC  
 GACCTGAGCTGCATCGACTTCACCATTGATGATGAGTTGTTTGATCTATGGAGCTAG

CDS

> **ONAC099**

ATGGCGGCGGCGGCTGGAGATGGGCTCCCGCCGGGGCTCAGGTTTCAGCCCAAGGACGAC  
 GAGCTCGTCGCCCGCTTCCCTCCTCGCGCGCATCCAGGGTAAGCCCCCTCCCTCTCCACGGC  
 GTCATCCTCGACGCCGATCCCCCTGCGCGCCGCCATGGAGGCTTCTTGCGGATCATGGC  
 AGGGGCGATGACGCGTTCTTCTTCGCCGAGGCGCGGGCCAAGAACGGCAAGGGGAGCCGG  
 CAGAAGCGCACGGTCGAGGGCGGAGGGTACTGGCAGGGGCAGAGGATGTGCGTCGATGGC  
 GAGAGGCTGGTTCGTCGCCGATGGTGGCGGCGGCGGCGGTGGAGATCGCGTGGCGCAAG  
 TACGTCCTCAGCTACTTCGCGGATGGCGAGAAGGGGAGCTCGGGGTGGGTGATGCACGAG  
 TACGCCATCACGTCGCCGGCTGACCTCGCCTCGTCGGCGATGCGGCTGTACCGCATCCGG  
 TTCAGTGGCCACGGCAAGAAGCGCAAGAGGGAACCGGATTCTCAGAGCGCCACGACGAA  
 CACGGTCGAGCGCGCTGCGCCCCACAGATCGCCATGCCCCGAGACTGCTCTGCTCGAGGAC  
 AGCGCGCCGCCACAGCCCGTCCATCCTCCTGCTGCGGTGGTGGACTGTGTCTGTGAC  
 GTCACCGATCAGGGCTCTTCCCTGGTGTTCCTGATCAACCCGGGTCAATCTATGAGGAT  
 GAGTTGCAGAGCTTTGTGCCTGAGTTCGCCGCGCGCAATCTGTTTCGTCTCTTTGCCAGAA  
 GGAAGCCGTGACGTCGTGGCAGAGGCTGCTCTGATCGAGGACTTGGCGCTCTCGCCACAG  
 CCTGTTCTCCTCCTGCAGAGGTGGTGAACCAAGCTGATGACTCCGATGGCGCTGATCAG  
 GGCTGCTCGAGTGTGTTTGCTGCTCTTCCCGACCTGATAGTCTTGCCACCGGAGGAAGCC  
 TGTGGCAGTGGTGGTGCAGCACCGGCGCCGTCTTGGGCATCATCGCTGGACAACCAAAAC  
 GACGACGCACCAGCTTTCTTTGAGTTTCCAGAGAGCATGGATGACATGGTTGGCTGCTTC

GACTTCGCCTCCATGGACAACCAGAGCTGCACTAGCGCCGTGTCAGAGATTGCTGTGCTC  
 GAGGAGCCCTTTCTTCTCCACCTACAATGGTGAACCATGACAATAACTCTGTCTCTGAC  
 GCGCGCATCAGAGCTGCTTCGGCGTGGGGGACAACCTCTACCCTGGTGTCTTCTGATCTA  
 ACCGGGTCAATCGATGAGGATGAGCTTCAGAGTTTTGTGCCTGAGTTCGTCTCTCTGCCA  
 CAAGGAAGCTGTGAAGCTGATGCTGAAGCTGACAGCGGTGGTGGCGTAGCACCGGCGCAG  
 TTTGCTGAATTTGGAGGTCCAGAGAGCATGGATGACCCGTTGAACTTTCCAGCAGAAGCC  
 AGTGGCGGCGGCGACCGTGCAGCACCAGGCATCATCTTGGGTGTCATCGCAGGACAACCAA  
 AATGATGAGGCGCCAATGTTCTTCGAGCTTCCAGAGAGCCTGGATGACATGGTTGGCTGC  
 TTTGACTTTGCCGCCATGGATGGCCAGAGCTGCACTAGCGCCGTGTCAGAGACTGCTCTG  
 ATCGAGGAGCTCGTTCTTCTCCTGCAGCAATGGTGAACCATCACGATGACTCTGTCTCT  
 GACATCGCCGATCATGGCTGCTCCGGCGCCGTTCCTCCTCCTAATTCAGAAGTGGTGGAC  
 CTCCCCAATGACTCTGTGCGGCGCCGATCAGAGCTGCTCCGGCATGGTGGACGATTCTCTT  
 TCCGGTACTATGAGGCTGAGCTGAAGGACGCCAGCGGTGGTGCAGGGTCCATGATGTCG  
 TCGCCGACAAGCAGAAGGAGCACTCCTCATCGGGTGTGATGGACGTGGAGGCCACTGGT  
 TTTGAGTTCCAGACAGCATGGATGGCCTGAGCTGCATCGACTTTGCCGAGACGATGGAC  
 GACCTGAGCTGCATCGACTTCACCATTGATGATGAGTTGTTTGATCTATGGAGCTAG

#### Protein

#### > ONAC099

MAAAAGDGLPPGLRFEPKDELVARFLLARIQGKPLPLHGVILDADPLCAPPWRLADHG  
 RGDDAFFFAEARAKNGKSRQKRTVEGGYWGQQRMCVDGERLVVPDGGGGGGVEIAWRK  
 YVLSYFADGEKGSSGWMHEYAITSPADLASSAMRLYIRFSGHGKKRKREPDSSQSAHDE  
 HGRARCAPQIAMPETALLEDSPAPPQPVHPPAAVDCVCDVTDQGSSLVFPDQPGSIYED  
 ELQSFVPEFAARNLFVSLPEGSRDVVAEALIEDLALSPQPVPPPAEVVNQADDSDGADQ  
 GCSSVFAALPDLIVLPPEEACSGGAAPAPSWASSLDNQNDAPAFFEFPEMDDMVGCF  
 DFASMDNQSCTSAVSEIAVLEEFPLPPPTMVNHDNNSVSDGADQSCFGVGDNSTLVFSDL  
 TGSIDEDELQSFVPEFVSLPQGSCEADAADSGGGVAPAQFAEFGGPESMDDPLNFPAEA  
 SGGGDRAAPASSWVSSQDNQNDAPMFFELPESLDDMVGCFDFAAMDGGQSCTSAVSETAL  
 IEELVLPPAAMVNHDDSVSDIADHGCAGVPPPNSEVVDLPNDVSGADQSCSGMVDDSL  
 SGYYEAEKLDASGGAGSMSSDPKQKEHSSSGVMDVEATGFGVPDSMDGLSCIDFAETMD  
 DLSCIDFTIDDELFDLWS\*

#### Gene Structure

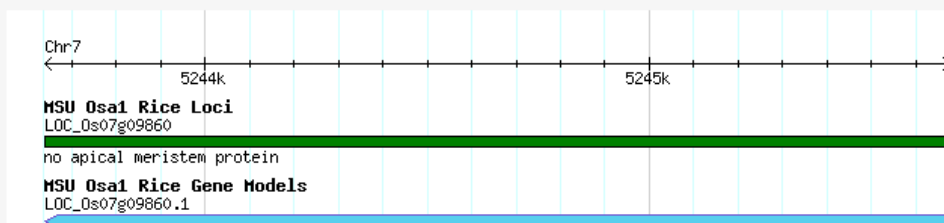

#### LOC\_Os07g13920 (ONAC100) sequence information

**Genomic sequence length:** 1125 nucleotides

**CDS length:** 1125 nucleotides

**Protein length:** 374 amino acids

## Genomic Sequence

> **ONAC100**

ATGGCGGCGGCTGGCGCGGATGGGCTCCCTCCGGGGCTCAGATTGACCCCAGCGACGAC  
 GAGCTCGTCGGCCGGTACCTGCTCCGGCGCCTCCAGGGCCAGCCCCTCCCGCTCGACGGC  
 GTCGTCCTCGATGCCGATCCCCTGAGCGCGCAGCCATGGAGGCTTCTCGCGGATCACGGC  
 CGGGGCGGCGACGAAGCCTTCTTCCTCGCGGAGGCGCACGCCAAGAACGCCAAGGGCAAG  
 CGCCAGAAGCGCACCGTCGAGGGTGGAGGGTTCTGGCAGGGGCAGAGGATGTGCGTCGAC  
 GGCAAGAAGCTGCTCGTCCCCGGCGGCGACGACGGCGGCGGCGGCGGCGAAGTACTGGAG  
 ATCGCGTGGCGCAAGTATGTCTGAGCTTCTTTGCCGAGGGGGAGAGGGGGAGCTCGGGG  
 TGGGTGATGCACGAGTACTCCGTGACGGCGCCGGCTGACCTCGCCTCGTCGCCGCTCCGG  
 CTCTACCGCATCCGATTACAGCGGCTACGGCAAGAAGCGGAAGAGAGAGCCGGAAGACGAC  
 GGTGAGCACATGGCGCGCCCCGGCGGGCTGAGGCGGAGACTGCTCTGTTTCGATCTGGAG  
 GTCGGGGCCACCGCCACCGCCACTGCTCGTTCCTCCTCCCGCGGCGGCGGCGGCGGATCAT  
 GGCACCGATCAGAGCTCCTCCGGTGTGACCGACATGGTGTTCGTGATCTTCCCGACCTG  
 ATCGCTGATGCTGGAGCTGCTCTGCCCCGATCAGAACCAACAGGATTGGTCTGAAGTCGCC  
 GATCAGAGCTCCTTCTGTGTGATGGGCGATGACTCTTCTCTGCTGCTCCCTGATCTTCCT  
 GGGATGATTGATGACAATGAGCACCAGCAGTTTGTGCGGAGTGCGACATGCCACACCTG  
 TTCGTCCCGCAAGCAGAGGAAGCCATTGCTGGTGGTGGTGCAGCATCGGCGCCATCGGCG  
 GACAACCAGAACTGCGAGTTCAATGACGGCGAGGACATGGCATTGTCAGATTTTGAGTTT  
 CCGGAGAGTATTGATGAGGTGCTTAGCTACATCGACTTCAGCACGAGCGACACGAGCTGC  
 CGCGACTTCACCATGGACGAGCTGTTTCGATCTGCCGGTGGACTAG

## CDS

> **ONAC100**

ATGGCGGCGGCTGGCGCGGATGGGCTCCCTCCGGGGCTCAGATTGACCCCAGCGACGAC  
 GAGCTCGTCGGCCGGTACCTGCTCCGGCGCCTCCAGGGCCAGCCCCTCCCGCTCGACGGC  
 GTCGTCCTCGATGCCGATCCCCTGAGCGCGCAGCCATGGAGGCTTCTCGCGGATCACGGC  
 CGGGGCGGCGACGAAGCCTTCTTCCTCGCGGAGGCGCACGCCAAGAACGCCAAGGGCAAG  
 CGCCAGAAGCGCACCGTCGAGGGTGGAGGGTTCTGGCAGGGGCAGAGGATGTGCGTCGAC  
 GGCAAGAAGCTGCTCGTCCCCGGCGGCGACGACGGCGGCGGCGGCGGCGAAGTACTGGAG  
 ATCGCGTGGCGCAAGTATGTCTGAGCTTCTTTGCCGAGGGGGAGAGGGGGAGCTCGGGG  
 TGGGTGATGCACGAGTACTCCGTGACGGCGCCGGCTGACCTCGCCTCGTCGCCGCTCCGG  
 CTCTACCGCATCCGATTACAGCGGCTACGGCAAGAAGCGGAAGAGAGAGCCGGAAGACGAC  
 GGTGAGCACATGGCGCGCCCCGGCGGGCTGAGGCGGAGACTGCTCTGTTTCGATCTGGAG  
 GTCGGGGCCACCGCCACCGCCACTGCTCGTTCCTCCTCCCGCGGCGGCGGCGGCGGATCAT  
 GGCACCGATCAGAGCTCCTCCGGTGTGACCGACATGGTGTTCGTGATCTTCCCGACCTG  
 ATCGCTGATGCTGGAGCTGCTCTGCCCCGATCAGAACCAACAGGATTGGTCTGAAGTCGCC  
 GATCAGAGCTCCTTCTGTGTGATGGGCGATGACTCTTCTCTGCTGCTCCCTGATCTTCCT  
 GGGATGATTGATGACAATGAGCACCAGCAGTTTGTGCGGAGTGCGACATGCCACACCTG  
 TTCGTCCCGCAAGCAGAGGAAGCCATTGCTGGTGGTGGTGCAGCATCGGCGCCATCGGCG  
 GACAACCAGAACTGCGAGTTCAATGACGGCGAGGACATGGCATTGTCAGATTTTGAGTTT  
 CCGGAGAGTATTGATGAGGTGCTTAGCTACATCGACTTCAGCACGAGCGACACGAGCTGC  
 CGCGACTTCACCATGGACGAGCTGTTTCGATCTGCCGGTGGACTAG

Protein

> **ONAC100**

MAAAGADGLPPGLRFDPSSDELVGRYLLRRLQGQPLPLDGVVLDADPLSAQPWRLADHG  
 RGGDEAFFLAEEAHAKNAKGRQKRTVEGGGFVWQGRMCVDGKLLVPGDDGGGGGEVLE  
 IAWRKVLSFFAEGERGSSGWVMHEYSVTAPADLASSPLRLYRIRFSGYGKKRKREPEDD  
 GRAHGAPRRAEAETALFDLEVGPPLPVPPAAAAADHGTQSSSGVTDVFRDLPLD  
 IADAGAALPDQNNQDWSEVADQSSFCVMGDDSSLLLPDLPGMIDDNEHQFVRECDMPHL  
 FVPQAEEAIAGGAASAPSADNQNCFNDGEDMALSDFEFPESIDEVLSYIDFSTSDTSC  
 RDTMDELFDLPVD\*

Gene Structure

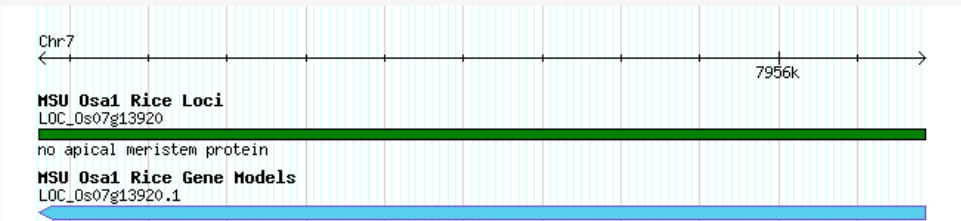

**LOC\_Os07g17180 (ONAC101) sequence information**

**Genomic sequence length:** 2141 nucleotides

**CDS length:** 1818 nucleotides

**Protein length:** 605 amino acids

Genomic Sequence

> **ONAC101**

ATGGCGGCGGGTGGTGGTGGCGCTGATGGGCTCCCTCCGGGCTCAGGTTGATCCGACC  
 GACGGCGAGCTCGTCTCCCGATTCTGCTCCGGCGCCTCCAGGGTAAGCCCCCTCCCGCTC  
 AATGGCGTCATCCTCGAGGCCGACCCCCCTCAGCGTGCCGCCATGGAAGCTGCTGGCGGAG  
 CACGGCCGGGGCGACGAGGGCTTCTTCTCGCCGAGGCTCGGGCCAAGAACGGCAAGGGG  
 AGCCGCCAGAAGCGCACCGTCGAGGGTAGTGGGCTCTGGCAGGGGCAAAGGGTCTGCGCC  
 GACGGCGAGAAGCTGCTCGTCCCCGATGGCGGCGGCGTGGAGGTGGAGATCGTGTGGCGC  
 AAGTACTTGCTGAGCTTCTTCGCCGAGGGCGAGAGGGGAGCTCCGGCTGGGTGATGCAT  
 GAGTACGCCGTCACGTCCCCCGCCGAGCTCGCCGCGTCGCCGATCCGGCTCTACCGCGTC  
 CGGTTACAGCGCCACGGCAAGAAGCGCAAGAGAGAGCCACAATCCGGCGAGGACGGTGTC  
 GGTTCGAGCACGCGCGGCCACAGAGCGCTGGAACAGAGACTGCTCTGCTCGAGGAGCGC  
 GTCATGCCGCCACAGCCGGCGCCCCAGAGCGTCGGAACAGAGGATGCCCTGGTCGAGGAG  
 CGCATCCCCGCCGCCACAGCCCGTTCCCATCCCTCCTATCGCCGGAACAGAGGATGCCCTG  
 GACGTCGGCACTGAGGACGTTTCGAGGACGAGCCGCGCCACAGAGCGCTGGAACAGAGTCT  
 GCTCTACTCGAGGAGTGCGTCTCGCCGCCACAGACCGCGCCCCAGATCACCGGAACAGGG  
 GTTGCTCTGCTCGACGAGGTGCTTCCACCGCCACAGACCGTGTGATTTCCCTCCCGCA  
 GCGCTGGTGGACGCTGTGATGATGTGACTGTGCCAATCAGGGATGCTCCGGCGTGATG  
 GACGATTCCACAATGGTGTTTCACTCATCTTCCGGACATGATCACCTGCCCCGAGAAGAA  
 GGTGATGCCGCCGGTGGTGCAGCGCTGGCGTCGATGGACTACTCCTGGGCTGATTTTGA

TTCCCAGAGATCAACATGGATGAGTTGCCTAACTGCATCGACTTCACCACAACTGACCCC  
 AGCTGCTTGACATTGAGCTCTCCATGGGCGACCTCCATGAGCCCCAGAGCACTGGAATA  
 GAGTCTGATCTGCTCGAGGAGTTCGTTCCGCAGCCACAGCCAGTGCTTGTTCCTCCTCTG  
 GCTGCTCTGGTTGAAGTTGCCGATAGCTCTGAAGGCCCTGATCAGGGATGCTCCGTTGTG  
 ATGCATGATTCTTCTGCGGTGTTTACTCATCTGTCAGACCCGATCGTCCTGCCAGAAGAA  
 GAAGAAGCTGATCGTCCTGATGCGCCGGCTGGGACTATGTCACTAGACTATCAGAACTAC  
 TCCTTGTCTGATTTTCGAGTTCCCAGAGTACCCTCTGCTCGATGTTGCCGGTGATGCTGAC  
 GGCGCAGATCAGTGCTCTTCCAACGTGATGGATGATTCTTCCATGGTGTTTAGTCACCTT  
 GAAGACCTGATTACCCCTACCAGCAGAGGAAGCAGAAGCCGATGCTTGTAGTGCAGCGCCT  
 GCGCCGTCGCTGGACAACCAAAAAATACTCCTCACAGGGCATCATCGACAGTGAGGCGCCG  
 GCATTGTCTGATTTTCGAGTTCCCAGAGACCATTGATGAGGTTCTAAACAGCATCAACTTC  
 ACAATGGCCGACCCGAGCTGCTTGGATATGGAGTTCTCCATGGACGACCTCTTAGACTTT  
 GATCCGCCGGCTGATTAGCCTCCTGAAGCAAGAGAGAGATTTGCTGATGTTATTATGTAG  
 AGAATTCAGTTTGATCTGTAGGCTGATTAGCTTAGTCCTTTGTAGGAAGAGATTTAGTTG  
 ATGATAATATCTGTAGATCAGAAGCGAGATGTGCTCTGATGCTTGTATTTATGGACAAAC  
 TGTATTATGAAAAGCTTTGTCCGCCCTGGTAGAAATAGATTTAATGATACTCGGTAGCTC  
 AGAATTGAGGTGTTTATGAGTTCTGTGCTCTGATGGGTTGTAATTATTGACAAAGTGAC  
 TTATCTTATTATGCAAATCTGAGATTATTCTTGATTGGTTC

CDS

> **ONAC101**

ATGGCGGCGGGTGGTGGTGGCGCTGATGGGCTCCCTCCGGGCCTCAGGTTGATCCGACC  
 GACGGCGAGCTCGTCTCCCGATTCTGTCCGGCGCCTCCAGGGTAAGCCCCCTCCCGCTC  
 AATGGCGTCATCCTCGAGGCCGACCCCCCTCAGCGTGCCGCCATGGAAGCTGCTGGCGGAG  
 CACGGCCGGGGCGACGAGGGCTTCTTCTTCGCCGAGGCTCGGGCCAAGAACGGCAAGGGG  
 AGCCGCCAGAAGCGCACCGTCGAGGGTAGTGGGCTCTGGCAGGGGCAAAGGGTCTGCGCC  
 GACGGCGAGAAGCTGCTCGTCCCCGATGGCGGCGGCGTGAGGTGGAGATCGTGTGGCGC  
 AAGTACTTGCTGAGCTTCTTCGCCGAGGGCGAGAGGGGAGCTCCGGCTGGGTGATGCAT  
 GAGTACGCCGTCACGTCCCCCGCCGAGCTCGCCGCGTCGCCGATCCGGCTCTACCGCGTC  
 CGGTTACAGCGGCCACGGCAAGAAGCGCAAGAGAGAGCCACAATCCGGCGAGGACGGTGTC  
 GGTGAGCACGCGCGGCCACAGAGCGCTGGAACAGAGACTGCTCTGCTCGAGGAGCGC  
 GTCATGCCGCCACAGCCGGCGCCCCAGAGCGTCGGAACAGAGGATGCCCTGGTCGAGGAG  
 CGCATCCCGCCGCCACAGCCGTTCCCATCCCTCCTATCGCCGGAACAGAGGATGCCCTG  
 GACGTCGGCACTGAGGACGTTTCGAGGACGAGCCGCGCCACAGAGCGCTGGAACAGAGTCT  
 GCTCTACTCGAGGAGTGCGTCTCGCCGCCACAGACCGCGCCCCAGATCACCGGAACAGGG  
 GTTGCTCTGCTCGACGAGGTGCTTCCACCGCCACAGACCGTGTCGATTTCCCCCTCCCGCA  
 GCGCTGGTGGACGCTGTCGATGATGCTGACTGTGCCAATCAGGGATGCTCCGGCGTGATG  
 GACGATTCCACAATGGTGTTCACTCATCTTCCGGACATGATCACCTGCCCCGAGAAGAA  
 GGTGATGCCGCCGGTGGTGCAGCGCTGGCGTCGATGGACTACTCCTGGGCTGATTTTGAG  
 TTCCCAGAGATCAACATGGATGAGTTGCCTAACTGCATCGACTTCACCACAACTGACCCC  
 AGCTGCTTGACATTGAGCTCTCCATGGGCGACCTCCATGAGCCCCAGAGCACTGGAATA  
 GAGTCTGATCTGCTCGAGGAGTTCGTTCCGCAGCCACAGCCAGTGCTTGTTCCTCCTCTG  
 GCTGCTCTGGTTGAAGTTGCCGATAGCTCTGAAGGCCCTGATCAGGGATGCTCCGTTGTG  
 ATGCATGATTCTTCTGCGGTGTTTACTCATCTGTCAGACCCGATCGTCCTGCCAGAAGAA  
 GAAGAAGCTGATCGTCCTGATGCGCCGGCTGGGACTATGTCACTAGACTATCAGAACTAC

TCCTTGTCTGATTTTCGAGTTCCCAGAGTACCCTCTGCTCGATGTTGCCGGTGATGCTGAC  
 GGCGCAGATCAGTGCTCTTCCAACGTGATGGATGATTCTTCCATGGTGTGTTAGTCACCTT  
 GAAGACCTGATTACCTACCAGCAGAGGAAGCAGAAGCCGATGCTTGTAGTGCAGCGCCT  
 GCGCCGTCGCTGGACAACCAAAAAATACTCCTCACAGGGCATCATCGACAGTGAGGCGCCG  
 GCATTGTCTGATTTTCGAGTTCCCAGAGACCATTGATGAGGTTCTAAACAGCATCAACTTC  
 ACAATGGCCGACCCGAGCTGCTTGGATATGGAGTTCTCCATGGACGACCTCTTAGACTTT  
 GATCCGCCGGCTGATTAG

#### Protein

##### > **ONAC101**

MAAGGGGADGLPPGLRFDPTDGELVSRFLLRRLQGKPLPLNGVILEADPLSVPPWKLLAE  
 HGRGDEGFFFAEARAKNGKGSRQKRTVEGSLWQGGQRCADGEKLLVPDGGGVEVEIVWR  
 KYLLSFFAEGERGSSGWMHEYAVTSPAELAASPIRLYRVRFSGHGKKRKREPQSGEDGV  
 GRARAAPQSAGTETALLEERMPPQPAPQSVGTEDALVEERIPPPQPVPPIPIAGTEDAL  
 DVGTEDEVGRAPQSAETESALLEECVLPQTAPQITGTGVALLEVVPPPQTVSISPPA  
 ALVDAVDDADCANQGC SGVMDSTMVFSHLPDMITLPAEEGDAAGGAALASMDYSWADFE  
 FPEINMDELPNCIDFTTTDPSCLDIELSMGDLHEPQSTGIESDLLEEFVPPQPVLPPL  
 AALVEVADSSEGPDQGC SVVMHDSSAVFTHLSDPIVLPEEEEEADRPDAPAGTMSLDYQNY  
 SLSDFEFPEYPLLDVAGDADGADQCSSNMDDSSMVFSHLEDLITLPAEEAEADACSAAP  
 APSLDNQKYSSQGIIDSEAPALSDFEFPETIDEVLNSINFTMADPSCLDMEFSMDDLDF  
 DPPAD\*

#### Gene Structure

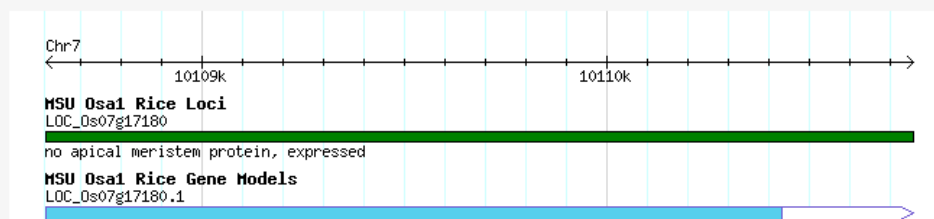

#### LOC\_Os07g27340 (ONAC102) sequence information

**Genomic sequence length:** 1914 nucleotides

**CDS length:** 1914 nucleotides

**Protein length:** 637 amino acids

Genomic Sequence

##### > **ONAC102**

ATGGCGGCGGCGGCGGATGGGCTCCGCGGGCGTCAGGTTCGACCCCGCCGACGACGAG  
 CTCGTCTCCCGCTACCTGCTCCGGCGCCTCCGGAAGCAGCCCATCCCGCTCCACGGCGTC  
 ATCCACGAGGCGGATCCCCTCGGCGCGCCGCCATGGATGCTCCTCGCCGATCACGGCCGG  
 GGCGGCGACGAGGCCTTCTTCTCGCCGAGGCGCGGCCAAGAACGTCAAGGGGAAGCGG  
 CAGAAGCGTACCGTCGAGGGTGGGGGGTTCTGGCAGGGGCAGCGGGTTTGCGTCGACGGT  
 GAGAGGCTGAGCGTCCAGGCGGCGACGGCGGCGGCGAAGTCGGCGGCGGGTTGGAGATC  
 GAGTGGCGGAAGTACATGCTGAGCTTCTTCGCCGAGGGGGAGAGGGGCAGCTCGGGGTGG



GTGATGCACGAGTACGCCATCACGGCGCCCGATGATCTCGCCTCGTGGCCGATCCGGCTT  
TACCGCGTCCGTTTCAGCGGCCACGGCAAGAAGCGCAAGCGGGAGCCGGAACGCCTGGGC  
GCCCCGCTCCATGACGACGACGTCGACGGTGGACAACGCGCCGCGCCCCGGCGCGCCGTG  
ACAGAGACCGCCCTGTTTCGTGCAGCCGAGCGCCGTGGATTGCGCCGAATCCGCTGGTCAG  
AGCTTCTCCGGCGCGATCGAGCCTGTGTTCCACGATCTCCCCGACATGATGCCGGAGCAA  
GCTGATGCCGGAGACACTACAGAGACTACCGCAGCGGTGGTGAACCTCACGGACGCCATG  
TCCGAGCAGCCCGTTCTTCCGCTAGCAGCAGATGGCGACGATCAGAGCTCCTACGGTGTC  
ATCGATCCGGCGTTCGCGATCTTGCTGACCTGATCGTCTTGCCACCTGAGCCAGATGAC  
GGTGGCATGGAACGCGCCACGCCCTGCACTCCCATGTCAGAGACCGCCCTGTTTCGAGCAG  
CAAGGGCTCCTGGCAATGCTGATTGCGCCGATCATCAGAGCTCCTACGGTGTCATCGAT  
CCGGCGTTCGTGAGCAAGCCGACGCCGGAGAGGCAGAGACCACCGTATCCGCAGCAGTG  
GTGAACCAGAACTACTCCATGGCGTTGTGTGATTTCATTTTCCGGAGGTACTCAGCTAC  
GTCGACTTCACCGCCGGCATGGAGCCCTCCTGGCAACAGCGCTGGCCTCCCATGTCAGAG  
AGCGCCCCGTTCGAGCAGCAGGAGCCTCCGCTCGCGCCCGTGGCAATGGTGGATCTCCCT  
CCTGGCAATGCCGATTGCGCCGATCATCAGAGCTGCTCTGGCGTGATCGACCCGGCGTTC  
CGTGATCTCCCCGACATGACCGTCTGCCACCAGAGCAAGCTGACACCGGAGGCGGAGCA  
GAGACTACCACAGCAATGGTGAGCCTCACGGACAAGCTGAAATACTCCTCCTCCATGGAC  
GGCGAGGCAGCGCAGGCGTGGTGTGATTTCGATTTTCCAGAGAGCACTGATGAGGCGCTC  
AGCTACATCGACTTCACTGCCGGCGCCACACTGACAACGACGGTGGCGTGTCAGAGACC  
GCCATGTTTCGAGCAGCTGGGGTCTCCGCCACAGCACGATCCTCTGCCGATGGATGCTGAT  
GGCGCCGATCAGAGCTCCTCCGGCCCCGTTGATCGACACGGTGTTCGTGATCACGCCGAA  
CCGATCGTCTGCCACTAGAGCAAGCTGACACCGGAGGTGGTGCAGCAGCGGCGGTGAAC  
CTCATGGACAAGCAGAAATTCCTCCTCCATGGACGGCGAGGCGGTGCCGGCGTGGTGT  
GATTCGGATTTCCCGGAGAGCATTGACGAGGTGCTCAGCTACATCGACGTCAGCACCGAT  
GACACGAGCTGCATCGACTTCTCCATGGACGACCTCTTCGATCTTGACAGACTAG

CDS

> **ONAC102**

ATGGCGGCGGCGGCGGATGGGCTTCCGCCGGGCGTCAGGTTTCGACCCCGCCGACGACGAG  
CTCGTCTCCCGCTACCTGCTCCGGCGCCTCCGGAAGCAGCCCATCCCGCTCCACGGCGTC  
ATCCACGAGGCGGATCCCCTCGGCGCGCCGCCATGGATGCTCCTCGCCGATCACGGCCGG  
GGCGGCGACGAGGCCTTCTTCTTCGCCGAGGCGCGCGCAAGAACGTCAAGGGGAAGCGG  
CAGAAGCGTACCGTCGAGGGTGGGGGTTCTGGCAGGGGAGCGGGTTTGCGTCGACGGT  
GAGAGGCTGAGCGTCCCAGGCGGCGACGGCGGCGGCGAAGTCGGCGGCGGGTTGGAGATC  
GAGTGGCGGAAGTACATGCTGAGCTTCTTCGCCGAGGGGGAGAGGGGAGCTCGGGGTGG  
GTGATGCACGAGTACGCCATCACGGCGCCCGATGATCTCGCCTCGTGGCCGATCCGGCTT  
TACCGCGTCCGTTTCAGCGGCCACGGCAAGAAGCGCAAGCGGGAGCCGGAACGCCTGGGC  
GCCCCGCTCCATGACGACGACGTCGACGGTGGACAACGCGCCGCGCCCCGGCGCGCCGTG  
ACAGAGACCGCCCTGTTTCGTGCAGCCGAGCGCCGTGGATTGCGCCGAATCCGCTGGTCAG  
AGCTTCTCCGGCGCGATCGAGCCTGTGTTCCACGATCTCCCCGACATGATGCCGGAGCAA  
GCTGATGCCGGAGACACTACAGAGACTACCGCAGCGGTGGTGAACCTCACGGACGCCATG  
TCCGAGCAGCCCGTTCTTCCGCTAGCAGCAGATGGCGACGATCAGAGCTCCTACGGTGTC  
ATCGATCCGGCGTTCGCGATCTTGCTGACCTGATCGTCTTGCCACCTGAGCCAGATGAC  
GGTGGCATGGAACGCGCCACGCCCTGCACTCCCATGTCAGAGACCGCCCTGTTTCGAGCAG  
CAAGGGCTCCTGGCAATGCTGATTGCGCCGATCATCAGAGCTCCTACGGTGTCATCGAT

CCGGCGTTCTGTGAGCAAGCCGACGCCGGAGAGGCAGAGACCACCGTATCCGCAGCAGTG  
GTGAACCAGAACTACTCCATGGCGTTGTGTGATTTCATTTTCCGGAGGTACTCAGCTAC  
GTCGACTTCACCGCCGGCATGGAGCCCTCCTGGCAACAGCGCTGGCCTCCCATGTCAGAG  
AGCGCCCCGTTTCGAGCAGCAGGAGCCTCCGCTCGCGCCCGTGGCAATGGTGGATCTCCCT  
CCTGGCAATGCCGATTGCGCCGATCATCAGAGCTGCTCTGGCGTGATCGACCCGGCGTTC  
CGTGATCTCCCCGACATGACCGTCCTGCCACCAGAGCAAGCTGACACCGGAGGCGGAGCA  
GAGACTACCACAGCAATGGTGAGCCTCACGGACAAGCTGAAATACTCCTCCTCCATGGAC  
GGCGAGGCAGCGCAGGCGTGGTGTGATTTCGATTTTCCAGAGAGCACTGATGAGGCGCTC  
AGCTACATCGACTTCACTGCCGGCGCCACACTGACAACGACGGTGGCGTGTCAGAGACC  
GCCATGTTTCGAGCAGCTGGGGTCTCCGCCACAGCACGATCCTCTGCCGATGGATGCTGAT  
GGCGCCGATCAGAGCTCCTCCGGCCCGTTGATCGACACGGTGTTCGTGATCACGCCGAA  
CCGATCGTCTGCCACTAGAGCAAGCTGACACCGGAGGTGGTGCAGCAGCGGCGGTGAAC  
CTCATGGACAAGCAGAAGTATTCCTCCTCCATGGACGGCGAGGCGGTGCCGGCGTGGTGT  
GATTCGGATTTCCCGGAGAGCATTGACGAGGTGCTCAGCTACATCGACGTCAGCACCGAT  
GACACGAGCTGCATCGACTTCTCCATGGACGACCTCTTCGATCTTGACAGACTAG

Protein

> **ONAC102**

MAAADGLPPGVRFPADDELVSRYLLRRLRKQPIPLHGVIEADPLGAPPWMLLADHGR  
GGDEAFFFAEARAKNVKGRQKRTVEGGGFQQQRVCVDGERLSVPGDGGGEVGGGLEI  
EWRKYMLSFFAEGERGSSGWMHEYAITAPDDLASWPIRLYRVRFSGHGKKRKREPERLG  
ARVHDDVDVGGQRAAPRRAVTETALFVQPSAVDCAESAGQSFSGAIEPVFHDLPDMMPEQ  
ADAGDTTETTAAVVNLTDAMSEQPVLPPLAADGDDQSSYGVIDPAFRDLADLIVLPPEPDD  
GGMERATPCTPMSETALFEQQGPPGNADCADHQSSYGVIDPAFCEQADAGEAETTVSAAV  
VNQNYSMALCDFNFPEVLSYVDFTAGMEPSWQQRWPPMSESAPFEQQEPPLAPVAMVDLP  
PGNADCADHQSCSGVIDPAFRDLPDMTVLPPEQADTGGGAETTTAMVSLTDKLYSSSMD  
GEAAQAWCDFDFPESTDEALSYIDFTAGAHTDNDGGVSETAMFEQLGSPPQHDPLPMDAD  
GADQSSSGPLIDTVFRDHAEPVLPLEQADTGGGAAAANLMDKQKYSSSMDGEAVPAWC  
DSDFPESIDEVLSYIDVSTDDTSCIDFSMDLFDLAD\*

Gene Structure

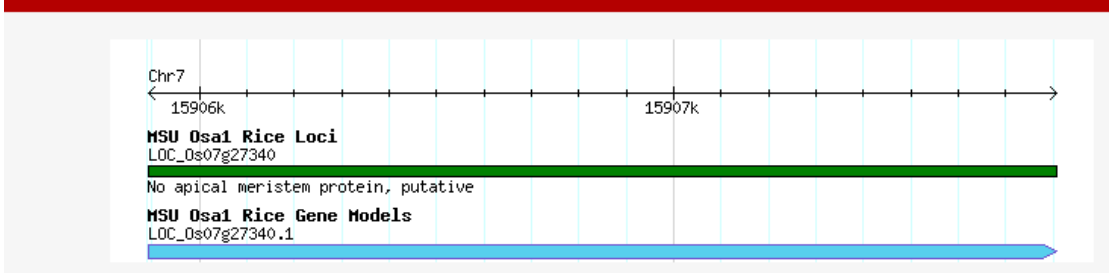

**LOC\_Os07g48450 (ONAC103) sequence information**

**Genomic sequence length:** 2236 nucleotides

**CDS length:** 1041 nucleotides

**Protein length:** 346 amino acids

Genomic Sequence

> **ONAC103**

GGAGGATCGATCGATCGATGAGCACTCGCTTTGATTGATCAATCGATTGATCGAGCTAT  
 AGGTAGCCAATTACAAGCTAATTAAGCAGTAACCGTATTAGATCGTCGATGGAGATGAC  
 GATGTCGTCGGCGGCGACGTCGCTGCCGCCGGGGTTCCGGTTCCACCCGACGGACGAGGA  
 GCTGATCCTGCACTACCTCCGCAGCCGCGCCACCGCCGGGCAGTGCCCGTCCCCATCAT  
 CGCCGACGTCGACATCTACAAGTTCGATCCATGGGACCTGCCATGTAAGCCTTCTTCCTC  
 GATCATATCGATGGATCGATTGAGTTGGTCGTTCCGGTCAATTGCTACTGGTTAATTAATT  
 GCAGCGAAGGCGGTGTACGGGGAGAGTGAGTGGTATTTCTTCAGCCCGCGAGACCGCAAG  
 TACCCCAACGGAATCCGGCCGAACCGCGCCCGGGTCCGGGTACTGGAAGGCGACGGGA  
 ACCGACAAGCCCATCCACGACAGCGCCACCGCGGAGAGCGTCGGCGTCAAGAAGGCCCTC  
 GTCTTCTACCGCGGCCGCCCTCCCAAGGGCACCAGACCGAGCTGGATCATGCACGAGTAC  
 CGCCTCGCCGCCGACCCCTCTCGCCGCCGCCGCAAACACCTACAAGCCCTCCTCCTCCTCC  
 CGATTCCGCAACGTCTCCATGAGGGTATGTACCTACTCATACGCCATCGCCAATTCGCCA  
 TGACCACCATCTCTGAGCTTAACTACTAACTGCATATCCATCCATCTCCTCATGCCACTT  
 GCGTGCTCTCATCTGTGTCACCACTACTAATTGAACTACTGTACTCTTCTTCTAGGATA  
 TTGTAATTTAATCAGATGATTGGACTGACGTACGCTTATTAACCTTTTTTTTAAATGAATA  
 CTAGCATCACTCAATCATTAAATCACTCGCTACTGTTAGTACCACATCATGAAACCGTGG  
 ATGGTACGTAACAAGAGAGATACTCCTTTCTCTTTTCACTTGCTGTAAATTTAATTTAAT  
 TTCAGAGTATAATAATTATACCGAGAGAAGAATAGAGATATCCATTAGCCTTGTCTTGGC  
 GCCATGCATGCATGTGTGGTTATTATCGATTTAAAGTATGTAGCTTTTGACAATGATAGG  
 CATGACATTTTTGTGCTCATCGATCCATCTGCTTAATTACGTGCAGCTGGACGACTGGGT  
 GCTCTGCCGATCTACAAGAAGTCCGGCCAGGCGTCGCCGATGATGCCGCCGCTCGCCGC  
 CGACTACGACCACGACGAGCCGTCCGGAGTCCCTGACGACGCCTACAGCTTCTACGCGCC  
 GCCGATGATCAGCACCACGCTCATCCCCAAGCTCCCCAAGATCCCCTCCATCTCCGAGCT  
 CTTGACGAGCACGCGCTCGCCAGATCTTCGACGCGCGCCGACCCGCCGGCCGACCA  
 CCATCAGCATGCCCTCGCCGTCCACCCCTCCCTGAACCAGCTCCTCGGCGTCGGCGACAA  
 CTTCTCTCGCGAGTGCTACCCGTGACGGCGTCCACGGCCACCGTTGCCGGCGGCAAGCG  
 CAAGGCGAGCCCGGCCGAGACTACGCCGGCGGCGGCCACACGCCGGCGAAGAGGCTCAA  
 CGGCTCATGCTTCGACGTGGCGCCGAGTCCGTGGTGGGCGGCTTGCAAGCGACGCCGTC  
 GTCAGTCTCGCCGACTCAACCACCAGATGCTTCCTCCTCAGCTATTCTGAATATATTC  
 TTAAGTACTTAATTAATGGCCATGGAAATCGATCAAACGCAGTCGATCGAATTTACGGA  
 TGCTACGTACTGGCATGAACAATCTTGCCGACGATATTAAGATCGGATGGAAGCATGGAC  
 GACGATGATGATTGGGGTACGGTATAGAATTATTGTAGTATTGAACAATTAGGCATTTGT  
 ATGCGATTTTTTCTCCTACGTATTCATTTCAAGGCACAGTGCAAAAGCAAGCTGGAGCCTT  
 GATAGTACTTTACACCGTAGAGAGGGAATGTTGTACAATTAAGATTACTAGATATACAG  
 AACATAATACTTTACTGTAGCCAATTGATATACTACTAGTATACAGGATTGTAGAAGAT  
 ATCAAAATGCAATAGATTCTGGCTCTGATCTGGGAAATGGAAATTGCATGGATGTGTTACT  
 TCTTGGCTGAAGTAGGTGTAATATCAATGGAGCATGCATGCAGTCTAACGGCAAACCTTC  
 ATCTTCTGTTCTTAAA

CDS

> **ONAC103**

ATGGAGATGACGATGTCGTCGGCGGCGACGTCGCTGCCGCCGGGGTTCCGGTTCCACCCG  
 ACGGACGAGGAGCTGATCCTGCACTACCTCCGCAGCCGCGCCACCGCCGGGCAGTGCCCC  
 GTCCCCATCATCGCCGACGTCGACATCTACAAGTTCGATCCATGGGACCTGCCATCGAAG

CGGGTGTACGGGGAGAGTGAAGTGGTATTTCTTCAGCCCCGCGAGACCGCAAGTACCCCAAC  
GGAATCCGGCCGAACCGCGCCGCCGGGTCTGGGGTACTGGAAGGCGACGGGAACCGACAAG  
CCCATCCACGACAGCGCCACCGGCGAGAGCGTCTGGCGTCAAGAAGGCCCTCGTCTTCTAC  
CGCGGCCCGCCCTCCCAAGGGCACCAAGACCAGCTGGATCATGCACGAGTACCGCCTCGCC  
GCCGACCCTCTCGCCGCCGCCGCAAACACCTACAAGCCCTCCTCCTCCTCCCGATTCCGC  
AACGTCTCCATGAGGCTGGACGACTGGGTGCTCTGCCGGATCTACAAGAAGTCCGGCCAG  
GCGTCGCCGATGATGCCGCCGCTCGCCGCCGACTACGACCACGACGAGCCGTCCGGAGTC  
CTTGACGACGCCTACAGCTTCTACGCGCCGCCGATGATCAGCACCACGCTCATCCCCAAG  
CTCCCCAAGATCCCCTCCATCTCCGAGCTCTTCGACGAGCACGCGCTCGCCCAGATCTTC  
GACGCCGCCGCCGACCCGCCGGCCGACCACCATCAGCATGCCCTCGCCGTCCACCCCTCC  
CTGAACCAGCTCCTCGGCGTCTGGCGACAACCTCCTCGCGGAGTGCTACCCGTGACGGCG  
TCCACGGCCACCGTTGCCGGCGGCAAGCGCAAGGCGAGCCCGGCCGGAGACTACGCCGGC  
GGCGGCCACACGCCGGCGAAGAGGCTCAACGGCTCATGCTTCGACGTGGCGCCCGAGTCC  
GTGGTGGGCGGCTTGCAAGCGACGCCGTCTGTCAGTCTCCTCGCCGACTCAACCACCAGATG  
CTTCCTCCTCAGCTATTCTGA

## Protein

## > ONAC103

MEMTMSSAATSLPPGFRFHPTDEELILHYLSRATAGQCPVPIIADVDIYKFDPWDLPSK  
AVYGESEWYFFSPDRDKYPNGIRPNRAAGSGYWKATGTDKPIHDSATGESVGVKKALVFY  
RGRPPKGTKTSMIH EYRLAADPLAAAANTYKPSSSRFRNVSMRLDDWVLCRIYKKSQ  
ASPMMPPLAADYDHDEPSGVLDDAYSFYAPPMISTTLIPKLPKIPSISELFDEHALAQIF  
DAAADPPADHHQHALAVHPSLNQLLGVGDNFLAECYPSTASTATVAGGKRKASPAGDYAG  
G GHTPAKRLNGSCFDVAPQSVVGGLOATPSSVLAGLNHQMLPPQLF\*

## Gene Structure

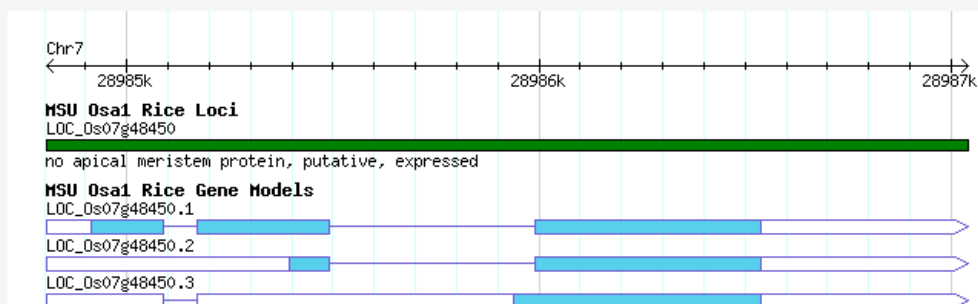

### LOC\_Os08g10080(ONAC104) sequence information

**Genomic sequence length:** 3785 nucleotides

**CDS length:** 882 nucleotides

**Protein length:** 293 amino acids

## Genomic Sequence

## > ONAC104

CCATTAGCTTGCTATTCTCTCTTCTTCTTCTTCTTCTTCTTCTTCTTCTTCTTCTTCTTC  
TTGGGTG TGATTGAGGTGGAGGAGGAGATGAGTTTCATAGGCATGGTGGAGGCCAGAATGC

CGCCGGGGTTCAGGTTCCACCCGAGGGACGACGAGCTGGTGCTGGACTACCTCCTGCACA  
AGCTCGCCGCCGGCGCCGGGGAGGAGGGGTGTACGGCGGCGGCGGCGGCGTCCGCGCATCG  
TCGACGTGACCTCAACAAGTGCAGCCATGGGACCTTCCAGGTTTGTATATGCTTATAT  
GCGTTTTGATCGATCGATTGATTATTGATTTTCTTGGAGAAAGAAAGAGGGGGGAAGGA  
ATATTTTCTTGTGTTGGGATGTTGTTGGTTGATTTCGTTTCGAGAAAGAAGATTTAAATTC  
CATTATTGGTATTGTTGATTGGTCCCTGTTCTTAGGTTTTTGGGGTAATTATTGGTGGT  
GTTTGTGTTGGTTCGTGTTGTTTATCTAGCTTCTTCTGGGAAATGGAATCTTTTCCTTCA  
CATGACATTTGTCATTTTGAAGAAAAAAGAGATGGACTCTTTCCGAAGAAAAAGATGG  
CAAAAAATTGTAAGATTTGGTTTTTTATCTTCAAAAGTTGGAATAAAGAAGAATTTCCA  
TCAAAGTGAAGCAGAGTGGCTTCTCACAGGTTTTTGAAGAAAATGATGAAAAAGGTAACAC  
AAAAGTGGCCTCTCACAGATTTTGATGAAAAAGATGATAAAATTGTAACAGAAAAGAAT  
TTCTCATGTATTTTAAATTGAAGAGAAGAGATAAAAAATTGAAAATGATGAATAAAATCA  
TATATTTTGAATTGAAGATACGAGATAAAAGAAAAATGAAATGATGAATAAAATCATATA  
TTTTGAATTGAAGAGAAGAGATAAAATAAAAATGAAAATGATGAATAAAACATAAACACA  
GATTCAGATTTTGATGAAAAAGATGGAACAAAACATAAGAAGAGATAAAATAAAAATGAA  
AATGATGAATAAAACATAAACACAGATTCAGATTTTGATGAAAAAGATGGAATAAAACAT  
AACACGAAGATTTATACTTCAATGAAACAAAAAATAAAAATGGCGTCGCCCCGACTCGAAC  
CGGAGACCTTCAGTGTGTTAGACTGACGTGATAACCAACTACACCACGACACCGAGCTGT  
TCAATCATCTCCTCTTCCCAATTCGATCTTCGTCTGATGAGTTCATGATCATCTTCTCTT  
GTCTTTTCCAATCGATCTTTCAATTCTCTGCCGCCATTGTTTGCAGACGCGGCGTGCGTG  
GGAGGCAAGGAGTGGTACTTCTTCAGCCTCCGCGACCGCAAGTACGCCACCGGCCACCGC  
ACCAACCGCGCCACCCGCTCCGGCTACTGGAAGGCCACCGGCAAGGACCGCTCCATCACC  
CGCCGCTCCTCCATCTCCTCCGGCGAGCCCTCCTCCTCCGCCGCCGCCGCCGCTCGGC  
ATGCGCAAGACGCTCGTCTTCTACCGCGGCCGCGCCCCAAGGGCCGCAAGACCGAGTGG  
GTCATGCACGAGTTCGGCTCGAACCGCAGCCTCTCCACCTCAAGGTGAAGACAGATTCT  
GAATTTCTTCTTCTCTTCTTCTGTTTTTCTTTTTTTTTTGTGTTGTTCTTCGTTCCG  
ATTGCGTGGATCCGACAAGATCAGAGCACGCCGTTTTTCGTGTTTCATGTTTCGAGGAAGAA  
GATTGATGCTGAGTTTTCTTTTTTTTTTCTGAAGAAAAAAGATGATGCTGAGTTTTATT  
AAAAATGATAGGGGCGAAATGAAAAGATTGGTTGCTGTTTGCTACAGTTAGAATACCTGTC  
AAAGAACTCACTGTCAGATTATACATGTTTCAGAAAGCTCTGTTACAAATAGGGGGGAAAA  
ATCAGCTTTTAGGGAAAAAAAATGATGCTGAGTTTCTTTTCTTTTCTGTTTTGTTTTCA  
CACACTATCATGAATTTTATTTAAAGATAGGGGGAAATGAAAAGATTGATTGGTTGCTGT  
AGATGTTTCTGTTTGCTACAGTGAGAATGCCTGTCAAAGAATTCAGTGCAGATTATACA  
TGTTTCAGAAAGCTCTGTTACAAATAGAAAAAAAACAGCTTTTAGGGGAAAAAAGATGAT  
GCTGAGTTTCTTTTCTTTTTTCTGTTTTGTTTTCACAACTGTCATGAACTTTATTA  
GATAGGGGGAAATGAAAAGATTGATTGGTTGCTGTAGATGTTTCTGTTTGCTACAGTGAG  
AATACCTGTCTCACTGTCAGATTATACATGTTTAGAAAGCTCTGTTACAAATAGAAAAA  
AAATCAGCTTTTAGGGGAAAAAATTAGACTTTTTTTATTGTCATGTTGCTACCTCCAGTG  
AGCTCATCATCATCTGTTGTGTCATCATATGCGTGTGCGGTCACCTACCATGGCAATTG  
GCAAAGCCTGAATTTTGTAAACAATATGGTCTCTAACTGTTTCGTTTTTCAGGCTAACTCGAT  
GCTTCTCTCAACATTCTTTCCTGATAAACTAGCTGCAAGTTGCCAGGGCTCTAGTTTTAG  
TTGGATGACCCTACAAAAAGTTTAGTCTTCTTTTGATCCAGTCCATAGTTGTTTCAGCTGG  
CTCCATCAGATTACTGAGCTAGATTAATGTCATAAACATTCCCTCCAAAAGATTTGACT  
GTCTTATCGTGGTTGTTTACTCCAAGTTGACACTTAAACATTTCAGGCTTCATGATTGC  
TAACTCATCAAGCAACTATATAACTTGCCAACAATGATTTCTCATGCAACTTGCTGCAG

AGTCTGTTATGTTGGTTGCATCAGCATTATCCATCGTGCTAATAAGTTAATGAAATTTGA  
 AGTCTTCTTGTCCCTTAACCACTACATATGACCTGAAAATGATTTGATTCTCTACAGAATA  
 ATGTTACAGTTACAGTTATTACTTATTACAATTTTAACCTTTTCATAGATCATTTCGACTTA  
 ATACCATGTTAAACATGAACATCACCTAATTACACGAAAACAAAATACAGGAGGACTGGG  
 TGCTATGCAGGGTGTCTACAAGACCAGACAAACAATTCCAAGCCCATCATCTGAAGAGG  
 CCGTCACACTGCCCAATGAGCTAGACCTGCCTGCCACGCCTTCGCTCCCGCCCCCTCATCG  
 ATGCCTACATCGCCTTCGATAGCGCACCCGACGACGACGCCATCGATGGTCGGGAGCTACG  
 AGCAAGTGTCTGCTTCTCCGGCCTGCCGGCATTGCCAATGAAGGGCTCCATCAGCTTTG  
 GGGACCTGCTGGCCATGGACACCTCTGCAGAGAAGAAGGCCATCAGGGTACTGCACAACA  
 GCAACACTGCAAAGCTGGAGCTCTCCCCAGATTGGGGACAGGAGAGTGGCCTGTCACAGA  
 TGTGGAACCCCCAATAATGATCTTGATCTTGATATTGATATTGATATTGATATTGATATT  
 GATATTGATGATGTTTGTGTTGCTACTTGCTAGATAGCGATTACTACTGAATGCAGTGTG  
 GCAAATAACTTGTAAGAGGTGACATATTCTTTCCCTCTGCTGGAGTAGTAGCTGTGCATA  
 CATTTTGTATTTGATTGGAAAATTTGATTAGGGGTGTGACATACACAGTAGAGTAGTGAA  
 AATGGCTTGGTGTAGAATCTGTACATAGGATTGCAGAAAAGGGTTATCCCTTTCTCTTTA  
 CTCTCTAGATGATTTGTCATTGCAGATGAATAAAGATTTTCAGAGACAGGCATTGTGTGG  
 ATAAA

CDS

> **ONAC104**

ATGAGTTTCATAGGCATGGTGGAGGCGAGAATGCCGCCGGGGTTCAGGTTCCACCCGAGG  
 GACGACGAGCTGGTGTGCTGGACTACCTCCTGCACAAGCTCGCCGCCGGCGGCCGGGAGGA  
 GGGGTGTACGGCGGGCGGGCGGGCGTCCGATCGTCGACGTCGACCTCAACAAGTGCAG  
 CCATGGGACCTTCCAGACGCGGCGTGGTGGGAGGCAAGGAGTGGTACTTCTTCAGCCTC  
 CGCGACCGCAAGTACGCCACCGGCCACCGCACCAACCGCGCCACCCGCTCCGGCTACTGG  
 AAGGCCACCGCAAGGACCGCTCCATCACCCGCCGCTCCTCCATCTCCTCCGGCGAGCCC  
 TCCTCCTCCGCCGCCGCCGCCGCCGTCGGCATGCGCAAGACGCTCGTCTTCTACCGCGGC  
 CGCGCCCCAAGGGCCGCAAGACCGAGTGGGTTCATGCACGAGTTCCGGCTCGAACCGCAG  
 CCTCTCCACCTCAAGGAGGACTGGGTGCTATGCAGGGTGTCTACAAGACCAGACAAACA  
 ATTCCAAGCCCATCATCTGAAGAGGCCGTCACACTGCCCAATGAGCTAGACCTGCCTGCC  
 ACGCCTTCGCTCCCGCCCCCTCATCGATGCCTACATCGCCTTCGATAGCGCACCGACGACG  
 ACGCCATCGATGGTCGGGAGCTACGAGCAAGTGTCTGCTTCTCCGGCCTGCCGGCATTG  
 CCAATGAAGGGCTCCATCAGCTTTGGGGACCTGCTGGCCATGGACACCTCTGCAGAGAAG  
 AAGGCCATCAGGGTACTGCACAACAGCAACACTGCAAAGCTGGAGCTCTCCCCAGATTGG  
 GGACAGGAGAGTGGCCTGTCACAGATGTGGAACCCCCAATAA

Protein

> **ONAC104**

MSFIGMVEARMPPGFRFHPRDELVL DYLLHKL AAGGRGGGVYGGGGVAIVDVLNKCE  
 PWDLPDAACVGGKEWYFFSLRDRKYATGHR TNRATRS GYWKATGKDRSITRRSSI SGEP  
 SSSAAAAAVGMRKTLVFYRGRAPKGRKTEWVMHEFRLEPQPLHLKEDWVLCRVFYKTRQT  
 IPSPSSEEAVTLPNELDLPATPSLPLIDAYIAFDSAPTTTPSMVGSYEQVSCFSGLPAL  
 PMKGSISFGDLLAMDTSAEKKAIRVLHNSNTAKLELSPDWGQESGLSQMWN PQ\*

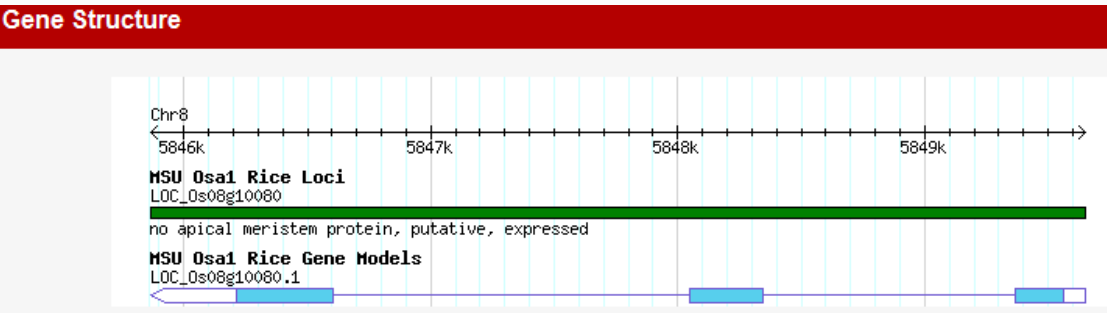

**LOC\_Os08g23880 (ONAC105)sequence information**

**Genomic sequence length:** 1344 nucleotides

**CDS length:** 1344 nucleotides

**Protein length:** 447 amino acids

**Genomic Sequence**

**> ONAC105**

ATGGCGGCGGCGAAGATGGCGGGGCTGACGCCGGGGTTCAAGTTCGAGCCGAGCGACGAG  
CAGCTCGTGCAGTTCTTCCTCCTGCCCTACCTGCGCGAGCTGCCGGTGCCCCCTGGGCGGC  
CTCGTCATCCGGGACGACCCGAGGAGCGTGCCGCCATGGAAGCTCTTCGCGCGCAACGGC  
CGGGGCGACGAGGAGGACGCCTACTTCCTCGCGCCAGCCGACGGCGAGGGCCGGCAGGCG  
CGCACCTGCGACGGCGGCCGCGCAGGTGGATCACCCAGCGGCTGGAGCGCACGGGCAAC  
CTGCGGCTCGCCGGCGGCGGCGGCGAGCGGCGAGGCCGTGCGTGTTCGAGAAGCACAGGCTC  
AACTACCACGCCGGCGAGGGGCGGTGCGGCAGCACGGGGTGGGTGATGCACGAGTACGCC  
GTCGTCAAGCCCGCGGCGCTCGGCGCCCGCCACAGGGCGTGCCACATCGCCTTCACCGGC  
CACGGCCAGAAGCGGAAGCGCGTGCCCGACGGCTACGTCGACGTCGAGGACGACGGCAGC  
AAGGCCAGCACCAACGCGGCCGCCCGCTCCCTCCTTCCTCGACGGCGGCGATGTCGGCG  
TGCCCATCGAATGTCACCTATAACCAAGGGTGCCATATCTCGCCGAGCAGAGCATCGAA  
CAGCACTTCCCCGCGGAGCATAATAATATCCAAATCCAACAGCAAGCTTACTACCAATCA  
CAAGACCACGAGCAGTGCCAGTACAGCGACGAAGAAAAATACCTGTTGCAGCAGATCAAG  
CAAGAACAATACTACTACAACCAGCAAACTGCTTCTTGCCAGGCCAAGGCAACCAAGAA  
CTGTACTACAACGACGAGCAGCAGCAAAATATTCTCGTTGCCGGAGCATCAGTGCAGCCAA  
GAACAGTACTGCCATCACGACGACCAGCAAGACTGCGTCTTGCCGGAGCAACACAGCCAA  
GAACTACACGGGTACAACAACGAAGAACAAGGATACCTCTTGCCGCCGGAGCCGATCGAC  
CAGGAGGAACAAGCCCTCTTCGTGCGGCGGCGAGCCGAGCATGAACAACAACCCTTGACG  
TCAACCCCGCGGCAGGCTCTTCTTGATTATGATGATGGGAAGCTCCTGCCGCCGGTTCGGC  
GTCAACGGCGCCATCGCGATCCCGCCGAGGACGCCGCCGTGGCGTCCAACGACGACGAC  
GGTGGGCAGGCTACGGAAGCGCCGGCTGCGAAGATGACGGCGGAGGAGAAGAAGTGGTTC  
ATGGAAGAGTTATTGACCGAGGGCTGTTGGTCTGGACCTCTTCTTCGACCAACCGTAC  
TACGGTAGTGCGCTGAAGAATTGA

**CDS**

**> ONAC105**

ATGGCGGCGGCGAAGATGGCGGGGCTGACGCCGGGGTTCAAGTTCGAGCCGAGCGACGAG

CAGCTCGTGCAGTTCTTCCTCCTGCCCTACCTGCGCGAGCTGCCGGTGCCCCCTGGGCGGC  
 CTCGTATCCGGGACGACCCGAGGAGCGTGCCGCCATGGAAGCTCTTCGCGCGCAACGGC  
 CGGGGCGACGAGGAGGACGCCTACTTCCTCGCGCCAGCCGACGGCGAGGGCCGGCAGGCG  
 CGCACCTGCGACGGCGGCCGCGGCAGGTGGATCAGCCAGCGGCTGGAGCGCACGGGCAAC  
 CTGCGGCTCGCCGGCGGCGGCGGAGCGGCGAGGCCGTCTGTTCGAGAAGCACAGGCTC  
 AACTACCACGCCGCGAGGGGCGGTGCGGCAGCACGGGGTGGGTGATGCACGAGTACGCC  
 GTCGTCAAGCCCGCGGCGCTCGGCGCCCCGCCACAGGGCGTGCCACATCGCCTTCACCGGC  
 CACGGCCAGAAGCGGAAGCGGTGCCCCGACGGCTACGTCGACGTCGAGGACGACGGCAGC  
 AAGGCCAGCACCAACGCGGCCGCCGCCGTCCTCCTTCCTCGACGGCGGCGATGTCGGCG  
 TGCCCATCGAATGTCACCTATAACCAAGGGTGCCATATCTCGCCGAGCAGAGCATCGAA  
 CAGCACTTCCCCGCGGAGCATAATAATATCCAAATCCAACAGCAAGCTTACTACCAATCA  
 CAAGACCACGAGCAGTGCCAGTACAGCGACGAAGAAAAATACCTGTTGCAGCAGATCAAG  
 CAAGAACAATACTACTACAACCAGCAAACTGCTTCTTGCCAGGCCAAGGCAACCAAGAA  
 CTGTACTACAACGACGAGCAGCAGCAAATATTCTCGTTGCCGGAGCATCAGTGCAGCCAA  
 GAACAGTACTGCCATCACGACGACCAGCAAGACTGCGTCTTGCCGGAGCAACACAGCCAA  
 GAACTACACGGGTACAACAACGAAGAACAAGGATACCTCTTGCCGCCGGAGCCGATCGAC  
 CAGGAGGAACAAGCCCTCTTCGTGCGCGGCGAGCCGAGCATGAACAACAACCCTTGACG  
 TCAACCCCGCGGCAGGCTCTTCTTGATTATGATGATGGGAAGCTCCTGCCGCCGGTTCGGC  
 GTCAACGGCGCCATCGCGATCCCGCCGAGGACGCCCGCGTGGCGTCCAACGACGACGAC  
 GGTGGGCAGGCTACGGAAGCGCCGGTGCAGAGATGACGGCGGAGGAGAAGAAGTGGTTC  
 ATGGAAGAGTTATTGACCGAGGGCTGTTGGTCTGGACCTCTTCTCTTCGACCAACCGTAC  
 TACGGTAGTGCCTGAAGAATTGA

#### Protein

#### > ONAC105

MAAAKMAGLTPGFKFEPSDEQLVQFFLLPYLRELPVPLGGLVIRDDPRSVPPWKLFARNG  
 RGDEEDAYFLAPADGEGRQARTCDGGRGRWITQRLERTGNLRLAGGGGSGEAVVFEKHRL  
 NYHAGEGRCGSTGWVMHEYAVVKPAALGARHRACHIAFTGHGQKRKRVPDGYVDVEDDGS  
 KASTNAAAAPPSSTAAMSACPSNVTYNQGCHISPEQSIEQHFPAEHNNIQIQQQAYYQS  
 QDHEQCQYSDEEKYLLQKIQEQYYYNQNCFLPGQGNQELYYNDEQQQIFSLPEHQCSQ  
 EQYCHHDDQQDCVLPEQHSQELHGYNNEEQGYLLPPEPIDQEEQALFVGGEQHEQQPLT  
 STPRQALLDYDDGKLLPPVGVNGAIAIPPQDAAVASNDDGGQATEAPAAKMTAEKKWF  
 MEELLTEGCWSGPLLFDQPYYSALKN\*

#### Gene Structure

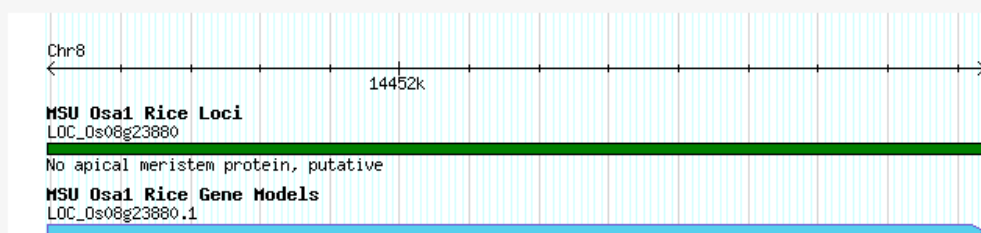

#### LOC\_Os08g33670 (ONAC106) sequence information



**Genomic sequence length:** 3416 nucleotides

**CDS length:** 1005 nucleotides

**Protein length:** 334 amino acids

**Putative Function:** no apical meristem protein, putative, expressed

#### Genomic Sequence

##### > ONAC106

```

ATTCTCGCCGCCACACAAGTTATTTTTGCCCCGCGATTCAATTCTCTGAATCAATCTCAGC
TACGGTAAGTCTTTTCATTTTCCCTGCCATGCTCATGAACACAAATTAAAGAATTAATTAAT
GTTTAACTAGATGGCCTTATTATCTCTACATCACACGTTATATCTATGATCTTGCAGTAT
ATCTACGCTAGCTTAGCTTTCATATTCGATCGTTTAATTAATTAGTAATTACACACTCGA
TCGTCCGATCATATGCATGAATGCTTGCATATTGTACTTTACTGTCACCTGGTATGTAAT
TCGCTCTGCTTTTTTCATGGTGTAGTGTTTACGTACACGTGTATATGTCATACTACCTCTA
TTTCAGAATAAAACAACCTTGTGATTATGTACATAGACATACTCTTATTCAAATACAGAGC
TAAAAATTTTATATTTTGAAACGGGGGTAGTAGTAGGGGAAATTGTTTTCATCCCTTAAG
ATATATCCCTTTGTTTTTTATACCACTTGAATAGCTACCAAAAGAATTGAAAAAAAAATA
GGCATGATAGATCCATAAGAAATATGCTATTCTACAAATATGCAAATTCAAATTCAATAT
ATAGAAATAAAAAACAAAAATAACATATTTATTGCAAATGGTGTGTACTATTCGCAGTGAA
ATTTGTTATTTTCGCTTCTACTTATATATGTTGAGTTTGAATTTGTATATTTATGAAATG
GCATATTTTCATATTGATCTATCATATCCATTTTTTTTTCTCTTTATTTATGATTTTTTAGC
AATATGCACAAAACGAGAGGATGTATCTTCGTATGGTTCAAATCCTCTGCCTTAATGACA
CCACTGCACTGACATGCGGGGGTAATAGGATGGTCAGACCCATATATCGGTGACTGTAAT
GGTAGTGATATCATGGTAGATGATTCTCACCCAGACACCCATCTCTGGTAGAGTATATAT
ATATTGCGTATTTTGTGTTGTTGGTTAATCTTGTCTGCCGGGTGCATGTATACGTATACGG
CGGGCGCAGATAGATCGATCGAAATGGAAGAGGAGCAGCGGTTGCCGGCGGGGTTCGGGT
TCTTCCCCACCGACGAGGAGCTCGTCACCTACTACCTCGCCAGGAAGGCCATGGACGCCA
CCTTCACCTCCGCCGCCATCCGCGACGTCGACCTCTACACCTCCGATCCATGGCACCTCC
CATGTATGCCCTAGCTCTAGCTGATCATGATCATGTGATGGTGTCTAGCTCGTTGAGAGA
GAGAGAGAGAATTTGACAGTTAATTCTCGATCGATTGATGGAGATGATGACCATATATAT
GCGTGACGTGTTTTGCGATTAACTAATGCACAGGCGACTCGTCGGCGGCGAGCACCGGAG
GCGGCGGCGGCGGCGAGTGCTACTTCTTCTGCAGACGGAGCAGCAAGTACCCGTCCGGCG
CGCGCGTCCGCCGCGCGACGGCCGGCGGCTACTGGAAGTCGACGGGAAGGACAAGGGCG
TGTACGCTGCCGGCGGCGGCGGGCTCGTGGGGACGAAGAAGACGCTGGTGTCTACG
AAGGGAGGGCGCCGCGAGGGGAGAAGACGAGCTGGGTGATGCACGAGTACTCTAGAGCAC
CGAGCACCAACTTCATCAGAGGAGCTCAGGCACGTACACATAATCTTCTCGATATTATCT
ACGTATGATTAATTAGCTTCCCTTAATCCTCATGGCTCATGCACGAAGATGCTGTGATAC
AGTTCAAGTTTTCAAGATTCACACTTCTAAGTTCTAACTGTACTGGTGATATTCTTCTA
CTATTGGTACGTTGGTGATCCTAAGCAGTGAGTTGGTCGTGTCTGGGCTCCATTGATTTA
TCAGAATACTTGATATATATAAAAAAAGCGTAAATACATTAGGAATTTCAAAGATGTC
GACACAATTGGTTTCCAAAAATAATGGGTAGAATAGAGTACATATATATCGTGTGATTT
TGTGCAACTCTTAATTTGTAATCCCTCCGATTTTAAATGTATGACACCGTTGACTTTTTA
ATCAACGTTTTTACCACTCGTCTCATTCAAATTTTTTATGCAAATATAAAAGTACTTATGT
CATACTTAAAGAACATTTGATGATAAATGAAGTCACGATAAAATAAATTATAATTACATA
ATTTTTTTTAATAAGACGAAAGGTCAAACGTTTGTTAAAAAGTCAAAGACGTCATACATT
GAAATACGGAGGTATTACCTTACAATTCATTCTAATTTATACCTTTCAACTCCATCGCCA

```

ACTTTATCTAATTTTCCTTGATAACACATGTAAAAAGAAATAATCGATCGCTAGCAAACG  
 CTCTTTGTGTCATCAGGGCTCAACGATGCCGCTGGCTTCGATCGCCACTTGTTCGTAGTCAT  
 TGATTTAGGATGGTTGTATCTCAGCAATAGAAAGTGCTCCTACGGGGATCAGACGTTGAT  
 CGATGTTCTTGACGTGTTTTCAATTAATGTTTCCTCGGTGCAGAGCGAGTGGGTGATCTGC  
 AGGGTGTTCAGAAGCAGCCTCCAATTGAACACTGGCTGGAAATGGAGGAGGTGGAGACG  
 ACGACGACGACGACGACAGTGCAGGAGCACACGCCAAACCGGCGCCGTCTCCCTCCGGCG  
 GAGGCTGCGGCGGCGCCGCCGCCCGTCCGGTCAGCCGTGGCAACACACGAGTCGCCGG  
 TCCGGCGATGGCCGTGCTGCCATCGATGGTGGCAACCGTGAGGAGGAGGAGGATGAACAT  
 GGCCTGGCTCGAGAGGAGTCGTCGTCTCCGGTGGTCATCAGCTCACCATCACGCTGCACC  
 TCCTCACCGTCGTCTCGGCTTCTCAACCATGAGCACCTTGGTGCTTCGTCTCAGATGAC  
 CTGCCGGAGTTGATGGAGTTCGGCGACATCTACGGCGGGATCGCCGCCGGTGGCCCGACG  
 GACCAGCAGGCCCTCATCATCAAACCTCAAATTCATTGCAACTTCTCGACGAGCCATAC  
 TACTGCTGGAACCTTCTGAATTTCTGACAGTTCAGAACTTATATGTACGTATATTAATAA  
 TCACTCAATGTGCAGTCAGCATATGCAGTAATGTATATAAATGTTATTAGGCGTAAATCC  
 AGTTTTAGGTGCAAGCATGCATGTTTTCTGAACAGAGAATATGCATGTAGATCAATTGAA  
 ATGTGTAGTTTAGCATCTAGAATATACGGATTGATGCGTGTAAGAACACTGGGTGGAA  
 GTTGGTACCAGGATGTAGACATCTGGGACCCATATGCATGATCCAACCTCACTTTGTGTCA  
 TGACATACATACTTATCTCGGTACTCTTCTCCAAATTACGGGGAGTGCCTGTACTGTAC  
 ATGTACTAGCTGGTTTGGTAGCACAAATTGTTGTATAAAAAAGTAGTTATTATTGC

CDS

> **ONAC106**

ATGGAAGAGGAGCAGCGGTTGCCGGCGGGGTTCCGGTTCTTCCCCACCGACGAGGAGCTC  
 GTCACCTACTACCTCGCCAGGAAGGCCATGGACGCCACCTTACCTCCGCCGCCATCCGC  
 GACGTCGACCTCTACACCTCCGATCCATGGCACCTCCCATGCGACTCGTCGGCGGGCAGC  
 ACCGGAGGCGGCGGCGGCGGCGAGTGCTACTTCTTCTGCAGACGGAGCAGCAAGTACCCG  
 TCCGGCGCGCGCGTCCGCCGCGGACGGCCGGCGGCTACTGGAAGTCGACGGGGAAGGAC  
 AAGGGCGTGTACGCTGCCGGCGGCGGCGGGCTCGTGGGGACGAAGAAGACGCTGGTG  
 TTCTACGAAGGGAGGGCGCCGCGAGGGGAGAAGACGAGCTGGGTGATGCACGAGTACTCT  
 AGAGCACCGAGCACCAACTTCATCAGAGGAGCTCAGGCACGTACACATAATCTTCTCGAT  
 ATTATCTACAGCGAGTGGGTGATCTGCAGGGTGTTCAGAAGCAGCCTCCAATTGAACAC  
 TGGCTGGAAATGGAGGAGGTGGAGACGACGACGACGACGACGACGAGTGCAGGAGCACACG  
 CCAAACCGGCGCCGTCTCCCTCCGGCGGAGGTGCGGCGGCGCCGCCGCCCGTCCGGT  
 CAGCCGTGGCAACACACGAGTCGCCGGTCCGGCGATGGCCGTGCTGCCATCGATGGTGGC  
 AACCGTGAGGAGGAGGAGGATGAACATGGCCTGGCTCGAGAGGAGTCGTCTCGTCTCCGGTG  
 GTCATCAGCTCACCATCACGCTGCACCTCCTCACCCTCGTCTCGGCTTCTCAACCATGAG  
 CACCTTGGTGCTTCGTCTGTCAGATGACCTGCCGGAGTTGATGGAGTTCGGCGACATCTAC  
 GCGGGATCGCCGCCGGTGGCCCGACGGACCAGGCCTCATCATCAAACCTCAAATTC  
 ATTTGCAACTTCTCGACGAGCCATACTACTGCTGGAACCTCTGA

Protein

> **ONAC106**

MEEEQRLPAGFRFFPTDEELVYYLARKAMDATFTSAAIRDVDLYTSDPWHLPCDSSAAS  
 TGGGGGGECYFFCRRSSKYPGARVRRATAGGYWKSTGKDKGVYAAGGGGGLVGTKKTLV

FYEGRAPRGEKTSWVMHEYSRAPSTNFIRGAQARTHNLDDIYSEWVICRVFKKQPPIEH  
WLEMEEVETTTTTTTTVQEHTPNRRRLPPAEAAAAPPPSGQPWQHTSRRSGDGRAAIDGG  
NREEEEDEHGLAREESSSPVVISSPSRCTSSPSSRLNNEHLGASSDDLPELMEFGDIY  
GGIAAGGPTDQQASSSNSNSICNFLDEPYWCWNF\*

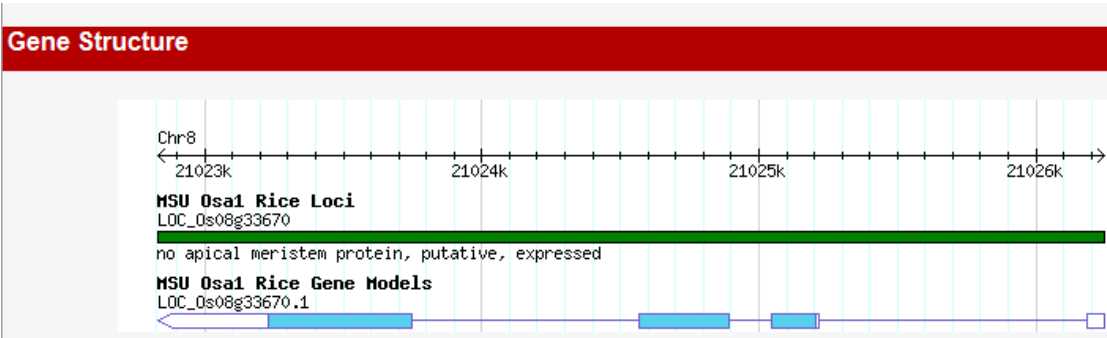

# **LOC\_Os08g40030 (ONAC107) sequence information**

**Genomic sequence length:** 2230 nucleotides  
**CDS length:** 1023 nucleotides  
**Protein length:** 340 amino acids  
**Putative Function:** CUP-SHAPED COTYLEDON3, putative, expressed

## Genomic Sequence

### > **ONAC107**

ATGGGGGACGCGCTGTGGGAGATGCTGGGGGAGGAGATGGCGGCGGCGGCGGCGGCGGCC  
GGCGAGCACGGGCTGCCGCCGGGGTTCAGGTTCCACCCACCGACGAGGAGCTCGTCACC  
TTCTACCTCGCCGCCAAGGTGTTCAACGGCGCGTGCTGCGGCGGCGTGACATCGCGGAG  
GTGGACCTGAACCGGTGCGAGCCGTGGGAGCTGCCGGAGGCGGCGAGGATGGGGGAGAAG  
GAGTGGTACTTCTTCAGCCTCCGCGACCGCAAGTACCCGACGGGGCTGCGCACCAACCGC  
GCCACCGGCGCCGGCTACTGGAAGGCCACCGCAAGGACAGGGAGGTGGTCGCCGCCGCC  
GCCGCCGGCGCGCGCTCATCGGCATGAAGAAGACGCTCGTCTTCTACAAGGGCCGCGCC  
CCGCGCGGCGAGAAGACCAAGTGGGTCTCCACGAGTACCGCCTCGACGGCGACTTCGCC  
GCCGCTCGCCGCTCCACCAAGGTAACACCCACCTGCATTGCCATTGTCATTGCCATTGCA  
TCTTTGTCTTTCTGAAAAAAAAAATCAGTTTCATGTCACTGTTCTGAACTTCTGAAGAAG  
ATAGCTGCTGCAACTAGTTCTTCAGAGTTCAGAGTAGATATTGGTGATTGGTGATTCA  
ATGTAGCATGCATGCATGCGTGCAAGAACACATAAGATGACATATGCATGCACAGATTGA  
TGCTGTGGTATGCTACTACTATGCTCTATGCACTTTTGTGCATTCAATGGTGTAATAAC  
TGTAATGTGTGCTGCTTGCTATACATTGGTACATCCTGCAGTGGTGGTAGTACAGTCTCA  
GCAGTGTGTGGAGTACTAGACTACTAGTAGGAGTAGTAGTTTATTTCTGCTCAAAATC  
TCCTTTGCACTGACACAAGATCCAAGCTAGTGTGATTCCCTCCCTCCTGTGTTTTGTTC  
CTTCAGGGTGGCTGTACTTTACATATCTCCAACCATTGACATACCTCGTCTCCAATCTTT  
CTTGTGCAGATCGTAAAAAATGTGTCAAATAGATAAACTATTCGTTGCAGCATTGCATCA  
ATATACAGCTAGTAATCCATGCCTCATGCTGATGCATGCTATGCACATCTATAGGGCCAA  
AAGAAAAGGAAGAAGAAACAAAGAAAGAAATCTCTGCAGAAGTTCAGAGCTAAATATATA  
AATATATATCTTAATATACTCTATGCTATATTTCTGTCCAACAAGATCACAATCCGTAGA

AATGAATACTATTAATTTGATCTTATGAACACTTCATCATAACTGAACTGACATGTAGA  
 CATTGGTTGTTTTTGATACTACTATCATGCAGGAGGAATGGGTGATCTGCAGGATCTTTC  
 ACAAGGTAGGAGATCAGTACAGCAAGCTGATGATGATGAAGAGCCCAGCCAGCTACTACC  
 TCCCAGTGAGCCACCACCACCCCAGCAGCATCTTCCATGACCTTCCTCCGGTCCCATTCC  
 CAAACCCTAGCCTCGTCCCCCTCCACCATGATCTCCCCACAAGCTTCCATCCTCCATTGC  
 TGCAGCACAGCCATGCGAACAGCAAGAACAGCAGCAGCAACAATGGCGGCTTCGTCTTCC  
 CCAATGAGCCAAACACCACAAACAGCAGCGATAACCACATTTCTTGCAATGGCGCCATGG  
 CTGCTGCTGCTGCTGCTGCTTTTCCTTCCTTCAGCTGTGCTAGTACTGTCAGTGGCAAGG  
 GGGGCCCCACGGCGCAGCTCGGAGTCAACGCCGGTCAACAGGAGCCACCGCCACCTACCT  
 GGATGGACGCTTACCTGCAGCACAGTGGATTCAATTTATGAGATGGGCCCCACCTGCAGTGC  
 CCAGGGGCGCATGATCTGGGCCGTTGGTTTCTTTAGGGCTACGATCTGGATATCCTTTAG  
 TTTGCAAGTGTTGTTATTTAGACAAGCACTTGTTTAGCTGCTTTGAAATTACTAGTGGTTG  
 TTAATTAATTAGTCATCATTTGGTTATTTTCATGCACTCAGGTGTGTACCTAGCTTGCAT  
 GCATGAGCTGCAAGCATTGGTGCAGTGGGTTGAGTATTACTACTAGTAACTACTTGCTTA  
 ATTACTACTAGTATTACTTTGTCTGTGAATCCATGCGTGCATGTATTCACATGCAATGTA  
 ATGGCTACATATATAATCAGCTAGTCTGTTTTGTTAGATGTTATGATAAGTGAACAATGG  
 ATTATATTCA

CDS

> **ONAC107**

ATGGGGGACGCGCTGTGGGAGATGCTGGGGGAGGAGATGGCGGCGGCGGCGGCGGCGGCC  
 GCGGAGCACGGGCTGCCGCCGGGGTTCAAGTTCCACCCCACCGACGAGGAGCTCGTCACC  
 TTCTACCTCGCCGCCAAGGTGTTCAACGGCGCGTGCTGCGGCGGCGTGGACATCGCGGAG  
 GTGGACCTGAACCGGTGCGAGCCGTGGGAGCTGCCGGAGGCGGCGAGGATGGGGGAGAAG  
 GAGTGGTACTTCTTCAGCCTCCGCGACCCGCAAGTACCCGACGGGGCTGCGCACCAACCGC  
 GCCACCGGCGCCGGCTACTGGAAGGCCACCGGCAAGGACAGGGAGGTGGTCGCCGCCGCC  
 GCCGCCGGCGGCGCGCTCATCGGCATGAAGAAGACGCTCGTCTTCTACAAGGGCCGCGCC  
 CCGCGCGGCGAGAAGACCAAGTGGGTCCCTCCACGAGTACCGCCTCGACGGCGACTTCGCC  
 GCCGCTCGCCGCTCCACCAAGGAGGAATGGGTGATCTGCAGGATCTTTCACAAGGTAGGA  
 GATCAGTACAGCAAGCTGATGATGATGAAGAGCCCAGCCAGCTACTACCTCCCAGTGAGC  
 CACCACCACCCCAGCAGCATCTTCCATGACCTTCCTCCGGTCCCATTCCCAAACCCTAGC  
 CTCGTCCCCCTCCACCATGATCTCCCCACAAGCTTCCATCCTCCATTGCTGCAGCACAGC  
 CATGCGAACAGCAAGAACAGCAGCAGCAACAATGGCGGCTTCGTCTTCCCCAATGAGCCA  
 AACACCACAAACAGCAGCGATAACCACATTTCTTGCAATGGCGCCATGGCTGCTGCTGCT  
 GCTGCTGCTTTTCTTCTTCAGCTGTGCTAGTACTGTCACTGGCAAGGGGGGGCCACCG  
 GCGCAGCTCGGAGTCAACGCCGGTCAACAGGAGCCACCGCCACCTACCTGGATGGACGCT  
 TACCTGCAGCACAGTGGATTCAATTTATGAGATGGGCCCCACCTGCAGTGCCCAGGGGCGCA  
 TGA

Protein

> **ONAC107**

MGDALWEMLGEEMAAAAAAGEHGLPPGFRFHPTDEELVTFYLAAKVFNGACCGVDIAE  
 VDLNRCEPWELPEAARMGEKEWYFFSLRDRKYPTGLRTNRATGAGYWKATGKDREVVAAA  
 AAGGALIGMKKTLVIFYKGRAPRGEKTKWVLHEYRLDGDFAAARRSTKEEWVICRIFHKVG

DQYSKLMMPKSPASYLPLVSHHPSSIFHDLPPVPFPNPSLVPFHDLPTS FHPPLLQHS  
HANSKNSSSNNGGFVFPNEPNTTNSSDNHISCGAMAAAAAAFPSPFSCASTVTGKGGPP  
AQLGVNAGQQEPPPTWMDAYLQHSGFYIEMGPPAVPRGA\*

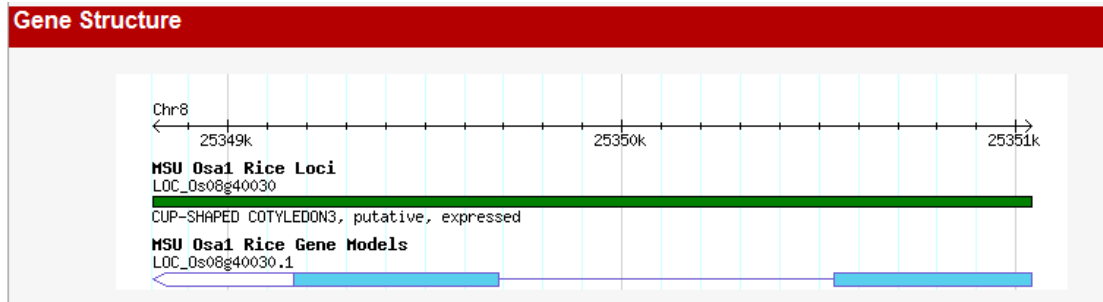

### LOC\_Os09g24560 (ONAC108) sequence information

**Genomic sequence length:** 1588 nucleotides

**CDS length:** 903 nucleotides

**Protein length:** 300 amino acids

**Putative Function:** No apical meristem protein, putative, expressed

## Genomic Sequence

## > ONAC108

CTGGTAGAGTGGTAAATTGCTCGCGCGCATTCTGCATGCATGAGCGCGCGCGGCGGTGTCA  
CGATGGCAGGAGGCGGAGGCGGCGACCGCGCGCCGTCGTCGTCGACGGCGATGATCT  
CGCGACTCCTGCCGCCGGGCTTCCGGTTCCGGCCGACCGACGGGGAGCTCGTCGCCCCT  
ACCTCGCCCCGAAGGCGGCCGACGCCGGCTTCACTCCGCCGCCATCCGCGACGCCGACC  
TGTACCGCGCCGAGCCCTGGGACCTCCTGCCGCCGCCGCGTTGTTAGTCGATCGATTGCG  
ACGAGACATTGCTGCGTGCGTGCGTTGGCTTTGATCGATGTGTGTCGTCGTCGTCGTCG  
ATGTGTGCAGGTGATGCGGCGGCGGAGGAGGAGGAGGAGGAGGAGGAGGAGCGGTGCGGCTAC  
TTCTTCTGCACGAGGAGCTTCAGGTGGCCGTCGGAACGAGGACGAACAGGGCCACGGCG  
ACCGGGTACTGGAAGTCGACGGGGAAGGACAAGGCGGTGCTGCACGGCGGCGGCGGCGGC  
GGCGGCCGCCCGTGGGGGTGAAGAAGACGCTCGTGTTCTACAGGGGAGGGCGCCGAGG  
GGCGAGAAGACGAGCTGGGTGTCATGCACGAGTACCGCCTCCTGCACGGCGGCGCGCGGCC  
ACCGCCTCTTCTTCCCCGACGCCGACGACAGTTGTGCCCCGCGTGAGTGAAATGCAACAG  
TTCGAATGTCTTGTGCGACTGAATTTGTAAACGTTTTCACTAAATTGGATCGAATTTTCT  
GCTGAATTCTGTTGTTTTTGTAGAGTGAGTGGGTGATTTGCAGGGTGTTTCGTCAGGAAG  
ACACCAGATGGTAACAACGATAGGGGAACACAGAACATCATCTTCCCTCCGACGACGCT  
CATCTCCGTTTCGTCGCCGGCGCCGGCGAACTCTGTGGACGGCGCAGGCCATGCGAGCTGC  
AGCTTCTTCTCCGGTGCTAATGAGTCCATGGCGCCAAGCGACCATTCAACATAGGAGAC  
GACATGATCCTCCATGGCCACGACGAGGAGGAGTTGCTGATGATGAACTGTTCTTCGGCT  
TTTGATCTGCCAGAGCTTCTCGACTACGAGAGCTTCTCGCTGGACCTTTGATCCAACGAG  
CAATGGCATGTTCTAAAATCTAAAGTATGATCTGGTTACTTCTCTTAATACAAAAGATAC  
ATAAGTCTTTTGCGTATTCTCCAAAAAAATCTGAAGGATGATGCAGCTAGCTAGCTAGC  
TAGCTAGATCGATCAATCGAGATATATATGAAGGCCATAATTTGATCATTAGATGCATAT  
GCATCATCCATGTCTACTTCTTCAGATCACTAGCTACTTAATATGTCCCCTCTCTGTAAT  
TAAACTTGCACGTATCTGTATATATATTTGTACTGTAGTCATTCATGTAATATACGTTTT

GTGTTTGCATTTTATACACGCCTCTATTTTCAGGCGCTCTTAGCATTTCCTTTTACTTTC  
TTAGATTATAAAAACTAGTGTGTGGTTGTGTGTTTTTGCTATGTACATCTTACTTATATA  
GAGAGTTAAATAAAAACTCTACTATCTT

CDS

> **ONAC108**

ATGAGCGCGCGCGGGCGGTGTACGATGGCAGGAGGCGGAGGCGGCGACCGCGCGCCGTCG  
TCGTCGTGCGACGGCGATGATCTCGCGACTCCTGCCGCCGGGCTTCCGGTTCCGGCCGACC  
GACGGGGAGCTCGTCGCCCACTACCTCGCCCCGAAGGCGGCCGACGCCGGCTTCACCTCC  
GCCGCCATCCGCGACGCCGACCTGTACCGCGCCGAGCCCTGGGACCTCCTGCCGCCGCCG  
CGTTGTGATGCGGCGGCGGAGGAGGAGGAGGAGGAGGAGGAGCGGTGCGGCTACTTCTTC  
TGCACGAGGAGCTTCAGGTGGCCGTCGGAACGAGGACGAACAGGGCCACGGCGACCGGG  
TACTGGAAGTCGACGGGGAAGGACAAGGCGGTGCTGCACGGCGGCGGCGGCGGCGGCGGC  
CGCCCCGTGGGGGTGAAGAAGACGCTCGTGTCTACAGGGGGAGGGCGCCGAGGGGCGAG  
AAGACGAGCTGGGTTCATGCACGAGTACCGCCTCCTGCACGGCGGCGCCGCCGCCACCGCC  
TCTTCTCCCCGACGCCGACGACAGTTGTCGCCCGCAGTGAGTGGGTGATTTGCAGGGTG  
TTCGTCAGGAAGACACCAGATGGTAACAACGATAGGGGAACTACAGAACATCATCTTCCC  
TCCGACGACGCTCATCTCCGTTCTGTCGCCGGCGCCGGCGAACTCTGTGGACGGCGCAGGC  
CATGCGAGCTGCAGCTTCTTCTCCGGTGCTAATGAGTCCATGGCGCCAAGCGACCATTTC  
AACATAGGAGACGACATGATCCTCCATGGCCACGACGAGGAGGAGTTGCTGATGATGAAC  
TGTTCTTCGGCTTTTGATCTGCCAGAGCTTCTCGACTACGAGAGCTTCTCGCTGGACCTT  
TGA

Protein

> **ONAC108**

MSARGGVTMAGGGGGDRAPSSSSSTAMISRLLPPGFRFRPTDGELVAHYLARKAADAGFTS  
AAIRDADLYRAEPWDLPPPPRCDAEEEEEEEEERCGYFFCTRSFRWPSGTRTNRATATG  
YWKSTGKDKAVLHGGGGGGRPVGKKTLVFYRGRAPRGEKTSWVMHEYRLLHGGAATA  
SSSPTPTTVVARSEWVICRVFVRKTPDGNDRGTTEHHLPSDDAHLRSPAPANSVDGAG  
HASCSFFSGANESMAPSDHFNIGDDMILHGHDEEELMMNCSSAFDLPELLDYESFSLDL

\*

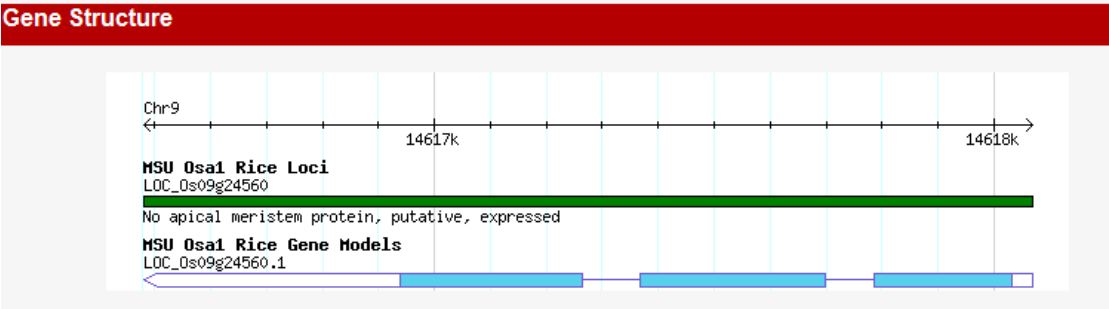

**LOC\_Os09g38000 (ONAC109) sequence information**

**Genomic sequence length:** 2346 nucleotides

**CDS length:** 1101 nucleotides

**Protein length:** 366 amino acids

**Putative Function:** no apical meristem protein, putative

## Genomic Sequence

## > ONAC109

TTGTAAGAAAAGGTTTCAAGCTTCTTGTGAGGGTGATCAGGGAATCTGCAAAAAGAGGAGGCCAA  
GGTGGCCATCCGATCGACCAAAATCTTGTGGGAGGGATGACTATGTCGACCGGTGTCCCT  
ACTACTGTGCCTCCTACCCAGCATTAGCTGCCTTGAAAAACCTACTTATAAGGGTGGTG  
GCAGCAGCAGCTGGGAAAGGCCTCAGCAGCAGCGCAGAAGAAGCAAGGTGTCTTTGGGCA  
AAGCTGCCGGCGCCGGAGGAGGAGGAGGAGGCCGGCCAGCAGCCGGAGAGGCCGCCGTCTG  
TCATATCGGCGGCCACCGACATCGACGTTGATGGCGCCGGTGGGGCTCCCTCCGGGGTTC  
CGGTTCCACCCGACGGACGAGGAGTTGGTGAACCTACTACCTCAAGAGGAAGATCCACGGT  
CTCAAGATCGAGCTCGACATCATCCCTGAAGTCGACCTCTACAAGTGCAGCCATGGGAG  
CTCGCTGGTAAAGTGATCATGCATGCCTGCATATATATATATATATATATATATATATA  
TATATATATATATAATCAATCCTGATGATGAACAATTGAACACATGCTGATTAATATGAT  
CGATGACATGAGATGTCGATGATGATGATGATGATGATGATGATATGGATGGAATTATTTGCA  
GAGAAATCGTTCTTGCCGAGTAGGGATCCGGAGTGGTATTTCTTCGGGCCTCGGGATCGG  
AAGTATCCGAACGGGTTCAGGACGAACAGGGCGACGAGGGCGGGGTACTGGAAGTCGACG  
GGGAAAAGACCGCGGGTGGTGCACCAGCACGGGGGGCGCGCCATCGGGATGAAGAAGACG  
CTGGTCTACTACCGCGGCCGCGCGCCGAGGGCGTCCGCACCGACTGGGTCATGCACGAG  
TACCGCCTCGACGACAAGGACTGCGAGGACACCATGCCCATCAAGGTATATATCTATCTA  
TCTATCTATATTCTATCATCTTAGTTTTTAGCTACTACATGTGTATATAGATCGATCTAC  
CATGTAAATATATTTGCTAAATTGACTTATATCTCTTTGATGACTATTTCACTCATCATG  
ATCAATGATCAGTCACGGTCATGATCATACTGTGATATAGGGCAACGATCCTAGCTAGAC  
AGCTACTACTAGATTAATTGCTTGAAAACTGCTAATTGGTCAGCTATAATAAGCTAGGT  
TGGGTATAGTAGCTAGGGCTTTGAGAATTTGATCCCTTTCTTTTCGCCCTTGACAAAGAAA  
ATTTCTGGGAGGGAGTAAAATTTAACTTTTTTGATCTGTTCTGCAGTAGAAGTACTAAC  
TTCCAAGTGATGTAATAGTGTATTACTACTACTAGTTATGTGACATGTATCCCTTTGCTT  
TATGATCTACTCCAAATGCATGAGACAAATCTGTAGTCTAGCTTACTGGCCTGTGAAAAA  
CACAAAGCCAGGCCAGGTCTAAGGAGCACTAGTAATGCTGCGTTCTTTGGTGAGTTACAA  
CTAATCCTCCCTTTAATACTGAGATGAGCAGACACTGATCTGAATAGGGCAGTGCATTGA  
TCATGAGACATTAAAGCGCAGAGACAAAGCAAAGCCAAGAGCTTCTTCTCGATCTCCAGC  
CTCTTCCCTCTCAAGGCCATGCATGTGCGGTGTGCGCTGCTTTCCACTTTATTCCACGCTG  
AATCCATCATCATACTCGCATCCTCCCCTTCCTACCCGGCTGGCCGTCTTCTTTAATTCT  
CTCTTATTAACCTTATCTCTCTTTCTAACTAATAAGAACACCATTATGACACTAGTGTGTT  
AAAGAATTAACCTTATGCTTGATTTGCTCAAACCAAATGGACCAATTGATTGCCAAAAGA  
TTGCACATGAATCTACATCATAATTTCTCAGAAAGCTAGATATATAGGTACAGATATAAT  
CATGCATCAGTGTGGCGGTGTGCTTAAATTAACCTTTTCGAAAGACTGAGAATTCATATGT  
TAATGGAGCTTAATATAATTTGTTGCTCATGATCAGGACACTTACGCGTTATGCCGGGTC  
TTCAAGAAGAACGCGATCTGCACCGAGGTGGAGGAGCTGCAGGGGCGAGTGCAGCATGGCG  
CTGCTGGAGGGCGCCTGCCAGCAGCTGCTCGCCAGCGGCGGCGGCGGCAGCCAGGAGCAG  
TACGAGACGCCGTCGCCGCCGACGTCCTCCGTCGGATCAACCTTCGGTGGGGCCGACGCC  
GACGCCGAGGACGACCCCGACAAGGACGACTCCTGGATGCAGTTCATCTCCGACGACGCC  
TGGTGCTCCAGCACCGCCGACGGCGGCGCGGAGGAGACCTCCTGCGTGGCCCTCGCC  
GGCTGA

CDS

> **ONAC109**

ATGGAAGAGGTTCAAGCTTCTTGTGAGGGTGATCAGGGAATCTGCAAAAGAGGAGCCAAA  
GGTGGCCATCCGATCGACCAAAATCTTGTGGGAGGGATGACTATGTCGACCGGTGTCCCT  
ACTACTGTGCCTCCTACCCAGCATTAGCTGCCTTGAAAAACCTACTTATAAGGGTGGTG  
GCAGCAGCAGCTGGGAAAGGCTCAGCAGCAGCGCAGAAGAAGCAAGGTGTCTTTGGGCA  
AAGCTGCCGGCGCCGAGGAGGAGGAGGAGGCCGCCAGCAGCCGAGAGGCCGCCGTCG  
TCATATCGGCGGCCACCGACATCGACGTTGATGGCGCCGGTGGGGCTCCCTCCGGGGTTC  
CGGTTCCACCCGACGAGGAGGAGTGGTGAAGTACTACCTCAAGAGGAAGATCCACGGT  
CTCAAGATCGAGCTCGACATCATCCCTGAAGTCGACCTCTACAAGTGCAGCCATGGGAG  
CTCGCTGAGAAATCGTTCTTGCCGAGTAGGGATCCGGAGTGGTATTTCTTCGGGCCTCGG  
GATCGGAAGTATCCGAACGGGTTTCAAGACGAACAGGGCGACAGGGCGGGGTACTGGAAG  
TCGACGGGGAAAGACCGGCGGGTGGTGCACCAGCACGGGGGGCGGCCATCGGGATGAAG  
AAGACGCTGGTCTACTACCGCGCCGCGCGCCGAGGGCGTCCGACCGACTGGGTCATG  
CACGAGTACCGCCTCGACGACAAGGACTGCGAGGACACCATGCCATCAAGGACACTTAC  
GCGTTATGCCGGGTCTTCAAGAAGAACGCGATCTGCACCGAGGTGGAGGAGCTGCAGGGG  
CAGTGCAGCATGGCGCTGCTGGAGGGCGCCTGCCAGCAGCTGCTCGCCAGCGGCGGGC  
GGCAGCCAGGAGCAGTACGAGACGCCGTCGCCGCCGACGTCCCGTTCGATCAACCTTC  
GGTGGGGCCGACGCCGACGCCGAGGACGACCCCGACAAGGACGACTCCTGGATGCAGTTC  
ATCTCCGACGACGCCTGGTGCTCCAGCACCGCCGACGGCGGCCGAGGAGAGCACCTCC  
TGCGTGGCCCTCGCCGGCTGA

Protein

> **ONAC109**

MEKVQASCEGDQGICKRGAKGGHPIDQNLVGGMTMSTGVPTTVPPTPALAALKNLLIRV  
AAAAGKGLSSSAEEARCLWAKLPAPEEEEEAGQQPERPPSSYRRPPTSTLMAVGLPPGF  
RFHPTDEELVNYLKRKIHLKIELDIPEVDLYKCEPWELAESFLPSRDPEWYFFGPR  
DRKYPNGFRNTRATRAGYWKSTGKDRRVVHQHGGRAIGMKKTLVYYRGRAPQGVRTDWM  
HEYRLDDKDCEDTMPKDYALCRVFKNAICTEVEELQGQCSMALLEGACQQLASGGG  
GSQEYETPSPPDVPVGSTFGGADADAEDDPDKDSSWMQFISDDAWCSSTADGGAEESTS  
CVALAG\*

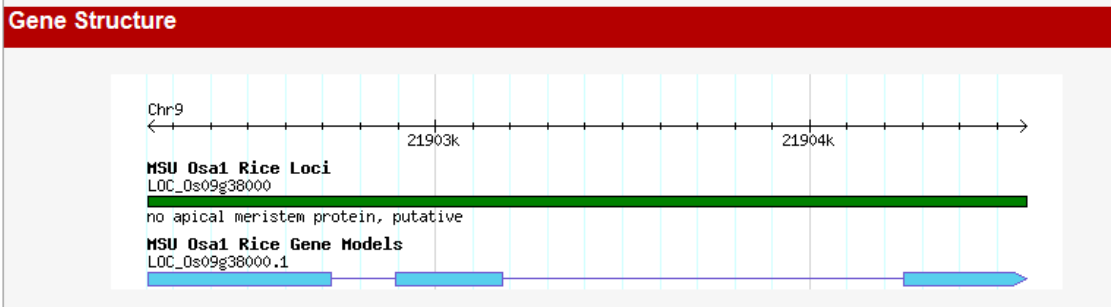

**LOC\_Os09g38010 (ONAC110) sequence information**

**Genomic sequence length:** 2579 nucleotides

**CDS length:** 657 nucleotides



**Protein length:** 218 amino acids

**Putative Function:** no apical meristem protein, putative, expressed

#### Genomic Sequence

##### > ONAC110

```
CATGGCGCCGGTTGGTCTCCCTCCAGGCTTTAGATTTTCATCCAAGTATGAGGAGCTTGT
GAACTACTACCTCAAGAGGAAGGTCCATGGCCTCAGCATCGACCTCGACATAATCCCAGA
AGTAGACCTCTACAAATGTGAGCCCTGGGAATTGGAAGGTAATCCGAAAACCTAATTGCT
CATCCATGTTCTCACTTCTCATCATCACTCCTGAATCCTGATTCGGCTCGAGATGTTTTA
TTTGTCTTCTTGTGTTTTGAAAAGAGAAATCCTTCCTGCCTAGTAAAGACTCCGAGTGGTACT
TCTTTGGGCCAAGGGATAGAAAAGTATCCCAATGGATGCCGCACAAACCGTGCAACCAGAG
CAGGATACTGGAAATCGACGGGGAAAAGATCGGCGGATCAACTACCAGAACAGGTCAATTG
GTATGAAGAAGACACTAGTCTACTACAAAGGTCGAGCTCCTCAGGGGATTAGAACCAGTT
GGGTGATGCATGAGTACCGCATCGAGGAAAAGCGAATGCGAGAACGCCATGGGGATTCAGG
TTATTCATCCATCCTCCTCACCAGCTGTTAGTCTCAGTTAAATCATTTTGAGTTGTATCT
GCTATACTTGGTTAGCTGAGGCTGCATTTTCAGAGTATCAAGCATAGCCAATCTTCTCAGT
TAGCAGGATTTGTATGTATTTATGTTATGCAATAGTGATCATATTTTCATAATATGCAATA
TTTGAGATATGTGCCTGCTAAAAACAAAATTGGCAATAGAAACATACAGAAGAAACAATA
GGGCATATTTGCTAGTTCAGGGAACCTACGTTCTTTATGCATGGAGTGCATGAAAAGTTA
GGGCTCTTCTCTCTTCTTTTCCCCCATATCCATCAGTGATAGCCATAAAGTATTCCTTGC
TTCCATGGACCATAGCTACTTTACAAAGTACATTAGAAGGTTTTCTCAGTTCTCTAATGG
GTCACACATGGTTCACTTTTCTAGGTGCTCTTGATAAGACAAATTTAACATCCAATTCTT
GGTTCATGTGCGGATGATGTGAAATCCTACAACATGATTGTACAGGGGTTAGGTGCGTCA
TCGTTTCATGATGCAGAGTATAAAAAATCTAGGTCAGTTGCATGTTGATGCTACCTTAAAG
CTTAGACATCCTTCAGTGTGGCCCTGTGTAGTGTGCGGTGGCTTTACACTTTATTCTCCCC
GTCAACCTCCAACCTTACTCACTAGTGAAAACCATAACTGAACATGAGGACTGATCCCAT
GTTTATTGTAAATTAGATCAAAGTGCACATAGTGATACATATTGTATGTCCACTCTTAAA
TTTACATTAGTCGTGTTGGAAGACTCTGCATTAGTTGAACTGTTGACATTTATATTAAGT
AAACATAGAGTTCAACCAAAACCATTTGGTGACTGAAACATAGTCCGATTTCAAACAAGTG
GAATCTTGAAATAGCAATTCAGCAACTACCTTAATAAAAACTGCTCAAAAGTTATGGGGT
TGTTTCAGATTGATGCTATTTTCAACCATAACCATTTTTTGGTAAAGTTACCAAAAAAATG
TCTACGTTTAGTTTGTGCTAAATTTGGTAAATACATAAGAAAATTTTGGCAATATTGTC
ATCTTGCCATTGCCAAAATTTGGTAAAGTTTATTTTGGTTACAATCTAAACAAGCCCTAT
GATTGATGGTCTAAGAGAAATCAATAGCAGCATAAAATCAAGTTGCAATTTTATACTGT
TCCCTGCCGAACCTGAAGTTGAATCCTCAAGAATTTTACTCTAAATTTGTTTAGTACTGA
TAATGAACATTCAATCCAAATTTGAAAATATGCACATGTAAATTAGCAAACAACAAGCGTA
GAATGTAGAAGCATATAATCCATTAACCTTTGTAAGATTACAGCTGTATATTATCAGTAAA
CAGAAAATTAAAGAAGCACCTTACTTCGGTTCACTAGTGGCTGAAATAATTTTTCATCC
ACATTGTTGAACTTGAAATCTCCCCATGATTCCAATGTAGAAAAGTCCAACCTGTGCAAA
AGGAAAATAAGTAATTTAGATCATTTTATTCATTTTCATCATTTTAGTTACAGGACTCCTA
TGCGCTATGTCGGATTTTCAAGAAGAATGTGGTGTGGGTGAATTTGACAAGAAAGGGGA
GTGCAGTTCATCACAGGCTAAAGGAAATGAAGAAGTTACAGATTTTCGGGGATGCTGGACA
ATCCTCGGGAGCAAATGAGAATGATAAAGACAATTCATGGATGCAATTCATAGCAGAGGA
TCTATGGTGCACCAACAACTAAAAGTGAAGTGAAGTGAAGTGAAGTGAAGTGAAGTGAAG
TTCATCTAACCAGATATTTTCGGTATTAGTTATACTGCGTGTATCTTCTGTATATGTTTGA
```

TAAGGACACTTCTCACTTTGCATAGGAGGACCACTTTAAGTTTGGATGCTGGTTCTTAAA  
TTAGGTTTATACTTTTGTTCCTTTAGTACTGTATAATATATCTAAAATTGTGCTACTTTG  
TACTTCAATCTTCAATTAACATGTACCTATCATCTAATGAAATGATACAAAAGGAGAAA

CDS

> **ONAC110**

ATGGCGCCGGTTGGTCTCCCTCCAGGCTTTAGATTTTCATCCAACCTGATGAGGAGCTTGTG  
AACTACTACCTCAAGAGGAAGGTCCATGGCCTCAGCATCGACCTCGACATAATCCCAGAA  
GTAGACCTCTACAAATGTGAGCCCTGGGAATTGGAAGAGAAAATCCTTCCTGCCTAGTAAA  
GACTCCGAGTGGTACTTCTTTGGGCCAAGGGATAGAAAGTATCCCAATGGATGCCGCACA  
AACCGTGCAACCAGAGCAGGATACTGGAAATCGACGGGAAAGATCGGCGGATCAACTAC  
CAGAACAGGTCAATTGGTATGAAGAAGACACTAGTCTACTACAAAGGTCGAGCTCCTCAG  
GGGATTAGAACCAGTTGGGTGATGCATGAGTACCGCATCGAGGAAAGCGAATGCGAGAAC  
GCCATGGGGATTACAGTACAGGACTCCTATGCGCTATGTCGGATTTTCAAGAAGAATGTG  
GTGTTGGGTGAATTTGACAAGAAAAGGGAGTGCAGTTCATCACAGGCTAAAGGAAATGAA  
GAAGTTACAGATTTCTGGGGATGCTGGACAATCCTCGGGAGCAAATGAGAATGATAAAGAC  
AATTCATGGATGCAATTCATAGCAGAGGATCTATGGTGCACCAACAACTAAAGTGA

Protein

> **ONAC110**

MAPVGLPPGFRFHPTDEELVNYYLKRKVHGLSIDLDI IPEVDLYKCEPWELEEKSF LPSK  
DSEWYFFGPRDRKYPNGCRTNRATRAGYWKSTGKDRRINYQNRSIGMKKTLVYYKGRAPQ  
GIRTSWVMHEYRIEES ECENAMGIQLQDSYALCRIFKKNVVLGEFDKKGECSSSQAKGNE  
EVTDFGDAGQSSGANENDKDNSWMQFIAEDLWCTNKLK\*

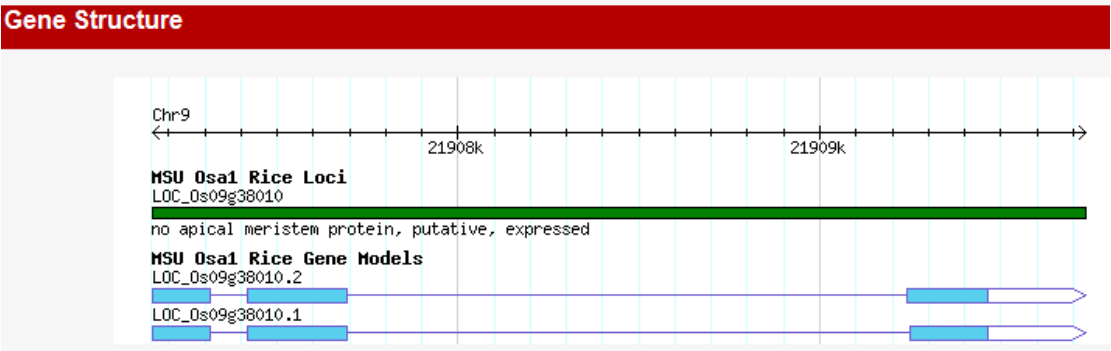

**LOC\_Os10g09820 (ONAC111) sequence information**

**Genomic sequence length:** 3642 nucleotides

**CDS length:** 1491 nucleotides

**Protein length:** 496 amino acids

**Putative Function:** no apical meristem protein, putative

Genomic Sequence

> **ONAC111**

ATGACAGCGGAGAGCAATGGCGGCAACAGCTCGGCGGCGGCGACGACGGCGAGCAATGGA  
GGCCGGCGGAGACACGAGCTGGTGCCGAAGCTACGATTGCCTCCAGGCTACCACTTCGTG  
CCCTCGGATGAGGAGCTCGTCGACTTCTACCTCCGCGGCAAGATCGAGCAACGTAGGCCG  
CCCATGGACTTCATCAACGAGGTTGACATTATGAGCTTCGATCCAGTCAAATTGATCGGT  
AACCAATCTTTTTTATTTCACTTTATTTGTAATATGAAATAATTGATCAACCATTGCACA  
TGTAACCATAATTTACATATATTTACACATCTATGATAATTAAATAACAAACTGTGGTGA  
TATGAGTGCATGCACTGCACATGCATGGGCAATTGCTTGTAGAGAAATACAAGGGTTACG  
GAGAGAATAGATGGTACTTCTTCACAGTGAGGAAACCATCGAAGACGAAGAAAAAGGACG  
AGCCAAATAGGAAGGTGGTGGTGGATGGGGTAGAGGAGGGAAGCTGGAGCGCGACGGGGA  
GCGTGGCATATATCTGTGGGAAGGATCACGAGACTGTCATTGGCACCAAGAGGGTTCTCA  
CCTACAAATCAGCTCGCTCTGCTGAGGAGGACAAGTGGAGCATGCATGAGTATGTCATGT  
TAGATAAATCCCAGGTACTTTATATATGCTTTCGTTATATATTTTATATTCTTTCGTTAT  
ATATTTATAAATAGCACGTATGAAATTTTATACCATATATAGTTTTATTGATATATATGT  
GTTGTTTTATACTGATTGGTATGAATTACCCCTTAAATTTAGGATAAGAGAGCTAGAAAT  
TTCTACGTAGAAAAATTCACATATTAATATAGAGAAGTGAAGTAAATATACAGGCCGCG  
CATAAATTTGAATTGAGGTGTCATTAATCAGATCTGTTAACATGTAAATACACACCTAG  
ATCCCTAATATTTGTTTAGAGCTCGGGCAAAGTGCAGATGACGTGTCCTGGGTTGCTTAC  
ATGGTTGTGTCCATGGTGGTGAGAATTTGCATTTAGCCTCCCTTCCCCACTACAGCTAG  
TATGCCCTAAAAATCGACTCTCACCCTCTCAAATCACTGCCTATCAGCTATGTGGGAGAG  
AAAGCAAAGAGATGATGAATAGGGCGACTACGATAGCTAGCGATGGAAGTTCCCCGGGGA  
TGAGATAGACGGCACAATAGCGAGAGGGTGATCCCACAATCATCAACTATCTCCACCACC  
ATAGTTTCCCTTCTCTTCCACGGGGGCGATGGGAGTCGATTTGAGGGGTGGTAAAGTTT  
ATTTTAGGGCATACTGTGGGTGAGGGGACTAAATACAAAATTATCACCAACGTGATGAGC  
GACCACGTCAGTGCCTGAGCTATGTCATCTACACTGTTAATCAAAGGAAAGAAATTACTT  
GACTATCTATTCTTTATTGATCAGGAAATAATAATCATGCGGTTGGGATGAAACCTGCT  
ACGAGCTTGTCCAATTCAAATGAAGATTGACATGTATTACTCCATAGATAAATAAGTATC  
CGAGACAATCACAAGAATTTGAATGCAACATTTGTATATGTAACATTTTCTAGAACACGT  
TGGCATATAAGACTGTACCTGCACACAAACCTTATGGAGATGTACTAGCTAGGATGATTG  
CATGCATGCTGTATATGTGAAAAATATGAAAAATAGGTGATAATATTATTTGGCATCTTATT  
TCTGCATGGAAGTACAAGCTTTAATTAACACAATATTGGTACTGGTACAGCTTAGAATTT  
TAAAGTATGGCATGCTTTGCCTTTATGCAATGCATAATAAGAAGTTTTACTTTTAAAAAT  
AGAACTACATACCTATATAAGTATTCACAATTTAATACAAAGTTTCTGAAATTTAGGTGCG  
ATCTACTGATCGACGGGTCCTAGTAGCTAGGATGATGCGTGAATTTATTTAAATATAATA  
TAGCAAAAGCTGTTCAAATTCAAAATATATTTAATTCTAAGATTTATGAATTCCTTTTGA  
TAGTTTCTAATTATAGGATTTCTGAATTCCTTTTCAAAGTTTCAGTCACCCAAATATTGT  
TTTTGTACATGTTCCGAGATTGTGATAAATATATACTACCGTAAGTTGATATATGGAAGT  
GTTATTAATCAACACTTCCAACAATATTTGAGCTTTACATTATCCTAAGCAGTAGTTTAC  
TATCTAGCACAGGGAATTGCACTTATCTAGAATTGCTATATATATTTTGGACAGATACG  
GAGTCTTCCCTCTGTCCATAAAAAATAAAAAAACAGGTTTAACTTAGCAGAGGAAGTA  
ATTAATAGTGCTCAATTAGAAAATAATTAACATTGGCCTACCATACTTTTTTATTAACGTT  
GGCCCTTTCATTCACTACAAGATCCTGGATACAACCTAGGGATACAATGTCGGTAAGCG  
TAAAACGTTTTTTCTCCCCCATTTGTTACTACAATGGCTTTGACTTCTTTCAAAAAGAAA  
AAGCATATATGCACAAATGCCATTGCCAGTAAACATGTAAATGTATTGCCTTGCTACGAC  
CGTGGAACATGACATCCATATAAACCACCAGGCTGGTAGCTTTATATACTACGTAATTAG  
CTCTTAATTATTGCATCAATGGCATGCCATGATCGATTAATATGTTTGCAGATGGATCAA

TATGTTCTGTGTGCGATACAGTTGAAGCAGACATACGAGGCTGAAAAGAAGGCCAGGAG  
 GAGGAGGAGAGAGGCGTCAAACGCAAGAGAACGGCAACGAGGAAGAGGAGAAAAGGAGAC  
 ATTGATCAAACACTTCCCAGGAGCAAGAAGATCAGCAGCAGGAGACACCACCACCTGGA  
 GATCCTCATGATCAATCCGTTGTAGATGCCCCCTATTATTCCACGCAAATGGCGTTAGGA  
 GGAGAAGAAGAAGTTGCGCCAGTTCCATGGTGGCGCGATTGCATGGCGCAACCTGATCGA  
 ATCGAATATCCTGCAGTGTGGTACAATCAGCAGGAGCAACAGCCATCGCAGTTAGTTGAT  
 CGATCGATGATGACACAAGGCTACATTGGAGATCTTTCTTACATTGAGAATCAATTTGAT  
 CAACAGCAGGCACATGATCATGGTAGCATTAAATGCATTTGACGAGGCTCTCGACCAATGC  
 CATGACACCAATTTTCGCATGGGATAATGCTGGTATCTATCCTGGAAATAACTTGCTAGAT  
 GGCAACTTGATGATGATACTCAGGATCAGTTTGGCAATCAATCTACTCTTGGTGCATTA  
 ACTGGAGAATTAGAGTATGGCACGGGCTACCAGTTCCATGACGCACTCCAGGCTACGCCA  
 GGTCTGATGATGCATCTGCTCAATCCATGGGAATTCAACCTGCTGCTGGACATTCCATG  
 GGAGATGATGATGAGACATGCTGTAATGATGATTTGTCGTCACCTCTTGCTGATATTTTCG  
 AGAATCTTACTAGATGGCAATGGTGTATAAAACAATGAAGGAAACCCAGAGGGAAGTAAT  
 CAGGGCTTGACATCTGCAAAGATGGACACCAATGGCCGTTAGAAGAGAGCACAATGCCA  
 ACGGTTGAGTGTGTTCTGCAGCATCCTGGAGAGTCTGCCTGA

CDS

> **ONAC111**

ATGACAGCGGAGAGCAATGGCGGCAACAGCTCGGGCGGCGGACGACGGCGAGCAATGGA  
 GGCCGGCGGAGACACGAGCTGGTGCCGAAGCTACGATTGCCTCCAGGCTACCACTTCGTG  
 CCCTCGGATGAGGAGCTCGTCGACTTCTACCTCCGCGGCAAGATCGAGCAACGTAGGCCG  
 CCCATGGACTTCATCAACGAGGTTGACATTATGAGCTTCGATCCAGTCAAATTGATCGAG  
 AAATACAAGGGTTACGGAGAGAATAGATGGTACTTCTTCACAGTGAGGAAACCATCGAAG  
 ACGAAGAAAAAGGACGAGCCAAATAGGAAGGTGGTGGTGGATGGGGTAGAGGAGGGAAGC  
 TGGAGCGCGACGGGGAGCGTGGCATATATCTGTGGGAAGGATCACGAGACTGTCATTGGC  
 ACCAAGAGGGTTCTCACCTACAAATCAGCTCGCTCTGCTGAGGAGGACAAGTGGAGCATG  
 CATGAGTATGTCATGTTAGATAAAATCCCAGATCCTGGATACAACCTAGGGATACAATGTCG  
 ATGGATCAATATGTTCTGTGTGCGATACAGTTGAAGCAGACATACGAGGCTGAAAAGAAG  
 GCCCAGGAGGAGGAGAGAGGCGTCAAACGCAAGAGAACGGCAACGAGGAAGAGGAGA  
 AAAGGAGACATTGATCAAACACTTCCCAGGAGCAAGAAGATCAGCAGCAGGAGACACCA  
 CCACCTGGAGATCCTCATGATCAATCCGTTGTAGATGCCCCCTATTATTCCACGCAAATG  
 GCGTTAGGAGGAGAAGAAGAAGTTGCGCCAGTTCCATGGTGGCGCGATTGCATGGCGCAA  
 CCTGATCGAATCGAATATCCTGCAGTGTGGTACAATCAGCAGGAGCAACAGCCATCGCAG  
 TTAGTTGATCGATCGATGATGACACAAGGCTACATTGGAGATCTTTCTTACATTGAGAAT  
 CAATTTGATCAACAGCAGGCACATGATCATGGTAGCATTAAATGCATTTGACGAGGCTCTC  
 GACCAATGCCATGACACCAATTTTCGCATGGGATAATGCTGGTATCTATCCTGGAAATAAC  
 TTGCTAGATGGCAACTTGATGATGATACTCAGGATCAGTTTGGCAATCAATCTACTCTT  
 GGTGCATTAACCTGGAGAATTAGAGTATGGCACGGGCTACCAGTTCCATGACGCACTCCAG  
 GCTACGCCAGGTTCTGATGATGCATCTGCTCAATCCATGGGAATTCAACCTGCTGCTGGA  
 CATTCCATGGGAGATGATGATGAGACATGCTGTAATGATGATTTGTCGTCACCTCTTGCT  
 GATATTTTCGAGAATCTTACTAGATGGCAATGGTGTATAAAACAATGAAGGAAACCCAGAG  
 GGAAGTAATCAGGGCTTGACATCTGCAAAGATGGACACCAATGGCCGTTAGAAGAGAGC  
 ACAATGCCAACGGTTGAGTGTGTTCTGCAGCATCCTGGAGAGTCTGCCTGA

## Protein

> **ONAC111**

MTAESNGGNSSAAATTASNGGRRRHVLPKLRLLPPGYHFPVSDEELVDFYLRGKIEQRRP  
PMDFINEVDIMSFPVKLIEKYKGYENRWYFFTVRKPSKTKKKDEPNRKVVVDGVEEGS  
WSATGSVAYICGKDHE TVIGTKRVLTYKSARSAEEDKWSMHEYVMLDKSQILD TTRDTMS  
MDQYVLCALQLKQTYEAEKKAQEEEEERGVKRKRTATRKRRKGDIDQTTSQEQEDQQQETP  
PPGDPHDQSVVDAPYYSTQMALGGEEVAPVPWCADCAQPDRIEYPAVWYNQQEQQPSQ  
LVDRSMMTQGYIGDLSYIQNQFDQQQAHDHGSINAFDEALDQCHDTNFAWDNAGIYPGNN  
LLDGNLDDDTQDQFGNQSTLGALTGELEYGTGYQFHDALQATPGSDDASAQSMGIQPAAG  
HSMGDDDETCCNDLSSLLADISRILLDGNNGVINNEGNPEGSNQLHICKDGHQWPLEES  
TMPTVECVLQHPGESA\*

**Gene Structure**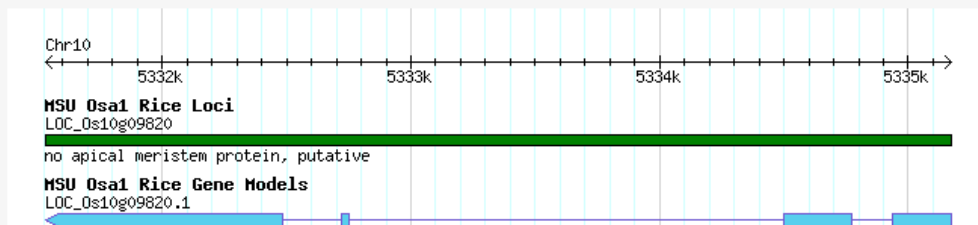**LOC\_Os10g25620 (ONAC112) sequence information**

**Genomic sequence length:** 2159 nucleotides

**CDS length:** 1599 nucleotides

**Protein length:** 532 amino acids

**Putative Function:** no apical meristem protein, expressed

## Genomic Sequence

> **ONAC112**

ATGGCAGAACTACCAACCGGAAGGCCGCGCGCGGTGGCAACAACAATGGGAAGTGAAG  
GGGAAGGAAAAGGTGGTGCCCGAGTACGGCAAGAACCGGCACGGCATGTCCGTCGGCTGG  
TACTTCGTCCCCAAGGATCTGGAGCTCTTTGCCATCCTCAAGTGCAAGCTCGTCCGCGGC  
CAGCTCCCCGGCGCCCTCAACAACGTCTTCGAGCATATCAGGATCCTCGAATTCCACCCC  
GCCCTCCTGCATGGTATGCCTGCTTCACCGCCGCCATCTACCTCTCTTTCTATCCCC  
TTCATCAATAACCGTCCTCTTCTTCTTCTTCTTCTTCTGCGGACGACGTATGTAG  
AGATGTACATCAAGAACGAGGAGGATGGGTACATCTACTTCTCAGCAAGAGGCAGTTCA  
CGACGAAGGCAGGGAACAAGAGGCGCGCCGACGCGGGTGACAAAGGGCGGGACGTGGAAGG  
CGTCTGGCGGGAGCAAGACAGTGAGGAGCAAGAAGTTCGGCGGCATCGACGTTGGCCAGA  
AGCTCACCATGGTGTCTACGAGCGCAGGTTTGAGGGTGACCGGAACCCCATCAAGACCA  
ATTGGGCGCATGCATGAGTTCACCAAGATCATTGATGGCACCAAAAACCAGGTAGTCCTTG  
TTTTGATTTACTTCAAATTTAAATTTAAATCAATCTGCATTACATTACAATCTACTCCCT  
CCATATTATAAGTCATTTTGAACCTTTTTTAAAGTTGAACCTCTCCAAGTTTAACCAAATTT  
ATATAAAAAAATTAACATCTACAATATAAAAAATTAGTTTCATTAAATGTAAACATTAGA  
TATATATTTTGATAATATGTTTGTGTTTATGTTAAATTTATTGTTATATTTTGGTTAAACT

TAAAAAGTTTTACTTAAAAAAGTCTAAATCGACTTGTATATAATATAAAACAGAGCGAGT  
 ATATTTAAACATTATGTTTTGTTTCGTCTTGTAAATTAAGTATTGATGCTCAAGTGGATTG  
 ATAGATTTTTTGTGTTTGAATTTGAATTTTGGATGCAATTTGTGCTAATTTGGGCTGAT  
 CAATTTCTGTGGATTTTGCCAAGCTTGAGGACCTTGCCGTGTACCGCCTGTACAAGATCA  
 AAAGGAAGGAGGACGAAGAACCGTCGAACACTGCCGCCGCGGCGTCGAGCACCGACGAGC  
 CCTCCACGTCGTCGGCATTGCCACCTCCTACGCCACCGCGGCCATTGCCGGACATGGCCG  
 GACCGTCGTCAGCAACGCCGCTACTGCCACTGCAATTGCCGGGCCTGGCCGGGTGCTCGT  
 CTGCGATGTGCTGCTGCACTGCAGCTGCCGGGCATGGCCGGGTGCTCGTCTGGCGATGC  
 CGCTACCGCCACTATCGTTGCCGGGCCTGGCTGGAGGGATGATGTCCATGGCGGACCAGG  
 CGAACATGGCCTCGACGTCGCAGGCGTCCACACCGTCGTCGGAGCTCCTGCAAGACTGGT  
 ACGACGAGTTCGAGATCACGTACGGCGCCGTGGCTCCGCCGTCTCCTAGCACGATCAGCT  
 GGGTGGCGCCGAGAGCTCGCCGACGGGTGGTGGCCGTGCGCCGAACGGCGGGCCGGTGC  
 AGCACGACGGCTACCTCGGGATGGCAGCGGATCCAACGTCGTACATGCTGGAAAACCTGT  
 TGCCACCGCGGCGATCCCGCCGAGCCGATGATGCCGCCGACGAGCTCGCCGGCGCCAC  
 CACCAGCCGTCGACCACCACCACCGGCTCTCGCCTCCGCATGACGCCGCCGGCAGCAACT  
 ACAACCACCCGAGCTCGCCGACTACAACGGCGGCGTCCAGGCGCAGCACGAGCATCAGT  
 ATCACCACAGGAGCCGAGGCATCGCTGGTGGATGCCGAGGACGGCTACAGCGCCATGG  
 CCGGTGGCGACGACGCGCAGCTGGGCGGCGGAGCTTGACACCGAACGAATCGCCGAAA  
 TGGTAAACCATATAATGGATGGCGAATTCGAGTTCAAATTCGAGGACAACACCGTCTTA  
 AGTACAACGAAGTCTTTCTGACAATGATGAGGTGGTGGCGGCGCCGATGATGATCGACG  
 GTGGTAGGGATGGCGATGGCGCAGATGGAGGTGATGGAGACGACCCATTCGACAATTAG

CDS

> **ONAC112**

ATGGCAGAACTACCACCGGAAGGCCGCGGCGGGTGGCAACAACAATGGGAAGTGAAG  
 GGAAGGAAAAAGGTGGTGCCCGAGTACGGCAAGAACCGGCACGGCATGTCCGTGCGGTGG  
 TACTTCGTCCCCAAGGATCTGGAGCTCTTTGCCATCCTCAAGTGCAAGCTCGTCCGCGGC  
 CAGTCCCCGGCGCCCTCAACAACGTCTTCGAGCATATCAGGATCCTCGAATTCCACCCC  
 GCCCTCCTGCATGAGATGTACATCAAGAACGAGGAGGATGGGTACATCTACTTCTTCAGC  
 AAGAGGCAGTTACGACGAAGGCAGGGAACAAGAGGCGGCCGACGCGGGTGACAAAGGGC  
 GGGACGTGGAAGGCGTCTGGCGGGAGCAAGACAGTGAGGAGCAAGAAGGTGCGCGGCATC  
 GACGTTGGCCAGAAGCTCACCATGGTGTCTACGAGCGCAGGTTTGAGGGTGACCGGAAC  
 CCCATCAAGACCAATTGGGGCATGCATGAGTTCACCAAGATCATTGATGGCACCAAAAAC  
 CAGCTTGAGGACCTTGCCGTGTACCGCCTGTACAAGATCAAAGGAAGGAGGACGAAGAA  
 CCGTCGAACACTGCCGCCGCGGCGTCGAGCACCGACGAGCCCTCCACGTCGTGCGCATTG  
 CCACCTCCTACGCCACCGCGGCCATTGCCGGACATGGCCGGACCGTCGTCAGCAACGCCG  
 CTACTGCCACTGCAATTGCCGGGCCTGGCCGGGTGCTCGTCTGCGATGTGCTGCCTGCA  
 CTGCAGCTGCCGGGCATGGCCGGGTGCTCGTCTGGCGATGCCGCTACCGCCACTATCGTTG  
 CCGGGCCTGGCTGGAGGGATGATGTCCATGGCGGACCAGGCGAACATGGCCTCGACGTCG  
 CAGGCGTCCACACCGTCGTCGGAGCTCCTGCAAGACTGGTACGACGAGTTCGAGATCACG  
 TACGGCGCCGTGGCTCCGCCGTCTCCTAGCACGATCAGCTGGGTGGCGCCGACAGCTCG  
 CCGACGGGGTGGTGGCCGTCGCCGAACGGCGGGCCGGTGCAGCACGACGGCTACCTCGGG  
 ATGGCAGCGGATCCAACGTCGTACATGCTGGAAAACCTGTTGCCACCGCGGCGATCCCG  
 CCGGAGCCGATGATGCCGCCGACGAGCTCGCCGGCGCCACCACCAGCCGTCGACCACCAC  
 CACCGGCTCTCGCCTCCGCATGACGCCGCCGGCAGCAACTACAACCACCCGAGCTCGCC

GACTACAACGGCGGCGTCCAGGCGCAGCACGAGCATCAGTATCACCCACAGGAGCCGCAG  
GCATCGCTGGTGGATGCCGAGGACGGCTACAGCGCCATGGCCGGTGGCGACGACGCGCAG  
CTGGGCGGCGCGGAGCTTGACACCGAACGAATCGCCGAAATGGTAAACCATATAATGGAT  
GGCGAATTCGAGTTCAAATTCGAGGACAACACCGTCCTTAAGTACAACGAAGTCTTTCCT  
GACAATGATGAGGTGGTGGCGGCGCCGATGATGATCGACGGTGGTAGGGATGGCGATGGC  
GCAGATGGAGGTGATGGAGACGACCCATTCGACAATTAG

Protein

> **ONAC112**

MAELPPEGRGGGGNNNGKWKGEKVVPEYGKNRHGMSVGWYFVPKDLELFAILKCKLVRG  
QLPGALNNVFEHIRILEFHPALLHEMYIKNEEDGYIYFFSKRQFTTKAGNKRPRTRVTKG  
GTWKASGSKTVRSKKVGGIDVGQKLTVMFYERRFEGDRNP IKTNWGMHEFTKI IDGTKN  
QLEDLAVYRLYKIKRKEDEEPSNTAAAAASSTDEPSTSSALPPPTPPRPLPDMAGPSSATP  
LLPLQLPGLAGSSSAMSPLPALQLPGMAGSSSAMPLPPLSLPGLAGGMMSMADQANMASTS  
QASTPSSELLQDWYDEFEITYGAVAPPSPSTISWVAPQSSPTGWWPSPNGGPVQHDGYLG  
MAADPTSYMLENLLPTAAIPPEPMMPTSSPAPPPAVDHHHRLSPPHDAAGSNYNHPELA  
DYNGGVQAQHEHQYHPQEPQASLVDAEDGYSAMAGGDDAQLGGAELDTERIAEMVNHIMD  
GEFEFKFEDNTVLKYNEVFDPNDEVVAAPMMIDGGRDGDGADGGDGDGDPFDN\*

Gene Structure

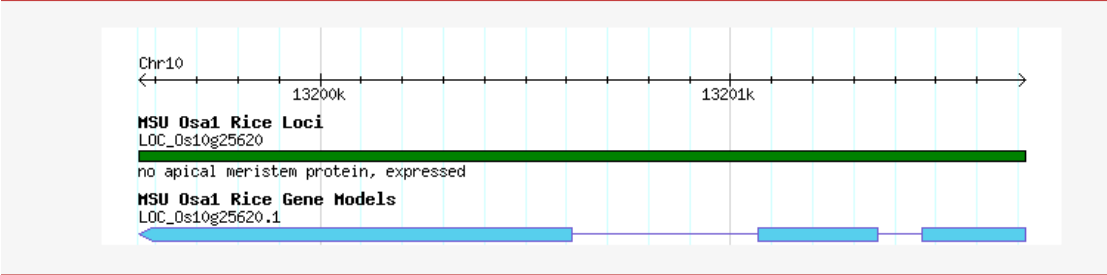

**LOC\_Os10g25630 (ONAC113) sequence information**

**Genomic sequence length:** 1143 nucleotides

**CDS length:** 780 nucleotides

**Protein length:** 259 amino acids

**Putative Function:** no apical meristem protein, putative, expressed

Genomic Sequence

> **ONAC113**

ATGGAGGCAGTATTCATGTTCAAGCGGATTGATCGAATTCATTCTTTGAATTTGAATTT  
CGGATGCAATTTGTGCTAATTTGGCTTGATAACTTAATTATGTGGATTTTGGCCAAGCTT  
GAGGACCTTGCCGTGTACCGCGTGTACAAGATCAGAAGGAAGGAGGACACAGAGCCGGTG  
AACGCCGCCGCCGCGGTGTCGAGCACGGACGAGCCCTCCACGCCGGCGGCACTGCCACTG  
CCTACGCCACCGCCACGGCCATTGCCGACATGGCCGGATCGTCATCGGCAACGTCGCTA  
CTGCCACTGCAATTTCCAGGCTTGGCTGGGTCGTCGTCGACGATGCCGCTGGCACTGCCA  
CTGCAGCTGCCTGGCTGCCAGGTCGTCGTCGGTGATGTCGCTGCCGGGCTTGGCTGGA

GAGATGACGTCCATGGGCCATGGCGAAACAGGCGAACATGGCCTCGACGTCACAGGCATC  
AACACCGTCGTCGGAGCTCCCACAAGACTGGTACGACGAGTACGAGGTTCGCGTACGGTGC  
CGTGGCGCCGCCGGCTCCTAGCACGATCAGCTGGGCGGCGCTGCCGAGCTCGCCGACGGC  
GTGGTGGCCGCCATCGAACGGCGGGCCGATGCAGCACGACGGCTACCTCGGGATGGCGGA  
TCCTGCGTCGTACACGTTGGAACACCTGTTGCCCACCGCGGCGATCCCGCCAAAGCCGAT  
GGCGCCGCCGAAGAGCTCGCCGGCGCCACCACCAGCCGTCGGCCACCACCGGCTCTCGCC  
TCCGCATGACGCCGCCGGCAACTACGACCACCTGGAGCTCGCCAACTACGGCGGCGTCCG  
GCGCAGCACGAGCATCATCATCATCCACAGGAGCTTACGGATGGCACGGACGGCGAC  
GGTGCCATGGCCGACGGCGACACACAGCTAGACGCCGCCGCCGCCGCCGCGGAGTTTGAT  
TCCGAACGAGTAGCCGAAATAGTATCCCAAATAATGGACGGTGAATTCGAGTTTAAATTC  
GACGACGACACCATTGTTAGCTTCAACGAGGTGGTGGCGGCGCCGATGTTGATCGACGGC  
GATGGGGACGGCGACGGCGATGGTGCAGATGGAGGTGTTGGAGATGATCCATTCGAGAAT  
TAG

CDS

> **ONAC113**

ATGGAGGCAGTATTTCATGTTCAAGCGGATTGATCGAATTCCATTCTTTGAATTTGAATTT  
CGGATGCAATTTGTGCTAATTTGGCTTGATAACTTAATTATGTGGATTTTGGCCAAGCTT  
GAGGACCTTGCCGTGTACCGCGTGTACAAGATCAGAAGGAAGGAGGACACAGAGCCGGTG  
AACGCCGCCGCCCGGGTGTGAGCACGGACGAGCCCTCCACGCCGGCGGCACTGCCACTG  
CCTACGCCACCGCCACGGCCATTGCCGGACATGGCCGGATCGTCATCGGCAACGTCGCTA  
CTGCCACTGCAATTTCCAGGCTTGGCTGGGTCGTCGTCGACGATGCCGCTGGCACTGCCA  
CTGCAGCTGCCTGGCTGCCAGGTCGTCGTCGGTGATGTCGCTGCCGGGCTTGGCTGGA  
GAGATGACGTCCATGGGCCATGGCGAAACAGGCGAACATGGCCTCGACGTCACAGGCATC  
AACACCGTCGTCGGAGCTCCCACAAGACTGGAGCTTACGGATGGCACGGACGGCGACGGT  
GCCATGGCCGACGGCGACACACAGCTAGACGCCGCCGCCGCCGCCGCGGAGTTTGATTCC  
GAACGAGTAGCCGAAATAGTATCCCAAATAATGGACGGTGAATTCGAGTTTAAATTCGAC  
GACGACACCATTGTTAGCTTCAACGAGGTGGTGGCGGCGCCGATGTTGATCGACGGCGAT  
GGGGACGGCGACGGCGATGGTGCAGATGGAGGTGTTGGAGATGATCCATTCGAGAATTAG

Protein

> **ONAC113**

MEAVFMFKRIDRIPFFEFEFMRMQFVLIWLDNLIWILAKLEDLAVYRVYKIRRKEDTEPV  
NAAAAVSSTDEPSTPAALPLPTPPRPLPDMAGSSSATSLPLQFPGLAGSSSTMPLALP  
LQLPGLPRSSSVMSLPGLAGEMTSMGHGETGEHGLDVTGINTVVGAPTRLELTDGTDGDG  
AMADGDTQLDAAAAAAEFDSERVAEIVSQIMDGEFEFKFDDDTIVSFNEVVAAPMLIDGD  
GDGDGDGADGGVGDDPFEN\*



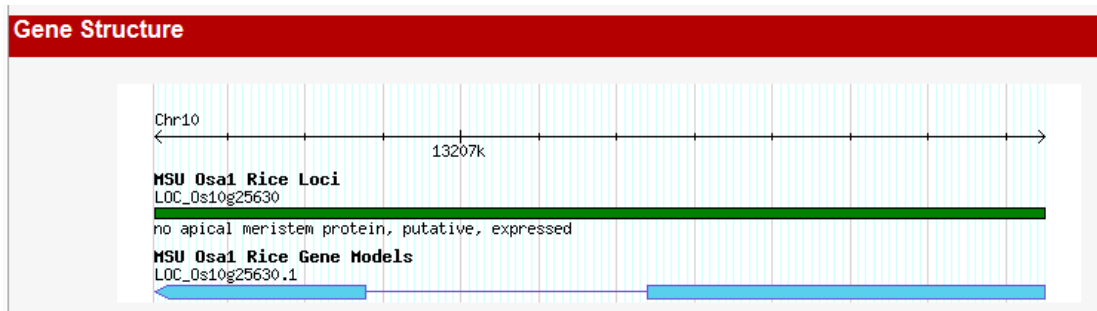

### LOC\_Os10g25640 (ONAC114) sequence information

**Genomic sequence length:** 1369 nucleotides

**CDS length:** 588 nucleotides

**Protein length:** 195 amino acids

**Putative Function:** no apical meristem protein, putative

Genomic Sequence

#### > ONAC114

```

ATGGAGGGAGTAGATCGTATTGGCTGGAACCTGGGCTTGGGCTTCCTTAGGAAAGGTTGG
AAATAAACACACATGGTCAAAACGATCGTTTCCATTATCGTACGTATTGGCTGCTACACT
CCTGAACAGACTCAGAGACGGAGCAACGGCTACCGTTGAAACAGACCCGGAACAACGTA
CGAAGACCCCTACAAGGAATTTTGTAACTAGCTACTAATGGTAAGCAGTAAAAAAAC
AATCAAAAACGGCTTAGAGTCGGCCGACGGACAACAAAACAACTGAACTAGGACAAG
GGCATATTCTACTCTACTCCCTTCAATTTCCCCCAAATTGAATTCGAATCAAACGAC
CGCCTCACTCCCACAAAAAAAAGACATCTCATGCCACCCCAAAAATACACAGCCCTCAC
CACGCCACGCGAGCACCAGCGACCGATCATGACTCAGCTAACTCTATCTCTCTCTCT
CAACCTAACTAATCCTCTCTCTATCCCTCTCCCGATTGACTACAACCTCCGACCACTAGT
TATCATTAGCCATGGGCAGAACGGCCCGCGGTGCATGGGGACAGCGGCGCAGCGGTGGA
AGCAACAGCAACGATGGGAAGTGGAAGGGGAAGGAGAAGGTGGTGCCGGAGTACGGCAAG
AACCGGCACGGCATGCCTGTCTGGCTTCTACTTCGTCCCAAGGACCTGGAGCTCCTCGCC
ATCCTCATGTGCAAGCTCGTCCGAGGCAAGGTCCCCGGCGCCCTCAACAACGTCTTCAAG
CATATCAGGATATTGAATTCCACCCCGCCCTCCTCCATGGTACGCCCCTTCGCTGCCAC
CTTCTCTCTACTTTTCTCTTGTGTTTCCCTTCATCATCAATATTTTAAATAGTGAGCTAA
GACATTTAGCGGTTGGGTTTCTTAAATAACTATATCTATAGTGGGTAAATGGAGCTATT
ATAGTTAAATTGTATATGAAAGCAAATAGTTGGACCCTTCTTAAACATTTATAACTGAAG
AATAGCAACAGCTATAGCTGAGGATTTAAAACCATGTTTCATCAACATCTTCTTCTTGGC
AATGGCGTGTGCAGAGACGTATATCGAGACTATGGAGGACGGGTACATCTATTTCTTTAG
CAAGAGGCAATTCGCAACGAAGGCTAGGAACAAGAGGCGGCCGATGAGGGTGGCAGACGG
CGGGACGTGGAAGGCGTCCGGTGGGAGCAAGAAGGTCCGTGGCATCGATGTCAGTCAGAA
GTTACCATGGTGTCTACGAGCGTAGGTTTGAGGGCGACCGAAATCCCGTCAAGACCAA
CTGGGGCATGCACGAGTTCACCAAGATCATTCCTGGCACCAAAAACCTAG

```

CDS

#### > ONAC114

ATGGAGGGAGTAGATCGTATTGGCTGGAACCTGGGCTTGGGCTTCCTTAGGAAAGAACGG  
 CCCCCGGTGCATGGGGACAGCGGCGGCAGCGGTGGAAGCAACAGCAACGATGGGAAGTGG  
 AAGGGGAAGGAGAAGGTGGTGCCGAGTACGGCAAGAACCGGCACGGCATGCCTGTCGGC  
 TTCTACTTCGTCCCCAAGGACCTGGAGCTCCTCGCCATCCTCATGTGCAAGCTCGTCCGA  
 GGCAAGGTCCCCGGCGCCCTCAACAACGTCTTCAAGCATATCAGGATATTGAATTCCACC  
 CCGCCCTCCTCCATGACGTATATCGAGACTATGGAGGACGGGTACATCTATTTCTTTAGC  
 AAGAGGCAATTTCGAACGAAGGCTAGGAACAAGAGGCGGCCGATGAGGGTGGCAGACGGC  
 GGGACGTGGAAGGCGTCCGGTGGGAGCAAGAAGGTCCGTGGCATCGATGTCAGTCAGAAG  
 TTCACCATGGTGTCTACGAGCGTAGGTTTGAGGGCGACCGAAATCCCGTCAAGACCAAC  
 TGGGGCATGCACGAGTTCACCAAGATCATTCCTGGCACCACCAAACTAG

#### Protein

#### > ONAC114

MEGVDRIGWNLGLGFLRKERPPVHGDSGGSGGSNSNDGKWKGKEKVVPPEYGKNRHGMPVG  
 FYFVPKDLELLAILMCKLVRGKVPALNNVFKHIRILNSTPPSSMTYIETMEDGYIYFFS  
 KRQFATKARNKRRPMRVADGGTWKASGSGSKVGGIDVSQKFTMVFYERRFEGDRNPVKTN  
 WGMHEFTKIIPGTKN\*

#### Gene Structure

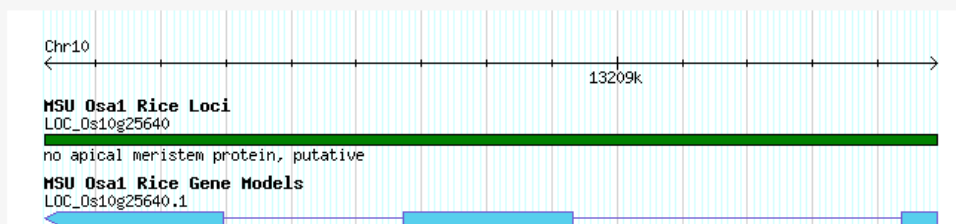

#### LOC\_Os10g26240 (ONAC115) sequence information

**Genomic sequence length:** 623 nucleotides

**CDS length:** 519 nucleotides

**Protein length:** 172 amino acids

**Putative Function:** no apical meristem protein, putative

#### Genomic Sequence

#### > ONAC115

ATGGGAAGTGGAAGGGGAAGGAGAAGGTGGTGCCCAAGCACGGCAAGAACCGGCACGGCA  
 TGCTTGTCGGCTGCTACTTCGTCCCCAAGGACCCTGGAGCTCTTCGCCATCCTCAGGTGC  
 AAGCTCGTATGCGGCCAGCTCCCCGGTGCCCTCAACAACGTCTTCGAGCATATCAGGATC  
 CTCGAATTCCACCCCGCCCTCCTCCATGGTATGCCCCGTTCCGCCCCCCCTCTCTACCTC  
 TCTCTTTCTGTCCCCTTCATCAATACCCGTCCTCCTCCTCTTCTTCTTCTCCGGTGA  
 TGACATGTGTAGAGACGTACATCGGGAAAGAGGAGGATGGGTACATCTACTTCTTCAACA  
 GGTGGCAGTTCGCGACGAAGGCAGGGAACAAGAGGCGGCCGACACAGGTGGCGAAGGGCG  
 GGACGTGGAAGGCGTCTAGTGGGAGCAAGACGGTGAGGAGCAAGAAGGTCGGCGGCATCG  
 ACATCGGCCAGAAGCTCACCATGATGTTCTACGAGCGCAGGTTTCGAGGGTGACCGGAACC

CCATCAAGACCAATTGGGGCATGCACGAGTTCACCAAGATCATTGATGACTCCAAAAACC  
AAAAACCAGGTAGTCCTTGTTAA

CDS

> **ONAC115**

ATGGGAAGTGAAGGGGAAGGAGAAGGTGGTGCCCAAGCACGGCAAGAACCGGCACGGCA  
TGCTTGTGCGCTGCTACTTCGTCCCCAAGGACCCTGGAGCTCTCGCCATCCTCAGGTGC  
AAGCTCGTATGCGGCCAGCTCCCCGGTGCCCTCAACAACGTCTTCGAGCATATCAGGATC  
CTCGAATTCCACCCCGCCCTCCTCCATGAGACGTACATCGGGAAAGAGGAGGATGGGTAC  
ATCTACTTCTTCAACAGGTGGCAGTTCGCGACGAAGGCAGGGAACAAGAGGCGGCCGACA  
CAGGTGGCGAAGGGCGGGACGTGGAAGGCGTCTAGTGGGAGCAAGACGGTGAGGAGCAAG  
AAGGTCGGCGGCATCGACATCGGCCAGAAGCTCACCATGATGTTCTACGAGCGCAGGTTC  
GAGGGTGACCGGAACCCCATCAAGACCAATTGGGGCATGCACGAGTTCACCAAGATCATT  
GATGACTCCAAAAACAAAAACCAGGTAGTCCTTGTTAA

Protein

> **ONAC115**

MGSGRGRRRWCPSTARTGTACLSAATSSPRTLELFAILRCKLVCGQLPGALNNVFEHIRI  
LEFHPALLHETYIGKEEDGYIYFFNRWQFATKAGNKRRTQVAKGGTWKASSGSKTVRSK  
KVGIDIGQKLTMFYERRFEGDRNPIKTNWGMHEFTKIIDDSKNQKPGSPC\*

**Gene Structure**

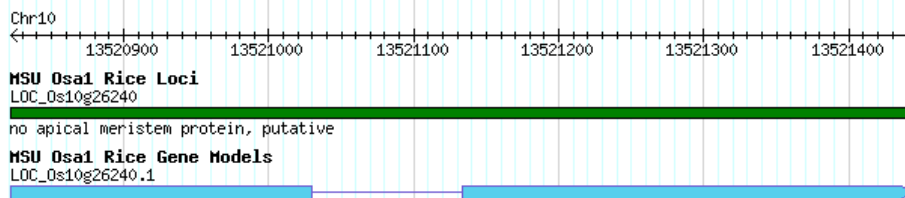

**LOC\_Os10g26250 (ONAC116) sequence information**

**Genomic sequence length:** 815 nucleotides

**CDS length:** 549 nucleotides

**Protein length:** 182 amino acids

**Putative Function:** no apical meristem protein, putative

Genomic Sequence

> **ONAC116**

ATGGCGGACCAGGCGAACATGGCCTCGACGTCGCAGGCGTCCACACCGTCGTCGGAGCTC  
CTGCAAGACTGGTACGACGAGTTCGAGATCACGTACGGCGCCGTGACGCCGCCGTCTCCT  
AGCACGATCAGCTGGGAGGCGCCGAGAGCTCGCCGATGGGGTGGTGGCCGTCACCGAAC  
GGCGGGCTGGTGAGCACGACGGCTACCTCAGGATGGCGGCGGATCCAACGTGGTACATG  
CTAGAACACCTGTTGCCACCGCGGCGATCCCGCCGAACCGATGACGCCGAAGAAGAGC

TCGCCGGCGCCACCACCAGCCGTCGACCACCACCACCGGCTCTCGCCTCCGCATGACGCC  
 GCCGGCTACAACGGCGGCATCCAGGCGCAGCACGAGAATCAGCATCATCCGCAGGAGCCG  
 CAGCCGGCATTGCTGGTGGATGGCGAGGACGGCTACGGCGCCATGGCCGACAGCAACGAC  
 ACACAGCTGGGCGGCACGGAGTTTGACACCGAACGAATCGCCGAAATGGTAAAAGTTCAA  
 ATTCGAGGATAACACCGTCCCTTAAGTACAACGAAGTCTTTCCTGACGACGACGAGGTGGT  
 GCGGCGCCGATGATGATCGACAGCGGTGCGATGGTGCAGAGGGATGTGATGGAGACGAC  
 CCATTTCGACAATTAGGGCCCTCGTTCGAAAACCGCTGGAATTTCAAGTTTCCCTGGCTAT  
 AAATTCTTTGCTTCAAAATTTACTCGATTTTGTAAGTTAATGTTTCATATTTACTATTTG  
 CTCCATGTTTTTAGTTTCGTATAGACCTTTGGTAA

CDS

> **ONAC116**

ATGGCGGACCAGGCGAACATGGCCTCGACGTCGCAGGCGTCCACACCGTCGTCGGAGCTC  
 CTGCAAGACTGGTACGACGAGTTCGAGATCACGTACGGCGCCGTGACGCCGCCGTCTCCT  
 AGCACGATCAGCTGGGAGGCGCCGACAGAGCTCGCCGATGGGGTGGTGGCCGTCACCGAAC  
 GCGGGGCTGGTGCAGCACGACGGCTACCTCAGGATGGCGGCGGATCCAACGTGGTACATG  
 CTAGAACACCTGTTGCCACCGCGGCGATCCCGCCGAACCGATGACGCCGAAGAAGAGC  
 TCGCCGGCGCCACCACCAGCCGTCGACCACCACCACCGGCTCTCGCCTCCGCATGACGCC  
 GCCGGCTACAACGGCGGCATCCAGGCGCAGCACGAGAATCAGCATCATCCGCAGGAGCCG  
 CAGCCGGCATTGCTGGTGGATGGCGAGGACGGCTACGGCGCCATGGCCGACAGCAACGAC  
 ACACAGCTGGGCGGCACGGAGTTTGACACCGAACGAATCGCCGAAATGTTTCGTATAGAC  
 CTTTGGTAA

Protein

> **ONAC116**

MADQANMASTSQASTPSELLQDWYDEFEITYGAVTPPSPSTISWEAPQSSPMGWWPSPN  
 GGLVQHDGYLRMAADPTWYMLEHLLPTAAIPPEPMTPKKSSPAPPPAVDHHRLSPPHDA  
 AGYNGGIQAQHENQHHPQEPQPALLVDGEDGYGAMADSNDTQLGGTEFDTERIAEMFRID  
 LW\*

**Gene Structure**

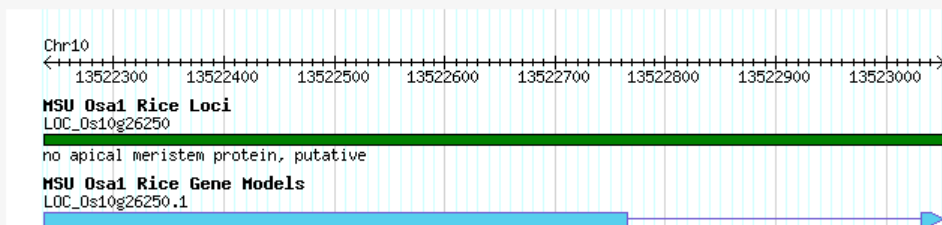

**LOC\_Os10g26270 (ONAC117) sequence information**

**Genomic sequence length:** 1980 nucleotides

**CDS length:** 1245 nucleotides

**Protein length:** 414 amino acids

**Putative Function:** no apical meristem protein

## Genomic Sequence

> **ONAC117**

ATGGCGTGTGCAGAGACGTATATCGAGAACATGGAGGACAGATGCATCTACTTCTTTAGC  
 AGGAGGCTATTTCGAGCGAAGGCTAGGAACAAGAGGCAGCCGATGAGGGTGGCAAACGGT  
 GGGACGTGGAAGGCATCTGGTGGGAGCAAGACGGTGAGGAGCAAGAAGGTTGGCGGCATC  
 GATGTTGGTCAGAAGCTCACCATGGTGTCTACGAGCGTAGGTTTCGAGGGCGACCAAAAC  
 CCTGTCAAGACCAACTGGGCCATGCACGAGTACACCAAGATCATTCCCTAGCTCCAAAAAC  
 CAGGTAGTACTTGGTAATTTATATTTAAATTCAAATCAGTCCGCAAATACATTACATTAC  
 GATCTATATCTAAATAGGGTGTAGCTATATTTATGGCGTCATACTTTTTATAAAAAAATA  
 GTCGGCATGTATTTATATTGTAAGTTCATAAATTACATATGTAATTTTAGTGTATTTACA  
 ATGTAAGTCTCAAAATTACATATGTAAGTACTAAAAATTACATATGTAAATTCGAAAATTA  
 CATACTAATTGCATATGTAAGTGGGGTGTAATGAGGTGTAAGTACTGTGTAAGTGGCTG  
 AAAAAAATCGACTATATTTCTAGCAACTCCGTCTAAATATTGTGTTTTGTCTTGTAATTA  
 ACATTCCATTATACGGCCTCCATTACATATTATAAGTCGATTTGACTTTTTCATAGTTAA  
 ACTTCAAGTTTATAGACAAATATAATAACATCTAAAACATCAAAGTTCATTAAATC  
 TAACATTAAATATATTTTGATAATATATATATTTTTGAAATACTACCATATTTTTTCTAT  
 AAATTTATTTAGTCAAACATTAAACTGAAAAAGTTTAAATTAGAAAAAATTAAATGA  
 CTTATAATATAAAACGTATAAAATGGAGGGAGTATTCATGATCAAGCGGATTGATCGAAT  
 TCAATTTGTGCTAATTTGGCTTGATAAATTAATTTTGTGGATTTTGGACAAGCTTGAGGA  
 CCTTGCCGTGTACCGCCTGTACAAGATCAGAAGGAAGGAGGACACAGAGCCGGTGAACGC  
 TGCCGCCGCGGCGTCGAGCACGGACAAGCCCTCCACGCCGGAGGCACTGCCACCGCCTAC  
 GCCACCGCCACGGCCATTGCTGAACATGGCCGGATCATCGTCGGCAACGTCGCTACTGCC  
 ACCGCAATTGCCAGGCCTGGCTGGGTTCGTCGTCGACGATGCCGCTGGCACTGCCACTGCA  
 GCTGCCTGGCCTGCCCGGGTCGTCGGCGGCGATGTCGCTCTGCCGGGCTTGGCTGGAGAG  
 ATGACGTCCATGGCGGACCAGGCGAACATGGCCCTCGACGTCACAGGCGTCAGCACCGTCG  
 TCGGAGCTCCCGCAGGACTGGTACGACGAGTACGAGGTTCGCGTACGGTGCCGCGGCGCCG  
 CCGTCTCCTAGCACGATCAGCTGCGCGGCGCTGCCGAGCTCGCCGACGGCGTGGTGGCCG  
 TCATCGATCGGCGGGCCGGTGCAGCACGACGGCTACCTCGGGATGGCGGATCCTGCGTCG  
 TGTAATACGTTGGAACACCTGTTGCCAGCGCGGCGATCCCACCAGAGCCAATGGCGCCG  
 CCGAAGAAGTCCGCCGGCGGCGCCACCACCGGCCGACGCCGGCGGCAACTACGACCACCCG  
 GAGCTCGCCGACTACGGCGGCGGCGTCCAGGCGCAGCACGAGCATCATCAGCCGCAGGAG  
 CTGACGGATGGCGCGGACGGCGACGCACAGCTAGAGCTAGGCGCCGCGGAGTTTGATTCC  
 GAACGAGTAGCCGAAATGATATCCCAAATAATGGATGGTGAATTCGTGTTTAAATTTGAG  
 GACGACACCATTTGTTAGCTTCAACGAGGTGGCGGCGGCGCCGATGTTGATCGACGGCGGT  
 GGGGACGGCGACGGCGATGGTGCAGATGGAGGTGTCGGAGATGATCCATTGATAATTAG

## CDS

> **ONAC117**

ATGGCGTGTGCAGAGACGTATATCGAGAACATGGAGGACAGATGCATCTACTTCTTTAGC  
 AGGAGGCTATTTCGAGCGAAGGCTAGGAACAAGAGGCAGCCGATGAGGGTGGCAAACGGT  
 GGGACGTGGAAGGCATCTGGTGGGAGCAAGACGGTGAGGAGCAAGAAGGTTGGCGGCATC  
 GATGTTGGTCAGAAGCTCACCATGGTGTCTACGAGCGTAGGTTTCGAGGGCGACCAAAAC  
 CCTGTCAAGACCAACTGGGCCATGCACGAGTACACCAAGATCATTCCCTAGCTCCAAAAAC  
 CAGTGTATTTACAATAAGGAAGGAGGACACAGAGCCGGTGAACGCTGCCGCCGCGGCGTC

GAGCACGGACAAGCCCTCCACGCCGGAGGCACTGCCACCGCCTACGCCACCGCCACGGCC  
 ATTGCTGAACATGGCCGATCATCGTCGGCAACGTCGCTACTGCCACCGCAATTGCCAGG  
 CCTGGCTGGGTCGTCGTCGACGATGCCGCTGGCACTGCCACTGCAGCTGCCTGGCCTGCC  
 CGGGTCGTCGGCGGCGATGTCGCTCTGCCGGGCTTGGCTGGAGAGATGACGTCCATGGCG  
 GACCAGGCGAACATGGCCTCGACGTCACAGGCGTCAGCACCGTCGTCGGAGCTCCCGCAG  
 GACTGGTACGACGAGTACGAGGTCGCGTACGGTGCCGCGGCGCCGCGTCTCCTAGCACG  
 ATCAGCTGCGCGGCGCTGCCGAGCTCGCCGACGGCGTGGTGGCCGTCATCGATCGGCGGG  
 CCGGTGCAGCACGACGGCTACCTCGGGATGGCGGATCCTGCGTCGTGTAATACGTTGGAA  
 CACCTGTTGCCAGCGCGGCGATCCCACCAGAGCCAATGGCGCCGCCAAGAAGCTCGCCG  
 GCGGCGCCACCACCGGCCGACGCCGGCGGCAACTACGACCACCGGAGCTCGCCGACTAC  
 GGCGGCGGCGTCCAGGCGCAGCACGAGCATCATCAGCCGAGGAGCTGACGGATGGCGCG  
 GACGGCGACGCACAGCTAGAGCTAGGCGCCGCGGAGTTTGATTCCGAACGAGTAGCCGAA  
 ATGATATCCCAAATAATGGATGGTGAATTCGTGTTTAAATTTGAGGACGACACCATTGTT  
 AGCTTCAACGAGGTGGCGGCGGCGCCGATGTTGATCGACGGCGGTGGGGACGGCGACGGC  
 GATGGTGCAGATGGAGGTGTCGGAGATGATCCATTCGATAATTAG

Protein

> **ONAC117**

MACAETYIENMEDRCIYFFSRRLFAAKARNKRQPMRVANGGTWKASGGSKTVRSKVVGGI  
 DVGQKLTVMFYERRFEGDQNPVKTNWAMHEYTKIIPSSKNQCIYNKEGGHRAGERCRRGV  
 EHQALHAGGTATAYATATAIAEHGRIIVGNVATATAIARPGWVVDDAAGTATAAAWPA  
 RVVGGDVALPGLAGEMTSMDQANMASTSQASAPSELPQDWYDEYEVAYGAAAPPSPST  
 ISCAALPSSPTAWWPSSIGGPVQHDGYLGMADPASCNTLEHLLPSAAIPPEPMAPPKNP  
 AAPPPADAGGNYDHPELADYGGGVQAQHEHHQPQELTDGADGDAQLELGAAEFDSERVAE  
 MISQIMDGEFVFKFEDDTIVSFNEVAAAPMLIDGGGDGDGDADGGVGDDPFDN\*

Gene Structure

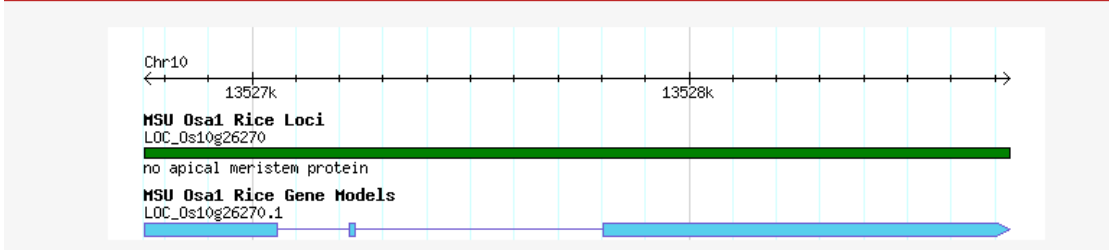

**LOC\_Os10g27360 (ONAC118) sequence information**

**Genomic sequence length:** 1978 nucleotides

**CDS length:** 1266 nucleotides

**Protein length:** 421 amino acids

**Putative Function:** no apical meristem protein, putative, expressed

Genomic Sequence

> **ONAC118**

GAGCACATAGCACGCGCGCACTCGTCTCGCCGCTCCACACCCATCGGCTCCAACACCGA

CGAGTAGCTCGGTCGCCGGGGCCGCCGCCGCGCGCGCGCCACCGTGTCGCGACTTCCT  
 CCGTGACCGGGCCGATCGATCGCGAGGCGCGGCGGCGAGGCCGGCATGGCGGCACCGG  
 GAGATGGGGAAGAGAAGAAGGCCGGGAGCGGGAGGAACAAGCACGGGTTCCCGCGCGGCT  
 TCCGCTTCGTGCCCCGGGACCAGGAGCTCCTCGACATCCTCGACGACAAGCTCCGCGGCG  
 CCCCCTCGACCGCGCGCTCGACGCCGTCTTCCACGACACGCGGATCCTCGACTTCCACC  
 CCGCCAAGCTCTACGGTAGCCACCGCCTCTCGATCCCTCTCCCCCTCTCTCTCTCTCT  
 CCTTCTTCTTCTTCTCCGGCGACGGGCTGGGTGGGTGCTCTTGGGGATTTGATTTGACT  
 CGGGTGGATTGGACTGGTTTGGGGCGACGCAGGGATGTACGCGGAGGACGAGGAGAACGG  
 CTACATCTACTTCTTCAGCACGATAGAGTTCAAGGCAGCCAAGCCCAAGCAGAAGAAGTG  
 GCCGCGGCGCGCGGCGCAGGGCGGACGGTGGAAGGCCGTCTCGGCTCCAGCCAGATGGT  
 GGAGGTTGGCGGCGTCCCCGTCGGCCGAAGCTCTCCATGGAGTTCTACGTCAAGGGGGT  
 CAGGACCAACTGGGGCATGCACGAGTTCGTGAGGATCATCGCCCCAACATCGAGGTAAA  
 CTCCCCATGTTGTATCTCCTTGTGATGATCGAATTCATTTGGTCTGATTTGGATGCAATT  
 TGTGCGATCTTGAGTTCTTGACTCGTACAATTTTTTCTCTGAACTTTCGTTTCGCCAAGG  
 TTGCGGATCTTGCCGTGTACCGCCTACACAAGCTATGGACGAACGGCGAGGAGAAGCCGG  
 GAGACCTCGCCGCGGACGTTGCCAAGAGCACGAACCAGAGTGGACAAGCGTCGGCGGCGG  
 ACTACTACCAGACTTACCAGAACGCGGTCTCTCAGGCGTATGCGTATGCGCCGCCGTACG  
 TCCTCCAGCCAGGATGGAGCCAAGGGTACCCCTACGATGTCGCGGCGGCGCCACCGACCG  
 CGCCCTGGCCTGTCTGTTGGGCGCCGCCGTCCGCGCCGGGATCCTATGACTGCTGCTACG  
 CGTCCACGTTTTTCAAGGCCGCCGCCGCCACCACCAATTGCTGCGAGCACGCTGGACAAGG  
 CGCCGATAACCAGTACCGACCACGGCGCATCAACGAACACTTCGGCGGCGACACCCGTGG  
 CGAACAACAAGCCGCCGCCGCCACCAGTTGCTGCGACAGCGACCACGCTGGGCAAGAAGG  
 GGGAGGGCAAGGGCAAGGCGCCGACGACCACCAGTACCGATCACGCCGGATCAACGAACA  
 CCTCGGCGCCACCCGCCGCGAACTACCAGCCGCCGCCGACGACGACTACGCCGCCGCTGC  
 AGGGCACGCAGCACGTCTTCGCACCCGCGCTCGTCGTCGGGCATGAGGACGAGGAGGGCT  
 ACCTCATCGTCGACGAGGTCAACACGTGGCGCAACACGCAGCAGCTCGTGCTCGAGGATG  
 ACGACGACGACGACGACGGCCGTGCCGCCGGCGCCGGTGCAGGTGAGGGTGGCGCTTCAG  
 CCTCAGGGCGGTGACAGTCTGACATCAGCAGATTAAGAGAGACCCTGAGGCGTATCAGTT  
 AATCATGCGTGTAGTTACTAGTTAGGCTCCGATTTGAGCATTGGAATTTCCAGATTTCCC  
 GACTGCTTAGCTTGGTTTTGATCTGCCCCACAAATTTCCGCCAAATTCGTAGTGTTCAAC  
 TGATCAACTTCATGCTCTTTCTGTCCGTTGGTTATTACTTTACTTGTCTACGTGAGATT  
 GCAATTCTGATCTGCAACTGCTTGAATCTGGATGATCAATAGCTGCTTCCCTGCTTT

CDS

> **ONAC118**

ATGGCGGCACCGGGAGATGGGGAAGAGAAGAAGGCCGGGAGCGGGAGGAACAAGCACGGG  
 TTCCCGCGCGGCTTCCGCTTCGTGCCCCGGGACCAGGAGCTCCTCGACATCCTCGACGAC  
 AAGCTCCGCGGCGCCCCGCTCGACCGCGGCTCGACGCCGTCTTCCACGACACGCGGATC  
 CTCGACTTCCACCCCGCCAAGCTCTACGGGATGTACGCGGAGGACGAGGAGAACGGCTAC  
 ATCTACTTCTTCAGCACGATAGAGTTCAAGGCAGCCAAGCCCAAGCAGAAGAAGTGGCCG  
 CGGCGCGCGGCGCAGGGCGGACGGTGGAAGGCCGTCTCGGCTCCAGCCAGATGGTGGAG  
 GTTGGCGGCGTCCCCGTCGGCCGAAGCTCTCCATGGAGTTCTACGTCAAGGGGGTCAGG  
 ACCAACTGGGGCATGCACGAGTTCGTGAGGATCATCGCCCCAACATCGAGGTTGCGGAT  
 CTTGCCGTGTACCGCCTACACAAGCTATGGACGAACGGCGAGGAGAAGCCGGGAGACCTC  
 GCCGCGGACGTTGCCAAGAGCACGAACCAGAGTGGACAAGCGTCGGCGGCGGACTACTAC

CAGACTTACCAGAACGCGGTCTCTCAGGCGTATGCGTATGCGCCGCCGTACGTCCTCCAG  
 CCAGGATGGAGCCAAGGGTACCCCTACGATGTCGCGGCGGCGCCACCGACCGCGCCCTGG  
 CCTGTCTGTTGGGCGCCGCCGTCCGCGCCGGGATCCTATGACTGCTGCTACGCGTCCACG  
 TTTTCAAGGCCGCCGCCGCCACCAATTGCTGCGAGCACGCTGGACAAGGCCGCCGATA  
 ACCAGTACCGACCACGGCGCATCAACGAACACTTCGGCGGCGACACCCGTGGCGAACAAC  
 AAGCCGCCGCCGCCACAGTTGCTGCGACAGCGACCACGCTGGGCAAGAAGGGGGAGGGC  
 AAGGGCAAGGCGCCGACGACCACCAGTACCGATCACGCCGATCAACGAACACCTCGGCG  
 CCACCCGCCGGAACCTACCAGCCGCCGCCGACGACGACTACGCCGCCGCTGCAGGGCACG  
 CAGCACGTCTTCGACCCGGCGTCGTCGTCGGGCATGAGGACGAGGAGGGCTACCTCATC  
 GTCGACGAGGTCAACACGTGGCGCAACACGCAGCAGCTCGTGCTCGAGGATGACGACGAC  
 GACGACGACGCGCGTGCCGCCGGCGCCGGTGACAGGTGAGGGTGGCGCTTCAGCCTCAGGG  
 CGGTGA

Protein

> **ONAC118**

MAAPGDGEEKKAGSGRNKHGFRFRFVPRDQELLDILDDKLRGAPLDRALDAVFHDTRI  
 LDFHPAKLYGMYAEDEENGYIYFFSTIEFKAAKPKQKKWPRRAAQGGRWKAVLGSSQMVE  
 VGGVPVGRKLSMEFYVKGVRTNWGMHEFVRIIGPNIEVADLAVYRLHKLWTNGEEKPGDL  
 AADVAKSTNQSGQASAADYYQTYQNAVSAAYAYAPPYVLQPGWSQGYPYDVAAAPPTAPW  
 PVCWAPPSAPGSYDCCYASTFSRPPPPPIAASTLDKAPITSTDHGA STNTSAATPVANN  
 KPPPPPVAATATTLGKKGEGKGKAPTTTSTDHAGSTNTSAPPAANYQPPPTTTTPPLQGT  
 QHVFAPGVVVGHEDDEEGLIVDEVNTWRNTQQLVLEDDDDDDDDGRAAGAGAGEGGASASG  
 R\*

**Gene Structure**

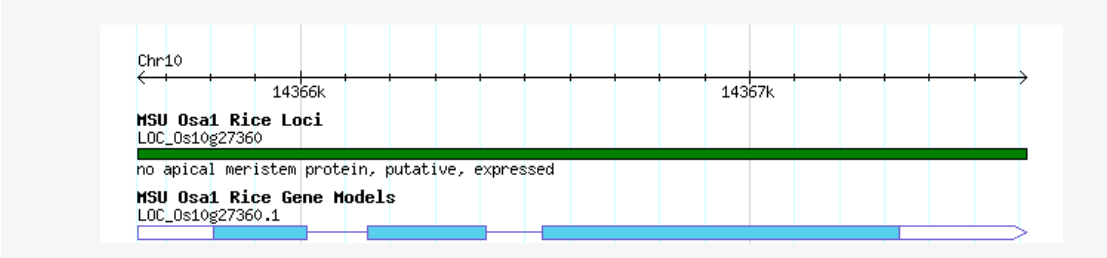

**LOC\_Os10g27390 (ONAC119) sequence information**

**Genomic sequence length:** 2122 nucleotides

**CDS length:** 1632 nucleotides

**Protein length:** 543 amino acids

**Putative Function:** no apical meristem protein, putative, expressed

Genomic Sequence

> **ONAC119**

GCGCGCGACACGCGACGTCGACACGAGCTCTCGTCTCGCCGCGTCCACACCAATCGGCGC  
 CGCCGTGTAGCGAAGACTAGCTAGCTCCCTCTCCTCCGCGAGACCGGCCGATCGATCGGG  
 GCATCGCGCGGCGCGCGCGGGCGGGGCTAGCTGGGCATGGCGGCACCGGAGGATGGGG



AGGACAAGAATTTTCGGGAAGAACAAGCACGGGCTCCCGATCGGCTTCTACTTCGCGCCCA  
 CGGACCAGGAGCTCCTCGCCATCCTCGAGGCCAAGCGCCTCGGCCGCCGCTCTCCCGCG  
 CGCACGACGCCTTCTTCCACGACATCCGCATCCTCGACTTCCACCCCGCCGAGCTCTACG  
 GTATCCACCCCTTCTCCGTCTCTCTCCTTGTCCCCCTTCTTCTTCTTCTCCGGCGCCGGCGA  
 CCGGCTTGGTGGTGGGGATTTGATTTCGGGTGGATTTGGAATGATTTGGGGGCGGCGCAGA  
 GAAGTACGCCAAGGACGAGGAGAAGGGCTACTTCTACTTCTTCAGCAAGAGGGAGTTCCC  
 GACGAGCAGCAAGAAGCGGCCGCTGCGGGTGGCGGAGGGCGGCGCGTGGAACAGCTCCGG  
 CGCCGTTTACAAGGTGGTGAAGAGCAGCAAGTCCGGCGGCGGCTACGACGTCGGCCATAA  
 GAAAACCCCTCGTGTTCCACCAGCGTTTCCCCGGCGACAAGGAGGCCGTCAAAACCAACTG  
 GGCCATTTCAGGAGTTCACCAGGATCATCGGGCCCCAGAACGAGGTATAAATCAAAAATCA  
 AGCCACGATTTATTCCACATTTTCATCTTCTTGTGTGAGGATTGAATTGATCGAGTTCA  
 TCTTGATCTCATTTCGGGTGGTGCAAATTTGTGCCGAATTTTGACTCAGAGTTTCTTGAA  
 CTTTAATTTGCCAAAAGGTTCCGGATCTTGCCGTGTACCGCCTGTACAAGATGAGGAAGG  
 AAGGCAGGGAGACGCCTGCAGACCTCGCCGCCGACGAGGCCGCGGCCGCGGCCGCGCATGA  
 ACAACCGTGGAACAACAAGCGTCGGCTGCGGCCATGGCGCTGCCACCGCCGGCGACGGGCC  
 TGCTGGGGGAAGGATGATGTCCATGGCGGACAAGGCGAACATGGCCTCGACATCAAAGG  
 CGTACGGGCCGTCAAAGTCAAGCTCATCGCAACTCCAGCAGGATGCGGCGGCGGCGGCGG  
 CGCCACCGAACGCAGCAGGGGCTAGCAACTGGGCGCCGAGGCCTTGCAACTGCCGGGAGT  
 GCGCGCCGGCGGCGGGACACTATGGCTACTTCGCGGCCGCGGCGGCCATGAACAACCGTG  
 GCGGACAAGCGTCGGCTGCGGCCAAGGCGCTGCCACTGCCGGCGCCGGGCCCTGCCTGGGG  
 TAAGGAGGATGTCCATGGCGGACAAAGCGAACATGGCCTCGACATCAAAGGCGTACGCGA  
 CGTCGCAGTCAAGCTCATCGCAACTCCAGCAGGGTGCGGCTGCGGTGGCGGCGCCGCCGA  
 ACGCAGCAGGGCCTAGCAACTGGGCGCCGAGGCCTTGCAACTGCCGGGAGTGCGCGCCGG  
 CGGCGGGACAGTATGGTTACTTCGCGTCCATGGTTCCACGGCCGTCGCTGGACCGGAAGG  
 GCAAGGGCAAGGCGCCGATGGACTGTGCCGAGCAGGCCGGCGGCGGCGGCGGCTGTCACG  
 CGGAGTCAACGAGCACTCCGGCGCCGCCGAAGGGCGCCGAGTACTACGGATGCAGCGTCG  
 CCGTCGAGGATGATGACGAAGAATTGCTGAAGTTTCTGCAGGCGATGGTGAGGGGCGAGG  
 AGGTGGAGGGTGATGGCGACCACGCCATGGCCGACGAGCGCGGCCCGCAGCAGGGCTCCT  
 CCCCCGTGGCGGCGGCGGCGGCCCTCCGGCTCCGCGCCTGCAGGTCATGACGGTCGCCGTG  
 GCTCGCTGCAGGGTGGCCACCATGGATCCTCCTCCCCACCTCATTGGCGGCCGCCGCCG  
 CCACCGGCGACGACGTCACATCTGCCGCCAGTGACAGGTGACGACGTCAGTGGCAGTCAGC  
 AGGAAGACCACCTGCGCGTTGAACACTGAAATTTGAAATTTGAATTTGAAATCTGGGAC  
 AAATTTTCGTCGAATTTGCAGT

CDS

# > **ONAC119**

ATGGCGCACCCGAGGATGGGGAGGACAAGAATTTTCGGGAAGAACAAGCACGGGCTCCCG  
 ATCGGCTTCTACTTCGCGCCACGACCAGGAGCTCCTCGCCATCCTCGAGGCCAAGCGC  
 CTCGGCCGCCCGCTCTCCCGCGCGCACGACGCCTTCTTCCACGACATCCGCATCCTCGAC  
 TTCCACCCCGCCGAGCTCTACGAGAAGTACGCCAAGGACGAGGAGAAGGGCTACTTCTAC  
 TTCTTCAGCAAGAGGGAGTTCCCGACGAGCAGCAAGAAGCGGCCGCTGCGGGTGGCGGAG  
 GGCGGCGCGTGGAACAGCTCCGGCGCCGTTTACAAGGTGGTGAAGAGCAGCAAGTCCGGC  
 GGCGGCTACGACGTCGGCCATAAGAAAACCCCTCGTGTTCCACCAGCGTTTCCCCGGCGAC  
 AAGGAGGCCGTCAAAACCAACTGGGCCATTTCAGGAGTTCACCAGGATCATCGGGCCCCAG  
 AACGAGGTTCCGGATCTTGCCGTGTACCGCCTGTACAAGATGAGGAAGGAAGGCAGGGAG

ACGCCTGCAGACCTCGCCGCCGACGAGGCCGCGCCGCGGCCATGAACAACCGTGGA  
 CAACAAGCGTCGGCTGCGGCCATGGCGCTGCCACCGCCGCGACGGGCCTGCCTGGGGGA  
 AGGATGATGTCCATGGCGGACAAGGCGAACATGGCCTCGACATCAAAGGCGTACGGGCCG  
 TCAAAGTCAAGCTCATCGCAACTCCAGCAGGATGCGGCGGCGGCGGCGGCCACCGAAC  
 GCAGCAGGGGCTAGCAACTGGGCGCCGAGGCCTTGCAACTGCCGGGAGTGCGCGCCGCGG  
 GCGGGACACTATGGCTACTTCGCGGCCGCGGCGGCCATGAACAACCGTGCGGACAAGCG  
 TCGGCTGCGGCCAAGGCGCTGCCACTGCCGCGCCGGGCCTGCCTGGGGTAAGGAGGATG  
 TCCATGGCGGACAAAAGCGAACATGGCCTCGACATCAAAGGCGTACGCGACGTCGCAGTCA  
 AGCTCATCGCAACTCCAGCAGGGTGCGGCTGCGGTGGCGGCGCCCGAACGCAGCAGGG  
 CCTAGCAACTGGGCGCCGAGGCCTTGCAACTGCCGGGAGTGCGCGCCGCGGCGGGACAG  
 TATGGTTACTTCGCGTCCATGGTTCCACGGCCGTCGCTGGACCGGAAGGGCAAGGGCAAG  
 GCGCCGATGGACTGTGCCGAGCAGGCCGCGGCGGCGGCGGCTGTCACGCGGAGTCAACG  
 AGCACTCCGGCGCCGCCGAAGGCGCCGAGTACTACGGATGCAGCGTCGCCGTCGAGGAT  
 GATGACGAAGAATTGCTGAAGTTTCTGCAGGCGATGGTGAGGGGCGAGGAGGTGGAGGGT  
 GATGGCGACCACGCCATGGCCGACGAGCGCGGCCCGCAGCAGGGCTCCTCCCCGGTGGCG  
 GCGGCGGCGGCTCCGGTCCGCGCCTGCAGGTCATGACGGTCGCCGTGGCTCGCTGCAG  
 GGTGGCCACCATGGATCCTCCTCCCCACCTCATTGGCGGCCGCCGCCACCGGCGAC  
 GACGTCACATCTGCCGCCAGTGCAAGTGACGACGTCAGTGGCAGTCAGCAGGAAGACCAC  
 CCTGCGCGTTGA

Protein

#### > **ONAC119**

MAAPEDGEDKNFGKNKHGLPIGFYFAPTDQELLAILEAKRLGRPLSRAHDAFFHDIRILD  
 FHPAELYEKYAKDEEKGYFYFFSKREFPTSSKKRPLRVAEGGAWNSSGAVYKVVKSSKSG  
 GGYDVGHKKTLVFHQRFPGDKEAVKTNWAIQEFTRIIGPQNEVPDLAVYRLYKMRKEGRE  
 TPADLAADAAAAAAMNRRGQASAAAMALPPPATGLPGGRMMSMADKANMASTSKAYGP  
 SKSSSSQLQQDAAAAAAPPNAAGASNWAPRPCNCRECAPAAGHYGYFAAAAAMNRRGQA  
 SAAAKALPLPAPGLPGVRRMSMADKANMASTSKAYATSQSSSSQLQQGAAVAAPPNAAG  
 PSNWAPRPCNCRECAPAAGQYGYFASMVPRPSLDRKGKGKAPMDCAEQAGGGGGCHAEST  
 STPAPPKGAEEYGCSSVAVEDDDELLKFLQAMVRGEEVEGDGDHAMADERGPQQGSSPVA  
 AAAASGSAPAGHDGRRGSLQGGHHGSSSPTSLAAAAATGDDVTSAAAGDDVSGSQEDH  
 PAR\*

#### Gene Structure

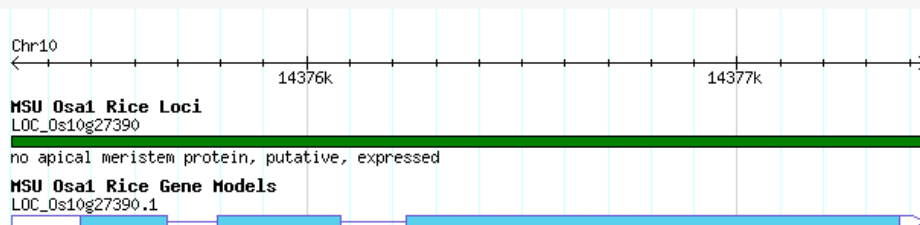

#### LOC\_Os10g33760 (ONAC120) sequence information

**Genomic sequence length:** 2310 nucleotides

**CDS length:** 975 nucleotides

**Protein length:** 324 amino acids

**Putative Function:** No apical meristem protein, putative, expressed

#### Genomic Sequence

##### > ONAC120

AAGAAGAAGAGATCATATTTAGCTATATCTCTAGCTAGCTGCGTCTCGTCTTCTCCAAGC  
TATTGTTACTTAGCTAGCTTTAGCTAGGAGAGTAAAAGATCGAGTGATCATTAGTGAGTT  
TGATTAGTTGATTTTGTGGGGTTGAGATCGAAGAGATCGATGGCCGGGCTGAGGGAGAT  
GGAGTCGACGCTGCCGCCGGGGTTGAGATTCTGCCCCAGCGACGAGGAGCTCATCTGCTT  
CTACCTCCGCAACAAGGTCGCCAACCCGCGTCGCCTCCGGCACCCCTCGTCGACGTCGA  
CCTTCACGCCCCGAGCCATGGGAGCTTCCCGGTAACCTTACCCTACAAACCTACTTTGT  
CCAGACACATAGTCAGAAGTATTGTATTTTTTTTTTACAATGAATTGAGATCGGGTGCG  
AAATTTCACTGTACACAAGAGAGATACAGTGTGGTGCCTTGATAATTGTTTGATAATTA  
GTTAATCATTTGGGGTTCCTTGGAGCACAAGCATATAGCTATAGGTGTAGATAGATAGAT  
ACAGAATGTGCACGAGATGATCATCAGCTAGCTATTATAGCTTGCAAGCAATCATAAAAT  
TAGCGGCAATAATTTTCGTGATGGTTCCTTGGCTAGCTAGCTCACAAGTCACAAGACTCCA  
AGTCTCGCAAGCTAGAGACCAATAACGACCTGTTTATATGTCCACTTCTAGCTAGCTAGG  
GCCACTCAGAGAATTATAAAAAACGTCACTGTTTGCCAGTAACAGTGACCGCTGTAACACT  
TCACGTGCAAGCGTATCCAATCCCTCTCTCATGATCTCACGTACCTAGCTCTACAGTGTA  
GGTACAGATACAACAGTTAATTAGTATCTCTAATGTATATTATTATTAACCTTTGATGCTT  
TAATGAAGGGTGTAACATAGCACTAAATGGTTATTAATTAGCTGATGATTGGATGCATAT  
GAGAGCTTAATTAGTTTTTATTTTGTAACTTTTTTCAGAGGTGGCTAAGCTCACTGCAG  
AGGAGTGGTACTTCTTCAGCTTCAGAGACCGGAAATATGCGACAGGGTCACGGACGAACC  
GTGCGACCAAGACAGGTTACTGGAAGGCCACGGGGAAGGACCGGATTGTCCATGAGGGTA  
CAACACGAGCGGTGGTCGGGATGAGGAAGACGCTGGTTTTTTACCTCGGCCGTGCCCCTA  
ATGGGCAAAAAGACGACATGGGTGATGCATGAGTTCCGCCTTGAAACACCTAACTCCCAAC  
CTAAGGTGTGTGCCCTAGCTCTATATTACCTTTCTCGTAGAAATATTTTTCAATAGCTAA  
GCACTACTACTTAATTTGGTGTGCTCAGATTCACATAATAATTAATCATGGTCTATGTAT  
TCTTTTGTGTCAAGCAGGAGGATTGGGTGCTATGTAGGGTGTGACAAGAAGAAGCCAT  
CGACAATAGAAGCCGAGGGTGGCGGAAGCAGTGGCAGCGACCTTTTCATTCCCGGTGCCA  
CCGATGGCTCTACTGACCCCTCCTCGCCGACGACGATGGCACCTCTCCTTGGCTCATCGC  
CCGATCCGACAGTGGTGGACAGGTTTCGACCACCGGTCAGCGCGGTGCCACCATTAATGG  
TACTCATGCAAGGTGGTGGGGACCAAAATGATCAGTGGTAGCGGTGTCCACTGCAGCAACA  
ACGACAACCTCCGGTAGTAGCAGCGCACTGCTTAACCTGACGATGCTGCAATACAGCTTCC  
TAGAACATCGGCCAACTGGTGACGACATGGCGGTGGGGGCCCCACTTTGGAACATGCCAGG  
GTGGCAACAACGATGCCACGATGGCACTTGGGATGGGGTTTGAGGAGCATGGCATGGGAG  
AGATCATAGAGATGGAACCAGCATGGCGCCAAGGTGGTAGCAACTGCGTGTACAGGGACG  
AGCTCTACTTCTAGCAGAAAGTAGTACAATGGATTAATTAATGATTTGCATGTGTTAGA  
GTTCACTTAAATTCAGAAAAATATGTAGAGCTTAGAAGAGGTTTGCTAGTTTGTGATTAGA  
GTGTGATTATTAATTAAGGTGGAGTTAATTAAGGGGTCGATTAGTTTCAGTGGTCGTGAT  
ATGAAAATATTTGTGTAATTACTCAGTTTGTAGGTGAGCCATATATCAAACAACCTTAGG  
GAAAGGGGATGATCAAGAATTCAGAACCAGGATGAATTTGATATTCTTGTACTTTAAAAA  
ATGTAATGATGGGAATAATATTTAAATCTGATTGAGCCAAGCTCTTCAGGAAGAGAGAAT  
ATATTTTCTGCCACTGAGTTCACCTTTGTTC

CDS

> **ONAC120**

ATGGCCGGGCTGAGGGAGATGGAGTCGACGCTGCCGCCGGGGTTTCAGATTCTGCCCCAGC  
GACGAGGAGCTCATCTGCTTCTACCTCCGCAACAAGGTCGCCAACCACCGCGTCGCCTCC  
GGCACCCCTCGTCGACGTCGACCTTCACGCCCCGAGCCATGGGAGCTTCCCGAGGTGGCT  
AAGCTCACTGCAGAGGAGTGGTACTTCTTCAGCTTCAGAGACCGGAAATATGCGACAGGG  
TCACGGACGAACCGTGCACCAAGACAGGTTACTGGAAGGCCACGGGGAAGGACCGGATT  
GTCCATGAGGGTACAACACGAGCGGTGGTCGGGATGAGGAAGACGCTGGTTTTTTACCTC  
GGCCGTGCCCCAATGGGCAAAAAGACGACATGGGTCATGCATGAGTTCCGCCTTGAAACA  
CCTAACTCCCAACCTAAGGAGGATTGGGTGCTATGTAGGGTGTGTTGACAAGAAGAAGCCA  
TCGACAATAGAAGCCGAGGGTGGCGGAAGCAGTGGCAGCGACCTTTTCATTCCCGGTGCC  
ACCGATGGCTCTACTGACCCCTCCTCGCCGACGACGATGGCACCTCTCCTTGGCTCATCG  
CCCGATCCGACAGTGGTGGACAGGTTCCGACCACCGGTCAGCGCGGTGCCACCATTAATG  
GTACTCATGCAAGGTGGTGGGGACCAAAATGATCAGTGGTAGCGGTGTCCACTGCAGCAAC  
AACGACAACCTCCGGTAGTAGCAGCGCACTGCTTAACCTGACGATGCTGCAATACAGCTTC  
CTAGAACATCGGCCAACTGGTGACGACATGGCGGTGGGGGCCCCACTTTGGAACATGCCAG  
GGTGGCAACAACGATGCCACGATGGCACTTGGGATGGGGTTTGAGGAGCATGGCATGGGA  
GAGATCATAGAGATGGAACCAGCATGGCGCCAAGGTGGTAGCAACTGCGTGTACAGGGAC  
GAGCTCTACTTCTAG

Protein

> **ONAC120**

MAGLREMESTLPPGFRFCPSDEELICFYLRNKVANHRVASGTLVDVDLHAREPWELPEVA  
KLTAEEWYFFSFRDRKYATGSRTNRATKTGYWKATGKDRIVHEGTTRAVVGMRTLVFYL  
GRAPNGQKTTWVMHEFRLETPNSQPKEDWVLCRVFDKKKSTIEAEGGSSGSDLFIPGA  
TDGSTDPSSPTTMAPLLGSSPDPTVVDRFDHRSAAVPPLMVLQMGGGDQMISGSGVHCSN  
NDNSGSSSALLNLTMLQYSFLEHRPTGDDMAVGAHFGTCQGGNNDATMALGMGFEEHGMG  
EIIEMEPAWRQGGSNVCYRDELYF\*

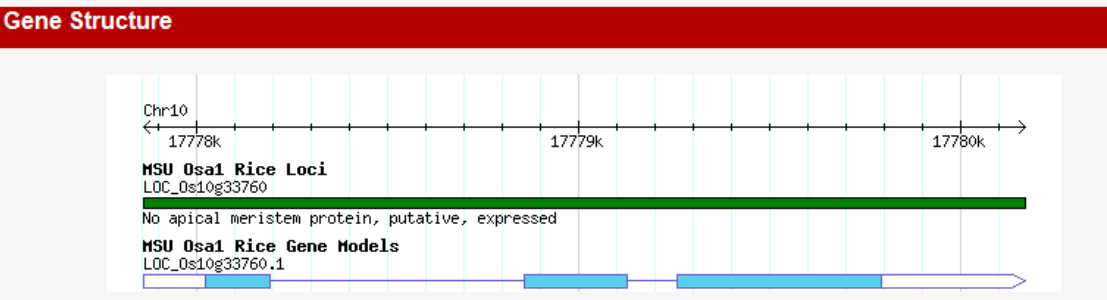

**LOC\_Os10g42130 (ONAC121) sequence information**

**Genomic sequence length:** 2586 nucleotides

**CDS length:** 990 nucleotides

**Protein length:** 329 amino acids

**Putative Function:** no apical meristem protein, putative, expressed

## Genomic Sequence

> **ONAC121**

CCCCAATTCACAAAACGAAACCCAAACACTCTCCTATTCCTCCTCTTATTTCTTAATTG  
GTCAGCACCTAGCTAGCAAGAATCTCTCAACTCTTCTTCTTCTTCTCGTCCATA  
ATTGCTCCTCCAATTGATATCTCTGTACGTAGTTCAGTTCAGTTCATCAAGGAGCCTGA  
ACTGAATTCCTTGGTTGTTTAGTTCTTGCTAGCTAGGGGATTGACCATAGGATAATGATC  
TTGAACTCCGGAGGCAGCTTCATCAACACCTGTCCGCTGGATTCCGAGCAGCTCAAGACC  
TTCTACTTCTGGATCTTCCCAATCTTCAATAGATACTGCCTCTGCCGCCTCTAATTGACA  
AGCATTCAACCATATATATGTGATAAAATTGTGCCAATCTGCCTCAAGTATTAGCATTTAG  
GCAAATTGACACTACATCTAGCTAGCTAGCTAGCTTTGCTCCGATTAGTAGTATTGTTTG  
CCTCTTCTTTCCATTGTAAACCTTCGATTGAACAATTAGGTTTGCGCTTGCTTGCCCAAG  
ATATTTGAATAGGTTTTGCAAGGTACATTTGTCTGAAATTCAGTCGGTTGATTTGATCA  
TGGGTACCATGACTCTGCCCCGGGTTTCCGGTTCCACCCGACCGACGATGAATTGGTCG  
GCTACTACCTCAAGAGGAAAAGTCGACAGCCTCAAGATCGAGCTTGAGGTCATCCCTGTCA  
TTGATCTCTACAAGTTCGAGCCATGGGAGCTACCAGGTTTGTGCCTTTGTCAATTTTCC  
ATTTGATTCATGTTACTTCATTTTTGGTAGTTGAAATTCTGCATCAAATATATTTAGCAC  
AAGTTGTTGTTTCATAGTTGAGTTTTGGTCGTGTCAACATTGTAACTTTTGGTGAAAAC  
AGTTTTAACTGTGGAAAGTAGCTAAACAATATGCAAAGCCTTTGACCTGCTAGCCTTTTT  
TTTTTCGCAAATCTATTCCTGAAAAGAGAGAAAACAGGTGGTAGAAAATTGGAAAGGAACA  
TGCAGAATTTTTCCCAGAGGCGTTTCTCATTTTCTAGACAGATAAAAGCGACCTTTTTAC  
ACGGGCATCTGGGCTTTTTCTCCCTAGGCCGGTTGCTGATAAGTCTTTTTAATCACACA  
CCTTTTAATTTTAGTATTCAAGAAATGAATTCCTCCTGCAACCGCAAAGCCAACTTTTCG  
GATATTCTCTTGCAATTTGGTTTCGCCTTGGTGACATAAAATGATAATAAATATGATCAA  
ATCAAATCTGAAGAAGAAAATGATTATGAAAATGTGCAGAGAAGTCGTTCTTGCCGAAG  
CGTGACCTGGAGTGGTTCTTCTTCTGCCCACGAGACCGGAAGTATCCGAACGGGTCGCGG  
ACGAACAGGGCGACGAGCACC GGCTACTGGAAGGCCACCGGCAAGGATCGCAAGATCGCC  
TGCGCCGGCGAGGTCTTCGGCCTCCGCAAGACGCTCGTCTTCTACAAGGGTCGCGCTCCC  
GGCGGCGAGCGCACC GACTGGGTCATGCACGAGTACCGCCTCTGCCAGGACCTCGCCCAT  
GGCGTCTCCAATTCATCGTGAGTTCATTTCTCCGATTGCCTTTGCTTTGCTTGCTGCG  
ACGGCAACAATGGCGCGCTGATCGGATGAGATGTGTTCTGGTGCAGGGGGCGTACGCGCT  
GTGCCGCGTGATCAAGAGGCACGAGGCGGGCCTCCATGGCGAGCCGCCGGCGGCGAAGGC  
GAAAGGAATGATCAGCAAGGTGTCGAGCAGCTCGTCCCTTGTCACCGTCGAACACCAGCT  
CAGCAGCCGGGGCAACGCCTCGCCGTCGTTACGCCCACCAACAATGGCAGCCCGCTCGT  
CGACGAGATGTTCTGTCGGCGGCGGCGGCGGACCCGTTCCAGCTGCTTCCGAGCTGCGT  
CCCGTACCATGGCGGCGACGCTGCGGGTTCGACTTGCCGCCGCTGTGCATGCCTCAGAC  
TCAGGACCCGTTCTTCTCCGACGCCGGCTTCACGCAGGCAGCGCTCCTCTCTACGGCGA  
CGTCATGGGAAGCGTGTCGGAGCACGAGCTCAAGTGGGACACCCTGGGCGGCTACTCCGG  
CGGCGGCGGTGGGGAGCTCTGGAACGCGGCGGCGGCGCCGCTGCTGTGCAGGCAGGCCAG  
CGACGGCGACGACCTCACGGCGTGGTTCACGGCCGCCGACGACAACATGTCCGTCTTCTG  
AACGAGTCAACCATGACACGTGTGCTCCCGGGTTAGTTACACATGGCGGTATATTTTTGA  
GCCATTCTAACTGGGGCCCCACGTGTGAGCCACTACAGACATATGTCATCTATTATATA  
TGCATAAATATGCCTATAATCTGTATGGATACAGAGGTGATGAGCTTTCTTTTAGTTACT  
GGCTGTAATACATCTTCTCTGTAGCATCATACAGCAGAGCTGGGTTATGTATCCTCTTCA  
GTTAATGTACTTGTAACACTGATCTGTAAGCTAAAAGGTAGTGTGCTGGTAGATCAATC

TTCATCTCAAACAGTGCAGTTTCAATTCATACAATATATATATTATAAAAAGTTCCAATTC  
ATAGTA

CDS

> **ONAC121**

ATGGGTACCATGACTCTGCCCCGGGTTTCCGGTTCACCCGACCGACGATGAATTGGTC  
GGCTACTACCTCAAGAGGAAAGTCGACAGCCTCAAGATCGAGCTTGAGGTCATCCCTGTC  
ATTGATCTCTACAAGTTCGAGCCATGGGAGCTACCAGAGAAGTCGTTCTTGCCGAAGCGT  
GACCTGGAGTGGTTCTTCTTCTGCCCACGAGACCGGAAGTATCCGAACGGGTCGCGGACG  
AACAGGGCGACGAGACCCGGGTACTGGAAGGCCACCGCAAGGATCGCAAGATCGCCTGC  
GCCGGCGAGGTCTTCGGCCTCCGCAAGACGCTCGTCTTCTACAAGGGTCGCGCTCCCGGC  
GGCGAGCGACCCGACTGGGTCAATGCACGAGTACCGCCTCTGCCAGGACCTCGCCCATGGC  
GTCTCCAACTTCATCGGGGCGTACGCGCTGTGCCGCGTGATCAAGAGGCACGAGGCGGGC  
CTCCATGGCGAGCCGCCGGCGGCGAAGGCGAAAGGAATGATCAGCAAGGTGTCGAGCAGC  
TCGTCCCTTGTCACCGTCGAACACCAGCTCAGCAGCCGGGGCAACGCCTCGCCGTCGTTC  
ACGCCCACCAACAATGGCAGCCCGCTCGTCGACGAGATGTTCTGTCGGCGGCGGCGGCGGC  
GACCCGTTCCAGCTGCTTCCGAGCTGCGTCCCGTACCATGGCGGCGACGCGTGCGGGTTC  
GACTTGCCGCCGCTGTGCATGCCTCAGACTCAGGACCCGTTCTTCTCCGACGCCGGCTTC  
ACGCAGGCAGCGCCTCCTCTCTACGGCGACGTCATGGGAAGCGTGTGCGAGCACGAGCTC  
AAGTGGGACACCCTGGGCGGCTACTCCGGCGGCGGCGGTGGGGAGCTCTGGAACGCGGCG  
GCGGCGCCGCTGCTGTGCAGGCAGGCCAGCGACGGCGACGACCTCACGGCGTGGTTCACG  
GCCGCCGACGACAACATGTCCGTCTTCTGA

Protein

> **ONAC121**

MGMTLPPGFRFHPTDDELVGYYLKRKVDLSLKIELEVIPVIDLYKFEPWELPEKSFLPKR  
DLEWFFFCPRDRKYPNGSRTNRATSTGYWKATGKDRKIACAGEVFGLRKTLLVYKGRAPG  
GERTDWMHEYRLCQDLAHGVSNIIGAYALCRVIKRHEAGLHGEPPAAKAKGMISKVSSS  
SSLVTVEHQLSSRGNASPSFTPTNNGSPLVDEMFGGGGGDPFQLLPSCVPYHGGDACGF  
DLPLCMPQTQDPFFSDAGFTQAAPPLYGDMGVSSEHELKWDTLGGYSGGGGGELWNAA  
AAPLLCRQASDGDDLTAWFTAADDNMSVF\*

**Gene Structure**

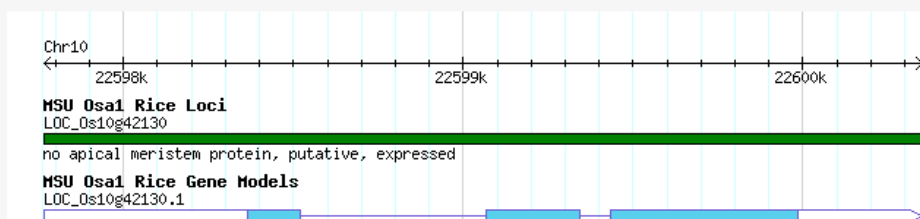

**LOC\_Os11g03300 (ONAC122) sequence information**

**Genomic sequence length:** 2125 nucleotides

**CDS length:** 1176 nucleotides

**Protein length:** 391 amino acids

**Putative Function:** NAC domain transcription factor, putative, expressed

#### Genomic Sequence

##### > ONAC122

```

AAAAATTTCAATCCTTCCTCTTCCTTAGCTTATTAGCTTCCTTCCTTCACTAGTGCCAGT
TTTCCTCCTACCTAATCTAAGCTAGCCAGGTCGTCATCTTCTTCCTTCAGCTCACGCTGA
CCAAACACCATCTGTTATTCTGTTTGTGTTTTTTTTAAAAAAGAAAAAATCTAGC
TAGGCGAGCCGATTGAAGGAGCTGAGCATGCCGAGCAGCGGCGGCCATGCCTGCCCTT
CCACCAGGCTTCCGCTTCCACCCACCGACGAGGAGCTCATCGTTCCTACCTCATGAAC
CAGGCCGCTCCGTCAAGTGCCCCGTGCCAATCATCGCCGAGGTCAACATCTACAAGTGC
AACCCATGGGACCTTCCTGGTAACTAACTAACTAATCACCATACATATATATACTATCCA
TGTATCAATTAAGCTCGATCAAAATTAATGCCTTCAAAGTACCAAATTTAACTTTGGGCT
TTGAAAATGGATATGGGATGTTGCAGGTAAGGCTTTGTTTCGGCGAGAACGAATGGTACTT
CTTCAGCCCGAGGGACCGCAAGTACCCCAACGGCGCTCGCCCAACCGCGCCGCGGCTC
GGGGTACTGGAAGGCCACCGGCACCGACAAGTCCATCCTCTCCACTCCGACCAGCGACAA
CATCGGCGTCAAGAAGGCCCTCGTCTTCTACAAGGGCAAGCCTCCCAAGGGCGTCAAGAC
CGACTGGATCATGCACGAGTACCGTCTCACCAGGCACATCAGCTAACAGCACCACCACCAC
AAAGCAGCGTAGAGCGTCATCCATGACCATGAGGGTGAGATTAATTACTTAACTAATTTA
GTTTTCTCTTCGTCGTACGTCTTGTGTTGAAAGCTACTTGTGTTTGGCATAAAGAAGGAG
CAACGTGCATGTTGCTCTTAGTTAACTCAGTACAAAGTCAAATGAGTTGATGTTGATTGA
GCTTGTGTTTTATTCTTGGTATATATTTTATTTTTTAGAAAAGGGTTAAAGTTGCACGCTT
CTAATTATTGTTTACTGCATTTGTGATTGTCCATCAGCTGGACGACTGGGTGCTGTGCAG
AATCCACAAGAAGAGCAACGACTTCAATTCCTCTGACCAACACGACCAAGAACCCGAGGA
ATCAACCGTCGAACAGCTTGAAGACATCCATGACAACAACTCCTCTGAACAACCTCCAGC
TCCAGCTGACATGAACAACCAACAGTCAGATTTCCAGCCCATGACGGCGATGAGCATGAG
CAAGTCATGCTCCCTCACCGATCTCCTCAACACCATCGACTGCGCCGCGCTCTCGCAGTT
TCTCCTCGACGGCTCATCCGACGCCATCGTGAGCCTCCTGCTCCTCCAGCCCCCTAAT
ATACACAACACCTCATCCAAATTACCAAACTAACTATAACATTAACAGCAACAGCAG
CATGCCACACGCCTTCGAGTCACGCCTAGATCATCACGATGGTTACGTTAACAATTATAA
TGTTAATGGCCTGAGGAGGAAGAGAATGATGGCGTGTAGTGCAACTTCCTTTGATGATGG
CAGCAGCAGCAATGACTTTGTGTCATGCCGTTGTCAAGAAACCGCAGCTGCTGCCAAGTGA
TTCGAGGGGTAGTGGTTTTGGAGGAGGTTACTGCAACCAGCAGCTTTCAGAGACTGCGAC
TGGCTTTCAGTTTCAGAACGGCAATCTGCTGAGCCATCCATTTCTCTGAACAATCATCT
GCAGATGCAGTAGTAGGCGTCTAGATCCCGTTTACCGATCGATCTGAAGAGAGGTGAATT
AATTTCAACGAATGAACTACAGATTACAGAGAGGAAGATACTGATTGTTCCATTTGTGAT
TTATTTTGAGGAGTTGCATGGGCAGATAGACAAACAGACGGAATTCTTGATGTAACCGAT
GCAAGGAAAGATTACAGATTTCTTCCTATGGCATTAAATTTGTGAGTTTTTTTTTGTGTTCA
TTTTTCATGTACAAGAATGTAAATTATAAATGGTAATATCGTGCAAGCTAGTACTCAAGCC
AATTTATATGATAATCTTTATGCATGTTTCTTAATTATTCTGGTATCAAGCACACGAAAG
AAACATGCTACTTTGTCGTTGATTC

```

#### CDS

##### > ONAC122

ATGCCGAGCAGCGGCGGCCATGCCTGCCCTTCCACCAGGCTTCCGCTTCCACCCCACC  
GACGAGGAGCTCATCGTTCACTACCTCATGAACCAGGCCGCCTCCGTCAAGTGCCCCGTG  
CCAATCATCGCCGAGGTCAACATCTACAAGTGCAACCCATGGGACCTTCCTGGTAAGGCT  
TTGTTTCGGCGAGAACGAATGGTACTTCTTCAGCCCCAGGGACCGCAAGTACCCCAACGGC  
GCTCGCCCCAACCGCGCCCGGGCTCGGGTACTGGAAGGCCACCGGCACCGACAAGTCC  
ATCCTCTCCACTCCGACCAGCGACAACATCGGCGTCAAGAAGGCCCTCGTCTTCTACAAG  
GGCAAGCCTCCCAAGGGCGTCAAGACCGACTGGATCATGCACGAGTACCGTCTCACCGGC  
ACATCAGCTAACAGCACCACCACCAAAAGCAGCGTAGAGCGTCATCCATGACCATGAGG  
CTGGACGACTGGGTGCTGTGCAGAATCCACAAGAAGAGCAACGACTTCAATTCCTCTGAC  
CAACACGACCAAGAACCCGAGGAATCAACCGTCAACAGCTTGAAGACATCCATGACAAC  
AACTCCTCTGAACAACCTCCAGCTCCAGCTGACATGAACAACCAACAGTCAGATTTCAG  
CCCATGACGGCGATGAGCATGAGCAAGTCATGCTCCCTCACCGATCTCCTCAACACCATC  
GACTGCGCCGCGCTCTCGCAGTTTCTCCTCGACGGCTCATCCGACGCCATCGCTGAGCCT  
CCTGCTCCTCCCAGCCCCCTAATATACACAACACCTCATCCAAATTACCAAACACTAAAC  
TATAACATTAACAGCAACAGCAGCATGCCACACGCCTTCGAGTCACGCCTAGATCATCAC  
GATGGTTACGTTAACAATTATAATGTTAATGGCCTGAGGAGGAAGAGAATGATGGCGTGT  
AGTGCAACTTCCTTTGATGATGGCAGCAGCAGCAATGACTTTGTGCATGCCGTTGTCAAG  
AAACCGCAGCTGCTGCCAAGTGATTTCGAGGGGTAGTGGTTTTGGAGGAGGTTACTGCAAC  
CAGCAGCTTTCAGAGACTGCGACTGGCTTTCAGTTTCAGAACGGCAATCTGCTGAGCCAT  
CCATTTCTCTGAACAATCATCTGCAGATGCAGTAG

Protein

> **ONAC122**

MPSSGGAMPALPPGFRFHPTDEELIVHYLMNQAASVKCPVPIIAEVNIYKCNPWDLPGKA  
LFGENEWYFFSPRDRKYPNGARPNRAAGSGYWKATGTDKSI LSTPTSDNIGVKKALVFYK  
GKPPKGVKTDWIMHEYRLTGTSANSTTTTKQRRASSMTMRLDDWVLCRIHKKSNDFNSSD  
QHDQEPEESTVEQLEDIHDNNSSEQPPAPADMNNQQSDFQPMTAMSMKSCSLDILLNTI  
DCAALSQFLLDGSSDAIAEPPAPPSPLIYTPHPNYQTLNYNINSNSSMPHAFESRLDHH  
DGYVNNYNVNGLRRKRMMACSATSFDDGSSSNDVFHAVVKKPQLLPSSDSRSGSGGGGYCN  
QQLSETATGFQFQNGNLLSHPFPLNNHLQMQ\*

Gene Structure

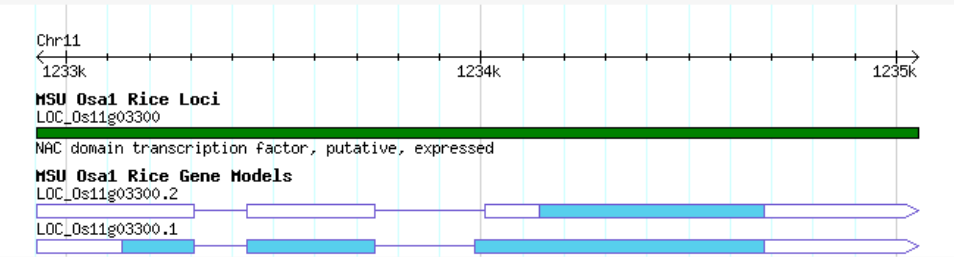

**LOC\_Os11g03310 (ONAC123) sequence information**

**Genomic sequence length:** 5337 nucleotides

**CDS length:** 867 nucleotides



**Protein length:** 288 amino acids

**Putative Function:** no apical meristem protein, putative, expressed

#### Genomic Sequence

##### > ONAC123

```
GGTGACGATGGCAATTAGTATTACAAATAGACAAACTATATAGACCCGCAAGTCTTTTTT
TTTTGTTTTTAAGGAATGAACTGCACATTAAGCTCAGTACAAATTAATCGGAGAAAATTA
GACAAGCTAGCAAGCTGGATTAATCCATGGATAAGAAAAGGAAAGAGAACACAATTCTAT
TACCATGAGAAGATGAGAACAGTGATTTCGTATCTCAGATACATGAAAATTAAGTTTCTT
TTTAAAAGGATAGAAGCTACTACTACACATGAAAATGAAGGTCAATTAAGCGGCCTCCTA
CCGTACCACACAACTACACAAGCCTTCTGGACAGTTAGTTTCTTTTGGGTCGCGTTCCTG
GCTAGCCGTAGCTGTCAACCACCAGCATTAGCTGGCAAAACAGATTGATGTTATACAAGAA
GAATATAATAACATTAGTTAATTAGACTAACTAGATGTGGATCTATGTAAGCACACAT
GTATAAATCCGATTAATTTGACGGGCACAACATACCACTTATTTTAATTTGTTCTAACAC
TATTGAAACCGAGTGAACGGAGATGACTTTCTCTTCCTTGCTAACAAAGATTTTGTGGG
CTTGTTAACGCGGCTCCCTAAAAAAACCAGGGAAAAAGTCTCGAAGCACTATATATAGCTA
GCTAGCTCCTTTATCTCCTTCATTTCTGTTCCATTTCCCATCCATCATATCGCCTCGTCG
ATCGTCTCCACCTTTCTTGCTTGTGCCACCAGCTTTATACTCTCCTTCTCCTCTAGCCAC
TCCGATTCCCTCAGAGTAGATACAATAGCAGACTATAAGCCACCTATAAACATATATCGAG
AAGATAAAAGAGGAGAGAGGAACAACAAGCTACAATTTATAGTTAGCTACAACACAGAAT
ATAAACATAATGTATGTATGACATGGGGTGCCATTTATTAATAGTGTAGTATATGTTTA
TATGTATTAAATTGGCTATAAATGATTTGAAGCTAGTATATAGCTATACTATTAAGCTTG
CTCTTAATATAATTTATGCTTTTATTGTTCCCTCTTTCTTCAGTCTAGTGATCACTAATGC
TAGCTAGTGCTTAATTTCCCTCAATCTAGCTTCAGCATGGTGGAGCCTGTGAAATCGGAGC
TTGGCAGCCTGTTCTTACCTCCAGGCTTCAGGTTTCATCCGACGGACGCTGAAGTTATCT
TGAAGTATCTCCTTGAGAAGTTCATCAACCCTAGCTTCACCTCCTTGCCCATCCACGAGG
TCGACCTCAACAAGTGCGAGCCATGGGATCTCCCAAGTAAGTCAAATTTGTTTTCTTTTC
TTTTCTTTCTTCCAAAAGCTTCTAGATGTAGATGCACAAATAATTAATTAGTTATTGATC
GATGTTAATTTCTCCTATCTCATGCTATACAAATATTGATGAATTGAAATTACAGCGGCG
AGGATGGGGAACAATGAATGGTACTTCAGCCGCAAGGACATGAAATACCCGACGGGGATG
CGAACCAACCGAGCCACCAAAGAGGGATATTGGAAGGCCACCGCAAGGACAGGGAGATC
TTCAAGCCTGCCATTTACGAAGGAAGCAGCAAGAACAATAAGCAGCTTGTGCGGATGAAG
AAGACGCTGGTGTCTACATGGGGAGGGCTCCAAAGGGCACCAGGACCAACTGGGTGATG
CACGAGTTCCGTCCCCACGCCAACCTCCACAACCACTACCCAAACCTTCGTCTCAATCCC
AACGAATGGGTTGTGTGCAAGGTGTTCCACAAGAAGCAGGGAGACGAAGCCATCAACAAC
CAGCAGCAGCAGCCTGCCGTTGATCAAGCCGACGACGACGACATCTTTCAGCTAGATGAC
ATCTTCGCCGACCCCAGCATCTACGACTTCAGCAACTCATCTGCCAACATCTTGTGCGCG
CCGCCCAACAACAATGCGGTTTCTTCCCTCCGTTTCTGCAGGTACGACGATGACTAGTACG
ACTACCGCCAGTAGCTTCCAGCATCAGCCAACTGCTATAGTGCGCCTCTGCAGCAGCAC
GTCTCCTCTTGAATAATACGCCTGGAGCTGGAGGAGCCCATGGAATTGGAAGCAGCTAC
TACAACTTGCAGCAGCAGCAGCAGCAGGCAGCAATGGTGAAAGACCTAGAAGATATCATT
GCTGTCCCGGATTATGGTACGCTACTGCCGAGCAGCAACAAGGGTTCATCAATAAGGTCG
GCGACGGCTGGAGTTTCGCAGCAGAATCCCCTTGGCGTGCCGAGTACAAGATAGAGAAT
TATGGGGATCATTACATATCACGAGAGTAATCACATATACATATATGTACTGCATGCTGC
TGCTGTGTTTCGAGAGTTTTTTGTGCTCGGCTACTGCATACTGAGTTTCTGAACATGAAC
```

ATGGACATGGATGGAGTACTTTATTTGCATGGATGGTCATGGAGATTTAGGGATATATAT  
GTTTCAGTTTAATTTCTGTTGATTGCTTCATTGTTTAGTTTCGTAGGTAGCTAGAGAGATCA  
TTCTACTCCATTTGTTTAAATTAATTGGGTGCCCTTTTGTATATACCAAGGTCGTGTTTTT  
TTTATGTTTTTTCTGTAAATTAATTGTTGGTGGTGCTGAACTGATGATTGATTTTTTGG  
GACTGCCATAGCCTTTGGATATACTTGTGTATGAGATTTCTTCTGTAGTACTTCTTTTA  
ATTATATTGTGGTCATATCTTTCTTTTGTGCACATGTTGCACCTTGCACCATATTATACG  
ACTGATGGCAATCAAAAGAAAGTGGTGCAAATTAAGGAAAACAAGTGAGAGGGATATACAG  
TACAAGAATCTATCAGGTGCAAAGCACAAATCAATTTATTACTCTTTCCTTTTTCTAATC  
TTGTCATGCATGTAAGTTAGGAGAGGGCTTGAGGTAAACAAACACAGCTAGCGCAGAGCA  
AGCACTACACAGCTTGGTGCAAGCTAGCTAATTAAGTGCTGTTAGATCGAGATAATCACG  
TGCAGCCAGGCCGTATATGCAAGTTAATTAGTTGGACGGCGCATGCAAGCCTTGTTGGTG  
ATGTCATATTGTCATGTGATATACCCCAAGTAGCTACTGTAGTTGGCTTCGTAAAAATTA  
ACCACGAAAGGCGCGTAGTATCTAGTACTGGAGTAATACCTAGCTAGTCTCGTAGCTAAG  
AAAATATATATACAAGAGCCGCCAGCTGCTCGTAGCCAATGACAGCATGTACTTTTGTA  
TCTAGCTGCTCTGAATTTATTGTTCTGAAGAATTCTTGGATCTTGGCAGCTCTGAAGAAT  
TAGATAGCATGATGTGCTTGCTTACTCAGCTTTGACATTTTGTTCCTTTTAGGAATTC  
GGTATATCGGCATCCTCCGATAGAAACATCGAAACCAAAAGATTAAACCCTGCCTTGATC  
AGTTCTTTCTAGCTTGACAGTGTGAGAGTTGCAGGTCATGACCCCCAAGAACCAACAATGA  
AACAAACACCTTATGTGGCAACCTATCTATGGGCCAACATGACGTACGTCGTTGTTGCCG  
ACAATTGGAAATCTCAAGCGTTGCTATGCTAGCTTAACCAAAATTTTACTTTTCAGCAAAA  
GGTCGGTTTCAGCTAGCTAAAGAATAGTAATAGACTGTAATGGACAGTAGTAGCTAGGAG  
CTCTCATTAATGCCGTGTGTATTTATCATACTGAATATAGTATTTCTAGCATTTTGTATA  
ATTTGGTTTGGCTAGCTGCAGTGTAGATCCGGTTGGATAAGAGATCGGATTTTACCTATT  
TTCTTAAAGGAAAAAATTTCTGAACAAGTGGCCGGTAGCATATGTTGAGGATGTTGGTCA  
AGAGAAAAAGAACAGGAGACGGTTTCGTCAGAGCACGCAAATTAAGGAGAATTGCTTTT  
AGGTTGCATTTTTTTAAAAAATACTATTTAGGTTGCAATGTTGCATCGCCTTCATCT  
CATCAGTGCTTCATGCATGTGGTACGGATGACGTAATGCTTACTGTACGATCCGTAGCAT  
ACATTTCAATCTTACTGACATGTTATTTGACAATGATTGGCATGATTAGATATATAGATA  
AGCCCAAAATAAATAAGTTGATTCTCTCAACTTGCTTAATCACGTCTCCCTATTGGAGA  
CAGCGTTTTGTAAATCCTTATAACCCCTTCAAACCATCGTGTGTCCGGTCTACTACCTCT  
ACGGCTCTAGCTAGCAACAACATCTAATCTCCCATGGATTGAATTTGATAATTAATTGAA  
GCAATCACCAATAAACAGCTAGCTAAAGCATGATGATTAAGTCACACTCACACATGCATG  
TTAGAAAGGTCGGTTATAATTGGTGCTTCTGCACTACTCCTAGTTTAAAGTGCCGGATTAG  
GATTTTTTTTTTTTGAGCAAGGGCACATGGTCCTGCATTTCCATTAAAGAAATGTCATAG  
GATTACAGTGCCGATTATGATAGAATAACAATTCATGCAATGCCTAAAAAGTGATGACG  
ATCATATCAGATAAGAAGGGCCCGGTCCCTGAATCGTCCAAAATCAGGTTGGCAAAGTCA  
TGATGCCTTAAGCATATGATAGATTAATTATCTGTGCATGCATGCTTACGAAAAGCTAAT  
TAAAAAATGTATGGGGCTTACTAGGATCTTCTTCGTGTTGCACCACGCAGCGACGGATCT  
AGAAAAATTGATTCGTTGGAGTCTATCTATCGGTGTCATAATATGCTAATTATACTTAGAT  
TATAGTGTTATGATATATAGATAAGCAGTTTTACAATAGTTTTTCCATAAAAATCGTCGGA  
CACCGACGCTTACACGTACTGTAGATCCGCCCCCTACCACCACGTCACAAGTTTATCCAT  
GACATCGACGTAAGGTTGATTCCGTTTCTAGAAGTAACTAACAGTAATTATATATGACAC  
TAGCCATTAATAATGTTTGCTTAGCGTAATTAACCATTGTTAACTGCCTTACTCTGATCC  
AGAGTCTAGCTTAGAACAAGAGGACTCTGGCCGGTGTTTTAGTGTGGACCCCGTTTTTAT  
AACAGGAATCAATCGTGTAACAGTACCATTTCCCTGAATCAAGTAGTCTGGTACACACG

AGTTTATAGCTGAAATACCAAATACACATACACGAAAGTCTAGTGCGAATTATTACATCA  
 AAAGCCCGCAGGTGTAGTCTTAGATCATCGAACCGAGCGGTCCGGAATACATTCCAAAAG  
 CAGAAATAGATAAGGCAGCGGAGTTTAGGCAGCGGCACGCTATTGCCACAGGCATCGACC  
 GTAACCTAAGACCTACTAAGCGCCATCGTCTTCATCACCTCTTGGTAATAGGCATAG

CDS

> **ONAC123**

ATGGGGAACAATGAATGGTACTTCAGCCGCAAGGACATGAAATACCCGACGGGGATGCGA  
 ACCAACCGAGCCACCAAAGAGGGATATTGGAAGGCCACCGCAAGGACAGGGAGATCTTC  
 AAGCCTGCCATTTACGAAGGAAGCAGCAAGAACAATAAGCAGCTTGTCTGGGATGAAGAAG  
 ACGCTGGTGTCTACATGGGGAGGGCTCCAAAGGGCACCAGGACCAACTGGGTGATGCAC  
 GAGTTCCGTCCCCACGCCAACCTCCACAACCACTACCCAAACCTTCGTCTCAATCCCAAC  
 GAATGGGTTGTGTGCAAGGTGTTCCACAAGAAGCAGGGAGACGAAGCCATCAACAACCAG  
 CAGCAGCAGCCTGCCGTTGATCAAGCCGACGACGACGACATCTTTCAGCTAGATGACATC  
 TTCGCCGACCCCAGCATCTACGACTTCAGCAACTCATCTGCCAACATCTTGTCTGGCGCCG  
 CCCAACAACAATGCGGTTTATTCTCCGTTTCTGCAGGTACGACGATGACTAGTACGACT  
 ACCGCCAGTAGCTTCCAGCATCAGCCAACTGCTATAGTGCGCCTCTGCAGCAGCACGTC  
 TCCTCTTGAATAATACGCTGGAGCTGGAGGAGCCCATGGAATTGGAAGCAGCTACTAC  
 AACTTGACGACGAGCAGCAGCAGGAGCAATGGTGAAAGACCTAGAAGATATCATTGCT  
 GTCCCGGATTATGGTACGCTACTGCCGAGCAGCAACAAGGGTTCATCAATAAGGTCGGCG  
 ACGGCTGGAGTTTCGACGAGAATCCCCTTGGCGTGCCGAGTACAAGATAGAGAATTAT  
 GGGGATCATTACATATCACGAGAGTAA

Protein

> **ONAC123**

MGNNWFYFSRKDMKYPTGMRTNRTKEGYWKATGKDREIFKPAIYEGSSKNNKQLVGMKK  
 TLVFMGRAPKGTTRTNWVMHEFRPHANLHNHYPNLRNPNNEWVCKVFHKKQGDEAINNQ  
 QQQPAVDQADDDIFQLDDIFADPSIYDFSNSANILSAPPNNNAVHSSVSAGTTMTSTT  
 TASSFQHQPNCSAPLQQHVSSWNTPGAGGAHGIGSSYYNLQQQQQAAMVKDLEDIIA  
 VPDYGTLLPSSNKGSSIRSATAGVSQQNPLGVVPQYKIENYGDHYISRE\*

**Gene Structure**

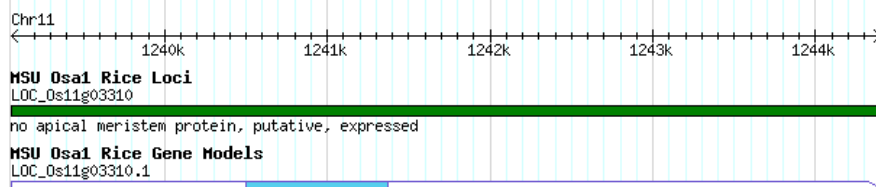

**LOC\_Os11g04470 (ONAC124) sequence information**

**Genomic sequence length:** 1429 nucleotides

**CDS length:** 1077 nucleotides

**Protein length:** 358 amino acids

**Putative Function:** hypothetical protein

#### Genomic Sequence

##### > ONAC124

ATGGCGAAGAAGATGACAAGAAGCAGAAGGGCCCGACGTGACGGTGCCCTCGGGATAC  
 TTCTTCGTGCCGAAGCCGGAGCAGCTCATCCGCGACTACCTCAACCACTGGATCACCGGC  
 CGGCCGAGCGAGGAGCTCCGGGACATTGTCCGGGAAGCCGACGTCTACGGCTCCGACCCG  
 GCGACGCTGACGGAGGCGCACAGTGCGTACGGCCACGACGGCAAGTCGTGGTACTTCCTC  
 ACCGTCGCCAAGTGGAAGGGCGGCAGGGGCGGCCAGTTAGCAAACGATGAGCGAACAA  
 ACGATAATAAATAATAGATCAATCACAGAAGACACGACATTTAACGTGAAAAACCCTTCT  
 AAAATAGGAGAGAAAAAACACGGGCGCCAGCCAGCAAAATATCTTCACTATATCTAGGG  
 TGAGGTTACAACGCCACACGACGGCTTACAAGAGGTATATATACGGTGGAACCCTAAAAG  
 GGATGACGATCCGTTTCGCGGGGGCTCCGCCTCCGCACCCCCGAGCGTTCCCCGCTACGC  
 TCCGGCCCCAAGCCTCCCGGCGACGGGCCCTCCACTCCACTACGGCGGAAGTTGGCCTTTAT  
 TAAGTACAAATGAATTTGGATCACAACCTCAACAGCGCGGCGGCTTCGAGGGCGGCGGCAC  
 GTGGCACAACCTCGCAGCGCCGCCGCGTCATCGAGGGCTACGGCGACCGTCAGGCGTTCGA  
 GTACCGCGCCCCCGGAACAAGAAGACGGACTGGCTCATGGAGGAGATCGCCAGCAACCT  
 GCCGGCGGCGATCACCGACGAGGGCATCATGGTCATCTGTAAGGTCTACCTCTCGCCGAG  
 GGCCAAGGAGGCGACGGCCAACGAGGAGGAACGCCAAGAAACCAACGTGGTTCCCGGGCC  
 CAAGAGGCTCCGAGAGGCGGAAGCCACCGGCTACGACGCGCCGGCGCCGACAGCCCGA  
 CGTCGGATACTCGTACTCCGGCGGCGGCGAGACGTCTCAAGCGACCGCCTCGATGGACTA  
 CTGCTGCTCGACGACGACACACGCGGACGACACGGCCAATGCCGCCTACTACCACGG  
 CGACGCTGATGCCATCAAGCCAGATGCTTACGACGCGGCGACTACGGCATCGGCTTCAA  
 CGCAGACGGGGAGCTGGTTCTCTGCGGCAACGGCCACGGTGGCATCGGGACGCAGGGACA  
 GACGCCATTGGCAATGCAGAACACCAACGGGGAGATGACCTTGTTCTACCAATGAACGG  
 CTATGGTGTTGGCTTCAATGAGGAGGTGAGACAAGAACCACAAGTAGAAGGTGAGGTGGA  
 GATGGATAATTTCTTCAACGATTTGTTTCGTCGACTTCGACGGCGCCGGTGATCTCAATCC  
 CAATCCTAACGGGGGTGGAGACAGCCACGGCCACATACTATGTGAATGA

#### CDS

##### > ONAC124

ATGGCGAAGAAGATGACAAGAAGCAGAAGGGCCCGACGTGACGGTGCCCTCGGGATAC  
 TTCTTCGTGCCGAAGCCGGAGCAGCTCATCCGCGACTACCTCAACCACTGGATCACCGGC  
 CGGCCGAGCGAGGAGCTCCGGGACATTGTCCGGGAAGCCGACGTCTACGGCTCCGACCCG  
 GCGACGCTGACGGAGGCGCACAGTGCGTACGGCCACGACGGCAAGTCGTGGAGAGAAAAA  
 ACCACGGGCGCCAGCCAGCAAAATATCTTCACTATATCTAGGCGCGGCGGCTTCGAGGGC  
 GGCGGCACGTGGCACAACCTCGCAGCGCCCGCGTCATCGAGGGCTACGGCGACCGTCAG  
 GCGTTTCGAGTACCGCGCCCCCGGAACAAGAAGACGGACTGGCTCATGGAGGAGATCGCC  
 AGCAACCTGCCGGCGGCGATCACCGACGAGGGCATCATGGTCATCTGTAAGGTCTACCTC  
 TCGCCGAGGGCCAAGGAGGCGACGGCCAACGAGGAGGAACGCCAAGAAACCAACGTGGTT  
 CCCGGGCCCAAGAGGCTCCGAGAGGCGGAAGCCACCGGCTACGACGCGCCGGCGCCGCCA  
 CAGCCCGACGTGCGATACTCGTACTCCGGCGGCGGCGAGACGTCTCAAGCGACCGCCTCG  
 ATGGACTACTGCTGCTCGACGACGACACACGCGGACGACACGGCCAATGCCGCCTAC

TACCACGGCGACGCTGATGCCATCAAGCCAGATGCTTACGACGGCGGCGACTACGGCATC  
 GGCTTCAACGCAGACGGGGAGCTGGTTCTCTGCGGCAACGGCCACGGTGGCATCGGGACG  
 CAGGGACAGACGCCATTGGCAATGCAGAACACCAACGGGGAGATGACCTTGTCTCACCA  
 ATGAACGGCTATGGTGTGGCTTCAATGAGGAGGTGAGACAAGAACCACAAGTAGAAGGT  
 GAGGTGGAGATGGATAATTTCTTCAACGATTTGTTTCGTCGACTTCGACGGCGCCGGTGAT  
 CTCAATCCCAATCCTAACGGGGGTGGAGACAGCCACGGCCACATACTATGTGAATGA

Protein

#### > ONAC124

MAEEDDKKQKGPDTVPSGYFFVPKPEQLIRDYLNHWITGRPSEELRDIVREADVYGSDP  
 ATLTEAHSAYGHDGKSWREKTTGASQQNIFTISRRGGFEGGGTWHNSQRRRVIEGYGDRQ  
 AFEYRAPGNKKTDWLMEEIASNLPAAITDEGIMVICKVYLSPRAKEATANEEERQETNVV  
 PGPKRLREAEATGYDAPAPPQPDVGYSYSGGGETSQATASMDYCCSTTTHTADDTANAAY  
 YHGDADAIKPDAYDGGDYGIGFNADGELVLCGNHGGIGTQGGTPLAMQNTNGEMTLFSP  
 MNGYGVGFNEEVRQEPQVEGEVEMDNFFNDLFVDFDAGDLNPNPNNGGDSHGHILCE\*

#### Gene Structure

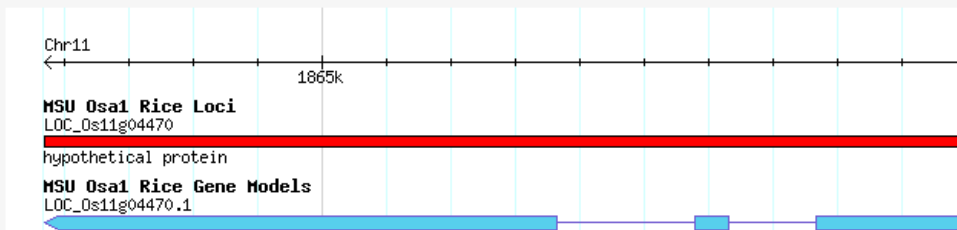

#### LOC\_Os11g04960 (ONAC125) sequence information

**Genomic sequence length:** 1852 nucleotides

**CDS length:** 1356 nucleotides

**Protein length:** 451 amino acids

**Putative Function:** no apical meristem protein, putative

Genomic Sequence

#### > ONAC125

ATGAACCCGACAATAGAAAAACGGCGGCAGCGCGGCGATGGATCGGCGGCGGCGGCAGCG  
 GCGGAGGGAAGTGCGATCTGGAAGAGTGAGCTGGTGCCGAGCTACAGCTACCTCCGGGC  
 TACCACTTCGTACCAACGGACGAGGAGCTCGTGGACTTCTACCTCCGCGGCAAGATCGAG  
 GGACGCGACCCGCTCGCCACTTCATCAGTGAGGAGAATATCATGCGTTATGATCCCCAA  
 AAGCTGATTGGTAATTTAATCTTCTTTTAGCTAATTGATCGCTTGATTATCCATGAAAA  
 AAAAGGTTTAATTATGTATGTCTATGAACCAAATTGGTTTGTGATAACACAATATGAATG  
 CATTAGAGAAAATACAAGGGCTATGGGGAAGACAGGTGGTACTTTTTTCATGGTGAGGGAGC  
 CGTCGAAGACGAAGAAGAAGGACGAGCCGAACAGGAAGGTGGTGGTGGATGGGGTGAAG  
 AGGGAAGCTGGAGCGGACGGGGAGCGTGGTGAGATTACAGCACCAAGGAGACGAACC  
 GGAAGGCTATCATTGGCAGCAAGAGGGTTCTCACTTATAAATCTGCTCGTCCGCTGAGA  
 ACGACATGTGGAGCATGCATGAGTATGTCTTGGCAGGCAAATCCCAGGTACTTTGATAAT

CCAACATCTTTTGAAGCATTTATATATTTTTTTTTTAAAAAAGATGATGGGTCAAAGTT  
 TGTGTGTGAATAGTACCCCTCTCAATTCATATGACAAGTTTTTCATATGACAAGTCGTTTT  
 ACTTTTTAAGTTTGACTAAAATTTATATGAATACAAAACAAATATACCATCAAAATATATT  
 CAACATAGTATATTAGATATAGTGAGACTAATTTGGTGATGTACAGATGTTGCTATATTT  
 TACTATGATCTTAGTTAACTTGAAGAAATTTGATATAATATGAATCAAAGTGAGTATCT  
 GATAAAAAATAAAAGTGAATGAAGGGAGTACTACATGTTGGTGTATGATCGATCAATGTA  
 CTTGCAGATGGGTGAGTATGTATTGTGCGCGATACAGCTGAAGCAGACCTACGAGAGAGA  
 AGAGAAGGCCCGGAGGAGCAGAAGAATGACAACAAACGCAATAAAAAGGCCGCAAGGAG  
 GAAGAACATGCAGCAGCAGCCTACTGCTTGCCAGGCACAAGACGAGCAGCAGGAAACAGC  
 ACCAACACCTGGAGAAGAAACCATTGTGGATCCTGACCAGTTCATGGATATTGCCCATTC  
 CATGCATATGATGTTTGGAGGAGTAGATCAAGATGCACCACCATTTCATGCCAAGCTTAAT  
 TGCTCCTTGCAACAACGATGATGGCATGCTGCAACTTCAACCACTCCAATTGCAGAACCC  
 AAACCTGCAATGCTGTACAGTAACCAGCTGGAACCATCGTACATTGGTGATCAGTCGAT  
 GTTACCCCATGCTGCTGCGATAGAACTGTATTTCTTGTGCTCAGCTACAATTTTACCA  
 GCAACAGCAAGCAGAGGATGGCAGTGTGTCATTTGGAGAGGCTGATCTATACCAACAACA  
 TGATAGGGCATTGGGAAATACTGGTGTATACCCTGACAATGTTTGGGTGGATGGTAACAT  
 GGCAGATTATGCTCAGCGTCAGATTTACAATGATCAAGATAATGGTGGTGTATTAATGCA  
 AGGGCCGAGGATAGCGCAACTTTCCCTGACAACTTCCTGATGCTGGACGAAATGGCGGC  
 AGGTAGCGATGATGCGTCAGGCTTTGATTATGAGGTTGATCAATCCATGGCAGTCGTCCC  
 ACATGTTGCTGATCAGACCGTCGATGATATTATGTCGTCAGTCTTAATTGA

CDS

> **ONAC125**

ATGAACCCGACAATAGAAAACGGCGGCAGCGGCGGCGATGGATCGGCGGCGGCGGCAGCG  
 GCGGAGGGAAGTGCGATCTGGAAGAGTGAGCTGGTGCCGAGCTACAGCTACCTCCGGGC  
 TACCACTTCGTACCAACGGACGAGGAGCTCGTGGACTTCTACCTCCGCGGCAAGATCGAG  
 GGACGCGACCCGCCCTCGCCACTTCATCAGTGAGGAGAATATCATGCGTTATGATCCCCAA  
 AAGCTGATTGAGAAAATACAAGGGCTATGGGGAAGACAGGTGGTACTTTTTTCATGGTGAGG  
 GAGCCGTGCAAGACGAAGAAGAAGGACGAGCCGAACAGGAAGGTGGTGGTGGATGGGGTG  
 GAAGAGGGAAGCTGGAGCGCGACGGGGAGCGTGGTGCAGATTCACAGCACCAGGAGACG  
 AACCGGAAGGCTATCATTGGCAGCAAGAGGGTTCTCACTTATAAATCTGCTCGTTCCGCT  
 GAGAACGACATGTGGAGCATGCATGAGTATGTCTTGGCAGGCAAATCCCAGATGGGTCAG  
 TATGTATTGTGCGCGATACAGCTGAAGCAGACCTACGAGAGAGAAGAGAAGGCCCGGGAG  
 GAGCAGAAGAATGACAACAAACGCAATAAAAAGGCCGCAAGGAGGAAGAACATGCAGCAG  
 CAGCCTACTGCTTGCCAGGCACAAGACGAGCAGCAGGAAACAGCACCAACACCTGGAGAA  
 GAAACCATTGTGGATCCTGACCAGTTCATGGATATTGCCCATTCATGCATATGATGTTT  
 GGAGGAGTAGATCAAGATGCACCACCATTTCATGCCAAGCTTAATTGCTCCTTGCAACAAC  
 GATGATGGCATGCTGCAACTTCAACCACTCCAATTGCAGAACCCAAACCCTGCAATGCTG  
 TACAGTAACCAGCTGGAACCATCGTACATTGGTGATCAGTCGATGTTACCCCATGCTGC  
 TGCGATAGAACTGTATTTCTTGTGCTCAGCTACAATTTTACCAGCAACAGCAAGCAGAG  
 GATGGCAGTGTGTCATTTGGAGAGGCTGATCTATACCAACAACATGATAGGGCATTGGGA  
 AATACTGGTGTATACCCTGACAATGTTTGGGTGGATGGTAACATGGCAGATTATGCTCAG  
 CGTCAGATTTACAATGATCAAGATAATGGTGGTGTATTAATGCAAGGGCCGAGGATAGC  
 GCAACTTTCCCTGACAACTTCCTGATGCTGGACGAAATGGCGGCAGGTAGCGATGATGCG  
 TCAGGCTTTGATTATGAGGTTGATCAATCCATGGCAGTCGTCCCACATGTTGCTGATCAG

ACCGTCGATGATATTATGTCGTCAGCTGCTTAATTGA

Protein

> **ONAC125**

MNPTIENGSGDGSAAAAAEGSAIWKSELVPQLQLPPGYHFVPTDEELVDFYLRGKIE  
GRDPPRHFI SEENIMRYDPQKLEKYKGYGEDRWYFFMVREPSKTKKKDEPNRKVVVDGV  
EEGWSATGSVVQIHSTKETNRKAIIGSKRVLTYKSARSAENDMWSMHEYVLAKSQMGQ  
YVLCALQLKQTYEREEKAREEQKNDNKRNKKAARRKNMQQQPTACQAQDEQQETAPTPGE  
ETIVDPDQFMDIAHSMHMMFGGVDQDAPPFMPSLIAPCNDDGMLQLQLPLQLQNPAMP  
YSNQLPSYIGDQSMFTPCCCDRNCISCRQLQFYQQQQAEDGSVAFGEADLYQQHDRALG  
NTGVYPDNVWVDGNMADYAQRQIYNDQDNGGVLMMQGPEDSATFPDNFLMLDEMAAGSDDA  
SGFDYEVDQSMMAVVPHVADQTVDDIMSSLLN\*

**Gene Structure**

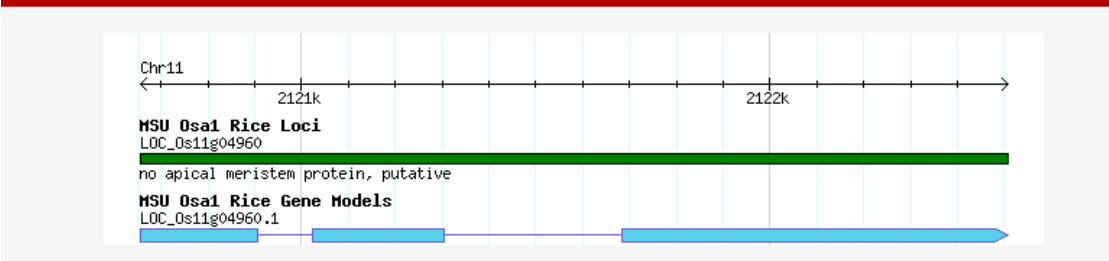

**LOC\_Os11g07700 (ONAC126) sequence information**

**Genomic sequence length:** 804 nucleotides

**CDS length:** 804 nucleotides

**Protein length:** 267 amino acids

**Putative Function:** NAM, putative

Genomic Sequence

> **ONAC126**

ATGGCTTCCACGTCGAGGAAACGTTTCGGCGCGTAGCCTGCAAGAAGATGAGCAGACCTCA  
TCGGCGGCAGAGGCGCCGGCGCGGTGCGAGAGGACGAGGAGCGGTTGCGGTGGCGGGC  
ATGGAGGCGTGAGGTTTCGGGTTCTCGAGATTCTCCTGGTTTCCCGCGTTCAAGTTCGAC  
CCCACCGACGCCGACATCGTCGCCTCCTACCTCCTCCCGCGCGCGCTCTACGGCCGCGGC  
CACGCCGCCGTTATCCAGGACGACGTGTCGAGGTGCGAGCCGTGGACGCTGATGCGGGAG  
CACGGCCACGCCACCAGCGCGCACGCCTTCTTCGTCCACGACCACGAGAGCGTCGGCGGC  
GGCGGCGCGCGGCAGGCGCAAGGTGCAGCGCGCAGTCAAGAACGGCGGCGGCGGTGTGG  
CGGATCCAGAAGGGCGAGGTGGCGATCCTCACCATCGTCCGCGGCGGCGGCGGAGGCGGA  
GGCGAGCTCGACGTGGTGTACAAGCGGCGCAACCTGAGCTTCCACCGCCGCGGCGAGAGC  
TCCTCCTCCGGATGGGTGTCACGAGTACGAGATCACCTCGCCGCCGCTCCCCGCCACC  
GTGCTCTCCCGGATCAGGGCCACCCCCAGGGCCAAGGACAAGAAGCTGTGCATCAAGGAG  
GAGCCCTCCTGCTCCACCTCCGCCGCCGCGAGCGCTCTGGCCCTAACCCAGACCACACC  
GCCGCCGGCGCCGGTGACAGCGCCACTGCCAACCACAACAATAACGTCGCGGCGGACA  
ACAACCTATGGCAGCGGCGGTGTAG

CDS

> **ONAC126**

ATGGCTTCCACGTCGAGGAAACGTTTCGGCGCGTAGCCTGCAAGAAGATGAGCAGACCTCA  
TCGGCGGCAGAGGCGCCGGCGGCGGTGCGAGAGGACGAGGAGCGGGTTGCGGTGGCGGGC  
ATGGAGGCGTGGAGGTTTCGGGTTCTCGAGATTCTCCTGGTTTCCCGCGTTCAAGTTCGAC  
CCCACCGACGCCGACATCGTCGCCTCCTACCTCCTCCCGCGCGCGCTCTACGGCCGCGGC  
CACGCCGCCGTTATCCAGGACGACGTGTCGAGGTGCGAGCCGTGGACGCTGATGCGGGAG  
CACGGCCACGCCACCAGCGCGCACGCCTTCTTCGTCCACGACCACGAGAGCGTCGCGCGC  
GGCGGCGGCGGCGGAGGCGCAAGGTGCGAGCGCGCAGTCAAGAACGGCGGCGGCGTGTGG  
CGGATCCAGAAGGGCGAGGTGGCGATCCTCACCATCGTCCGCGGCGGCGGCGGAGGCGGA  
GGCGAGCTCGACGTGGTGTAACAAGCGGCGCAACCTGAGCTTCCACCGCCGCGGCGAGAGC  
TCCTCCTCCGGATGGGTCATGCACGAGTACGAGATCACCTCGCCGCCGCTCCCCGCCACC  
GTGCTCTCCCGGATCAGGGCCACCCCCAGGGCCAAGGACAAGAAGCTGTGCATCAAGGAG  
GAGCCCTCCTGCTCCACCTCCGCCCGGCGAGCGCTCTGGCCCTAACCCAGACCACACC  
GCCGCCGGCGCCGGTGACAGCGCCACTGCCAACCACAACAATAACGTCGCGGCGGACA  
ACAACATATGGCAGCGGCGGTGTAG

Protein

> **ONAC126**

MASTRKRARSRLQEDEQTSSAAEAPAAVREDEERVAVAGMEAWRFGFSRFSWFPAFKFD  
PTDADIVASYLLPRALYGRGHAIVIQDDVSRCEPWTLMREHGHATSAHAFFVHDHESVGG  
GGGGRRKVKQRAVKNNGGVWRIQKGEVAILTIVRGGGGGGGELDVVYKRRNLSFHRRGES  
SSSGWVMHEYEITSPPLPATVLSRIRATPRAKDKKLCIKEEPS CSTSAAGERSGPNPDHT  
AAGAGDSATANHNNTTSAATTTMAAAV\*

Gene Structure

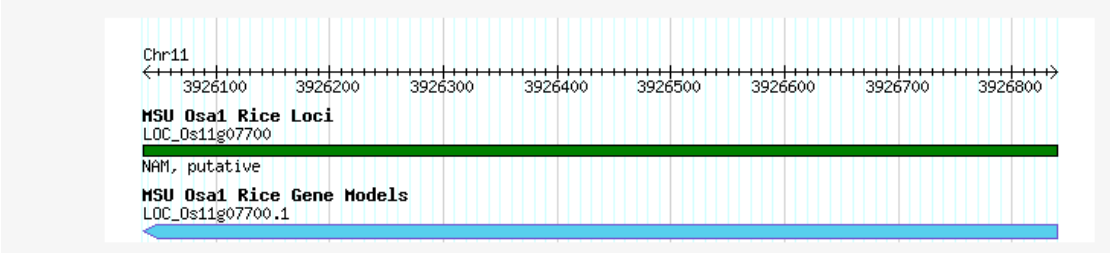

**LOC\_Os11g31340 (ONAC127) sequence information**

**Genomic sequence length:** 2526 nucleotides

**CDS length:** 834 nucleotides

**Protein length:** 277 amino acids

**Putative Function:** no apical meristem protein, putative, expressed

Genomic Sequence

> **ONAC127**

ATCACAAATAGCATCATTCAATCTTTAATTCATTTGAGAGTTGAGAGTGAGCGGAATATAT



TTGTATTCTACGATTGAGGAGAATGGCCAGCCCTGGAGTTTGCATCAACTTGGTGAATGG  
 TACATCGACGCGCCTCCCCACCAATGCTGATCTAGTAGTCCACTACCTGCACCGTCGCGC  
 CATTGAGGAACCGGTGCCCTGTGACTTCATCACCAACGTCGACATTCTCCAGCACAAACC  
 CTGGGACATCGTCCCTGGTAAATATTTTTTTGACCCACACAGGCTTACTCCCATTAGATA  
 TATTAATCCAAAACCTTTGCCAGCTTCTTCAGTTAATTTGATCAATCTGTAGTATAACCTC  
 AATAGATAGTTTGCAGTTGTTTTGATAGTTAATTTATTGTCTGCTGGGTTGATGATGATG  
 GAGCAGCGGAGGAGAAGACAAATGGGAAGTACTTCTTCATCCATGAGGAGAACGAACGCC  
 TTGGCAACCACCACAGCAACCGTGCTGCTGGTGATGGGTTCTGGAGGCCAGTAGGCTCAG  
 AGGTGCCGATATATCACAAACGTAGTGGTGGCGCTGATGAAGCACTGGTGGGGATGAAGC  
 GCACCTTGGTATTCCACTACGGGAATTCTTCGTCGCGCAAAGCGCACCGAATGGGTGATGC  
 AGGAGTTCCGACTTGCTGGTGCTACCCCTTATACCTTGCCCTGTGACGAGGCCAGCCACCG  
 GTGATGGCTCCATGCTTCCCTGCCACCGCACAGGAACGACCATCGCCACGGTAAGACACT  
 ACACATCCGAACATCACCGTGCTATATATTGGATATAACATAGAATCGATCTACTTTTA  
 TAATCTAATTGGTTAAGTATTTACATGCAAGCATAGAAGTGTGTCATTCAACTTGGGGAA  
 TATGGACATGATGAATTACAAACTTATAATTATAAGAACAAATATTTTTCTATGTTGACGT  
 TGATGGTGCAACAAGGTCTAGGATGGACCTAGCTAGTGGTGATTCAAATTTTGTTATGAT  
 GTCAGACCTACAGGTGCTGGAACCAAAAAGGTGATTTGACTTTTTGGATAGCGATTCTATA  
 TATTTGAGTAAGATCTAATTACAATAAAATAAGATTTTTCCATGAATCAAGATCTAATAAT  
 TAAAGGACCAATAAGAGATTCAATTTTGCCGATGTGCAGAAAGGGGTACGTTGTCGGCTT  
 GCACTTTTATCAGTGAAACTCTTTATTAAACATTACGTGGTTATCCTAGTAGTCCCAGGA  
 TGTGTAGAGATCTAACTGTCATGGGATCTATAAGATATTCAATTTTGTCAAGACGCGAGA  
 AGTGTATGTCGTCGCCGTGTGTTTTTCATTAGTGAAACTCTTTTTTAAACACCACAAGTG  
 GCTATCCCCTTTGTCCCGGTTGTTTAGAGACATAACAGTTATGGGATCAATAAGATACT  
 TGACTTTATCGAGATGCAAAAAGAGGTATGCAGCCGGCTTGCCTTTTATAAGTGAAACT  
 CTTTGTGAGCTCCATGCATGATCATTATCCCCTTAGTGTCGGGAAGGGATGTTTCAGATC  
 ATGTTTTGATCCTGGTCTGTACCTTTTCATGGAAAGTGACATCTCTACAGTTTATTGGTG  
 AAACCGGATGGTAGATTGATGACACTCCTTTGCCCATATATGGAAGAAAATTGGACATAG  
 AAGATACCAATTCTTCTAATTCAGTCACTAGATGATTAGCACAAATCTGGAATACAACCT  
 ATGTCTTTGCTATTAATAGATTTTCATCTATCTCTCTTTGTTGTACATGCTATATATACCA  
 TGGTTCCCTCCTTAAGCAGCATCTAGTAACATATTATATGTCGACCGTTTTGCAGGAAAAC  
 AATGGAAGTCCATCAGCTGGACAAACTCATGGCCCACTTGAGAAAACCATGGTTCGAACCT  
 GATAGTTCTTTGCGGATATGTCGCATCTACAAGAAGAGGCAACGAACACCACAGTTCATC  
 ATCCCTCCATCCATTGGCGATGCAAGGGAACCATCCTCGCCCTTCCTACAATTGGCAAT  
 ACAAGGGAAGTCGCCCTCGCCCTTCCTGCCATTGACTTCCTGGGGCAGCCATCTTTCGAG  
 GAAGGGAGTGATGTGTCTGCCGATGTCATCACGGATGACAAGGATGGTTATGGCCATGGC  
 ATGAACTAAATAAAGGAAGCCACTCAGCTGTGTCCAGTAAAAATTGCAAGCGGAGTGTTT  
 CCTCGGTGCGAGAAAGACCTATGACCTGTTTATGTGTTTTAATTTGAAGTTCATGCTTGA  
 TACTATGTATTCTATTTAATTAAGTCGGAGTACTCTATGCTGTTCAAACCTGGAGTCTATG  
 TTTTCTGTTTAAGTTGTAGACAAATATATCATTTAATTAGTTTGGGGAAAGTAAAGTGTG  
 CCTATGTTCTAGCTTCTAGGATGAGACGCATTCGCCCCAGATTCAAGATCAATGGGAGGT  
 AGTTACCTGGTAGAGGTAAGTGTGTAAGTGCCTTCTTCAATATATTGTGCTTTTGTGT  
 TTTTTT

CDS

> **ONAC127**

ATGGCCAGCCCTGGAGTTTGCATCAACTTGGTGAATGGTACATCGACGCGCCTCCCCACC  
AATGCTGATCTAGTAGTCCACTACCTGCACCGTCGCGCCATTAGGAACCGGTGCCCTGT  
GACTTCATCACCAACGTCGACATTCTCCAGCACAAACCCCTGGGACATCGTCCCTGCGGAG  
GAGAAGACAAATGGGAAGTACTTCTTCATCCATGAGGAGAACGAACGCCTTGGCAACCAC  
CACAGCAACCGTGCTGCTGGTGATGGGTTCTGGAGGCCAGTAGGCTCAGAGGTGCCGATA  
TATCACAAACGTAGTGGTGGCGCTGATGAAGCACTGGTGGGGATGAAGCGCACCTTGGTA  
TTCCACTACGGGAATTCTTCGTCCGCAAAGCGCACCGAATGGGTGATGCAGGAGTTCCGA  
CTTGCTGGTGCTACCCCTATACCTTGCCCTGTGACGAGGCCAGCCACCGGTGATGGCTCC  
ATGCTTCCCTGCCACCGCACAGGAACGACCATCGCCACGGAACAATGGAAGTCCATCA  
GCTGGACAAACTCATGGCCCACTTGAGAAAACCATGGTGAACCTGATAGTTCTTTGCGG  
ATATGTCGCATCTACAAGAAGAGGCAACGAACACCACAGTTCATCATCCCTCCATCCATT  
GGCGATGCAAGGGAACATCCTCGCCCTTCCTACAATTGGCAATACAAGGGAAGTCGCC  
CTCGCCCTTCTGCCATTGACTTCCTGGGGCAGCCATCTTTCGAGGAAGGGAGTGATGTG  
TCTGCCGATGTCATCACGGATGACAAGGATGGTTATGGCCATGGCATGAACTAA

Protein

> **ONAC127**

MASPGVCINLVNGTSTRLPNADLVVHYLHRRAIQEPVPCDFITNVDILQHNPWDIVPAE  
EKTNGKYFFIHEENERLGNHHSNRAAGDGFWRPVGSEVPIYHKRSGGADEALVGMKRTL  
FHYGNSSSAKRTEWVMQEFRLAGATLIPCPVTRPATGDGSMPLCHRTGTTIATENNGSPS  
AGQTHGPLEKTMVEPDSSLRICRIYKKRQRTQFIIPPSIGDARELILALPTIGNTREVA  
LALPAIDFLGQPSFEEGSDVSADVITDDKDGYGHGMN\*

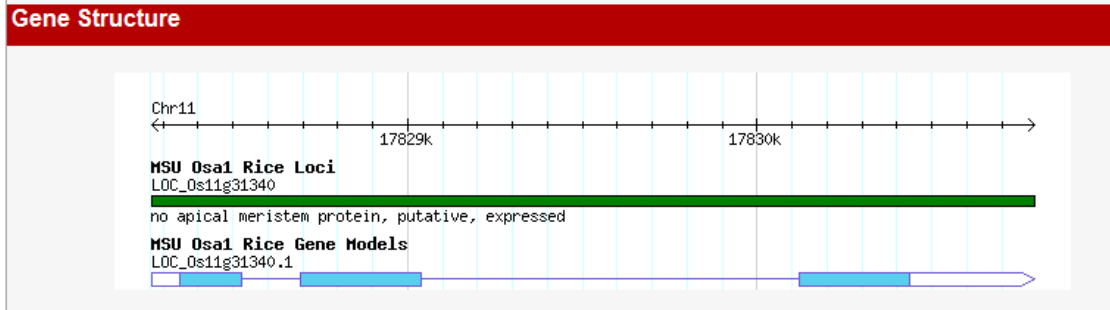

**LOC\_Os11g31360 (ONAC128) sequence information**

**Genomic sequence length:** 2278 nucleotides

**CDS length:** 873 nucleotides

**Protein length:** 290 amino acids

**Putative Function:** no apical meristem protein, putative

Genomic Sequence

> **ONAC128**

ATGGCTGGTCCTGGAGTTTGCATCAACTTGCTGAACGGTACCACGATGCACCTCTCCGTT  
GGGTGTGTGTTCCGCCCCACCGAGGGTGAGCTTGTGTCAACTACCTGTACCGCCGTGCC  
ATGCAGGAGCCGCTGCCTTGCGACTTCATCACCGATGTGGACATCCAGTGCCACAACCCT  
TGGGAAATCGTTCCTGGTAAATATATTTTGACTCGCACTGTGTCACTCCCAAATCTTTGG

CAGCATCTTTGATTAGTTTCATCAATCAGTAGTATCTCCTCAGCTAGATCGTTTGTAGGG  
 ATTTTGACAGTTAATTTCTTGTATGATTATGTTTGAGTGTCAACTTTTCTATTGTTATGT  
 TGGTGATGCTGGAGCAGCAGGGGAGAAGAAGAATGGGAAGCACTTCTTCACCCGCAAGGA  
 GAACAGCCACCCTAGGGACTATGAAAGCAACCATGCCGCTGGTGATGGGTTCTGGAGATT  
 GGCAGGCACAGAGGTCCCAATATACAACAAACCCAGCGGTGGTGCCGATGAAAACTAGT  
 GGGGATGAAACGCACCCTGGTGTTCACCTTTAGGAAGTCTTCATCCACAGAGCGCACCGG  
 ATGGGTGATGCCGACTTGCCGGTGCCAGCCTTGTGCCTTGCCTTGTGATGAGGCCGGCCA  
 CCGGTGATGTCTCCATGCCTCCCTGTGGTTGCACCGAAACAACCACCACCAAGGTGAGAC  
 GCTGCATCCAAACATCACTATGTCTATTGTATTGGATATGATATAGATTCCCCCTCAAAAA  
 AAAAAAGGATATGATATAGATTTGTTTCTGTATTTTTTAATATGATTGGTAAATTATTTGTA  
 TAAAACCGTAGGACTGTGAGGTTCAAGTTGGGGAATAGGGAAACATGAGGAATTACTATC  
 TTATAATTATATAGAGTATTTGTGTCATGTCGCCATTGAGGGGTGCCAATAGGTTTGGGTT  
 GATTGATTGATGCCATGCAAGGTGCGTGGGATCTAGTGGTGATTCAAATTTTGTATATA  
 GTGATCTATGAGATGGTGAATCTAGGGTTGATTTCAAATTTTTCGCATAGTGATTCTATA  
 TAATTCAATCTAGTAGGATGTGTCAACCCAGCAAGGTCTAATGGTTTCACTTACAGAATCC  
 ATAAGAGATTCTAATTTGTGCGAGATGCAAAAAAGGGTATGTTGTGCGCTTGCATTTTTAT  
 TAGTGAAACTCATTATTGAACACCATGTGTTTTTATCCCCTTAGTCCTGAGACGTTTGA  
 GATCTAACAAGTACGGATTCTATTGAATGTTCAAATTTGTGCGGATGCAAAAAGGGCTAT  
 GTTGTGAGTTTGTGTTTTTATTAATGAAATCTTTGCTGAACACTATGCATGCTTGTCCC  
 CTTAGTCTCGGTAAGGGATGTTTAGATCATGATTTGATCTTGTACTCCTGGTCGCTACTT  
 TTCCTTAAAAAAGTGGCATCACTACAGTTATTGGTGAATCGAATGGGGGTGACACTCCTT  
 TGCCCATATTAGGTACTCCCTCCATTTCAGTTATAAGATGTTTGTGACTTTGGTCAAAGT  
 CAAACTATTACAAGTTTGACTAAGTTTTTAAAAAATATAGTAATATTTATAATACCAAAT  
 TAGTTTCATTAAATCAATAATTGAATATATTTTCATAATAAATTTGTCTTGGGTTGAAAA  
 TGTTTTTTTTTCAAACCTAGTCAAACCTAAAGCAAGTTAATTTTGACCAAAGTCAAAACA  
 TCTTATGACCTGAAACGGAGGGAGTAGAAAAATTGGACATAGAGAAGTTACCAAATTCTTC  
 TAATTCAGTCAGTACATGAGTAGCACAAAACCTGGCATGCAACTATTTTTTACTACTAGTA  
 CACTTCATCCGTCTCTCTTTATTGTAGATGCCATCTATACCACGGTTGCACCTTAATAGA  
 CTATATGCGAACTGTTTTGCAGAAAAACAATGGCAGTCCGTCTGCTGCCATACTCATGC  
 CCCTCTGGTGGAACCATGGTTCGAACCTGATAATTCTTGGATGATATGTCGCATTTACAA  
 GAAGAGGCAGCGTGCACCGCAGGTATCATCCCTCCGTCCATTGGCAATGCAAGGGAAGC  
 TGTCTCGCCGTTCCCTGCCATTGGCAATGCAGGCGATCGTCAAGTCACTTCATTGACTTC  
 CCAGGGCATAGATGTTTCGAGGAGGGGAGTGATGAGTCTGCCAATGTCATCACAAGGAC  
 AAGGGCAGTGATGGTTATGGGAAGAACTAATAGAAGGAAGAACTCGGCTTAGTTTAG

CDS

# > ONAC128

ATGGCTGGTCCTGGAGTTTGCATCAACTTGCTGAACGGTACCACGATGCACCTCTCCGTT  
 GGGTGTGTGTTCCGCCCCACCGAGGGTGAGCTTGTGTCAACTACCTGTACCGCCGTGCC  
 ATGCAGGAGCCGCTGCCTTGCAGCTTCATCACCGATGTGGACATCCAGTGCCACAACCCT  
 TGGGAAATCGTTCCCGCAGGGGAGAAGAAGAATGGGAAGCACTTCTTCACCCGCAAGGAG  
 AACAGCCACCCTAGGGACTATGAAAGCAACCATGCCGCTGGTGATGGGTTCTGGAGATTG  
 GCAGGCACAGAGGTCCCAATATACAACAAACCCAGCGGTGGTGCCGATGAAAACTAGTG  
 GGGATGAAACGCACCCTGGTGTTCACCTTTAGGAAGTCTTCATCCACAGAGCGCACCGGA  
 TGGGTGATGCCGACTTGCCGGTGCCAGCCTTGTGCCTTGCCTTGTGATGAGGCCGGCCAC

CGATGCCATCTATACCACGGTTGCACCTTAATAGACTATATGCGAACTGTTTTGCAGAAA  
 AACAAATGGCAGTCCGTCTGCTGCCATACTCATGCCCCCTCTGGTGGAACCATGGTCGAA  
 CCTGATAATTCTTGGATGATATGTCGCATTTACAAGAAGAGGCAGCGTGCACCGCAGGTC  
 ATCATCCCTCCGTCCATTGGCAATGCAAGGGAAGCTGTCCTCGCCGTTCTGCCATTGGC  
 AATGCAGGCGATCGTCAAGTCACTTCATTGACTTCCCAGGGCATAGATGTTTCGAGGAGG  
 GGAGTGATGAGTCTGCCAATGTCATCACAAAGGACAAGGGCAGTGATGGTTATGGGAAGA  
 ACTAATAGAAGGAAGAAACTCGGCTTAGTTTAG

#### Protein

#### > ONAC128

MAGPGVCINLLNGTTMHLVSGCVFRPTEGELVVNYLYRRAMQEPLPCDFITDVDIQCHNP  
 WEIVPAGEKKNGKHFFTRKENSHPRDYESNHAAGDGFWRLAGTEVPIYNKPSGGADEKLV  
 GMKRTL VFHFRKSSSTERTGWVMPTRCQCPCALPCDEAGHRCHLYHGCTLIDYMRTLQK  
 NNGSPSAAHTHAPLVETMVEPDNSWMICRIYKKRQRAPQVIIPPSIGNAREAVLAVPAIG  
 NAGDRQVTSLSQIDVSRRGVMSLPMSQRTRAVMVMGRTNRRKKLGLV\*

#### Gene Structure

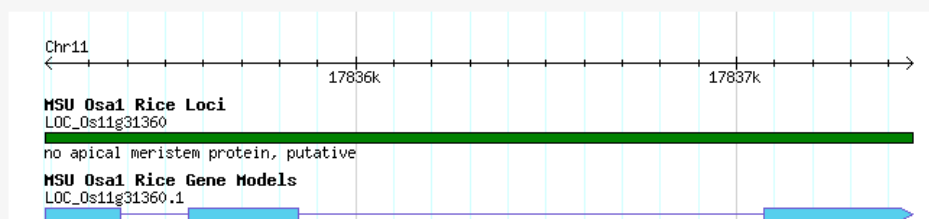

#### LOC\_Os11g31380 (ONAC129) sequence information

**Genomic sequence length:** 1900 nucleotides

**CDS length:** 723 nucleotides

**Protein length:** 240 amino acids

**Putative Function:** no apical meristem protein, putative

#### Genomic Sequence

#### > ONAC129

ATGCACCTCCCCGCTGTGGGCATGTCACACCCACCGAGGGTGAGCTTGTCTTCCACTAC  
 CTCTATCGTCGTGCCGTTAACATGCCGCTGCCCTCTGAATTCATTTGTGATGTCAACGTT  
 CTTCTCATAACCCATGGGACATCGTCCCAGGTAAGTATATTTTGAATTATGCTGCCATA  
 TCATCTTGCTCCATAAAAAATTGTTAGCACATCCAGATACATCTCGAATTGATTAATCTA  
 TGTCTACCAGGCTTGATTGATTGCATGGCCTAATGTCCGATTTGTTGTTGGTTTTGTTTT  
 TGTCTTTTTTCTCTCTTGTTCATGATGGTGATCATGGACATAGGAGCACTGACATAGA  
 GGGAGAAAGGGAAGTACTTCTTTATGCAGAAGGAGATAAAGTGCCCTAGTAGTCGCCGTA  
 GCAACCGTATCACAAAGTAAAGGGTTCTGGAGGTCGGCAGGCTCAGAAAAGCCAGTCTACT  
 ACAACCAGGGAGGTGGCAGCGACTGCATGCTGGTGGGAATGAGGCGCACCTAACATTTT  
 ACTTTGGGAATTCACGGACCGCAGAGCGCACAAAATGGGGTATGCAAGAATTCGCCTTG  
 CTGGCAATGGTCTTTCGCCTTACCCTGCGATGAAGCATGCCACCGGGGATGGCTCAAAC

CACCCTGCAACTGTGCCGAAACAACCATCGCCAAGGTAATTAAGATGTTGACTTCAAACA  
 TTTTCCTGTCATCATTTTTTAATCGTCTTGTTTCGTTTCATCTGCAAATTGAATCTAATAA  
 GTTTGTTATTTTCGAGCAAGTGTAATTTGTGAGGTTTAGCTTTGGGAAATAGGGAGGGG  
 GATTTAATAAATATGATGAGCCGCTTCTAGATATAACTCTCATGTCGATTTTATTCATG  
 GAAAGGAAAAGGTAGAGATTGTCTTTGATGCCGCTTAGGGTACATGCTATTAGATCTGTA  
 GTTATGGACTGCTGCGATGCAAGGAACGTGGGATCTATACATGATTCAAATTTTGTGCGAG  
 ACGTAGGGATTTATAGTTGGTAAAACTAGATATGTATATGTGTCAGTGGGGAGTTCCAT  
 GCATATGTGTCAGTGGGATCGAGTCGATGTATTATAAAATTTTGTGATAAGGTTAGATCTG  
 GTTACGAGATCTATAATCGACTTGAATTTGACAAGAAGACAAAAGTGGTTTGTGTCAGC  
 TTGCGAGCAATGAACCTATTTAATGAACACCATGTGTTGTTAACTCGTTTCTCCCATGAT  
 TTTTGAGTTTTATATCAGATAATGTATCAACCATTTATTGGTCAAATTTTCTGTGATGT  
 TCAAACCTGAACAATGGAGAATACTCATTTTCCGACATCAGGAAGAAAAGTATAACAAAT  
 AAGTTACCATGTCTTTCAAATTCAGTAGCTATGTTATTAGCATCCGTATATAACATATAT  
 AAAAAATATTCCTTTCCAACCTAATAGTACTTCATCAATTTTCCCTTAGGTATACATCTTA  
 CATATACCATGCTTTGTGCGTTTCAGCAGCATCCATTAACAGGCAATTCGGTGACTGTTTT  
 GCAGAGAAATGATGGTCTCTCTGCAGTTCTTCGTAATGTGCTCGCCGTCACCCCCCTTGT  
 GGAAACCGTTGTGCAACCTGATGGATCATGGCTGATCTGCCGCATCTACAGGACAAGGCA  
 GCGTGCAATTGCTGTATCACTCCTCCTGCCATAGAAAATGCAAGGGAAATCATTATCCC  
 TCCTGCCAATGGCAATGCAAGGGAGGCTCAAGTCCGCTTTATTGACTTCCTGCAGCAGGG  
 ATCGCACATTGAGTCATCCTCCCCCTGTAGTTGTATAGTTGGCCCCCTCTTTGGCAGAGGG  
 AAGTGATGAATCTGCTGGTAGTGTTGACCAAAAGGATTGA

CDS

> **ONAC129**

ATGCACCTCCCCGCTGTGGGCATGTCACACCCCACCGAGGGTGAGCTTGTCTTCCACTAC  
 CTCTATCGTCGTGCCGTTAACATGCCGCTGCCCTCTGAATTCATTTGTGATGTCAACGTT  
 CTTCTCATAACCCATGGGACATCGTCCCAGGCTCAGAAAAGCCAGTCTACTACAACCAG  
 GGAGGTGGCAGCGACTGCATGCTGGTGGGAATGAGGCGCACCCCTAACATTTTACTTTGGG  
 AATTCACGGAACCGCAGAGCGCACAAAATGGGGTATGCAAGAATTTGCGCTTGCTGGCAAT  
 GGTCTTTGCGCTTACCCTGCGATGAAGCATGCCACCGGGGATGGCTCAAAACCACCCTGC  
 AACTGTGCCGAAACAACCATCGCCAAGAGAAAATGATGGTCTCTCTGCAGTTCTTCGTAAT  
 GTGCTCGCCGTCACCCCCCTTGTGAAAACCGTTGTCGAACCTGATGGATCATGGCTGATC  
 TGCCGCATCTACAGGACAAGGCAGCGTGCAATTGCCTGTTATCACTCCTCCTGCCATAGAA  
 AATGCAAGGGAAATCATTATCCCTCCTGCCAATGGCAATGCAAGGGAGGCTCAAGTCCGC  
 TTTATTGACTTCCTGCAGCAGGGATCGCACATTGAGTCATCCTCCCCCTGTAGTTGTATA  
 GTTGGCCCCCTCTTTGGCAGAGGGAAGTGATGAATCTGCTGGTAGTGTTGACCAAAAGGAT  
 TGA

Protein

> **ONAC129**

MHLPAVGMSHPTEGELVFHYLYRRAVNMPLPSEFICDVNVLPHPWDIVPGSEKPVYYNQ  
 GGGSDCMLVGMRRRLTFYFGNSRTAERTKWGMQEFRLAGNGLSPYPAMKHATGDGSKPPC  
 NCAETTTIAKRNDGLSAVLRNVLAVTPLVETVVEPDGSLICRIYRTRQRALPVITPPAIE  
 NAREIIIPPANGNAREAQVRFIDFLQQGSHIESSPCSCIVGPSLAEGSDESAGSVDQKD

\*

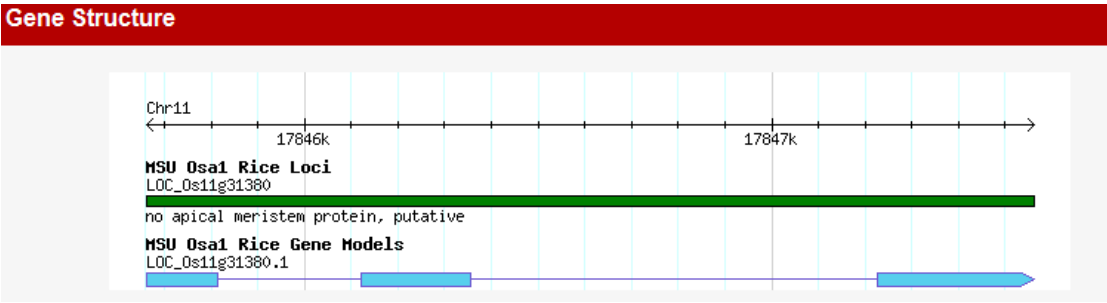

**LOC\_Os11g45950 (ONAC130) sequence information**

**Genomic sequence length:** 791 nucleotides  
**CDS length:** 411 nucleotides  
**Protein length:** 136 amino acids  
**Putative Function:** NAC domain-containing protein 90, putative, expressed

Genomic Sequence

> **ONAC130**  
ATGGGTGCCGGGGCTGGGGAGCCGTGGTTCTACTTCCGCCACCATGAGAGATGGATGCAC  
CGGATGGACCGGAGCACACCATCAGGGTATTGGAAGACCGCAGGCAAAGCCAGTTTCGTG  
TACTCTGCAGATAGACATCCCGTCGGATTGAAGAAGAGCATGTTGTTCTACCGCGGCCCC  
GAGCCGTGCGGGCGCAAAACCAAGTGGAAGATCGACGAGTTTGGGCACTTGACAACGCC  
GCCAATGGGTCTGGGGAGCTTTTGGCGCAGTTGTGCCGCTCACGGCAAAACGTTGGTCTC  
ATGGTATGTAATCAATCTCTAACTGATACGTACGCGCGGAGCAAGCACTTTATACATT  
TATTACTTGCATTAATTGTGTAATAAATCTTTATGGTTGTTTTCTCGTAGTAGTTTTTTT  
TCCACTGAGGGAGTAAATAACTAGATATGCCATATGTATACTCTCTATCCTAAAATAT  
AAGAGATTTTAGGTGAATGTGATATATGGTAGGACCATAAATCTAGGGAAAGAGAGTATG  
TTTAGATTTATATGGTCATATGATACATCACATTTACCTAAAATTACTTATATTTTAGAA  
CGGATGGAGTATTTAATTACCATACATCTCAAGTATATACGTACCTCTTACAATTAATTA  
TTAATATACACATGTTTTTGCAGCCGAGGTTCCCTCTCAGCTTGTGTGCGGTGTACAGTA  
CAAAATCGAGCTCAGAGCGCCATGTCCTAGCCACCAGTAGCGATGAAATCTCCGAGGACG  
AATCCGACTAG

CDS

> **ONAC130**  
ATGGGTGCCGGGGCTGGGGAGCCGTGGTTCTACTTCCGCCACCATGAGAGATGGATGCAC  
CGGATGGACCGGAGCACACCATCAGGGTATTGGAAGACCGCAGGCAAAGCCAGTTTCGTG  
TACTCTGCAGATAGACATCCCGTCGGATTGAAGAAGAGCATGTTGTTCTACCGCGGCCCC  
GAGCCGTGCGGGCGCAAAACCAAGTGGAAGATCGACGAGTTTGGGCACTTGACAACGCC  
GCCAATGGGTCTGGGGAGCTTTTGGCGCAGTTGTGCCGCTCACGGCAAAACGTTGGTCTC  
ATGCCGAGGTTCCCTCTCAGCTTGTGTGCGGTGTACAGTACAAAATCGAGCTCAGAGCGC  
CATGTCCTAGCCACCAGTAGCGATGAAATCTCCGAGGACGAATCCGACTAG

Protein

> **ONAC130**

MGAGAGEPWFYFRHHERWMHRMDRSTPSGYWKTAGKASFVYSADRHVPGLKKSMLFYRGP  
EPSGRKTKWKIDEFWALDNAANGSGELLAQLCRSRQNVGLMPRFPLSLCRLYSTKSSSER  
HVLATSSDEISEDESD\*

Gene Structure

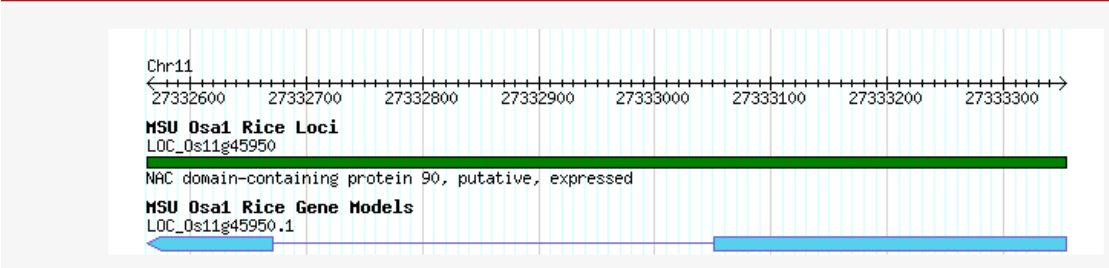

**LOC\_Os12g03040 (ONAC131) sequence information**

**Genomic sequence length:** 2337 nucleotides

**CDS length:** 1182 nucleotides

**Protein length:** 393 amino acids

**Putative Function:** no apical meristem protein, putative, expressed

Genomic Sequence

> **ONAC131**

AATTAGCTCTCATTAATCAATTGCTTTGTAGTAATCCATCCATGCACCCACCTCTCTTTC  
TCCCGAACAGCAAGAAGATGAGCCAAGCCCATGGCGTCTATAAAGAGAGCCCTACCCCC  
TCCATCTCAAAAATTTCAATCCTTCCTCTTCCTTAGCTTATTAGCTTCCTTCCTTCACTA  
GTGCCAGTTTTCTCTACGTAATCTAAGCTAGCCAGGTCGTCATCTTCTTCCTTCAGCT  
CACGCTGACCAAAACACCATCTGTTATTCTGTTTGTGTTTTTTTTTAAAAAAGAAAAA  
AAATCTAGCTAGGCGAGCCGATTGAAGGAGCTGAGCATGCCGAGCAGCGCGGCCGCGCATG  
CCTGCCCTTCCACCAGGCTTCCGCTTCCACCCACCGACGAGGAGCTCATCGTTCACTAC  
CTCATGAACCAGGCCGCTCCATCAAGTGCCCCGTGCCAATCATCGCCGAGGTCAACATC  
TACAAGTGCAACCCATGGGACCTTCTTGTTAACTAACTAACTAATCACCATACATATATA  
AACTATCCATGTATCAATTAACCTCGATCAAATTAATGCCTTCAAACCTGACCAAATTTAA  
TTTTGGGCTTTGAAAATGGATATGGAATGTTGCAGGTAAGGCGCTGTTTCGGCGAGAACGA  
ATGGTACTTCTTCAGCCCCGAGGGACCGCAAGTACCCCAACGGCGCACGCCCCAACCGCGC  
CGCCGGCTCGGGGTACTGGAAGGCCACCGGCACCGACAAGTCCATCTTGTCAACTCCGAC  
GAGCGACAACATCGGCGTCAAGAAGGCCCTAGTCTTCTACAAGGGCAAGCCCCCAAGGG  
CGTCAAGACCGACTGGATCATGCACGAGTATCGCCTCACAGGCACATCAGCTAACAACAC  
CACCACCACAAAGCAGCGTAGAGCATCATCCATGACCATGAGGGTGAGATTCAATTTAATT  
ACTTAATTTTAGTTCATTATTAATTTGTTTTTCTTCTCGTCGTACGTCTTCTTTGAAAGC  
TACGTCGTTGTTTGAATTGGCATATTGAAGGAAGCAAACGTGCATGTTGCTCTTAGTTAA  
CTCACTCTACAAAGTCAAATTTGTTGATGTTGATTGAGCTTGTGTTTTATTCTTTATTTT  
AAAAATAAATAAAGCAAGTTTGCACACTTCTAATTATTGTTTACTGCATTTGTGATATTG  
TTCATCAGCTGGACGACTGGGTGCTGTGCAGAATCCACAAGAAGAGCAACGACTTCAATT

CCTCTGACCAACACGACCAAGAACCCGAGGGATCAACCGTCGATGAACAGCTTGAAGACA  
 TCCATGACAACAACCTCTTCCCTCTCAACAACCTCCTGCTCCACCTGACATGAACAACCAAC  
 AGTCAGATTTCCAGCCCATGACGGCGATGAGCATGAGCAAGTCATGCTCCCTCACCGATC  
 TCCTCAACAACCTCGACTGCGCCGCGCTCTCGCAGTTTCTCCTCGACGGCTCATCCGACG  
 CCATCGCTGAGCTTCTGCTCCTCCCAGCCCTCTAATATATCCAAACCAAACACTAAACT  
 ATAACATCAACAACAACATGCCACACGCCTTCGAGTCACGCCTAGATCATCACGATGGTT  
 ACGTTAACAATTATAATGTTAATGGCCTAAGGAGGAAGAGAATGATGGCGTGTAGTGCAA  
 CTTCTTTTGATGATGGCAGCAGCAGCAGCAGTGACTTTTTGCATGTTGCCAAGAAAC  
 CGCTGCTGCTGCCAAGTGATTCAAGGGGCAGTGGTTTTGGAGGAGGTTACTGCAACCAGC  
 AGCTTTCAGAGACTGCGACTGGTTTTTCAGTTTCAGAACGGCAATATGTTGAGCCATCCAT  
 TTCTCTGAACCAGCAGCTACTGCTGAACAATCATCTGCAGATGCAGTAGCTAGTAGGCG  
 TCTAGATCCGTTTACCGATCGATCTGAAGAGAGGTGAATTAATTTCAACGAATGAAACTA  
 CAGATTCAGAGAGGAAGATACTGATTGTTCCATTTGGATTTATTTTGAGGAGTTGCATGA  
 CAGATAGACAAACAGACGGAATTCCTGATGTAACCCATGCAAGGAAAGATTCAGATTTCT  
 TCCTATGGCATTAATTTGTGAGTTTTTTTTTGTTCATTTTCATGTACAAGAATGTAAA  
 TTATAAATGGTAATATCGTGCAAGCTAGTACTCAAGCCAATTTATATGATAATCTTTATG  
 CATGTTTCTTAATTATTCTGGTATCAAGCACACGAAAGAAACATGCTACTTTGTGCTTGA  
 TTCATTGGACCTTACAAATTAACAATTTGTTCTTGTCTGAATGTGCTGATATATAA

CDS

> **ONAC131**

ATGCCGAGCAGCGGGCGGCCATGCCTGCCCTTCCACCAGGCTTCCGCTTCCACCCCACC  
 GACGAGGAGCTCATCGTTCACTACCTCATGAACCAGGCCGCTCCATCAAGTGCCCCGTG  
 CCAATCATCGCCGAGGTCAACATCTACAAGTGCAACCCATGGGACCTTCCTGGTAAGGCG  
 CTGTTTCGGCGAGAACGAATGGTACTTCTTCAGCCCCGAGGGACCGCAAGTACCCCAACGGC  
 GCACGCCCCAACCGCGCCCGGGCTCGGGTACTGGAAGGCCACCGGCACCGACAAGTCC  
 ATCTTGTCAACTCCGACGAGCGACAACATCGGCGTCAAGAAGGCCCTAGTCTTCTACAAG  
 GGCAAGCCCCCAAGGGCGTCAAGACCGACTGGATCATGCACGAGTATCGCCTCACAGGC  
 ACATCAGCTAACAACACCACCACCAAAAGCAGCGTAGAGCATCATCCATGACCATGAGG  
 CTGGACGACTGGGTGCTGTGCAGAATCCACAAGAAGAGCAACGACTTCAATTCCTCTGAC  
 CAACACGACCAAGAACCCGAGGGATCAACCGTCGATGAACAGCTTGAAGACATCCATGAC  
 AACAACCTCTTCTCTCAACAACCTCCTGCTCCACCTGACATGAACAACCAACAGTCAGAT  
 TTCCAGCCCATGACGGCGATGAGCATGAGCAAGTCATGCTCCCTCACCGATCTCCTCAAC  
 AACCTCGACTGCGCCGCGCTCTCGCAGTTTCTCCTCGACGGCTCATCCGACGCCATCGCT  
 GAGCTTCTGCTCCTCCCAGCCCTCTAATATATCCAAACCAAACACTAAACTATAACATC  
 AACAACAACATGCCACACGCCTTCGAGTCACGCCTAGATCATCACGATGGTTACGTTAAC  
 AATTATAATGTTAATGGCCTAAGGAGGAAGAGAATGATGGCGTGTAGTGCAACTTCTTTT  
 GATGATGGCAGCAGCAGCAGCAGCAGTGACTTTTTGCATGTTGCCAAGAAACCGCTGCTG  
 CTGCCAAGTGATTCAAGGGGCAGTGGTTTTGGAGGAGGTTACTGCAACCAGCAGCTTTCA  
 GAGACTGCGACTGGTTTTTCAGTTTCAGAACGGCAATATGTTGAGCCATCCATTTCTCTG  
 AACGACGAGCTACTGCTGAACAATCATCTGCAGATGCAGTAG

---

Protein



> **ONAC131**

MPSSGGAMPALPPGFRFHPTDEELIVHYLMNQAASIKCPVPIIAEVNIYKCNPWDLPGKA  
 LFGENEWYFFSPDRKYPNGARPNAAGSGYWKATGTDKSLSTPTSDNIGVKKALVFYK  
 GKPPKGVKTDWIMHEYRLTGTSANNTTTTKQRRASSMTMRLDDWVLCRIHKKSNDFNSSD  
 QHDQEPEGSTVDEQLEDIHDNNSSSQPPAPPDMNNQQSDFQPMTAMSMKSCSLTDLN  
 NLDCAALSQFLLDGSSDAIAELPAPPSPLIYPNQTLNINNNMPHAFESRLDHHDGYVN  
 NYNVNGLRRKRMMACSATSFDDGSSSSSSDFLHVAKKPLLLPSDSRSGFGGGYCNQQLS  
 ETATGFQFQNGNMLSHPFPLNQQLLLNHLQMQ\*

**Gene Structure**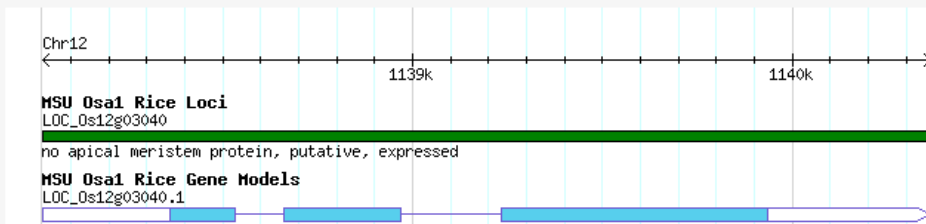**LOC\_Os12g03050 (ONAC132) sequence information**

**Genomic sequence length:** 1748 nucleotides

**CDS length:** 1191 nucleotides

**Protein length:** 396 amino acids

**Putative Function:** no apical meristem protein, putative, expressed

## Genomic Sequence

> **ONAC132**

GTTCCATTTCCCATTTCATCGCGCGTCGCTCCACCTTTCTTGCTTGTGCCACCAAGCTAT  
 CTCCTCCTCTCCTTCTCCTCTAGCTAGAGCTAGTGCTTCCTCCATCTTCAGTCTAGCTTC  
 AATTCAAGCTAGGGAGCAAGCTAGCTAGCTAGCATGGTGGAGTCTACTACATCCCTTGTG  
 AAATTAGAGCAAGATGGAGGCTTGTCTTGCCCTCCAGGCTTCAGGTTTCACCCGACGGAC  
 GCTGAGGTAATCTTAAGCTACCTCCTGCAGAAGTTGCTCAACCCTAGCTTCACCTCCTTG  
 CCCATCGGCGAGGTCGACCTCAACAAGTGCAGGATGGGATCTTCCAAGTAAGTCAAAT  
 TTGTTTTTCTTTTCTTCTTCGATCCAAAAGCTTATATTTAGATGCACAAGTAGTTAATTA  
 GATCTTGATGTAAATATGCTTGTGTTTTCATATTAATTTGATGAAGGCAAGGCGAAGATGG  
 GGGAAAAAGAATGGTACTTCTTCAGCCACAAGGACATGAAATACCCAAGTGGCATGCGAA  
 CCAACCGGGCCACCAAGGAGGGCTACTGGAAGGCCACCGGCAAGGACAGGGAGATCTTCA  
 GGCAGCCTGCAGCTGTTAATACAAGCAGCTATGGAGGCAGCAGCAACAAGAAGAAGCAGC  
 TGGTTGGGATGAAGAAGACGCTGGTGTCTACATGGGGAGGGCTCCCAAGGGCACCAAGA  
 CCAACTGGGTGATGCACGAGTTCGTCCTCCACGCCAACCTCCACAACCACCACCCAAACC  
 TTCGTCTGAATCCCAAGGACGAATGGGTGTGTGCAAGGTCTTCCACAAGAAGCAGGGAG  
 ACGAAGCCATCAACAACCAGCAGCAGCAACCACAGTATGCAGCCGTGGATCAGTACTCTG  
 CCGAAACCCCAACAGCGGCAGCTCCGTCGTTCAAGCCGGCGACATCGACGGCGGCGATG  
 ACTTCTTTCAGCTAGACGACATCATTGACCCAGCATCTACTTCGTCAGCAACTCTTCCA  
 ACATCTGTGCGCGCCGCCAACAAACAACACGCGTTTATTCCGTTTCTGCAAGTACGA  
 CGACGACTAATACTACTGCCGTTAGCTTCCAGCAGCAGCCAACTACTACAGCTTGATCA

ACAAAAGCAGCAGCAGCAGCAGCAACTATAGTGCTCCTCTGCAGCAGCACGTCTCTT  
 CTTGGAATATTACGCCTGGAGCTGGAGGAGCCCATGGAATTGGAAGCAGCTACTACAAC  
 TGCAGCAGCAGCAGGCAGCAATGGTGAAAGCCCTAGAAAATGTCATTGCTGTCCCGAATT  
 TTGGTACTCTACTGCCGAGCAGCAACAAGCTGAAGGGTTTATCGAAGTCGGCGATGGCTG  
 GGCTTACGCAGCAGAATCCCCCTTGGCGTGCCGCAGTACAAGATAGAGAATTATGGGGATC  
 ATTACATATCACGACAGTAATGATCACATATACATATATATTGCATGCTGCTGCGTTCTG  
 AGAATTTTTGTGCTCGGCTACTGCATTACTGAATTACGTACTGAACATGGACATCATCGA  
 GATTTAGGAATATATGTGTGTGCAATTTATTTTTGTTGACTGCTTCATTATTTAGTTCTT  
 CCTAGGTAGCTAGCGAGATCATTTCGTCTATATATATTCGTTTGCTTAATAGGTTTCTTT  
 TGTATATACAAAGGTCGTGTTTGTGTTTGTGTTAATTAATTTGTTGGTGCTAACTACTACTGA  
 TTGTTGAT

CDS

> **ONAC132**

ATGGTGAGTCTACTACATCCCCTTGTGAAATTAGAGCAAGATGGAGGCTTGTCTTGCCT  
 CCAGGCTTCAGGTTTCACCCGACGGACGCTGAGGTAATCTTAAGCTACCTCCTGCAGAAG  
 TTGCTCAACCCTAGCTTCACCTCCTTGCCCATCGGCGAGGTCGACCTCAACAAGTGCGAG  
 CCATGGGATCTTCCAAGCAAGGCGAAGATGGGGGAAAAAGAATGGTACTTCTTCAGCCAC  
 AAGGACATGAAATACCCAACCTGGCATGCGAACCAACCGGGCCACCAAGGAGGGCTACTGG  
 AAGGCCACCGGCAAGGACAGGGAGATCTTCAGGCAGCCTGCAGCTGTTAATACAAGCAGC  
 TATGGAGGCAGCAGCAACAAGAAGAGCAGCTGGTTGGGATGAAGAAGACGCTGGTGTTT  
 TACATGGGGAGGGCTCCCAAGGGCACCAAGACCAACTGGGTGATGCACGAGTTCCGTCTC  
 CACGCCAACCTCCACAACCACCACCCAAACCTTCGTCTGAATCCCAAGGACGAATGGGTT  
 GTGTGCAAGGTCTTCCACAAGAAGCAGGGAGACGAAGCCATCAACAACCAGCAGCAGCAA  
 CCACAGTATGCAGCCGTGGATCAGTACTCTGCCGAAACCCCCAACAGCGGCAGCTCCGTC  
 GTTCAAGCCGGCGACATCGACGGCGCGATGACTTCTTTCAGCTAGACGACATCATTGAC  
 CCCAGCATCTACTTCGTGAGCAACTCTTCCAACATCTTGTGCGGCGCCGCCAACACAAC  
 AACGCGGTTTATTCCGTTTCTGCAAGTACGACGACGACTAATACTACTGCCGTTAGCTTC  
 CAGCAGCAGCCAACTACTACAGCTTGATCAACAAAAGCAGCAGCAGCAGCAGCAGCAAC  
 TATAGTGCTCCTCTGCAGCAGCACGTCTCTTCTTGAATATTACGCCTGGAGCTGGAGGA  
 GCCCATGGAATTGGAAGCAGCTACTACAACCTGCAGCAGCAGCAGGCAGCAATGGTGAAA  
 GCCCTAGAAAATGTCATTGCTGTCCCGAATTTTGGTACTCTACTGCCGAGCAGCAACAAG  
 CTGAAGGGTTTATCGAAGTCGGCGATGGCTGGGCTTACGCAGCAGAATCCCCCTTGGCGTG  
 CCGCAGTACAAGATAGAGAATTATGGGGATCATTACATATCACGACAGTAA

Protein

> **ONAC132**

MVESTTSLVKLEQDGGFLPFGFRFHPTDAEVILSYLLQKLLNPSFTSLPIGEVDLNKCE  
 PWDLPSSKAKMGEKEWYFFSHKDMKYPTGMRTNRAKEGYWKATGKDREIFRQPAAVNTSS  
 YGGSSNKKKQLVGMKKTLVFYMGRA PKGTKTNWVMHEFRLHANLHNHHPNLRNPKDEWV  
 VCKVFHKKQGDEAINNQQQQPQYAAVDQYSAETPNSGSSVVQAGDIDGGDDFFQLDDIID  
 PSIIYFVSNSSNILSAPPNNNNNAVSVSASTTTTNTTAVSFQQQPNYYSLINKSSSSSSSN  
 YSAPLQQHVSSWNITPGAGGAHGIGSSYYNLQQQAAMVKALENVIAPNFGTLLPSSNK  
 LKGLSKSAMAGLTQQNPLGVPQYKIENYGDHYISRQ\*

Gene Structure

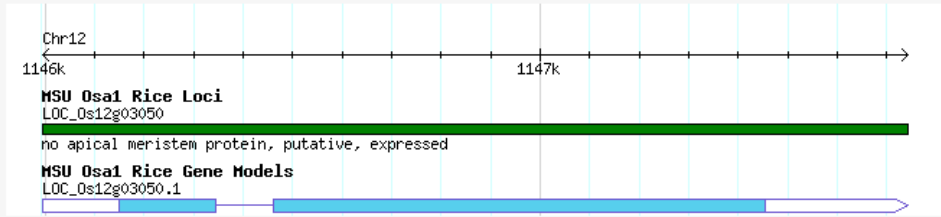

LOC\_Os12g04230 (ONAC133) sequence information

**Genomic sequence length:** 1110 nucleotides

**CDS length:** 1098 nucleotides

**Protein length:** 365 amino acids

**Putative Function:** expressed protein

Genomic Sequence

> **ONAC133**

```
ATGGCGGAAGAAGATGACAAGAAGCAGAAGGGCCCCGACGTGACGGTGCCCTCGGGATAC
TTCTTCGTGCCGAAGCCGGAGCAGCTCATCCGCGACTACCTCAACCACTGGATCACCGGC
CGGCCGATCGAGGAGCTCCGGGACATCGTCCGGGAAGCCGACGTCTACGGCTCCGACCCG
GCGACGCTGACGGAGGCGCATAGGGCGTACGGCCACGACGGCAAGTCGTGGTACTTCCTC
ACCGTCGCCAAGTGGAAGGGCGGCAGGGGCGGCGCCGGCACCGCCGGCCGGCTCAACCGC
TGCGTCGAGGGCGGCGGCACGTGGCACAACTCGCAGCGCCGCCGCGTCATCGAGGGCTAC
GGCGACCGCCAGGCTTTCGAGTACCGCGCCCCCGGAACAAGAAGACGAACTGGCTCATG
GAGGAGATCGCCAGCAACCTGCCGGCGGCGATCACCGACGAGGGCATCATGGTCATCTGC
AAGGTCTACCTCTCGCCGAGGGCCAAGGAGGCGACGGCCGACGAGGAGGAACGCCAAGAA
ACCAACGTGGTTCCCGGGCCCAAGAGGCTCCGAGAGGCGGAAGCCACCGGCTACGACGCG
CCGGCGCCGGAGACGCCACAGCCCGACGTTCGGATGCTCGTACTCCGGCGGCGGCGAGACG
TCTCAAGCGACCGCCTCGATGGACTACTGCTGCTCGACGACGACACACAGGCGGACGAC
ACGGCCAATGCCGCCGCTACTACTACGGCGACGTTGATGCCATCAAGCCAGATGCTTAC
GACGGCGGCGACTACGGCATCGGCATCAACGCAGACGGGGAGCTGGTTCTCTGCGGCAAC
GGCCACGGTGGCATCGGGACGCAGGGACAGATGCCATTGGCAATGCAGAACCAACGGG
GAGATGACCTTGTCTCACCAGTGAACGGCTATGGTGTGGCTTCAATGAGGAGGTGAGA
CAAGAACCACAAGTAGGAGGTGAGGTGGAGATGAATGATTTCTTCAACGATTTGTTTCGTC
GACTTCGACGGCGCCGGTGATCCCAATCCCAATCCCAACGAGGGTGGAGACAGCCACGGC
CACATACTATGTGAATGAATTGAATCGCTG
```

CDS

> **ONAC133**

```
ATGGCGGAAGAAGATGACAAGAAGCAGAAGGGCCCCGACGTGACGGTGCCCTCGGGATAC
TTCTTCGTGCCGAAGCCGGAGCAGCTCATCCGCGACTACCTCAACCACTGGATCACCGGC
CGGCCGATCGAGGAGCTCCGGGACATCGTCCGGGAAGCCGACGTCTACGGCTCCGACCCG
GCGACGCTGACGGAGGCGCATAGGGCGTACGGCCACGACGGCAAGTCGTGGTACTTCCTC
```

ACCGTCGCCAAGTGAAGGGCGGCAGGGGCGGCGCCGGCACCGCCGGCCGGCTCAACCGC  
 TCGCTCGAGGGCGGCGGCACGTGGCACAACCTCGCAGCGCCGCCGCGTCATCGAGGGCTAC  
 GCGGACCGCCAGGCTTTCGAGTACCGCGCCCCCGGAACAAGAAGACGAACTGGCTCATG  
 GAGGAGATCGCCAGCAACCTGCCGGCGGCGATCACCGACGAGGGCATCATGGTCATCTGC  
 AAGGTCTACCTCTCGCCGAGGGCCAAGGAGGCGACGGCCGACGAGGAGGAACGCCAAGAA  
 ACCAACGTGGTTCCCGGGCCCAAGAGGCTCCGAGAGGCGGAAGCCACCGGCTACGACGCG  
 CCGGCGCCGAGACGCCACAGCCCCGACGTCGGATGCTCGTACTCCGGCGGCGGCGAGACG  
 TCTCAAGCGACCGCCTCGATGGACTACTGCTGCTCGACGACGACACACGCGCGGACGAC  
 ACGGCCAATGCCGCCGCTACTACTACGGCGACGTTGATGCCATCAAGCCAGATGCTTAC  
 GACGGCGGCGACTACGGCATCGGCATCAACGCAGACGGGGAGCTGGTTCTCTGCGGCAAC  
 GGCCACGGTGGCATCGGGACGCAGGGACAGATGCCATTGGCAATGCAGAACCAACGGG  
 GAGATGACCTTGTCTCACCGATGAACGGCTATGGTGTGGCTTCAATGAGGAGGTGAGA  
 CAAGAACCACAAGTAGGAGGTGAGGTGGAGATGAATGATTTCTTCAACGATTTGTTTCGTC  
 GACTTCGACGGCGCCGGTGATCCCAATCCCAATCCCAACGAGGGTGGAGACAGCCACGGC  
 CACATACTATGTGAATGA

Protein

> **ONAC133**

MAEEDDKKQKGPDTVPSGYFFVPKPEQLIRDYLNHWITGRPIEELRDIVREADVYGSDP  
 ATLTEAHRAYGHDGKSWYFLTVAKWKGGRRGGAGTAGRLNRCVEGGGTWHNSQRRRVIEGY  
 GDRQAFEYRAPGNKKTNWLMEEIASNLPAAITDEGIMVICKVYLSPRAKEATADEEERQE  
 TNVVPKRLREAEATGYDAPAPETPQPDVGCSYSGGGETSQATASMDYCCSTTHTADD  
 TANAAAYYYGDVDAIKPDAYDGGDYGIGINADGELVLCNGHGGIGTQGMPLAMQNTNG  
 EMTLFSPMNGYGVGFNEEVRQEPQVGGEVEMNDFNDLFVDFDAGDPNPNPNEGGDSHG  
 HILCE\*

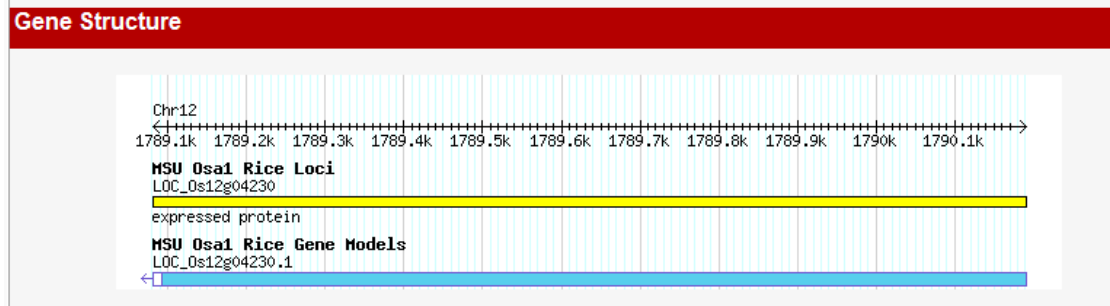

**LOC\_Os12g05990 (ONAC134) sequence information**

**Genomic sequence length:** 1285 nucleotides

**CDS length:** 924 nucleotides

**Protein length:** 307 amino acids

**Putative Function:** No apical meristem protein, putative, expressed

Genomic Sequence

> **ONAC134**

ATTCACGCGAACTCGAGCCCCACACATATATATACACATCCCAAGATCACAAATCGAGT

GTAATTAAATTTGTGATTGTGAACCTTCTTCAATTCTACCTAGCTAGCAATCTATTGAG  
 AGGTGAATTGAAGTGCATGCATACAAGAATATATAGATGGTGATGAGCGGCGGCGGCGGCGG  
 GGCGCGAGGATTGTCAGTGATCCGGCGGCGACGCCGGGTTCCGATTCTACCCGACGGAG  
 GAGGAGCTGATCGGCTTCTACCTCCGCCACCGCCTCGCCGGCACGAGGGCCGACGACGTC  
 GCCCCGCTCATCCCCGTCGTCGACGTCTACGGCTACCATCCTTCCCAGCTCGCCGCCATG  
 GCCGGGTGGCGACCGCGGGGACAGGGAGCAGTGGTTCTTCTTCTGCCCCGAGGGCGGAG  
 CGGGAGCTCCACGGCGGCAGGCCGGCGCGGACCACGCCGTCGGGCTACTGGAAGGCCACG  
 GGCTCGCCGTCCTTCGTCTTCTCCTCCTCCGCCGCCGCCGCCAGGGTCATCGGCGTC  
 AAGCGCACCATGGTCTTCTACCAGGGCCGCGCCCCCTCCGGCACCAAGACCAGGTGGAAG  
 ATGAACGAGTACAAGGCCGTCGCCGCCGCCGCCGCCGACGACGACCACAACGCCGCTGGC  
 GTGGCCGTGCAGCTGCCACCAATGGCGCCGCCGCCGTCGTCCTCCGCGTGCGTGCGGCTG  
 AGGAACGAGCTGAGCGTGTGCCGGGTGTACGTCAGCACCGGCACGCTCCGATCCTTCGAC  
 CGCCGCCCCCTCGACGCGCCCCCGGTGATCAGCCACCATCAACCTCAGCTCCAGCAACAA  
 CAACGTCAGCTGCCATCGTCGGCAGCGGCGGCGGCGACGAACGGCAACCTCATCGCCCTC  
 GCCGGCGGGTACGAGTGCTCACACGACAGCTCCGGTGGCTCGTCGGAAGATGCCGCCATC  
 GACTGGAGCTCGCTGATTACCGCCGCCACCGATTCCGCTACCGCCGCCGTTGATTTACG  
 TTCAACGACGACATCGATTTACGCCCTGCCGCTGTTGGCCCATGGGCGCCACAGCTTTGA  
 TTGATTGATTATTTGTGCACACTGCATAATAACTGAATTACTAGTAATTAGTAGTAGTAA  
 GTTTGATCAGTGCTTGCTAATTGCCATAGTGTTCTATGTTCAAGTCAACTCGATTGATTT  
 ATTACCTCCCAAATCTCAATTCTGCTTGTCTTTAATTTTTCTTGAATAAATTCTGAACT  
 ATGGCCTGTTCTTTTCTTACGAAGA

---

CDS

> **ONAC134**

ATGGTGATGAGCGGCGGCGGCGGCGGCGGCGGAGGATTGTCAGTGATCCGGCGGCGACGCCG  
 GGGTTCCGATTCTACCCGACGGAGGAGGAGCTGATCGGCTTCTACCTCCGCCACCGCCTC  
 GCCGGCACGAGGGCCGACGACGTGCCCCGCTCATCCCCGTCGTCGACGTCTACGGCTAC  
 CATCCTTCCCAGCTCGCCGCCATGGCCGGGTGGCGACCGCGGGGACAGGGAGCAGTGG  
 TTCTTCTTCTGCCCCGAGGGCGGAGCGGGAGCTCCACGGCGGCAGGCCGGCGCGGACCACG  
 CCGTCGGGCTACTGGAAGGCCACGGGCTCGCCGTCCTTCGTCTTCTCCTCCTCCGCCGCC  
 GCCGCCGCCAGGGTCATCGGCGTCAAGCGCACCATGGTCTTCTACCAGGGCCGCGCCCCC  
 TCCGGCACCAAGACCAGGTGGAAGATGAACGAGTACAAGGCCGTCGCCGCCGCCGCCGCC  
 GACGACGACCACAACGCCGCTGGCGTGGCCGTGCAGCTGCCACCAATGGCGCCGCCGCCG  
 TCGTCCTCCGCGTGCGTGCGGCTGAGGAACGAGCTGAGCGTGTGCCGGGTGTACGTCAGC  
 ACCGGCACGCTCCGATCCTTCGACCGCCGCCCCCTCGACGCGCCCCCGGTGATCAGCCAC  
 CATCAACCTCAGCTCCAGCAACAACAACGTCAGCTGCCATCGTCGGCAGCGGCGGCGGCG  
 ACGAACGGCAACCTCATCGCCCTCGCCGGCGGGTACGAGTGCTCACACGACAGCTCCGGT  
 GGCTCGTCGGAAGATGCCGCCATCGACTGGAGCTCGCTGATTACCGCCGCCACCGATTCC  
 GCTACCGCCGCCGTTGATTTACGCTTCAACGACGACATCGATTTACGCCCTGCCGCTGTT  
 GGCCCATGGGCGCCACAGCTTTGA

---

Protein

> **ONAC134**

MVMSGGGGGARIVSDPAATPGFRFYPTTEELIGFYLRHRLAGTRADDVARVIPVVDVYGY  
HPSQLAAMAGVATAGDREQWFFFCPRAERELHGGRPARTTPSGYWKATGSPSFVFSSSAA  
AAARVIGVKRTMVFYQGRAPSGTKTRWKMNEYKAVAAAAADDDHNAAGVAVQLPPMAPPP  
SSSACVRLRNELSVCRVYVSTGTLRSFDRRPLDAPPVISHHQPQLQQQRQLPSSAAAAA  
TNGNLIALAGGYECSDSSGGSSEDAIDWSSLITAATDSATAAVDFSFNDDIDFSPA  
AVGPWAPQL\*

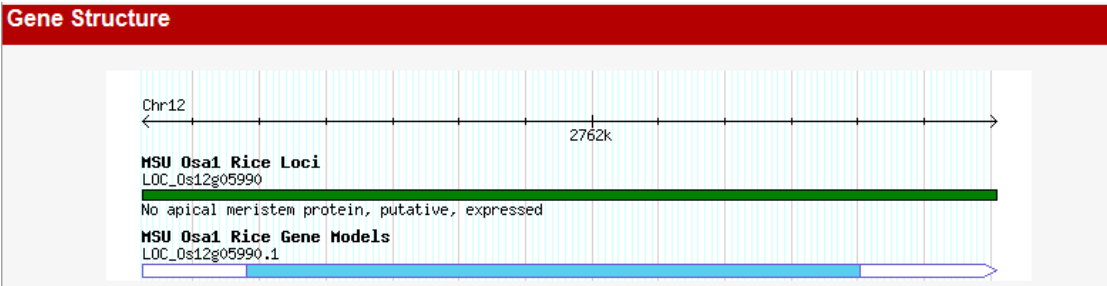

**LOC\_Os12g07790 (ONAC135) sequence information**

**Genomic sequence length:** 1716 nucleotides

**CDS length:** 1716 nucleotides

**Protein length:** 571 amino acids

**Putative Function:** no apical meristem protein, putative

Genomic Sequence

> **ONAC135**

ATGGACGTGGACCCCTCCTCCTCCGCTGCCGCCGCCACCGCCACCGCCACCGCCCGCGCG  
ACGCCGCAGCAGAACAAGGCGGTGGAGCTTCTCCCGCGGTATACTTCAACCCGACGCGT  
GAGGAGGCCATGCACCACTACCTCAACCGGTGGATCGCCGGAAGACGATACCGGAGATG  
GAGGCCGGGTTCGTCGCCGCGCGGACGTCTACGGCGACGGCCCCGACGCGCTGCGGCGG  
CGGCACCGGCCGGGATACTGGTGCAACTGCGTGTACAAGTGGTTCTTCTTTGCCACCGC  
AAGCGCCAGAGCTCGCGCAGGACCACCGGCAACAAGCGCGCCGAGCGCGTCGTCGCCGCC  
GGTGGGCGGTGGAAGGTGGAGCAGGGGAAGAAGGTGCTCGGCGGCGGCGGCGGCGGCGG  
GAGAGGGACAGCTTAGGGTTCTACTCCAGTAACTCCACGAAGAAGACGTCATGGATTATG  
GAGGAGTACACGAGCTCCGCCGCTGATGGCGCGCGCGCGCGCGGCGAGGAGGACAGA  
ATGGAGCCCGTGCTCTGCAAGATCTACCTCTCGCCGCGCGCCCCCGCGGCGAGAAGCGG  
GCGCTGTTCCGGGAGGACGGCGTGGCGGTGGGCCCCGACGGACGCAAGAGGAACGCCCGG  
GTGACGGTTCTGGCGACACTGTTTCGACGACGTGCGCGCACTCCTTGGACAGCCGGTCGCC  
GCGCCGCCGCTGCCGCGCCAGGCGAACAGCTTGGCCATGGCCATGGCCATTTTCGATGAT  
GTAGCGGCTCGTTTCGGACAGGTCGCCGTGGCGGCGCTGCCGCGCTCGGGCGATCTTGGC  
CACGGCGATTTTCGATGACGACGCCGCGGCCCTCCTTGGACAGGTGCGCATGGCGCCGGCG  
CCGGCGCCGGGACATCACCAACAGGGTTATGTCGTCGCGGAGGCGCCGCTGCCGAGTCA  
GGTTATCTTGGCCATTATCACACGACGGCCATCTCGCGCAGGCGGCGGCGGCGCGCGGAG  
CAAGATCATTATCTTGGCTATCACAGTCACGACGCGCATGTCGTGGACGCGGAGGCGACG  
CCGGAGCAAGGCTATCATGACGACGCGCATGTCGCGGTGGCGCCGGCGCGGAGCAAGGC  
GATCTTGGCCATGACCAGGGGCATCTCGCGGCGGCGTACGCCGAGGAATGTGGCGAG  
ATAGTTGGCGCATACGAATTTACCCCGAAATGGTGCAGATGCTGTCCATTGGCTTCGCC

GCGCCCGACGAACAGTTGTTGCCGACGTGCTAGACCCACCGGCGGCGGCTACGACATG  
 GCTAGCTCCGCCATCGCCGCCGTTGGCGACGTGAACGCATATGCCGCCGCGGCGCCACG  
 CCGCGAATTAGACCCAACGCGGCGGAGGCAATGGCGGCGACGGCGACGGCAGAGACAATG  
 CCACCACCGCTGGACGCCGTGGCGGCCGAGCTATCCGCGCCGCCGCTGGCTTACCGCCG  
 GAGCTCGCTTTCAGTGCCTTGCCGTCCGTGCAGCAGGAGCCATCCTGTGACGACGGCGAC  
 AACTTCGGCGAGCTCGTGGCGGAGGCGATGCCGCCGTTGATCGGGGAGAACGCCGGCGTC  
 GATGCCGGCAGCGACGAGCCTCTGCCGATTTGGCCGGCATCATGACGGAGTTGGATTTT  
 GGACATGACTTTTTTCAGCAATCAGCACAGAGAATGA

CDS

> **ONAC135**

ATGGACGTGGACCCCTCCTCCTCCGCTGCCGCCGCCACCGCCACCGCCACCGCCGCCGGCG  
 ACGCCGCAGCAGAACAAGGCGGTGGAGCTTCCCTCCCGCGTATACTTCAACCCGACGCGT  
 GAGGAGGCCATGCACCACTACCTCAACCGGTGGATCGCCGGCAAGACGATACCGGAGATG  
 GAGGCCGGGTTTCGTCGCCGGCGCCGACGTCCTACGGCGACGGCCCCGACGCGCTGCGGCGG  
 CGGCACCGGCCGGGATACTGGTGCAACTGCGTGTACAAGTGGTTCTTCCTTTGCCACCGC  
 AAGCGCCAGAGCTCGCGCAGGACCACCGGCAACAAGCGCGCCGAGCGCGTCGTCGCCGCC  
 GGTGGGCGGTGGAAGGTGGAGCAGGGGAAGAAGGTGCTCGGCGGCGGCGGCGGCGGCGGG  
 GAGAGGGACAGCTTAGGGTTCTACTCCAGTAACTCCACGAAGAAGACGTCATGGATTATG  
 GAGGAGTACACGAGCTCCGCCGCTGATGGCGCCGCCGCCGCCGCGGCGAGGAGGACAGA  
 ATGGAGCCCGTGCTCTGCAAGATCTACCTCTCGCCGCGCGCCCCGCCGGCGAGAAGCGG  
 GCGCTGTTCTGGGGAGGACGGCGTGGCGGTCTGGGCCCCGACGGACGCAAGAGGAACGCCCGG  
 GTGACGGTTCTGGCGACACTGTTCTGACGACGTCGCGGCACTCCTTGGACAGCCGGTCGCC  
 GCGCCGCCGCTGCCGGCGCCAGGCGAACAGCTTGGCCATGGCCATGGCCATTTTCGATGAT  
 GTAGCGGCTCGTTTCGGACAGGTTCGCCGTGGCGGCGCTGCCGGCGTCGGGCGATCTTGGC  
 CACGGCGATTTTCGATGACGACGCCGCGGCCCTCCTTGGACAGGTTCGCCATGGCGCCGGCG  
 CCGGCGCCGGGACATCACCAACAGGGTTATGTCGTCGCGGAGGCGCCGCTGCCGGAGTCA  
 GGTATCTTGGCCATTATCACACGACGGCCATCTCGCGCAGGCGGCGGCGGCGCCGGAG  
 CAAGATCATTATCTTGGCTATCACAGTCACGACGCGCATGTCGTGGACGCGGAGGCGACG  
 CCGGAGCAAGGCTATCATGACGACGCGCATGTCGCGGTGGCGCCGGCGCCGGAGCAAGGC  
 GATCTTGGCCATGACCAGGGGCATCTCGCGGCGGCGCTGACCGCGGAGGAATGTGGCGAG  
 ATAGTTGGCGCATACGAATTTACCCCGAAATGGTGCAGATGCTGTCCATTGGCTTCGCC  
 GCGCCCGACGAACAGTTGTTGCCGACGTGCTAGACCCACCGGCGGCGGCTACGACATG  
 GCTAGCTCCGCCATCGCCGCCGTTGGCGACGTGAACGCATATGCCGCCGCGGCGCCACG  
 CCGCGAATTAGACCCAACGCGGCGGAGGCAATGGCGGCGACGGCGACGGCAGAGACAATG  
 CCACCACCGCTGGACGCCGTGGCGGCCGAGCTATCCGCGCCGCCGCTGGCTTACCGCCG  
 GAGCTCGCTTTCAGTGCCTTGCCGTCCGTGCAGCAGGAGCCATCCTGTGACGACGGCGAC  
 AACTTCGGCGAGCTCGTGGCGGAGGCGATGCCGCCGTTGATCGGGGAGAACGCCGGCGTC  
 GATGCCGGCAGCGACGAGCCTCTGCCGATTTGGCCGGCATCATGACGGAGTTGGATTTT  
 GGACATGACTTTTTTCAGCAATCAGCACAGAGAATGA

Protein

> **ONAC135**

MDVDPPPPPLPPPPPPPPPPATPQQNKAVELPPGVYFNPTREEAMHHYLNRWIAGKTIPEM

EAGFVAGADVYGDGPDALRRRHRPGYWCNCVYKWFFLCHRKRQSSRRTTGNKRAERVVAA  
 GGRWKVEQGGKVLGGGGGGGERDSLGFYSSNSTKKT SWIMEEYTSSAADGAAAARGEEDR  
 MEPVLCKIYLSRAPAGEKRALFGEDGVAVGPDGRKRNRVTVLATLFDDVAALLGQPVA  
 APPLPAPGEQLGHGHGHFDDVAARFGQVAVAALPASGDLGHGDFDDDAALLGQVAMAPA  
 PAPGHHQQGYVVAEAPLPESGYLGHYHHDGHLAQAAAPEQDHYLGYHSHDAHVVDAEAT  
 PEQGYHDDAHVAVAPAPEQGDLGHDQGHLLAAAL TPEECGEIVGAYEFHPEMVQMLSIGFA  
 APDEQLLPQLLDPTGGGYDMASSAIAAVGDVNAYAAAAPTPRIRPNAAEAMAATATAETM  
 PPPLDAVAAELSAPPRGLPPELAFSALPSVQQEPSCDDGDNFGELVAEAMPPLIGENAGV  
 DAGSDEPLPDLAGIMTELDFFGHDFFSNQHRE\*

#### Gene Structure

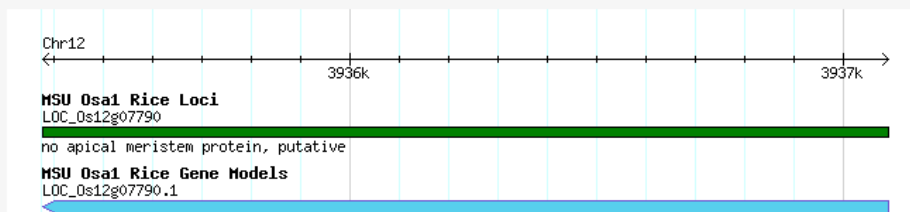

#### LOC\_Os12g22630 (ONAC136) sequence information

**Genomic sequence length:** 1413 nucleotides

**CDS length:** 1413 nucleotides

**Protein length:** 470 amino acids

**Putative Function:** retrotransposon protein, putative, unclassified, expressed

#### Genomic Sequence

##### > ONAC136

ATGGCGACCAACCTCCACCTTCTCCTCGAGCTAGGATTCCGCTTCAACCCCTCACC GGAG  
 GAGGTCGTCACCTACTACCTCCCACGCCTCATTGCCGGCCACCCGCCAAGGACACCGAG  
 TCCTGCATCCACCGAGCCAATGTCTACGGCGCCGAGCCAGGGAGCTCGCAGCCCAGTTC  
 GCGCCCGTGGCGAGGAGCTCCAATGGCGACCGGTTCTTCTTAACCGAGTGCAAGCGGATC  
 AAGGGGAAGGTCTCTCGCGTCGCAGGCGGTGGCAGCTGGGTCTCTCAGACCAGCAAGGAT  
 ATCAAGAACAGGGAGGGGATCAAGGTGGGGAAGCCAAGAATTTCCGCTTCAAGAAAGAT  
 GGCACGAACACGGATTGGTTGATGGAGGAGTACCACCTCTGCCTCCGACAAGCCAGCGAT  
 CTCGAGCCCGTCTCTGCCGGGTGTACGTCTCTCCAGGGCGGCCAAAGATTTCGGCGGCG  
 CACCAAGAATCCGCCGCTCTACGCCCCAAGAACCTGCGCCCGCGCTGGCTCATGCTCCC  
 GCACCGGCTCCGATTCAAGAACCAGCCGCTCTGCCTCGTCAAGAACTCGCGCCTGCGCCA  
 CCACGTCTCGAGGCCGTGATCACGCAGCAGCAAGCGACCATGAAGATGGGAGGTTCTGTC  
 CCGGCAAGCAAGGCGACGCGCCAGAGTTGCGTGACGGCGTCCGCGCCACCACCGCGACGT  
 GTGGCTCCGCAACCGGCACCTCCGTCACTGCGTACTGCACCGGCGGCTGTTGCGCCGCCA  
 CGGCAAGTGCCCGTGATCACGCAGCAGCAGGCGCCTCCCCTGAAGAGGCCCGCCCCGCCG  
 GTCCCCCTCGCCGCCGTGCGCCAAGAAGATCAGAGGACCTGTCTCGGCAAGCCCGGCGGCG  
 CGCCAGAGCTGCGTGCGGCATCCGCGCCGCCGCCATGGTGTGTGCTCCGCCCTCCGCGA  
 CCGGCACCACCGTCAAGGCGCGTCATGGCGCCACTGCCGCCTTATCCGATGGATCCGTTC  
 GAGACACCACCGTCGCTCATGCACCCAGGCATGATCCGTTTCGAGCCACCACCGTCGCT  
 GATCCACCCATCCAGAGCTATGCGATCGATCCACCCATCCAGAGCTATGCGATGGATCCA



TTCGAGCAACCGCCGTCGCCATACGCACCACATGGCGTTGATGACATGGACGAGTTTACG  
 AGATCGCTGGAAGCTCAGCTAGAAGAAGCCGATGGTGATGAAATTGCTGCAGCGACTGTT  
 GCTCCTCCCATGGCACAAAACGTTGCGCCCGATGACGACATGGACGAGTTTACGAGATCG  
 CTGGAAGCTCAGCTGGAAGAAGCAGATGGTGATGACAAGATTGATGATGATGAGATTGAC  
 GAGGAAATTTTCCAAATTCCGCTGAAGGACTAA

# CDS

## > ONAC136

ATGGCGACCAACCTCCACCTTCTCCTCGAGCTAGGATTCCGCTTCAACCCCTCACCGGAG  
 GAGGTCGTACCTACTACCTCCCACGCCTCATTGCCGGCCACCCGCCAAGGACACCGAG  
 TCCTGCATCCACCGAGCCAATGTCTACGGCGCCGAGCCCAGGGAGCTCGCAGCCCAGTTC  
 GCGCCCGTGGCGAGGAGCTCCAATGGCGACCGGTTCTTCTTAACCGAGTGCAAGCGGATC  
 AAGGGGAAGGTCTCTCGCGTCGCAGGCGGTGGCAGCTGGGTCTCTCAGACCAGCAAGGAT  
 ATCAAGAACAGGGAGGGGATCAAGGTCGGGGAAGCCAAGAATTTCCGCTTCAAGAAAGAT  
 GGCACGAACACGGATTGGTTGATGGAGGAGTACCACCTCTGCCTCCGACAAGCCAGCGAT  
 CTCGAGCCCGTCTCTGCCGGGTGTACGTCTCTCCAGGGCGGCCAAAGATTCCGGCGGCG  
 CACCAAGAATCCGCCGCTCTCACGCCCCAAGAACCTGCGCCGCCGCTGGCTCATGCTCCC  
 GCACCGGTCCGATTCAAGAACCAGCCGCTCTGCCTCGTCAAGAACTCGCGCCTGCGCCA  
 CCACGTCTCGAGGCCGTGATCACGCAGCAGCAAGCGACCATGAAGATGGGAGGTTCTGTC  
 CCGGCAAGCAAGGCGACGCGCCAGAGTTGCGTGACGGCGTCCGCGCCACCACCGCGACGT  
 GTGGCTCCGCAACCGGCACCTCCGTCACTGCGTACTGCACCGGCGGCTGTTGCGCCGCCA  
 CGGCAAGTGCCCGTGATCACGCAGCAGCAGGCGCCTCCCCTGAAGAGGCCCGCCCCGCCG  
 GTCCCCTCGCCGCCGTGCGCCAAGAAGATCAGAGGACCTGTCTCGGCAAGCCCGGCGGCG  
 CGCCAGAGCTGCGTGCGGGCATCCGCGCCGCCGCCATGGTGTGTGCCTCCGCCTCCGCGA  
 CCGGCACCACCGTCAAGGCGCGTCAATGGCGCCACTGCCGCCTTATCCGATGGATCCGTTC  
 GAGACACCACCGTCGCCTCATGCACCCAGGCATGATCCGTTTCGAGCCACCACCGTCGCCT  
 GATCCACCCATCCAGAGCTATGCGATCGATCCACCCATCCAGAGCTATGCGATGGATCCA  
 TTCGAGCAACCGCCGTCGCCATACGCACCACATGGCGTTGATGACATGGACGAGTTTACG  
 AGATCGCTGGAAGCTCAGCTAGAAGAAGCCGATGGTGATGAAATTGCTGCAGCGACTGTT  
 GCTCCTCCCATGGCACAAAACGTTGCGCCCGATGACGACATGGACGAGTTTACGAGATCG  
 CTGGAAGCTCAGCTGGAAGAAGCAGATGGTGATGACAAGATTGATGATGATGAGATTGAC  
 GAGGAAATTTTCCAAATTCCGCTGAAGGACTAA

# Protein

## > ONAC136

MATNLHLLLELGFRFNPSPEEVVTTYLPRLIAGHPPKDTESCIHRANVYGAEPRELAQF  
 APVARSSNGDRFFLTECKRIKGVSRVAGGGSWVSQTSKDIKNREGIKVGEAKNFRFKKD  
 GTNTDWLMEEYHLCLRQASDLEPVLCRVYVSPRAAKDSAAHQESAALTPQEPAPPLAHAP  
 APAPIQEPAALPRQELAPAPPRLEAVITQQQATMKMGGSVPASKATRQSCVTASAPPPRR  
 VAPQPAPPSLRTAPAAVAPPRQVPVITQQQAPPLKRPAPPVSPPCAkkIRGPVSASPAA  
 RQSCVAASAPPPWCVPppPRPAPPsRRVMAPLPPYMPDPFETPPSPHAPRHDPFEPPSP  
 DPPIQSYAIDPPIQSYAMPFEQPPSPYAPHGVDDMDEFTRSLEAQLEEADGDEIAAATV  
 APPMAQNVAPDDMDEFTRSLEAQLEEADGDDKIDDDIDEEIFQIPLKD\*

## Gene Structure

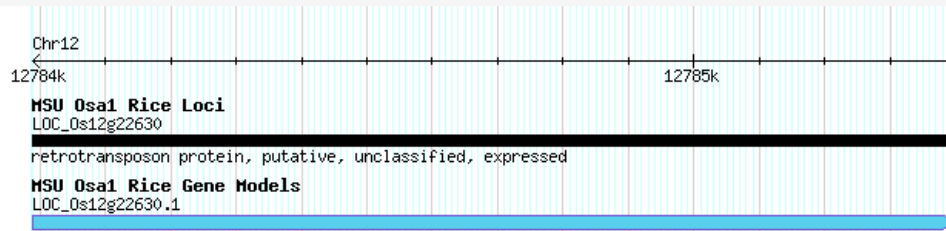

## LOC\_Os12g22940 (ONAC137) sequence information

**Genomic sequence length:** 1254 nucleotides

**CDS length:** 1254 nucleotides

**Protein length:** 417 amino acids

**Putative Function:** no apical meristem protein, putative

## Genomic Sequence

## &gt; ONAC137

```

ATGGAGAAAGGCAAGCTCGATTTCCTCCTCGAGCTAGGGTTTCGCTTCAACCCGTCGCCG
GAGCAGGTCGTCACCTACTACCTGCCATGCCTCGTCGCCGGCCAGCAGCCCAAGGACACC
GAGGGGTGCATCCACAGCGCCGACGTCTACGGCGCCGACGAGCCCAGGGACCTCGCCGGC
AAGTACGCGCCCGTGGCCAGGAGCTCCAACGGCGACCGGTTCTTCTTACCGGTTGCAAG
CGGATGAAAGGGAAGTTCTCCCGCTCCGCCGGGGGTGGCACCTGGGTCTCTCAGTCCAGC
AAGGATCTCAAGAACAGGGAGGGGATCAAGATCGGCGAGGTCAAGAACTCCGCTTCAAG
AAAGATGGCAAGAACACGGATTGGTTGATGGAGGAGTATCACCTCTGCGGGCAAGAATCC
GGTGATGTTGTGCGAGCCCGTCGTCTGCCGGATTTACGTCTCCCCTAGGGCTGCTCCTGAT
TCGGTGGCGCACCAAGAATCAGCTGTCTGACGCTCAAGAACCCGCGCCGCTGCCGGTT
CCTGCAGCACCAGCGCCGCCACGACAAGTGCCCGTGGTCACGCAGCAAGCGCCGCCGCCG
CCGCCACCACTTGTTCGGTGATCACGCAGGACGCGCCGCCCTGAAGAGGCCCGCGCCG
GTCGCCGCGCCGCCGTGCGCCAAGAAGATGAGAGGCGATGTCTCGGCATTCCCTGTGGTG
CGCCAGAGCTGCGTGCGGGCGCCGCGATGTGCGCCACGCGTCGTGGCACCACCGCCGCGT
CATCCACCCATCCAGACCTATCCGACGGATCCGTTTCGAGTCAGCGCCGCTGGATCCGTTT
GAGCCGCCGCCAGCAGCTGCCTCGGTGACCGCGGACACCACACGCTCAGCCGTCTGTC
CCTGTCCCTGCGACGCCAGAGCAAGGGTTTTCACTGGCAGCTTCCAATAGTCCAGAACTC
GATCCGGCTAACATCGGCATTGACATGGACGAGCTTATGAGATATCTGGGCAATACACCA
TTGGACGGCGTTCTCCCTTCCCAGCTATTTGTTCTGCCACCAACGACGATGAAGACGTC
GAGCTCGCCAAAGTACTAGAGGACGGGCTACAAGGAGGAGGAGACGGCAATGGCAATCC
ACCGCTGTGTGTGACTCCTCCTCCTCCGCGACCGGCATCTTGGCCCGTCATGGCGCCACC
GCCGCTCATCCACCCATCCTGACCTGTCCCAAGGATCCGTTTCGAGCCCAATGA

```

## CDS

## &gt; ONAC137

```

ATGGAGAAAGGCAAGCTCGATTTCCTCCTCGAGCTAGGGTTTCGCTTCAACCCGTCGCCG
GAGCAGGTCGTCACCTACTACCTGCCATGCCTCGTCGCCGGCCAGCAGCCCAAGGACACC

```

GAGGGGTGCATCCACAGCGCCGACGTCTACGGCGCCGACGAGCCCAGGGACCTCGCCGGC  
AAGTACGCGCCCGTGGCCAGGAGCTCCAACGGCGACCGGTTCTTCTTACCGGTTGCAAG  
CGGATGAAAGGGAAGTTCTCCCGTCCGCGGGGGTGGCACCTGGGTCTCTCAGTCCAGC  
AAGGATCTCAAGAACAGGGAGGGGATCAAGATCGGCGAGGTCAAGAACTCCGCTTCAAG  
AAAGATGGCAAGAACACGGATTGGTTGATGGAGGAGTATCACCTCTGCGGGCAAGAATCC  
GGTGATGTTGTCGAGCCCGTCGTCTGCCGATTACGTCTCCCCTAGGGCTGCTCCTGAT  
TCGGTGGCGCACCAAGAATCAGCTGTCCTGCAGCCTCAAGAACCCGCGCCGCTGCCGGTT  
CCTGCAGCACCAGCGCCGCCACGACAAGTGCCCGTGGTCACGCAGCAAGCGCCGCCGCCG  
CCGCCACCACTTGTTCGGGTGATCACGCAGGACGCGCCGCCCTGAAGAGGCCCGCGCCG  
GTCGCGCGCGCCCGTGCGCCAAGAAGATGAGAGGCGATGTCTCGGCATTCCCTGTGGTG  
CGCCAGAGCTGCGTGGCGGCGCCGCGATGTGCGCCACGCGTCGTGGCACCACCGCCGCGT  
CATCCACCCATCCAGACCTATCCGACGGATCCGTTTCGAGTCAGCGCCGCTGGATCCGTT  
GAGCCGCCGCCAGCAGCTGCCTCGGTGACCGGCGGACACCACACGCCTCAGCCGTCTGTC  
CCTGTCCCTGCGACGCCAGAGCAAGGGTTTTCACTGGCAGCTTCCAATAGTCCAGAACTC  
GATCCGGCTAACATCGGCATTGACATGGACGAGCTTATGAGATATCTGGGCAATACACCA  
TTGGACGGCGTTCTCCCTTCCAGCTATTTGTTCTGCCACCAACGACGATGAAGACGTC  
GAGCTCGCCAAAGTACTAGAGGACGGGCTACAAGGAGGAGGAGGACGGCAATGGCAATCC  
ACCGCTGTGTGTGACTCCTCCTCCTCCGCGACCGGCATCTTGGCCCGTCATGGCGCCACC  
GCCGCTCATCCACCCATCCTGACCTGTCCCAAGGATCCGTTTCGAGCCCAATGA

Protein

> **ONAC137**

MEKGKLDLLELGLFRFNPSPEQVVITYYLPCLVAGQQPKDTEGCIHSADVGADEPRDLA  
KYAPVARSSNGDRFFFTGCKRMKGKFSRSAGGGTWVSQSSKDLKNREGIKIGEVKNFRFK  
KDGKNTDWLMEEYHLCGQESGDVVEPVVCRIVSPRAAPDSVAHQESAVLQPQEPAPLPV  
PAAPAPPRQVPVVTQQAPPPPPPLVPVITQDAPPLKRPAPVAAPPCAKKMRGDVSAFPV  
RQSCVAAPRCAPRVVAPPPRHPIQTYPTDPFESAPLDPFEPPPAASVTGGHHTPQPSV  
PVPATPEQGFSLAASNSPELDPANIGIDMELMRYLGNTPLDGVLPSQLFVLPTNDDVDV  
ELAKVLEDGLQGGGGRQWQSTAVCDSSSATGILARHGATAASSTHPDLSQGSVRAQ\*

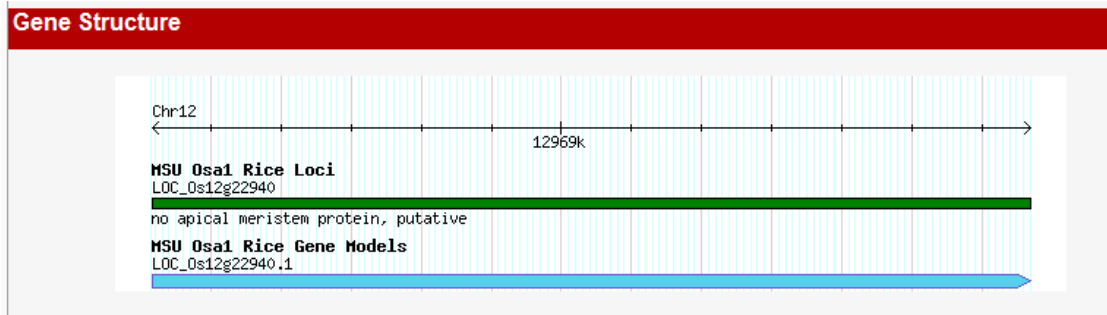

**LOC\_Os12g23090 (ONAC138) sequence information**

**Genomic sequence length:** 1388 nucleotides

**CDS length:** 1215 nucleotides

**Protein length:** 404 amino acids

**Putative Function:** no apical meristem protein, putative

## Genomic Sequence

> **ONAC138**

ATGGCCAGCCTCGATCTTCTCCTCAAGCTAGGGTTTCGCTTCAACCCGTCTCAGGAGGAG  
 GTCATCACCTACTACCTGCCACGGCTCATCGCCGGCCACCCGCCAAGGACACCGAGGGG  
 TACATCCACCGCGCTGACGTCTACGGCGCCGACGAGCCCAGGGACCTCGCCGGCAAGTAC  
 GCGCCCGTGCGAGGAGCCCCAATGGCGACCGGTTCTTCTTCACCGGTTGCAAGCGGGTC  
 AAAGGGAAGTTCTCCCGCTCCGCCGGGGGTGGCACCTGGGTCTCGCAGTCCAGCAAGGAT  
 CTCAAGAACAGGGAGGGCATCAAGATCGGCGAGGTCAAGAACTTCCGCTTCAAGAAAGGT  
 GGCAACAACACGGATTGGTTGATGGAGGAGTATCACCTCTGCGGGAAAGAAGCCGGTGGT  
 GTCGTGAGCCCCGTGCTCTGCCGATTTACGTCTCCCCGAGGGCGGCTCCTGATTCGGTG  
 GCGCACCAAGAATCAGCCGCCCTGCCGCCCTCAAGAACTCGTGCCGCCGCCCAAGAA  
 CTCGCGCCGCCCGCTATCCTGCAGCACAGGCGCGCCGCAAGCTCCTGCGCCGCCACGA  
 CAAGTGCCCGTGATCACGCAGCAGCAGGCGCCGCCCCAGAAGAGGCCCGCCGCGCCGGTC  
 GCCGAGCCGCCGTGCGCCACCAAGAAGATGAAAGGCGCTGTCTCGGCAAAACCAATGGCG  
 CCGCAGAGCAGCGTGACGGCGTCCGCGGCGCCACCCCGGTGTGCCGTGGCGCCATCGCAG  
 CATCATCCACCATTCAGACCTACCCGACGGACCCGTTTCGAGCCACCGGCGCCAGCTGCC  
 TCGGTGACTCAGCCGTCTGTCCCTGCGACGCCAGAGCAAGGCCCTGCTTATGTACCCGAT  
 CCGGCTGACATCGGCATGGAATGGACGAGCTTATGAGCTTCCTGGACAGTATACCAGTC  
 GACGGCATCTCCCTTCCCAGTATATGAATACGACGAGCTCGCCAAAGAACTGGAGGAC  
 GCGCTACAAGGAGGAGGAGAAGAGGACGGCAATGACAATCCACCGCGGTGTGCGACTCCT  
 CCTCTCCGCGACCGGCATCTTGCCCCGCATGGCGCCACCGCCGCCCTCATCCACCC  
 ATCTTGACCTTTCCCAAGGATCCGTTTCGAGACCAACGAAGAAGACGAGGGCGAGGACGAT  
 TTTGCGAGCATGCTAAGAGGCCATGTGTTTCGCTCCTTCAGTCGTGCGGAAGAGGTGGAT  
 GTGACAAGCAGTCGAGGGGGGCTACCGTGTGCTTCTGAAGGACATGGGCGACGATCAAA  
 TTGACCAACAGTGGCTGAAGGTGTCTCTGAAAGACTACCACCATCTGATGAAGAGCTGTA  
 AATTGTAG

## CDS

> **ONAC138**

ATGGCCAGCCTCGATCTTCTCCTCAAGCTAGGGTTTCGCTTCAACCCGTCTCAGGAGGAG  
 GTCATCACCTACTACCTGCCACGGCTCATCGCCGGCCACCCGCCAAGGACACCGAGGGG  
 TACATCCACCGCGCTGACGTCTACGGCGCCGACGAGCCCAGGGACCTCGCCGGCAAGTAC  
 GCGCCCGTGCGAGGAGCCCCAATGGCGACCGGTTCTTCTTCACCGGTTGCAAGCGGGTC  
 AAAGGGAAGTTCTCCCGCTCCGCCGGGGGTGGCACCTGGGTCTCGCAGTCCAGCAAGGAT  
 CTCAAGAACAGGGAGGGCATCAAGATCGGCGAGGTCAAGAACTTCCGCTTCAAGAAAGGT  
 GGCAACAACACGGATTGGTTGATGGAGGAGTATCACCTCTGCGGGAAAGAAGCCGGTGGT  
 GTCGTGAGCCCCGTGCTCTGCCGATTTACGTCTCCCCGAGGGCGGCTCCTGATTCGGTG  
 GCGCACCAAGAATCAGCCGCCCTGCCGCCCTCAAGAACTCGTGCCGCCGCCCAAGAA  
 CTCGCGCCGCCCGCTATCCTGCAGCACAGGCGGCGCCGCAAGCTCCTGCGCCGCCACGA  
 CAAGTGCCCGTGATCACGCAGCAGCAGGCGCCGCCCCAGAAGAGGCCCGCCGCGCCGGTC  
 GCCGAGCCGCCGTGCGCCACCAAGAAGATGAAAGGCGCTGTCTCGGCAAAACCAATGGCG  
 CCGCAGAGCAGCGTGACGGCGTCCGCGGCGCCACCCCGGTGTGCCGTGGCGCCATCGCAG  
 CATCATCCACCATTCAGACCTACCCGACGGACCCGTTTCGAGCCACCGGCGCCAGCTGCC

TCGGTGACTCAGCCGTCTGTCCCTGCGACGCCAGAGCAAGGCCCTGCTTATGTACCCGAT  
 CCGGCTGACATCGGCATGGAATGGACGAGCTTATGAGCTTCCTGGACAGTATACCAGTC  
 GACGGCATCCTCCCTTCCCAGCTATATGAATACGACGAGCTCGCCAAAGAACTGGAGGAC  
 GCGCTACAAGGAGGAGGAGAAGAGGACGGCAATGACAATCCACCGCGTCGTCGCGGAAGA  
 GGTGGATGTGACAAGCAGTCGCGAGGGGGGCTACCGTGTGCTTCTGAAGGACATGGGCGAC  
 GATCAAATTGACCAACAGTGGCTGAAGGTGTCTCTGAAAGACTACCACCATCTGATGAAG  
 AGCTGTAAATTGTAG

#### Protein

#### > ONAC138

MASLDLLLKLGFNFNPSQEEVITYYLPRLIAGHPPKDTEGYIHRADVGADEPRDLAGKY  
 APVARSPNGDRFFFTGCKRVKGFSSRSAGGTTWVSQSSKDLKNREGIKIGEVKNFRFKKG  
 GNNTDWLMEEYHLCGEAGGVVEPVVCRIYVSPRAAPDSVAHQESAALPPPQELVPPQE  
 LAPPPYPAAQAAPQAPAPPRQVPVITQQQAPPQKRPAAPVAEPPCATKKMKGAVSAKMA  
 PQSSVTASAAPPRCAVAPSQHHPPFQTYPTDPFEPAPAAASVTQPSVPATPEQGPAYVPD  
 PADIGMEMDELMSFLDSIPVDGILPSQLYEYDELAKELEDALQGGGEEDGNDNPERRRGR  
 GGCDKQSQGGYRVLLKDMGDDQIDQQWLKVSLKDYHHLMKSKL\*

#### Gene Structure

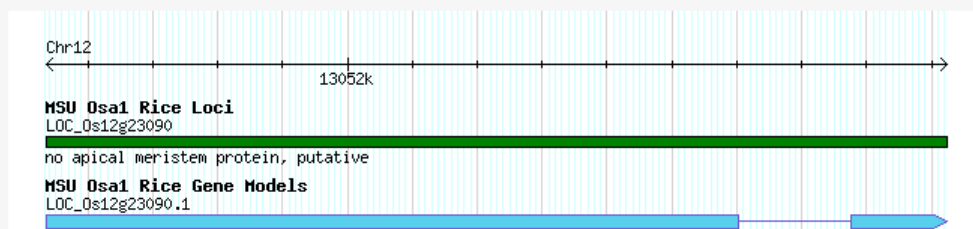

#### LOC\_Os12g29330 (ONAC139) sequence information

**Genomic sequence length:** 1391 nucleotides

**CDS length:** 783 nucleotides

**Protein length:** 260 amino acids

**Putative Function:** no apical meristem protein, putative, expressed

#### Genomic Sequence

#### > ONAC139

CCCCCGCTTACTCCCCGACACCCGCGACAAGCTCAGCTCGGCTAGGCCAAGACGGTG  
 GCGAGCGGCGGCGATCTGGTGCTCTGCTTGGGTTGAGTTCTTGATTTTGCCGAGGTGTAT  
 CGATGGAGACGACGGCGGCGAAGAAGCTGCCGCCGGGGTTCAGGTTTCAGGCCACCGACG  
 AGGAGCTTGTGGTGCACTACCTCCGCCGCCGCGCGCTCGGCTCCCCCTCTCCCGCCGCCG  
 TCGACATCCCCGATGTCCGCCTCCTCGCGCATGACCCCTCCGACCTGCTTCCTCCAGGTG  
 AGTCATGAGCCAGCTCGCCGCCGTCGCGCGGCGTCGTCGGAGTGTGGCCGGCCGGCGCTG

ACGAGGTCCCGTGCGTGCAGGGTGGAGTGAGCAGGAGAGGTACTTCTTCACGTGCAAGGA  
 GGCCAAGTATGTCAAGGGGCGCCGCGCCAACCGCGCCACGGGCGCCGGGTACTGGAAGGC  
 GACGGGGAAGGAGAAGCCGGTGGCGGTGTCCGTGGCGGCGGCGCCGAGGAGCCAGGCCG  
 CGCCGTCTGTCGTGGCATGAAGCGCTCCCTCGTGTCTACCGCGGAAGCCGCCGACCGG  
 CAAGAAGACGGAAGTGGTTCATGCACGAGTACCGCCTCGCCGGCGCCGGCCTCGCCCCGTG  
 CCGCCGCGCCGCCACCGCCGACCACCCGGCGCGCCCCGCCGAGGGCTGGGTGCTCTGCCG  
 CGTGTTCGCGAAGAAAGGCTCCGCGGCCGCGTCGACAGCCAGCCCCACCGCCGACGCCGA  
 CGACGACGACGCCACCACGGAGCGCGCCGACGACGCCGCGGCGGGCGTCCGGTTCATCGA  
 CTTCTTCGCCCCGCGCCGACGCGCGGCGGCGCCGCGCGGCGTCGCCGGTGTCTCGAGCTG  
 CGTGACGGATGCGTCGGCGGAGCATTGCAGGGAGCAGGAGACGACGAGCCGGAACGGCGG  
 CGCCGCGCCGGCGACGCCTCCGACTAAGCTAGGCAAGGCAAGCCTTGCAAGATTGTAGC  
 AAGAAAGAGGCAGGGTTAAGCTTTGTTTGTAAAGTTTGCTTAACGAAATCGCCCCAAAAA  
 AAAAAATGCAGGAGGACAAGACAGAGAGTAGCTCAAGAGTGTTCAAGTGTAGCTCAAGATCT  
 GTTAAACTAATGTATCTGATTTTTAATCTGCTGTTTTTTGTTTTGTGTTTTATTTACA  
 GTGCCACACGCAACCCGCGGTGCTCGTCCCAAATTCGGTGAGCTCAATCGAAATTCGCAT  
 TAAATTGGATTAGATTTTTTTTTTACAAAATTCAGTTTGACTTAAGTTGGTCCCAAGCAA  
 ATGTGTAAATTGTGATTTGTGGGAGATTCAGTTTGACACGTCCTAGGTTTTTTAATTCTA  
 AGAATCAATTT

CDS

> **ONAC139**

ATGGAGACGACGGCGGCGAAGAAGCTGCCGCCGGGGTTCAGGTTTCAGGCCACCGACGAG  
 GAGCTTGTGGTGCACTACCTCCGCCGCCGCGCGCTCGGCTCCCCCTCTCCCGCCCGCCGTC  
 GACATCCCCGATGTCCGCCTCCTCGCGCATGACCCCTCCGACCTGCTTCCTCCAGGGTGG  
 AGTGAGCAGGAGAGGTACTTCTTCACGTGCAAGGAGGCCAAGTATGTCAAGGGGCGCCG  
 GCCAACCGCGCCACGGGCGCCGGTACTGGAAGGCGACGGGGAAGGAGAAGCCGGTGGCG  
 GTGTCCGTGGCGGCGCGCCGAGGAGCCAGGCCGCCGCCGTCGTCTCGTCGTCATGAAGCGC  
 TCCCTCGTGTCTACCGCGGGAAGCCGCCGACCGGCAAGAAGACGGAAGTGGGTCATGCAC  
 GAGTACCGCCTCGCCGGCGCCGGCCTCGCCCCGTGCCGCCGCGCCGCCACCGCCGACCAC  
 CCGGCGCGCCCCGCCGAGGGCTGGGTGCTCTGCCGCGTGTTCGGAAGAAAGGCTCCGCG  
 GCCGCGTCGACAGCCAGCCCCACCGCCGACGCCGACGACGACGCCACCACGGAGCGC  
 GCCGACGACGCCGCGGCGGGCGTCCGGTTCATCGACTTCTTCGCCCCGCGCCGACGCGCGG  
 CGGCGCCGCGCGGCGTCGCCGGTGTCTCGAGCTGCGTGACGGATGCGTCGGCGGAGCAT  
 TGCAGGGAGCAGGAGACGACGAGCCGGAACGGCGGCGCCGCCGCGGCGACGCCTCCGAC  
 TAA

Protein

> **ONAC139**

METTAAKKLPPGFRFRPTDEELVVHYLRRRALGSPLPPAVDIPDVRLLAHDPDSDLPPGW  
 SEQERYFFTCKEAKYVKRRANRATGAGYWKATGKEKPVAVSVAAAPRSQAAAVVGMKR  
 SLVFYRGPPTGKKTDWVMHEYRLAGAGLAPCRRAATADHPPARPAEGWVLCRVFRKKGSA  
 AASTASPTADDDDDATTERADDAAGVRFIDFFARADARRRRAASPVSSSCVTDASAEH  
 CREQETTSRNGGAAAGDASD\*

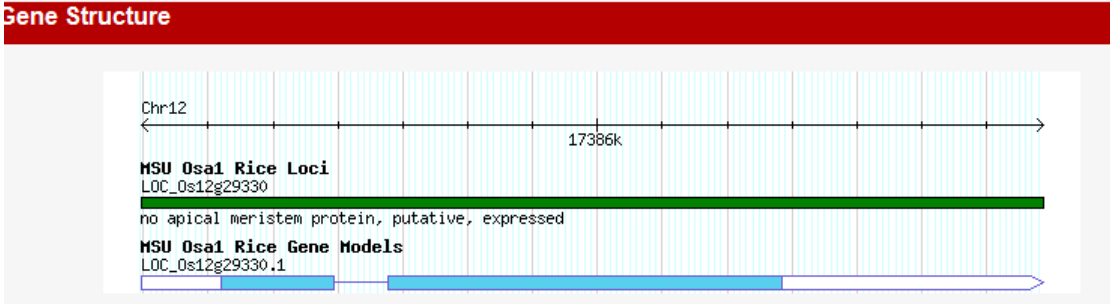

**LOC\_Os12g43530 (ONAC140) sequence information**

**Genomic sequence length:** 2031 nucleotides  
**CDS length:** 1128 nucleotides  
**Protein length:** 375 amino acids  
**Putative Function:** no apical meristem protein, putative

Genomic Sequence

> **ONAC140**

ATGGAGGAGGAGAAGAGGTTGGAAAAGGATTATTAAGGAGATTGACAGTCCAATTAGCCCA  
GGAGGAGGAGCAGCTTTATTAGCAGAAGATGATGATCTGGTGTTCAGGGTTTCGATTT  
CATCCGACGGATCAAGAGCTCGTGGGGTTTTATCTGACAAGGAAGGTGGAGAAGAAGCCT  
TTCAGTATTGACATCATCAAGGAGATCGATATCTACAAGCATGATCCCTGGGATCTTCCA  
AGTAGGTTACTTCAATTTTGTCTTAATTTTAAGAAAAAACTGGTGTACGTGCAAGTTA  
TGTTCTTAATTGATTTGAACATATCCACACATGTATACGCATCATTATATGTGCACTGAA  
AAGTAAGAGGGGATAAAATCAGGATTCAGGGCATGAAACCGTATTACTTTTCTGATCTCA  
TGTTCTTCCTTTGTGCATATCAATTAGTTCATCTTACTTTCAAGAAGATTATAAGAATAT  
GATGCAAGATATATTAATTGTGATACCAGAGGTTAAATTTTTGTGCACACTTGGTGGTGAA  
GGTTAATAATATGACTAGTATAGGCGAATCGTCATGCATGACTAATTATCTCCTGCAATT  
GAAACATTCATAAAATCATGCCTATGTGTCAATTTAAATTTAGTTGGTTCTGTAAGTAAA  
AAAAAAGGAAATTCAGTCATAAGTGGTAGTATATACTAGCTATCAGTTACAATTTGTAT  
CTCTGAATAATCCTCTCTGATCGATCGATCGTGAATAAAAAATTAACACTGAACAATTAA  
CACACAATCAGAGATTTGAGAGAATAATTGATATATATCAGCAAAGTCAGATAAAAATGA  
TGAACAACGAGCCATGCATGCATGCATATCAACCAAATTTCTAATGTTGTGCTTGTGAATG  
CAGAGGTGAGCCATGGCGCGGTGGCGCTGCAGGGCTCGTCGTCGTCGTCGTCGTTGTCTGA  
CGGCGGCGGCGGCGGAGAGAGTGGCGCTATTTCTTCTGCCTTCGAGGGAGGAAGTACA  
GGAACAGCATCCGCCCCAACCGCGTCACCGGCTCCGGCTTCTGGAAGGCCACCGGCATCG  
ACAAGCCAATCTACTCTTCTCACTCGCCGCCGCCGCCGCCGCCGGTGCCGGCGACT  
GCATTGGCCTCAAGAAGTCTCTCGTCTACTACCGCGGCAGCGCCGGTAAAGGCACCAAGA  
CAGATTGGATGATGCACGAGTTCCGACTCCCCCTCCATCTCCGACTCCGATCACCTCC  
AAGACGCATCAGTATGTCAGGTTTTTTTTCTGTAACACGCAAAAGATTGCACGTCAATATA  
TTAGAAGGAAAAAGATTTTTGATACACAACGCAATCGGCTAGACAGGCACATCATTGCGTC  
ACTAGCTAGCTAGCTTAATTAGCTACATCGATCGTCAGAATGATCTCTTATATATATATA  
CACCTTTAATTTGTTCTGAATTGAATTCATGGATAGTACTGGTCATGCATCATCTCGATC  
AATGGCATGCAGGAGACATGGACGATTTGCCGGATCTTCAAGAGGAGCATGACCTACACC  
AAGGGCAGGGCGGCGGCGGCAGCAGCATCCATGAACAAGCGAATTAGCCATGAGCTTCAG

CACATTCATCATCATCAGCAGCAGCAATTCTACTACCACGAGGTAGTCCATGACGGCCAT  
GGCCACCACCATCGTCGCCACCTGCAGCACTACGCCGGCAGCGCTTCCATGGCAGCGGCG  
GCGGCCAACATCGTCGACGTCATCGATCACTCGTCGGACGCCGAGACGACGACGAGGTCT  
CACTCTCACTCTCAGTCTCACCTCGTCGCTGACATTTCGTCATCGTCAGTCGCCGTTTCATG  
CTCGACTTCCATGCTGGGACGGCGTCGTCGTCGTCGTCGACGGCGGCGGGGTGGAGCGAG  
GTGATGAGCTTCAGTAGGGATGGCGGGAGCAGCAGCGGCAGTAGCTGGGACGAGCTGGGG  
AGGATCATGGATATCTCTACCAATTCTGCTAATAATAATTACTACTTGTA

CDS

> **ONAC140**

ATGGAGGAGGAGAAGAGGTTGGAAAGGATTATTAAGGAGATTGACAGTCCAATTAGCCCA  
GGAGGAGGAGCAGCTTTATTAGCAGAAGATGATGATCTGGTGTTCAGGGTTTCGATTT  
CATCCGACGGATCAAGAGCTCGTGGGGTTTTATCTGACAAGGAAGGTGGAGAAGAAGCCT  
TTCAGTATTGACATCATCAAGGAGATCGATATCTACAAGCATGATCCCTGGGATCTTCCA  
AAGGTGAGCCATGGCGCGGTGGCGCTGCAGGGCTCGTCGTCGTCGTCGTCGTTGTGACG  
GCGGCGGCGGCGGAGAAGGAGTGC GGCTATTTCTTCTGCCTTCGAGGGAGGAAGTACAGG  
AACAGCATCCGCCCAACCGCGTCACCGGCTCCGGCTTCTGGAAGGCCACCGGCATCGAC  
AAGCCAATCTACTCTTCTCACTCGCCGCCGCCGCCGCCGCCGGTGCCGGCGACTGC  
ATTGGCCTCAAGAAGTCTCTCGTCTACTACCGCGGCAGCGCCGGTAAAGGCACCAAGACA  
GATTGGATGATGCACGAGTTCCGACTCCCCCTCCATCTCCGACTCCGATCACCTCCAA  
GACGCATCAGAGACATGGACGATTTGCCGGATCTTCAAGAGGAGCATGACCTACACCAAG  
GGCAGGGCGGCGGCGGCAGCAGCATCCATGAACAAGCGAATTAGCCATGAGCTTCAGCAC  
ATTCATCATCATCAGCAGCAGCAATTCTACTACCACGAGGTAGTCCATGACGGCCATGGC  
CACCACCATCGTCGCCACCTGCAGCACTACGCCGGCAGCGCTTCCATGGCAGCGGCGGCG  
GCCAACATCGTCGACGTCATCGATCACTCGTCGGACGCCGAGACGACGACGAGGTCTCAC  
TCTCACTCTCAGTCTCACCTCGTCGCTGACATTTCGTCATCGTCAGTCGCCGTTTCATGCTC  
GACTTCCATGCTGGGACGGCGTCGTCGTCGTCGTCGTCGACGGCGGCGGGGTGGAGCGAGGTG  
ATGAGCTTCAGTAGGGATGGCGGGAGCAGCAGCGGCAGTAGCTGGGACGAGCTGGGGAGG  
ATCATGGATATCTCTACCAATTCTGCTAATAATAATTACTACTTGTA

Protein

> **ONAC140**

MEEKRLERI I KEIDSPISPGGGAALLAEDDDLVPFGFRFHPTDQELVGFYLTRKVEKKP  
FSIDI I KEIDYKHDPWDLPKVSHGAVALQGSSSSSLSTAAAAEKECGYFFCLRGRKYR  
NSIRPNRVTGSGFWKATGIDKPIYSSSLAAAAAAGAGDCIGLKKSLVYYRGSAGKGTKT  
DWMMEHFRLPSSISDSHLQDASETW TICRIFKRSMYTKGRAAAAAASMNKRISHLQH  
IHHHQQQFYFYEYVVDHGHGHHRRHLQHYAGSASMAAAAAANIVDVIDHSSDAETTTRSH  
SHSQSHLVADIRHRQSPFMLDFHAGTASSSSSTAAGWSEVMSFSRDGGSSSGSSWDELGR  
IMDISTNSANNYYL\*



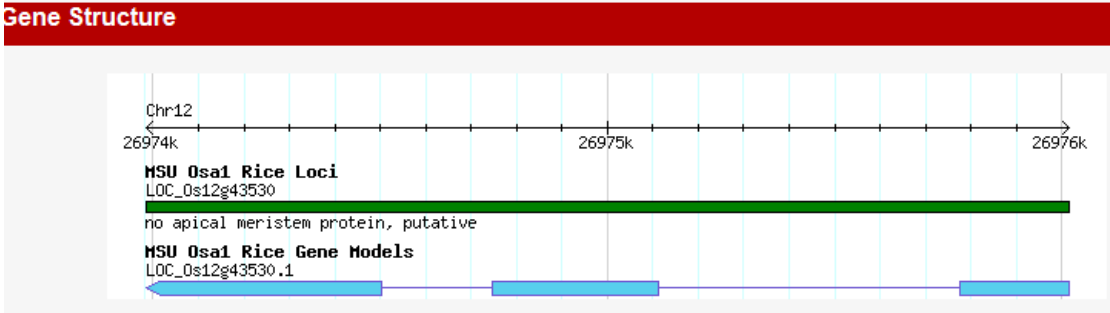

# **LOC\_Os01g47670 (ONAC141) sequence information**

**Genomic sequence length:** 1209 nucleotides

**CDS length:** 1095 nucleotides

**Protein length:** 364 amino acids

**Putative Function:** expressed protein

## > **ONAC141**

ATGGGTGCCGCTCCCGCCCCCGCCCAATGCAGGGCGCCGCGCCGTCTCGACGGCGGC  
 GGAGGCGGCAGCATGGACGTCCACCCCTCCGAGCTCCTCCCCCGCAGCCGCTGCACGGCG  
 CCGCGCCGCTGGACGACGACGAGATGGACGTCCACCCCTCCGAGCAGGAGCTCATCGAG  
 ACGTAGCTCCGCCCACGGGTCGTCTCCGGCGACAAGCCGCCGCCGTCTGTCGTCGTCGTCG  
 GGGTTCATCATCCACGAGGCGGACGTGTACTCCGCCGACCCCGCCGACCTCACGAGGGGG  
 TTCGCGCCGGCGGTGGCGAGGAGCAGCGGCGACGAGGCGTGGTACTTCTTCAGCGCCGTG  
 AGGGGGCTCAAGGGCGGCCGAAGGCGCGCACGGTGGACGACGGCGCCGGGTGCTGGCAC  
 TCGGAGGCCGGCGCAAGCCCGTGCTCGCCGCCTCCTCCGGCCGCCGCTGGGGCACCGG  
 CAGAGCTTCTCCTTCATCACCAAGGACGACGACGGCCAGCGCTCCGCTCCGGGTGGCTG  
 ATGGTGGAGCTCAGCCTCGACGTCGACGAAGAGGAGCAGCTGGTCCTGAGCAAGGTCTAC  
 TTCAGCCCGCGCGCGCCCGGCGCCAGGAAACCCACGACGGCGGCGGCGATGTCCCGCCAC  
 AAGAGGAAGCTGTCCACCACCGACATCGCCTCACCGCCGCGGCGCCAGAGACGCCACCGT  
 GTAGTACCATCATCTCCACCGGAGGAGCCGAACACGTCCCGGTCGCGGCGGCTGCGCCT  
 CCGGACCAGCAGGAAGGCGGCGACGACGACCCCGACCGCGGGAGCATTTCTGTGGTGGCTG  
 CGGAGGGTGTTCGGCCTGACCGCCACCTTTACCGAGGAGGAGTCCATCGAGCTCAACCCA  
 TGGCTGAAGGACATCCTGAGGCCGTTCGCCCTCCCTTGCCGCCGACGCCGCCGCTCCA  
 TGCCCGAGCCCTCGCCGAAGCTGATCGACATGCCGAGATCAGGGAGTTCATCATGCGC  
 GGGTCGTACCTCGGCGGTGGCCCTGCACCTCCGCGCTACGAGTGGGATCATCCGGCCATG  
 GTGATGACCGGCGGCGATGATCAGCAGCAGCTCGATGAGCAGCGCAGAGACGATGTTGGC  
 GATGATCGAGCTCATTACGATCGGGTGGACGGCCAGCTGCAGTTCGAACGGCACTACCTG  
 CAGTTGTAA

CDS

## > **ONAC141**

ATGGGTGCCGCTCCCGCCCCCGCCCAATGCAGGGCGCCGCGCCGTCTCGACGGCGGC  
 GGAGGCGGCAGCATGGACGTCCACCCCTCCGAGCTCCTCCCCCGCAGCCGCTGCACGGCG  
 CCGCGCCGCTGGACGACGACGAGATGGACGTCCACCCCTCCGAGCAGGAGCTCATCGAG  
 ACGGGGTTCGCGCCGGCGGTGGCGAGGAGCAGCGGCGACGAGGCGTGGTACTTCTTCAGC

GCCGTGAGGGGGCTCAAGGGCGGCCGAAGGCGCGCACGGTGGACGACGGCGCCGGGTGC  
TGGCACTCGGAGGCCGGCGGAAGCCCGTGCTCGCCGCCTCCTCCGGCCGCCGCTGGGG  
CACCGGCAGAGCTTCTCCTTCATCACCAAGGACGACGACGGCCAGCGCTCCGCTCCGGG  
TGGCTGATGGTGGAGCTCAGCCTCGACGTCGACGAAGAGGAGCAGCTGGTCCTGAGCAAG  
GTCTACTTCAGCCCCGCGCGCGCCCGGCCAGGAAACCCACGACGGCGGCGGCGATGTCC  
CGCCACAAGAGGAAGCTGTCCACCACCGACATCGCCTCACCGCCGCGGCGCCAGAGACGC  
CACCGTGTAAGTACCATCATCTCCACCGGAGGAGCCGAACACGTCCCCGTCGCCGGCGGCT  
GCGCCTCCGGACCAGCAGGAAGGCGGCGACGACGACCCCGACCGCGGGAGCATTTCTGTGG  
TGGCTGCGGAGGGTGTTCGGCCTGACCGCCACCTTTACCGAGGAGGAGTCCATCGAGCTC  
AACCCATGGCTGAAGGACATCCTGAGGCCGTTCCCGCCTCCCTTGCCGCCGACGCCGCCG  
CCTCCATGCCCCGAGCCCTCGCCGGAAGCTGATCGACATGCCGGAGATCAGGGAGTTCATC  
ATGCGCGGGTCGTACCTCGGCGGTGGCCCTGCACCTCCGCGCTACGAGTGCATCATCCG  
GCCATGGTATGACCGGCGGCGATGATCAGCAGCAGCTCGATGAGCAGCGCAGAGACGAT  
GTTGGCGATGATCGAGCTCATTACGATCGGGTGGACGGCCAGCTGCAGTTCGAACGGCAC  
TACCTGCAGTTGTAA

Protein

>ONAC141

MGAASRPRRQCRAPRRLDGGGGGSM DVHPSELLPRSRCTAPRRLDDDEMDVHPSEQELIE  
TGFAPAVARSSGDEAWYFFSAVRGLKGGRKARTVDDGAGCWHSEAGAKPVLAASSGRRLG  
HRQSFSFITKDDDGQVRVSGWLMVELSLDVDEEEQLVLSKVYFSPRAPGARKPTTAAAMS  
RHKRKLSTTDIASPPRRQRRHRVVPSSPPEEPNTSPSPAAAPPDQQEGGDDDPDRGSISW  
WLRRVFGLTATFTEESIELNPWLKDILRPFPPLPPTPPPPCPSRRKLIDMPEIREFI  
MRGSYLGGGPAPPRYEC DHPAMVMTGGDDQQQLDEQRRDDVGDDRAHYDRVDGQLQFERH  
YLQL\*

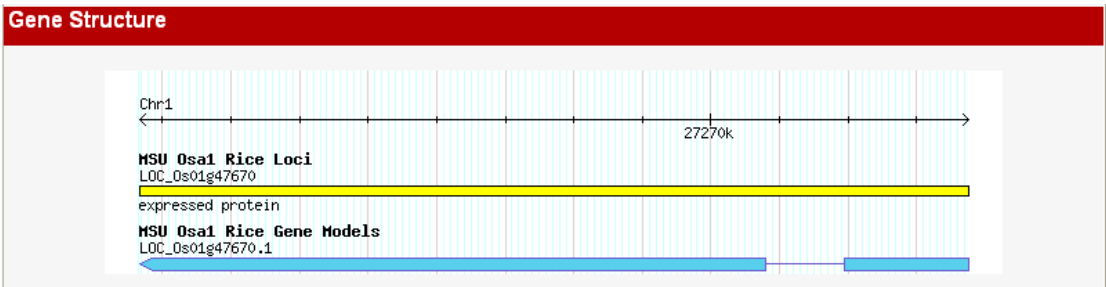

LOC\_Os03g61650 (ONAC142) sequence information

**Genomic sequence length:** 1095 nucleotides

**CDS length:** 1095 nucleotides

**Protein length:** 364 amino acids

**Putative Function:** expressed protein

Genomic Sequence

> ONAC142

ATGGCTGAGATCGGCAAGGGCTTGGTGTCTCCCCCAGCGACGACCAGCTACCGACGGC

TACCTCCGGAGCTACCTTGTCCGGACCAGCCTCGACGACCTGCCCTCCGCCGCCACCTCC  
TACTTCCACGTGCGCGACGTGTACTCCGCCCCACCCGATCAGCTCGTCGCCGGCCTCGCC  
CCGGCGCCCGGCACCGGCGACGGCGATGGCCGGGTGTGGTACGTGTTACCCCAAGTGC  
GTTCTCGGCAGCCGCGGCGCGAGGAAGGCTCGCACCGTCGGCGGCGGCTGCGGCGAGTGC  
TGGCACGCGGAGGGAGGCCCAAGGACGTCAAGGGCAGCGCCGCCGGCGCAAGCTGCAG  
AAGTTCTCGTACAAGATCAAGACGGCGTTGGGCGCCGTCGTCAAGCCCGGTGGCTCATG  
GTGGAGTTCTCGTTCCCCGGCTCCGACCACCTCGCGCTCTGCAAGGTCTACCGCTCGCCC  
CGCACGTGCGCTACGGCGCGCCCTCGCCGCCGTCTCCGCCGCGTCGTACCGTCGAGG  
GCCGCGCCGCCGCCGTGTCTGTCGACGTCCGGCCGCAAGCGCAAGGCAGAGGAGGAGTCC  
GACCACCCCGAGGCGCCAGCGAGCAGCGCGCCGCGGCGAACTCTGCCGGCGTCGGAGCAA  
CACGTGACGTGACGCCGCTGCAGCATCCGAGCCGGATCAGGGCGGCTACCTGAGCACT  
GACCAGCTGGACAGCGTCGCGGCGTTCGTGCAAGAACACGAGGCGTTCGTGCAAGAACAC  
GAGGGGGACGAGGAGTTCTGCAAGAGCCTCGGGTTCGACGAGCGCTCGGATCCGCAATGC  
TGGACCAACTTCTTCTTGTGCGCGTTGGAGGAGTTCGGGCCGGCGCCAGAAACCGACGCC  
GCCGCCGTGCGCGTCGCCGCCGTTGAGCCTGGCCCTTGCCCGGAGTACGAGGAACACGAT  
GACACTGCCACTACTGCTGCGTCCAGCCATGCTTACGACAGTGCCACGGCTGAGCTGGTG  
AACCTCTCGGACAAGGAGTTCTATGACATCATCTTCTCCGGTGACCAACAAGGCGGCGCC  
GCTGTGGCTGGATGA

CDS

> **ONAC142**

ATGGCTGAGATCGGCAAGGGCTTGGTGTCTCCCCAGCGACGACCAGCTACCGACGGC  
TACCTCCGGAGCTACCTTGTCCGGACCAGCCTCGACGACCTGCCCTCCGCCGCCACCTCC  
TACTTCCACGTGCGCGACGTGTACTCCGCCCCACCCGATCAGCTCGTCGCCGGCCTCGCC  
CCGGCGCCCGGCACCGGCGACGGCGATGGCCGGGTGTGGTACGTGTTACCCCAAGTGC  
GTTCTCGGCAGCCGCGGCGCGAGGAAGGCTCGCACCGTCGGCGGCGGCTGCGGCGAGTGC  
TGGCACGCGGAGGGAGGCCCAAGGACGTCAAGGGCAGCGCCGCCGGCGCAAGCTGCAG  
AAGTTCTCGTACAAGATCAAGACGGCGTTGGGCGCCGTCGTCAAGCCCGGTGGCTCATG  
GTGGAGTTCTCGTTCCCCGGCTCCGACCACCTCGCGCTCTGCAAGGTCTACCGCTCGCCC  
CGCACGTGCGCTACGGCGCGCCCTCGCCGCCGTCTCCGCCGCGTCGTACCGTCGAGG  
GCCGCGCCGCCGCCGTGTCTGTCGACGTCCGGCCGCAAGCGCAAGGCAGAGGAGGAGTCC  
GACCACCCCGAGGCGCCAGCGAGCAGCGCGCCGCGGCGAACTCTGCCGGCGTCGGAGCAA  
CACGTGACGTGACGCCGCTGCAGCATCCGAGCCGGATCAGGGCGGCTACCTGAGCACT  
GACCAGCTGGACAGCGTCGCGGCGTTCGTGCAAGAACACGAGGCGTTCGTGCAAGAACAC  
GAGGGGGACGAGGAGTTCTGCAAGAGCCTCGGGTTCGACGAGCGCTCGGATCCGCAATGC  
TGGACCAACTTCTTCTTGTGCGCGTTGGAGGAGTTCGGGCCGGCGCCAGAAACCGACGCC  
GCCGCCGTGCGCGTCGCCGCCGTTGAGCCTGGCCCTTGCCCGGAGTACGAGGAACACGAT  
GACACTGCCACTACTGCTGCGTCCAGCCATGCTTACGACAGTGCCACGGCTGAGCTGGTG  
AACCTCTCGGACAAGGAGTTCTATGACATCATCTTCTCCGGTGACCAACAAGGCGGCGCC  
GCTGTGGCTGGATGA

Protein

> **ONAC142**

MAEIGKGLVFSPSDDQLTDGYLRSYLVRTSLDDLPSAATSYFHVADVYSAPPDQLVAGLA

PAPGTGDGDGRVWYVFTPVRVLGSRGARKARTVGGGCGECWHAEGGPKDVKGSAAGGKLQ  
KFSYKIKTALGAVVKPGWLMVEFSFPGSDHLALCKVYRSPRTSRYGAPSPSSAASSPSR  
AAPPPVSSTSGRKRKAEEESDHPEAPASSAPRRTLPASEQHVDVDAANAASEPDQGGYLST  
DQLDSVAAFVQEHEAFVQEHEGDEEFCKSLGFDERSDPQCWTNFFLSALEEFGPAPETDA  
AAVAVAAVEPGPCPEYEEHDDTATTAASSHAYDSATAELVNLSDKIFYDIIFSGDQQGGA  
AVAG\*

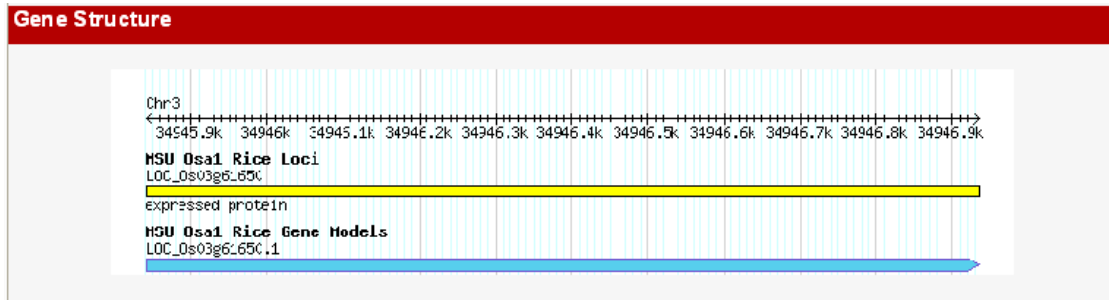

# **LOC\_Os04g42940 (ONAC143) sequence information**

**Genomic sequence length:** 1272 nucleotides

**CDS length:** 1188 nucleotides

**Protein length:** 395 amino acids

**Putative Function:** expressed protein

Genomic Sequence

## > **ONAC143**

GCGTGCCGATAGTATATATGGCGGAGTAGTAGTTGAGTCGAGTTCGCGCATGCGCCGCCG  
TGGCGACGACCTAGCTTAAACCCATATGCTGCCCATGCGTCCCAGGGCGAGTCAGGCGGCG  
GCGCCGAGACCGCCGCCCGCGGAGAGCCTCCGCGAGGAGGAGACCGAGGACGGGTGG  
GTCTTCCTCGCCGGCAGGTCAAGGGCGACGAGGCCGCCGCCGCCGCCCTTCGCCATG  
GCGAGGGCCGTGGCGTCCGGCAGCAGCGGCGGAGGCGGCCAGCCGTTTCGACCCACG  
GCGGAGGATATCGTCAACCGGTACCTGCCGTTGCGCCGGGCGCTGCGGTGCGACGCGCTG  
CCGAGGCAGGTGCACGACGCGGATGTGTACGGCGCGCACCCGGCGCTGCTCGCGTCGGTG  
TACCCGGCGGCGAACGAGCGGTTTCGAGTGGTTCTTCTTCGTGTGCCGCCGTCAGTGCCCC  
GGTGCCCGGCGCAGGGCCGGGCCCCGGGACTACCGCCTCTCGCAGGAGGCGAAGCACCGC  
GGCAACGCGTTCTGCCACAGCTTCCGGTACTACGAGTACGAGGACGCCGGCGGCGGCTTC  
AGGGAGACCGAGTGGCGCATGGTGGAGTACGGCGATCGCGGCCGCGACGCCGGCGCCGGA  
GGCTCCGAGGGCTTCGAGCTGGTTCGTCTGCAAGGTCTACCCGGCGCGCGCGGGGCGCTC  
CACGAGCGGCTCGGGGCCGACCGGGCGGTGCTCGCGACGCGCCACCGCGCCGACGAGGAC  
GCCAAGCCGACAGGTGCTCGTCCAGCTCTACCTCGCCAGCCTCCGCCTCGGAACCCGCTC  
GCGTGCCGCGTGACCCGCGCCGACGAGTCTTCGACGCGCACCCGGCGGTGATCACGGCC  
GCGCTCCCTGCTGCCAACGACCGGTGCGAGTGGTTCTTCGCCGCCGTGCGCCCGCGCGGG  
CACGCGCAAGGGCACGGGGACGGCGCGCCGCCCGCGCCGGAAGGCCGGGCCAGGGGCG  
TACGTGCCGGTGCGCGAGTGCCGCGTCGTGGACGGGAGGCGCGGGACATGGGCTGCCGC  
CTCGTGTTCGTGACAGGAGGACGACGAGGAGGCGAGGCGGGCGTCGCGGAGGACGAG  
TGGTGGATGGACGAGTACAGGTTCGGCCCCGACTTCCCGTACGGCGAGCTGCCCGCGCCC  
ATGGCGCGCGGCGAAGACGAAGAGCTGGTGGTGTACAAGGTGTATCCTAGGCTGGTTCGGT

AACCGGCGATAA

CDS

> **ONAC143**

ATGCTGCCCATGCGTCCCAGGGCGAGTCAGGCGGCGGCGCCGAGACCGCCGCCGCCGCG  
GAGAGCCTCCGCGAGGAGGAGACCGAGGACGGGTGGGTCTTCCTCGCCGGCAGGTCAAGG  
GCGACGAGGCCGCCGCCGCCGCCCTTCGCCCATGGCGAGGGCCGTGGCGTCCGGCAGC  
AGCGGCGGCGGAGGCGGCCAGCCGTTTCGACCCACGGCGGAGGATATCGTCAACCGGTAC  
CTGCCGTTGCGCCGGGCGCTGCGGTGCGACGCGCTGCCGAGGCAGGTGCACGACGCGGAT  
GTGTACGGCGCGCACCCGGCGCTGCTCGCGTCGGTGTACCCGGCGGCGAACGAGCGGTTC  
GAGTGGTCTTCTTCGTGTGCCGCCGTCAAGTCCCCGGTGGCCGGCGCAGGGCCGGGCC  
GGGGACTACCGCCTCTCGCAGGAGGCGAAGCACCGCGCAACGCGTTCGCCACAGCTTC  
CGGTACTACGAGTACGAGGACGCCGGCGGCGGCTTCAGGGAGACCGAGTGGCGCATGGTG  
GAGTACGGCGATCGCGGCCGCGACGCCGGCGCCGAGGCTCCGAGGGCTTCGAGCTGGTC  
GTCTGCAAGGTCTACCCGGCGCGCGGCGGGGCGCTCCACGAGCGGCTCGGGGCCGACCGG  
GCGGTGCTCGCGACGCGCCACCGCGCCGACGAGGACGCCAAGCCGCAGGTGCTCGTCCAG  
CTCTACCTCGCCAGCCTCCGCCCTCGGGAACCCGCTCGCGTGCCGCGTGACCCGCGCCGAC  
GACGTCTTCGACGCGCACCCGGCGGTGATCACGGCCGCGCTCCCTGCTGCCAACGACCGG  
TGCGAGTGTTCTTCGCCGCCGTGCGCCCGCGCGGGCACGCGCAAGGGCACGGGGACGGC  
GCGCCGCCGCGCCCGCGGAAGGCCGGGCCAGGGGCGTACGTGCCGGTGCGCGAGTGCCGC  
GTCGTGGACGGGAGGCGCGGGGACATGGGCTGCCGCCCTCGTGTCTGGTACAGGGAGGAC  
GACGAGGAGGCGAGGCGGGCGCTCGCGGAGGACGAGTGGTGGATGGACGAGTACAGGTTC  
GGCCCGGACTTCCCGTACGGCGAGCTGCCCCGCGCCATGGCGCGCGGCCAAGACGAAGAG  
CTGGTGGTGTACAAGGTGTATCCTAGGCTGGTCGGTAACCGGCGATAA

Protein

> **ONAC143**

MLPMRPRASQAAAPETAAAAESLREEETEDGWVFLAGRSRATRPPPPPPSPMARAVASGS  
SGGGGGQFPDPTAEDIVNRYLPLRRALRCDALPRQVHDADVGAHPALLASVYPAANERF  
EWFFVCRRRQCPGRRRRAGPGDYRLSQAETHRGNAFCHSFRYYEYEDAGGGFRETEWRMV  
EYGDRGRDAGAGGSEGFELVVKVYPARGGALHERLGADRAVLATRHRADEDAPQVLVQ  
LYLASLRLGNPLACRVHRADDVFDHPAVITAALPAANDRCEWFFAAVRPRGHAQGHGDG  
APPRPRKAGPGAYVPVRECRVVDGRRGDMGCRLVFWYREDDEEARRASRRTEWWMDEYRF  
GPDFPYGELPAPMARGEDEELVVYKVYPRLVGNRR\*

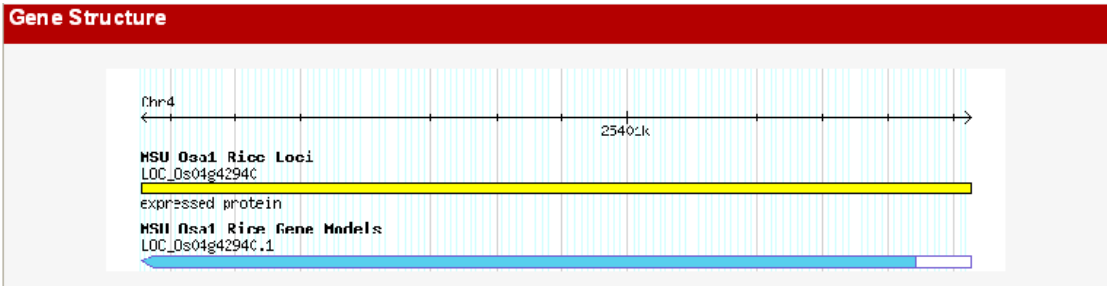

**LOC\_Os05g26026 (ONAC144) sequence information**

**Genomic sequence length:** 963 nucleotides

**CDS length:** 963 nucleotides

**Protein length:** 320 amino acids

**Putative Function:** expressed protein

#### Genomic Sequence

##### > **ONAC144**

ATGGCGGCGGCTGCGGCTGGCGCGGATGGGCTCCTCCCGGGCCTCAAGCTCGATCCCAGC  
GACGACGAGCTCGTCGGCCGCTGCCTGCTCCGGCGCCTCCAGGGCCAGCCCCCTCCCGCTC  
GGCGGCGACATCCTCGAGGCGGATCCCCTGAGCGCGCCGCCGCCGTGGAATCTTCTCGCG  
GATCACGGCCGCGGCGACGAGGCCCTTCTTCTTGCCAAGAAGGGGAACGAAAGCGGCAG  
AGGAGCAGTGTGAGGGGCGAGAGGATGTGCGTGGACGGCGGGAGGCTCCGGGTCCCTGAT  
GACGGTCGCGGCGGCGGCGGTGGTTTGGCTTTCTTGCCGTCGATCTTTCCTTCGCCACCA  
CCGGTTCCCCGCTGCTCCACTCCGCTGTCCCCGTCTCGCCGCCATTTAAGCCGAGCCGG  
GTGATCGTCAGATGGTGGGCGCCGCCGGGGGGGTGGTGCAAACCTCAACTTTGATGGCAGC  
GTGTATGACGACGATCCCGGCGAGCGAGCATCGGCGGCGTGATCCGCGGCTGCGACGGT  
GGCGTGGTGCTCGCCTTCGCGGAGATCACGGAGCACTGGACGGTTGGCGTGGTGGAGGCC  
CGTGCGATGATCCGGGGGCTGAGGCTCGCGCTGGCGTGCTTCGTCGAGCGGCTTGTCGTC  
GAGGGCGACGACCTGGTGCTGGTTACAGTCATCCGCGGCGAGGAGACGCAGACGAGGATC  
CCGGCGGCGATGCACGAGGAAATCCTGGACCTGCTCCGCTGCTTCGCGGACGTCGAGGTG  
CGACACATATATCGGGAGGGCAACTCGATGGCCACACCCTGTGTCGCCAGGCGTACGTG  
CATCCCGGGCTGTGGACAGATTGCGCCACGCTGCCGGCCGCCGTCTGGGAGAAGATCGAC  
GATGATCTGCGCGGGGTGGTGACGAGCGCTCTGCAACAAGAAGAAGAAATCCAGCGCT  
TGA

#### CDS

##### > **ONAC144**

ATGGCGGCGGCTGCGGCTGGCGCGGATGGGCTCCTCCCGGGCCTCAAGCTCGATCCCAGC  
GACGACGAGCTCGTCGGCCGCTGCCTGCTCCGGCGCCTCCAGGGCCAGCCCCCTCCCGCTC  
GGCGGCGACATCCTCGAGGCGGATCCCCTGAGCGCGCCGCCGCCGTGGAATCTTCTCGCG  
GATCACGGCCGCGGCGACGAGGCCCTTCTTCTTGCCAAGAAGGGGAACGAAAGCGGCAG  
AGGAGCAGTGTGAGGGGCGAGAGGATGTGCGTGGACGGCGGGAGGCTCCGGGTCCCTGAT  
GACGGTCGCGGCGGCGGCGGTGGTTTGGCTTTCTTGCCGTCGATCTTTCCTTCGCCACCA  
CCGGTTCCCCGCTGCTCCACTCCGCTGTCCCCGTCTCGCCGCCATTTAAGCCGAGCCGG  
GTGATCGTCAGATGGTGGGCGCCGCCGGGGGGGTGGTGCAAACCTCAACTTTGATGGCAGC  
GTGTATGACGACGATCCCGGCGAGCGAGCATCGGCGGCGTGATCCGCGGCTGCGACGGT  
GGCGTGGTGCTCGCCTTCGCGGAGATCACGGAGCACTGGACGGTTGGCGTGGTGGAGGCC  
CGTGCGATGATCCGGGGGCTGAGGCTCGCGCTGGCGTGCTTCGTCGAGCGGCTTGTCGTC  
GAGGGCGACGACCTGGTGCTGGTTACAGTCATCCGCGGCGAGGAGACGCAGACGAGGATC  
CCGGCGGCGATGCACGAGGAAATCCTGGACCTGCTCCGCTGCTTCGCGGACGTCGAGGTG  
CGACACATATATCGGGAGGGCAACTCGATGGCCACACCCTGTGTCGCCAGGCGTACGTG  
CATCCCGGGCTGTGGACAGATTGCGCCACGCTGCCGGCCGCCGTCTGGGAGAAGATCGAC  
GATGATCTGCGCGGGGTGGTGACGAGCGCTCTGCAACAAGAAGAAGAAATCCAGCGCT  
TGA

Protein

> **ONAC144**

MAAAAAGADGLLPGLKLDPSDDELVGRCLLRRLQGQPLPLGGDILEADPLSAPPPWNLLA  
DHGRGDEAFFLAKKGNGKRQRSSVEGQRMCDGGRLRVPDDGRGGGGGLAFLPSIFPSPP  
PVPRCSTPLSPSSPPFKPSRVIVRWWAPPGGWCKLNFDSVYDDGSRRASIGGVIRGCDG  
GVVLAFAEITEHWTVGVEARAMIRGLRLALACFVERLVVEGDDLVLVQLIRGEETQTRI  
PAAMHEEILDLLRCFADVEVRHIYREGNSMAHTLCRQAYVHPGLWTDATLPAAVWEKID  
DDLRGVVHERLCNKKKKSSA\*

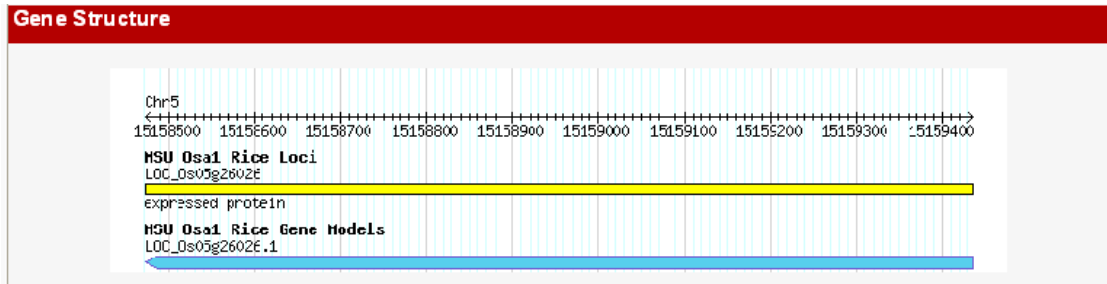

**LOC\_Os05g26049 (ONAC145) sequence information**

**Genomic sequence length:** 963 nucleotides

**CDS length:** 963 nucleotides

**Protein length:** 320 amino acids

**Putative Function:** expressed protein

Genomic Sequence

> **ONAC145**

ATGGCGGCGGCTGCGGCTGGCGCGGATGGGCTCCTCCCGGGCCTCAAGCTCGATCCCAGC  
GACGACGAGCTCGTCGGCCGCTGCCTGCTCCGGCGCCTCCAGGGCCAGCCCCCTCCCGCTC  
GGCGGCGACATCCTCGAGGCGGATCCCCTGAGCGCGCCGCCCGCTGGAATCTTCTCGCG  
GATCACGGCCGCGGCGACGAGGCCCTTCTTCTTGCCAAAGAAGGGGAACGGAAGCGGCAG  
AGGAGCAGTGTGAGGGGCGAGGATGTGCGTGGACGGCGGGAGGCTCCGGGTCCCTGAT  
GACGGTCGCGGCGGCGGCGGTGGTTTGGCTTTCTTGCCGTCGATCTTTCCTTCGCCACCA  
CCGGTTCCCCGCTGCTCCACTCCGCTGTCCCCGTCTCGCCGCCATTTAAGCCGAGCCGG  
GTGATCGTCAGATGGTGGGCGCCGCCGGGGGGGTGGTGAAACTCAACTTTGATGGCAGC  
GTGTATGACGACGATCCCGGCGAGCGAGCATCGGCGGCGTGATCCGCGGCTGCGACGGT  
GGCGTGGTGCTCGCCTTCGCGGAGATCACGGAGCACTGGACGGTTGGCGTGGTGGAGGCC  
CGTGCGATGATCCGGGGGCTGAGGCTCGCGCTGGCGTGCTTCGTCGAGCGGCTTGTCTC  
GAGGGCGACGACCTGGTGCTGGTTCAGCTCATCCGCGGCGAGGAGACGCAGACGAGGATC  
CCGGCGGCGATGCACGAGGAAATCCTGGACCTGCTCCGCTGCTTCGCGGACGTCGAGGTG  
CGACACATATATCGGGAGGGCAACTCGATGGCCACACCCTGTGTGCCAGGCGTACGTG  
CATCCCGGGCTGTGGACAGATTGCGCCACGCTGCCGGCCGCGTCTGGGAGAAGATCGAC  
GATGATCTGCGCGGGGTGGTGACGAGCGCTCTGCAACAAGAAGAAGAAATCCAGCGCT  
TGA

CDS

> **ONAC145**

ATGGCGGCGGCTGCGGCTGGCGCGGATGGGCTCCTCCCGGGCCTCAAGCTCGATCCCAGC  
GACGACGAGCTCGTCGGCCGCTGCCTGCTCCGGCGCCTCCAGGGCCAGCCCCTCCCGCTC  
GGCGGCGACATCCTCGAGGCGGATCCCCCTGAGCGCGCCGCCCGCGTGAATCTTCTCGCG  
GATCACGGCCCGCGGCGACGAGGCCCTTCTTCTTGGCCAAGAAGGGGAACGAAAGCGGCAG  
AGGAGCAGTGTGAGGGGCGAGGATGTGCGTGGACGGCGGGAGGCTCCGGGTCCCTGAT  
GACGGTCGCGGCGGCGGCGGTGGTTTGGCTTTCTTGCCGTCGATCTTTCCTTCGCCACCA  
CCGGTTCCCCGCTGCTCCACTCCGCTGTCCCCGTCTCGCCGCCATTTAAGCCGAGCCGG  
GTGATCGTCAGATGGTGGGCGCCGCCGGGGGGTGGTGAACTCAACTTTGATGGCAGC  
GTGTATGACGACGGATCCCGGCGAGCGAGCATCGGCGGCGTGATCCGCGGCTGCGACGGT  
GGCGTGGTGCTCGCCTTCGCGGAGATCACGGAGCACTGGACGGTTGGCGTGGTGGAGGCC  
CGTGCGATGATCCGGGGGCTGAGGCTCGCGCTGGCGTGCTTCGTGAGCGGCTTGTCGTC  
GAGGCGACGACCTGGTGCTGGTTCAGCTCATCCGCGCGAGGAGACGCAGACGAGGATC  
CCGGCGGCGATGCACGAGGAAATCCTGGACCTGCTCCGCTGCTTCGCGGACGTCGAGGTG  
CGACACATATATCGGGAGGGCAACTCGATGGCCACACCCTGTGTCGCCAGGCGTACGTG  
CATCCCGGGCTGTGGACAGATTGCGCCACGCTGCCGGCCCGCTCTGGGAGAAGATCGAC  
GATGATCTGCGCGGGGTGGTGACGAGCGCCTCTGCAACAAGAAGAAGAAATCCAGCGCT  
TGA

Protein

> **ONAC145**

MAAAAAGADGLLPGLKLDPSDDELVGRCLLRRLQGQPLPLGGDILEADPLSAPPPWNLLA  
DHGRGDEAFFLAKKNGKRQRSSVEGQRMCDGGRRLRVPDDGRGGGGGLAFLPSIFPSPP  
PVPRCSTPLSPSSPPFKPSRVIVRWAPPGGWCKLNFDGSVYDDGSRRASIGGVIRGCDG  
GVVLAFAEITEHWTGVVVEARAMIRGLRLALACFVERLVVEGDDLVLVQLIRGEETQTRI  
PAAMHEEILDLLRCFADVEVRHIYREGNSMAHTLCRQAYVHPGLWTDATLPAAVWEKID  
DDLRGVVHERLCNKKKKSSA\*

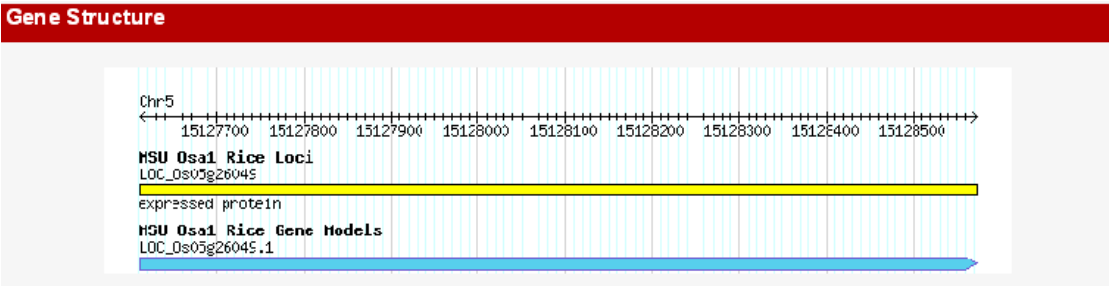

**LOC\_Os05g27749 (ONAC146) sequence information**

**Genomic sequence length:** 1218 nucleotides

**CDS length:** 1218 nucleotides

**Protein length:** 405 amino acids

**Putative Function:** expressed protein

Genomic Sequence



> **ONAC146**

ATGGCGGCGGCTGCGGCTGGCGCGGATGGGCTCCTCCCGGGTCCCAAGCTTGATCCTAGC  
 GACGACGAGCTCGTCGGCGGCTACCTGCTCCGGCGCCTCCAGGGCCAGCCCCTCCCGCTC  
 GAGGCGGATCCCCTGAGCGCGCGGCCGCGGAATCTTGCCGCGGATCACGGCCGCGGCGAC  
 GAGGCCTTCTTCTTGCGGAGGCGCAGGCCAAGAACGCGAAGGGAAAGCGGCAGAGGAGC  
 ACCGTCGAGGGGCAGAGCATGTGCGTGACGGCGGGAGGCTCCGCGTCCCTGATGACGGT  
 CGCGGCGGCGGCGGATTGGCTTTCTCGCACTTCTTGCCGCTGTCGCCGTCGATCGTTCCC  
 TCGCCAGCACCGTCTCCCCGCTGCTCCACCTCCACGCCGCTGTCCCCGCCGAAGCTTCTC  
 GCGGATCACGGCCGGGGCGACGAGGCCGCCCTTCTTCGCGGACGCGTGGGCCAAGAACGGC  
 AAGCGGCAGAAGCAGAGGAGCACCGTCGAGGGCGGAGGGCTCTGGCAGGGGCAGGGGATG  
 CTCGTGGACGGCGAGAGGCTCCGCGTCGCTGATGACGGCGGCGGCGGTTTCGGCTTTCTTG  
 CCGCCGTCGATCCTTCCGTCGCTGCTGCCGGCTCCCCGCTGCTCCACGCCGCTCTCCCCG  
 TCCTCGCCGCCGTTCCGGCCGTCCAGGGTGATCGTTTCGGTGGGCGCGGCCGCCGCTGGG  
 TGGTGCAAACCTGAACTTTGACGGCTCGGTGTTCAACGACGGCTCCCCGCGAGCGAGCATC  
 GCGGCGTCATCCGCGACAGCGACGCCGGCGTGCTCGCCTTCGCGGAGACAACGGAG  
 CACTGGACCGTCGGCGTGGTGGAGGCCCGTGCTATGATCAGAGGCCTGAGGTTTCGCGCTG  
 GCGTGCTTCATCGAGCGGCTCGTGGTGGAGGGCGACGACCTGGTGCTGGTCCAGCTCATC  
 CGCGGCGAGGAGACGCAGACGAGGATCCCGGCGGCGATGCAGGAGGAGATCCTCAACCTT  
 CTGCGATGCTTCGCCGAGGTGGATGTGCGGCACATCTACCGGGAGGGAACTCGGTGGCC  
 CACACACTGTGCCGGCAGGCGTACGTGTGTCCGGGCATATGGTTCGAGAGGGGAGGAGGG  
 ATGCCGGCGGCCGTCTGGGACAAGGTGGATGATGATAGGCGAGGGGTGGTGACGAGCGC  
 ATCCGCAAGAACAAGTAG

CDS

> **ONAC146**

ATGGCGGCGGCTGCGGCTGGCGCGGATGGGCTCCTCCCGGGTCCCAAGCTTGATCCTAGC  
 GACGACGAGCTCGTCGGCGGCTACCTGCTCCGGCGCCTCCAGGGCCAGCCCCTCCCGCTC  
 GAGGCGGATCCCCTGAGCGCGCGGCCGCGGAATCTTGCCGCGGATCACGGCCGCGGCGAC  
 GAGGCCTTCTTCTTGCGGAGGCGCAGGCCAAGAACGCGAAGGGAAAGCGGCAGAGGAGC  
 ACCGTCGAGGGGCAGAGCATGTGCGTGACGGCGGGAGGCTCCGCGTCCCTGATGACGGT  
 CGCGGCGGCGGCGGATTGGCTTTCTCGCACTTCTTGCCGCTGTCGCCGTCGATCGTTCCC  
 TCGCCAGCACCGTCTCCCCGCTGCTCCACCTCCACGCCGCTGTCCCCGCCGAAGCTTCTC  
 GCGGATCACGGCCGGGGCGACGAGGCCGCCCTTCTTCGCGGACGCGTGGGCCAAGAACGGC  
 AAGCGGCAGAAGCAGAGGAGCACCGTCGAGGGCGGAGGGCTCTGGCAGGGGCAGGGGATG  
 CTCGTGGACGGCGAGAGGCTCCGCGTCGCTGATGACGGCGGCGGCGGTTTCGGCTTTCTTG  
 CCGCCGTCGATCCTTCCGTCGCTGCTGCCGGCTCCCCGCTGCTCCACGCCGCTCTCCCCG  
 TCCTCGCCGCCGTTCCGGCCGTCCAGGGTGATCGTTTCGGTGGGCGCGGCCGCCGCTGGG  
 TGGTGCAAACCTGAACTTTGACGGCTCGGTGTTCAACGACGGCTCCCCGCGAGCGAGCATC  
 GCGGCGTCATCCGCGACAGCGACGCCGGCGTGCTCGCCTTCGCGGAGACAACGGAG  
 CACTGGACCGTCGGCGTGGTGGAGGCCCGTGCTATGATCAGAGGCCTGAGGTTTCGCGCTG  
 GCGTGCTTCATCGAGCGGCTCGTGGTGGAGGGCGACGACCTGGTGCTGGTCCAGCTCATC  
 CGCGGCGAGGAGACGCAGACGAGGATCCCGGCGGCGATGCAGGAGGAGATCCTCAACCTT  
 CTGCGATGCTTCGCCGAGGTGGATGTGCGGCACATCTACCGGGAGGGAACTCGGTGGCC  
 CACACACTGTGCCGGCAGGCGTACGTGTGTCCGGGCATATGGTTCGAGAGGGGAGGAGGG  
 ATGCCGGCGGCCGTCTGGGACAAGGTGGATGATGATAGGCGAGGGGTGGTGACGAGCGC

ATCCGCAAGAACAAGTAG

Protein

> **ONAC146**

MAAAAAGADGLLPKLDPSDDELVGGYLLRRLQGGPLPLEADPLSARPRNLAADHGRGD  
EAFFLAEQAQAKNAKGRQRSTVEGQSMCVDGGRLRVPDDGRGGGGLAFSHFLPLSPSIVP  
SPAPSPRCSTSTPLSPPKLLADHGRGDEAAFFADAWAKNGKRQKQRSTVEGGGLWQQQGM  
LVDGERLRVADDGGGGS AFLPPSILPSLLPAPRCSTPLSPSSPPFRPSRVIVRWARPPPG  
WCKLNFDSVFNDSPPRASIGGVIRSDAGVVLFAETTEHWTVGVEARAMIRGLRFAL  
ACFIERLVVEGDDLVLVQLIRGEETQTRIPAAMQEEILNLLRCFAEVDVRHIYREGNSVA  
HTLCRQAYVCPGIWSQRGGGMPAAVWDKVVDDRRGVVHERIRKNK\*

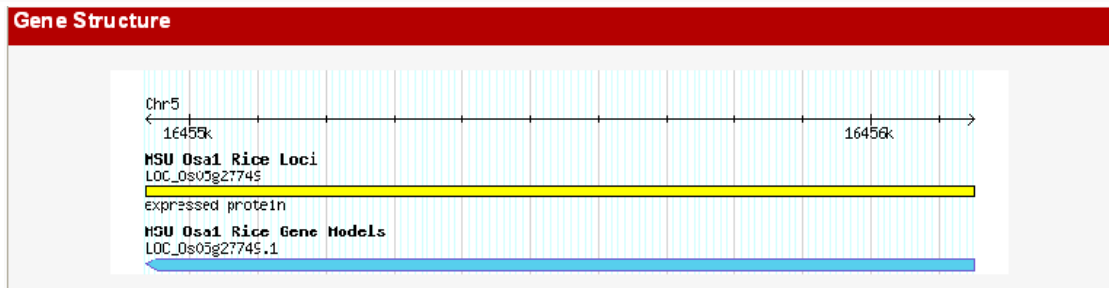

**LOC\_Os07g31410 (ONAC148) sequence information**

**Genomic sequence length:** 636 nucleotides

**CDS length:** 636 nucleotides

**Protein length:** 211 amino acids

**Putative Function:** expressed protein

Genomic Sequence

> **ONAC148**

ATGGCGCCGCTCGCAGATCCCGCCGCCGAGGGCTTCCGCATCCCCTTCCTCCCCAGCGAC  
AGCGACCTCCTCGACTGCCTCCTCCGCCCAAGATCGCTCCGGCCGCGTCGACCCCCGC  
TTCGCGCCGCTCGTGCACGACGTCGCCGACGCGTTCGCCCTCCCCCGGCCAGCTGGCG  
GCCGCGCACGCGCCCGCGCCCGCGCGCGCGCGAGGCGTGGTACTTCTTCAGCGTG  
CGCCCCCGCGCCCGCGCCCGCGCGCGCGGATCCAAGAGGGCGGCGTCGCGCGCGGTC  
GGCGGCGGCGGCGCAAGCGGTGGTGCTCGATGGGCGCCAAGAAGGCGGTGGAGGGAGGC  
GGGTACTGCCAGAGGTTTCAAGTACAAGGAGAGGACGGCGGCGGGCGTCTGGCGCCCCGA  
TGGATGATGGTGGAGTACGGCGTCGCCCAGGAACACGACGGCGAGGGCGTCGCCAGGAA  
CACGGCGGCGAGGGCGTCGCCGAGCTCGTGCTCTGCAAGATCTTCGCTCCCCCGAGCCT  
TCCCGTCGCTCGGAGTCGGGGTCGCCGTCCTCCAGCTCGTCGGCCTCCGCCTCCCCGTCC  
TGCTCCGGCGGCCGCAAGAGGAAGGCCGCCGAATAG

CDS

> **ONAC148**

ATGGCGCCGCTCGCAGATCCCGCCGCCGAGGGCTTCCGCATCCCCTTCCTCCCCAGCGAC

AGCGACCTCCTCGACTGCCTCCTCCGCCCCAAGATCGCCTCCGGCCGCGTCGACCCCCGC  
TTCGCGCCGCTCGTGACGACGTCGCCGACGCGTTCGCCCTCCCCCGGCCAGCTGGCG  
GCCGCGCACGCGCCCGCGCCGGCGCGCGCGCGGAGGCGTGGTACTTCTTCAGCGTG  
CGCCCCCGCGCCCGCGCCCGCGCCCGCGCCGGATCCAAGAGGGCGGCGTCGCGCGCGGTC  
GGCGGCGGCGGCGCAAGCGGTGGTGCTCGATGGGCGCCAAGAAGGCGGTGGAGGGAGGC  
GGGTACTGCCAGAGGTTCAGGTACAAGGAGAGGACGGCGGCGGGCGTCTGGCGCCCCGA  
TGGATGATGGTGGAGTACGGCGTCGCCAGGAACACGACGGCGAGGGCGTCGCCAGGAA  
CACGGCGGCGAGGGCGTCGCCGAGCTCGTGCTCTGCAAGATCTTCCGCTCCCCGAGCCT  
TCCCGTCGCTCGGAGTCGGGGTCGCCGTCTCCAGCTCGTCGGCCTCCGCTCCCGTCC  
TGCTCCGGCGGCCGCAAGAGGAAGGCCGCCGAATAG

Protein

> **ONAC148**

MAPLADPAAEGFRIPFLPSDSLDCLLRPKIASGRVDPRFAPLVHVDADAFALPPAQLA  
AAHAPAPGAGGAEAWYFFSVRPRARARARAGSKRAASRAVGGGGGKRWCSMGAKKAVEGG  
GYCQRFYKERTAAGVVAPRWMVVEYGVAQEHDEGVAQEHGEGVAELVLCKIFRSPEP  
SRRSESGSPSSSSSASASPSCSGGRKRKAAE\*

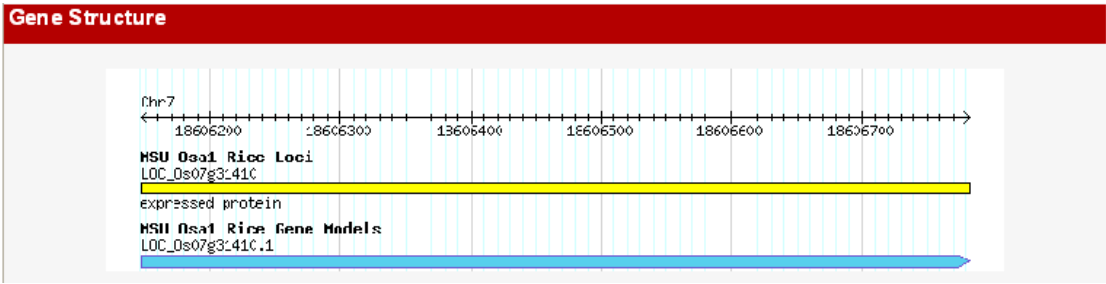

**LOC\_Os10g27380 (ONAC149) sequence information**

**Genomic sequence length:** 1720 nucleotides

**CDS length:** 1128 nucleotides

**Protein length:** 375 amino acids

**Putative Function:** expressed protein

Genomic Sequence

> **ONAC149**

GGAGCACACGCACGCGCGGCGGACGGCGCGACCTCGCCTCGACACGAGCTCTCGTGATC  
TCGTCTCGCCGCGTCTAGCTCGCCGGCGCCGCCGCGCGCGCGTCCCCTCGCCGCCGTA  
CGTGTAGCGGAGCGACTCCCTCTCTCCCTCCCGCTCACCTCCGGGACCGGTCGGTCGGT  
CGATCGATCGACGGGGCGAGGGGATGGCGGCACCGGAAGGCCAGAACAAAGTTCGCGGGCG  
TCCGCTTCTTGCCCAAGGACCTGGAGCTCCTCGCCATCCTCGACGCCAAGCTCCGCGGAA  
GCCCCGTTAGGCCCGTGGAAAGCCATCTCCACGACACGCAGATCCTCGACTTCCACCCGT  
ACAAGCTCTACGGTATCCACCGCCTCGATCGATCGATCTCCCTCTCTCTCTCTTTGTC  
GATCTCCTTCTTCTCTCCGGCGACGGGTGGGTGCCTGGATCAGATCATGCAGTTTGGG  
GATTTTGATTTCGGGATTTTCGGGTGGATATTACTCGACTGATTTTGCAGAGATGTATGCTG  
AGGACGAGGAGGAGGAAGGCTACATCTACTTCTTCAGCACGATGCAGTTCAGATGCAGGA

AGATTGTGGAGCGCGCGCGCAGGGCGGCCGGTGAAGGTGAACAACCTGCGAGACTCTGG  
 AGGTTGGCGGCGTCGCCGTTGGCCGGAAGTTCACCATGAATTTCTACGAGCATATCGGCG  
 GCGACAACGACCTCATCTGGACCAACTGGGGCATGCAAGAGTTCGCCAGGATCATCGGCC  
 CAAACAAGGAGGTATTCCATTTCGAAAATCCACTTCTGAATCTTCGTTCAATGATCGGATA  
 CATTTGATCTCATTTGGGTGAAATTTTTCTGATCATTTTGGCCAAAAGCTCGCGGATCTT  
 GCCTTGTACCGCCTATACAAGAAGAAAATAACAAGGGGGACAGGCGAGGAGAAGCCGGAA  
 GACATCGCCGCGGCTAGCGATGGCGATACCGAGAGCAGCATGAACAAGCGTAGACGTGTA  
 GAAGCGTCGGCGGCGGCCATGGCGCTGCCACCGCCACCGCCATCGCCAGGCCTGCCTGGA  
 ACAATGATGTTTCATGGCGGCGGACCAGGCGAACGTGGCCTCGACCTCGCAGGAATGGCAC  
 GGCCAGTTCGCCAACGGCGCTGCGGGCGGCGCCGAGTCCTAGCGGCTGCTGGCCCTGGGCG  
 CCACCGCCGACACCGAGCGCAGTGGAGCCTTTCAGCTTCTGGGCCAGCGCGTCGGCGGCG  
 ACTCCTCCTGCCGCCGGAACCTACCACCCGTCGCCGCAGCCGCAGCCGCTGCCGCCGCGAG  
 GGCGGCGAGTACTACTCCAGACACGGCGCCTTCTCGGTGGCGCCCGTGCCCGCGTCCGCC  
 TGCTCGACGCCGTCCCCGGAGGCGGCGACCAGCTGCCTCTTGGCTACGACGTCACCTCTG  
 CCGGCGGCAGGTACTGAGGGCAGTGACAGTCAGCAGCAAGAACCCCCCTGCGAATTGATG  
 GAATTTTGAAATTTTGGCGAATTGCTTATAGCTGATTCTGATCTGGCCGACAAATTTCCG  
 TCAAATTCGCAGTGTTCAACTTCGTACTCTTTTTCTGACCGTTGGCTGTTACTTCACTAG  
 TTCTACATATGTGAGACTGCATTGTTTTTGTACTAGTATTAATCTTGGTGATCTGTTGT  
 TCTGAAATGCTTATAAATTTTGCCCTTGTGCCTTGAAGAA

CDS

> **ONAC149**

ATGGCGGCACCGGAAGGCCAGAACAAAGTTCGCGGGCGTCCGCTTCTTGCCCAAGGACCTG  
 GAGCTCCTCGCCATCCTCGACGCCAAGCTCCGCGGAAGCCCGTTAGGCCCCGTGGAAGCC  
 ATCTTCCACGACACGCAGATCCTCGACTTCCACCCGTACAAGCTCTACGGTATCCACCGC  
 CTCGATCGATCGATCTCCCTCTCTCTCTCTTTGTCGATCTCCTTCTTCTTCTCCGGCG  
 ACGGAGATGTATGCTGAGGACGAGGAGGAGGAAGGCTACATCTACTTCTTCAGCACGATG  
 CAGTTCAGATGCAGGAAGATTGTGGAGCGCGCGCGCAGGGCGGCCGGTGAAGGTGAAC  
 AACTGCGAGACTCTGGAGGTTGGCGGCGTCGCCGTTGGCCGGAAGTTCACCATGAATTC  
 TACGAGCATATCGGCGGCGACAACGACCTCATCTGGACCAACTGGGGCATGCAAGAGTTC  
 GCCAGGATCATCGGCCAAACAAGGAGCTCGCGGATCTTGCCTTGTACCGCCTATACAAG  
 AAGAAAATAACAAGGGGGACAGGCGAGGAGAAGCCGGAAGACATCGCCGCGGCTAGCGAT  
 GGCGATACCGAGAGCAGCATGAACAAGCGTAGACGTGTAGAAGCGTCGGCGGCGGCCATG  
 GCGCTGCCACCGCCACCGCCATCGCCAGGCCTGCCTGGAACAATGATGTTTCATGGCGGCG  
 GACCAGGCGAACGTGGCCTCGACCTCGCAGGAATGGCACGGCCAGTTCGCCAACGGCGCT  
 GCGGCGGCGCCGAGTCCTAGCGGCTGCTGGCCCTGGGCGCCACCGCCGACACCGAGCGCA  
 GTGGAGCCTTTCAGCTTCTGGGCCAGCGCGTCGGCGGCGACTCCTCCTGCCGCCGCGAAC  
 TACCACCCGTCGCCGAGCCGAGCCGTCGCCCGCAGGGCGGCGAGTACTACTCCAGA  
 CACGGCGCCTTCTCGGTGGCGCCCGTGCCCGCGTCCGCCTGCTCGACGCCGTCCCCGGAG  
 GCGGCGACCAGCTGCCTCTTGGCTACGACGTCACCTCTGCCGGCGGCAGGTACTGAGGGC  
 AGTGACAGTCAGCAGCAAGAACCCCCCTGCGAATTGATGGAATTTTGA

Protein

> **ONAC149**

MAAPEGQNKFAGVRFLPKDLELLAILDAKLGRSPLGPVEAIFHDTQILDFHPYKLYGIHR  
LDRSISLSLSLCRSPSSSPATEMYAEDEEEEGYIYFFSTMQFRCRKIVERAAQGGRWKVN  
NCETLEVGGVAVGRKFTMNFYEHIGGDNDLIWTNWGMQEFARIIGPNKELADLALYRLYK  
KKITRGTGEEKPEDIAAASDGDTESSMNKRRRVEASAAAMALPPPPSPGLPGTMMFMAA  
DQANVASTSQEWHGQFANGAAAAPSPSGCWPWAPPPTPSAVEPFSFWASASAATPPAAAN  
YHPSPQPQLPPQGGEYYSRHGAFSVAPVPASACSTPSPEAATSCLLATTSPLPAAGTEG  
SDSQQQEPPCELMEF\*

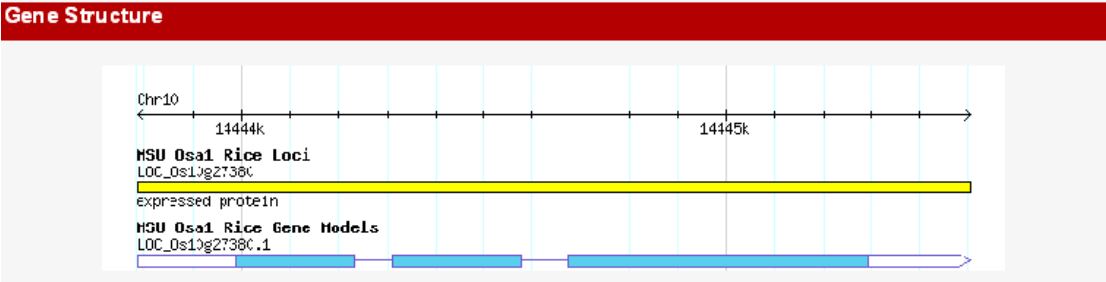

**LOC\_Os11g04360 (ONAC150) sequence information**

**Genomic sequence length:** 1911 nucleotides

**CDS length:** 1284 nucleotides

**Protein length:** 427 amino acids

**Putative Function:** alpha/beta hydrolase fold, putative, expressed

**Genomic Sequence**

**> ONAC150**

ACATTTTCACTGCTACGTACTCGATCATCTGGCCAGCTGCTGCCATGGCAACATTGCCGC  
AAATGGCCGCGACCAAGGAGCGTCAAGAGGCGGCTAACCCGACCACGACGACCAGGACGC  
TGGTCGAGTCCGTACCAACTGGATCCGCGTCTACTCCGACGGCTCCGTCGACCGCCTCG  
GCCCCCGGAAGCCGCGCGTTCATGGTCCTCGTCCCGCCGTACGACGACCCACGCGACG  
GGGTACCGTCCACGACGTCGCCACGGACCATGGCGTCGACGTCCGCCTGTACCTGACGA  
CGACGGCGCCGCCAGGCGCCGCCCTGTTCTCGTTCATTTCCACGGCGGCGGCTTCTGCT  
TGTCACGCGCCGCTGGTCGCTCTGCCACCGCTTCTACGCGCCGCTACCGTGGACCTCG  
ACGTCGCGGGCATCGTCTCCGTCGTCTCCCGCTCGCGCCGGAGCACCGCCTACCCGCCG  
CCATCGACGCCGACACGCCGCGTGTCTGCTCCGTGACGTGCGGTCCGGGGGACGCG  
ACACCATCGCACATCTGCGGTGGAACGCCCTTTGCGGCGCCGCCGACTTCTCACGCGTGT  
TCCTCATCGGCGACAGCGCGGGCGGCTCCTCGTGCAACGTGGCGGCACGCGCCGGCG  
AGGCTGGGGCCGAGGCGCTCGACCCGATACGCCCTCGCCGGTGGTGTCCAGCTCCACCCG  
GCTTCATCTTGCCGGAGAAGAGCCCGTCGGAGCTGGAGAACCCGCCCACCCCGTTCATGA  
CGCAGGAGACGGTGGACAAGTTCGTCTGTCTCGCGTTGCCGGTAGGCACCACCCGTACAC  
GTCTCCGGCGGCGGCGGTGACGGCGGCGGAGGGCGCCAGCTGCCGCCAATGCTGGTGAT  
GGTCGCGGAGGAGACATGCTCCGGGACGCGCAGACGGAGTACGGCGAGGCCATGGCGCG  
CGCGGGCAAGGCGGTGGAGACGGTGGTCAGCCGCGGCCGCGGGATCGGCCACGTGTTCTA  
CCTCAACTGGTTCGCCGTGGAGTCCGACCCCGTCGCGGCGGCGCGGGCGCGGGAGCTCGT  
CGACGCCGTCAAGAGCTTCGTGATAGCCACTGAAACAATGCTCTTCTTTCCCGACCGA  
TTCCAAGTTTGTACCGGTGTCTGCTGTACATCTAAATTTGTGTGAAATCCTGTACCTG  
TCACGTACTACTCCTACATCACAATGGCTCTGTATTTTAAACAACCTTCCCGCCAATAC

GTGTCTTCGTCTCTCCGATCCGCTTACGAAATTTTCGATTTGATGGAGCAATACGTCGAGA  
 AGATGCTCACTTTAGGCTTTTCGTTTCAACCCGTCTGCAGAGGATCTCATCACCTTCTACC  
 TGCCACGGCTGATCGCCGGCAAAGCCGACGAAAGACACCGAGAAGTTCATCTGCCGCGCC  
 GATGTTTACGGCAGCGAGCCCAGTGACCTCGCCGAAAGTTCGCGCCGGTGCCGAGGTGC  
 GAGAAAGGTGGCAGGCTCTTCTTCACTAGCTGCAAGCGGCACAAGGGGAGTAGCACCAGG  
 AAAGAGCGAACC CGGGGATGGCACCTGGGTGAGGCAGAACAGCAAGGGGGTGAAGAAC  
 AAGGCAGGGGTCAAGGTGCGCGAGACGCAGAACTTCCGTTTCAAGAAGGACGGGAGCTAC  
 ACCGACTGGCTGATGGAGGAGCACCCTGCTGCCGGCAGCAAGCCGTCGCCGGCGACGAG  
 GAGCCCGTCATCTGCCGGATGTATGTGTCGCCGAGGGCGCCTCCGGATTCCGCGGCGCGC  
 CAGGAATCCGCTGCTTTTGTGCAGCAGCAGCCGGCGCCGAGGTTTCCGAGCCGCCGTGC  
 GACAAGAAGAAGAGAGATGATGTGGCAGAAGAAGCCCCTGCCGAGCTTAG

CDS

> **ONAC150**

ATGGCAACATTGCCGCAAATGGCCGCGACCAAGGAGCGTCAAGAGGCGGCTAACCCGACC  
 ACGACGACCAGGACGCTGGTCGAGTCCGTACCAACTGGATCCGCGTCTACTCCGACGGC  
 TCCGTCGACCGCCTCGGCCCCGCCGAAGCCGCCGCTTCATGGTCCTCGTCCCGCCGTAC  
 GACGACCCACGCGACGGGGTCAACGTCCACGACGTCGCCACGGACCATGGCGTCGACGTC  
 CGCCTGTACCTGACGACGACGGCGCCGGCCAGGCGCCGCCCTGTTCTCGTTCATTTCCAC  
 GGCGGCGGCTTCTGCTTGTCCACGCCGCGTGGTCGCTCTGCCACCGCTTCTACGCCCCG  
 CTCACCGTGGACCTCGACGTCGCGGGCATCGTCTCCGTCGTCCTCCCGCTCGCGCCGGAG  
 CACCGCCTACCCGCCGCCATCGACGCCGGACACGCCGCGCTGCTCTGGCTCCGTGACGTC  
 GCGTCCGGGGGACGACACCATCGCACATCCTGCGGTGCAACGCCTTTGCGGCGCCGCC  
 GACTTCTACGCGTGTTCCTCATCGGCGACAGCGCGGGCGGCGTCTCGTGCACAACGTG  
 GCGGCACGCGCCGGCGAGGCTGGGGCCGAGGCGCTCGACCCGATACGCCTCGCCGGTGGT  
 GTCCAGCTCCACCCGGGCTTCATCTTGCCGGAGAAGAGCCCGTCGGAGCTGGAGAACCCG  
 CCCACCCCGTTTCATGACGCAGGAGACGGTGGACAAGTTCGTCTGTGCTCGCGTTGCCGCCG  
 ACGAAAGACACCGAGAAGTTCATCTGCCGCGCCGATGTTTACGGCAGCGAGCCAGTGAC  
 CTCGCCGAAAAGTTCGCGCCGGTGCCCAGGTGCGAGAAAAGGTGGCAGGCTCTTCTTCACT  
 AGCTGCAAGCGGCACAAGGGGAGTAGCACCAGGAAAAGAGCGAACC CGGGGGATGGCACC  
 TGGGTGAGGCAGAACAGCAAGGGGGTGAAGAACAAAGGCAGGGGTCAAGGTGCGCGAGACG  
 CAGAACTTCCGTTTCAAGAAGGACGGGAGCTACACCGACTGGCTGATGGAGGAGCACCAC  
 TGCTGCCGGCAGCAAGCCGTCGCCGGCGACGAGGAGCCCGTCATCTGCCGGATGTATGTG  
 TCGCCGAGGGCGCCTCCGGATTCCGCGGCGCGCCAGGAATCCGCTGCTTTTGTGCAGCAG  
 CAGCCGGCGCCGAGGTTTCCGAGCCCGCTGCGACAAGAAGAAGAGAGATGATGTGGCA  
 GAAGAAGCCCCTGCCGAGCTTAG

Protein

> **ONAC150**

MATLPQMAATKERQEANPTTTTRTLVESVTNWIRVYSDGSVDRLGPPEAAAFMVLVPPY  
 DDPRDGVTVHDVATDHGVDVRLYLTTAPARRRPVLVHFHGGGFCLSHAAWSLCHRFYAR  
 LTVDLVDVAGIVSVVLPAPHEHRLPAAIDAGHAALLWLRDVASGGSDTIAHPAVERLCGAA  
 DFSRVFLIGDSAGGVLVHNVAARAGEAGAEALDPIRLAGGVQLHPGFILPEKSPSELENP  
 PTPFMTQETVDKFFVLALPPTKDTEKFICRADVYGSEPSDLAGKFAPVPRCEKGGRLFFT

SCKRHKGSSTRKERTAGDGTWVRQNSKGVKNKAGVKVGETQNFRFKKDGSYTDWLMEEHH  
 CCRQQAVAGDEEPIVCRMVSPRAPPDSSAARQESAAFVQQQPAPQVSEPPCDKKKRDDVA  
 EEAPAAA\*

#### Gene Structure

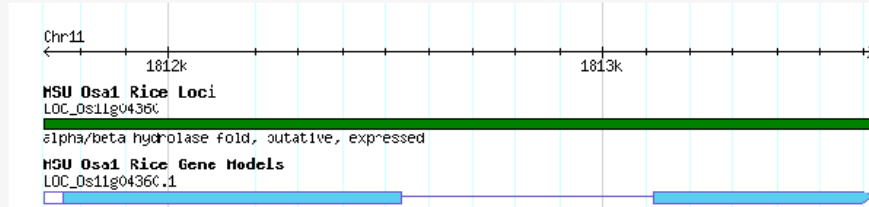

#### LOC\_Os11g31370 (ONAC151) sequence information

**Genomic sequence length:** 773 nucleotides

**CDS length:** 381 nucleotides

**Protein length:** 126 amino acids

**Putative Function:** hypothetical protein

#### Genomic Sequence

##### > ONAC151

ATGGCCGGTCCTCAGGTATGCATCAACTAAGTGAGCAGTACGAGTATTCACCATCCCCT  
 AGGTGTGTGTTCACCCACTACGGTGAGCTTGTATCAACTACCTTTACCAATGCGCCA  
 TTCAGATGTCTCTGCCCTATGACTTCATCACTGACATCGACATCCTTCACCATAATCCCT  
 TGGACATTGTCCCAAGTGAATATATTTTGACTTGTGTTGCCTTTGTTGTCCATTGAAAT  
 TATTAAGCCAAATCTTTGCAATCTTTGGTTTAATTCATCAATCTATAGCCTCACCTATG  
 ATATATTAGGTGTTTTGACGGTTAATTTCTTGTCTAATTCGTGTGTGTGCATATTTTCCT  
 TATGTTGGGTTTGGTGATGGAGCACGGCAGGAGAAGAAGAACGGGAAGCACTTCTTCACC  
 CGTAAGGAGAAAAAGCACCATGGCGACAACCTGTAGGAACCATGCCGCCGGCGTTGGGTTT  
 TGGAGGTTAGCAAGCACAGAGGCACTGGTATACAAGAATTCGGTGATGGCTCTGATAAAG  
 TGATAGTGGGTATGAAGCACACCCCTGGTGTCCACTACAGGAAGTCTTCATTTGCCGAGA  
 GCATGGAATGGGCAATGCAAGAGTTCCAACCTAGCTGGTTCCTACCTCTTGCCTTGCTTTG  
 TGATGCGGTTTGCCACCAGTGATGGCACAGAACCAACCTTTTGGCTGCACTAGAGTGACCA  
 TTGCCAACATGAGACACTGCATCCTAACACCATATTGTTGTTTTATTGGATAA

#### CDS

##### > ONAC151

ATGGCCGGTCCTCAGATGTCTCTGCCCTATGACTTCATCACTGACATCGACATCCTTCAC  
 CATAATCCCTTGGACATTGTCCCAACACGGCAGGAGAAGAAGAACGGGAAGCACTTCTTC  
 ACCCGTAAGGAGAAAAAGCACCATGGCGACAACCTGTAGGAACCATGCCGCCGGCGTTGGG  
 TTTTGGAGGAAGTCTTCATTTGCCGAGAGCATGGAATGGGCAATGCAAGAGTTCCAACCTA  
 GCTGGTTTCCTACCTCTTGCCTTGCTTTGTGATGCGGTTTGGCACCAAGTGATGGCACAGAA  
 CAACCTTTTGGCTGCACTAGAGTGACCATTGCCAACATGAGACACTGCATCCTAACACCA  
 TATTGTTGTTTTATTGGATAA

Protein

> **ONAC151**

MAGPQMSLPYDFITDIDILHHNPLDIVPTRQEKKNGKHFFTRKEKKHHGDNCRNHAAGVG  
FWRKSSFAESMEWAMQEFQLAGSYLLPCFVMRFATSDGTEQPFGCTRVTIANMRHCILTP  
YCCFIG\*

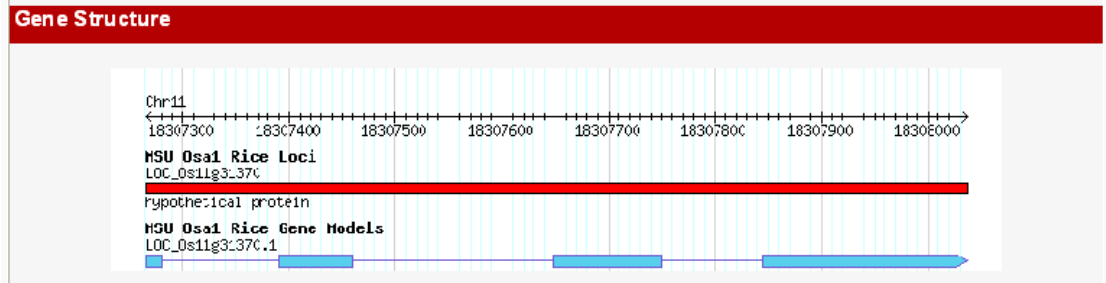



**Supplementary File 8.** Real-time PCR primers of 30 selected *ONAC* genes and actin gene (Os05g36290).

| Locus      | Name           | Primers (5'–3') |                          | Size (bp) |
|------------|----------------|-----------------|--------------------------|-----------|
| Os03g60080 | <i>SNAC1</i>   | Forward         | CATCCCCAGGAACAACAGCA     | 64        |
|            |                | Reverse         | GTACATGCCCTGGATATCGTCG   |           |
| Os07g12340 | <i>OsNAC3</i>  | Forward         | AGAAGGCGCTCGTGTCTACCA    | 65        |
|            |                | Reverse         | GTGCATGATCCACTCCGTCTTGAC |           |
| Os01g60020 | <i>OsNAC4</i>  | Forward         | AGACGGACTGGATCATGCACGA   | 82        |
|            |                | Reverse         | TCCAGCTTCTGTGAGCCCTTCTTG |           |
| Os11g08210 | <i>OsNAC5</i>  | Forward         | ACAACGCCCTCAGGTTGGATGA   | 73        |
|            |                | Reverse         | TCGTACCTCTCGATCACTCCCTTC |           |
| Os01g66120 | <i>OsNAC6</i>  | Forward         | AACAGCCTCAGGTTGGATGATTGG | 60        |
|            |                | Reverse         | CAGCCCGCCCTTCTTGTGTAAAT  |           |
| Os01g15640 | <i>OsNAC8</i>  | Forward         | TGCAAAGTGCATGTTCCAA      | 138       |
|            |                | Reverse         | ATGGCTCGATCCTTTCCAGTG    |           |
| Os07g37920 | <i>ONAC010</i> | Forward         | TTGCCATCGGAGTCAGCAG      | 78        |
|            |                | Reverse         | TGGAGAGTTGGAACGGATGC     |           |
| Os05g37080 | <i>ONAC012</i> | Forward         | GGGCCAAGACCAAGTGGAAGAT   | 114       |
|            |                | Reverse         | TGAAGTCACTCCTCGTCTGGAGAT |           |
| Os01g01430 | <i>ONAC016</i> | Forward         | ACTACTCCGACGACCTCCC      | 100       |
|            |                | Reverse         | CTCCATAGTTTTGTGCCTCTT    |           |
| Os01g01470 | <i>ONAC020</i> | Forward         | TGCAGATGCCATCCATGTCTGAC  | 64        |
|            |                | Reverse         | AGTGAAGCGGTGGTGGAGAAGT   |           |
| Os03g04070 | <i>ONAC022</i> | Forward         | AAGGAGGACATGGTGCTCTGCAAG | 89        |
|            |                | Reverse         | TGCATCTCTTCCATTGCCGAGGCT |           |
| Os02g12310 | <i>ONAC023</i> | Forward         | TTCAGTGGGGTTGAATGGTGATGG | 61        |
|            |                | Reverse         | TGGAGGCTCAAGGTGATCAAGGAT |           |
| Os01g29840 | <i>ONAC026</i> | Forward         | TCTACCTGGCTTCCCGCTTCAGAT | 60        |
|            |                | Reverse         | GACGGGTTCCTCAACAACTGCT   |           |
| Os11g03370 | <i>ONAC045</i> | Forward         | TTGCAGCACCAGGCAGCAAT     | 67        |
|            |                | Reverse         | TGCCAAGAGGATTTGGGAGACGAA |           |
| Os08g02160 | <i>ONAC049</i> | Forward         | TCTTCCCGCTCTGGCCTCAATT   | 72        |
|            |                | Reverse         | TTTCGGTACTTGCGGTCCCTTG   |           |
| Os03g02800 | <i>ONAC054</i> | Forward         | CTTCCATCCAAGGTGGATGTTG   | 117       |
|            |                | Reverse         | GCCAATCTTCGTGTCAAGGCT    |           |
| Os03g21060 | <i>ONAC058</i> | Forward         | AACGGTTCATGCGTTGGTG      | 102       |
|            |                | Reverse         | CATCCCCATGTTAGAGTGGAGC   |           |
| Os10g21560 | <i>ONAC061</i> | Forward         | GGAATGACCATAACGCAGCTG    | 108       |
|            |                | Reverse         | CAAACCCTTGTTTCAGGTGGACT  |           |
| Os08g33910 | <i>ONAC063</i> | Forward         | GGATCTCCCAAAGCTTGCG      | 112       |
|            |                | Reverse         | GAACCCAGCTGTTGTCACCC     |           |
| Os03g56580 | <i>ONAC066</i> | Forward         | AGACCGACTGGATGATGCACGA   | 99        |
|            |                | Reverse         | TGCAGATGGTCCAGACCTCAGCTT |           |

Supplementary File 8. *Cont.*

| Locus      | Name           |         | Primers (5'-3')           | Size (bp) |
|------------|----------------|---------|---------------------------|-----------|
| Os03g39100 | <i>ONAC069</i> | Forward | GGGATCAAGAAAGCGCGACTCA    | 68        |
|            |                | Reverse | AGGCACGTATCCGTCGAACAGA    |           |
| Os01g66490 | <i>ONAC075</i> | Forward | GCCGGCAGCCACAACCTATAG     | 64        |
|            |                | Reverse | TTGGTTGATGCGACGACG        |           |
| Os05g34830 | <i>ONAC088</i> | Forward | TGGGTCCTGTGCCGAATCTACAAC  | 99        |
|            |                | Reverse | GGTCTCCCCGTGGCTCATCATATT  |           |
| Os06g51070 | <i>ONAC095</i> | Forward | CATTCCCGACACCATGCAAT      | 68        |
|            |                | Reverse | CCTTCCGGTAGACCTTGCAGA     |           |
| Os07g04560 | <i>ONAC096</i> | Forward | GCAACGTGAACGGTGGCTAC      | 61        |
|            |                | Reverse | GCTGCTACTGTTCCATTGCTCC    |           |
| Os07g48450 | <i>ONAC103</i> | Forward | CGATTCCGCAACGTCTCCATGA    | 64        |
|            |                | Reverse | CGGACTTCTTGTAGATCCGGCAGA  |           |
| Os10g42130 | <i>ONAC121</i> | Forward | GCGTGATCAAGAGGCACGA       | 72        |
|            |                | Reverse | TGCTGATCATTCCTTTCGCC      |           |
| Os11g03300 | <i>ONAC122</i> | Forward | TTCCTTTGATGATGGCAGCAGCA   | 60        |
|            |                | Reverse | TGCGGTTTCTTGACAACGGCAT    |           |
| Os12g03040 | <i>ONAC131</i> | Forward | ATCCATGACCATGAGGCTGGACGA  | 119       |
|            |                | Reverse | GCTGTTTCATCGACGGTTGATCCCT |           |
| Os12g03050 | <i>ONAC132</i> | Forward | TGACCCCAGCATCTACTTCGTCAG  | 80        |
|            |                | Reverse | CGGAATAAACC GCGTTGTTGTTGT |           |
| Os05g36290 | Actin1         | Forward | ATCCTTGTATGCTAGCGGTCGA    | 118       |
|            |                | Reverse | ATCCAACCGGAGGATAGCATG     |           |
